# Supplementary material for: Regulation of CHK1 inhibitor resistance by a c-Rel and USP1 dependent pathway
Source: Oxford University Press journal article supplement (doi:10.1042/bcj20220102), 2022-10-14

## Supplementary Information

### Regulation of CHK1 inhibitor resistance by a c-Rel and USP1 dependent pathway

Jill E. Hunter<sup>1</sup>, Amy E. Campbell<sup>2</sup>, Nicola L. Hannaway<sup>1</sup>, Scott Kerridge<sup>1</sup>, Saimir Luli<sup>3</sup>,  
Jacqueline A. Butterworth<sup>1</sup>, Helene Sellier<sup>1</sup>, Reshmi Mukherjee<sup>1</sup>, Nikita Dhillon<sup>1</sup>, Praveen  
Dhondurao Sudhindar<sup>1</sup>, Ruchi Shukla<sup>1</sup>, Philip J. Brownridge<sup>2</sup>, Hayden L. Bell, Jonathan  
Coxhead<sup>1</sup>, Leigh Taylor<sup>1</sup>, Peter Leary<sup>4</sup>, Megan S.R. Hasoon<sup>4</sup>, Ian Collins<sup>5</sup>, Michelle D.  
Garrett<sup>6</sup>, Claire E. Eyers<sup>2\*</sup> and Neil D. Perkins<sup>1\*</sup>

<sup>1</sup> Newcastle University Biosciences Institute

Faculty of Medical Sciences

Newcastle University

Newcastle Upon Tyne, NE2 4HH, UK

<sup>2</sup>Centre for Proteome Research, Department of Biochemistry and Systems Biology,

Institute of Systems, Molecular and Integrative Biology,

University of Liverpool,

Liverpool L69 7ZB, U.K.

<sup>3</sup>Newcastle University Clinical and Translational Research Institute

Preclinical In Vivo Imaging (PIVI)

Faculty of Medical Sciences

Newcastle University

Newcastle Upon Tyne, NE2 4HH, UK

<sup>4</sup>Bioinformatics Support Unit,

Faculty of Medical Sciences

Newcastle University

Newcastle Upon Tyne, NE2 4HH, UK

<sup>5</sup>The Institute of Cancer Research

Sutton, SM2 5NG, UK

<sup>6</sup>School of Biosciences,

Stacey Building,

University of Kent,

Canterbury, Kent, CT2 7NJ, UK

\* joint corresponding author

Tel. 0191 2082245

Fax. 0191 2087424

Email: [neil.perkins@ncl.ac.uk](mailto:neil.perkins@ncl.ac.uk)

Email: [Claire.Eyers@liverpool.ac.uk](mailto:Claire.Eyers@liverpool.ac.uk)

## Supplementary Figures

### Supp Figure 1

(A) Line graphs showing the mean response of the five reimplanted E $\mu$ -Myc and E $\mu$ -Myc/*cRel*<sup>-/-</sup> (blue) tumours and their response to CCT244747 in further lymphoid organs. Each of the 5 tumours was implanted into 6 syngeneic recipient C57Bl/6 mice, 3 were treated with CCT244747 (100 mg/kg p.o), and 3 with vehicle control, for 9 days once tumours became palpable. A response was defined as a significant reduction (or increase) in tumour burden (P<0.05) using unpaired Student's t-tests. Please note that the data from WT E $\mu$ -Myc mice shown here is also used in our study on RelA T505A E $\mu$ -Myc lymphomas [19]. These experiments were performed in parallel as part of the same larger study.

(B) E $\mu$ -Myc, E $\mu$ -Myc/*cRel*<sup>-/-</sup> and E $\mu$ -Myc/*T505A* tumours were treated with 0.5  $\mu$ M or 1  $\mu$ M CCT244747 (or vehicle control) for 96 hours *ex vivo*. E $\mu$ -Myc tumour cells show a reduced cell viability compared with the E $\mu$ -Myc/*cRel*<sup>-/-</sup> or E $\mu$ -Myc/*T505A* tumour cells at all doses of CCT244747 tested.

### Supp Figure 2

(A) Schematic illustrating the workflow for proteomics experiments. Splenic tumours from E $\mu$ -Myc or E $\mu$ -Myc/*cRel*<sup>-/-</sup> mice were necropsied 8 hours post-treatment with either CHK1 inhibitor CCT244747 or vehicle control. Proteins were extracted and digested with trypsin prior to peptide labelling with tandem mass tags (TMT). Differentially labelled peptides from each treatment condition were mixed then fractionated via basic reverse-phase liquid chromatography, initially into 65 fractions which were concatenated into 5 pools. For each pool, 5% of the material was analysed by LC-MS/MS to obtain relative-quantification of total protein levels whilst the remaining 95% was subject to titanium dioxide (TiO<sub>2</sub>)-based phosphopeptide enrichment prior to LC-MS/MS analysis for phosphoproteomic analysis.

(B & C) Volcano plots demonstrating a significant number of CCT244747 effects in E $\mu$ -Myc WT lymphomas on both the total (A) and phospho (B) proteome, with both down- (red dots) and up-regulation (blue dots) being observed.

Please note that figures (B) and (C) showing data from WT E $\mu$ -Myc lymphomas are replicated in another manuscript [19], where they are used for comparison with data from RelA T505A E $\mu$ -Myc lymphomas.

### Supp Figure 3

(A) Table detailing the number of phosphopeptides (orange column) and proteins (blue column) that were significantly different when the genotypes and/or treatment arms were compared after proteomic analysis in the acute CCT244747 study. A significant different was defined as an adjusted p value of <0.05

(B) Venn diagram illustrating that there is a high number of phosphosite changes in the E $\mu$ -Myc/*cRel*<sup>-/-</sup> lymphomas without inhibitor treatment, but there is also a high level of overlap between these and the WT lymphomas following CCT244747 treatment.

(C) Venn diagram illustrating that there is a high number of total protein changes in the E $\mu$ -Myc/*cRel*<sup>-/-</sup> lymphomas without inhibitor treatment, but there is also a high level of overlap between these and the WT lymphomas following CCT244747 treatment.

(D) Wider STRING analysis of the proteins associated with the 589 down-regulated phosphopeptides in the E $\mu$ -Myc/*cRel*<sup>-/-</sup> lymphomas. Analysis performed under medium confidence setting as in Fig 2D but CHK1 was not added manually to the protein list. The red box indicates the same cluster of proteins with known linkages to CHK1 or CHK1 signalling, shown in Fig 2D. Positions of proteins within the network can change when CHK1 is added or removed but the connections themselves are not altered. See Supp Data File 2 for further details in linkages and analysis.

(E & F) String analysis performed as in Fig 2D and S3D but using the high confidence setting. In (E), to illustrate the links to CHK1, this was added manually into the analysis (circled in red), while (F) shows the same analysis without CHK1. Since the string analysis was limited to only the query proteins, this does not increase the number of connections apart from those to CHK1 itself (Supp Data File 2). Positions of proteins within the network can change when CHK1 is

added or removed but the connections themselves are not altered. See Supp Data File 2 for further details in linkages and analysis.

#### **Supp Figure 4**

Pearson correlation between fold changes ( $\log_2$ ) for proteins/phosphopeptides down-regulated in  $E\mu$ -Myc/c-Rel<sup>-/-</sup> lymphomas, and fold changes ( $\log_2$ ) for the same proteins/phosphopeptides in WT  $E\mu$ -Myc lymphomas after CCT244747 treatment, with both normalised to control treated WT  $E\mu$ -Myc lymphomas. Although there is a positive correlation in the changes observed at both protein and phosphopeptide level under these conditions, the magnitude of the fold change seen in WT  $E\mu$ -Myc lymphomas after CCT244747 treatment is generally much less than that observed in  $E\mu$ -Myc/c-Rel<sup>-/-</sup> lymphomas. Blue dots indicated proteins or phosphopeptides that are downregulated in both conditions. Black dots indicate phosphopeptides that are downregulated in  $E\mu$ -Myc/c-Rel<sup>-/-</sup> lymphomas but upregulated in WT  $E\mu$ -Myc lymphomas after CCT244747 treatment. The solid black line represents the linear regression line with the shaded region showing a 95% confidence interval. The dashed line shows where the regression line would fall if fold changes were identical between the compared conditions.

#### **Supp Figure 5**

(A) Table showing the  $\log_2$  fold change (FC) and adjusted p value (pAdj) RNA Seq data for the 32 genes associated with the 'Activation of ATR in response to replication stress' (<https://reactome.org/content/detail/R-HSA-176187>) in the  $E\mu$ -Myc c-Rel<sup>-/-</sup> tumours when compared with  $E\mu$ -Myc WT tumours.

(B) Venn diagram showing the overlap between downregulated protein encoding transcripts (from RNA Seq data) vs down regulated proteins (from total proteome data) in REL<sup>-/-</sup> vs WT  $E\mu$ -Myc lymphomas.

(C) Western blot analysis of phospho-Ser345 CHK1, CHK1, CDK2 or ACTIN in snap frozen tumour extracts prepared from different re-implanted  $E\mu$ -Myc and  $E\mu$ -Myc/cRel<sup>-/-</sup> tumours to

those used in Fig 2B. Mouse inguinal lymph nodes were extracted 8 hours following a single dose of CCT244747. The expression of CHK1 and related pathway components are lost in E $\mu$ -Myc/*c-rel*<sup>-/-</sup> tumours.

(D) Cycle cell analysis of E $\mu$ -Myc WT and E $\mu$ -Myc/*cRel*<sup>-/-</sup> lymphoma cells. Single cell suspensions from 6 different E $\mu$ -Myc WT and E $\mu$ -Myc/*cRel*<sup>-/-</sup> lymphomas were permeabilised and stained with propidium iodide (PI) before analysis by flow cytometry.

### Supp Figure 6

(A) Western blot analysis of  $\gamma$ H2AX or ACTIN in extracts prepared from WT and CCT244747 resistant U2OS cells treated with 1  $\mu$ M CHK1 inhibitor, CCT244747, 1  $\mu$ M CHK2 inhibitor, CCT241533 or solvent controls.

(B) Western blot analysis of USP1, USP14 or ACTIN in snap frozen tumour extracts prepared from an additional re-implanted E $\mu$ -Myc and E $\mu$ -Myc/*cRel*<sup>-/-</sup> tumour. Mouse inguinal lymph nodes were harvested 8 hours following a single dose of CCT244747. USP1 and USP14 expression is lost in E $\mu$ -Myc/*c-Rel*<sup>-/-</sup> tumours. Please note that the Actin blot from this figure is also used in another study (Fig. S2C lower panel) [19], where the same membrane was probed with antibodies to other proteins.

(C) CCT244747 resistant (CR) U2OS cell lines are resistant to treatment with the USP1 inhibitor, ML323. Bar graph data showing clonogenic survival in WT and CR U2OS following either treatment with 30  $\mu$ M ML323 or solvent controls for 24 hours. Data was analysed using One-way ANOVA with multiple comparisons and Sidak's post-hoc test. P values of  $p < 0.05$  were considered significant.

(D) Further western blot analysis of independent isolates of WT or CCT244747 resistant (CR) U2OS cells treated with CCT244747, the USP1 inhibitor, ML323, or the Proteasome inhibitor MG-132, alone or in combination. Blots were probed for CHK1, USP1,  $\gamma$ H2AX or ACTIN. Inhibition of USP1 in WT U2OS results in the loss of CHK1. Proteasomal inhibition in the CCT244747 resistant U2OS cells results in the stabilization of CHK1 protein.

## **Supplementary data files**

### **Supp Data File 1 Proteomics.xlsx**

Data from proteomics analysis of reimplanted E $\mu$ -Myc lymphoma cells with either vehicle or of CHK1i (CCT244747) treatment for 8 hours. Please note, this data file also accompanies two other manuscripts where we use E $\mu$ -Myc lymphoma cells [19, 38].

### **Supp Data File 2 STRING interactions.xlsx**

STRING interaction data analysing the links between phosphorylated proteins identified from phospho proteomics analysis.

### **Supp Data File 3 Venn diagrams.xlsx**

Data files from Venn analysis of E $\mu$ -Myc lymphoma cell proteomics and RNA Seq data

Supp Data File 4. Down regulated phosphopeptide analysis

Data analysing the phosphopeptides and phosphosites downregulated in E $\mu$ -Myc/cRel<sup>-/-</sup> lymphomas or in E $\mu$ -Myc WT lymphomas after CCT244747 treatment.

### **Supp Data File 5 RNASeq\_all\_genes\_list\_EuMyc.xlsx**

Gene lists from RNA Seq analysis of reimplanted E $\mu$ -Myc lymphoma cells with either vehicle or of CHK1i (CCT244747) treatment for 8 hours. Please note, this data file also accompanies two other manuscripts where we use E $\mu$ -Myc lymphoma cells [19, 38].

### **Supp Data File 6 RNASeq\_counts\_timport\_EuMyc.xlsx**

Data for all genes and samples from RNA Seq analysis of reimplanted E $\mu$ -Myc lymphoma cells. Please note, this data file also accompanies two other manuscripts where we use E $\mu$ -Myc lymphoma cells [19, 38].

**Supp Data File 7 RNASeq all\_genes\_list\_U2OS.xlsx**

Gene lists from RNA Seq analysis of wild type control and CHK1i (CCT244747) resistant U2OS cells with or without CCT244747 treatment for 24 hours.

**Supp Data File 8 RNA Seq counts\_tximport\_U2OS.xlsx**

Data for all genes and samples from RNA Seq analysis of U2OS cells.

Hunter et al., Figure S1

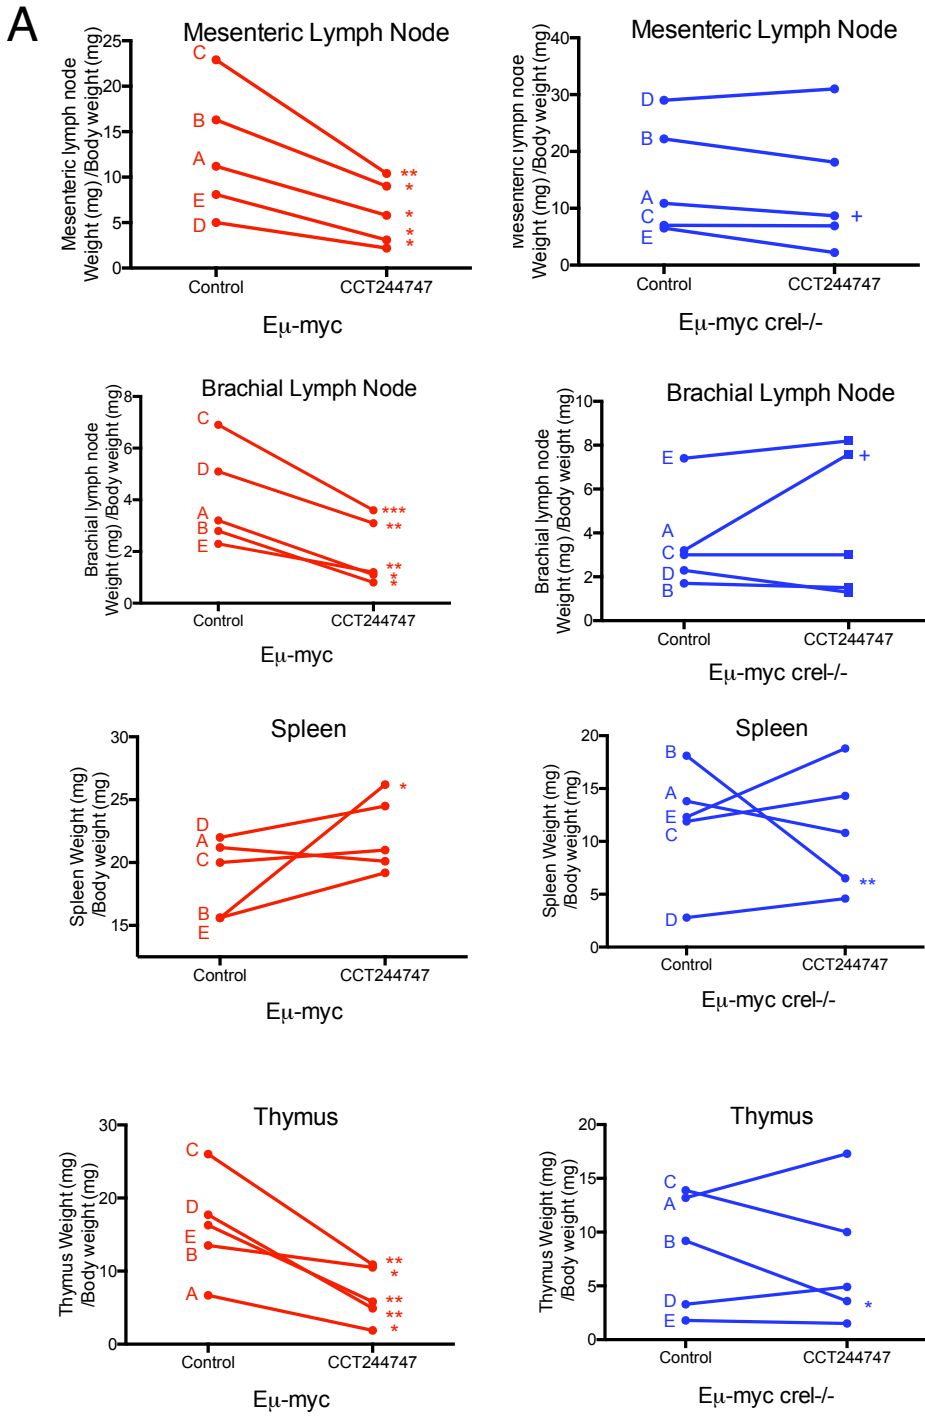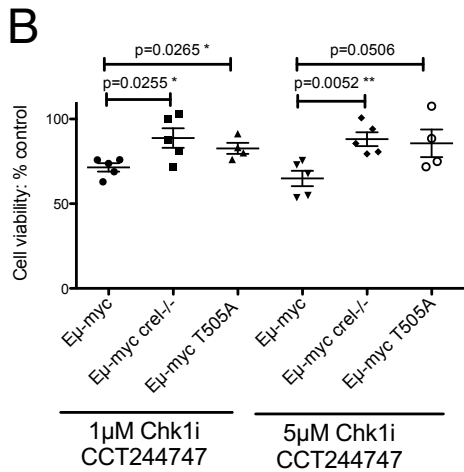



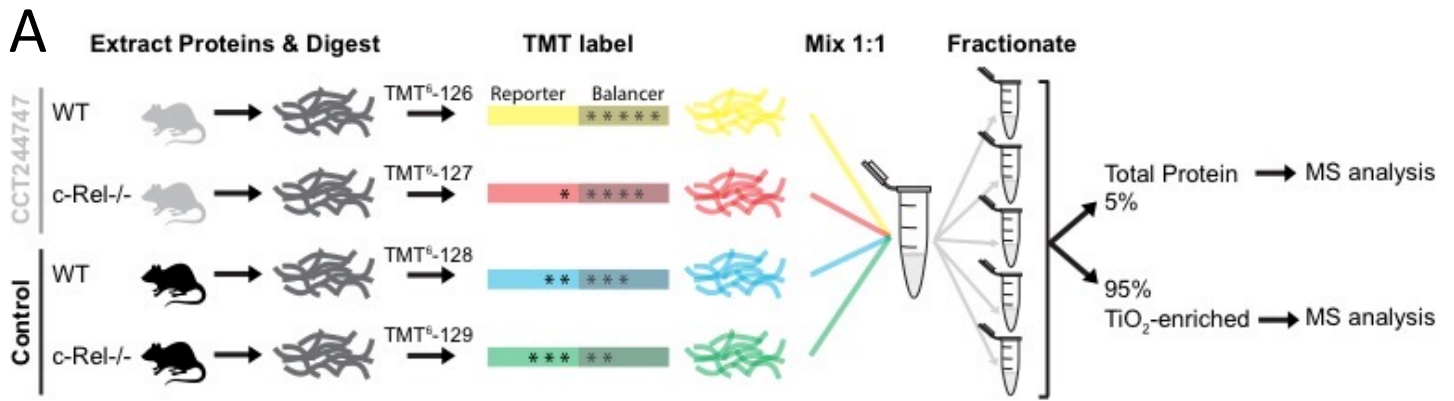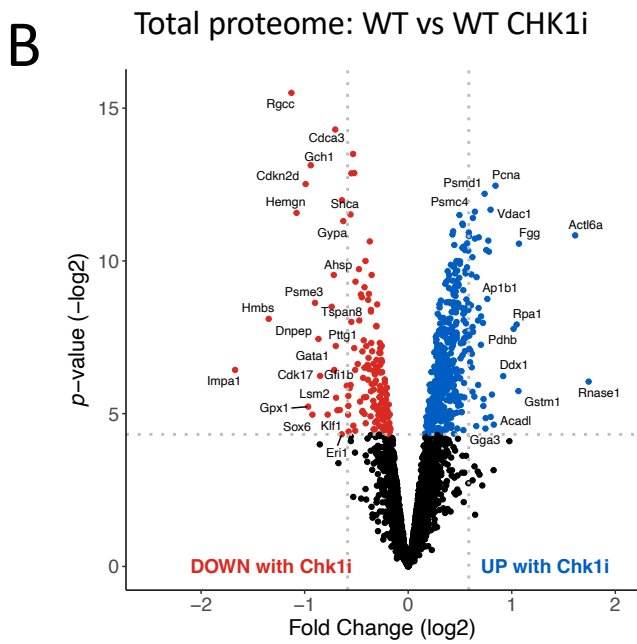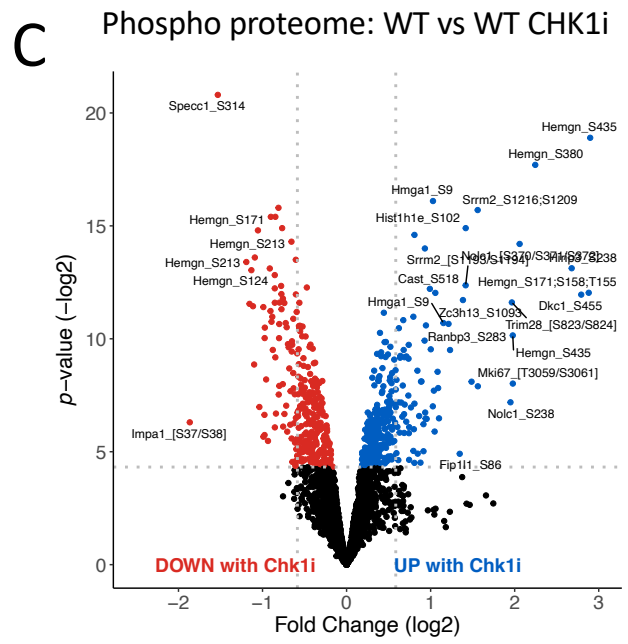

**A**

| Ratio                   | #Phosphopeptides significant |                      | #Proteins significant |                      |
|-------------------------|------------------------------|----------------------|-----------------------|----------------------|
|                         | <i>p</i> value ≤ 0.05        | <i>q</i> value ≤ 0.1 | <i>p</i> value ≤ 0.05 | <i>q</i> value ≤ 0.1 |
| WT_Control/WT_Chk1i     | 625                          | 165                  | 622                   | 0                    |
| cREL_Control/cREL_Chk1i | 89                           | 0                    | 162                   | 0                    |
| cREL_Control/WT_Control | 1106                         | 830                  | 966                   | 634                  |
| cREL_Chk1i/WT_Chk1i     | 691                          | 31                   | 943                   | 394                  |

**B**

Phosphosite overlap

WT vs WT Chk1i

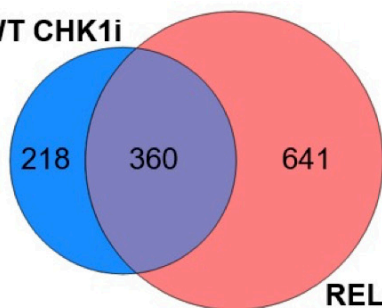

REL-/- vs WT  
no inhibitor

**C**

Total proteome overlap

WT vs WT Chk1i

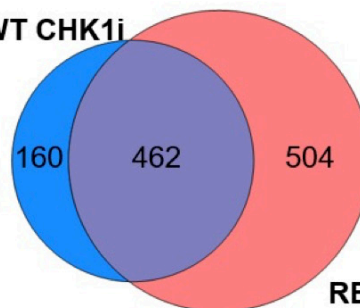

REL-/- vs WT  
no inhibitor

**D**

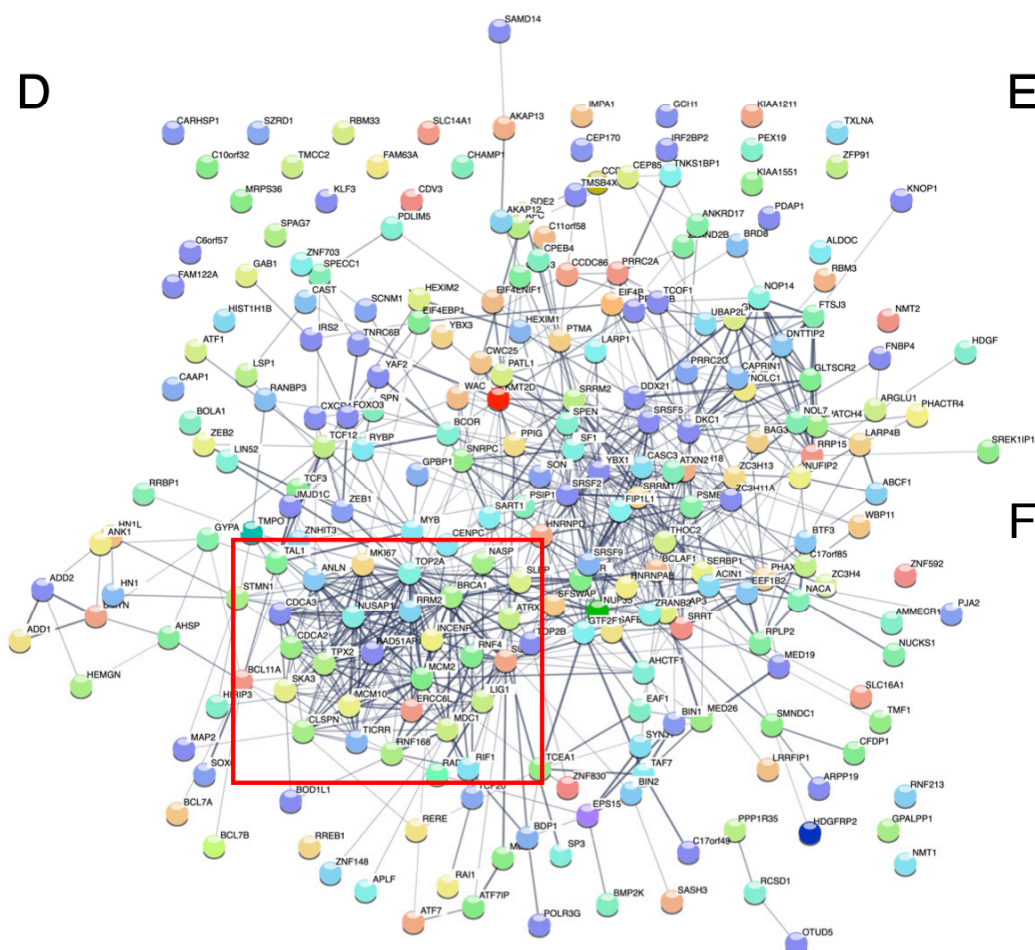

**E**

CHK1 added  
(high confidence network)

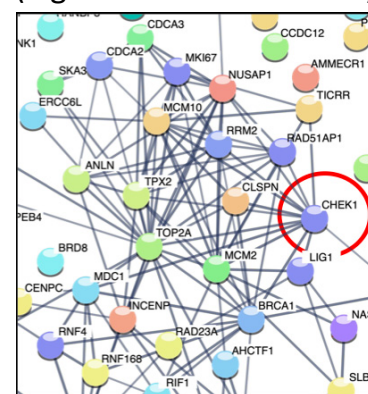

**F**

No CHK1 added  
(high confidence network)

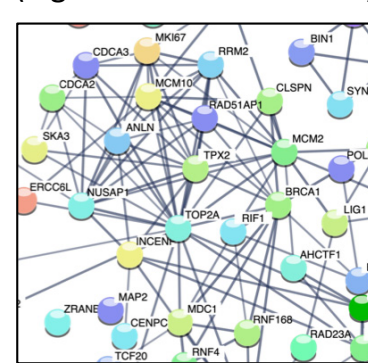

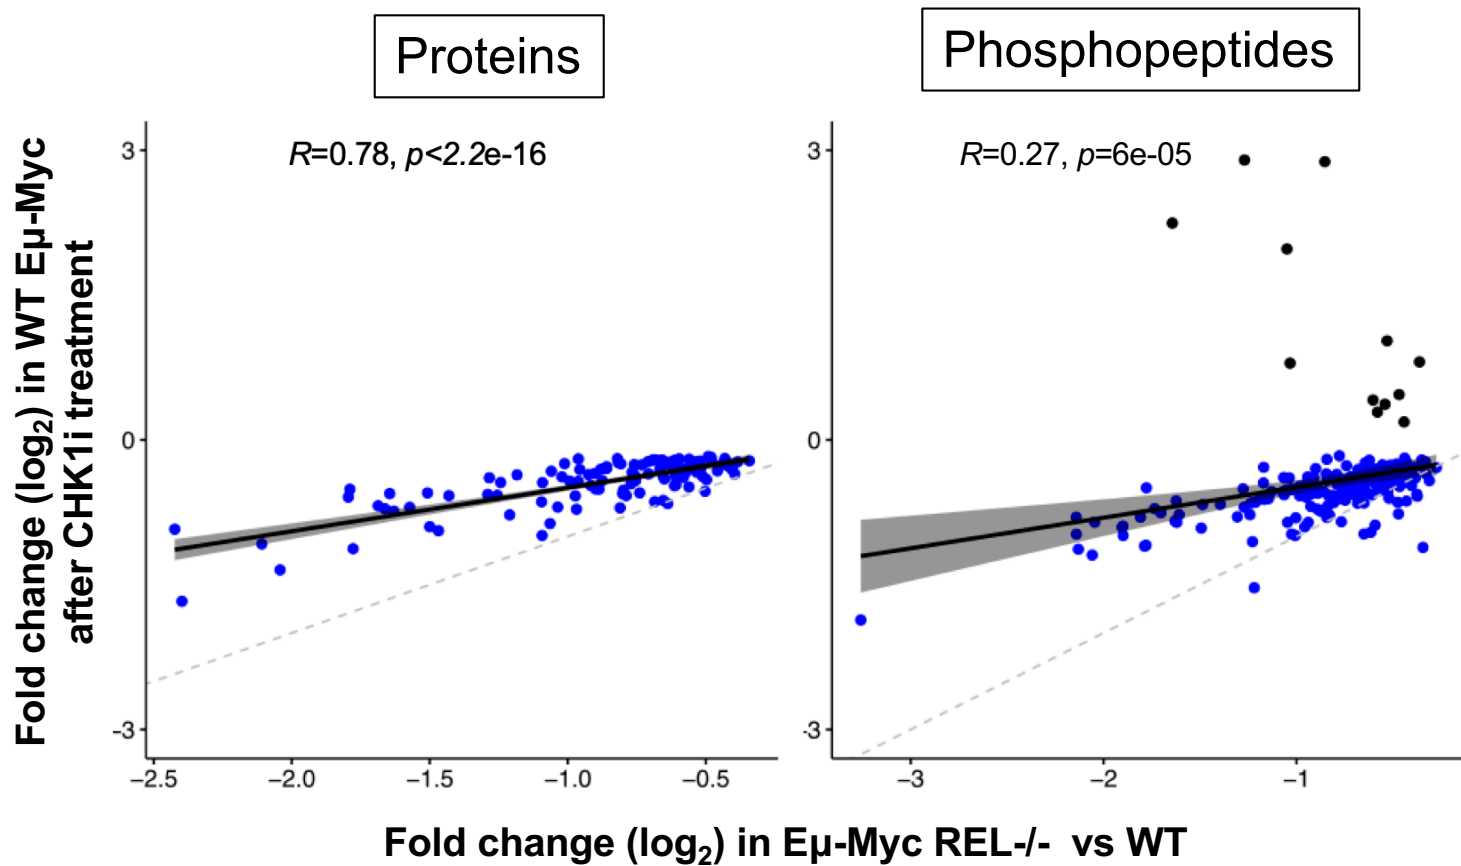

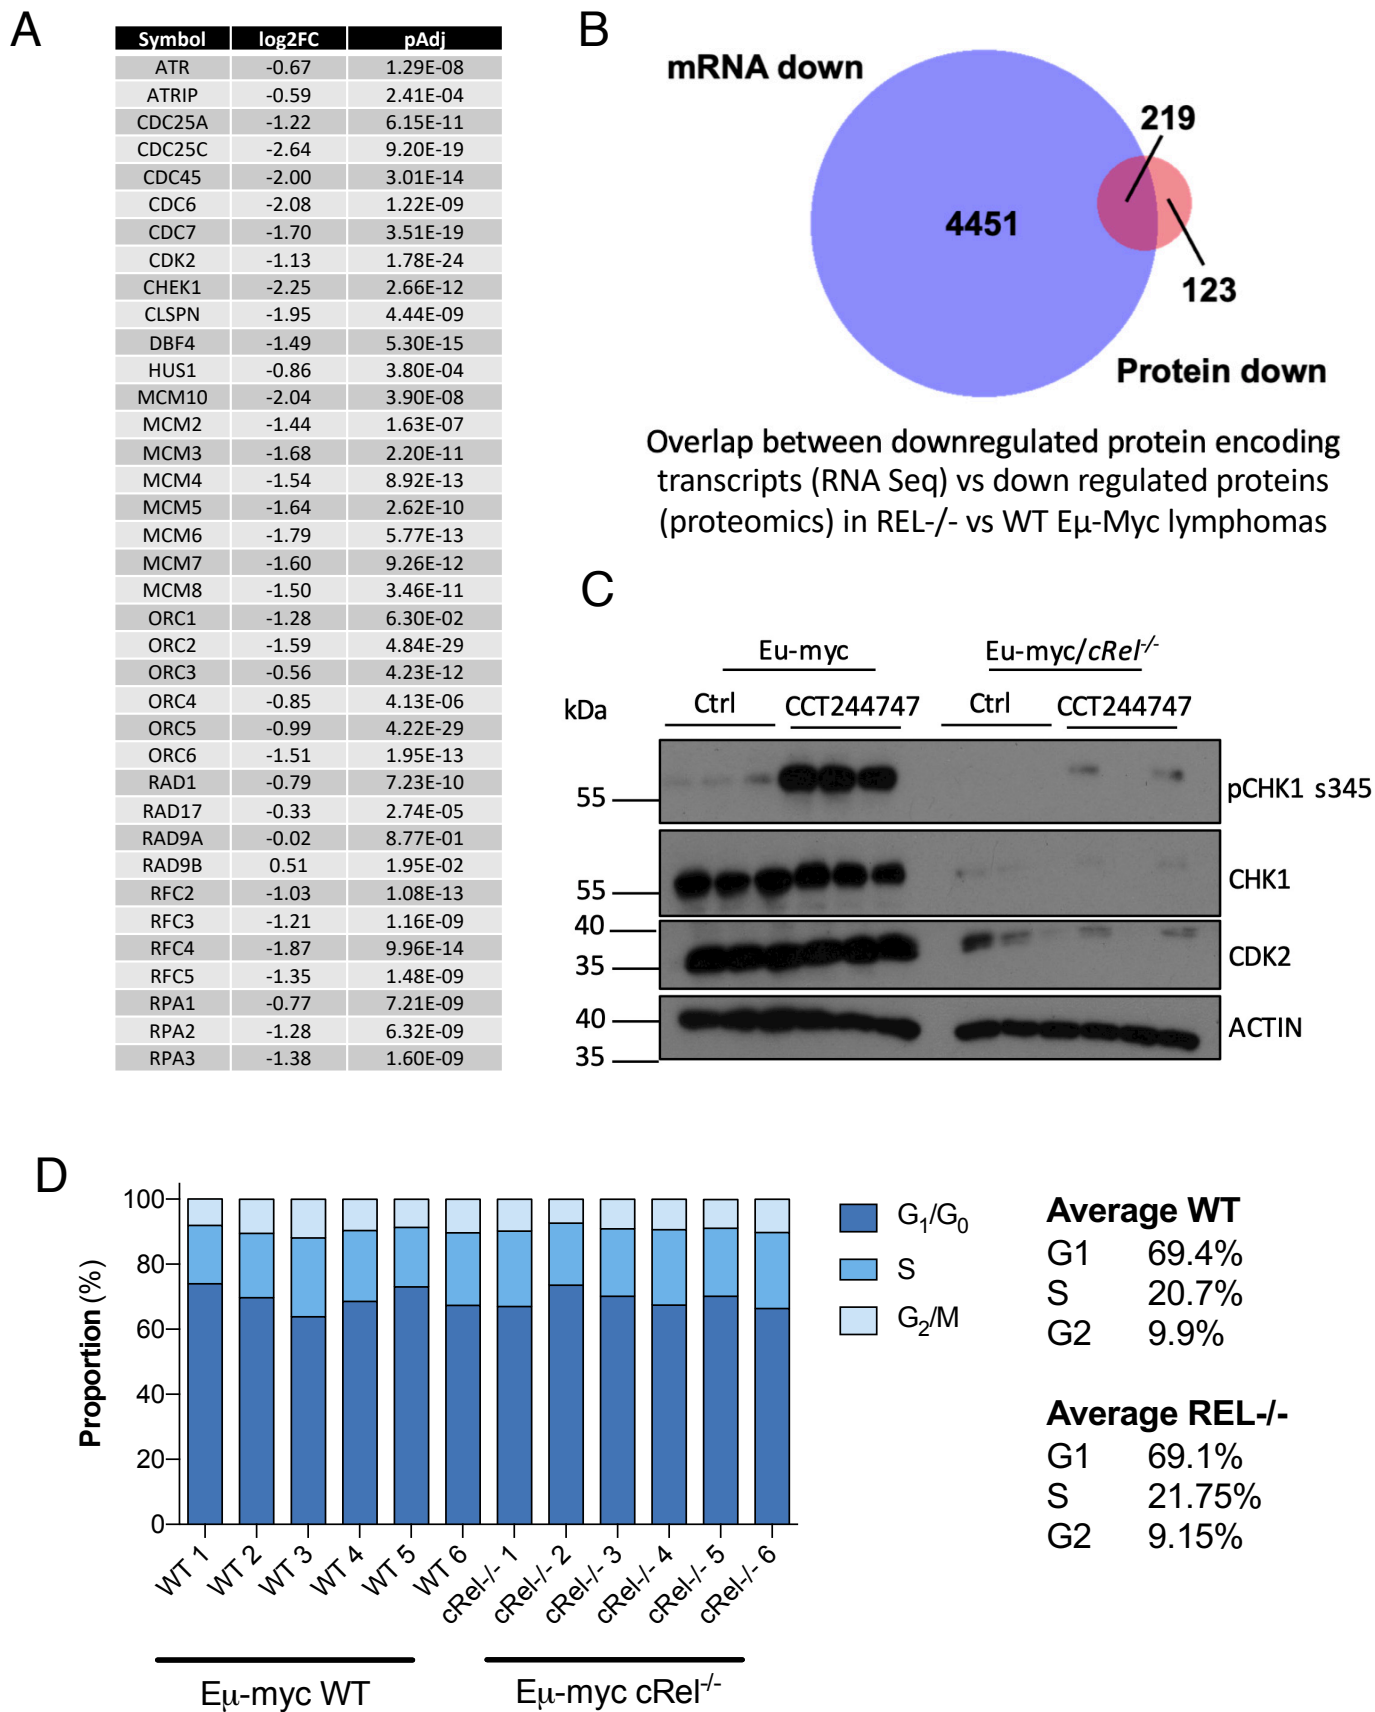

A

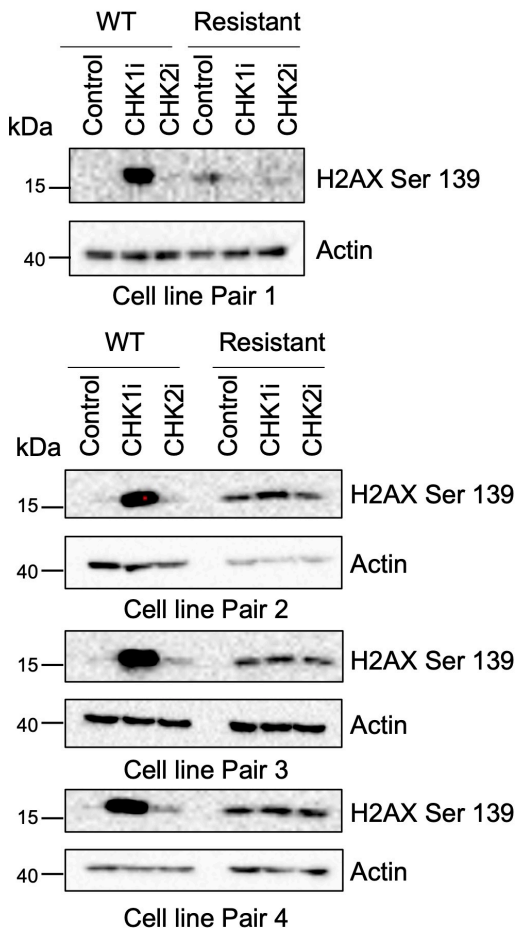

B

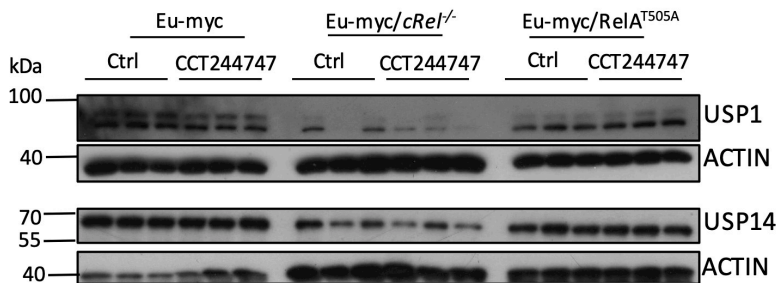

C

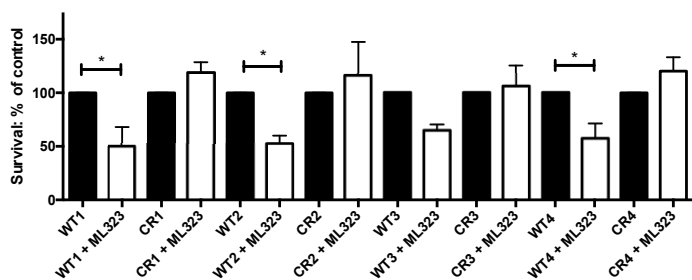

D

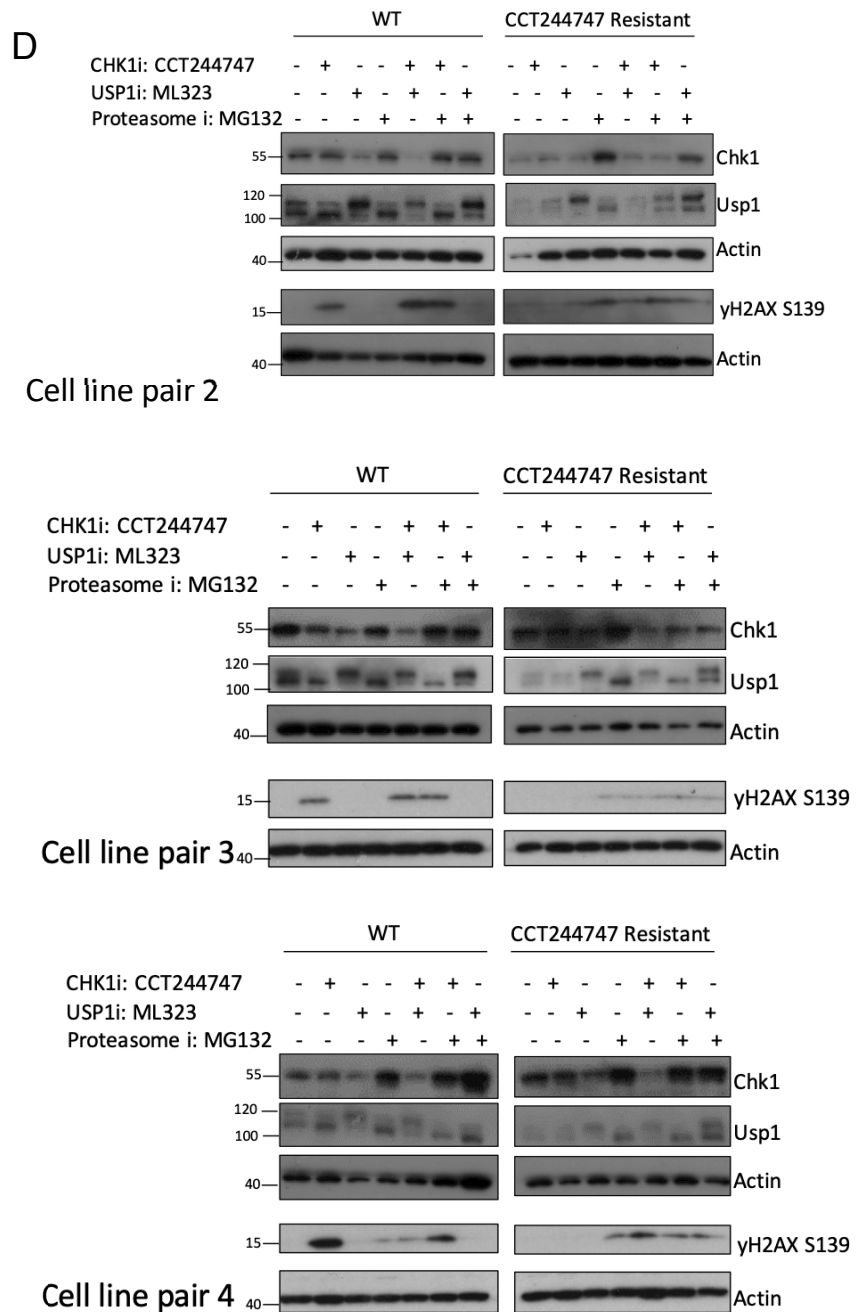

Supplement: bcj-2022-0102_supp.pdf [file bcj-2022-0102_supp.pdf]
