# Supplementary material for: Regulation of CHK1 inhibitor resistance by a c-Rel and USP1 dependent pathway
Source: Biochem J. 2022 Oct 14;479(19):2063–86. doi: 10.1042/BCJ20220102 (PMC9704646; doi:10.1042/BCJ20220102)
Supplement: Supplementary Material 3 [file BCJ-479-2063-s3.pdf]

## Sheet: Descripton
STRING interactions data based phosphorylated proteins identified from phospho proteomics analysis. String search performed using 'Homo Sapiens' as the species setting with either Medium or High interaction confidence levels as indicated. The analysis was performed using the setting where the first shell of interactors was limited to the query proteins only. No second shell of interactors was use…
Tab 1: Summary table showing the number of interactions seen under the Medium or High confidence settings both with and without the manual addition of CHK1 to the protein query list.
Tab 2: Analysis of STRING interactions between phospho proteins down regulated in REL-/- Eu-Myc lymphoma cells versus WT Eu-Myc lymphoma cells. Note CHK1 (Chek1) was manually added into the protein list in order to identify potential interactions. String search performed using 'Homo Sapiens' as the species setting and at Medium Confidence levels.
Tab 3: Analysis of STRING interactions between phospho proteins down regulated in REL-/- Eu-Myc lymphoma cells versus WT Eu-Myc lymphoma cells. CHK1 (Chek1) was NOT manually added into the protein list in order to identify potential interactions in this analysis. String search performed using 'Homo Sapiens' as the species setting and at Medium Confidence levels.
Tab 4: Analysis of STRING interactions between phospho proteins down regulated in REL-/- Eu-Myc lymphoma cells versus WT Eu-Myc lymphoma cells. Note CHK1 (Chek1) was manually added into the protein list in order to identify potential interactions. String search performed using 'Homo Sapiens' as the species setting and at High Confidence levels.
Tab 5: Analysis of STRING interactions between phospho proteins down regulated in REL-/- Eu-Myc lymphoma cells versus WT Eu-Myc lymphoma cells. CHK1 (Chek1) was NOT manually added into the protein list in order to identify potential interactions in this analysis. String search performed using 'Homo Sapiens' as the species setting and at High Confidence levels.

## Sheet: Summary table
	Medium Confidence	High Confidence	Number of proteins with interactions (Medium)	Number of proteins with interactions (High)
With CHK1	807	285	212	134
No CHK1	780	272	211	133
CHK1 interactions	27	13	N/A	N/A

## Sheet: DOWN in REL_+ CHK1_Medium
#node1	node2	node1_string_id	node2_string_id	neighborhood_on_chromosome	gene_fusion	phylogenetic_cooccurrence	homology	coexpression	experimentally_determined_interaction	database_annotated	automated_textmining	combined_score
ABCF1	NUFIP2	9606.ENSP00000313603	9606.ENSP00000225388	0	0	0	0	0.079	0	0.72	0.136	0.757
ABCF1	BTF3	9606.ENSP00000313603	9606.ENSP00000369965	0	0	0	0	0.11	0	0.54	0.043	0.574
ABCF1	LARP4B	9606.ENSP00000313603	9606.ENSP00000482767	0	0	0	0	0.1	0	0.9	0	0.906
ACIN1	SF1	9606.ENSP00000262710	9606.ENSP00000366604	0	0	0	0	0.162	0.27	0	0.101	0.402
ACIN1	BCLAF1	9606.ENSP00000262710	9606.ENSP00000435210	0	0	0	0	0.181	0	0	0.301	0.403
ACIN1	SRRT	9606.ENSP00000262710	9606.ENSP00000480421	0	0	0	0	0.26	0	0	0.234	0.41
ACIN1	SUMO1	9606.ENSP00000262710	9606.ENSP00000376077	0	0	0	0	0.146	0	0	0.379	0.447
ACIN1	THRAP3	9606.ENSP00000262710	9606.ENSP00000346634	0	0	0	0	0.105	0.129	0	0.348	0.447
ACIN1	CASC3	9606.ENSP00000262710	9606.ENSP00000264645	0	0	0	0	0.065	0	0	0.456	0.47
ACIN1	C17orf85	9606.ENSP00000262710	9606.ENSP00000373657	0	0	0	0	0.17	0.477	0	0.154	0.6
ACIN1	SAFB	9606.ENSP00000262710	9606.ENSP00000467423	0	0	0	0	0.287	0.414	0	0.372	0.715
ACIN1	SRRM1	9606.ENSP00000262710	9606.ENSP00000326261	0	0	0	0	0.318	0.39	0	0.447	0.75
ACIN1	ZC3H18	9606.ENSP00000262710	9606.ENSP00000416951	0	0	0	0	0.129	0.735	0	0	0.759
ACIN1	SRRM2	9606.ENSP00000262710	9606.ENSP00000301740	0	0	0	0	0.775	0.681	0	0.432	0.955
ADD1	ADD2	9606.ENSP00000264758	9606.ENSP00000264436	0	0	0.414	0.922	0.062	0.717	0.8	0.972	0.948
ADD1	DMTN	9606.ENSP00000264758	9606.ENSP00000427866	0	0	0	0	0.083	0.246	0.6	0.607	0.876
ADD2	HEMGN	9606.ENSP00000264436	9606.ENSP00000480020	0	0	0	0	0.063	0	0	0.486	0.497
ADD2	ANK1	9606.ENSP00000264436	9606.ENSP00000265709	0	0	0	0	0.137	0.056	0	0.489	0.547
ADD2	ADD1	9606.ENSP00000264436	9606.ENSP00000264758	0	0	0.414	0.922	0.062	0.717	0.8	0.972	0.948
ADD2	DMTN	9606.ENSP00000264436	9606.ENSP00000427866	0	0	0	0	0.065	0.394	0.6	0.817	0.952
AHCTF1	MCM2	9606.ENSP00000355465	9606.ENSP00000265056	0	0	0	0	0.072	0	0	0.786	0.793
AHCTF1	NUP35	9606.ENSP00000355465	9606.ENSP00000295119	0	0	0	0	0.081	0.39	0.6	0.826	0.955
AHCTF1	CDCA2	9606.ENSP00000355465	9606.ENSP00000328228	0	0	0	0	0.069	0	0	0.482	0.497
AHCTF1	GPATCH4	9606.ENSP00000355465	9606.ENSP00000396441	0	0	0	0	0.048	0	0	0.396	0.4
AHCTF1	INCENP	9606.ENSP00000355465	9606.ENSP00000378295	0	0	0	0	0.082	0	0	0.382	0.408
AHCTF1	TPR	9606.ENSP00000355465	9606.ENSP00000356448	0	0	0	0	0.586	0	0	0.719	0.879
AHSP	HEMGN	9606.ENSP00000307199	9606.ENSP00000480020	0	0	0	0	0.207	0	0	0.285	0.409
AHSP	GYPA	9606.ENSP00000307199	9606.ENSP00000354003	0	0	0	0	0.189	0	0	0.392	0.485
AHSP	DMTN	9606.ENSP00000307199	9606.ENSP00000427866	0	0	0	0	0.318	0	0	0.468	0.621
AHSP	BCL11A	9606.ENSP00000307199	9606.ENSP00000338774	0	0	0	0	0	0	0	0.682	0.682
AKAP12	SRRM2	9606.ENSP00000384537	9606.ENSP00000301740	0	0	0	0	0	0	0	0.508	0.508
AKAP12	AKAP13	9606.ENSP00000384537	9606.ENSP00000354718	0	0	0	0	0	0	0	0.758	0.759
AKAP13	SAMD14	9606.ENSP00000354718	9606.ENSP00000424474	0	0	0	0	0.062	0.074	0	0.448	0.479
AKAP13	AKAP12	9606.ENSP00000354718	9606.ENSP00000384537	0	0	0	0	0	0	0	0.758	0.759
AMMECR1	THOC2	9606.ENSP00000262844	9606.ENSP00000245838	0	0	0	0	0.558	0	0	0.228	0.644
ANK1	ADD2	9606.ENSP00000265709	9606.ENSP00000264436	0	0	0	0	0.137	0.056	0	0.489	0.547
ANK1	GYPA	9606.ENSP00000265709	9606.ENSP00000354003	0	0	0	0	0.099	0	0	0.427	0.462
ANK1	DMTN	9606.ENSP00000265709	9606.ENSP00000427866	0	0	0	0	0.117	0	0	0.507	0.546
ANKRD17	CEP85	9606.ENSP00000351416	9606.ENSP00000252992	0	0	0	0	0	0.406	0	0	0.406
ANKRD17	LARP1	9606.ENSP00000351416	9606.ENSP00000336721	0	0	0	0	0.121	0.076	0	0.333	0.411
ANKRD17	PRRC2C	9606.ENSP00000351416	9606.ENSP00000343629	0	0	0	0	0.327	0.421	0	0	0.593
ANKRD17	TNKS1BP1	9606.ENSP00000351416	9606.ENSP00000437271	0	0	0	0	0	0.408	0	0	0.408
ANLN	RAD51AP1	9606.ENSP00000265748	9606.ENSP00000228843	0	0	0	0	0.778	0	0	0.134	0.799
ANLN	SPECC1	9606.ENSP00000265748	9606.ENSP00000261503	0	0	0	0	0	0.444	0	0.062	0.456
ANLN	MCM2	9606.ENSP00000265748	9606.ENSP00000265056	0	0	0	0	0.523	0	0	0.201	0.603
ANLN	MDC1	9606.ENSP00000265748	9606.ENSP00000365588	0	0	0	0	0.097	0.391	0	0.063	0.44
ANLN	TICRR	9606.ENSP00000265748	9606.ENSP00000268138	0	0	0	0	0.329	0	0	0.241	0.468
ANLN	STMN1	9606.ENSP00000265748	9606.ENSP00000410452	0	0	0	0	0.186	0	0	0.413	0.502
ANLN	CDCA3	9606.ENSP00000265748	9606.ENSP00000442068	0	0	0	0	0.243	0	0	0.37	0.503
ANLN	TMPO	9606.ENSP00000265748	9606.ENSP00000266732	0	0	0	0	0.349	0.27	0	0.208	0.591
ANLN	MCM10	9606.ENSP00000265748	9606.ENSP00000418268	0	0	0	0	0.583	0	0	0.081	0.6
ANLN	BRCA1	9606.ENSP00000265748	9606.ENSP00000418960	0	0	0	0	0.3	0.391	0	0.143	0.603
ANLN	ERCC6L	9606.ENSP00000265748	9606.ENSP00000334675	0	0	0	0	0.561	0	0	0.155	0.613
ANLN	SKA3	9606.ENSP00000265748	9606.ENSP00000319417	0	0	0	0	0.543	0	0	0.217	0.627
ANLN	CHEK1	9606.ENSP00000265748	9606.ENSP00000388648	0	0	0	0	0.656	0	0	0.161	0.699
ANLN	CDCA2	9606.ENSP00000265748	9606.ENSP00000328228	0	0	0	0	0.568	0	0	0.345	0.705
ANLN	MKI67	9606.ENSP00000265748	9606.ENSP00000357643	0	0	0	0	0.59	0.27	0	0.287	0.768
ANLN	INCENP	9606.ENSP00000265748	9606.ENSP00000378295	0	0	0	0	0.589	0.27	0	0.566	0.858
ANLN	RRM2	9606.ENSP00000265748	9606.ENSP00000353770	0	0	0	0	0.794	0	0	0.369	0.865
ANLN	NUSAP1	9606.ENSP00000265748	9606.ENSP00000453403	0	0	0	0	0.811	0	0	0.363	0.874
ANLN	TPX2	9606.ENSP00000265748	9606.ENSP00000300403	0	0	0	0	0.839	0	0	0.482	0.913
ANLN	TOP2A	9606.ENSP00000265748	9606.ENSP00000411532	0	0	0	0	0.834	0.27	0	0.469	0.93
APC	CEP85	9606.ENSP00000257430	9606.ENSP00000252992	0	0	0	0	0	0.409	0	0	0.408
APC	KMT2D	9606.ENSP00000257430	9606.ENSP00000301067	0	0	0	0	0.062	0	0.65	0.084	0.673
APLF	MDC1	9606.ENSP00000307004	9606.ENSP00000365588	0	0	0	0	0	0	0	0.461	0.461
ARGLU1	FNBP4	9606.ENSP00000383059	9606.ENSP00000263773	0	0	0	0	0.46	0	0	0	0.46
ARGLU1	SRSF5	9606.ENSP00000383059	9606.ENSP00000452123	0	0	0	0	0.249	0.064	0	0.228	0.411
ARPP19	SMNDC1	9606.ENSP00000455625	9606.ENSP00000358616	0	0	0	0	0.112	0	0	0.672	0.697
ATF1	TCF12	9606.ENSP00000262053	9606.ENSP00000388940	0	0	0	0	0	0	0.6	0.102	0.625
ATF7	INCENP	9606.ENSP00000399465	9606.ENSP00000378295	0	0	0	0	0	0	0	0.41	0.41
ATF7	ATF7IP	9606.ENSP00000399465	9606.ENSP00000440440	0	0	0	0	0.059	0.173	0	0.64	0.696
ATF7IP	SUMO1	9606.ENSP00000440440	9606.ENSP00000376077	0	0	0	0	0	0.135	0	0.415	0.472
ATF7IP	ATF7	9606.ENSP00000440440	9606.ENSP00000399465	0	0	0	0	0.059	0.173	0	0.64	0.696
ATF7IP	MBD1	9606.ENSP00000440440	9606.ENSP00000468785	0	0	0	0	0	0.675	0	0.798	0.931
ATRX	RAD51AP1	9606.ENSP00000362441	9606.ENSP00000228843	0	0	0	0	0.062	0	0	0.493	0.504
ATRX	THOC2	9606.ENSP00000362441	9606.ENSP00000245838	0	0	0	0	0.683	0.077	0	0.186	0.741
ATRX	PPIG	9606.ENSP00000362441	9606.ENSP00000260970	0	0	0	0	0.254	0.077	0	0.697	0.773
ATRX	LIG1	9606.ENSP00000362441	9606.ENSP00000263274	0	0	0	0	0.063	0.102	0	0.507	0.549
ATRX	MCM2	9606.ENSP00000362441	9606.ENSP00000265056	0	0	0	0	0.083	0.149	0	0.335	0.436
ATRX	KMT2D	9606.ENSP00000362441	9606.ENSP00000301067	0	0	0	0	0.064	0.153	0	0.476	0.548
ATRX	BDP1	9606.ENSP00000362441	9606.ENSP00000351575	0	0	0	0	0.826	0.058	0	0.048	0.831
ATRX	TCF20	9606.ENSP00000362441	9606.ENSP00000352463	0	0	0	0	0.153	0.153	0	0.258	0.421
ATRX	TPR	9606.ENSP00000362441	9606.ENSP00000356448	0	0	0	0	0.819	0.057	0	0	0.822
ATRX	BCOR	9606.ENSP00000362441	9606.ENSP00000367705	0	0	0	0	0	0	0	0.414	0.414
ATRX	BCLAF1	9606.ENSP00000362441	9606.ENSP00000435210	0	0	0	0	0.182	0	0	0.338	0.435
ATRX	SUMO1	9606.ENSP00000362441	9606.ENSP00000376077	0	0	0	0	0.062	0.212	0	0.314	0.448
ATRX	TOP2A	9606.ENSP00000362441	9606.ENSP00000411532	0	0	0	0	0.167	0.164	0	0.359	0.515
ATRX	MDC1	9606.ENSP00000362441	9606.ENSP00000365588	0	0	0	0	0.063	0.164	0	0.466	0.545
ATRX	CHEK1	9606.ENSP00000362441	9606.ENSP00000388648	0	0	0	0	0.062	0.078	0	0.535	0.562
ATRX	SPEN	9606.ENSP00000362441	9606.ENSP00000364912	0	0	0	0	0.068	0	0	0.639	0.65
ATRX	BRCA1	9606.ENSP00000362441	9606.ENSP00000418960	0	0	0	0	0.062	0.056	0	0.771	0.78
ATXN2	NUFIP2	9606.ENSP00000366843	9606.ENSP00000225388	0	0	0	0	0.047	0.628	0	0.185	0.685
ATXN2	CASC3	9606.ENSP00000366843	9606.ENSP00000264645	0	0	0	0	0	0.411	0	0.205	0.512
ATXN2	PATL1	9606.ENSP00000366843	9606.ENSP00000300146	0	0	0	0	0.066	0	0	0.445	0.46
ATXN2	BIN1	9606.ENSP00000366843	9606.ENSP00000316779	0	0	0	0	0	0.424	0	0.054	0.432
ATXN2	LARP1	9606.ENSP00000366843	9606.ENSP00000336721	0	0	0	0	0.06	0.346	0	0.109	0.404
ATXN2	CAPRIN1	9606.ENSP00000366843	9606.ENSP00000340329	0	0	0	0	0.064	0.284	0	0.543	0.668
ATXN2	PRRC2B	9606.ENSP00000366843	9606.ENSP00000349856	0	0	0	0	0.089	0.375	0	0.086	0.434
ATXN2	TPR	9606.ENSP00000366843	9606.ENSP00000356448	0	0	0	0	0.354	0.139	0	0.36	0.612
ATXN2	YBX1	9606.ENSP00000366843	9606.ENSP00000361626	0	0	0	0	0	0.368	0	0.241	0.5
ATXN2	EIF4ENIF1	9606.ENSP00000366843	9606.ENSP00000380659	0	0	0	0	0.062	0.206	0	0.29	0.425
ATXN2	SYNJ1	9606.ENSP00000366843	9606.ENSP00000409667	0	0	0	0	0.063	0	0	0.486	0.498
BAG3	NUFIP2	9606.ENSP00000358081	9606.ENSP00000225388	0	0	0	0	0.06	0	0	0.569	0.578
BAG3	UBAP2L	9606.ENSP00000358081	9606.ENSP00000389445	0	0	0	0	0.1	0.281	0	0.147	0.4
BAG3	BCLAF1	9606.ENSP00000358081	9606.ENSP00000435210	0	0	0	0	0.061	0.27	0	0.451	0.591
BCL11A	TCF3	9606.ENSP00000338774	9606.ENSP00000262965	0	0	0	0	0	0.058	0	0.464	0.473
BCL11A	TAL1	9606.ENSP00000338774	9606.ENSP00000294339	0	0	0	0	0.063	0.066	0	0.591	0.611
BCL11A	AHSP	9606.ENSP00000338774	9606.ENSP00000307199	0	0	0	0	0	0	0	0.682	0.682
BCL11A	RERE	9606.ENSP00000338774	9606.ENSP00000338629	0	0	0	0	0	0.066	0	0.43	0.444
BCL11A	GYPA	9606.ENSP00000338774	9606.ENSP00000354003	0	0	0	0	0	0	0	0.408	0.408
BCL11A	BCL7A	9606.ENSP00000338774	9606.ENSP00000445868	0	0	0	0	0.062	0	0	0.429	0.441
BCL11A	RAD23A	9606.ENSP00000338774	9606.ENSP00000467024	0	0	0	0	0	0.077	0	0.434	0.455
BCL11A	BCL7B	9606.ENSP00000338774	9606.ENSP00000411073	0	0	0	0	0	0	0	0.458	0.458
BCL11A	SUMO1	9606.ENSP00000338774	9606.ENSP00000376077	0	0	0	0	0	0.143	0	0.408	0.471
BCL11A	TCF12	9606.ENSP00000338774	9606.ENSP00000388940	0	0	0	0	0.062	0.058	0	0.462	0.484
BCL11A	SOX6	9606.ENSP00000338774	9606.ENSP00000379644	0	0	0	0	0.066	0.101	0	0.917	0.925
BCL7A	BCL11A	9606.ENSP00000445868	9606.ENSP00000338774	0	0	0	0	0.062	0	0	0.429	0.441
BCL7B	BCL11A	9606.ENSP00000411073	9606.ENSP00000338774	0	0	0	0	0	0	0	0.458	0.458
BCLAF1	SRSF9	9606.ENSP00000435210	9606.ENSP00000229390	0	0	0	0	0.136	0.198	0	0.29	0.465
BCLAF1	THOC2	9606.ENSP00000435210	9606.ENSP00000245838	0	0	0	0	0.307	0.479	0	0	0.623
BCLAF1	ACIN1	9606.ENSP00000435210	9606.ENSP00000262710	0	0	0	0	0.181	0	0	0.301	0.403
BCLAF1	MED26	9606.ENSP00000435210	9606.ENSP00000263390	0	0	0	0	0.065	0	0.54	0	0.551
BCLAF1	PSME3	9606.ENSP00000435210	9606.ENSP00000293362	0	0	0	0	0.273	0.27	0	0.562	0.747
BCLAF1	HNRNPD	9606.ENSP00000435210	9606.ENSP00000313199	0	0	0	0	0.556	0	0	0.072	0.571
BCLAF1	SRRM1	9606.ENSP00000435210	9606.ENSP00000326261	0	0	0	0	0.214	0.075	0	0.274	0.427
BCLAF1	MED19	9606.ENSP00000435210	9606.ENSP00000337340	0	0	0	0	0	0	0.54	0	0.54
BCLAF1	THRAP3	9606.ENSP00000435210	9606.ENSP00000346634	0	0	0	0.806	0.228	0.843	0.54	0.959	0.95
BCLAF1	BAG3	9606.ENSP00000435210	9606.ENSP00000358081	0	0	0	0	0.061	0.27	0	0.451	0.591
BCLAF1	ZRANB2	9606.ENSP00000435210	9606.ENSP00000359958	0	0	0	0	0.34	0	0	0.422	0.603
BCLAF1	ATRX	9606.ENSP00000435210	9606.ENSP00000362441	0	0	0	0	0.182	0	0	0.338	0.435
BCLAF1	SRSF2	9606.ENSP00000435210	9606.ENSP00000376276	0	0	0	0	0.335	0	0	0.214	0.455
BCLAF1	ZC3H18	9606.ENSP00000435210	9606.ENSP00000416951	0	0	0	0	0.113	0.27	0	0.339	0.534
BCLAF1	BRCA1	9606.ENSP00000435210	9606.ENSP00000418960	0	0	0	0	0.062	0	0	0.973	0.973
BCLAF1	SAFB	9606.ENSP00000435210	9606.ENSP00000467423	0	0	0	0	0.304	0	0	0.174	0.4
BCLAF1	ZC3H11A	9606.ENSP00000435210	9606.ENSP00000438527	0	0	0	0	0.177	0.47	0	0	0.545
BCOR	KMT2D	9606.ENSP00000367705	9606.ENSP00000301067	0	0	0	0	0.062	0	0	0.529	0.54
BCOR	YAF2	9606.ENSP00000367705	9606.ENSP00000328004	0	0	0	0	0	0.898	0	0.682	0.966
BCOR	FIP1L1	9606.ENSP00000367705	9606.ENSP00000336752	0	0	0	0	0	0	0	0.514	0.514
BCOR	ATRX	9606.ENSP00000367705	9606.ENSP00000362441	0	0	0	0	0	0	0	0.414	0.414
BCOR	SRSF2	9606.ENSP00000367705	9606.ENSP00000376276	0	0	0	0	0	0	0	0.664	0.664
BCOR	RYBP	9606.ENSP00000367705	9606.ENSP00000419494	0	0	0	0	0	0.887	0	0.927	0.991
BDP1	RIF1	9606.ENSP00000351575	9606.ENSP00000243326	0	0	0	0	0.831	0	0	0	0.831
BDP1	TCEA1	9606.ENSP00000351575	9606.ENSP00000428426	0	0	0	0	0.062	0.212	0	0.37	0.493
BDP1	EPS15	9606.ENSP00000351575	9606.ENSP00000360798	0	0	0	0	0.089	0	0	0.472	0.498
BDP1	POLR3G	9606.ENSP00000351575	9606.ENSP00000382058	0	0	0	0	0	0	0.6	0.529	0.803
BDP1	ATRX	9606.ENSP00000351575	9606.ENSP00000362441	0	0	0	0	0.826	0.058	0	0.048	0.831
BIN1	SRSF9	9606.ENSP00000316779	9606.ENSP00000229390	0	0	0	0	0	0.086	0	0.445	0.471
BIN1	BIN2	9606.ENSP00000316779	9606.ENSP00000267012	0	0	0	0.831	0	0.74	0.9	0.878	0.976
BIN1	ATXN2	9606.ENSP00000316779	9606.ENSP00000366843	0	0	0	0	0	0.424	0	0.054	0.432
BIN1	EPS15	9606.ENSP00000316779	9606.ENSP00000360798	0	0	0	0	0.064	0.246	0.9	0.584	0.966
BIN1	SYNJ1	9606.ENSP00000316779	9606.ENSP00000409667	0	0	0	0	0.053	0.325	0.9	0.548	0.967
BIN2	BRCA1	9606.ENSP00000267012	9606.ENSP00000418960	0	0	0	0	0	0	0	0.449	0.449
BIN2	SASH3	9606.ENSP00000267012	9606.ENSP00000349359	0	0	0	0	0.35	0	0	0.22	0.471
BIN2	SYNJ1	9606.ENSP00000267012	9606.ENSP00000409667	0	0	0	0	0.053	0.104	0.9	0.146	0.917
BIN2	EPS15	9606.ENSP00000267012	9606.ENSP00000360798	0	0	0	0	0.064	0.246	0.9	0.251	0.94
BIN2	BIN1	9606.ENSP00000267012	9606.ENSP00000316779	0	0	0	0.831	0	0.74	0.9	0.878	0.976
BMP2K	EPS15	9606.ENSP00000334836	9606.ENSP00000360798	0	0	0	0	0.108	0.474	0	0.394	0.691
BOD1L1	SKA3	9606.ENSP00000040738	9606.ENSP00000319417	0	0	0	0	0	0	0.54	0.043	0.54
BOD1L1	MDC1	9606.ENSP00000040738	9606.ENSP00000365588	0	0	0	0	0.047	0.459	0	0.183	0.542
BRCA1	RAD51AP1	9606.ENSP00000418960	9606.ENSP00000228843	0	0	0	0	0.368	0	0.6	0.459	0.851
BRCA1	RIF1	9606.ENSP00000418960	9606.ENSP00000243326	0	0	0	0	0.092	0.405	0.65	0.298	0.849
BRCA1	LIG1	9606.ENSP00000418960	9606.ENSP00000263274	0	0	0	0	0.147	0	0	0.454	0.515
BRCA1	MCM2	9606.ENSP00000418960	9606.ENSP00000265056	0	0	0	0	0.327	0	0	0.406	0.583
BRCA1	ANLN	9606.ENSP00000418960	9606.ENSP00000265748	0	0	0	0	0.3	0.391	0	0.143	0.603
BRCA1	BIN2	9606.ENSP00000418960	9606.ENSP00000267012	0	0	0	0	0	0	0	0.449	0.449
BRCA1	TPX2	9606.ENSP00000418960	9606.ENSP00000300403	0	0	0	0	0.411	0.682	0	0.514	0.901
BRCA1	KMT2D	9606.ENSP00000418960	9606.ENSP00000301067	0	0	0	0	0.051	0.056	0	0.419	0.434
BRCA1	CLSPN	9606.ENSP00000418960	9606.ENSP00000312995	0	0	0	0	0.341	0.487	0.6	0.683	0.951
BRCA1	HNRNPD	9606.ENSP00000418960	9606.ENSP00000313199	0	0	0	0	0.062	0.44	0	0.18	0.531
BRCA1	RNF168	9606.ENSP00000418960	9606.ENSP00000320898	0	0	0	0	0.082	0.647	0.6	0.837	0.976
BRCA1	CDCA2	9606.ENSP00000418960	9606.ENSP00000328228	0	0	0	0	0.301	0.128	0	0.096	0.401
BRCA1	ERCC6L	9606.ENSP00000418960	9606.ENSP00000334675	0	0	0	0	0.287	0.056	0	0.28	0.474
BRCA1	THRAP3	9606.ENSP00000418960	9606.ENSP00000346634	0	0	0	0	0.062	0	0	0.477	0.488
BRCA1	HNRNPAB	9606.ENSP00000418960	9606.ENSP00000351108	0	0	0	0	0.08	0.405	0	0	0.429
BRCA1	RRM2	9606.ENSP00000418960	9606.ENSP00000353770	0	0	0	0	0.409	0	0	0.525	0.708
BRCA1	ZEB1	9606.ENSP00000418960	9606.ENSP00000354487	0	0	0	0	0	0	0	0.404	0.404
BRCA1	MKI67	9606.ENSP00000418960	9606.ENSP00000357643	0	0	0	0	0.389	0.128	0	0.422	0.665
BRCA1	ATRX	9606.ENSP00000418960	9606.ENSP00000362441	0	0	0	0	0.062	0.056	0	0.771	0.78
BRCA1	MDC1	9606.ENSP00000418960	9606.ENSP00000365588	0	0	0	0	0.062	0.873	0.9	0.935	0.999
BRCA1	LSP1	9606.ENSP00000418960	9606.ENSP00000371194	0	0	0	0	0	0	0	0.49	0.489
BRCA1	SUMO1	9606.ENSP00000418960	9606.ENSP00000376077	0	0	0	0	0.062	0.661	0.8	0.547	0.967
BRCA1	FOXO3	9606.ENSP00000418960	9606.ENSP00000385824	0	0	0	0	0	0.27	0	0.455	0.585
BRCA1	CHEK1	9606.ENSP00000418960	9606.ENSP00000388648	0	0	0	0	0.369	0.628	0.6	0.878	0.987
BRCA1	TOP2A	9606.ENSP00000418960	9606.ENSP00000411532	0	0	0	0	0.676	0.383	0	0.567	0.906
BRCA1	MCM10	9606.ENSP00000418960	9606.ENSP00000418268	0	0	0	0	0.567	0.459	0	0.324	0.827
BRCA1	NUSAP1	9606.ENSP00000418960	9606.ENSP00000453403	0	0	0	0	0.408	0	0	0.234	0.527
BRCA1	RNF4	9606.ENSP00000418960	9606.ENSP00000426503	0	0	0	0	0	0	0.9	0.469	0.944
BRCA1	BCLAF1	9606.ENSP00000418960	9606.ENSP00000435210	0	0	0	0	0.062	0	0	0.973	0.973
BRD8	DNTTIP2	9606.ENSP00000254900	9606.ENSP00000411010	0	0	0	0	0.064	0	0	0.421	0.434
BRD8	PRRC2B	9606.ENSP00000254900	9606.ENSP00000349856	0	0	0	0	0.064	0	0	0.44	0.454
BTF3	NUFIP2	9606.ENSP00000369965	9606.ENSP00000225388	0	0	0	0	0.087	0	0.54	0	0.562
BTF3	ABCF1	9606.ENSP00000369965	9606.ENSP00000313603	0	0	0	0	0.11	0	0.54	0.043	0.574
BTF3	RPLP2	9606.ENSP00000369965	9606.ENSP00000322419	0	0	0	0	0.595	0.567	0	0.101	0.828
BTF3	SERBP1	9606.ENSP00000369965	9606.ENSP00000360034	0	0	0	0	0.372	0.213	0	0	0.485
BTF3	YBX1	9606.ENSP00000369965	9606.ENSP00000361626	0	0	0	0	0.47	0.248	0	0.111	0.615
BTF3	LARP4B	9606.ENSP00000369965	9606.ENSP00000482767	0	0	0	0	0.087	0	0.54	0	0.562
BTF3	EEF1B2	9606.ENSP00000369965	9606.ENSP00000376056	0	0	0	0	0.62	0.247	0	0.184	0.746
BTF3	NACA	9606.ENSP00000369965	9606.ENSP00000448035	0	0	0	0	0.737	0.987	0.54	0.466	0.999
C11orf58	PTMA	9606.ENSP00000228136	9606.ENSP00000344547	0	0	0	0	0.157	0.272	0	0.522	0.681
C17orf49	TAF7	9606.ENSP00000448598	9606.ENSP00000312709	0	0	0	0	0	0	0.9	0	0.9
C17orf85	THOC2	9606.ENSP00000373657	9606.ENSP00000245838	0	0	0	0	0.145	0.673	0	0.54	0.86
C17orf85	WBP11	9606.ENSP00000373657	9606.ENSP00000261167	0	0	0	0	0.113	0	0	0.619	0.648
C17orf85	ACIN1	9606.ENSP00000373657	9606.ENSP00000262710	0	0	0	0	0.17	0.477	0	0.154	0.6
C17orf85	PHAX	9606.ENSP00000373657	9606.ENSP00000297540	0	0	0	0	0.107	0.27	0	0.564	0.691
C17orf85	ZC3H11A	9606.ENSP00000373657	9606.ENSP00000438527	0	0	0	0	0.109	0.679	0	0	0.701
C17orf85	SRRT	9606.ENSP00000373657	9606.ENSP00000480421	0	0	0	0	0.142	0.477	0	0.727	0.867
CAPRIN1	NUFIP2	9606.ENSP00000340329	9606.ENSP00000225388	0	0	0	0	0.085	0.402	0	0.396	0.641
CAPRIN1	RBM3	9606.ENSP00000340329	9606.ENSP00000365950	0	0	0	0	0.112	0.322	0	0.097	0.409
CAPRIN1	PRRC2C	9606.ENSP00000340329	9606.ENSP00000343629	0	0	0	0	0.111	0.367	0	0	0.413
CAPRIN1	EIF4B	9606.ENSP00000340329	9606.ENSP00000388806	0	0	0	0	0.141	0.108	0	0.299	0.416
CAPRIN1	LARP4B	9606.ENSP00000340329	9606.ENSP00000482767	0	0	0	0	0.061	0.419	0	0.048	0.435
CAPRIN1	UBAP2L	9606.ENSP00000340329	9606.ENSP00000389445	0	0	0	0	0.239	0.242	0	0.417	0.634
CAPRIN1	ATXN2	9606.ENSP00000340329	9606.ENSP00000366843	0	0	0	0	0.064	0.284	0	0.543	0.668
CAPRIN1	YBX1	9606.ENSP00000340329	9606.ENSP00000361626	0	0	0	0	0.215	0.27	0	0.492	0.684
CASC3	SRSF9	9606.ENSP00000264645	9606.ENSP00000229390	0	0	0	0	0.056	0.7	0.6	0.368	0.918
CASC3	THOC2	9606.ENSP00000264645	9606.ENSP00000245838	0	0	0	0	0.062	0	0.6	0.064	0.618
CASC3	PPIG	9606.ENSP00000264645	9606.ENSP00000260970	0	0	0	0	0	0.8	0	0.043	0.8
CASC3	ACIN1	9606.ENSP00000264645	9606.ENSP00000262710	0	0	0	0	0.065	0	0	0.456	0.47
CASC3	THRAP3	9606.ENSP00000264645	9606.ENSP00000346634	0	0	0	0	0.065	0.27	0	0.301	0.481
CASC3	ZRANB2	9606.ENSP00000264645	9606.ENSP00000359958	0	0	0	0	0	0	0	0.508	0.508
CASC3	ATXN2	9606.ENSP00000264645	9606.ENSP00000366843	0	0	0	0	0	0.411	0	0.205	0.512
CASC3	NUP35	9606.ENSP00000264645	9606.ENSP00000295119	0	0	0	0	0	0	0.6	0	0.6
CASC3	FIP1L1	9606.ENSP00000264645	9606.ENSP00000336752	0	0	0	0	0	0	0.6	0	0.6
CASC3	TPR	9606.ENSP00000264645	9606.ENSP00000356448	0	0	0	0	0.082	0	0.6	0	0.617
CASC3	SRSF5	9606.ENSP00000264645	9606.ENSP00000452123	0	0	0	0	0.062	0.185	0.6	0.101	0.688
CASC3	SRSF2	9606.ENSP00000264645	9606.ENSP00000376276	0	0	0	0	0.063	0	0.6	0.329	0.726
CASC3	ZC3H11A	9606.ENSP00000264645	9606.ENSP00000438527	0	0	0	0	0	0	0.6	0.452	0.771
CASC3	SRRM1	9606.ENSP00000264645	9606.ENSP00000326261	0	0	0	0	0.064	0	0.6	0.531	0.809
CASC3	SRRM2	9606.ENSP00000264645	9606.ENSP00000301740	0	0	0	0	0.065	0.8	0	0.367	0.871
CASC3	CWC25	9606.ENSP00000264645	9606.ENSP00000478070	0	0	0	0	0	0.8	0.9	0.055	0.979
CAST	SF1	9606.ENSP00000379157	9606.ENSP00000366604	0	0	0	0	0	0	0	0.439	0.439
CAST	LSP1	9606.ENSP00000379157	9606.ENSP00000371194	0	0	0	0	0	0	0	0.539	0.539
CCDC12	SDE2	9606.ENSP00000292314	9606.ENSP00000272091	0	0	0	0	0	0.582	0	0	0.582
CCDC12	SRRM1	9606.ENSP00000292314	9606.ENSP00000326261	0	0	0	0	0.065	0	0	0.422	0.436
CCDC86	YBX3	9606.ENSP00000227520	9606.ENSP00000228251	0	0	0	0	0	0	0	0.406	0.406
CCDC86	PRRC2A	9606.ENSP00000227520	9606.ENSP00000365201	0	0	0	0	0.064	0	0	0.535	0.546
CCDC86	TCOF1	9606.ENSP00000227520	9606.ENSP00000367028	0	0	0	0	0.131	0	0	0.622	0.658
CDCA2	RAD51AP1	9606.ENSP00000328228	9606.ENSP00000228843	0	0	0	0	0.561	0	0	0.203	0.635
CDCA2	MCM2	9606.ENSP00000328228	9606.ENSP00000265056	0	0	0	0	0.383	0	0	0.205	0.489
CDCA2	ANLN	9606.ENSP00000328228	9606.ENSP00000265748	0	0	0	0	0.568	0	0	0.345	0.705
CDCA2	TICRR	9606.ENSP00000328228	9606.ENSP00000268138	0	0	0	0	0.554	0	0	0.159	0.609
CDCA2	TPX2	9606.ENSP00000328228	9606.ENSP00000300403	0	0	0	0	0.594	0	0	0.216	0.668
CDCA2	CLSPN	9606.ENSP00000328228	9606.ENSP00000312995	0	0	0	0	0.467	0	0	0.17	0.539
CDCA2	SKA3	9606.ENSP00000328228	9606.ENSP00000319417	0	0	0	0	0.594	0	0	0.422	0.756
CDCA2	BRCA1	9606.ENSP00000328228	9606.ENSP00000418960	0	0	0	0	0.301	0.128	0	0.096	0.401
CDCA2	ERCC6L	9606.ENSP00000328228	9606.ENSP00000334675	0	0	0	0	0.384	0	0	0.096	0.42
CDCA2	AHCTF1	9606.ENSP00000328228	9606.ENSP00000355465	0	0	0	0	0.069	0	0	0.482	0.497
CDCA2	INCENP	9606.ENSP00000328228	9606.ENSP00000378295	0	0	0	0	0.331	0	0	0.436	0.607
CDCA2	CHEK1	9606.ENSP00000328228	9606.ENSP00000388648	0	0	0	0	0.542	0	0	0.19	0.614
CDCA2	RRM2	9606.ENSP00000328228	9606.ENSP00000353770	0	0	0	0	0.592	0	0	0.112	0.622
CDCA2	MKI67	9606.ENSP00000328228	9606.ENSP00000357643	0	0	0	0.541	0.61	0	0	0.255	0.65
CDCA2	MCM10	9606.ENSP00000328228	9606.ENSP00000418268	0	0	0	0	0.55	0	0	0.39	0.714
CDCA2	TOP2A	9606.ENSP00000328228	9606.ENSP00000411532	0	0	0	0	0.652	0	0	0.266	0.734
CDCA2	NUSAP1	9606.ENSP00000328228	9606.ENSP00000453403	0	0	0	0	0.702	0	0	0.403	0.814
CDCA2	CDCA3	9606.ENSP00000328228	9606.ENSP00000442068	0	0	0	0	0.557	0	0	0.609	0.819
CDCA3	RAD51AP1	9606.ENSP00000442068	9606.ENSP00000228843	0	0	0	0	0.34	0	0	0.292	0.513
CDCA3	ANLN	9606.ENSP00000442068	9606.ENSP00000265748	0	0	0	0	0.243	0	0	0.37	0.503
CDCA3	TPX2	9606.ENSP00000442068	9606.ENSP00000300403	0	0	0	0	0.871	0	0	0.345	0.912
CDCA3	SKA3	9606.ENSP00000442068	9606.ENSP00000319417	0	0	0	0	0.745	0	0	0.113	0.764
CDCA3	CDCA2	9606.ENSP00000442068	9606.ENSP00000328228	0	0	0	0	0.557	0	0	0.609	0.819
CDCA3	RRM2	9606.ENSP00000442068	9606.ENSP00000353770	0	0	0	0	0.861	0	0	0.282	0.896
CDCA3	MKI67	9606.ENSP00000442068	9606.ENSP00000357643	0	0	0	0	0.728	0	0	0.364	0.82
CDCA3	INCENP	9606.ENSP00000442068	9606.ENSP00000378295	0	0	0	0	0.655	0	0	0.082	0.67
CDCA3	TOP2B	9606.ENSP00000442068	9606.ENSP00000396704	0	0	0	0	0.456	0	0	0.099	0.488
CDCA3	TOP2A	9606.ENSP00000442068	9606.ENSP00000411532	0	0	0	0	0.943	0	0	0.464	0.968
CDCA3	MCM10	9606.ENSP00000442068	9606.ENSP00000418268	0	0	0	0	0.224	0	0	0.378	0.496
CDCA3	NUSAP1	9606.ENSP00000442068	9606.ENSP00000453403	0	0	0	0	0.883	0	0	0.511	0.94
CDK13	SPEN	9606.ENSP00000181839	9606.ENSP00000364912	0	0	0	0	0.065	0.369	0	0.101	0.423
CDK13	THOC2	9606.ENSP00000181839	9606.ENSP00000245838	0	0	0	0	0.123	0.346	0	0.14	0.463
CDK13	KMT2D	9606.ENSP00000181839	9606.ENSP00000301067	0	0	0	0	0.063	0.15	0	0.382	0.465
CDK13	HEXIM1	9606.ENSP00000181839	9606.ENSP00000328773	0	0	0	0	0.105	0.27	0	0.295	0.499
CENPC	RNF4	9606.ENSP00000273853	9606.ENSP00000426503	0	0	0	0	0	0.27	0	0.22	0.406
CENPC	SKA3	9606.ENSP00000273853	9606.ENSP00000319417	0	0	0	0	0.122	0	0	0.373	0.426
CENPC	SON	9606.ENSP00000273853	9606.ENSP00000348984	0	0	0	0	0.059	0.182	0	0.411	0.507
CENPC	INCENP	9606.ENSP00000273853	9606.ENSP00000378295	0	0	0	0	0.065	0.161	0	0.717	0.758
CEP85	ANKRD17	9606.ENSP00000252992	9606.ENSP00000351416	0	0	0	0	0	0.406	0	0	0.406
CEP85	APC	9606.ENSP00000252992	9606.ENSP00000257430	0	0	0	0	0	0.409	0	0	0.408
CEP85	TNKS1BP1	9606.ENSP00000252992	9606.ENSP00000437271	0	0	0	0	0	0.413	0	0	0.412
CEP85	UBAP2L	9606.ENSP00000252992	9606.ENSP00000389445	0	0	0	0	0	0.249	0	0.28	0.436
CFDP1	SMNDC1	9606.ENSP00000283882	9606.ENSP00000358616	0	0	0	0	0.761	0	0	0	0.761
CHEK1	RAD51AP1	9606.ENSP00000388648	9606.ENSP00000228843	0	0	0	0	0.767	0	0	0.287	0.827
CHEK1	LIG1	9606.ENSP00000388648	9606.ENSP00000263274	0	0	0	0	0.254	0.788	0	0.726	0.953
CHEK1	MCM2	9606.ENSP00000388648	9606.ENSP00000265056	0	0	0	0	0.734	0.4	0.65	0.839	0.989
CHEK1	ANLN	9606.ENSP00000388648	9606.ENSP00000265748	0	0	0	0	0.656	0	0	0.161	0.699
CHEK1	TMPO	9606.ENSP00000388648	9606.ENSP00000266732	0	0	0	0	0.402	0	0	0.043	0.403
CHEK1	TICRR	9606.ENSP00000388648	9606.ENSP00000268138	0	0	0	0	0.394	0	0	0.847	0.903
CHEK1	TPX2	9606.ENSP00000388648	9606.ENSP00000300403	0	0	0	0	0.787	0	0	0.194	0.821
CHEK1	CLSPN	9606.ENSP00000388648	9606.ENSP00000312995	0	0	0	0	0.329	0.835	0.9	0.994	0.999
CHEK1	HNRNPD	9606.ENSP00000388648	9606.ENSP00000313199	0	0	0	0	0	0.684	0	0.113	0.707
CHEK1	SKA3	9606.ENSP00000388648	9606.ENSP00000319417	0	0	0	0	0.565	0	0	0.06	0.574
CHEK1	RNF168	9606.ENSP00000388648	9606.ENSP00000320898	0	0	0	0	0.108	0	0	0.525	0.559
CHEK1	CDCA2	9606.ENSP00000388648	9606.ENSP00000328228	0	0	0	0	0.542	0	0	0.19	0.614
CHEK1	ERCC6L	9606.ENSP00000388648	9606.ENSP00000334675	0	0	0	0	0.41	0.163	0	0.324	0.637
CHEK1	RRM2	9606.ENSP00000388648	9606.ENSP00000353770	0	0	0	0	0.8	0.137	0	0.649	0.934
CHEK1	ZEB1	9606.ENSP00000388648	9606.ENSP00000354487	0	0	0	0	0	0.27	0	0.294	0.462
CHEK1	MKI67	9606.ENSP00000388648	9606.ENSP00000357643	0	0	0	0	0.564	0	0	0.301	0.683
CHEK1	ATRX	9606.ENSP00000388648	9606.ENSP00000362441	0	0	0	0	0.062	0.078	0	0.535	0.562
CHEK1	MDC1	9606.ENSP00000388648	9606.ENSP00000365588	0	0	0	0	0.081	0.154	0.9	0.793	0.981
CHEK1	SUMO1	9606.ENSP00000388648	9606.ENSP00000376077	0	0	0	0	0	0.212	0	0.301	0.425
CHEK1	INCENP	9606.ENSP00000388648	9606.ENSP00000378295	0	0	0	0	0.198	0	0	0.387	0.488
CHEK1	RAD23A	9606.ENSP00000388648	9606.ENSP00000467024	0	0	0	0	0	0.27	0	0.238	0.42
CHEK1	TOP2B	9606.ENSP00000388648	9606.ENSP00000396704	0	0	0	0	0.1	0.137	0	0.513	0.589
CHEK1	SLBP	9606.ENSP00000388648	9606.ENSP00000417686	0	0	0	0	0.613	0	0	0.196	0.676
CHEK1	NUSAP1	9606.ENSP00000388648	9606.ENSP00000453403	0	0	0	0	0.821	0	0	0.246	0.859
CHEK1	TOP2A	9606.ENSP00000388648	9606.ENSP00000411532	0	0	0	0	0.803	0.205	0	0.678	0.945
CHEK1	MCM10	9606.ENSP00000388648	9606.ENSP00000418268	0	0	0	0	0.794	0	0.65	0.754	0.98
CHEK1	BRCA1	9606.ENSP00000388648	9606.ENSP00000418960	0	0	0	0	0.369	0.628	0.6	0.878	0.987
CLSPN	RAD51AP1	9606.ENSP00000312995	9606.ENSP00000228843	0	0	0	0	0.451	0	0	0.19	0.536
CLSPN	LIG1	9606.ENSP00000312995	9606.ENSP00000263274	0	0	0	0	0.398	0	0	0.343	0.588
CLSPN	MCM2	9606.ENSP00000312995	9606.ENSP00000265056	0	0	0	0	0.576	0	0.6	0.714	0.947
CLSPN	TICRR	9606.ENSP00000312995	9606.ENSP00000268138	0	0	0	0	0.279	0	0	0.506	0.628
CLSPN	TPX2	9606.ENSP00000312995	9606.ENSP00000300403	0	0	0	0	0.424	0	0	0.243	0.545
CLSPN	MAP2	9606.ENSP00000312995	9606.ENSP00000353508	0	0	0	0	0	0	0	0.445	0.445
CLSPN	ERCC6L	9606.ENSP00000312995	9606.ENSP00000334675	0	0	0	0	0.326	0.132	0	0.213	0.499
CLSPN	NUSAP1	9606.ENSP00000312995	9606.ENSP00000453403	0	0	0	0	0.386	0	0	0.22	0.501
CLSPN	RNF168	9606.ENSP00000312995	9606.ENSP00000320898	0	0	0	0	0.085	0	0	0.478	0.503
CLSPN	CDCA2	9606.ENSP00000312995	9606.ENSP00000328228	0	0	0	0	0.467	0	0	0.17	0.539
CLSPN	RRM2	9606.ENSP00000312995	9606.ENSP00000353770	0	0	0	0	0.441	0	0	0.294	0.589
CLSPN	MDC1	9606.ENSP00000312995	9606.ENSP00000365588	0	0	0	0	0.082	0	0	0.621	0.638
CLSPN	MKI67	9606.ENSP00000312995	9606.ENSP00000357643	0	0	0	0	0.659	0	0	0.083	0.674
CLSPN	TOP2A	9606.ENSP00000312995	9606.ENSP00000411532	0	0	0	0	0.759	0	0	0.449	0.862
CLSPN	BRCA1	9606.ENSP00000312995	9606.ENSP00000418960	0	0	0	0	0.341	0.487	0.6	0.683	0.951
CLSPN	MCM10	9606.ENSP00000312995	9606.ENSP00000418268	0	0	0	0	0.628	0	0.6	0.719	0.954
CLSPN	CHEK1	9606.ENSP00000312995	9606.ENSP00000388648	0	0	0	0	0.329	0.835	0.9	0.994	0.999
CPEB4	EIF4ENIF1	9606.ENSP00000265085	9606.ENSP00000380659	0	0	0	0	0.064	0.338	0	0.377	0.58
CPEB4	YBX1	9606.ENSP00000265085	9606.ENSP00000361626	0	0	0	0	0.062	0.149	0.54	0.076	0.615
CWC25	SNRPC	9606.ENSP00000478070	9606.ENSP00000244520	0	0	0	0	0	0.056	0	0.521	0.529
CWC25	PPIG	9606.ENSP00000478070	9606.ENSP00000260970	0	0	0	0	0.085	0.8	0	0.087	0.818
CWC25	CASC3	9606.ENSP00000478070	9606.ENSP00000264645	0	0	0	0	0	0.8	0.9	0.055	0.979
CWC25	SDE2	9606.ENSP00000478070	9606.ENSP00000272091	0	0	0	0	0.077	0.59	0	0.666	0.862
CWC25	SRRM2	9606.ENSP00000478070	9606.ENSP00000301740	0	0	0	0	0.084	0.868	0	0.734	0.965
CWC25	SRRM1	9606.ENSP00000478070	9606.ENSP00000326261	0	0	0	0	0.138	0	0	0.375	0.438
CWC25	MYB	9606.ENSP00000478070	9606.ENSP00000339992	0	0	0	0	0.066	0.369	0	0.144	0.451
CWC25	SF1	9606.ENSP00000478070	9606.ENSP00000366604	0	0	0	0	0.064	0.057	0	0.387	0.411
CXCR4	SPN	9606.ENSP00000386884	9606.ENSP00000353238	0	0	0	0	0.091	0	0	0.458	0.487
CXCR4	ZEB1	9606.ENSP00000386884	9606.ENSP00000354487	0	0	0	0	0	0	0	0.422	0.422
CXCR4	MKI67	9606.ENSP00000386884	9606.ENSP00000357643	0	0	0	0	0.062	0	0	0.39	0.404
CXCR4	PSIP1	9606.ENSP00000386884	9606.ENSP00000370109	0	0	0	0	0	0.209	0	0.345	0.459
DDX21	GLTSCR2	9606.ENSP00000346120	9606.ENSP00000246802	0	0	0	0	0.839	0.059	0	0.093	0.85
DDX21	ZC3H13	9606.ENSP00000346120	9606.ENSP00000282007	0	0	0	0	0.382	0.213	0	0.101	0.525
DDX21	HEXIM1	9606.ENSP00000346120	9606.ENSP00000328773	0	0	0	0	0.087	0.486	0	0.403	0.695
DDX21	SERBP1	9606.ENSP00000346120	9606.ENSP00000360034	0	0	0	0	0.261	0.164	0	0.137	0.421
DDX21	TOP2A	9606.ENSP00000346120	9606.ENSP00000411532	0.042	0	0	0	0.158	0.281	0	0.17	0.455
DDX21	GPATCH4	9606.ENSP00000346120	9606.ENSP00000396441	0	0	0	0	0.29	0.246	0	0.072	0.46
DDX21	RRP15	9606.ENSP00000346120	9606.ENSP00000355899	0	0	0	0	0.361	0.16	0	0.101	0.475
DDX21	NOP14	9606.ENSP00000346120	9606.ENSP00000405068	0	0	0	0	0.512	0.153	0	0.148	0.617
DDX21	DKC1	9606.ENSP00000346120	9606.ENSP00000358563	0.051	0	0	0	0.302	0.406	0	0.243	0.663
DDX21	YBX1	9606.ENSP00000346120	9606.ENSP00000361626	0.046	0	0	0	0.122	0.551	0	0.249	0.68
DDX21	FTSJ3	9606.ENSP00000346120	9606.ENSP00000396673	0	0	0	0	0.52	0.351	0	0.108	0.698
DDX21	SRSF2	9606.ENSP00000346120	9606.ENSP00000376276	0	0	0	0	0.312	0	0	0.609	0.719
DDX21	NOLC1	9606.ENSP00000346120	9606.ENSP00000385410	0	0	0	0	0.611	0.086	0	0.287	0.724
DDX21	GNL3	9606.ENSP00000346120	9606.ENSP00000395772	0	0	0	0	0.559	0.165	0.8	0.356	0.946
DKC1	GLTSCR2	9606.ENSP00000358563	9606.ENSP00000246802	0	0	0	0	0.518	0.769	0	0.365	0.923
DKC1	PSME3	9606.ENSP00000358563	9606.ENSP00000293362	0	0	0	0	0.823	0	0	0	0.823
DKC1	PHAX	9606.ENSP00000358563	9606.ENSP00000297540	0	0	0	0	0.069	0	0	0.536	0.549
DKC1	RPLP2	9606.ENSP00000358563	9606.ENSP00000322419	0	0	0	0	0.184	0.252	0	0.107	0.407
DKC1	LARP1	9606.ENSP00000358563	9606.ENSP00000336721	0	0	0	0	0.196	0.274	0	0.063	0.405
DKC1	DDX21	9606.ENSP00000358563	9606.ENSP00000346120	0.051	0	0	0	0.302	0.406	0	0.243	0.663
DKC1	RRP15	9606.ENSP00000358563	9606.ENSP00000355899	0	0	0	0	0.674	0	0	0.044	0.675
DKC1	SERBP1	9606.ENSP00000358563	9606.ENSP00000360034	0	0	0	0	0.238	0.27	0	0	0.42
DKC1	TOP2B	9606.ENSP00000358563	9606.ENSP00000396704	0.12	0	0	0	0.065	0.346	0	0.097	0.449
DKC1	TOP2A	9606.ENSP00000358563	9606.ENSP00000411532	0.12	0	0	0	0.16	0.346	0	0.119	0.517
DKC1	TCOF1	9606.ENSP00000358563	9606.ENSP00000367028	0	0	0	0	0.135	0.27	0	0.453	0.624
DKC1	DNTTIP2	9606.ENSP00000358563	9606.ENSP00000411010	0	0	0	0	0.656	0	0	0	0.656
DKC1	NOL7	9606.ENSP00000358563	9606.ENSP00000405674	0	0	0	0	0.765	0	0	0	0.765
DKC1	NOP14	9606.ENSP00000358563	9606.ENSP00000405068	0	0	0	0	0.819	0	0	0.167	0.843
DKC1	EIF4B	9606.ENSP00000358563	9606.ENSP00000388806	0	0	0	0	0.828	0.092	0	0.119	0.851
DKC1	FTSJ3	9606.ENSP00000358563	9606.ENSP00000396673	0.074	0	0	0	0.861	0.358	0	0.254	0.93
DKC1	GNL3	9606.ENSP00000358563	9606.ENSP00000395772	0	0	0	0	0.913	0.817	0	0.231	0.986
DKC1	NOLC1	9606.ENSP00000358563	9606.ENSP00000385410	0	0	0	0	0.862	0.6	0.36	0.944	0.997
DMTN	ADD2	9606.ENSP00000427866	9606.ENSP00000264436	0	0	0	0	0.065	0.394	0.6	0.817	0.952
DMTN	ADD1	9606.ENSP00000427866	9606.ENSP00000264758	0	0	0	0	0.083	0.246	0.6	0.607	0.876
DMTN	ANK1	9606.ENSP00000427866	9606.ENSP00000265709	0	0	0	0	0.117	0	0	0.507	0.546
DMTN	AHSP	9606.ENSP00000427866	9606.ENSP00000307199	0	0	0	0	0.318	0	0	0.468	0.621
DMTN	GYPA	9606.ENSP00000427866	9606.ENSP00000354003	0	0	0	0	0.062	0	0	0.425	0.437
DNTTIP2	GLTSCR2	9606.ENSP00000411010	9606.ENSP00000246802	0	0	0	0	0.81	0	0	0.151	0.832
DNTTIP2	BRD8	9606.ENSP00000411010	9606.ENSP00000254900	0	0	0	0	0.064	0	0	0.421	0.434
DNTTIP2	PSME3	9606.ENSP00000411010	9606.ENSP00000293362	0	0	0	0	0.48	0	0	0	0.48
DNTTIP2	RRP15	9606.ENSP00000411010	9606.ENSP00000355899	0	0	0	0	0.857	0	0	0	0.857
DNTTIP2	DKC1	9606.ENSP00000411010	9606.ENSP00000358563	0	0	0	0	0.656	0	0	0	0.656
DNTTIP2	GNL3	9606.ENSP00000411010	9606.ENSP00000395772	0	0	0	0	0.515	0	0	0	0.515
DNTTIP2	FTSJ3	9606.ENSP00000411010	9606.ENSP00000396673	0	0	0	0	0.658	0	0	0	0.658
DNTTIP2	NOP14	9606.ENSP00000411010	9606.ENSP00000405068	0	0	0	0	0.45	0.798	0	0.451	0.933
EAF1	MED26	9606.ENSP00000380054	9606.ENSP00000263390	0	0	0	0	0	0.289	0	0.435	0.582
EAF1	PSME3	9606.ENSP00000380054	9606.ENSP00000293362	0	0	0	0	0	0.457	0	0	0.457
EAF1	GTF2F1	9606.ENSP00000380054	9606.ENSP00000377969	0	0	0	0	0.063	0.227	0.6	0	0.684
EAF1	TCEA1	9606.ENSP00000380054	9606.ENSP00000428426	0	0	0	0	0.062	0.113	0.8	0.226	0.854
EEF1B2	SRSF9	9606.ENSP00000376056	9606.ENSP00000229390	0	0	0	0	0.148	0.271	0	0.113	0.401
EEF1B2	GLTSCR2	9606.ENSP00000376056	9606.ENSP00000246802	0	0	0	0	0.163	0	0	0.322	0.409
EEF1B2	RPLP2	9606.ENSP00000376056	9606.ENSP00000322419	0.045	0	0	0	0.95	0.895	0	0.412	0.996
EEF1B2	BTF3	9606.ENSP00000376056	9606.ENSP00000369965	0	0	0	0	0.62	0.247	0	0.184	0.746
EEF1B2	GTF2F1	9606.ENSP00000376056	9606.ENSP00000377969	0	0	0	0	0	0.613	0	0	0.613
EEF1B2	NACA	9606.ENSP00000376056	9606.ENSP00000448035	0	0	0	0	0.654	0.056	0	0.415	0.792
EIF4B	LARP1	9606.ENSP00000388806	9606.ENSP00000336721	0	0	0	0	0.115	0.057	0	0.52	0.565
EIF4B	CAPRIN1	9606.ENSP00000388806	9606.ENSP00000340329	0	0	0	0	0.141	0.108	0	0.299	0.416
EIF4B	EIF4EBP1	9606.ENSP00000388806	9606.ENSP00000340691	0	0	0	0	0.062	0	0	0.762	0.768
EIF4B	DKC1	9606.ENSP00000388806	9606.ENSP00000358563	0	0	0	0	0.828	0.092	0	0.119	0.851
EIF4B	SF1	9606.ENSP00000388806	9606.ENSP00000366604	0	0	0	0	0.102	0.452	0	0.11	0.524
EIF4B	SRSF5	9606.ENSP00000388806	9606.ENSP00000452123	0	0	0	0	0.226	0.213	0	0.111	0.411
EIF4B	NOP14	9606.ENSP00000388806	9606.ENSP00000405068	0	0	0	0	0.458	0	0	0.067	0.472
EIF4B	GNL3	9606.ENSP00000388806	9606.ENSP00000395772	0	0	0	0	0.701	0	0	0.079	0.712
EIF4B	TNKS1BP1	9606.ENSP00000388806	9606.ENSP00000437271	0	0	0	0	0	0	0.9	0	0.9
EIF4EBP1	MKI67	9606.ENSP00000340691	9606.ENSP00000357643	0	0	0	0	0.098	0	0	0.4	0.435
EIF4EBP1	IRS2	9606.ENSP00000340691	9606.ENSP00000365016	0	0	0	0	0	0	0	0.468	0.468
EIF4EBP1	FOXO3	9606.ENSP00000340691	9606.ENSP00000385824	0	0	0	0	0	0.06	0	0.626	0.634
EIF4EBP1	EIF4B	9606.ENSP00000340691	9606.ENSP00000388806	0	0	0	0	0.062	0	0	0.762	0.768
EIF4ENIF1	CPEB4	9606.ENSP00000380659	9606.ENSP00000265085	0	0	0	0	0.064	0.338	0	0.377	0.58
EIF4ENIF1	PATL1	9606.ENSP00000380659	9606.ENSP00000300146	0	0	0	0	0.096	0.258	0	0.759	0.824
EIF4ENIF1	LARP1	9606.ENSP00000380659	9606.ENSP00000336721	0	0	0	0	0.062	0	0	0.434	0.446
EIF4ENIF1	ATXN2	9606.ENSP00000380659	9606.ENSP00000366843	0	0	0	0	0.062	0.206	0	0.29	0.425
EIF4ENIF1	PDLIM5	9606.ENSP00000380659	9606.ENSP00000480359	0	0	0	0	0	0	0	0.456	0.456
EPS15	BIN2	9606.ENSP00000360798	9606.ENSP00000267012	0	0	0	0	0.064	0.246	0.9	0.251	0.94
EPS15	BIN1	9606.ENSP00000360798	9606.ENSP00000316779	0	0	0	0	0.064	0.246	0.9	0.584	0.966
EPS15	BMP2K	9606.ENSP00000360798	9606.ENSP00000334836	0	0	0	0	0.108	0.474	0	0.394	0.691
EPS15	BDP1	9606.ENSP00000360798	9606.ENSP00000351575	0	0	0	0	0.089	0	0	0.472	0.498
EPS15	RAD23A	9606.ENSP00000360798	9606.ENSP00000467024	0	0	0	0	0.049	0.4	0	0.26	0.541
EPS15	SYNJ1	9606.ENSP00000360798	9606.ENSP00000409667	0	0	0	0	0.065	0.378	0.9	0.755	0.983
ERCC6L	RAD51AP1	9606.ENSP00000334675	9606.ENSP00000228843	0	0	0	0	0.55	0	0	0.108	0.581
ERCC6L	MCM2	9606.ENSP00000334675	9606.ENSP00000265056	0	0	0	0	0.325	0.149	0	0.184	0.491
ERCC6L	ANLN	9606.ENSP00000334675	9606.ENSP00000265748	0	0	0	0	0.561	0	0	0.155	0.613
ERCC6L	TPX2	9606.ENSP00000334675	9606.ENSP00000300403	0	0	0	0	0.588	0	0	0.241	0.674
ERCC6L	CLSPN	9606.ENSP00000334675	9606.ENSP00000312995	0	0	0	0	0.326	0.132	0	0.213	0.499
ERCC6L	SKA3	9606.ENSP00000334675	9606.ENSP00000319417	0	0	0	0	0.501	0	0	0.14	0.552
ERCC6L	CDCA2	9606.ENSP00000334675	9606.ENSP00000328228	0	0	0	0	0.384	0	0	0.096	0.42
ERCC6L	TOP2B	9606.ENSP00000334675	9606.ENSP00000396704	0	0	0	0	0.102	0.164	0	0.274	0.407
ERCC6L	RAD23A	9606.ENSP00000334675	9606.ENSP00000467024	0	0	0	0	0	0.203	0	0.293	0.412
ERCC6L	MDC1	9606.ENSP00000334675	9606.ENSP00000365588	0	0	0	0	0.109	0.164	0	0.316	0.446
ERCC6L	BRCA1	9606.ENSP00000334675	9606.ENSP00000418960	0	0	0	0	0.287	0.056	0	0.28	0.474
ERCC6L	INCENP	9606.ENSP00000334675	9606.ENSP00000378295	0	0	0	0	0.24	0	0	0.392	0.518
ERCC6L	SFSWAP	9606.ENSP00000334675	9606.ENSP00000437738	0	0	0	0	0.049	0	0	0.539	0.542
ERCC6L	RRM2	9606.ENSP00000334675	9606.ENSP00000353770	0	0	0	0	0.552	0.056	0	0.125	0.598
ERCC6L	MKI67	9606.ENSP00000334675	9606.ENSP00000357643	0	0	0	0	0.568	0	0	0.112	0.6
ERCC6L	CHEK1	9606.ENSP00000334675	9606.ENSP00000388648	0	0	0	0	0.41	0.163	0	0.324	0.637
ERCC6L	NUSAP1	9606.ENSP00000334675	9606.ENSP00000453403	0	0	0	0	0.562	0	0	0.262	0.663
ERCC6L	TOP2A	9606.ENSP00000334675	9606.ENSP00000411532	0	0	0	0	0.583	0.166	0	0.543	0.827
ERCC6L	MCM10	9606.ENSP00000334675	9606.ENSP00000418268	0	0	0	0	0.782	0.06	0	0.293	0.842
FIP1L1	SRSF9	9606.ENSP00000336752	9606.ENSP00000229390	0	0	0	0	0.145	0.338	0.6	0.135	0.777
FIP1L1	THOC2	9606.ENSP00000336752	9606.ENSP00000245838	0	0	0	0	0.201	0.115	0.6	0.153	0.728
FIP1L1	ZC3H4	9606.ENSP00000336752	9606.ENSP00000253048	0	0	0	0	0.075	0.608	0	0.377	0.754
FIP1L1	CASC3	9606.ENSP00000336752	9606.ENSP00000264645	0	0	0	0	0	0	0.6	0	0.6
FIP1L1	NUP35	9606.ENSP00000336752	9606.ENSP00000295119	0	0	0	0	0.146	0	0.9	0	0.911
FIP1L1	SRRM1	9606.ENSP00000336752	9606.ENSP00000326261	0	0	0	0	0.118	0	0.6	0	0.632
FIP1L1	ZC3H18	9606.ENSP00000336752	9606.ENSP00000416951	0	0	0	0	0.047	0.46	0	0	0.463
FIP1L1	BCOR	9606.ENSP00000336752	9606.ENSP00000367705	0	0	0	0	0	0	0	0.514	0.514
FIP1L1	ZC3H11A	9606.ENSP00000336752	9606.ENSP00000438527	0	0	0	0	0.105	0	0.6	0	0.627
FIP1L1	SRSF2	9606.ENSP00000336752	9606.ENSP00000376276	0	0	0	0	0.092	0	0.6	0.273	0.713
FIP1L1	SRSF5	9606.ENSP00000336752	9606.ENSP00000452123	0	0	0	0	0.096	0.338	0.6	0.152	0.769
FIP1L1	TPR	9606.ENSP00000336752	9606.ENSP00000356448	0	0	0	0	0.219	0.152	0.9	0	0.927
FNBP4	ARGLU1	9606.ENSP00000263773	9606.ENSP00000383059	0	0	0	0	0.46	0	0	0	0.46
FNBP4	ZC3H18	9606.ENSP00000263773	9606.ENSP00000416951	0	0	0	0	0.306	0.41	0	0	0.573
FOXO3	TCF3	9606.ENSP00000385824	9606.ENSP00000262965	0	0	0	0	0.049	0.146	0	0.445	0.511
FOXO3	EIF4EBP1	9606.ENSP00000385824	9606.ENSP00000340691	0	0	0	0	0	0.06	0	0.626	0.634
FOXO3	ZEB1	9606.ENSP00000385824	9606.ENSP00000354487	0	0	0	0	0	0	0.9	0.342	0.931
FOXO3	IRS2	9606.ENSP00000385824	9606.ENSP00000365016	0	0	0	0	0.062	0.284	0	0.478	0.619
FOXO3	TOP2A	9606.ENSP00000385824	9606.ENSP00000411532	0	0	0	0	0.062	0	0	0.457	0.468
FOXO3	BRCA1	9606.ENSP00000385824	9606.ENSP00000418960	0	0	0	0	0	0.27	0	0.455	0.585
FOXO3	TNRC6B	9606.ENSP00000385824	9606.ENSP00000401946	0	0	0	0	0	0	0.9	0	0.9
FTSJ3	KNOP1	9606.ENSP00000396673	9606.ENSP00000219837	0	0	0	0	0	0.427	0	0	0.426
FTSJ3	GLTSCR2	9606.ENSP00000396673	9606.ENSP00000246802	0	0	0	0	0.879	0.833	0	0.412	0.987
FTSJ3	DDX21	9606.ENSP00000396673	9606.ENSP00000346120	0	0	0	0	0.52	0.351	0	0.108	0.698
FTSJ3	RRP15	9606.ENSP00000396673	9606.ENSP00000355899	0	0	0	0	0.855	0	0.54	0.251	0.946
FTSJ3	DKC1	9606.ENSP00000396673	9606.ENSP00000358563	0.074	0	0	0	0.861	0.358	0	0.254	0.93
FTSJ3	NOLC1	9606.ENSP00000396673	9606.ENSP00000385410	0	0	0	0	0.859	0	0	0.048	0.86
FTSJ3	GNL3	9606.ENSP00000396673	9606.ENSP00000395772	0	0	0	0	0.817	0.9	0	0.552	0.991
FTSJ3	GPATCH4	9606.ENSP00000396673	9606.ENSP00000396441	0	0	0	0	0.673	0.226	0	0	0.736
FTSJ3	DNTTIP2	9606.ENSP00000396673	9606.ENSP00000411010	0	0	0	0	0.658	0	0	0	0.658
FTSJ3	NOP14	9606.ENSP00000396673	9606.ENSP00000405068	0	0	0	0	0.887	0.369	0.9	0	0.992
GAB1	IRS2	9606.ENSP00000262995	9606.ENSP00000365016	0	0	0	0.546	0	0.153	0.5	0.294	0.611
GLTSCR2	EEF1B2	9606.ENSP00000246802	9606.ENSP00000376056	0	0	0	0	0.163	0	0	0.322	0.409
GLTSCR2	GPATCH4	9606.ENSP00000246802	9606.ENSP00000396441	0	0	0	0	0.652	0	0	0.063	0.66
GLTSCR2	NOLC1	9606.ENSP00000246802	9606.ENSP00000385410	0	0	0	0	0.51	0	0	0.561	0.776
GLTSCR2	DNTTIP2	9606.ENSP00000246802	9606.ENSP00000411010	0	0	0	0	0.81	0	0	0.151	0.832
GLTSCR2	DDX21	9606.ENSP00000246802	9606.ENSP00000346120	0	0	0	0	0.839	0.059	0	0.093	0.85
GLTSCR2	NOP14	9606.ENSP00000246802	9606.ENSP00000405068	0	0	0	0	0.872	0	0	0.105	0.881
GLTSCR2	RRP15	9606.ENSP00000246802	9606.ENSP00000355899	0	0	0	0	0.863	0	0	0.229	0.89
GLTSCR2	GNL3	9606.ENSP00000246802	9606.ENSP00000395772	0	0	0	0	0.639	0.632	0	0.432	0.918
GLTSCR2	DKC1	9606.ENSP00000246802	9606.ENSP00000358563	0	0	0	0	0.518	0.769	0	0.365	0.923
GLTSCR2	FTSJ3	9606.ENSP00000246802	9606.ENSP00000396673	0	0	0	0	0.879	0.833	0	0.412	0.987
GNL3	GLTSCR2	9606.ENSP00000395772	9606.ENSP00000246802	0	0	0	0	0.639	0.632	0	0.432	0.918
GNL3	PTMA	9606.ENSP00000395772	9606.ENSP00000344547	0	0	0	0	0.089	0	0	0.389	0.42
GNL3	DDX21	9606.ENSP00000395772	9606.ENSP00000346120	0	0	0	0	0.559	0.165	0.8	0.356	0.946
GNL3	RRP15	9606.ENSP00000395772	9606.ENSP00000355899	0	0	0	0	0.822	0	0	0.245	0.86
GNL3	DKC1	9606.ENSP00000395772	9606.ENSP00000358563	0	0	0	0	0.913	0.817	0	0.231	0.986
GNL3	NOLC1	9606.ENSP00000395772	9606.ENSP00000385410	0	0	0	0	0.824	0	0	0.506	0.909
GNL3	EIF4B	9606.ENSP00000395772	9606.ENSP00000388806	0	0	0	0	0.701	0	0	0.079	0.712
GNL3	UBAP2L	9606.ENSP00000395772	9606.ENSP00000389445	0	0	0	0	0.048	0	0	0.572	0.575
GNL3	GPATCH4	9606.ENSP00000395772	9606.ENSP00000396441	0	0	0	0	0.399	0.213	0	0.048	0.51
GNL3	DNTTIP2	9606.ENSP00000395772	9606.ENSP00000411010	0	0	0	0	0.515	0	0	0	0.515
GNL3	NOL7	9606.ENSP00000395772	9606.ENSP00000405674	0	0	0	0	0.495	0	0	0.326	0.645
GNL3	NOP14	9606.ENSP00000395772	9606.ENSP00000405068	0	0	0	0	0.816	0.386	0	0.101	0.889
GNL3	FTSJ3	9606.ENSP00000395772	9606.ENSP00000396673	0	0	0	0	0.817	0.9	0	0.552	0.991
GPATCH4	NUFIP2	9606.ENSP00000396441	9606.ENSP00000225388	0	0	0	0	0.046	0	0	0.618	0.62
GPATCH4	GLTSCR2	9606.ENSP00000396441	9606.ENSP00000246802	0	0	0	0	0.652	0	0	0.063	0.66
GPATCH4	DDX21	9606.ENSP00000396441	9606.ENSP00000346120	0	0	0	0	0.29	0.246	0	0.072	0.46
GPATCH4	AHCTF1	9606.ENSP00000396441	9606.ENSP00000355465	0	0	0	0	0.048	0	0	0.396	0.4
GPATCH4	RRP15	9606.ENSP00000396441	9606.ENSP00000355899	0	0	0	0	0.448	0.09	0	0	0.477
GPATCH4	PHACTR4	9606.ENSP00000396441	9606.ENSP00000362942	0	0	0	0	0	0	0	0.556	0.556
GPATCH4	NOLC1	9606.ENSP00000396441	9606.ENSP00000385410	0	0	0	0	0.363	0.258	0	0.14	0.558
GPATCH4	GNL3	9606.ENSP00000396441	9606.ENSP00000395772	0	0	0	0	0.399	0.213	0	0.048	0.51
GPATCH4	LARP4B	9606.ENSP00000396441	9606.ENSP00000482767	0	0	0	0	0.069	0	0	0.584	0.596
GPATCH4	NOP14	9606.ENSP00000396441	9606.ENSP00000405068	0	0	0	0	0.524	0.313	0	0	0.659
GPATCH4	FTSJ3	9606.ENSP00000396441	9606.ENSP00000396673	0	0	0	0	0.673	0.226	0	0	0.736
GPBP1	PSIP1	9606.ENSP00000264779	9606.ENSP00000370109	0	0	0	0	0.084	0	0	0.441	0.466
GPBP1	TOP2A	9606.ENSP00000264779	9606.ENSP00000411532	0	0	0	0	0.063	0	0	0.731	0.737
GTF2F1	SRSF9	9606.ENSP00000377969	9606.ENSP00000229390	0	0	0	0	0.066	0.386	0	0	0.402
GTF2F1	MED26	9606.ENSP00000377969	9606.ENSP00000263390	0	0	0	0	0.062	0.332	0	0.213	0.463
GTF2F1	TAF7	9606.ENSP00000377969	9606.ENSP00000312709	0	0	0	0	0.156	0	0.9	0.712	0.973
GTF2F1	HNRNPD	9606.ENSP00000377969	9606.ENSP00000313199	0	0	0	0	0.053	0	0.6	0.061	0.613
GTF2F1	SRRM1	9606.ENSP00000377969	9606.ENSP00000326261	0	0	0	0	0.204	0.289	0	0	0.41
GTF2F1	MYB	9606.ENSP00000377969	9606.ENSP00000339992	0	0	0	0	0.084	0	0.9	0.101	0.91
GTF2F1	ZRANB2	9606.ENSP00000377969	9606.ENSP00000359958	0	0	0	0	0.095	0	0	0.613	0.635
GTF2F1	YBX1	9606.ENSP00000377969	9606.ENSP00000361626	0	0	0	0	0.082	0	0.6	0	0.617
GTF2F1	EEF1B2	9606.ENSP00000377969	9606.ENSP00000376056	0	0	0	0	0	0.613	0	0	0.613
GTF2F1	SRSF2	9606.ENSP00000377969	9606.ENSP00000376276	0	0	0	0	0.304	0	0.6	0.082	0.722
GTF2F1	EAF1	9606.ENSP00000377969	9606.ENSP00000380054	0	0	0	0	0.063	0.227	0.6	0	0.684
GTF2F1	SFSWAP	9606.ENSP00000377969	9606.ENSP00000437738	0	0	0	0	0.057	0	0	0.736	0.74
GTF2F1	TCEA1	9606.ENSP00000377969	9606.ENSP00000428426	0	0	0	0	0.062	0.925	0.9	0.51	0.996
GYPA	ANK1	9606.ENSP00000354003	9606.ENSP00000265709	0	0	0	0	0.099	0	0	0.427	0.462
GYPA	TAL1	9606.ENSP00000354003	9606.ENSP00000294339	0	0	0	0	0.108	0	0	0.457	0.495
GYPA	AHSP	9606.ENSP00000354003	9606.ENSP00000307199	0	0	0	0	0.189	0	0	0.392	0.485
GYPA	BCL11A	9606.ENSP00000354003	9606.ENSP00000338774	0	0	0	0	0	0	0	0.408	0.408
GYPA	SPN	9606.ENSP00000354003	9606.ENSP00000353238	0	0	0	0	0.069	0	0	0.566	0.578
GYPA	DMTN	9606.ENSP00000354003	9606.ENSP00000427866	0	0	0	0	0.062	0	0	0.425	0.437
HDGF	RRP15	9606.ENSP00000357189	9606.ENSP00000355899	0	0	0	0	0.045	0	0	0.463	0.465
HDGFRP2	SMNDC1	9606.ENSP00000483345	9606.ENSP00000358616	0	0	0	0	0.113	0	0	0.372	0.419
HEMGN	ADD2	9606.ENSP00000480020	9606.ENSP00000264436	0	0	0	0	0.063	0	0	0.486	0.497
HEMGN	AHSP	9606.ENSP00000480020	9606.ENSP00000307199	0	0	0	0	0.207	0	0	0.285	0.409
HEXIM1	CDK13	9606.ENSP00000328773	9606.ENSP00000181839	0	0	0	0	0.105	0.27	0	0.295	0.499
HEXIM1	HEXIM2	9606.ENSP00000328773	9606.ENSP00000302276	0	0	0	0.879	0	0.872	0	0.944	0.886
HEXIM1	LARP1	9606.ENSP00000328773	9606.ENSP00000336721	0	0	0	0	0.065	0	0	0.43	0.444
HEXIM1	DDX21	9606.ENSP00000328773	9606.ENSP00000346120	0	0	0	0	0.087	0.486	0	0.403	0.695
HEXIM1	SRSF2	9606.ENSP00000328773	9606.ENSP00000376276	0	0	0	0	0.123	0.343	0	0.516	0.697
HEXIM2	TCF12	9606.ENSP00000302276	9606.ENSP00000388940	0	0	0	0	0	0.654	0	0	0.654
HEXIM2	HEXIM1	9606.ENSP00000302276	9606.ENSP00000328773	0	0	0	0.879	0	0.872	0	0.944	0.886
HIRIP3	MCM2	9606.ENSP00000279392	9606.ENSP00000265056	0	0	0	0	0.249	0.377	0	0	0.512
HIRIP3	TMPO	9606.ENSP00000279392	9606.ENSP00000266732	0	0	0	0	0.064	0.246	0	0.321	0.479
HIRIP3	MKI67	9606.ENSP00000279392	9606.ENSP00000357643	0	0	0	0	0.106	0	0	0.356	0.401
HN1	HN1L	9606.ENSP00000348316	9606.ENSP00000248098	0	0	0	0	0.065	0	0	0.548	0.56
HN1	STMN1	9606.ENSP00000348316	9606.ENSP00000410452	0	0	0	0	0.122	0.621	0	0	0.653
HN1L	HN1	9606.ENSP00000248098	9606.ENSP00000348316	0	0	0	0	0.065	0	0	0.548	0.56
HN1L	STMN1	9606.ENSP00000248098	9606.ENSP00000410452	0	0	0	0	0.043	0.68	0	0	0.68
HNRNPAB	SRSF9	9606.ENSP00000351108	9606.ENSP00000229390	0	0	0	0	0.322	0.182	0	0.31	0.584
HNRNPAB	PSME3	9606.ENSP00000351108	9606.ENSP00000293362	0	0	0	0	0.33	0.089	0	0.17	0.449
HNRNPAB	PHAX	9606.ENSP00000351108	9606.ENSP00000297540	0	0	0	0	0.062	0	0	0.419	0.432
HNRNPAB	HNRNPD	9606.ENSP00000351108	9606.ENSP00000313199	0	0	0	0.957	0.172	0.848	0	0.457	0.871
HNRNPAB	NOLC1	9606.ENSP00000351108	9606.ENSP00000385410	0	0	0	0	0.405	0.058	0	0.048	0.42
HNRNPAB	BRCA1	9606.ENSP00000351108	9606.ENSP00000418960	0	0	0	0	0.08	0.405	0	0	0.429
HNRNPAB	MDC1	9606.ENSP00000351108	9606.ENSP00000365588	0	0	0	0	0.077	0.415	0	0	0.437
HNRNPAB	ZC3H18	9606.ENSP00000351108	9606.ENSP00000416951	0	0	0	0	0.067	0.27	0	0.265	0.456
HNRNPAB	LRRFIP1	9606.ENSP00000351108	9606.ENSP00000375857	0	0	0	0	0.049	0	0	0.467	0.471
HNRNPAB	SF1	9606.ENSP00000351108	9606.ENSP00000366604	0	0	0	0	0.155	0.414	0	0.11	0.521
HNRNPAB	YBX1	9606.ENSP00000351108	9606.ENSP00000361626	0	0	0	0	0.184	0.405	0	0.131	0.541
HNRNPAB	SRSF2	9606.ENSP00000351108	9606.ENSP00000376276	0	0	0.291	0	0.285	0.168	0	0.228	0.631
HNRNPD	SRSF9	9606.ENSP00000313199	9606.ENSP00000229390	0	0	0	0	0.136	0.182	0	0.328	0.484
HNRNPD	SNRPC	9606.ENSP00000313199	9606.ENSP00000244520	0	0	0	0	0.108	0.696	0	0.175	0.757
HNRNPD	PSME3	9606.ENSP00000313199	9606.ENSP00000293362	0	0	0	0	0.161	0.089	0.9	0.148	0.926
HNRNPD	SLBP	9606.ENSP00000313199	9606.ENSP00000417686	0	0	0	0	0.159	0	0	0.338	0.42
HNRNPD	LARP1	9606.ENSP00000313199	9606.ENSP00000336721	0	0	0	0	0.085	0.282	0	0.193	0.424
HNRNPD	BRCA1	9606.ENSP00000313199	9606.ENSP00000418960	0	0	0	0	0.062	0.44	0	0.18	0.531
HNRNPD	SRSF5	9606.ENSP00000313199	9606.ENSP00000452123	0	0	0	0	0.143	0.213	0	0.39	0.553
HNRNPD	SF1	9606.ENSP00000313199	9606.ENSP00000366604	0	0	0	0	0.164	0.414	0	0.164	0.555
HNRNPD	RRM2	9606.ENSP00000313199	9606.ENSP00000353770	0	0	0	0	0.071	0	0	0.542	0.557
HNRNPD	BCLAF1	9606.ENSP00000313199	9606.ENSP00000435210	0	0	0	0	0.556	0	0	0.072	0.571
HNRNPD	GTF2F1	9606.ENSP00000313199	9606.ENSP00000377969	0	0	0	0	0.053	0	0.6	0.061	0.613
HNRNPD	SRSF2	9606.ENSP00000313199	9606.ENSP00000376276	0	0	0	0	0.3	0.168	0	0.431	0.64
HNRNPD	SAFB	9606.ENSP00000313199	9606.ENSP00000467423	0	0	0	0	0.126	0.344	0	0.497	0.687
HNRNPD	CHEK1	9606.ENSP00000313199	9606.ENSP00000388648	0	0	0	0	0	0.684	0	0.113	0.707
HNRNPD	HNRNPAB	9606.ENSP00000313199	9606.ENSP00000351108	0	0	0	0.957	0.172	0.848	0	0.457	0.871
HNRNPD	YBX1	9606.ENSP00000313199	9606.ENSP00000361626	0	0	0	0	0.104	0.538	0	0.806	0.913
INCENP	LIG1	9606.ENSP00000378295	9606.ENSP00000263274	0	0	0	0	0.552	0	0	0	0.552
INCENP	MCM2	9606.ENSP00000378295	9606.ENSP00000265056	0	0	0	0	0.596	0	0	0.232	0.676
INCENP	ANLN	9606.ENSP00000378295	9606.ENSP00000265748	0	0	0	0	0.589	0.27	0	0.566	0.858
INCENP	TICRR	9606.ENSP00000378295	9606.ENSP00000268138	0	0	0	0	0.212	0	0	0.293	0.419
INCENP	CENPC	9606.ENSP00000378295	9606.ENSP00000273853	0	0	0	0	0.065	0.161	0	0.717	0.758
INCENP	NUP35	9606.ENSP00000378295	9606.ENSP00000295119	0	0	0	0	0.123	0	0.9	0.074	0.911
INCENP	TPX2	9606.ENSP00000378295	9606.ENSP00000300403	0	0	0	0	0.689	0	0	0.699	0.902
INCENP	SKA3	9606.ENSP00000378295	9606.ENSP00000319417	0	0	0	0	0.254	0	0	0.295	0.452
INCENP	CDCA2	9606.ENSP00000378295	9606.ENSP00000328228	0	0	0	0	0.331	0	0	0.436	0.607
INCENP	ERCC6L	9606.ENSP00000378295	9606.ENSP00000334675	0	0	0	0	0.24	0	0	0.392	0.518
INCENP	AHCTF1	9606.ENSP00000378295	9606.ENSP00000355465	0	0	0	0	0.082	0	0	0.382	0.408
INCENP	TPR	9606.ENSP00000378295	9606.ENSP00000356448	0	0	0	0	0.082	0	0.9	0.123	0.912
INCENP	MKI67	9606.ENSP00000378295	9606.ENSP00000357643	0	0	0	0	0.497	0	0	0.099	0.528
INCENP	SUMO1	9606.ENSP00000378295	9606.ENSP00000376077	0	0	0	0	0.067	0	0.9	0.162	0.915
INCENP	ATF7	9606.ENSP00000378295	9606.ENSP00000399465	0	0	0	0	0	0	0	0.41	0.41
INCENP	CHEK1	9606.ENSP00000378295	9606.ENSP00000388648	0	0	0	0	0.198	0	0	0.387	0.488
INCENP	STMN1	9606.ENSP00000378295	9606.ENSP00000410452	0	0	0	0	0.096	0	0	0.497	0.526
INCENP	CDCA3	9606.ENSP00000378295	9606.ENSP00000442068	0	0	0	0	0.655	0	0	0.082	0.67
INCENP	TOP2A	9606.ENSP00000378295	9606.ENSP00000411532	0	0	0	0	0.699	0	0	0.264	0.769
INCENP	NUSAP1	9606.ENSP00000378295	9606.ENSP00000453403	0	0	0	0	0.926	0	0	0.277	0.944
IRS2	GAB1	9606.ENSP00000365016	9606.ENSP00000262995	0	0	0	0.546	0	0.153	0.5	0.294	0.611
IRS2	EIF4EBP1	9606.ENSP00000365016	9606.ENSP00000340691	0	0	0	0	0	0	0	0.468	0.468
IRS2	FOXO3	9606.ENSP00000365016	9606.ENSP00000385824	0	0	0	0	0.062	0.284	0	0.478	0.619
JMJD1C	RNF168	9606.ENSP00000382204	9606.ENSP00000320898	0	0	0	0	0	0.27	0	0.227	0.411
JMJD1C	MDC1	9606.ENSP00000382204	9606.ENSP00000365588	0	0	0	0	0	0.27	0	0.295	0.463
JMJD1C	ZNHIT3	9606.ENSP00000382204	9606.ENSP00000484687	0	0	0	0	0	0	0	0.421	0.421
JMJD1C	RYBP	9606.ENSP00000382204	9606.ENSP00000419494	0	0	0	0	0	0	0	0.545	0.545
KMT2D	CDK13	9606.ENSP00000301067	9606.ENSP00000181839	0	0	0	0	0.063	0.15	0	0.382	0.465
KMT2D	APC	9606.ENSP00000301067	9606.ENSP00000257430	0	0	0	0	0.062	0	0.65	0.084	0.673
KMT2D	BRCA1	9606.ENSP00000301067	9606.ENSP00000418960	0	0	0	0	0.051	0.056	0	0.419	0.434
KMT2D	BCOR	9606.ENSP00000301067	9606.ENSP00000367705	0	0	0	0	0.062	0	0	0.529	0.54
KMT2D	ATRX	9606.ENSP00000301067	9606.ENSP00000362441	0	0	0	0	0.064	0.153	0	0.476	0.548
KMT2D	PSIP1	9606.ENSP00000301067	9606.ENSP00000370109	0	0	0	0	0.084	0.056	0	0.571	0.596
KMT2D	PRRC2B	9606.ENSP00000301067	9606.ENSP00000349856	0	0	0	0	0.672	0	0	0.107	0.694
KMT2D	SPEN	9606.ENSP00000301067	9606.ENSP00000364912	0	0	0	0	0.654	0.166	0	0.395	0.81
KMT2D	SRRM2	9606.ENSP00000301067	9606.ENSP00000301740	0	0	0	0	0.836	0	0	0.061	0.839
KMT2D	TNRC6B	9606.ENSP00000301067	9606.ENSP00000401946	0	0	0	0	0.098	0	0.9	0	0.905
KNOP1	FTSJ3	9606.ENSP00000219837	9606.ENSP00000396673	0	0	0	0	0	0.427	0	0	0.426
LARP1	PATL1	9606.ENSP00000336721	9606.ENSP00000300146	0	0	0	0	0.067	0.061	0	0.578	0.598
LARP1	HNRNPD	9606.ENSP00000336721	9606.ENSP00000313199	0	0	0	0	0.085	0.282	0	0.193	0.424
LARP1	HEXIM1	9606.ENSP00000336721	9606.ENSP00000328773	0	0	0	0	0.065	0	0	0.43	0.444
LARP1	ATXN2	9606.ENSP00000336721	9606.ENSP00000366843	0	0	0	0	0.06	0.346	0	0.109	0.404
LARP1	DKC1	9606.ENSP00000336721	9606.ENSP00000358563	0	0	0	0	0.196	0.274	0	0.063	0.405
LARP1	ANKRD17	9606.ENSP00000336721	9606.ENSP00000351416	0	0	0	0	0.121	0.076	0	0.333	0.411
LARP1	EIF4ENIF1	9606.ENSP00000336721	9606.ENSP00000380659	0	0	0	0	0.062	0	0	0.434	0.446
LARP1	EIF4B	9606.ENSP00000336721	9606.ENSP00000388806	0	0	0	0	0.115	0.057	0	0.52	0.565
LARP1	YBX1	9606.ENSP00000336721	9606.ENSP00000361626	0	0	0	0	0.163	0.504	0	0.49	0.77
LARP4B	NUFIP2	9606.ENSP00000482767	9606.ENSP00000225388	0	0	0	0	0.105	0	0.72	0	0.738
LARP4B	ABCF1	9606.ENSP00000482767	9606.ENSP00000313603	0	0	0	0	0.1	0	0.9	0	0.906
LARP4B	CAPRIN1	9606.ENSP00000482767	9606.ENSP00000340329	0	0	0	0	0.061	0.419	0	0.048	0.435
LARP4B	PRRC2C	9606.ENSP00000482767	9606.ENSP00000343629	0	0	0	0	0.044	0.409	0	0	0.41
LARP4B	PHACTR4	9606.ENSP00000482767	9606.ENSP00000362942	0	0	0	0	0	0	0	0.515	0.515
LARP4B	BTF3	9606.ENSP00000482767	9606.ENSP00000369965	0	0	0	0	0.087	0	0.54	0	0.562
LARP4B	GPATCH4	9606.ENSP00000482767	9606.ENSP00000396441	0	0	0	0	0.069	0	0	0.584	0.596
LIG1	NASP	9606.ENSP00000263274	9606.ENSP00000255120	0	0	0	0	0.84	0	0	0.043	0.84
LIG1	MDC1	9606.ENSP00000263274	9606.ENSP00000365588	0	0	0	0	0.181	0	0	0.385	0.475
LIG1	BRCA1	9606.ENSP00000263274	9606.ENSP00000418960	0	0	0	0	0.147	0	0	0.454	0.515
LIG1	ATRX	9606.ENSP00000263274	9606.ENSP00000362441	0	0	0	0	0.063	0.102	0	0.507	0.549
LIG1	INCENP	9606.ENSP00000263274	9606.ENSP00000378295	0	0	0	0	0.552	0	0	0	0.552
LIG1	RRM2	9606.ENSP00000263274	9606.ENSP00000353770	0	0	0	0	0.58	0	0	0.043	0.581
LIG1	CLSPN	9606.ENSP00000263274	9606.ENSP00000312995	0	0	0	0	0.398	0	0	0.343	0.588
LIG1	TOP2B	9606.ENSP00000263274	9606.ENSP00000396704	0	0	0	0	0.348	0.057	0	0.404	0.602
LIG1	TOP2A	9606.ENSP00000263274	9606.ENSP00000411532	0	0	0	0	0.434	0.057	0	0.397	0.65
LIG1	MCM10	9606.ENSP00000263274	9606.ENSP00000418268	0	0	0	0	0.229	0	0	0.571	0.655
LIG1	SLBP	9606.ENSP00000263274	9606.ENSP00000417686	0	0	0	0	0.828	0	0	0	0.828
LIG1	RAD23A	9606.ENSP00000263274	9606.ENSP00000467024	0	0	0	0	0.064	0.726	0	0.393	0.83
LIG1	CHEK1	9606.ENSP00000263274	9606.ENSP00000388648	0	0	0	0	0.254	0.788	0	0.726	0.953
LIG1	MCM2	9606.ENSP00000263274	9606.ENSP00000265056	0	0	0	0	0.956	0	0	0.492	0.976
LIN52	TOP2A	9606.ENSP00000451812	9606.ENSP00000411532	0	0	0	0	0	0	0.9	0.064	0.902
LRRFIP1	HNRNPAB	9606.ENSP00000375857	9606.ENSP00000351108	0	0	0	0	0.049	0	0	0.467	0.471
LSP1	BRCA1	9606.ENSP00000371194	9606.ENSP00000418960	0	0	0	0	0	0	0	0.49	0.489
LSP1	CAST	9606.ENSP00000371194	9606.ENSP00000379157	0	0	0	0	0	0	0	0.539	0.539
MAP2	CLSPN	9606.ENSP00000353508	9606.ENSP00000312995	0	0	0	0	0	0	0	0.445	0.445
MAP2	STMN1	9606.ENSP00000353508	9606.ENSP00000410452	0	0	0	0	0.062	0.057	0	0.414	0.436
MBD1	SUMO1	9606.ENSP00000468785	9606.ENSP00000376077	0	0	0	0	0	0.27	0.8	0.396	0.904
MBD1	ATF7IP	9606.ENSP00000468785	9606.ENSP00000440440	0	0	0	0	0	0.675	0	0.798	0.931
MCM10	RAD51AP1	9606.ENSP00000418268	9606.ENSP00000228843	0	0	0	0	0.783	0	0	0.262	0.833
MCM10	LIG1	9606.ENSP00000418268	9606.ENSP00000263274	0	0	0	0	0.229	0	0	0.571	0.655
MCM10	MCM2	9606.ENSP00000418268	9606.ENSP00000265056	0	0	0	0	0.816	0.982	0.6	0.994	0.999
MCM10	ANLN	9606.ENSP00000418268	9606.ENSP00000265748	0	0	0	0	0.583	0	0	0.081	0.6
MCM10	TICRR	9606.ENSP00000418268	9606.ENSP00000268138	0	0	0	0	0.565	0	0	0.853	0.933
MCM10	TPX2	9606.ENSP00000418268	9606.ENSP00000300403	0	0	0	0	0.785	0	0	0.218	0.825
MCM10	CLSPN	9606.ENSP00000418268	9606.ENSP00000312995	0	0	0	0	0.628	0	0.6	0.719	0.954
MCM10	SKA3	9606.ENSP00000418268	9606.ENSP00000319417	0	0	0	0	0.564	0	0	0.086	0.585
MCM10	CDCA2	9606.ENSP00000418268	9606.ENSP00000328228	0	0	0	0	0.55	0	0	0.39	0.714
MCM10	ERCC6L	9606.ENSP00000418268	9606.ENSP00000334675	0	0	0	0	0.782	0.06	0	0.293	0.842
MCM10	RRM2	9606.ENSP00000418268	9606.ENSP00000353770	0	0	0	0	0.803	0	0	0.473	0.892
MCM10	MKI67	9606.ENSP00000418268	9606.ENSP00000357643	0	0	0	0	0.793	0	0	0.316	0.852
MCM10	CHEK1	9606.ENSP00000418268	9606.ENSP00000388648	0	0	0	0	0.794	0	0.65	0.754	0.98
MCM10	TOP2A	9606.ENSP00000418268	9606.ENSP00000411532	0	0	0	0	0.785	0	0	0.38	0.861
MCM10	CDCA3	9606.ENSP00000418268	9606.ENSP00000442068	0	0	0	0	0.224	0	0	0.378	0.496
MCM10	BRCA1	9606.ENSP00000418268	9606.ENSP00000418960	0	0	0	0	0.567	0.459	0	0.324	0.827
MCM10	NUSAP1	9606.ENSP00000418268	9606.ENSP00000453403	0	0	0	0	0.785	0	0	0.341	0.852
MCM2	RAD51AP1	9606.ENSP00000265056	9606.ENSP00000228843	0	0	0	0	0.694	0	0	0.331	0.787
MCM2	RIF1	9606.ENSP00000265056	9606.ENSP00000243326	0	0	0	0	0.85	0	0	0.206	0.876
MCM2	NASP	9606.ENSP00000265056	9606.ENSP00000255120	0	0	0	0	0.906	0	0	0.363	0.938
MCM2	LIG1	9606.ENSP00000265056	9606.ENSP00000263274	0	0	0	0	0.956	0	0	0.492	0.976
MCM2	SKA3	9606.ENSP00000265056	9606.ENSP00000319417	0	0	0	0	0.405	0	0	0	0.405
MCM2	MDC1	9606.ENSP00000265056	9606.ENSP00000365588	0	0	0	0	0.147	0.101	0	0.302	0.418
MCM2	ATRX	9606.ENSP00000265056	9606.ENSP00000362441	0	0	0	0	0.083	0.149	0	0.335	0.436
MCM2	TCEA1	9606.ENSP00000265056	9606.ENSP00000428426	0	0	0	0	0.089	0.27	0	0.225	0.439
MCM2	CDCA2	9606.ENSP00000265056	9606.ENSP00000328228	0	0	0	0	0.383	0	0	0.205	0.489
MCM2	ERCC6L	9606.ENSP00000265056	9606.ENSP00000334675	0	0	0	0	0.325	0.149	0	0.184	0.491
MCM2	HIRIP3	9606.ENSP00000265056	9606.ENSP00000279392	0	0	0	0	0.249	0.377	0	0	0.512
MCM2	BRCA1	9606.ENSP00000265056	9606.ENSP00000418960	0	0	0	0	0.327	0	0	0.406	0.583
MCM2	ANLN	9606.ENSP00000265056	9606.ENSP00000265748	0	0	0	0	0.523	0	0	0.201	0.603
MCM2	INCENP	9606.ENSP00000265056	9606.ENSP00000378295	0	0	0	0	0.596	0	0	0.232	0.676
MCM2	MKI67	9606.ENSP00000265056	9606.ENSP00000357643	0	0	0	0	0.593	0	0	0.407	0.748
MCM2	AHCTF1	9606.ENSP00000265056	9606.ENSP00000355465	0	0	0	0	0.072	0	0	0.786	0.793
MCM2	TPX2	9606.ENSP00000265056	9606.ENSP00000300403	0	0	0	0	0.791	0	0	0.325	0.853
MCM2	NUSAP1	9606.ENSP00000265056	9606.ENSP00000453403	0	0	0	0	0.795	0	0	0.394	0.87
MCM2	SLBP	9606.ENSP00000265056	9606.ENSP00000417686	0	0	0	0	0.863	0	0	0.347	0.907
MCM2	TOP2A	9606.ENSP00000265056	9606.ENSP00000411532	0	0	0	0	0.811	0.066	0	0.655	0.934
MCM2	CLSPN	9606.ENSP00000265056	9606.ENSP00000312995	0	0	0	0	0.576	0	0.6	0.714	0.947
MCM2	TICRR	9606.ENSP00000265056	9606.ENSP00000268138	0	0	0	0	0.342	0	0	0.937	0.958
MCM2	RRM2	9606.ENSP00000265056	9606.ENSP00000353770	0	0	0	0	0.927	0	0	0.485	0.961
MCM2	CHEK1	9606.ENSP00000265056	9606.ENSP00000388648	0	0	0	0	0.734	0.4	0.65	0.839	0.989
MCM2	MCM10	9606.ENSP00000265056	9606.ENSP00000418268	0	0	0	0	0.816	0.982	0.6	0.994	0.999
MDC1	BOD1L1	9606.ENSP00000365588	9606.ENSP00000040738	0	0	0	0	0.047	0.459	0	0.183	0.542
MDC1	RIF1	9606.ENSP00000365588	9606.ENSP00000243326	0	0	0	0	0.066	0.405	0.6	0.262	0.814
MDC1	LIG1	9606.ENSP00000365588	9606.ENSP00000263274	0	0	0	0	0.181	0	0	0.385	0.475
MDC1	MCM2	9606.ENSP00000365588	9606.ENSP00000265056	0	0	0	0	0.147	0.101	0	0.302	0.418
MDC1	ANLN	9606.ENSP00000365588	9606.ENSP00000265748	0	0	0	0	0.097	0.391	0	0.063	0.44
MDC1	TPX2	9606.ENSP00000365588	9606.ENSP00000300403	0	0	0	0	0.088	0.391	0	0.456	0.671
MDC1	APLF	9606.ENSP00000365588	9606.ENSP00000307004	0	0	0	0	0	0	0	0.461	0.461
MDC1	CLSPN	9606.ENSP00000365588	9606.ENSP00000312995	0	0	0	0	0.082	0	0	0.621	0.638
MDC1	RNF168	9606.ENSP00000365588	9606.ENSP00000320898	0	0	0	0	0.053	0.172	0.6	0.864	0.951
MDC1	ERCC6L	9606.ENSP00000365588	9606.ENSP00000334675	0	0	0	0	0.109	0.164	0	0.316	0.446
MDC1	HNRNPAB	9606.ENSP00000365588	9606.ENSP00000351108	0	0	0	0	0.077	0.415	0	0	0.437
MDC1	TCF20	9606.ENSP00000365588	9606.ENSP00000352463	0	0	0	0	0.085	0.468	0	0.44	0.704
MDC1	ZNF148	9606.ENSP00000365588	9606.ENSP00000353863	0	0	0	0	0	0.471	0	0.054	0.479
MDC1	ATRX	9606.ENSP00000365588	9606.ENSP00000362441	0	0	0	0	0.063	0.164	0	0.466	0.545
MDC1	JMJD1C	9606.ENSP00000365588	9606.ENSP00000382204	0	0	0	0	0	0.27	0	0.295	0.463
MDC1	SUMO1	9606.ENSP00000365588	9606.ENSP00000376077	0	0	0	0	0.065	0.222	0.8	0.407	0.902
MDC1	TOP2A	9606.ENSP00000365588	9606.ENSP00000411532	0	0	0	0	0.11	0.107	0	0.9	0.915
MDC1	CHEK1	9606.ENSP00000365588	9606.ENSP00000388648	0	0	0	0	0.081	0.154	0.9	0.793	0.981
MDC1	RNF4	9606.ENSP00000365588	9606.ENSP00000426503	0	0	0	0	0.062	0.27	0.9	0.812	0.985
MDC1	BRCA1	9606.ENSP00000365588	9606.ENSP00000418960	0	0	0	0	0.062	0.873	0.9	0.935	0.999
MED19	MED26	9606.ENSP00000337340	9606.ENSP00000263390	0	0	0	0	0.076	0.871	0.8	0.831	0.995
MED19	ZC3H13	9606.ENSP00000337340	9606.ENSP00000282007	0	0	0	0	0	0.27	0	0.289	0.459
MED19	TMF1	9606.ENSP00000337340	9606.ENSP00000381567	0	0	0	0	0	0	0	0.402	0.402
MED19	BCLAF1	9606.ENSP00000337340	9606.ENSP00000435210	0	0	0	0	0	0	0.54	0	0.54
MED19	THRAP3	9606.ENSP00000337340	9606.ENSP00000346634	0	0	0	0	0	0	0.6	0.217	0.673
MED26	TCEA1	9606.ENSP00000263390	9606.ENSP00000428426	0	0	0	0.59	0	0.27	0	0.524	0.42
MED26	GTF2F1	9606.ENSP00000263390	9606.ENSP00000377969	0	0	0	0	0.062	0.332	0	0.213	0.463
MED26	SERBP1	9606.ENSP00000263390	9606.ENSP00000360034	0	0	0	0	0	0	0	0.473	0.473
MED26	BCLAF1	9606.ENSP00000263390	9606.ENSP00000435210	0	0	0	0	0.065	0	0.54	0	0.551
MED26	EAF1	9606.ENSP00000263390	9606.ENSP00000380054	0	0	0	0	0	0.289	0	0.435	0.582
MED26	TAF7	9606.ENSP00000263390	9606.ENSP00000312709	0	0	0	0	0.065	0.27	0	0.7	0.777
MED26	THRAP3	9606.ENSP00000263390	9606.ENSP00000346634	0	0	0	0	0	0	0.9	0.066	0.902
MED26	MED19	9606.ENSP00000263390	9606.ENSP00000337340	0	0	0	0	0.076	0.871	0.8	0.831	0.995
MKI67	RAD51AP1	9606.ENSP00000357643	9606.ENSP00000228843	0	0	0	0	0.594	0	0	0.165	0.646
MKI67	MCM2	9606.ENSP00000357643	9606.ENSP00000265056	0	0	0	0	0.593	0	0	0.407	0.748
MKI67	ANLN	9606.ENSP00000357643	9606.ENSP00000265748	0	0	0	0	0.59	0.27	0	0.287	0.768
MKI67	TICRR	9606.ENSP00000357643	9606.ENSP00000268138	0	0	0	0	0.734	0.27	0	0.089	0.808
MKI67	HIRIP3	9606.ENSP00000357643	9606.ENSP00000279392	0	0	0	0	0.106	0	0	0.356	0.401
MKI67	TPX2	9606.ENSP00000357643	9606.ENSP00000300403	0	0	0	0	0.847	0.27	0	0.4	0.927
MKI67	CLSPN	9606.ENSP00000357643	9606.ENSP00000312995	0	0	0	0	0.659	0	0	0.083	0.674
MKI67	SKA3	9606.ENSP00000357643	9606.ENSP00000319417	0	0	0	0	0.58	0	0	0.096	0.605
MKI67	CDCA2	9606.ENSP00000357643	9606.ENSP00000328228	0	0	0	0.541	0.61	0	0	0.255	0.65
MKI67	ERCC6L	9606.ENSP00000357643	9606.ENSP00000334675	0	0	0	0	0.568	0	0	0.112	0.6
MKI67	EIF4EBP1	9606.ENSP00000357643	9606.ENSP00000340691	0	0	0	0	0.098	0	0	0.4	0.435
MKI67	RRM2	9606.ENSP00000357643	9606.ENSP00000353770	0	0	0	0	0.923	0	0	0.596	0.967
MKI67	CXCR4	9606.ENSP00000357643	9606.ENSP00000386884	0	0	0	0	0.062	0	0	0.39	0.404
MKI67	INCENP	9606.ENSP00000357643	9606.ENSP00000378295	0	0	0	0	0.497	0	0	0.099	0.528
MKI67	BRCA1	9606.ENSP00000357643	9606.ENSP00000418960	0	0	0	0	0.389	0.128	0	0.422	0.665
MKI67	CHEK1	9606.ENSP00000357643	9606.ENSP00000388648	0	0	0	0	0.564	0	0	0.301	0.683
MKI67	CDCA3	9606.ENSP00000357643	9606.ENSP00000442068	0	0	0	0	0.728	0	0	0.364	0.82
MKI67	MCM10	9606.ENSP00000357643	9606.ENSP00000418268	0	0	0	0	0.793	0	0	0.316	0.852
MKI67	NUSAP1	9606.ENSP00000357643	9606.ENSP00000453403	0	0	0	0	0.964	0	0	0.469	0.98
MKI67	TOP2A	9606.ENSP00000357643	9606.ENSP00000411532	0	0	0	0	0.966	0	0	0.66	0.988
MYB	TCF3	9606.ENSP00000339992	9606.ENSP00000262965	0	0	0	0	0.085	0	0.6	0.422	0.77
MYB	TAL1	9606.ENSP00000339992	9606.ENSP00000294339	0	0	0	0	0.062	0.27	0.8	0.75	0.961
MYB	SRRM2	9606.ENSP00000339992	9606.ENSP00000301740	0	0	0	0	0.064	0.345	0	0.115	0.41
MYB	CWC25	9606.ENSP00000339992	9606.ENSP00000478070	0	0	0	0	0.066	0.369	0	0.144	0.451
MYB	SUMO1	9606.ENSP00000339992	9606.ENSP00000376077	0	0	0	0	0.051	0.27	0	0.314	0.483
MYB	TCF12	9606.ENSP00000339992	9606.ENSP00000388940	0	0	0	0	0.064	0	0.6	0.31	0.719
MYB	GTF2F1	9606.ENSP00000339992	9606.ENSP00000377969	0	0	0	0	0.084	0	0.9	0.101	0.91
NACA	RPLP2	9606.ENSP00000448035	9606.ENSP00000322419	0	0	0	0	0.877	0	0	0.062	0.88
NACA	YBX1	9606.ENSP00000448035	9606.ENSP00000361626	0	0	0	0	0.349	0.79	0	0.052	0.859
NACA	BTF3	9606.ENSP00000448035	9606.ENSP00000369965	0	0	0	0	0.737	0.987	0.54	0.466	0.999
NACA	EEF1B2	9606.ENSP00000448035	9606.ENSP00000376056	0	0	0	0	0.654	0.056	0	0.415	0.792
NASP	TOP2A	9606.ENSP00000255120	9606.ENSP00000411532	0	0	0	0	0.307	0	0	0.302	0.496
NASP	PTMA	9606.ENSP00000255120	9606.ENSP00000344547	0	0	0	0	0.401	0	0	0.269	0.543
NASP	TOP2B	9606.ENSP00000255120	9606.ENSP00000396704	0	0	0	0	0.183	0	0	0.475	0.553
NASP	RRM2	9606.ENSP00000255120	9606.ENSP00000353770	0	0	0	0	0.529	0	0	0.227	0.621
NASP	LIG1	9606.ENSP00000255120	9606.ENSP00000263274	0	0	0	0	0.84	0	0	0.043	0.84
NASP	MCM2	9606.ENSP00000255120	9606.ENSP00000265056	0	0	0	0	0.906	0	0	0.363	0.938
NASP	SLBP	9606.ENSP00000255120	9606.ENSP00000417686	0	0	0	0	0.924	0	0	0.828	0.986
NOL7	PSME3	9606.ENSP00000405674	9606.ENSP00000293362	0	0	0	0	0.903	0	0	0.124	0.912
NOL7	DKC1	9606.ENSP00000405674	9606.ENSP00000358563	0	0	0	0	0.765	0	0	0	0.765
NOL7	GNL3	9606.ENSP00000405674	9606.ENSP00000395772	0	0	0	0	0.495	0	0	0.326	0.645
NOLC1	GLTSCR2	9606.ENSP00000385410	9606.ENSP00000246802	0	0	0	0	0.51	0	0	0.561	0.776
NOLC1	PHAX	9606.ENSP00000385410	9606.ENSP00000297540	0	0	0	0	0.137	0	0	0.656	0.692
NOLC1	SRRM1	9606.ENSP00000385410	9606.ENSP00000326261	0	0	0	0	0.072	0.272	0	0.328	0.506
NOLC1	DDX21	9606.ENSP00000385410	9606.ENSP00000346120	0	0	0	0	0.611	0.086	0	0.287	0.724
NOLC1	HNRNPAB	9606.ENSP00000385410	9606.ENSP00000351108	0	0	0	0	0.405	0.058	0	0.048	0.42
NOLC1	RRP15	9606.ENSP00000385410	9606.ENSP00000355899	0	0	0	0	0.791	0.126	0	0	0.809
NOLC1	DKC1	9606.ENSP00000385410	9606.ENSP00000358563	0	0	0	0	0.862	0.6	0.36	0.944	0.997
NOLC1	TCOF1	9606.ENSP00000385410	9606.ENSP00000367028	0	0	0	0.552	0.126	0.633	0	0.905	0.8
NOLC1	SRSF5	9606.ENSP00000385410	9606.ENSP00000452123	0	0	0	0	0.078	0	0	0.449	0.47
NOLC1	GPATCH4	9606.ENSP00000385410	9606.ENSP00000396441	0	0	0	0	0.363	0.258	0	0.14	0.558
NOLC1	NOP14	9606.ENSP00000385410	9606.ENSP00000405068	0	0	0	0	0.7	0	0	0.154	0.735
NOLC1	FTSJ3	9606.ENSP00000385410	9606.ENSP00000396673	0	0	0	0	0.859	0	0	0.048	0.86
NOLC1	GNL3	9606.ENSP00000385410	9606.ENSP00000395772	0	0	0	0	0.824	0	0	0.506	0.909
NOP14	GLTSCR2	9606.ENSP00000405068	9606.ENSP00000246802	0	0	0	0	0.872	0	0	0.105	0.881
NOP14	DDX21	9606.ENSP00000405068	9606.ENSP00000346120	0	0	0	0	0.512	0.153	0	0.148	0.617
NOP14	RRP15	9606.ENSP00000405068	9606.ENSP00000355899	0	0	0	0	0.831	0	0	0.308	0.878
NOP14	DKC1	9606.ENSP00000405068	9606.ENSP00000358563	0	0	0	0	0.819	0	0	0.167	0.843
NOP14	NOLC1	9606.ENSP00000405068	9606.ENSP00000385410	0	0	0	0	0.7	0	0	0.154	0.735
NOP14	EIF4B	9606.ENSP00000405068	9606.ENSP00000388806	0	0	0	0	0.458	0	0	0.067	0.472
NOP14	GNL3	9606.ENSP00000405068	9606.ENSP00000395772	0	0	0	0	0.816	0.386	0	0.101	0.889
NOP14	GPATCH4	9606.ENSP00000405068	9606.ENSP00000396441	0	0	0	0	0.524	0.313	0	0	0.659
NOP14	FTSJ3	9606.ENSP00000405068	9606.ENSP00000396673	0	0	0	0	0.887	0.369	0.9	0	0.992
NOP14	DNTTIP2	9606.ENSP00000405068	9606.ENSP00000411010	0	0	0	0	0.45	0.798	0	0.451	0.933
NUCKS1	PHAX	9606.ENSP00000356110	9606.ENSP00000297540	0	0	0	0	0.059	0.835	0	0	0.838
NUFIP2	BTF3	9606.ENSP00000225388	9606.ENSP00000369965	0	0	0	0	0.087	0	0.54	0	0.562
NUFIP2	BAG3	9606.ENSP00000225388	9606.ENSP00000358081	0	0	0	0	0.06	0	0	0.569	0.578
NUFIP2	GPATCH4	9606.ENSP00000225388	9606.ENSP00000396441	0	0	0	0	0.046	0	0	0.618	0.62
NUFIP2	CAPRIN1	9606.ENSP00000225388	9606.ENSP00000340329	0	0	0	0	0.085	0.402	0	0.396	0.641
NUFIP2	ATXN2	9606.ENSP00000225388	9606.ENSP00000366843	0	0	0	0	0.047	0.628	0	0.185	0.685
NUFIP2	LARP4B	9606.ENSP00000225388	9606.ENSP00000482767	0	0	0	0	0.105	0	0.72	0	0.738
NUFIP2	ABCF1	9606.ENSP00000225388	9606.ENSP00000313603	0	0	0	0	0.079	0	0.72	0.136	0.757
NUP35	CASC3	9606.ENSP00000295119	9606.ENSP00000264645	0	0	0	0	0	0	0.6	0	0.6
NUP35	RRP15	9606.ENSP00000295119	9606.ENSP00000355899	0	0	0	0	0.282	0	0	0.491	0.619
NUP35	SRRM1	9606.ENSP00000295119	9606.ENSP00000326261	0	0	0	0	0.096	0	0.6	0	0.623
NUP35	SUMO1	9606.ENSP00000295119	9606.ENSP00000376077	0	0	0	0	0.132	0	0.6	0.058	0.644
NUP35	TOP2A	9606.ENSP00000295119	9606.ENSP00000411532	0	0	0	0	0.066	0	0.9	0.073	0.905
NUP35	PHAX	9606.ENSP00000295119	9606.ENSP00000297540	0	0	0	0	0.092	0	0.9	0	0.905
NUP35	TPR	9606.ENSP00000295119	9606.ENSP00000356448	0	0	0	0	0.127	0	0.8	0.505	0.906
NUP35	FIP1L1	9606.ENSP00000295119	9606.ENSP00000336752	0	0	0	0	0.146	0	0.9	0	0.911
NUP35	INCENP	9606.ENSP00000295119	9606.ENSP00000378295	0	0	0	0	0.123	0	0.9	0.074	0.911
NUP35	SLBP	9606.ENSP00000295119	9606.ENSP00000417686	0	0	0	0	0.233	0	0.9	0	0.92
NUP35	AHCTF1	9606.ENSP00000295119	9606.ENSP00000355465	0	0	0	0	0.081	0.39	0.6	0.826	0.955
NUSAP1	RAD51AP1	9606.ENSP00000453403	9606.ENSP00000228843	0	0	0	0	0.796	0	0	0.352	0.862
NUSAP1	MCM2	9606.ENSP00000453403	9606.ENSP00000265056	0	0	0	0	0.795	0	0	0.394	0.87
NUSAP1	ANLN	9606.ENSP00000453403	9606.ENSP00000265748	0	0	0	0	0.811	0	0	0.363	0.874
NUSAP1	TMPO	9606.ENSP00000453403	9606.ENSP00000266732	0	0	0	0	0.56	0.198	0	0.326	0.741
NUSAP1	TICRR	9606.ENSP00000453403	9606.ENSP00000268138	0	0	0	0	0.56	0	0	0.168	0.619
NUSAP1	TPX2	9606.ENSP00000453403	9606.ENSP00000300403	0	0	0	0	0.913	0	0	0.661	0.969
NUSAP1	CLSPN	9606.ENSP00000453403	9606.ENSP00000312995	0	0	0	0	0.386	0	0	0.22	0.501
NUSAP1	SKA3	9606.ENSP00000453403	9606.ENSP00000319417	0	0	0	0	0.614	0	0	0.12	0.646
NUSAP1	CDCA2	9606.ENSP00000453403	9606.ENSP00000328228	0	0	0	0	0.702	0	0	0.403	0.814
NUSAP1	ERCC6L	9606.ENSP00000453403	9606.ENSP00000334675	0	0	0	0	0.562	0	0	0.262	0.663
NUSAP1	RRM2	9606.ENSP00000453403	9606.ENSP00000353770	0	0	0	0	0.924	0	0	0.595	0.968
NUSAP1	MKI67	9606.ENSP00000453403	9606.ENSP00000357643	0	0	0	0	0.964	0	0	0.469	0.98
NUSAP1	INCENP	9606.ENSP00000453403	9606.ENSP00000378295	0	0	0	0	0.926	0	0	0.277	0.944
NUSAP1	CHEK1	9606.ENSP00000453403	9606.ENSP00000388648	0	0	0	0	0.821	0	0	0.246	0.859
NUSAP1	STMN1	9606.ENSP00000453403	9606.ENSP00000410452	0	0	0	0	0.298	0	0	0.333	0.511
NUSAP1	TOP2A	9606.ENSP00000453403	9606.ENSP00000411532	0	0	0	0	0.966	0	0	0.649	0.987
NUSAP1	SLBP	9606.ENSP00000453403	9606.ENSP00000417686	0	0	0	0	0.553	0	0	0.23	0.641
NUSAP1	MCM10	9606.ENSP00000453403	9606.ENSP00000418268	0	0	0	0	0.785	0	0	0.341	0.852
NUSAP1	BRCA1	9606.ENSP00000453403	9606.ENSP00000418960	0	0	0	0	0.408	0	0	0.234	0.527
NUSAP1	CDCA3	9606.ENSP00000453403	9606.ENSP00000442068	0	0	0	0	0.883	0	0	0.511	0.94
OTUD5	RCSD1	9606.ENSP00000156084	9606.ENSP00000356828	0	0	0	0	0	0	0	0.552	0.552
PATL1	TOP2A	9606.ENSP00000300146	9606.ENSP00000411532	0	0	0	0	0.063	0.331	0	0.142	0.416
PATL1	SART1	9606.ENSP00000300146	9606.ENSP00000310448	0	0	0	0	0.082	0.271	0	0.199	0.418
PATL1	ATXN2	9606.ENSP00000300146	9606.ENSP00000366843	0	0	0	0	0.066	0	0	0.445	0.46
PATL1	LARP1	9606.ENSP00000300146	9606.ENSP00000336721	0	0	0	0	0.067	0.061	0	0.578	0.598
PATL1	EIF4ENIF1	9606.ENSP00000300146	9606.ENSP00000380659	0	0	0	0	0.096	0.258	0	0.759	0.824
PDLIM5	SPECC1	9606.ENSP00000480359	9606.ENSP00000261503	0	0	0	0	0.062	0.149	0.54	0.059	0.608
PDLIM5	EIF4ENIF1	9606.ENSP00000480359	9606.ENSP00000380659	0	0	0	0	0	0	0	0.456	0.456
PHACTR4	LARP4B	9606.ENSP00000362942	9606.ENSP00000482767	0	0	0	0	0	0	0	0.515	0.515
PHACTR4	GPATCH4	9606.ENSP00000362942	9606.ENSP00000396441	0	0	0	0	0	0	0	0.556	0.556
PHAX	NUP35	9606.ENSP00000297540	9606.ENSP00000295119	0	0	0	0	0.092	0	0.9	0	0.905
PHAX	SLBP	9606.ENSP00000297540	9606.ENSP00000417686	0	0	0	0	0.146	0	0	0.337	0.409
PHAX	HNRNPAB	9606.ENSP00000297540	9606.ENSP00000351108	0	0	0	0	0.062	0	0	0.419	0.432
PHAX	PJA2	9606.ENSP00000297540	9606.ENSP00000354775	0	0	0	0	0.344	0	0	0.254	0.49
PHAX	ZC3H18	9606.ENSP00000297540	9606.ENSP00000416951	0	0	0	0	0.273	0	0	0.392	0.539
PHAX	DKC1	9606.ENSP00000297540	9606.ENSP00000358563	0	0	0	0	0.069	0	0	0.536	0.549
PHAX	C17orf85	9606.ENSP00000297540	9606.ENSP00000373657	0	0	0	0	0.107	0.27	0	0.564	0.691
PHAX	NOLC1	9606.ENSP00000297540	9606.ENSP00000385410	0	0	0	0	0.137	0	0	0.656	0.692
PHAX	NUCKS1	9606.ENSP00000297540	9606.ENSP00000356110	0	0	0	0	0.059	0.835	0	0	0.838
PHAX	TPR	9606.ENSP00000297540	9606.ENSP00000356448	0	0	0	0	0.086	0	0.9	0	0.904
PHAX	SRRT	9606.ENSP00000297540	9606.ENSP00000480421	0	0	0	0	0.132	0	0.8	0.977	0.995
PJA2	PHAX	9606.ENSP00000354775	9606.ENSP00000297540	0	0	0	0	0.344	0	0	0.254	0.49
POLR3G	BDP1	9606.ENSP00000382058	9606.ENSP00000351575	0	0	0	0	0	0	0.6	0.529	0.803
PPIG	THOC2	9606.ENSP00000260970	9606.ENSP00000245838	0	0	0	0	0.525	0.151	0	0	0.579
PPIG	SRSF2	9606.ENSP00000260970	9606.ENSP00000376276	0	0	0	0	0.157	0.078	0	0.309	0.416
PPIG	ZC3H18	9606.ENSP00000260970	9606.ENSP00000416951	0	0	0	0	0.157	0.413	0	0	0.484
PPIG	ATRX	9606.ENSP00000260970	9606.ENSP00000362441	0	0	0	0	0.254	0.077	0	0.697	0.773
PPIG	CASC3	9606.ENSP00000260970	9606.ENSP00000264645	0	0	0	0	0	0.8	0	0.043	0.8
PPIG	CWC25	9606.ENSP00000260970	9606.ENSP00000478070	0	0	0	0	0.085	0.8	0	0.087	0.818
PPIG	SRRM2	9606.ENSP00000260970	9606.ENSP00000301740	0	0	0	0	0.126	0.826	0	0.099	0.851
PPP1R35	RCSD1	9606.ENSP00000292330	9606.ENSP00000356828	0	0	0	0	0	0	0	0.68	0.68
PRRC2A	CCDC86	9606.ENSP00000365201	9606.ENSP00000227520	0	0	0	0	0.064	0	0	0.535	0.546
PRRC2A	ZFAND2B	9606.ENSP00000365201	9606.ENSP00000289528	0	0	0	0	0	0.392	0	0.21	0.499
PRRC2A	PRRC2C	9606.ENSP00000365201	9606.ENSP00000343629	0	0	0	0.651	0.047	0.459	0	0.447	0.542
PRRC2A	WAC	9606.ENSP00000365201	9606.ENSP00000346986	0	0	0	0	0.074	0	0	0.474	0.492
PRRC2A	TCOF1	9606.ENSP00000365201	9606.ENSP00000367028	0	0	0	0	0.102	0	0	0.385	0.424
PRRC2A	UBAP2L	9606.ENSP00000365201	9606.ENSP00000389445	0	0	0	0	0.136	0.442	0	0.235	0.599
PRRC2B	BRD8	9606.ENSP00000349856	9606.ENSP00000254900	0	0	0	0	0.064	0	0	0.44	0.454
PRRC2B	KMT2D	9606.ENSP00000349856	9606.ENSP00000301067	0	0	0	0	0.672	0	0	0.107	0.694
PRRC2B	ATXN2	9606.ENSP00000349856	9606.ENSP00000366843	0	0	0	0	0.089	0.375	0	0.086	0.434
PRRC2C	ZC3H13	9606.ENSP00000343629	9606.ENSP00000282007	0	0	0	0	0.652	0	0	0.067	0.661
PRRC2C	CAPRIN1	9606.ENSP00000343629	9606.ENSP00000340329	0	0	0	0	0.111	0.367	0	0	0.413
PRRC2C	LARP4B	9606.ENSP00000343629	9606.ENSP00000482767	0	0	0	0	0.044	0.409	0	0	0.41
PRRC2C	UBAP2L	9606.ENSP00000343629	9606.ENSP00000389445	0	0	0	0	0.14	0.292	0	0.253	0.506
PRRC2C	PRRC2A	9606.ENSP00000343629	9606.ENSP00000365201	0	0	0	0.651	0.047	0.459	0	0.447	0.542
PRRC2C	ANKRD17	9606.ENSP00000343629	9606.ENSP00000351416	0	0	0	0	0.327	0.421	0	0	0.593
PRRC2C	SON	9606.ENSP00000343629	9606.ENSP00000348984	0	0	0	0	0.615	0	0	0	0.615
PRRC2C	ZC3H11A	9606.ENSP00000343629	9606.ENSP00000438527	0	0	0	0	0.139	0	0	0.604	0.644
PSIP1	GPBP1	9606.ENSP00000370109	9606.ENSP00000264779	0	0	0	0	0.084	0	0	0.441	0.466
PSIP1	KMT2D	9606.ENSP00000370109	9606.ENSP00000301067	0	0	0	0	0.084	0.056	0	0.571	0.596
PSIP1	SON	9606.ENSP00000370109	9606.ENSP00000348984	0	0	0	0	0.062	0.271	0	0.354	0.519
PSIP1	SERBP1	9606.ENSP00000370109	9606.ENSP00000360034	0	0	0	0	0.152	0.27	0	0.427	0.614
PSIP1	SUMO1	9606.ENSP00000370109	9606.ENSP00000376077	0	0	0	0	0.065	0.27	0	0.232	0.431
PSIP1	CXCR4	9606.ENSP00000370109	9606.ENSP00000386884	0	0	0	0	0	0.209	0	0.345	0.459
PSIP1	ZC3H18	9606.ENSP00000370109	9606.ENSP00000416951	0	0	0	0	0.055	0.489	0	0	0.496
PSME3	ZFAND2B	9606.ENSP00000293362	9606.ENSP00000289528	0	0	0	0	0	0.105	0	0.388	0.429
PSME3	SUMO1	9606.ENSP00000293362	9606.ENSP00000376077	0	0	0	0	0.288	0	0	0.217	0.418
PSME3	HNRNPAB	9606.ENSP00000293362	9606.ENSP00000351108	0	0	0	0	0.33	0.089	0	0.17	0.449
PSME3	EAF1	9606.ENSP00000293362	9606.ENSP00000380054	0	0	0	0	0	0.457	0	0	0.457
PSME3	SRRT	9606.ENSP00000293362	9606.ENSP00000480421	0	0	0	0	0.304	0.272	0	0.047	0.474
PSME3	DNTTIP2	9606.ENSP00000293362	9606.ENSP00000411010	0	0	0	0	0.48	0	0	0	0.48
PSME3	SF1	9606.ENSP00000293362	9606.ENSP00000366604	0	0	0	0	0.247	0	0	0.557	0.652
PSME3	BCLAF1	9606.ENSP00000293362	9606.ENSP00000435210	0	0	0	0	0.273	0.27	0	0.562	0.747
PSME3	DKC1	9606.ENSP00000293362	9606.ENSP00000358563	0	0	0	0	0.823	0	0	0	0.823
PSME3	NOL7	9606.ENSP00000293362	9606.ENSP00000405674	0	0	0	0	0.903	0	0	0.124	0.912
PSME3	HNRNPD	9606.ENSP00000293362	9606.ENSP00000313199	0	0	0	0	0.161	0.089	0.9	0.148	0.926
PTMA	C11orf58	9606.ENSP00000344547	9606.ENSP00000228136	0	0	0	0	0.157	0.272	0	0.522	0.681
PTMA	NASP	9606.ENSP00000344547	9606.ENSP00000255120	0	0	0	0	0.401	0	0	0.269	0.543
PTMA	GNL3	9606.ENSP00000344547	9606.ENSP00000395772	0	0	0	0	0.089	0	0	0.389	0.42
PTMA	TMSB4X	9606.ENSP00000344547	9606.ENSP00000370010	0	0	0	0	0.063	0	0	0.473	0.485
PTMA	SRSF2	9606.ENSP00000344547	9606.ENSP00000376276	0	0	0	0	0.212	0.618	0	0	0.686
RAD23A	LIG1	9606.ENSP00000467024	9606.ENSP00000263274	0	0	0	0	0.064	0.726	0	0.393	0.83
RAD23A	ERCC6L	9606.ENSP00000467024	9606.ENSP00000334675	0	0	0	0	0	0.203	0	0.293	0.412
RAD23A	BCL11A	9606.ENSP00000467024	9606.ENSP00000338774	0	0	0	0	0	0.077	0	0.434	0.455
RAD23A	EPS15	9606.ENSP00000467024	9606.ENSP00000360798	0	0	0	0	0.049	0.4	0	0.26	0.541
RAD23A	SUMO1	9606.ENSP00000467024	9606.ENSP00000376077	0	0	0	0	0.097	0.076	0.6	0.346	0.752
RAD23A	CHEK1	9606.ENSP00000467024	9606.ENSP00000388648	0	0	0	0	0	0.27	0	0.238	0.42
RAD51AP1	TMPO	9606.ENSP00000228843	9606.ENSP00000266732	0	0	0	0	0.432	0	0	0.06	0.444
RAD51AP1	ATRX	9606.ENSP00000228843	9606.ENSP00000362441	0	0	0	0	0.062	0	0	0.493	0.504
RAD51AP1	CDCA3	9606.ENSP00000228843	9606.ENSP00000442068	0	0	0	0	0.34	0	0	0.292	0.513
RAD51AP1	CLSPN	9606.ENSP00000228843	9606.ENSP00000312995	0	0	0	0	0.451	0	0	0.19	0.536
RAD51AP1	ERCC6L	9606.ENSP00000228843	9606.ENSP00000334675	0	0	0	0	0.55	0	0	0.108	0.581
RAD51AP1	SKA3	9606.ENSP00000228843	9606.ENSP00000319417	0	0	0	0	0.572	0	0	0.135	0.614
RAD51AP1	CDCA2	9606.ENSP00000228843	9606.ENSP00000328228	0	0	0	0	0.561	0	0	0.203	0.635
RAD51AP1	MKI67	9606.ENSP00000228843	9606.ENSP00000357643	0	0	0	0	0.594	0	0	0.165	0.646
RAD51AP1	MCM2	9606.ENSP00000228843	9606.ENSP00000265056	0	0	0	0	0.694	0	0	0.331	0.787
RAD51AP1	ANLN	9606.ENSP00000228843	9606.ENSP00000265748	0	0	0	0	0.778	0	0	0.134	0.799
RAD51AP1	RRM2	9606.ENSP00000228843	9606.ENSP00000353770	0	0	0	0	0.792	0	0	0.198	0.826
RAD51AP1	CHEK1	9606.ENSP00000228843	9606.ENSP00000388648	0	0	0	0	0.767	0	0	0.287	0.827
RAD51AP1	MCM10	9606.ENSP00000228843	9606.ENSP00000418268	0	0	0	0	0.783	0	0	0.262	0.833
RAD51AP1	TPX2	9606.ENSP00000228843	9606.ENSP00000300403	0	0	0	0	0.802	0	0	0.218	0.838
RAD51AP1	BRCA1	9606.ENSP00000228843	9606.ENSP00000418960	0	0	0	0	0.368	0	0.6	0.459	0.851
RAD51AP1	NUSAP1	9606.ENSP00000228843	9606.ENSP00000453403	0	0	0	0	0.796	0	0	0.352	0.862
RAD51AP1	TOP2A	9606.ENSP00000228843	9606.ENSP00000411532	0	0	0	0	0.824	0	0	0.525	0.913
RAI1	TCF20	9606.ENSP00000323074	9606.ENSP00000352463	0	0	0	0.576	0.087	0.647	0	0.598	0.746
RANBP3	TMPO	9606.ENSP00000341483	9606.ENSP00000266732	0	0	0	0	0.182	0	0	0.558	0.622
RANBP3	SF1	9606.ENSP00000341483	9606.ENSP00000366604	0	0	0	0	0.273	0.244	0	0	0.426
RBM3	CAPRIN1	9606.ENSP00000365950	9606.ENSP00000340329	0	0	0	0	0.112	0.322	0	0.097	0.409
RCSD1	OTUD5	9606.ENSP00000356828	9606.ENSP00000156084	0	0	0	0	0	0	0	0.552	0.552
RCSD1	PPP1R35	9606.ENSP00000356828	9606.ENSP00000292330	0	0	0	0	0	0	0	0.68	0.68
RERE	TCEA1	9606.ENSP00000338629	9606.ENSP00000428426	0	0	0	0	0	0	0	0.413	0.412
RERE	BCL11A	9606.ENSP00000338629	9606.ENSP00000338774	0	0	0	0	0	0.066	0	0.43	0.444
RIF1	SUMO1	9606.ENSP00000243326	9606.ENSP00000376077	0	0	0	0	0.062	0	0.6	0	0.608
RIF1	RNF168	9606.ENSP00000243326	9606.ENSP00000320898	0	0	0	0	0.091	0	0.6	0.305	0.725
RIF1	MDC1	9606.ENSP00000243326	9606.ENSP00000365588	0	0	0	0	0.066	0.405	0.6	0.262	0.814
RIF1	BDP1	9606.ENSP00000243326	9606.ENSP00000351575	0	0	0	0	0.831	0	0	0	0.831
RIF1	BRCA1	9606.ENSP00000243326	9606.ENSP00000418960	0	0	0	0	0.092	0.405	0.65	0.298	0.849
RIF1	MCM2	9606.ENSP00000243326	9606.ENSP00000265056	0	0	0	0	0.85	0	0	0.206	0.876
RNF168	RIF1	9606.ENSP00000320898	9606.ENSP00000243326	0	0	0	0	0.091	0	0.6	0.305	0.725
RNF168	CLSPN	9606.ENSP00000320898	9606.ENSP00000312995	0	0	0	0	0.085	0	0	0.478	0.503
RNF168	JMJD1C	9606.ENSP00000320898	9606.ENSP00000382204	0	0	0	0	0	0.27	0	0.227	0.411
RNF168	TOP2A	9606.ENSP00000320898	9606.ENSP00000411532	0	0	0	0	0	0.27	0	0.312	0.477
RNF168	CHEK1	9606.ENSP00000320898	9606.ENSP00000388648	0	0	0	0	0.108	0	0	0.525	0.559
RNF168	SUMO1	9606.ENSP00000320898	9606.ENSP00000376077	0	0	0	0	0	0.27	0.8	0.416	0.907
RNF168	MDC1	9606.ENSP00000320898	9606.ENSP00000365588	0	0	0	0	0.053	0.172	0.6	0.864	0.951
RNF168	RNF4	9606.ENSP00000320898	9606.ENSP00000426503	0	0	0	0	0.064	0.27	0.9	0.518	0.962
RNF168	BRCA1	9606.ENSP00000320898	9606.ENSP00000418960	0	0	0	0	0.082	0.647	0.6	0.837	0.976
RNF4	CENPC	9606.ENSP00000426503	9606.ENSP00000273853	0	0	0	0	0	0.27	0	0.22	0.406
RNF4	SART1	9606.ENSP00000426503	9606.ENSP00000310448	0	0	0	0	0.053	0.486	0	0.141	0.545
RNF4	RNF168	9606.ENSP00000426503	9606.ENSP00000320898	0	0	0	0	0.064	0.27	0.9	0.518	0.962
RNF4	TCF20	9606.ENSP00000426503	9606.ENSP00000352463	0	0	0	0	0.062	0.486	0	0.716	0.851
RNF4	MDC1	9606.ENSP00000426503	9606.ENSP00000365588	0	0	0	0	0.062	0.27	0.9	0.812	0.985
RNF4	SUMO1	9606.ENSP00000426503	9606.ENSP00000376077	0	0	0	0	0	0.9	0.9	0.824	0.998
RNF4	BRCA1	9606.ENSP00000426503	9606.ENSP00000418960	0	0	0	0	0	0	0.9	0.469	0.944
RPLP2	DKC1	9606.ENSP00000322419	9606.ENSP00000358563	0	0	0	0	0.184	0.252	0	0.107	0.407
RPLP2	SLC16A1	9606.ENSP00000322419	9606.ENSP00000441065	0	0	0	0	0.049	0	0	0.441	0.446
RPLP2	SUMO1	9606.ENSP00000322419	9606.ENSP00000376077	0	0	0	0	0.278	0.161	0	0.163	0.449
RPLP2	RRP15	9606.ENSP00000322419	9606.ENSP00000355899	0	0	0	0	0.107	0	0	0.424	0.464
RPLP2	BTF3	9606.ENSP00000322419	9606.ENSP00000369965	0	0	0	0	0.595	0.567	0	0.101	0.828
RPLP2	NACA	9606.ENSP00000322419	9606.ENSP00000448035	0	0	0	0	0.877	0	0	0.062	0.88
RPLP2	SERBP1	9606.ENSP00000322419	9606.ENSP00000360034	0	0	0	0	0.201	0.955	0	0	0.962
RPLP2	EEF1B2	9606.ENSP00000322419	9606.ENSP00000376056	0.045	0	0	0	0.95	0.895	0	0.412	0.996
RRBP1	TMPO	9606.ENSP00000367038	9606.ENSP00000266732	0	0	0	0	0	0.471	0	0	0.471
RRM2	RAD51AP1	9606.ENSP00000353770	9606.ENSP00000228843	0	0	0	0	0.792	0	0	0.198	0.826
RRM2	SRSF9	9606.ENSP00000353770	9606.ENSP00000229390	0	0	0	0	0.114	0.139	0	0.535	0.615
RRM2	SNRPC	9606.ENSP00000353770	9606.ENSP00000244520	0	0	0	0	0.151	0	0	0.489	0.549
RRM2	NASP	9606.ENSP00000353770	9606.ENSP00000255120	0	0	0	0	0.529	0	0	0.227	0.621
RRM2	LIG1	9606.ENSP00000353770	9606.ENSP00000263274	0	0	0	0	0.58	0	0	0.043	0.581
RRM2	MCM2	9606.ENSP00000353770	9606.ENSP00000265056	0	0	0	0	0.927	0	0	0.485	0.961
RRM2	ANLN	9606.ENSP00000353770	9606.ENSP00000265748	0	0	0	0	0.794	0	0	0.369	0.865
RRM2	TMPO	9606.ENSP00000353770	9606.ENSP00000266732	0	0	0	0	0.553	0	0	0.139	0.599
RRM2	TICRR	9606.ENSP00000353770	9606.ENSP00000268138	0	0	0	0	0.558	0	0	0.141	0.604
RRM2	TPX2	9606.ENSP00000353770	9606.ENSP00000300403	0	0	0	0	0.923	0	0	0.414	0.953
RRM2	CLSPN	9606.ENSP00000353770	9606.ENSP00000312995	0	0	0	0	0.441	0	0	0.294	0.589
RRM2	HNRNPD	9606.ENSP00000353770	9606.ENSP00000313199	0	0	0	0	0.071	0	0	0.542	0.557
RRM2	SKA3	9606.ENSP00000353770	9606.ENSP00000319417	0	0	0	0	0.576	0	0	0	0.576
RRM2	CDCA2	9606.ENSP00000353770	9606.ENSP00000328228	0	0	0	0	0.592	0	0	0.112	0.622
RRM2	ERCC6L	9606.ENSP00000353770	9606.ENSP00000334675	0	0	0	0	0.552	0.056	0	0.125	0.598
RRM2	STMN1	9606.ENSP00000353770	9606.ENSP00000410452	0	0	0	0	0.284	0	0	0.23	0.426
RRM2	SRSF2	9606.ENSP00000353770	9606.ENSP00000376276	0	0	0	0	0.142	0.173	0	0.268	0.435
RRM2	SLBP	9606.ENSP00000353770	9606.ENSP00000417686	0	0	0	0	0.548	0	0	0.293	0.667
RRM2	BRCA1	9606.ENSP00000353770	9606.ENSP00000418960	0	0	0	0	0.409	0	0	0.525	0.708
RRM2	MCM10	9606.ENSP00000353770	9606.ENSP00000418268	0	0	0	0	0.803	0	0	0.473	0.892
RRM2	CDCA3	9606.ENSP00000353770	9606.ENSP00000442068	0	0	0	0	0.861	0	0	0.282	0.896
RRM2	CHEK1	9606.ENSP00000353770	9606.ENSP00000388648	0	0	0	0	0.8	0.137	0	0.649	0.934
RRM2	MKI67	9606.ENSP00000353770	9606.ENSP00000357643	0	0	0	0	0.923	0	0	0.596	0.967
RRM2	NUSAP1	9606.ENSP00000353770	9606.ENSP00000453403	0	0	0	0	0.924	0	0	0.595	0.968
RRM2	TOP2A	9606.ENSP00000353770	9606.ENSP00000411532	0	0	0	0	0.935	0	0	0.671	0.978
RRP15	GLTSCR2	9606.ENSP00000355899	9606.ENSP00000246802	0	0	0	0	0.863	0	0	0.229	0.89
RRP15	NUP35	9606.ENSP00000355899	9606.ENSP00000295119	0	0	0	0	0.282	0	0	0.491	0.619
RRP15	RPLP2	9606.ENSP00000355899	9606.ENSP00000322419	0	0	0	0	0.107	0	0	0.424	0.464
RRP15	DDX21	9606.ENSP00000355899	9606.ENSP00000346120	0	0	0	0	0.361	0.16	0	0.101	0.475
RRP15	SREK1IP1	9606.ENSP00000355899	9606.ENSP00000427401	0	0	0	0	0	0	0	0.416	0.416
RRP15	HDGF	9606.ENSP00000355899	9606.ENSP00000357189	0	0	0	0	0.045	0	0	0.463	0.465
RRP15	GPATCH4	9606.ENSP00000355899	9606.ENSP00000396441	0	0	0	0	0.448	0.09	0	0	0.477
RRP15	DKC1	9606.ENSP00000355899	9606.ENSP00000358563	0	0	0	0	0.674	0	0	0.044	0.675
RRP15	NOLC1	9606.ENSP00000355899	9606.ENSP00000385410	0	0	0	0	0.791	0.126	0	0	0.809
RRP15	DNTTIP2	9606.ENSP00000355899	9606.ENSP00000411010	0	0	0	0	0.857	0	0	0	0.857
RRP15	GNL3	9606.ENSP00000355899	9606.ENSP00000395772	0	0	0	0	0.822	0	0	0.245	0.86
RRP15	NOP14	9606.ENSP00000355899	9606.ENSP00000405068	0	0	0	0	0.831	0	0	0.308	0.878
RRP15	FTSJ3	9606.ENSP00000355899	9606.ENSP00000396673	0	0	0	0	0.855	0	0.54	0.251	0.946
RYBP	YAF2	9606.ENSP00000419494	9606.ENSP00000328004	0	0	0	0.932	0	0.632	0.3	0.943	0.748
RYBP	ZEB1	9606.ENSP00000419494	9606.ENSP00000354487	0	0	0	0	0	0	0	0.45	0.45
RYBP	BCOR	9606.ENSP00000419494	9606.ENSP00000367705	0	0	0	0	0	0.887	0	0.927	0.991
RYBP	JMJD1C	9606.ENSP00000419494	9606.ENSP00000382204	0	0	0	0	0	0	0	0.545	0.545
SAFB	SRSF9	9606.ENSP00000467423	9606.ENSP00000229390	0	0	0	0	0.173	0.32	0	0.505	0.698
SAFB	THOC2	9606.ENSP00000467423	9606.ENSP00000245838	0	0	0	0	0.351	0	0	0.188	0.451
SAFB	ACIN1	9606.ENSP00000467423	9606.ENSP00000262710	0	0	0	0	0.287	0.414	0	0.372	0.715
SAFB	HNRNPD	9606.ENSP00000467423	9606.ENSP00000313199	0	0	0	0	0.126	0.344	0	0.497	0.687
SAFB	SRRM1	9606.ENSP00000467423	9606.ENSP00000326261	0	0	0	0	0.221	0.075	0	0.494	0.604
SAFB	TPR	9606.ENSP00000467423	9606.ENSP00000356448	0	0	0	0	0.337	0	0	0.172	0.429
SAFB	SPEN	9606.ENSP00000467423	9606.ENSP00000364912	0	0	0	0	0.066	0	0	0.407	0.422
SAFB	SF1	9606.ENSP00000467423	9606.ENSP00000366604	0	0	0	0	0.388	0.069	0	0.154	0.476
SAFB	SUMO1	9606.ENSP00000467423	9606.ENSP00000376077	0	0	0	0	0.272	0.109	0.8	0.143	0.873
SAFB	SRSF2	9606.ENSP00000467423	9606.ENSP00000376276	0	0	0	0	0.32	0	0	0.509	0.652
SAFB	ZC3H18	9606.ENSP00000467423	9606.ENSP00000416951	0	0	0	0	0.145	0.489	0	0.094	0.569
SAFB	BCLAF1	9606.ENSP00000467423	9606.ENSP00000435210	0	0	0	0	0.304	0	0	0.174	0.4
SAFB	SRSF5	9606.ENSP00000467423	9606.ENSP00000452123	0	0	0	0	0.163	0.172	0	0.207	0.402
SAFB	SRRT	9606.ENSP00000467423	9606.ENSP00000480421	0	0	0	0	0.636	0	0	0.177	0.687
SAMD14	AKAP13	9606.ENSP00000424474	9606.ENSP00000354718	0	0	0	0	0.062	0.074	0	0.448	0.479
SART1	SNRPC	9606.ENSP00000310448	9606.ENSP00000244520	0	0	0	0	0.088	0.828	0	0.472	0.91
SART1	PATL1	9606.ENSP00000310448	9606.ENSP00000300146	0	0	0	0	0.082	0.271	0	0.199	0.418
SART1	SRRM2	9606.ENSP00000310448	9606.ENSP00000301740	0	0	0	0	0.107	0.411	0.9	0.341	0.96
SART1	SUMO1	9606.ENSP00000310448	9606.ENSP00000376077	0	0	0	0	0.068	0.27	0	0.336	0.509
SART1	SRSF2	9606.ENSP00000310448	9606.ENSP00000376276	0	0	0	0	0.101	0	0	0.478	0.511
SART1	RNF4	9606.ENSP00000310448	9606.ENSP00000426503	0	0	0	0	0.053	0.486	0	0.141	0.545
SART1	WAC	9606.ENSP00000310448	9606.ENSP00000346986	0	0	0	0	0.097	0.533	0	0.101	0.588
SART1	SF1	9606.ENSP00000310448	9606.ENSP00000366604	0	0	0	0	0.129	0.352	0	0.429	0.65
SART1	THRAP3	9606.ENSP00000310448	9606.ENSP00000346634	0	0	0	0	0.061	0.655	0	0	0.662
SASH3	BIN2	9606.ENSP00000349359	9606.ENSP00000267012	0	0	0	0	0.35	0	0	0.22	0.471
SCNM1	SNRPC	9606.ENSP00000357901	9606.ENSP00000244520	0	0	0	0	0.092	0	0	0.575	0.597
SCNM1	SPECC1	9606.ENSP00000357901	9606.ENSP00000261503	0	0	0	0	0	0	0	0.486	0.486
SDE2	CCDC12	9606.ENSP00000272091	9606.ENSP00000292314	0	0	0	0	0	0.582	0	0	0.582
SDE2	CWC25	9606.ENSP00000272091	9606.ENSP00000478070	0	0	0	0	0.077	0.59	0	0.666	0.862
SDE2	SRRM2	9606.ENSP00000272091	9606.ENSP00000301740	0	0	0	0	0.045	0.868	0	0	0.868
SERBP1	MED26	9606.ENSP00000360034	9606.ENSP00000263390	0	0	0	0	0	0	0	0.473	0.473
SERBP1	RPLP2	9606.ENSP00000360034	9606.ENSP00000322419	0	0	0	0	0.201	0.955	0	0	0.962
SERBP1	SRRM1	9606.ENSP00000360034	9606.ENSP00000326261	0	0	0	0	0.361	0	0	0.122	0.415
SERBP1	DDX21	9606.ENSP00000360034	9606.ENSP00000346120	0	0	0	0	0.261	0.164	0	0.137	0.421
SERBP1	DKC1	9606.ENSP00000360034	9606.ENSP00000358563	0	0	0	0	0.238	0.27	0	0	0.42
SERBP1	SMNDC1	9606.ENSP00000360034	9606.ENSP00000358616	0	0	0	0	0.159	0.27	0	0.163	0.441
SERBP1	ZRANB2	9606.ENSP00000360034	9606.ENSP00000359958	0	0	0	0	0.212	0.056	0	0.302	0.436
SERBP1	BTF3	9606.ENSP00000360034	9606.ENSP00000369965	0	0	0	0	0.372	0.213	0	0	0.485
SERBP1	PSIP1	9606.ENSP00000360034	9606.ENSP00000370109	0	0	0	0	0.152	0.27	0	0.427	0.614
SERBP1	YBX1	9606.ENSP00000360034	9606.ENSP00000361626	0	0	0	0	0.284	0.426	0	0.15	0.62
SF1	SRSF9	9606.ENSP00000366604	9606.ENSP00000229390	0	0	0	0	0.119	0.212	0	0.557	0.665
SF1	SNRPC	9606.ENSP00000366604	9606.ENSP00000244520	0	0	0	0	0.303	0.16	0	0.774	0.856
SF1	THOC2	9606.ENSP00000366604	9606.ENSP00000245838	0	0	0	0	0.154	0.27	0	0.163	0.438
SF1	ACIN1	9606.ENSP00000366604	9606.ENSP00000262710	0	0	0	0	0.162	0.27	0	0.101	0.402
SF1	PSME3	9606.ENSP00000366604	9606.ENSP00000293362	0	0	0	0	0.247	0	0	0.557	0.652
SF1	SRRM2	9606.ENSP00000366604	9606.ENSP00000301740	0	0	0	0	0.216	0.27	0	0.343	0.591
SF1	SART1	9606.ENSP00000366604	9606.ENSP00000310448	0	0	0	0	0.129	0.352	0	0.429	0.65
SF1	HNRNPD	9606.ENSP00000366604	9606.ENSP00000313199	0	0	0	0	0.164	0.414	0	0.164	0.555
SF1	SRRM1	9606.ENSP00000366604	9606.ENSP00000326261	0	0	0	0	0.345	0	0	0.454	0.627
SF1	RANBP3	9606.ENSP00000366604	9606.ENSP00000341483	0	0	0	0	0.273	0.244	0	0	0.426
SF1	WAC	9606.ENSP00000366604	9606.ENSP00000346986	0	0	0	0	0.105	0.243	0	0.383	0.545
SF1	HNRNPAB	9606.ENSP00000366604	9606.ENSP00000351108	0	0	0	0	0.155	0.414	0	0.11	0.521
SF1	TPR	9606.ENSP00000366604	9606.ENSP00000356448	0	0	0	0	0.289	0.192	0	0.058	0.411
SF1	CWC25	9606.ENSP00000366604	9606.ENSP00000478070	0	0	0	0	0.064	0.057	0	0.387	0.411
SF1	ZC3H11A	9606.ENSP00000366604	9606.ENSP00000438527	0	0	0	0	0.132	0.271	0	0.181	0.436
SF1	CAST	9606.ENSP00000366604	9606.ENSP00000379157	0	0	0	0	0	0	0	0.439	0.439
SF1	SAFB	9606.ENSP00000366604	9606.ENSP00000467423	0	0	0	0	0.388	0.069	0	0.154	0.476
SF1	EIF4B	9606.ENSP00000366604	9606.ENSP00000388806	0	0	0	0	0.102	0.452	0	0.11	0.524
SF1	ZC3H18	9606.ENSP00000366604	9606.ENSP00000416951	0	0	0	0	0.163	0.486	0	0	0.551
SF1	SRRT	9606.ENSP00000366604	9606.ENSP00000480421	0	0	0	0	0.539	0.27	0	0	0.649
SF1	SRSF2	9606.ENSP00000366604	9606.ENSP00000376276	0	0	0	0	0.475	0.105	0	0.506	0.747
SF1	SRSF5	9606.ENSP00000366604	9606.ENSP00000452123	0	0	0	0	0.316	0.423	0	0.46	0.768
SFSWAP	SRRM1	9606.ENSP00000437738	9606.ENSP00000326261	0	0	0	0	0.127	0.532	0	0	0.574
SFSWAP	ERCC6L	9606.ENSP00000437738	9606.ENSP00000334675	0	0	0	0	0.049	0	0	0.539	0.542
SFSWAP	SON	9606.ENSP00000437738	9606.ENSP00000348984	0	0	0	0	0.067	0	0	0.531	0.545
SFSWAP	ZRANB2	9606.ENSP00000437738	9606.ENSP00000359958	0	0	0	0	0.093	0	0	0.634	0.654
SFSWAP	SRSF2	9606.ENSP00000437738	9606.ENSP00000376276	0	0	0	0	0.094	0	0	0.394	0.428
SFSWAP	GTF2F1	9606.ENSP00000437738	9606.ENSP00000377969	0	0	0	0	0.057	0	0	0.736	0.74
SFSWAP	SRSF5	9606.ENSP00000437738	9606.ENSP00000452123	0	0	0	0	0.064	0	0	0.421	0.435
SKA3	BOD1L1	9606.ENSP00000319417	9606.ENSP00000040738	0	0	0	0	0	0	0.54	0.043	0.54
SKA3	RAD51AP1	9606.ENSP00000319417	9606.ENSP00000228843	0	0	0	0	0.572	0	0	0.135	0.614
SKA3	MCM2	9606.ENSP00000319417	9606.ENSP00000265056	0	0	0	0	0.405	0	0	0	0.405
SKA3	ANLN	9606.ENSP00000319417	9606.ENSP00000265748	0	0	0	0	0.543	0	0	0.217	0.627
SKA3	TICRR	9606.ENSP00000319417	9606.ENSP00000268138	0	0	0	0	0.551	0	0	0.134	0.595
SKA3	CENPC	9606.ENSP00000319417	9606.ENSP00000273853	0	0	0	0	0.122	0	0	0.373	0.426
SKA3	TPX2	9606.ENSP00000319417	9606.ENSP00000300403	0	0	0	0	0.832	0	0	0.18	0.857
SKA3	INCENP	9606.ENSP00000319417	9606.ENSP00000378295	0	0	0	0	0.254	0	0	0.295	0.452
SKA3	ERCC6L	9606.ENSP00000319417	9606.ENSP00000334675	0	0	0	0	0.501	0	0	0.14	0.552
SKA3	CHEK1	9606.ENSP00000319417	9606.ENSP00000388648	0	0	0	0	0.565	0	0	0.06	0.574
SKA3	RRM2	9606.ENSP00000319417	9606.ENSP00000353770	0	0	0	0	0.576	0	0	0	0.576
SKA3	MCM10	9606.ENSP00000319417	9606.ENSP00000418268	0	0	0	0	0.564	0	0	0.086	0.585
SKA3	MKI67	9606.ENSP00000319417	9606.ENSP00000357643	0	0	0	0	0.58	0	0	0.096	0.605
SKA3	NUSAP1	9606.ENSP00000319417	9606.ENSP00000453403	0	0	0	0	0.614	0	0	0.12	0.646
SKA3	CDCA2	9606.ENSP00000319417	9606.ENSP00000328228	0	0	0	0	0.594	0	0	0.422	0.756
SKA3	CDCA3	9606.ENSP00000319417	9606.ENSP00000442068	0	0	0	0	0.745	0	0	0.113	0.764
SKA3	TOP2A	9606.ENSP00000319417	9606.ENSP00000411532	0	0	0	0	0.764	0	0	0.233	0.811
SLBP	SNRPC	9606.ENSP00000417686	9606.ENSP00000244520	0	0	0	0	0.198	0	0	0.462	0.55
SLBP	NASP	9606.ENSP00000417686	9606.ENSP00000255120	0	0	0	0	0.924	0	0	0.828	0.986
SLBP	LIG1	9606.ENSP00000417686	9606.ENSP00000263274	0	0	0	0	0.828	0	0	0	0.828
SLBP	MCM2	9606.ENSP00000417686	9606.ENSP00000265056	0	0	0	0	0.863	0	0	0.347	0.907
SLBP	NUP35	9606.ENSP00000417686	9606.ENSP00000295119	0	0	0	0	0.233	0	0.9	0	0.92
SLBP	PHAX	9606.ENSP00000417686	9606.ENSP00000297540	0	0	0	0	0.146	0	0	0.337	0.409
SLBP	HNRNPD	9606.ENSP00000417686	9606.ENSP00000313199	0	0	0	0	0.159	0	0	0.338	0.42
SLBP	RRM2	9606.ENSP00000417686	9606.ENSP00000353770	0	0	0	0	0.548	0	0	0.293	0.667
SLBP	TPR	9606.ENSP00000417686	9606.ENSP00000356448	0	0	0	0	0.065	0	0.9	0.063	0.904
SLBP	YBX1	9606.ENSP00000417686	9606.ENSP00000361626	0	0	0	0	0.062	0	0.72	0.1	0.742
SLBP	CHEK1	9606.ENSP00000417686	9606.ENSP00000388648	0	0	0	0	0.613	0	0	0.196	0.676
SLBP	SRRT	9606.ENSP00000417686	9606.ENSP00000480421	0	0	0	0	0.112	0	0	0.477	0.516
SLBP	NUSAP1	9606.ENSP00000417686	9606.ENSP00000453403	0	0	0	0	0.553	0	0	0.23	0.641
SLC16A1	RPLP2	9606.ENSP00000441065	9606.ENSP00000322419	0	0	0	0	0.049	0	0	0.441	0.446
SMNDC1	SRSF9	9606.ENSP00000358616	9606.ENSP00000229390	0	0	0	0	0.07	0.698	0	0.204	0.757
SMNDC1	CFDP1	9606.ENSP00000358616	9606.ENSP00000283882	0	0	0	0	0.761	0	0	0	0.761
SMNDC1	HDGFRP2	9606.ENSP00000358616	9606.ENSP00000483345	0	0	0	0	0.113	0	0	0.372	0.419
SMNDC1	SERBP1	9606.ENSP00000358616	9606.ENSP00000360034	0	0	0	0	0.159	0.27	0	0.163	0.441
SMNDC1	ARPP19	9606.ENSP00000358616	9606.ENSP00000455625	0	0	0	0	0.112	0	0	0.672	0.697
SNRPC	SRSF9	9606.ENSP00000244520	9606.ENSP00000229390	0	0	0	0	0.148	0.252	0	0.23	0.466
SNRPC	TCF12	9606.ENSP00000244520	9606.ENSP00000388940	0	0	0	0	0	0	0	0.436	0.436
SNRPC	SRRM2	9606.ENSP00000244520	9606.ENSP00000301740	0	0	0	0	0.11	0.191	0	0.3	0.453
SNRPC	YBX1	9606.ENSP00000244520	9606.ENSP00000361626	0	0	0	0	0.131	0	0	0.4	0.457
SNRPC	SRSF5	9606.ENSP00000244520	9606.ENSP00000452123	0	0	0	0	0.139	0.252	0	0.227	0.459
SNRPC	THOC2	9606.ENSP00000244520	9606.ENSP00000245838	0	0	0	0	0.126	0.389	0	0.072	0.461
SNRPC	CWC25	9606.ENSP00000244520	9606.ENSP00000478070	0	0	0	0	0	0.056	0	0.521	0.529
SNRPC	RRM2	9606.ENSP00000244520	9606.ENSP00000353770	0	0	0	0	0.151	0	0	0.489	0.549
SNRPC	SLBP	9606.ENSP00000244520	9606.ENSP00000417686	0	0	0	0	0.198	0	0	0.462	0.55
SNRPC	WAC	9606.ENSP00000244520	9606.ENSP00000346986	0	0	0	0	0.091	0.424	0	0.258	0.577
SNRPC	SCNM1	9606.ENSP00000244520	9606.ENSP00000357901	0	0	0	0	0.092	0	0	0.575	0.597
SNRPC	HNRNPD	9606.ENSP00000244520	9606.ENSP00000313199	0	0	0	0	0.108	0.696	0	0.175	0.757
SNRPC	SF1	9606.ENSP00000244520	9606.ENSP00000366604	0	0	0	0	0.303	0.16	0	0.774	0.856
SNRPC	SART1	9606.ENSP00000244520	9606.ENSP00000310448	0	0	0	0	0.088	0.828	0	0.472	0.91
SNRPC	SRSF2	9606.ENSP00000244520	9606.ENSP00000376276	0	0	0	0	0.342	0	0.9	0.345	0.953
SON	CENPC	9606.ENSP00000348984	9606.ENSP00000273853	0	0	0	0	0.059	0.182	0	0.411	0.507
SON	PRRC2C	9606.ENSP00000348984	9606.ENSP00000343629	0	0	0	0	0.615	0	0	0	0.615
SON	SRSF2	9606.ENSP00000348984	9606.ENSP00000376276	0	0	0	0	0.206	0	0	0.327	0.443
SON	PSIP1	9606.ENSP00000348984	9606.ENSP00000370109	0	0	0	0	0.062	0.271	0	0.354	0.519
SON	SFSWAP	9606.ENSP00000348984	9606.ENSP00000437738	0	0	0	0	0.067	0	0	0.531	0.545
SOX6	BCL11A	9606.ENSP00000379644	9606.ENSP00000338774	0	0	0	0	0.066	0.101	0	0.917	0.925
SP3	SUMO1	9606.ENSP00000310301	9606.ENSP00000376077	0	0	0	0	0.133	0.296	0.8	0.223	0.892
SPECC1	ANLN	9606.ENSP00000261503	9606.ENSP00000265748	0	0	0	0	0	0.444	0	0.062	0.456
SPECC1	SCNM1	9606.ENSP00000261503	9606.ENSP00000357901	0	0	0	0	0	0	0	0.486	0.486
SPECC1	PDLIM5	9606.ENSP00000261503	9606.ENSP00000480359	0	0	0	0	0.062	0.149	0.54	0.059	0.608
SPEN	CDK13	9606.ENSP00000364912	9606.ENSP00000181839	0	0	0	0	0.065	0.369	0	0.101	0.423
SPEN	THOC2	9606.ENSP00000364912	9606.ENSP00000245838	0	0	0	0	0.062	0.391	0	0.062	0.417
SPEN	ZC3H13	9606.ENSP00000364912	9606.ENSP00000282007	0	0	0	0	0.105	0.391	0	0.091	0.461
SPEN	KMT2D	9606.ENSP00000364912	9606.ENSP00000301067	0	0	0	0	0.654	0.166	0	0.395	0.81
SPEN	ATRX	9606.ENSP00000364912	9606.ENSP00000362441	0	0	0	0	0.068	0	0	0.639	0.65
SPEN	SAFB	9606.ENSP00000364912	9606.ENSP00000467423	0	0	0	0	0.066	0	0	0.407	0.422
SPEN	SRSF2	9606.ENSP00000364912	9606.ENSP00000376276	0	0	0	0	0	0.301	0	0.35	0.526
SPN	YBX3	9606.ENSP00000353238	9606.ENSP00000228251	0	0	0	0	0	0	0	0.537	0.537
SPN	TCF3	9606.ENSP00000353238	9606.ENSP00000262965	0	0	0	0	0	0	0	0.463	0.463
SPN	CXCR4	9606.ENSP00000353238	9606.ENSP00000386884	0	0	0	0	0.091	0	0	0.458	0.487
SPN	YBX1	9606.ENSP00000353238	9606.ENSP00000361626	0	0	0	0	0	0	0	0.539	0.539
SPN	GYPA	9606.ENSP00000353238	9606.ENSP00000354003	0	0	0	0	0.069	0	0	0.566	0.578
SREK1IP1	RRP15	9606.ENSP00000427401	9606.ENSP00000355899	0	0	0	0	0	0	0	0.416	0.416
SRRM1	SRSF9	9606.ENSP00000326261	9606.ENSP00000229390	0	0	0	0	0.083	0.767	0.6	0.551	0.956
SRRM1	THOC2	9606.ENSP00000326261	9606.ENSP00000245838	0	0	0	0	0.119	0	0.6	0.17	0.682
SRRM1	ACIN1	9606.ENSP00000326261	9606.ENSP00000262710	0	0	0	0	0.318	0.39	0	0.447	0.75
SRRM1	CASC3	9606.ENSP00000326261	9606.ENSP00000264645	0	0	0	0	0.064	0	0.6	0.531	0.809
SRRM1	CCDC12	9606.ENSP00000326261	9606.ENSP00000292314	0	0	0	0	0.065	0	0	0.422	0.436
SRRM1	NUP35	9606.ENSP00000326261	9606.ENSP00000295119	0	0	0	0	0.096	0	0.6	0	0.623
SRRM1	SRRM2	9606.ENSP00000326261	9606.ENSP00000301740	0	0	0	0	0.267	0.936	0.8	0.924	0.999
SRRM1	GTF2F1	9606.ENSP00000326261	9606.ENSP00000377969	0	0	0	0	0.204	0.289	0	0	0.41
SRRM1	SERBP1	9606.ENSP00000326261	9606.ENSP00000360034	0	0	0	0	0.361	0	0	0.122	0.415
SRRM1	BCLAF1	9606.ENSP00000326261	9606.ENSP00000435210	0	0	0	0	0.214	0.075	0	0.274	0.427
SRRM1	CWC25	9606.ENSP00000326261	9606.ENSP00000478070	0	0	0	0	0.138	0	0	0.375	0.438
SRRM1	TOP2A	9606.ENSP00000326261	9606.ENSP00000411532	0	0	0	0	0	0	0	0.442	0.442
SRRM1	NOLC1	9606.ENSP00000326261	9606.ENSP00000385410	0	0	0	0	0.072	0.272	0	0.328	0.506
SRRM1	ZC3H18	9606.ENSP00000326261	9606.ENSP00000416951	0	0	0	0	0.211	0.411	0	0.093	0.541
SRRM1	ZRANB2	9606.ENSP00000326261	9606.ENSP00000359958	0	0	0	0	0.128	0	0	0.507	0.552
SRRM1	SFSWAP	9606.ENSP00000326261	9606.ENSP00000437738	0	0	0	0	0.127	0.532	0	0	0.574
SRRM1	SAFB	9606.ENSP00000326261	9606.ENSP00000467423	0	0	0	0	0.221	0.075	0	0.494	0.604
SRRM1	SF1	9606.ENSP00000326261	9606.ENSP00000366604	0	0	0	0	0.345	0	0	0.454	0.627
SRRM1	FIP1L1	9606.ENSP00000326261	9606.ENSP00000336752	0	0	0	0	0.118	0	0.6	0	0.632
SRRM1	ZC3H11A	9606.ENSP00000326261	9606.ENSP00000438527	0	0	0	0	0.174	0	0.6	0	0.655
SRRM1	THRAP3	9606.ENSP00000326261	9606.ENSP00000346634	0	0	0	0	0.291	0.27	0	0.422	0.674
SRRM1	TPR	9606.ENSP00000326261	9606.ENSP00000356448	0	0	0	0	0.201	0	0.6	0.113	0.691
SRRM1	SRSF5	9606.ENSP00000326261	9606.ENSP00000452123	0	0	0	0	0.149	0.438	0.6	0.664	0.927
SRRM1	SRSF2	9606.ENSP00000326261	9606.ENSP00000376276	0	0	0	0	0.383	0.794	0.6	0.628	0.978
SRRM2	SRSF9	9606.ENSP00000301740	9606.ENSP00000229390	0	0	0	0	0.066	0.184	0	0.483	0.572
SRRM2	SNRPC	9606.ENSP00000301740	9606.ENSP00000244520	0	0	0	0	0.11	0.191	0	0.3	0.453
SRRM2	PPIG	9606.ENSP00000301740	9606.ENSP00000260970	0	0	0	0	0.126	0.826	0	0.099	0.851
SRRM2	ACIN1	9606.ENSP00000301740	9606.ENSP00000262710	0	0	0	0	0.775	0.681	0	0.432	0.955
SRRM2	CASC3	9606.ENSP00000301740	9606.ENSP00000264645	0	0	0	0	0.065	0.8	0	0.367	0.871
SRRM2	SDE2	9606.ENSP00000301740	9606.ENSP00000272091	0	0	0	0	0.045	0.868	0	0	0.868
SRRM2	KMT2D	9606.ENSP00000301740	9606.ENSP00000301067	0	0	0	0	0.836	0	0	0.061	0.839
SRRM2	MYB	9606.ENSP00000301740	9606.ENSP00000339992	0	0	0	0	0.064	0.345	0	0.115	0.41
SRRM2	THRAP3	9606.ENSP00000301740	9606.ENSP00000346634	0	0	0	0	0.128	0	0	0.436	0.488
SRRM2	AKAP12	9606.ENSP00000301740	9606.ENSP00000384537	0	0	0	0	0	0	0	0.508	0.508
SRRM2	SRSF2	9606.ENSP00000301740	9606.ENSP00000376276	0	0	0	0	0.184	0	0	0.463	0.543
SRRM2	SF1	9606.ENSP00000301740	9606.ENSP00000366604	0	0	0	0	0.216	0.27	0	0.343	0.591
SRRM2	ZRANB2	9606.ENSP00000301740	9606.ENSP00000359958	0	0	0	0	0.073	0	0	0.596	0.609
SRRM2	SRSF5	9606.ENSP00000301740	9606.ENSP00000452123	0	0	0	0	0.132	0.56	0	0.607	0.836
SRRM2	ZC3H18	9606.ENSP00000301740	9606.ENSP00000416951	0	0	0	0	0.118	0.823	0	0	0.837
SRRM2	SART1	9606.ENSP00000301740	9606.ENSP00000310448	0	0	0	0	0.107	0.411	0.9	0.341	0.96
SRRM2	CWC25	9606.ENSP00000301740	9606.ENSP00000478070	0	0	0	0	0.084	0.868	0	0.734	0.965
SRRM2	SRRM1	9606.ENSP00000301740	9606.ENSP00000326261	0	0	0	0	0.267	0.936	0.8	0.924	0.999
SRRT	THOC2	9606.ENSP00000480421	9606.ENSP00000245838	0	0	0	0	0.308	0	0	0.539	0.667
SRRT	ACIN1	9606.ENSP00000480421	9606.ENSP00000262710	0	0	0	0	0.26	0	0	0.234	0.41
SRRT	PSME3	9606.ENSP00000480421	9606.ENSP00000293362	0	0	0	0	0.304	0.272	0	0.047	0.474
SRRT	PHAX	9606.ENSP00000480421	9606.ENSP00000297540	0	0	0	0	0.132	0	0.8	0.977	0.995
SRRT	SF1	9606.ENSP00000480421	9606.ENSP00000366604	0	0	0	0	0.539	0.27	0	0	0.649
SRRT	C17orf85	9606.ENSP00000480421	9606.ENSP00000373657	0	0	0	0	0.142	0.477	0	0.727	0.867
SRRT	SUMO1	9606.ENSP00000480421	9606.ENSP00000376077	0	0	0	0	0.318	0.181	0	0.061	0.429
SRRT	SRSF2	9606.ENSP00000480421	9606.ENSP00000376276	0	0	0	0	0.404	0	0	0.164	0.48
SRRT	ZC3H18	9606.ENSP00000480421	9606.ENSP00000416951	0	0	0	0	0.194	0.678	0	0.336	0.812
SRRT	SLBP	9606.ENSP00000480421	9606.ENSP00000417686	0	0	0	0	0.112	0	0	0.477	0.516
SRRT	SAFB	9606.ENSP00000480421	9606.ENSP00000467423	0	0	0	0	0.636	0	0	0.177	0.687
SRSF2	SRSF9	9606.ENSP00000376276	9606.ENSP00000229390	0	0	0	0	0.272	0.884	0.8	0.789	0.996
SRSF2	SNRPC	9606.ENSP00000376276	9606.ENSP00000244520	0	0	0	0	0.342	0	0.9	0.345	0.953
SRSF2	THOC2	9606.ENSP00000376276	9606.ENSP00000245838	0	0	0	0	0.099	0	0.6	0.292	0.722
SRSF2	PPIG	9606.ENSP00000376276	9606.ENSP00000260970	0	0	0	0	0.157	0.078	0	0.309	0.416
SRSF2	CASC3	9606.ENSP00000376276	9606.ENSP00000264645	0	0	0	0	0.063	0	0.6	0.329	0.726
SRSF2	SRRM2	9606.ENSP00000376276	9606.ENSP00000301740	0	0	0	0	0.184	0	0	0.463	0.543
SRSF2	SART1	9606.ENSP00000376276	9606.ENSP00000310448	0	0	0	0	0.101	0	0	0.478	0.511
SRSF2	HNRNPD	9606.ENSP00000376276	9606.ENSP00000313199	0	0	0	0	0.3	0.168	0	0.431	0.64
SRSF2	SRRM1	9606.ENSP00000376276	9606.ENSP00000326261	0	0	0	0	0.383	0.794	0.6	0.628	0.978
SRSF2	HEXIM1	9606.ENSP00000376276	9606.ENSP00000328773	0	0	0	0	0.123	0.343	0	0.516	0.697
SRSF2	FIP1L1	9606.ENSP00000376276	9606.ENSP00000336752	0	0	0	0	0.092	0	0.6	0.273	0.713
SRSF2	PTMA	9606.ENSP00000376276	9606.ENSP00000344547	0	0	0	0	0.212	0.618	0	0	0.686
SRSF2	DDX21	9606.ENSP00000376276	9606.ENSP00000346120	0	0	0	0	0.312	0	0	0.609	0.719
SRSF2	THRAP3	9606.ENSP00000376276	9606.ENSP00000346634	0	0	0	0	0.266	0	0	0.233	0.413
SRSF2	SON	9606.ENSP00000376276	9606.ENSP00000348984	0	0	0	0	0.206	0	0	0.327	0.443
SRSF2	HNRNPAB	9606.ENSP00000376276	9606.ENSP00000351108	0	0	0.291	0	0.285	0.168	0	0.228	0.631
SRSF2	RRM2	9606.ENSP00000376276	9606.ENSP00000353770	0	0	0	0	0.142	0.173	0	0.268	0.435
SRSF2	ZRANB2	9606.ENSP00000376276	9606.ENSP00000359958	0	0	0	0	0.149	0.243	0	0.225	0.458
SRSF2	YBX1	9606.ENSP00000376276	9606.ENSP00000361626	0	0	0	0	0.108	0	0.8	0.358	0.875
SRSF2	SPEN	9606.ENSP00000376276	9606.ENSP00000364912	0	0	0	0	0	0.301	0	0.35	0.526
SRSF2	SF1	9606.ENSP00000376276	9606.ENSP00000366604	0	0	0	0	0.475	0.105	0	0.506	0.747
SRSF2	BCOR	9606.ENSP00000376276	9606.ENSP00000367705	0	0	0	0	0	0	0	0.664	0.664
SRSF2	SFSWAP	9606.ENSP00000376276	9606.ENSP00000437738	0	0	0	0	0.094	0	0	0.394	0.428
SRSF2	BCLAF1	9606.ENSP00000376276	9606.ENSP00000435210	0	0	0	0	0.335	0	0	0.214	0.455
SRSF2	SRRT	9606.ENSP00000376276	9606.ENSP00000480421	0	0	0	0	0.404	0	0	0.164	0.48
SRSF2	ZC3H18	9606.ENSP00000376276	9606.ENSP00000416951	0	0	0	0	0.305	0.27	0	0.107	0.507
SRSF2	TOP2A	9606.ENSP00000376276	9606.ENSP00000411532	0	0	0	0	0.099	0.499	0	0	0.529
SRSF2	TOP2B	9606.ENSP00000376276	9606.ENSP00000396704	0	0	0	0	0.126	0.499	0	0	0.543
SRSF2	SAFB	9606.ENSP00000376276	9606.ENSP00000467423	0	0	0	0	0.32	0	0	0.509	0.652
SRSF2	ZC3H11A	9606.ENSP00000376276	9606.ENSP00000438527	0	0	0	0	0.153	0	0.6	0.201	0.705
SRSF2	GTF2F1	9606.ENSP00000376276	9606.ENSP00000377969	0	0	0	0	0.304	0	0.6	0.082	0.722
SRSF2	SRSF5	9606.ENSP00000376276	9606.ENSP00000452123	0	0	0	0.754	0.289	0.255	0.8	0.884	0.909
SRSF5	SRSF9	9606.ENSP00000452123	9606.ENSP00000229390	0	0	0	0.816	0.09	0.078	0.8	0.827	0.845
SRSF5	SNRPC	9606.ENSP00000452123	9606.ENSP00000244520	0	0	0	0	0.139	0.252	0	0.227	0.459
SRSF5	THOC2	9606.ENSP00000452123	9606.ENSP00000245838	0	0	0	0	0.094	0.103	0.6	0.249	0.723
SRSF5	CASC3	9606.ENSP00000452123	9606.ENSP00000264645	0	0	0	0	0.062	0.185	0.6	0.101	0.688
SRSF5	SRRM2	9606.ENSP00000452123	9606.ENSP00000301740	0	0	0	0	0.132	0.56	0	0.607	0.836
SRSF5	HNRNPD	9606.ENSP00000452123	9606.ENSP00000313199	0	0	0	0	0.143	0.213	0	0.39	0.553
SRSF5	SRRM1	9606.ENSP00000452123	9606.ENSP00000326261	0	0	0	0	0.149	0.438	0.6	0.664	0.927
SRSF5	FIP1L1	9606.ENSP00000452123	9606.ENSP00000336752	0	0	0	0	0.096	0.338	0.6	0.152	0.769
SRSF5	WAC	9606.ENSP00000452123	9606.ENSP00000346986	0	0	0	0	0.092	0.24	0	0.226	0.419
SRSF5	YBX1	9606.ENSP00000452123	9606.ENSP00000361626	0.051	0	0	0	0.11	0.057	0	0.374	0.435
SRSF5	SF1	9606.ENSP00000452123	9606.ENSP00000366604	0	0	0	0	0.316	0.423	0	0.46	0.768
SRSF5	SRSF2	9606.ENSP00000452123	9606.ENSP00000376276	0	0	0	0.754	0.289	0.255	0.8	0.884	0.909
SRSF5	ARGLU1	9606.ENSP00000452123	9606.ENSP00000383059	0	0	0	0	0.249	0.064	0	0.228	0.411
SRSF5	NOLC1	9606.ENSP00000452123	9606.ENSP00000385410	0	0	0	0	0.078	0	0	0.449	0.47
SRSF5	EIF4B	9606.ENSP00000452123	9606.ENSP00000388806	0	0	0	0	0.226	0.213	0	0.111	0.411
SRSF5	SFSWAP	9606.ENSP00000452123	9606.ENSP00000437738	0	0	0	0	0.064	0	0	0.421	0.435
SRSF5	ZC3H11A	9606.ENSP00000452123	9606.ENSP00000438527	0	0	0	0	0.088	0	0.6	0.045	0.621
SRSF5	SAFB	9606.ENSP00000452123	9606.ENSP00000467423	0	0	0	0	0.163	0.172	0	0.207	0.402
SRSF9	EEF1B2	9606.ENSP00000229390	9606.ENSP00000376056	0	0	0	0	0.148	0.271	0	0.113	0.401
SRSF9	GTF2F1	9606.ENSP00000229390	9606.ENSP00000377969	0	0	0	0	0.066	0.386	0	0	0.402
SRSF9	TOP2A	9606.ENSP00000229390	9606.ENSP00000411532	0	0	0	0	0.087	0.39	0	0.059	0.43
SRSF9	TOP2B	9606.ENSP00000229390	9606.ENSP00000396704	0	0	0	0	0.103	0.39	0	0.059	0.44
SRSF9	BCLAF1	9606.ENSP00000229390	9606.ENSP00000435210	0	0	0	0	0.136	0.198	0	0.29	0.465
SRSF9	SNRPC	9606.ENSP00000229390	9606.ENSP00000244520	0	0	0	0	0.148	0.252	0	0.23	0.466
SRSF9	BIN1	9606.ENSP00000229390	9606.ENSP00000316779	0	0	0	0	0	0.086	0	0.445	0.471
SRSF9	HNRNPD	9606.ENSP00000229390	9606.ENSP00000313199	0	0	0	0	0.136	0.182	0	0.328	0.484
SRSF9	SRRM2	9606.ENSP00000229390	9606.ENSP00000301740	0	0	0	0	0.066	0.184	0	0.483	0.572
SRSF9	HNRNPAB	9606.ENSP00000229390	9606.ENSP00000351108	0	0	0	0	0.322	0.182	0	0.31	0.584
SRSF9	RRM2	9606.ENSP00000229390	9606.ENSP00000353770	0	0	0	0	0.114	0.139	0	0.535	0.615
SRSF9	ZC3H11A	9606.ENSP00000229390	9606.ENSP00000438527	0	0	0	0	0.081	0	0.6	0.052	0.621
SRSF9	SF1	9606.ENSP00000229390	9606.ENSP00000366604	0	0	0	0	0.119	0.212	0	0.557	0.665
SRSF9	SAFB	9606.ENSP00000229390	9606.ENSP00000467423	0	0	0	0	0.173	0.32	0	0.505	0.698
SRSF9	THOC2	9606.ENSP00000229390	9606.ENSP00000245838	0	0	0	0	0.165	0.063	0.6	0.172	0.706
SRSF9	SMNDC1	9606.ENSP00000229390	9606.ENSP00000358616	0	0	0	0	0.07	0.698	0	0.204	0.757
SRSF9	YBX1	9606.ENSP00000229390	9606.ENSP00000361626	0.051	0	0	0	0.102	0.473	0	0.555	0.774
SRSF9	FIP1L1	9606.ENSP00000229390	9606.ENSP00000336752	0	0	0	0	0.145	0.338	0.6	0.135	0.777
SRSF9	SRSF5	9606.ENSP00000229390	9606.ENSP00000452123	0	0	0	0.816	0.09	0.078	0.8	0.827	0.845
SRSF9	CASC3	9606.ENSP00000229390	9606.ENSP00000264645	0	0	0	0	0.056	0.7	0.6	0.368	0.918
SRSF9	SRRM1	9606.ENSP00000229390	9606.ENSP00000326261	0	0	0	0	0.083	0.767	0.6	0.551	0.956
SRSF9	SRSF2	9606.ENSP00000229390	9606.ENSP00000376276	0	0	0	0	0.272	0.884	0.8	0.789	0.996
STMN1	HN1L	9606.ENSP00000410452	9606.ENSP00000248098	0	0	0	0	0.043	0.68	0	0	0.68
STMN1	ANLN	9606.ENSP00000410452	9606.ENSP00000265748	0	0	0	0	0.186	0	0	0.413	0.502
STMN1	TPX2	9606.ENSP00000410452	9606.ENSP00000300403	0	0	0	0	0.252	0	0	0.3	0.455
STMN1	HN1	9606.ENSP00000410452	9606.ENSP00000348316	0	0	0	0	0.122	0.621	0	0	0.653
STMN1	MAP2	9606.ENSP00000410452	9606.ENSP00000353508	0	0	0	0	0.062	0.057	0	0.414	0.436
STMN1	RRM2	9606.ENSP00000410452	9606.ENSP00000353770	0	0	0	0	0.284	0	0	0.23	0.426
STMN1	INCENP	9606.ENSP00000410452	9606.ENSP00000378295	0	0	0	0	0.096	0	0	0.497	0.526
STMN1	NUSAP1	9606.ENSP00000410452	9606.ENSP00000453403	0	0	0	0	0.298	0	0	0.333	0.511
STMN1	TOP2A	9606.ENSP00000410452	9606.ENSP00000411532	0	0	0	0	0.31	0	0	0.4	0.569
SUMO1	RIF1	9606.ENSP00000376077	9606.ENSP00000243326	0	0	0	0	0.062	0	0.6	0	0.608
SUMO1	ACIN1	9606.ENSP00000376077	9606.ENSP00000262710	0	0	0	0	0.146	0	0	0.379	0.447
SUMO1	PSME3	9606.ENSP00000376077	9606.ENSP00000293362	0	0	0	0	0.288	0	0	0.217	0.418
SUMO1	NUP35	9606.ENSP00000376077	9606.ENSP00000295119	0	0	0	0	0.132	0	0.6	0.058	0.644
SUMO1	SP3	9606.ENSP00000376077	9606.ENSP00000310301	0	0	0	0	0.133	0.296	0.8	0.223	0.892
SUMO1	SART1	9606.ENSP00000376077	9606.ENSP00000310448	0	0	0	0	0.068	0.27	0	0.336	0.509
SUMO1	RNF168	9606.ENSP00000376077	9606.ENSP00000320898	0	0	0	0	0	0.27	0.8	0.416	0.907
SUMO1	RPLP2	9606.ENSP00000376077	9606.ENSP00000322419	0	0	0	0	0.278	0.161	0	0.163	0.449
SUMO1	BCL11A	9606.ENSP00000376077	9606.ENSP00000338774	0	0	0	0	0	0.143	0	0.408	0.471
SUMO1	MYB	9606.ENSP00000376077	9606.ENSP00000339992	0	0	0	0	0.051	0.27	0	0.314	0.483
SUMO1	ZEB1	9606.ENSP00000376077	9606.ENSP00000354487	0	0	0	0	0	0.105	0.9	0.119	0.914
SUMO1	TPR	9606.ENSP00000376077	9606.ENSP00000356448	0	0	0	0	0.183	0.077	0.6	0.264	0.748
SUMO1	ATRX	9606.ENSP00000376077	9606.ENSP00000362441	0	0	0	0	0.062	0.212	0	0.314	0.448
SUMO1	MDC1	9606.ENSP00000376077	9606.ENSP00000365588	0	0	0	0	0.065	0.222	0.8	0.407	0.902
SUMO1	PSIP1	9606.ENSP00000376077	9606.ENSP00000370109	0	0	0	0	0.065	0.27	0	0.232	0.431
SUMO1	CHEK1	9606.ENSP00000376077	9606.ENSP00000388648	0	0	0	0	0	0.212	0	0.301	0.425
SUMO1	SRRT	9606.ENSP00000376077	9606.ENSP00000480421	0	0	0	0	0.318	0.181	0	0.061	0.429
SUMO1	ATF7IP	9606.ENSP00000376077	9606.ENSP00000440440	0	0	0	0	0	0.135	0	0.415	0.472
SUMO1	RAD23A	9606.ENSP00000376077	9606.ENSP00000467024	0	0	0	0	0.097	0.076	0.6	0.346	0.752
SUMO1	SAFB	9606.ENSP00000376077	9606.ENSP00000467423	0	0	0	0	0.272	0.109	0.8	0.143	0.873
SUMO1	MBD1	9606.ENSP00000376077	9606.ENSP00000468785	0	0	0	0	0	0.27	0.8	0.396	0.904
SUMO1	TOP2B	9606.ENSP00000376077	9606.ENSP00000396704	0	0	0	0	0.068	0.366	0.8	0.346	0.912
SUMO1	INCENP	9606.ENSP00000376077	9606.ENSP00000378295	0	0	0	0	0.067	0	0.9	0.162	0.915
SUMO1	TOP2A	9606.ENSP00000376077	9606.ENSP00000411532	0	0	0	0	0.064	0.382	0.8	0.416	0.923
SUMO1	BRCA1	9606.ENSP00000376077	9606.ENSP00000418960	0	0	0	0	0.062	0.661	0.8	0.547	0.967
SUMO1	RNF4	9606.ENSP00000376077	9606.ENSP00000426503	0	0	0	0	0	0.9	0.9	0.824	0.998
SYNJ1	BIN2	9606.ENSP00000409667	9606.ENSP00000267012	0	0	0	0	0.053	0.104	0.9	0.146	0.917
SYNJ1	BIN1	9606.ENSP00000409667	9606.ENSP00000316779	0	0	0	0	0.053	0.325	0.9	0.548	0.967
SYNJ1	EPS15	9606.ENSP00000409667	9606.ENSP00000360798	0	0	0	0	0.065	0.378	0.9	0.755	0.983
SYNJ1	ATXN2	9606.ENSP00000409667	9606.ENSP00000366843	0	0	0	0	0.063	0	0	0.486	0.498
TAF7	MED26	9606.ENSP00000312709	9606.ENSP00000263390	0	0	0	0	0.065	0.27	0	0.7	0.777
TAF7	C17orf49	9606.ENSP00000312709	9606.ENSP00000448598	0	0	0	0	0	0	0.9	0	0.9
TAF7	TCEA1	9606.ENSP00000312709	9606.ENSP00000428426	0	0	0	0	0.11	0	0.9	0.125	0.915
TAF7	GTF2F1	9606.ENSP00000312709	9606.ENSP00000377969	0	0	0	0	0.156	0	0.9	0.712	0.973
TAL1	TCF3	9606.ENSP00000294339	9606.ENSP00000262965	0	0	0	0	0.062	0.897	0.6	0.988	0.999
TAL1	GYPA	9606.ENSP00000294339	9606.ENSP00000354003	0	0	0	0	0.108	0	0	0.457	0.495
TAL1	BCL11A	9606.ENSP00000294339	9606.ENSP00000338774	0	0	0	0	0.063	0.066	0	0.591	0.611
TAL1	MYB	9606.ENSP00000294339	9606.ENSP00000339992	0	0	0	0	0.062	0.27	0.8	0.75	0.961
TAL1	TCF12	9606.ENSP00000294339	9606.ENSP00000388940	0	0	0	0	0.062	0.883	0.6	0.791	0.989
TCEA1	MED26	9606.ENSP00000428426	9606.ENSP00000263390	0	0	0	0.59	0	0.27	0	0.524	0.42
TCEA1	MCM2	9606.ENSP00000428426	9606.ENSP00000265056	0	0	0	0	0.089	0.27	0	0.225	0.439
TCEA1	TAF7	9606.ENSP00000428426	9606.ENSP00000312709	0	0	0	0	0.11	0	0.9	0.125	0.915
TCEA1	RERE	9606.ENSP00000428426	9606.ENSP00000338629	0	0	0	0	0	0	0	0.413	0.412
TCEA1	BDP1	9606.ENSP00000428426	9606.ENSP00000351575	0	0	0	0	0.062	0.212	0	0.37	0.493
TCEA1	ZNF830	9606.ENSP00000428426	9606.ENSP00000354518	0	0	0	0	0.062	0	0.6	0	0.608
TCEA1	GTF2F1	9606.ENSP00000428426	9606.ENSP00000377969	0	0	0	0	0.062	0.925	0.9	0.51	0.996
TCEA1	EAF1	9606.ENSP00000428426	9606.ENSP00000380054	0	0	0	0	0.062	0.113	0.8	0.226	0.854
TCF12	SNRPC	9606.ENSP00000388940	9606.ENSP00000244520	0	0	0	0	0	0	0	0.436	0.436
TCF12	ATF1	9606.ENSP00000388940	9606.ENSP00000262053	0	0	0	0	0	0	0.6	0.102	0.625
TCF12	TCF3	9606.ENSP00000388940	9606.ENSP00000262965	0	0	0	0.929	0.062	0.478	0.3	0.954	0.652
TCF12	TAL1	9606.ENSP00000388940	9606.ENSP00000294339	0	0	0	0	0.062	0.883	0.6	0.791	0.989
TCF12	HEXIM2	9606.ENSP00000388940	9606.ENSP00000302276	0	0	0	0	0	0.654	0	0	0.654
TCF12	BCL11A	9606.ENSP00000388940	9606.ENSP00000338774	0	0	0	0	0.062	0.058	0	0.462	0.484
TCF12	MYB	9606.ENSP00000388940	9606.ENSP00000339992	0	0	0	0	0.064	0	0.6	0.31	0.719
TCF12	WAC	9606.ENSP00000388940	9606.ENSP00000346986	0	0	0	0	0.127	0	0	0.44	0.49
TCF12	ZEB1	9606.ENSP00000388940	9606.ENSP00000354487	0	0	0	0	0.064	0.388	0	0.507	0.692
TCF12	ZEB2	9606.ENSP00000388940	9606.ENSP00000454157	0	0	0	0	0.063	0.233	0	0.343	0.486
TCF20	RAI1	9606.ENSP00000352463	9606.ENSP00000323074	0	0	0	0.576	0.087	0.647	0	0.598	0.746
TCF20	ATRX	9606.ENSP00000352463	9606.ENSP00000362441	0	0	0	0	0.153	0.153	0	0.258	0.421
TCF20	MDC1	9606.ENSP00000352463	9606.ENSP00000365588	0	0	0	0	0.085	0.468	0	0.44	0.704
TCF20	RNF4	9606.ENSP00000352463	9606.ENSP00000426503	0	0	0	0	0.062	0.486	0	0.716	0.851
TCF3	SPN	9606.ENSP00000262965	9606.ENSP00000353238	0	0	0	0	0	0	0	0.463	0.463
TCF3	BCL11A	9606.ENSP00000262965	9606.ENSP00000338774	0	0	0	0	0	0.058	0	0.464	0.473
TCF3	ZEB2	9606.ENSP00000262965	9606.ENSP00000454157	0	0	0	0	0.062	0.212	0	0.362	0.487
TCF3	FOXO3	9606.ENSP00000262965	9606.ENSP00000385824	0	0	0	0	0.049	0.146	0	0.445	0.511
TCF3	ZEB1	9606.ENSP00000262965	9606.ENSP00000354487	0	0	0	0	0.062	0.212	0	0.411	0.527
TCF3	TCF12	9606.ENSP00000262965	9606.ENSP00000388940	0	0	0	0.929	0.062	0.478	0.3	0.954	0.652
TCF3	MYB	9606.ENSP00000262965	9606.ENSP00000339992	0	0	0	0	0.085	0	0.6	0.422	0.77
TCF3	TAL1	9606.ENSP00000262965	9606.ENSP00000294339	0	0	0	0	0.062	0.897	0.6	0.988	0.999
TCOF1	CCDC86	9606.ENSP00000367028	9606.ENSP00000227520	0	0	0	0	0.131	0	0	0.622	0.658
TCOF1	DKC1	9606.ENSP00000367028	9606.ENSP00000358563	0	0	0	0	0.135	0.27	0	0.453	0.624
TCOF1	PRRC2A	9606.ENSP00000367028	9606.ENSP00000365201	0	0	0	0	0.102	0	0	0.385	0.424
TCOF1	ZC3H18	9606.ENSP00000367028	9606.ENSP00000416951	0	0	0	0	0.376	0.27	0	0	0.525
TCOF1	NOLC1	9606.ENSP00000367028	9606.ENSP00000385410	0	0	0	0.552	0.126	0.633	0	0.905	0.8
THOC2	CDK13	9606.ENSP00000245838	9606.ENSP00000181839	0	0	0	0	0.123	0.346	0	0.14	0.463
THOC2	SRSF9	9606.ENSP00000245838	9606.ENSP00000229390	0	0	0	0	0.165	0.063	0.6	0.172	0.706
THOC2	SNRPC	9606.ENSP00000245838	9606.ENSP00000244520	0	0	0	0	0.126	0.389	0	0.072	0.461
THOC2	SPEN	9606.ENSP00000245838	9606.ENSP00000364912	0	0	0	0	0.062	0.391	0	0.062	0.417
THOC2	SF1	9606.ENSP00000245838	9606.ENSP00000366604	0	0	0	0	0.154	0.27	0	0.163	0.438
THOC2	SAFB	9606.ENSP00000245838	9606.ENSP00000467423	0	0	0	0	0.351	0	0	0.188	0.451
THOC2	PPIG	9606.ENSP00000245838	9606.ENSP00000260970	0	0	0	0	0.525	0.151	0	0	0.579
THOC2	ZC3H18	9606.ENSP00000245838	9606.ENSP00000416951	0	0	0	0	0.098	0.27	0	0.451	0.607
THOC2	CASC3	9606.ENSP00000245838	9606.ENSP00000264645	0	0	0	0	0.062	0	0.6	0.064	0.618
THOC2	BCLAF1	9606.ENSP00000245838	9606.ENSP00000435210	0	0	0	0	0.307	0.479	0	0	0.623
THOC2	AMMECR1	9606.ENSP00000245838	9606.ENSP00000262844	0	0	0	0	0.558	0	0	0.228	0.644
THOC2	SRRT	9606.ENSP00000245838	9606.ENSP00000480421	0	0	0	0	0.308	0	0	0.539	0.667
THOC2	SRRM1	9606.ENSP00000245838	9606.ENSP00000326261	0	0	0	0	0.119	0	0.6	0.17	0.682
THOC2	SRSF2	9606.ENSP00000245838	9606.ENSP00000376276	0	0	0	0	0.099	0	0.6	0.292	0.722
THOC2	SRSF5	9606.ENSP00000245838	9606.ENSP00000452123	0	0	0	0	0.094	0.103	0.6	0.249	0.723
THOC2	FIP1L1	9606.ENSP00000245838	9606.ENSP00000336752	0	0	0	0	0.201	0.115	0.6	0.153	0.728
THOC2	ATRX	9606.ENSP00000245838	9606.ENSP00000362441	0	0	0	0	0.683	0.077	0	0.186	0.741
THOC2	TPR	9606.ENSP00000245838	9606.ENSP00000356448	0	0	0	0	0.546	0	0	0.486	0.756
THOC2	ZC3H11A	9606.ENSP00000245838	9606.ENSP00000438527	0	0	0	0	0.187	0.387	0.6	0.293	0.84
THOC2	C17orf85	9606.ENSP00000245838	9606.ENSP00000373657	0	0	0	0	0.145	0.673	0	0.54	0.86
THRAP3	ACIN1	9606.ENSP00000346634	9606.ENSP00000262710	0	0	0	0	0.105	0.129	0	0.348	0.447
THRAP3	MED26	9606.ENSP00000346634	9606.ENSP00000263390	0	0	0	0	0	0	0.9	0.066	0.902
THRAP3	CASC3	9606.ENSP00000346634	9606.ENSP00000264645	0	0	0	0	0.065	0.27	0	0.301	0.481
THRAP3	ZC3H13	9606.ENSP00000346634	9606.ENSP00000282007	0	0	0	0	0.143	0	0	0.395	0.459
THRAP3	SRRM2	9606.ENSP00000346634	9606.ENSP00000301740	0	0	0	0	0.128	0	0	0.436	0.488
THRAP3	SART1	9606.ENSP00000346634	9606.ENSP00000310448	0	0	0	0	0.061	0.655	0	0	0.662
THRAP3	SRRM1	9606.ENSP00000346634	9606.ENSP00000326261	0	0	0	0	0.291	0.27	0	0.422	0.674
THRAP3	MED19	9606.ENSP00000346634	9606.ENSP00000337340	0	0	0	0	0	0	0.6	0.217	0.673
THRAP3	ZRANB2	9606.ENSP00000346634	9606.ENSP00000359958	0	0	0	0	0.09	0	0	0.377	0.409
THRAP3	SRSF2	9606.ENSP00000346634	9606.ENSP00000376276	0	0	0	0	0.266	0	0	0.233	0.413
THRAP3	BRCA1	9606.ENSP00000346634	9606.ENSP00000418960	0	0	0	0	0.062	0	0	0.477	0.488
THRAP3	ZC3H18	9606.ENSP00000346634	9606.ENSP00000416951	0	0	0	0	0.099	0.27	0	0.391	0.564
THRAP3	BCLAF1	9606.ENSP00000346634	9606.ENSP00000435210	0	0	0	0.806	0.228	0.843	0.54	0.959	0.95
TICRR	MCM2	9606.ENSP00000268138	9606.ENSP00000265056	0	0	0	0	0.342	0	0	0.937	0.958
TICRR	ANLN	9606.ENSP00000268138	9606.ENSP00000265748	0	0	0	0	0.329	0	0	0.241	0.468
TICRR	INCENP	9606.ENSP00000268138	9606.ENSP00000378295	0	0	0	0	0.212	0	0	0.293	0.419
TICRR	SKA3	9606.ENSP00000268138	9606.ENSP00000319417	0	0	0	0	0.551	0	0	0.134	0.595
TICRR	RRM2	9606.ENSP00000268138	9606.ENSP00000353770	0	0	0	0	0.558	0	0	0.141	0.604
TICRR	CDCA2	9606.ENSP00000268138	9606.ENSP00000328228	0	0	0	0	0.554	0	0	0.159	0.609
TICRR	NUSAP1	9606.ENSP00000268138	9606.ENSP00000453403	0	0	0	0	0.56	0	0	0.168	0.619
TICRR	CLSPN	9606.ENSP00000268138	9606.ENSP00000312995	0	0	0	0	0.279	0	0	0.506	0.628
TICRR	TPX2	9606.ENSP00000268138	9606.ENSP00000300403	0	0	0	0	0.565	0	0	0.185	0.63
TICRR	TOP2A	9606.ENSP00000268138	9606.ENSP00000411532	0	0	0	0	0.579	0	0	0.192	0.645
TICRR	MKI67	9606.ENSP00000268138	9606.ENSP00000357643	0	0	0	0	0.734	0.27	0	0.089	0.808
TICRR	CHEK1	9606.ENSP00000268138	9606.ENSP00000388648	0	0	0	0	0.394	0	0	0.847	0.903
TICRR	MCM10	9606.ENSP00000268138	9606.ENSP00000418268	0	0	0	0	0.565	0	0	0.853	0.933
TMF1	MED19	9606.ENSP00000381567	9606.ENSP00000337340	0	0	0	0	0	0	0	0.402	0.402
TMPO	RAD51AP1	9606.ENSP00000266732	9606.ENSP00000228843	0	0	0	0	0.432	0	0	0.06	0.444
TMPO	ANLN	9606.ENSP00000266732	9606.ENSP00000265748	0	0	0	0	0.349	0.27	0	0.208	0.591
TMPO	CHEK1	9606.ENSP00000266732	9606.ENSP00000388648	0	0	0	0	0.402	0	0	0.043	0.403
TMPO	RRBP1	9606.ENSP00000266732	9606.ENSP00000367038	0	0	0	0	0	0.471	0	0	0.471
TMPO	HIRIP3	9606.ENSP00000266732	9606.ENSP00000279392	0	0	0	0	0.064	0.246	0	0.321	0.479
TMPO	TPX2	9606.ENSP00000266732	9606.ENSP00000300403	0	0	0	0	0.349	0	0	0.359	0.565
TMPO	TOP2A	9606.ENSP00000266732	9606.ENSP00000411532	0	0	0	0	0.504	0	0	0.178	0.575
TMPO	RRM2	9606.ENSP00000266732	9606.ENSP00000353770	0	0	0	0	0.553	0	0	0.139	0.599
TMPO	RANBP3	9606.ENSP00000266732	9606.ENSP00000341483	0	0	0	0	0.182	0	0	0.558	0.622
TMPO	NUSAP1	9606.ENSP00000266732	9606.ENSP00000453403	0	0	0	0	0.56	0.198	0	0.326	0.741
TMSB4X	PTMA	9606.ENSP00000370010	9606.ENSP00000344547	0	0	0	0	0.063	0	0	0.473	0.485
TNKS1BP1	CEP85	9606.ENSP00000437271	9606.ENSP00000252992	0	0	0	0	0	0.413	0	0	0.412
TNKS1BP1	ANKRD17	9606.ENSP00000437271	9606.ENSP00000351416	0	0	0	0	0	0.408	0	0	0.408
TNKS1BP1	EIF4B	9606.ENSP00000437271	9606.ENSP00000388806	0	0	0	0	0	0	0.9	0	0.9
TNRC6B	KMT2D	9606.ENSP00000401946	9606.ENSP00000301067	0	0	0	0	0.098	0	0.9	0	0.905
TNRC6B	ZNF703	9606.ENSP00000401946	9606.ENSP00000332325	0	0	0	0	0	0	0	0.562	0.562
TNRC6B	FOXO3	9606.ENSP00000401946	9606.ENSP00000385824	0	0	0	0	0	0	0.9	0	0.9
TOP2A	RAD51AP1	9606.ENSP00000411532	9606.ENSP00000228843	0	0	0	0	0.824	0	0	0.525	0.913
TOP2A	SRSF9	9606.ENSP00000411532	9606.ENSP00000229390	0	0	0	0	0.087	0.39	0	0.059	0.43
TOP2A	NASP	9606.ENSP00000411532	9606.ENSP00000255120	0	0	0	0	0.307	0	0	0.302	0.496
TOP2A	LIG1	9606.ENSP00000411532	9606.ENSP00000263274	0	0	0	0	0.434	0.057	0	0.397	0.65
TOP2A	GPBP1	9606.ENSP00000411532	9606.ENSP00000264779	0	0	0	0	0.063	0	0	0.731	0.737
TOP2A	MCM2	9606.ENSP00000411532	9606.ENSP00000265056	0	0	0	0	0.811	0.066	0	0.655	0.934
TOP2A	ANLN	9606.ENSP00000411532	9606.ENSP00000265748	0	0	0	0	0.834	0.27	0	0.469	0.93
TOP2A	TMPO	9606.ENSP00000411532	9606.ENSP00000266732	0	0	0	0	0.504	0	0	0.178	0.575
TOP2A	TICRR	9606.ENSP00000411532	9606.ENSP00000268138	0	0	0	0	0.579	0	0	0.192	0.645
TOP2A	NUP35	9606.ENSP00000411532	9606.ENSP00000295119	0	0	0	0	0.066	0	0.9	0.073	0.905
TOP2A	PATL1	9606.ENSP00000411532	9606.ENSP00000300146	0	0	0	0	0.063	0.331	0	0.142	0.416
TOP2A	TPX2	9606.ENSP00000411532	9606.ENSP00000300403	0	0	0	0	0.993	0	0	0.604	0.997
TOP2A	CLSPN	9606.ENSP00000411532	9606.ENSP00000312995	0	0	0	0	0.759	0	0	0.449	0.862
TOP2A	SKA3	9606.ENSP00000411532	9606.ENSP00000319417	0	0	0	0	0.764	0	0	0.233	0.811
TOP2A	RNF168	9606.ENSP00000411532	9606.ENSP00000320898	0	0	0	0	0	0.27	0	0.312	0.477
TOP2A	SRRM1	9606.ENSP00000411532	9606.ENSP00000326261	0	0	0	0	0	0	0	0.442	0.442
TOP2A	CDCA2	9606.ENSP00000411532	9606.ENSP00000328228	0	0	0	0	0.652	0	0	0.266	0.734
TOP2A	ERCC6L	9606.ENSP00000411532	9606.ENSP00000334675	0	0	0	0	0.583	0.166	0	0.543	0.827
TOP2A	DDX21	9606.ENSP00000411532	9606.ENSP00000346120	0.042	0	0	0	0.158	0.281	0	0.17	0.455
TOP2A	RRM2	9606.ENSP00000411532	9606.ENSP00000353770	0	0	0	0	0.935	0	0	0.671	0.978
TOP2A	TPR	9606.ENSP00000411532	9606.ENSP00000356448	0	0	0	0	0.221	0.146	0.9	0.045	0.928
TOP2A	MKI67	9606.ENSP00000411532	9606.ENSP00000357643	0	0	0	0	0.966	0	0	0.66	0.988
TOP2A	DKC1	9606.ENSP00000411532	9606.ENSP00000358563	0.12	0	0	0	0.16	0.346	0	0.119	0.517
TOP2A	ATRX	9606.ENSP00000411532	9606.ENSP00000362441	0	0	0	0	0.167	0.164	0	0.359	0.515
TOP2A	MDC1	9606.ENSP00000411532	9606.ENSP00000365588	0	0	0	0	0.11	0.107	0	0.9	0.915
TOP2A	SUMO1	9606.ENSP00000411532	9606.ENSP00000376077	0	0	0	0	0.064	0.382	0.8	0.416	0.923
TOP2A	SRSF2	9606.ENSP00000411532	9606.ENSP00000376276	0	0	0	0	0.099	0.499	0	0	0.529
TOP2A	INCENP	9606.ENSP00000411532	9606.ENSP00000378295	0	0	0	0	0.699	0	0	0.264	0.769
TOP2A	FOXO3	9606.ENSP00000411532	9606.ENSP00000385824	0	0	0	0	0.062	0	0	0.457	0.468
TOP2A	CHEK1	9606.ENSP00000411532	9606.ENSP00000388648	0	0	0	0	0.803	0.205	0	0.678	0.945
TOP2A	TOP2B	9606.ENSP00000411532	9606.ENSP00000396704	0	0	0	0.972	0.062	0.489	0.8	0.805	0.898
TOP2A	STMN1	9606.ENSP00000411532	9606.ENSP00000410452	0	0	0	0	0.31	0	0	0.4	0.569
TOP2A	MCM10	9606.ENSP00000411532	9606.ENSP00000418268	0	0	0	0	0.785	0	0	0.38	0.861
TOP2A	LIN52	9606.ENSP00000411532	9606.ENSP00000451812	0	0	0	0	0	0	0.9	0.064	0.902
TOP2A	BRCA1	9606.ENSP00000411532	9606.ENSP00000418960	0	0	0	0	0.676	0.383	0	0.567	0.906
TOP2A	CDCA3	9606.ENSP00000411532	9606.ENSP00000442068	0	0	0	0	0.943	0	0	0.464	0.968
TOP2A	NUSAP1	9606.ENSP00000411532	9606.ENSP00000453403	0	0	0	0	0.966	0	0	0.649	0.987
TOP2B	SRSF9	9606.ENSP00000396704	9606.ENSP00000229390	0	0	0	0	0.103	0.39	0	0.059	0.44
TOP2B	NASP	9606.ENSP00000396704	9606.ENSP00000255120	0	0	0	0	0.183	0	0	0.475	0.553
TOP2B	LIG1	9606.ENSP00000396704	9606.ENSP00000263274	0	0	0	0	0.348	0.057	0	0.404	0.602
TOP2B	TPX2	9606.ENSP00000396704	9606.ENSP00000300403	0	0	0	0	0.474	0	0	0.074	0.492
TOP2B	ERCC6L	9606.ENSP00000396704	9606.ENSP00000334675	0	0	0	0	0.102	0.164	0	0.274	0.407
TOP2B	ZNF830	9606.ENSP00000396704	9606.ENSP00000354518	0	0	0	0	0	0	0	0.501	0.501
TOP2B	DKC1	9606.ENSP00000396704	9606.ENSP00000358563	0.12	0	0	0	0.065	0.346	0	0.097	0.449
TOP2B	SUMO1	9606.ENSP00000396704	9606.ENSP00000376077	0	0	0	0	0.068	0.366	0.8	0.346	0.912
TOP2B	SRSF2	9606.ENSP00000396704	9606.ENSP00000376276	0	0	0	0	0.126	0.499	0	0	0.543
TOP2B	CHEK1	9606.ENSP00000396704	9606.ENSP00000388648	0	0	0	0	0.1	0.137	0	0.513	0.589
TOP2B	CDCA3	9606.ENSP00000396704	9606.ENSP00000442068	0	0	0	0	0.456	0	0	0.099	0.488
TOP2B	TOP2A	9606.ENSP00000396704	9606.ENSP00000411532	0	0	0	0.972	0.062	0.489	0.8	0.805	0.898
TPR	THOC2	9606.ENSP00000356448	9606.ENSP00000245838	0	0	0	0	0.546	0	0	0.486	0.756
TPR	CASC3	9606.ENSP00000356448	9606.ENSP00000264645	0	0	0	0	0.082	0	0.6	0	0.617
TPR	ZC3H13	9606.ENSP00000356448	9606.ENSP00000282007	0	0	0	0	0.534	0	0	0.249	0.635
TPR	NUP35	9606.ENSP00000356448	9606.ENSP00000295119	0	0	0	0	0.127	0	0.8	0.505	0.906
TPR	PHAX	9606.ENSP00000356448	9606.ENSP00000297540	0	0	0	0	0.086	0	0.9	0	0.904
TPR	SRRM1	9606.ENSP00000356448	9606.ENSP00000326261	0	0	0	0	0.201	0	0.6	0.113	0.691
TPR	FIP1L1	9606.ENSP00000356448	9606.ENSP00000336752	0	0	0	0	0.219	0.152	0.9	0	0.927
TPR	AHCTF1	9606.ENSP00000356448	9606.ENSP00000355465	0	0	0	0	0.586	0	0	0.719	0.879
TPR	SF1	9606.ENSP00000356448	9606.ENSP00000366604	0	0	0	0	0.289	0.192	0	0.058	0.411
TPR	SAFB	9606.ENSP00000356448	9606.ENSP00000467423	0	0	0	0	0.337	0	0	0.172	0.429
TPR	ATXN2	9606.ENSP00000356448	9606.ENSP00000366843	0	0	0	0	0.354	0.139	0	0.36	0.612
TPR	SUMO1	9606.ENSP00000356448	9606.ENSP00000376077	0	0	0	0	0.183	0.077	0.6	0.264	0.748
TPR	ATRX	9606.ENSP00000356448	9606.ENSP00000362441	0	0	0	0	0.819	0.057	0	0	0.822
TPR	SLBP	9606.ENSP00000356448	9606.ENSP00000417686	0	0	0	0	0.065	0	0.9	0.063	0.904
TPR	INCENP	9606.ENSP00000356448	9606.ENSP00000378295	0	0	0	0	0.082	0	0.9	0.123	0.912
TPR	TOP2A	9606.ENSP00000356448	9606.ENSP00000411532	0	0	0	0	0.221	0.146	0.9	0.045	0.928
TPX2	RAD51AP1	9606.ENSP00000300403	9606.ENSP00000228843	0	0	0	0	0.802	0	0	0.218	0.838
TPX2	MCM2	9606.ENSP00000300403	9606.ENSP00000265056	0	0	0	0	0.791	0	0	0.325	0.853
TPX2	ANLN	9606.ENSP00000300403	9606.ENSP00000265748	0	0	0	0	0.839	0	0	0.482	0.913
TPX2	TMPO	9606.ENSP00000300403	9606.ENSP00000266732	0	0	0	0	0.349	0	0	0.359	0.565
TPX2	TICRR	9606.ENSP00000300403	9606.ENSP00000268138	0	0	0	0	0.565	0	0	0.185	0.63
TPX2	STMN1	9606.ENSP00000300403	9606.ENSP00000410452	0	0	0	0	0.252	0	0	0.3	0.455
TPX2	TOP2B	9606.ENSP00000300403	9606.ENSP00000396704	0	0	0	0	0.474	0	0	0.074	0.492
TPX2	CLSPN	9606.ENSP00000300403	9606.ENSP00000312995	0	0	0	0	0.424	0	0	0.243	0.545
TPX2	CDCA2	9606.ENSP00000300403	9606.ENSP00000328228	0	0	0	0	0.594	0	0	0.216	0.668
TPX2	MDC1	9606.ENSP00000300403	9606.ENSP00000365588	0	0	0	0	0.088	0.391	0	0.456	0.671
TPX2	ERCC6L	9606.ENSP00000300403	9606.ENSP00000334675	0	0	0	0	0.588	0	0	0.241	0.674
TPX2	CHEK1	9606.ENSP00000300403	9606.ENSP00000388648	0	0	0	0	0.787	0	0	0.194	0.821
TPX2	MCM10	9606.ENSP00000300403	9606.ENSP00000418268	0	0	0	0	0.785	0	0	0.218	0.825
TPX2	SKA3	9606.ENSP00000300403	9606.ENSP00000319417	0	0	0	0	0.832	0	0	0.18	0.857
TPX2	BRCA1	9606.ENSP00000300403	9606.ENSP00000418960	0	0	0	0	0.411	0.682	0	0.514	0.901
TPX2	INCENP	9606.ENSP00000300403	9606.ENSP00000378295	0	0	0	0	0.689	0	0	0.699	0.902
TPX2	CDCA3	9606.ENSP00000300403	9606.ENSP00000442068	0	0	0	0	0.871	0	0	0.345	0.912
TPX2	MKI67	9606.ENSP00000300403	9606.ENSP00000357643	0	0	0	0	0.847	0.27	0	0.4	0.927
TPX2	RRM2	9606.ENSP00000300403	9606.ENSP00000353770	0	0	0	0	0.923	0	0	0.414	0.953
TPX2	NUSAP1	9606.ENSP00000300403	9606.ENSP00000453403	0	0	0	0	0.913	0	0	0.661	0.969
TPX2	TOP2A	9606.ENSP00000300403	9606.ENSP00000411532	0	0	0	0	0.993	0	0	0.604	0.997
UBAP2L	CEP85	9606.ENSP00000389445	9606.ENSP00000252992	0	0	0	0	0	0.249	0	0.28	0.436
UBAP2L	CAPRIN1	9606.ENSP00000389445	9606.ENSP00000340329	0	0	0	0	0.239	0.242	0	0.417	0.634
UBAP2L	PRRC2C	9606.ENSP00000389445	9606.ENSP00000343629	0	0	0	0	0.14	0.292	0	0.253	0.506
UBAP2L	BAG3	9606.ENSP00000389445	9606.ENSP00000358081	0	0	0	0	0.1	0.281	0	0.147	0.4
UBAP2L	YBX1	9606.ENSP00000389445	9606.ENSP00000361626	0	0	0	0	0.18	0.271	0	0.085	0.405
UBAP2L	PRRC2A	9606.ENSP00000389445	9606.ENSP00000365201	0	0	0	0	0.136	0.442	0	0.235	0.599
UBAP2L	GNL3	9606.ENSP00000389445	9606.ENSP00000395772	0	0	0	0	0.048	0	0	0.572	0.575
WAC	SNRPC	9606.ENSP00000346986	9606.ENSP00000244520	0	0	0	0	0.091	0.424	0	0.258	0.577
WAC	SART1	9606.ENSP00000346986	9606.ENSP00000310448	0	0	0	0	0.097	0.533	0	0.101	0.588
WAC	SRSF5	9606.ENSP00000346986	9606.ENSP00000452123	0	0	0	0	0.092	0.24	0	0.226	0.419
WAC	TCF12	9606.ENSP00000346986	9606.ENSP00000388940	0	0	0	0	0.127	0	0	0.44	0.49
WAC	PRRC2A	9606.ENSP00000346986	9606.ENSP00000365201	0	0	0	0	0.074	0	0	0.474	0.492
WAC	SF1	9606.ENSP00000346986	9606.ENSP00000366604	0	0	0	0	0.105	0.243	0	0.383	0.545
WBP11	ZC3H13	9606.ENSP00000261167	9606.ENSP00000282007	0	0	0	0	0.219	0.271	0	0	0.406
WBP11	ZC3H18	9606.ENSP00000261167	9606.ENSP00000416951	0	0	0	0	0.382	0.27	0	0	0.529
WBP11	C17orf85	9606.ENSP00000261167	9606.ENSP00000373657	0	0	0	0	0.113	0	0	0.619	0.648
YAF2	RYBP	9606.ENSP00000328004	9606.ENSP00000419494	0	0	0	0.932	0	0.632	0.3	0.943	0.748
YAF2	BCOR	9606.ENSP00000328004	9606.ENSP00000367705	0	0	0	0	0	0.898	0	0.682	0.966
YBX1	YBX3	9606.ENSP00000361626	9606.ENSP00000228251	0	0	0	0.925	0.12	0.486	0	0.808	0.556
YBX1	SRSF9	9606.ENSP00000361626	9606.ENSP00000229390	0.051	0	0	0	0.102	0.473	0	0.555	0.774
YBX1	SNRPC	9606.ENSP00000361626	9606.ENSP00000244520	0	0	0	0	0.131	0	0	0.4	0.457
YBX1	CPEB4	9606.ENSP00000361626	9606.ENSP00000265085	0	0	0	0	0.062	0.149	0.54	0.076	0.615
YBX1	HNRNPD	9606.ENSP00000361626	9606.ENSP00000313199	0	0	0	0	0.104	0.538	0	0.806	0.913
YBX1	LARP1	9606.ENSP00000361626	9606.ENSP00000336721	0	0	0	0	0.163	0.504	0	0.49	0.77
YBX1	CAPRIN1	9606.ENSP00000361626	9606.ENSP00000340329	0	0	0	0	0.215	0.27	0	0.492	0.684
YBX1	DDX21	9606.ENSP00000361626	9606.ENSP00000346120	0.046	0	0	0	0.122	0.551	0	0.249	0.68
YBX1	HNRNPAB	9606.ENSP00000361626	9606.ENSP00000351108	0	0	0	0	0.184	0.405	0	0.131	0.541
YBX1	SPN	9606.ENSP00000361626	9606.ENSP00000353238	0	0	0	0	0	0	0	0.539	0.539
YBX1	SERBP1	9606.ENSP00000361626	9606.ENSP00000360034	0	0	0	0	0.284	0.426	0	0.15	0.62
YBX1	UBAP2L	9606.ENSP00000361626	9606.ENSP00000389445	0	0	0	0	0.18	0.271	0	0.085	0.405
YBX1	SRSF5	9606.ENSP00000361626	9606.ENSP00000452123	0.051	0	0	0	0.11	0.057	0	0.374	0.435
YBX1	ATXN2	9606.ENSP00000361626	9606.ENSP00000366843	0	0	0	0	0	0.368	0	0.241	0.5
YBX1	BTF3	9606.ENSP00000361626	9606.ENSP00000369965	0	0	0	0	0.47	0.248	0	0.111	0.615
YBX1	GTF2F1	9606.ENSP00000361626	9606.ENSP00000377969	0	0	0	0	0.082	0	0.6	0	0.617
YBX1	SLBP	9606.ENSP00000361626	9606.ENSP00000417686	0	0	0	0	0.062	0	0.72	0.1	0.742
YBX1	NACA	9606.ENSP00000361626	9606.ENSP00000448035	0	0	0	0	0.349	0.79	0	0.052	0.859
YBX1	SRSF2	9606.ENSP00000361626	9606.ENSP00000376276	0	0	0	0	0.108	0	0.8	0.358	0.875
YBX3	CCDC86	9606.ENSP00000228251	9606.ENSP00000227520	0	0	0	0	0	0	0	0.406	0.406
YBX3	SPN	9606.ENSP00000228251	9606.ENSP00000353238	0	0	0	0	0	0	0	0.537	0.537
YBX3	YBX1	9606.ENSP00000228251	9606.ENSP00000361626	0	0	0	0.925	0.12	0.486	0	0.808	0.556
ZC3H11A	SRSF9	9606.ENSP00000438527	9606.ENSP00000229390	0	0	0	0	0.081	0	0.6	0.052	0.621
ZC3H11A	THOC2	9606.ENSP00000438527	9606.ENSP00000245838	0	0	0	0	0.187	0.387	0.6	0.293	0.84
ZC3H11A	CASC3	9606.ENSP00000438527	9606.ENSP00000264645	0	0	0	0	0	0	0.6	0.452	0.771
ZC3H11A	SRRM1	9606.ENSP00000438527	9606.ENSP00000326261	0	0	0	0	0.174	0	0.6	0	0.655
ZC3H11A	FIP1L1	9606.ENSP00000438527	9606.ENSP00000336752	0	0	0	0	0.105	0	0.6	0	0.627
ZC3H11A	PRRC2C	9606.ENSP00000438527	9606.ENSP00000343629	0	0	0	0	0.139	0	0	0.604	0.644
ZC3H11A	ZRANB2	9606.ENSP00000438527	9606.ENSP00000359958	0	0	0	0	0.103	0	0	0.455	0.49
ZC3H11A	SF1	9606.ENSP00000438527	9606.ENSP00000366604	0	0	0	0	0.132	0.271	0	0.181	0.436
ZC3H11A	C17orf85	9606.ENSP00000438527	9606.ENSP00000373657	0	0	0	0	0.109	0.679	0	0	0.701
ZC3H11A	SRSF2	9606.ENSP00000438527	9606.ENSP00000376276	0	0	0	0	0.153	0	0.6	0.201	0.705
ZC3H11A	ZC3H18	9606.ENSP00000438527	9606.ENSP00000416951	0	0	0	0	0.144	0.409	0	0	0.472
ZC3H11A	BCLAF1	9606.ENSP00000438527	9606.ENSP00000435210	0	0	0	0	0.177	0.47	0	0	0.545
ZC3H11A	SRSF5	9606.ENSP00000438527	9606.ENSP00000452123	0	0	0	0	0.088	0	0.6	0.045	0.621
ZC3H13	WBP11	9606.ENSP00000282007	9606.ENSP00000261167	0	0	0	0	0.219	0.271	0	0	0.406
ZC3H13	MED19	9606.ENSP00000282007	9606.ENSP00000337340	0	0	0	0	0	0.27	0	0.289	0.459
ZC3H13	THRAP3	9606.ENSP00000282007	9606.ENSP00000346634	0	0	0	0	0.143	0	0	0.395	0.459
ZC3H13	SPEN	9606.ENSP00000282007	9606.ENSP00000364912	0	0	0	0	0.105	0.391	0	0.091	0.461
ZC3H13	DDX21	9606.ENSP00000282007	9606.ENSP00000346120	0	0	0	0	0.382	0.213	0	0.101	0.525
ZC3H13	ZC3H18	9606.ENSP00000282007	9606.ENSP00000416951	0	0	0	0.547	0.228	0.41	0	0.196	0.56
ZC3H13	TPR	9606.ENSP00000282007	9606.ENSP00000356448	0	0	0	0	0.534	0	0	0.249	0.635
ZC3H13	PRRC2C	9606.ENSP00000282007	9606.ENSP00000343629	0	0	0	0	0.652	0	0	0.067	0.661
ZC3H18	THOC2	9606.ENSP00000416951	9606.ENSP00000245838	0	0	0	0	0.098	0.27	0	0.451	0.607
ZC3H18	ZC3H4	9606.ENSP00000416951	9606.ENSP00000253048	0	0	0	0	0.274	0.27	0	0	0.447
ZC3H18	PPIG	9606.ENSP00000416951	9606.ENSP00000260970	0	0	0	0	0.157	0.413	0	0	0.484
ZC3H18	WBP11	9606.ENSP00000416951	9606.ENSP00000261167	0	0	0	0	0.382	0.27	0	0	0.529
ZC3H18	ACIN1	9606.ENSP00000416951	9606.ENSP00000262710	0	0	0	0	0.129	0.735	0	0	0.759
ZC3H18	FNBP4	9606.ENSP00000416951	9606.ENSP00000263773	0	0	0	0	0.306	0.41	0	0	0.573
ZC3H18	ZC3H13	9606.ENSP00000416951	9606.ENSP00000282007	0	0	0	0.547	0.228	0.41	0	0.196	0.56
ZC3H18	PHAX	9606.ENSP00000416951	9606.ENSP00000297540	0	0	0	0	0.273	0	0	0.392	0.539
ZC3H18	SRRM2	9606.ENSP00000416951	9606.ENSP00000301740	0	0	0	0	0.118	0.823	0	0	0.837
ZC3H18	SRRM1	9606.ENSP00000416951	9606.ENSP00000326261	0	0	0	0	0.211	0.411	0	0.093	0.541
ZC3H18	FIP1L1	9606.ENSP00000416951	9606.ENSP00000336752	0	0	0	0	0.047	0.46	0	0	0.463
ZC3H18	THRAP3	9606.ENSP00000416951	9606.ENSP00000346634	0	0	0	0	0.099	0.27	0	0.391	0.564
ZC3H18	HNRNPAB	9606.ENSP00000416951	9606.ENSP00000351108	0	0	0	0	0.067	0.27	0	0.265	0.456
ZC3H18	SF1	9606.ENSP00000416951	9606.ENSP00000366604	0	0	0	0	0.163	0.486	0	0	0.551
ZC3H18	TCOF1	9606.ENSP00000416951	9606.ENSP00000367028	0	0	0	0	0.376	0.27	0	0	0.525
ZC3H18	PSIP1	9606.ENSP00000416951	9606.ENSP00000370109	0	0	0	0	0.055	0.489	0	0	0.496
ZC3H18	SRSF2	9606.ENSP00000416951	9606.ENSP00000376276	0	0	0	0	0.305	0.27	0	0.107	0.507
ZC3H18	ZC3H11A	9606.ENSP00000416951	9606.ENSP00000438527	0	0	0	0	0.144	0.409	0	0	0.472
ZC3H18	ZNHIT3	9606.ENSP00000416951	9606.ENSP00000484687	0	0	0	0	0	0.27	0	0.337	0.495
ZC3H18	BCLAF1	9606.ENSP00000416951	9606.ENSP00000435210	0	0	0	0	0.113	0.27	0	0.339	0.534
ZC3H18	SAFB	9606.ENSP00000416951	9606.ENSP00000467423	0	0	0	0	0.145	0.489	0	0.094	0.569
ZC3H18	SRRT	9606.ENSP00000416951	9606.ENSP00000480421	0	0	0	0	0.194	0.678	0	0.336	0.812
ZC3H4	ZC3H18	9606.ENSP00000253048	9606.ENSP00000416951	0	0	0	0	0.274	0.27	0	0	0.447
ZC3H4	FIP1L1	9606.ENSP00000253048	9606.ENSP00000336752	0	0	0	0	0.075	0.608	0	0.377	0.754
ZEB1	TCF3	9606.ENSP00000354487	9606.ENSP00000262965	0	0	0	0	0.062	0.212	0	0.411	0.527
ZEB1	BRCA1	9606.ENSP00000354487	9606.ENSP00000418960	0	0	0	0	0	0	0	0.404	0.404
ZEB1	CXCR4	9606.ENSP00000354487	9606.ENSP00000386884	0	0	0	0	0	0	0	0.422	0.422
ZEB1	RYBP	9606.ENSP00000354487	9606.ENSP00000419494	0	0	0	0	0	0	0	0.45	0.45
ZEB1	CHEK1	9606.ENSP00000354487	9606.ENSP00000388648	0	0	0	0	0	0.27	0	0.294	0.462
ZEB1	TCF12	9606.ENSP00000354487	9606.ENSP00000388940	0	0	0	0	0.064	0.388	0	0.507	0.692
ZEB1	ZEB2	9606.ENSP00000354487	9606.ENSP00000454157	0	0	0	0.904	0.084	0	0.8	0.914	0.825
ZEB1	SUMO1	9606.ENSP00000354487	9606.ENSP00000376077	0	0	0	0	0	0.105	0.9	0.119	0.914
ZEB1	FOXO3	9606.ENSP00000354487	9606.ENSP00000385824	0	0	0	0	0	0	0.9	0.342	0.931
ZEB2	TCF3	9606.ENSP00000454157	9606.ENSP00000262965	0	0	0	0	0.062	0.212	0	0.362	0.487
ZEB2	ZEB1	9606.ENSP00000454157	9606.ENSP00000354487	0	0	0	0.904	0.084	0	0.8	0.914	0.825
ZEB2	TCF12	9606.ENSP00000454157	9606.ENSP00000388940	0	0	0	0	0.063	0.233	0	0.343	0.486
ZFAND2B	PSME3	9606.ENSP00000289528	9606.ENSP00000293362	0	0	0	0	0	0.105	0	0.388	0.429
ZFAND2B	PRRC2A	9606.ENSP00000289528	9606.ENSP00000365201	0	0	0	0	0	0.392	0	0.21	0.499
ZNF148	MDC1	9606.ENSP00000353863	9606.ENSP00000365588	0	0	0	0	0	0.471	0	0.054	0.479
ZNF703	TNRC6B	9606.ENSP00000332325	9606.ENSP00000401946	0	0	0	0	0	0	0	0.562	0.562
ZNF830	TOP2B	9606.ENSP00000354518	9606.ENSP00000396704	0	0	0	0	0	0	0	0.501	0.501
ZNF830	TCEA1	9606.ENSP00000354518	9606.ENSP00000428426	0	0	0	0	0.062	0	0.6	0	0.608
ZNHIT3	JMJD1C	9606.ENSP00000484687	9606.ENSP00000382204	0	0	0	0	0	0	0	0.421	0.421
ZNHIT3	ZC3H18	9606.ENSP00000484687	9606.ENSP00000416951	0	0	0	0	0	0.27	0	0.337	0.495
ZRANB2	CASC3	9606.ENSP00000359958	9606.ENSP00000264645	0	0	0	0	0	0	0	0.508	0.508
ZRANB2	SRRM2	9606.ENSP00000359958	9606.ENSP00000301740	0	0	0	0	0.073	0	0	0.596	0.609
ZRANB2	SRRM1	9606.ENSP00000359958	9606.ENSP00000326261	0	0	0	0	0.128	0	0	0.507	0.552
ZRANB2	THRAP3	9606.ENSP00000359958	9606.ENSP00000346634	0	0	0	0	0.09	0	0	0.377	0.409
ZRANB2	SERBP1	9606.ENSP00000359958	9606.ENSP00000360034	0	0	0	0	0.212	0.056	0	0.302	0.436
ZRANB2	SRSF2	9606.ENSP00000359958	9606.ENSP00000376276	0	0	0	0	0.149	0.243	0	0.225	0.458
ZRANB2	ZC3H11A	9606.ENSP00000359958	9606.ENSP00000438527	0	0	0	0	0.103	0	0	0.455	0.49
ZRANB2	BCLAF1	9606.ENSP00000359958	9606.ENSP00000435210	0	0	0	0	0.34	0	0	0.422	0.603
ZRANB2	GTF2F1	9606.ENSP00000359958	9606.ENSP00000377969	0	0	0	0	0.095	0	0	0.613	0.635
ZRANB2	SFSWAP	9606.ENSP00000359958	9606.ENSP00000437738	0	0	0	0	0.093	0	0	0.634	0.654

## Sheet: DOWN in REL_No CHK1_Medium
#node1	node2	node1_string_id	node2_string_id	neighborhood_on_chromosome	gene_fusion	phylogenetic_cooccurrence	homology	coexpression	experimentally_determined_interaction	database_annotated	automated_textmining	combined_score
ABCF1	NUFIP2	9606.ENSP00000313603	9606.ENSP00000225388	0	0	0	0	0.079	0	0.72	0.136	0.757
ABCF1	BTF3	9606.ENSP00000313603	9606.ENSP00000369965	0	0	0	0	0.11	0	0.54	0.043	0.574
ABCF1	LARP4B	9606.ENSP00000313603	9606.ENSP00000482767	0	0	0	0	0.1	0	0.9	0	0.906
ACIN1	SF1	9606.ENSP00000262710	9606.ENSP00000366604	0	0	0	0	0.162	0.27	0	0.101	0.402
ACIN1	BCLAF1	9606.ENSP00000262710	9606.ENSP00000435210	0	0	0	0	0.181	0	0	0.301	0.403
ACIN1	SRRT	9606.ENSP00000262710	9606.ENSP00000480421	0	0	0	0	0.26	0	0	0.234	0.41
ACIN1	SUMO1	9606.ENSP00000262710	9606.ENSP00000376077	0	0	0	0	0.146	0	0	0.379	0.447
ACIN1	THRAP3	9606.ENSP00000262710	9606.ENSP00000346634	0	0	0	0	0.105	0.129	0	0.348	0.447
ACIN1	CASC3	9606.ENSP00000262710	9606.ENSP00000264645	0	0	0	0	0.065	0	0	0.456	0.47
ACIN1	C17orf85	9606.ENSP00000262710	9606.ENSP00000373657	0	0	0	0	0.17	0.477	0	0.154	0.6
ACIN1	SAFB	9606.ENSP00000262710	9606.ENSP00000467423	0	0	0	0	0.287	0.414	0	0.372	0.715
ACIN1	SRRM1	9606.ENSP00000262710	9606.ENSP00000326261	0	0	0	0	0.318	0.39	0	0.447	0.75
ACIN1	ZC3H18	9606.ENSP00000262710	9606.ENSP00000416951	0	0	0	0	0.129	0.735	0	0	0.759
ACIN1	SRRM2	9606.ENSP00000262710	9606.ENSP00000301740	0	0	0	0	0.775	0.681	0	0.432	0.955
ADD1	ADD2	9606.ENSP00000264758	9606.ENSP00000264436	0	0	0.414	0.922	0.062	0.717	0.8	0.972	0.948
ADD1	DMTN	9606.ENSP00000264758	9606.ENSP00000427866	0	0	0	0	0.083	0.246	0.6	0.607	0.876
ADD2	HEMGN	9606.ENSP00000264436	9606.ENSP00000480020	0	0	0	0	0.063	0	0	0.486	0.497
ADD2	ANK1	9606.ENSP00000264436	9606.ENSP00000265709	0	0	0	0	0.137	0.056	0	0.489	0.547
ADD2	ADD1	9606.ENSP00000264436	9606.ENSP00000264758	0	0	0.414	0.922	0.062	0.717	0.8	0.972	0.948
ADD2	DMTN	9606.ENSP00000264436	9606.ENSP00000427866	0	0	0	0	0.065	0.394	0.6	0.817	0.952
AHCTF1	MCM2	9606.ENSP00000355465	9606.ENSP00000265056	0	0	0	0	0.072	0	0	0.786	0.793
AHCTF1	NUP35	9606.ENSP00000355465	9606.ENSP00000295119	0	0	0	0	0.081	0.39	0.6	0.826	0.955
AHCTF1	CDCA2	9606.ENSP00000355465	9606.ENSP00000328228	0	0	0	0	0.069	0	0	0.482	0.497
AHCTF1	GPATCH4	9606.ENSP00000355465	9606.ENSP00000396441	0	0	0	0	0.048	0	0	0.396	0.4
AHCTF1	INCENP	9606.ENSP00000355465	9606.ENSP00000378295	0	0	0	0	0.082	0	0	0.382	0.408
AHCTF1	TPR	9606.ENSP00000355465	9606.ENSP00000356448	0	0	0	0	0.586	0	0	0.719	0.879
AHSP	HEMGN	9606.ENSP00000307199	9606.ENSP00000480020	0	0	0	0	0.207	0	0	0.285	0.409
AHSP	GYPA	9606.ENSP00000307199	9606.ENSP00000354003	0	0	0	0	0.189	0	0	0.392	0.485
AHSP	DMTN	9606.ENSP00000307199	9606.ENSP00000427866	0	0	0	0	0.318	0	0	0.468	0.621
AHSP	BCL11A	9606.ENSP00000307199	9606.ENSP00000338774	0	0	0	0	0	0	0	0.682	0.682
AKAP12	SRRM2	9606.ENSP00000384537	9606.ENSP00000301740	0	0	0	0	0	0	0	0.508	0.508
AKAP12	AKAP13	9606.ENSP00000384537	9606.ENSP00000354718	0	0	0	0	0	0	0	0.758	0.759
AKAP13	SAMD14	9606.ENSP00000354718	9606.ENSP00000424474	0	0	0	0	0.062	0.074	0	0.448	0.479
AKAP13	AKAP12	9606.ENSP00000354718	9606.ENSP00000384537	0	0	0	0	0	0	0	0.758	0.759
AMMECR1	THOC2	9606.ENSP00000262844	9606.ENSP00000245838	0	0	0	0	0.558	0	0	0.228	0.644
ANK1	ADD2	9606.ENSP00000265709	9606.ENSP00000264436	0	0	0	0	0.137	0.056	0	0.489	0.547
ANK1	GYPA	9606.ENSP00000265709	9606.ENSP00000354003	0	0	0	0	0.099	0	0	0.427	0.462
ANK1	DMTN	9606.ENSP00000265709	9606.ENSP00000427866	0	0	0	0	0.117	0	0	0.507	0.546
ANKRD17	CEP85	9606.ENSP00000351416	9606.ENSP00000252992	0	0	0	0	0	0.406	0	0	0.406
ANKRD17	LARP1	9606.ENSP00000351416	9606.ENSP00000336721	0	0	0	0	0.121	0.076	0	0.333	0.411
ANKRD17	PRRC2C	9606.ENSP00000351416	9606.ENSP00000343629	0	0	0	0	0.327	0.421	0	0	0.593
ANKRD17	TNKS1BP1	9606.ENSP00000351416	9606.ENSP00000437271	0	0	0	0	0	0.408	0	0	0.408
ANLN	RAD51AP1	9606.ENSP00000265748	9606.ENSP00000228843	0	0	0	0	0.778	0	0	0.134	0.799
ANLN	SPECC1	9606.ENSP00000265748	9606.ENSP00000261503	0	0	0	0	0	0.444	0	0.062	0.456
ANLN	MCM2	9606.ENSP00000265748	9606.ENSP00000265056	0	0	0	0	0.523	0	0	0.201	0.603
ANLN	MDC1	9606.ENSP00000265748	9606.ENSP00000365588	0	0	0	0	0.097	0.391	0	0.063	0.44
ANLN	TICRR	9606.ENSP00000265748	9606.ENSP00000268138	0	0	0	0	0.329	0	0	0.241	0.468
ANLN	STMN1	9606.ENSP00000265748	9606.ENSP00000410452	0	0	0	0	0.186	0	0	0.413	0.502
ANLN	CDCA3	9606.ENSP00000265748	9606.ENSP00000442068	0	0	0	0	0.243	0	0	0.37	0.503
ANLN	TMPO	9606.ENSP00000265748	9606.ENSP00000266732	0	0	0	0	0.349	0.27	0	0.208	0.591
ANLN	MCM10	9606.ENSP00000265748	9606.ENSP00000418268	0	0	0	0	0.583	0	0	0.081	0.6
ANLN	BRCA1	9606.ENSP00000265748	9606.ENSP00000418960	0	0	0	0	0.3	0.391	0	0.143	0.603
ANLN	ERCC6L	9606.ENSP00000265748	9606.ENSP00000334675	0	0	0	0	0.561	0	0	0.155	0.613
ANLN	SKA3	9606.ENSP00000265748	9606.ENSP00000319417	0	0	0	0	0.543	0	0	0.217	0.627
ANLN	CDCA2	9606.ENSP00000265748	9606.ENSP00000328228	0	0	0	0	0.568	0	0	0.345	0.705
ANLN	MKI67	9606.ENSP00000265748	9606.ENSP00000357643	0	0	0	0	0.59	0.27	0	0.287	0.768
ANLN	INCENP	9606.ENSP00000265748	9606.ENSP00000378295	0	0	0	0	0.589	0.27	0	0.566	0.858
ANLN	RRM2	9606.ENSP00000265748	9606.ENSP00000353770	0	0	0	0	0.794	0	0	0.369	0.865
ANLN	NUSAP1	9606.ENSP00000265748	9606.ENSP00000453403	0	0	0	0	0.811	0	0	0.363	0.874
ANLN	TPX2	9606.ENSP00000265748	9606.ENSP00000300403	0	0	0	0	0.839	0	0	0.482	0.913
ANLN	TOP2A	9606.ENSP00000265748	9606.ENSP00000411532	0	0	0	0	0.834	0.27	0	0.469	0.93
APC	CEP85	9606.ENSP00000257430	9606.ENSP00000252992	0	0	0	0	0	0.409	0	0	0.408
APC	KMT2D	9606.ENSP00000257430	9606.ENSP00000301067	0	0	0	0	0.062	0	0.65	0.084	0.673
APLF	MDC1	9606.ENSP00000307004	9606.ENSP00000365588	0	0	0	0	0	0	0	0.461	0.461
ARGLU1	FNBP4	9606.ENSP00000383059	9606.ENSP00000263773	0	0	0	0	0.46	0	0	0	0.46
ARGLU1	SRSF5	9606.ENSP00000383059	9606.ENSP00000452123	0	0	0	0	0.249	0.064	0	0.228	0.411
ARPP19	SMNDC1	9606.ENSP00000455625	9606.ENSP00000358616	0	0	0	0	0.112	0	0	0.672	0.697
ATF1	TCF12	9606.ENSP00000262053	9606.ENSP00000388940	0	0	0	0	0	0	0.6	0.102	0.625
ATF7	INCENP	9606.ENSP00000399465	9606.ENSP00000378295	0	0	0	0	0	0	0	0.41	0.41
ATF7	ATF7IP	9606.ENSP00000399465	9606.ENSP00000440440	0	0	0	0	0.059	0.173	0	0.64	0.696
ATF7IP	SUMO1	9606.ENSP00000440440	9606.ENSP00000376077	0	0	0	0	0	0.135	0	0.415	0.472
ATF7IP	ATF7	9606.ENSP00000440440	9606.ENSP00000399465	0	0	0	0	0.059	0.173	0	0.64	0.696
ATF7IP	MBD1	9606.ENSP00000440440	9606.ENSP00000468785	0	0	0	0	0	0.675	0	0.798	0.931
ATRX	RAD51AP1	9606.ENSP00000362441	9606.ENSP00000228843	0	0	0	0	0.062	0	0	0.493	0.504
ATRX	THOC2	9606.ENSP00000362441	9606.ENSP00000245838	0	0	0	0	0.683	0.077	0	0.186	0.741
ATRX	PPIG	9606.ENSP00000362441	9606.ENSP00000260970	0	0	0	0	0.254	0.077	0	0.697	0.773
ATRX	LIG1	9606.ENSP00000362441	9606.ENSP00000263274	0	0	0	0	0.063	0.102	0	0.507	0.549
ATRX	MCM2	9606.ENSP00000362441	9606.ENSP00000265056	0	0	0	0	0.083	0.149	0	0.335	0.436
ATRX	KMT2D	9606.ENSP00000362441	9606.ENSP00000301067	0	0	0	0	0.064	0.153	0	0.476	0.548
ATRX	BDP1	9606.ENSP00000362441	9606.ENSP00000351575	0	0	0	0	0.826	0.058	0	0.048	0.831
ATRX	TCF20	9606.ENSP00000362441	9606.ENSP00000352463	0	0	0	0	0.153	0.153	0	0.258	0.421
ATRX	TPR	9606.ENSP00000362441	9606.ENSP00000356448	0	0	0	0	0.819	0.057	0	0	0.822
ATRX	BCOR	9606.ENSP00000362441	9606.ENSP00000367705	0	0	0	0	0	0	0	0.414	0.414
ATRX	BCLAF1	9606.ENSP00000362441	9606.ENSP00000435210	0	0	0	0	0.182	0	0	0.338	0.435
ATRX	SUMO1	9606.ENSP00000362441	9606.ENSP00000376077	0	0	0	0	0.062	0.212	0	0.314	0.448
ATRX	TOP2A	9606.ENSP00000362441	9606.ENSP00000411532	0	0	0	0	0.167	0.164	0	0.359	0.515
ATRX	MDC1	9606.ENSP00000362441	9606.ENSP00000365588	0	0	0	0	0.063	0.164	0	0.466	0.545
ATRX	SPEN	9606.ENSP00000362441	9606.ENSP00000364912	0	0	0	0	0.068	0	0	0.639	0.65
ATRX	BRCA1	9606.ENSP00000362441	9606.ENSP00000418960	0	0	0	0	0.062	0.056	0	0.771	0.78
ATXN2	NUFIP2	9606.ENSP00000366843	9606.ENSP00000225388	0	0	0	0	0.047	0.628	0	0.185	0.685
ATXN2	CASC3	9606.ENSP00000366843	9606.ENSP00000264645	0	0	0	0	0	0.411	0	0.205	0.512
ATXN2	PATL1	9606.ENSP00000366843	9606.ENSP00000300146	0	0	0	0	0.066	0	0	0.445	0.46
ATXN2	BIN1	9606.ENSP00000366843	9606.ENSP00000316779	0	0	0	0	0	0.424	0	0.054	0.432
ATXN2	LARP1	9606.ENSP00000366843	9606.ENSP00000336721	0	0	0	0	0.06	0.346	0	0.109	0.404
ATXN2	CAPRIN1	9606.ENSP00000366843	9606.ENSP00000340329	0	0	0	0	0.064	0.284	0	0.543	0.668
ATXN2	PRRC2B	9606.ENSP00000366843	9606.ENSP00000349856	0	0	0	0	0.089	0.375	0	0.086	0.434
ATXN2	TPR	9606.ENSP00000366843	9606.ENSP00000356448	0	0	0	0	0.354	0.139	0	0.36	0.612
ATXN2	YBX1	9606.ENSP00000366843	9606.ENSP00000361626	0	0	0	0	0	0.368	0	0.241	0.5
ATXN2	EIF4ENIF1	9606.ENSP00000366843	9606.ENSP00000380659	0	0	0	0	0.062	0.206	0	0.29	0.425
ATXN2	SYNJ1	9606.ENSP00000366843	9606.ENSP00000409667	0	0	0	0	0.063	0	0	0.486	0.498
BAG3	NUFIP2	9606.ENSP00000358081	9606.ENSP00000225388	0	0	0	0	0.06	0	0	0.569	0.578
BAG3	UBAP2L	9606.ENSP00000358081	9606.ENSP00000389445	0	0	0	0	0.1	0.281	0	0.147	0.4
BAG3	BCLAF1	9606.ENSP00000358081	9606.ENSP00000435210	0	0	0	0	0.061	0.27	0	0.451	0.591
BCL11A	TCF3	9606.ENSP00000338774	9606.ENSP00000262965	0	0	0	0	0	0.058	0	0.464	0.473
BCL11A	TAL1	9606.ENSP00000338774	9606.ENSP00000294339	0	0	0	0	0.063	0.066	0	0.591	0.611
BCL11A	AHSP	9606.ENSP00000338774	9606.ENSP00000307199	0	0	0	0	0	0	0	0.682	0.682
BCL11A	RERE	9606.ENSP00000338774	9606.ENSP00000338629	0	0	0	0	0	0.066	0	0.43	0.444
BCL11A	GYPA	9606.ENSP00000338774	9606.ENSP00000354003	0	0	0	0	0	0	0	0.408	0.408
BCL11A	BCL7A	9606.ENSP00000338774	9606.ENSP00000445868	0	0	0	0	0.062	0	0	0.429	0.441
BCL11A	RAD23A	9606.ENSP00000338774	9606.ENSP00000467024	0	0	0	0	0	0.077	0	0.434	0.455
BCL11A	BCL7B	9606.ENSP00000338774	9606.ENSP00000411073	0	0	0	0	0	0	0	0.458	0.458
BCL11A	SUMO1	9606.ENSP00000338774	9606.ENSP00000376077	0	0	0	0	0	0.143	0	0.408	0.471
BCL11A	TCF12	9606.ENSP00000338774	9606.ENSP00000388940	0	0	0	0	0.062	0.058	0	0.462	0.484
BCL11A	SOX6	9606.ENSP00000338774	9606.ENSP00000379644	0	0	0	0	0.066	0.101	0	0.917	0.925
BCL7A	BCL11A	9606.ENSP00000445868	9606.ENSP00000338774	0	0	0	0	0.062	0	0	0.429	0.441
BCL7B	BCL11A	9606.ENSP00000411073	9606.ENSP00000338774	0	0	0	0	0	0	0	0.458	0.458
BCLAF1	SRSF9	9606.ENSP00000435210	9606.ENSP00000229390	0	0	0	0	0.136	0.198	0	0.29	0.465
BCLAF1	THOC2	9606.ENSP00000435210	9606.ENSP00000245838	0	0	0	0	0.307	0.479	0	0	0.623
BCLAF1	ACIN1	9606.ENSP00000435210	9606.ENSP00000262710	0	0	0	0	0.181	0	0	0.301	0.403
BCLAF1	MED26	9606.ENSP00000435210	9606.ENSP00000263390	0	0	0	0	0.065	0	0.54	0	0.551
BCLAF1	PSME3	9606.ENSP00000435210	9606.ENSP00000293362	0	0	0	0	0.273	0.27	0	0.562	0.747
BCLAF1	HNRNPD	9606.ENSP00000435210	9606.ENSP00000313199	0	0	0	0	0.556	0	0	0.072	0.571
BCLAF1	SRRM1	9606.ENSP00000435210	9606.ENSP00000326261	0	0	0	0	0.214	0.075	0	0.274	0.427
BCLAF1	MED19	9606.ENSP00000435210	9606.ENSP00000337340	0	0	0	0	0	0	0.54	0	0.54
BCLAF1	THRAP3	9606.ENSP00000435210	9606.ENSP00000346634	0	0	0	0.806	0.228	0.843	0.54	0.959	0.95
BCLAF1	BAG3	9606.ENSP00000435210	9606.ENSP00000358081	0	0	0	0	0.061	0.27	0	0.451	0.591
BCLAF1	ZRANB2	9606.ENSP00000435210	9606.ENSP00000359958	0	0	0	0	0.34	0	0	0.422	0.603
BCLAF1	ATRX	9606.ENSP00000435210	9606.ENSP00000362441	0	0	0	0	0.182	0	0	0.338	0.435
BCLAF1	SRSF2	9606.ENSP00000435210	9606.ENSP00000376276	0	0	0	0	0.335	0	0	0.214	0.455
BCLAF1	ZC3H18	9606.ENSP00000435210	9606.ENSP00000416951	0	0	0	0	0.113	0.27	0	0.339	0.534
BCLAF1	BRCA1	9606.ENSP00000435210	9606.ENSP00000418960	0	0	0	0	0.062	0	0	0.973	0.973
BCLAF1	SAFB	9606.ENSP00000435210	9606.ENSP00000467423	0	0	0	0	0.304	0	0	0.174	0.4
BCLAF1	ZC3H11A	9606.ENSP00000435210	9606.ENSP00000438527	0	0	0	0	0.177	0.47	0	0	0.545
BCOR	KMT2D	9606.ENSP00000367705	9606.ENSP00000301067	0	0	0	0	0.062	0	0	0.529	0.54
BCOR	YAF2	9606.ENSP00000367705	9606.ENSP00000328004	0	0	0	0	0	0.898	0	0.682	0.966
BCOR	FIP1L1	9606.ENSP00000367705	9606.ENSP00000336752	0	0	0	0	0	0	0	0.514	0.514
BCOR	ATRX	9606.ENSP00000367705	9606.ENSP00000362441	0	0	0	0	0	0	0	0.414	0.414
BCOR	SRSF2	9606.ENSP00000367705	9606.ENSP00000376276	0	0	0	0	0	0	0	0.664	0.664
BCOR	RYBP	9606.ENSP00000367705	9606.ENSP00000419494	0	0	0	0	0	0.887	0	0.927	0.991
BDP1	RIF1	9606.ENSP00000351575	9606.ENSP00000243326	0	0	0	0	0.831	0	0	0	0.831
BDP1	TCEA1	9606.ENSP00000351575	9606.ENSP00000428426	0	0	0	0	0.062	0.212	0	0.37	0.493
BDP1	EPS15	9606.ENSP00000351575	9606.ENSP00000360798	0	0	0	0	0.089	0	0	0.472	0.498
BDP1	POLR3G	9606.ENSP00000351575	9606.ENSP00000382058	0	0	0	0	0	0	0.6	0.529	0.803
BDP1	ATRX	9606.ENSP00000351575	9606.ENSP00000362441	0	0	0	0	0.826	0.058	0	0.048	0.831
BIN1	SRSF9	9606.ENSP00000316779	9606.ENSP00000229390	0	0	0	0	0	0.086	0	0.445	0.471
BIN1	BIN2	9606.ENSP00000316779	9606.ENSP00000267012	0	0	0	0.831	0	0.74	0.9	0.878	0.976
BIN1	ATXN2	9606.ENSP00000316779	9606.ENSP00000366843	0	0	0	0	0	0.424	0	0.054	0.432
BIN1	EPS15	9606.ENSP00000316779	9606.ENSP00000360798	0	0	0	0	0.064	0.246	0.9	0.584	0.966
BIN1	SYNJ1	9606.ENSP00000316779	9606.ENSP00000409667	0	0	0	0	0.053	0.325	0.9	0.548	0.967
BIN2	BRCA1	9606.ENSP00000267012	9606.ENSP00000418960	0	0	0	0	0	0	0	0.449	0.449
BIN2	SASH3	9606.ENSP00000267012	9606.ENSP00000349359	0	0	0	0	0.35	0	0	0.22	0.471
BIN2	SYNJ1	9606.ENSP00000267012	9606.ENSP00000409667	0	0	0	0	0.053	0.104	0.9	0.146	0.917
BIN2	EPS15	9606.ENSP00000267012	9606.ENSP00000360798	0	0	0	0	0.064	0.246	0.9	0.251	0.94
BIN2	BIN1	9606.ENSP00000267012	9606.ENSP00000316779	0	0	0	0.831	0	0.74	0.9	0.878	0.976
BMP2K	EPS15	9606.ENSP00000334836	9606.ENSP00000360798	0	0	0	0	0.108	0.474	0	0.394	0.691
BOD1L1	SKA3	9606.ENSP00000040738	9606.ENSP00000319417	0	0	0	0	0	0	0.54	0.043	0.54
BOD1L1	MDC1	9606.ENSP00000040738	9606.ENSP00000365588	0	0	0	0	0.047	0.459	0	0.183	0.542
BRCA1	RAD51AP1	9606.ENSP00000418960	9606.ENSP00000228843	0	0	0	0	0.368	0	0.6	0.459	0.851
BRCA1	RIF1	9606.ENSP00000418960	9606.ENSP00000243326	0	0	0	0	0.092	0.405	0.65	0.298	0.849
BRCA1	LIG1	9606.ENSP00000418960	9606.ENSP00000263274	0	0	0	0	0.147	0	0	0.454	0.515
BRCA1	MCM2	9606.ENSP00000418960	9606.ENSP00000265056	0	0	0	0	0.327	0	0	0.406	0.583
BRCA1	ANLN	9606.ENSP00000418960	9606.ENSP00000265748	0	0	0	0	0.3	0.391	0	0.143	0.603
BRCA1	BIN2	9606.ENSP00000418960	9606.ENSP00000267012	0	0	0	0	0	0	0	0.449	0.449
BRCA1	TPX2	9606.ENSP00000418960	9606.ENSP00000300403	0	0	0	0	0.411	0.682	0	0.514	0.901
BRCA1	KMT2D	9606.ENSP00000418960	9606.ENSP00000301067	0	0	0	0	0.051	0.056	0	0.419	0.434
BRCA1	CLSPN	9606.ENSP00000418960	9606.ENSP00000312995	0	0	0	0	0.341	0.487	0.6	0.683	0.951
BRCA1	HNRNPD	9606.ENSP00000418960	9606.ENSP00000313199	0	0	0	0	0.062	0.44	0	0.18	0.531
BRCA1	RNF168	9606.ENSP00000418960	9606.ENSP00000320898	0	0	0	0	0.082	0.647	0.6	0.837	0.976
BRCA1	CDCA2	9606.ENSP00000418960	9606.ENSP00000328228	0	0	0	0	0.301	0.128	0	0.096	0.401
BRCA1	ERCC6L	9606.ENSP00000418960	9606.ENSP00000334675	0	0	0	0	0.287	0.056	0	0.28	0.474
BRCA1	THRAP3	9606.ENSP00000418960	9606.ENSP00000346634	0	0	0	0	0.062	0	0	0.477	0.488
BRCA1	HNRNPAB	9606.ENSP00000418960	9606.ENSP00000351108	0	0	0	0	0.08	0.405	0	0	0.429
BRCA1	RRM2	9606.ENSP00000418960	9606.ENSP00000353770	0	0	0	0	0.409	0	0	0.525	0.708
BRCA1	ZEB1	9606.ENSP00000418960	9606.ENSP00000354487	0	0	0	0	0	0	0	0.404	0.404
BRCA1	MKI67	9606.ENSP00000418960	9606.ENSP00000357643	0	0	0	0	0.389	0.128	0	0.422	0.665
BRCA1	ATRX	9606.ENSP00000418960	9606.ENSP00000362441	0	0	0	0	0.062	0.056	0	0.771	0.78
BRCA1	MDC1	9606.ENSP00000418960	9606.ENSP00000365588	0	0	0	0	0.062	0.873	0.9	0.935	0.999
BRCA1	LSP1	9606.ENSP00000418960	9606.ENSP00000371194	0	0	0	0	0	0	0	0.49	0.489
BRCA1	SUMO1	9606.ENSP00000418960	9606.ENSP00000376077	0	0	0	0	0.062	0.661	0.8	0.547	0.967
BRCA1	FOXO3	9606.ENSP00000418960	9606.ENSP00000385824	0	0	0	0	0	0.27	0	0.455	0.585
BRCA1	TOP2A	9606.ENSP00000418960	9606.ENSP00000411532	0	0	0	0	0.676	0.383	0	0.567	0.906
BRCA1	MCM10	9606.ENSP00000418960	9606.ENSP00000418268	0	0	0	0	0.567	0.459	0	0.324	0.827
BRCA1	NUSAP1	9606.ENSP00000418960	9606.ENSP00000453403	0	0	0	0	0.408	0	0	0.234	0.527
BRCA1	RNF4	9606.ENSP00000418960	9606.ENSP00000426503	0	0	0	0	0	0	0.9	0.469	0.944
BRCA1	BCLAF1	9606.ENSP00000418960	9606.ENSP00000435210	0	0	0	0	0.062	0	0	0.973	0.973
BRD8	DNTTIP2	9606.ENSP00000254900	9606.ENSP00000411010	0	0	0	0	0.064	0	0	0.421	0.434
BRD8	PRRC2B	9606.ENSP00000254900	9606.ENSP00000349856	0	0	0	0	0.064	0	0	0.44	0.454
BTF3	NUFIP2	9606.ENSP00000369965	9606.ENSP00000225388	0	0	0	0	0.087	0	0.54	0	0.562
BTF3	ABCF1	9606.ENSP00000369965	9606.ENSP00000313603	0	0	0	0	0.11	0	0.54	0.043	0.574
BTF3	RPLP2	9606.ENSP00000369965	9606.ENSP00000322419	0	0	0	0	0.595	0.567	0	0.101	0.828
BTF3	SERBP1	9606.ENSP00000369965	9606.ENSP00000360034	0	0	0	0	0.372	0.213	0	0	0.485
BTF3	YBX1	9606.ENSP00000369965	9606.ENSP00000361626	0	0	0	0	0.47	0.248	0	0.111	0.615
BTF3	LARP4B	9606.ENSP00000369965	9606.ENSP00000482767	0	0	0	0	0.087	0	0.54	0	0.562
BTF3	EEF1B2	9606.ENSP00000369965	9606.ENSP00000376056	0	0	0	0	0.62	0.247	0	0.184	0.746
BTF3	NACA	9606.ENSP00000369965	9606.ENSP00000448035	0	0	0	0	0.737	0.987	0.54	0.466	0.999
C11orf58	PTMA	9606.ENSP00000228136	9606.ENSP00000344547	0	0	0	0	0.157	0.272	0	0.522	0.681
C17orf49	TAF7	9606.ENSP00000448598	9606.ENSP00000312709	0	0	0	0	0	0	0.9	0	0.9
C17orf85	THOC2	9606.ENSP00000373657	9606.ENSP00000245838	0	0	0	0	0.145	0.673	0	0.54	0.86
C17orf85	WBP11	9606.ENSP00000373657	9606.ENSP00000261167	0	0	0	0	0.113	0	0	0.619	0.648
C17orf85	ACIN1	9606.ENSP00000373657	9606.ENSP00000262710	0	0	0	0	0.17	0.477	0	0.154	0.6
C17orf85	PHAX	9606.ENSP00000373657	9606.ENSP00000297540	0	0	0	0	0.107	0.27	0	0.564	0.691
C17orf85	ZC3H11A	9606.ENSP00000373657	9606.ENSP00000438527	0	0	0	0	0.109	0.679	0	0	0.701
C17orf85	SRRT	9606.ENSP00000373657	9606.ENSP00000480421	0	0	0	0	0.142	0.477	0	0.727	0.867
CAPRIN1	NUFIP2	9606.ENSP00000340329	9606.ENSP00000225388	0	0	0	0	0.085	0.402	0	0.396	0.641
CAPRIN1	RBM3	9606.ENSP00000340329	9606.ENSP00000365950	0	0	0	0	0.112	0.322	0	0.097	0.409
CAPRIN1	PRRC2C	9606.ENSP00000340329	9606.ENSP00000343629	0	0	0	0	0.111	0.367	0	0	0.413
CAPRIN1	EIF4B	9606.ENSP00000340329	9606.ENSP00000388806	0	0	0	0	0.141	0.108	0	0.299	0.416
CAPRIN1	LARP4B	9606.ENSP00000340329	9606.ENSP00000482767	0	0	0	0	0.061	0.419	0	0.048	0.435
CAPRIN1	UBAP2L	9606.ENSP00000340329	9606.ENSP00000389445	0	0	0	0	0.239	0.242	0	0.417	0.634
CAPRIN1	ATXN2	9606.ENSP00000340329	9606.ENSP00000366843	0	0	0	0	0.064	0.284	0	0.543	0.668
CAPRIN1	YBX1	9606.ENSP00000340329	9606.ENSP00000361626	0	0	0	0	0.215	0.27	0	0.492	0.684
CASC3	SRSF9	9606.ENSP00000264645	9606.ENSP00000229390	0	0	0	0	0.056	0.7	0.6	0.368	0.918
CASC3	THOC2	9606.ENSP00000264645	9606.ENSP00000245838	0	0	0	0	0.062	0	0.6	0.064	0.618
CASC3	PPIG	9606.ENSP00000264645	9606.ENSP00000260970	0	0	0	0	0	0.8	0	0.043	0.8
CASC3	ACIN1	9606.ENSP00000264645	9606.ENSP00000262710	0	0	0	0	0.065	0	0	0.456	0.47
CASC3	THRAP3	9606.ENSP00000264645	9606.ENSP00000346634	0	0	0	0	0.065	0.27	0	0.301	0.481
CASC3	ZRANB2	9606.ENSP00000264645	9606.ENSP00000359958	0	0	0	0	0	0	0	0.508	0.508
CASC3	ATXN2	9606.ENSP00000264645	9606.ENSP00000366843	0	0	0	0	0	0.411	0	0.205	0.512
CASC3	NUP35	9606.ENSP00000264645	9606.ENSP00000295119	0	0	0	0	0	0	0.6	0	0.6
CASC3	FIP1L1	9606.ENSP00000264645	9606.ENSP00000336752	0	0	0	0	0	0	0.6	0	0.6
CASC3	TPR	9606.ENSP00000264645	9606.ENSP00000356448	0	0	0	0	0.082	0	0.6	0	0.617
CASC3	SRSF5	9606.ENSP00000264645	9606.ENSP00000452123	0	0	0	0	0.062	0.185	0.6	0.101	0.688
CASC3	SRSF2	9606.ENSP00000264645	9606.ENSP00000376276	0	0	0	0	0.063	0	0.6	0.329	0.726
CASC3	ZC3H11A	9606.ENSP00000264645	9606.ENSP00000438527	0	0	0	0	0	0	0.6	0.452	0.771
CASC3	SRRM1	9606.ENSP00000264645	9606.ENSP00000326261	0	0	0	0	0.064	0	0.6	0.531	0.809
CASC3	SRRM2	9606.ENSP00000264645	9606.ENSP00000301740	0	0	0	0	0.065	0.8	0	0.367	0.871
CASC3	CWC25	9606.ENSP00000264645	9606.ENSP00000478070	0	0	0	0	0	0.8	0.9	0.055	0.979
CAST	SF1	9606.ENSP00000379157	9606.ENSP00000366604	0	0	0	0	0	0	0	0.439	0.439
CAST	LSP1	9606.ENSP00000379157	9606.ENSP00000371194	0	0	0	0	0	0	0	0.539	0.539
CCDC12	SDE2	9606.ENSP00000292314	9606.ENSP00000272091	0	0	0	0	0	0.582	0	0	0.582
CCDC12	SRRM1	9606.ENSP00000292314	9606.ENSP00000326261	0	0	0	0	0.065	0	0	0.422	0.436
CCDC86	YBX3	9606.ENSP00000227520	9606.ENSP00000228251	0	0	0	0	0	0	0	0.406	0.406
CCDC86	PRRC2A	9606.ENSP00000227520	9606.ENSP00000365201	0	0	0	0	0.064	0	0	0.535	0.546
CCDC86	TCOF1	9606.ENSP00000227520	9606.ENSP00000367028	0	0	0	0	0.131	0	0	0.622	0.658
CDCA2	RAD51AP1	9606.ENSP00000328228	9606.ENSP00000228843	0	0	0	0	0.561	0	0	0.203	0.635
CDCA2	MCM2	9606.ENSP00000328228	9606.ENSP00000265056	0	0	0	0	0.383	0	0	0.205	0.489
CDCA2	ANLN	9606.ENSP00000328228	9606.ENSP00000265748	0	0	0	0	0.568	0	0	0.345	0.705
CDCA2	TICRR	9606.ENSP00000328228	9606.ENSP00000268138	0	0	0	0	0.554	0	0	0.159	0.609
CDCA2	TPX2	9606.ENSP00000328228	9606.ENSP00000300403	0	0	0	0	0.594	0	0	0.216	0.668
CDCA2	CLSPN	9606.ENSP00000328228	9606.ENSP00000312995	0	0	0	0	0.467	0	0	0.17	0.539
CDCA2	SKA3	9606.ENSP00000328228	9606.ENSP00000319417	0	0	0	0	0.594	0	0	0.422	0.756
CDCA2	BRCA1	9606.ENSP00000328228	9606.ENSP00000418960	0	0	0	0	0.301	0.128	0	0.096	0.401
CDCA2	ERCC6L	9606.ENSP00000328228	9606.ENSP00000334675	0	0	0	0	0.384	0	0	0.096	0.42
CDCA2	AHCTF1	9606.ENSP00000328228	9606.ENSP00000355465	0	0	0	0	0.069	0	0	0.482	0.497
CDCA2	INCENP	9606.ENSP00000328228	9606.ENSP00000378295	0	0	0	0	0.331	0	0	0.436	0.607
CDCA2	RRM2	9606.ENSP00000328228	9606.ENSP00000353770	0	0	0	0	0.592	0	0	0.112	0.622
CDCA2	MKI67	9606.ENSP00000328228	9606.ENSP00000357643	0	0	0	0.541	0.61	0	0	0.255	0.65
CDCA2	MCM10	9606.ENSP00000328228	9606.ENSP00000418268	0	0	0	0	0.55	0	0	0.39	0.714
CDCA2	TOP2A	9606.ENSP00000328228	9606.ENSP00000411532	0	0	0	0	0.652	0	0	0.266	0.734
CDCA2	NUSAP1	9606.ENSP00000328228	9606.ENSP00000453403	0	0	0	0	0.702	0	0	0.403	0.814
CDCA2	CDCA3	9606.ENSP00000328228	9606.ENSP00000442068	0	0	0	0	0.557	0	0	0.609	0.819
CDCA3	RAD51AP1	9606.ENSP00000442068	9606.ENSP00000228843	0	0	0	0	0.34	0	0	0.292	0.513
CDCA3	ANLN	9606.ENSP00000442068	9606.ENSP00000265748	0	0	0	0	0.243	0	0	0.37	0.503
CDCA3	TPX2	9606.ENSP00000442068	9606.ENSP00000300403	0	0	0	0	0.871	0	0	0.345	0.912
CDCA3	SKA3	9606.ENSP00000442068	9606.ENSP00000319417	0	0	0	0	0.745	0	0	0.113	0.764
CDCA3	CDCA2	9606.ENSP00000442068	9606.ENSP00000328228	0	0	0	0	0.557	0	0	0.609	0.819
CDCA3	RRM2	9606.ENSP00000442068	9606.ENSP00000353770	0	0	0	0	0.861	0	0	0.282	0.896
CDCA3	MKI67	9606.ENSP00000442068	9606.ENSP00000357643	0	0	0	0	0.728	0	0	0.364	0.82
CDCA3	INCENP	9606.ENSP00000442068	9606.ENSP00000378295	0	0	0	0	0.655	0	0	0.082	0.67
CDCA3	TOP2B	9606.ENSP00000442068	9606.ENSP00000396704	0	0	0	0	0.456	0	0	0.099	0.488
CDCA3	TOP2A	9606.ENSP00000442068	9606.ENSP00000411532	0	0	0	0	0.943	0	0	0.464	0.968
CDCA3	MCM10	9606.ENSP00000442068	9606.ENSP00000418268	0	0	0	0	0.224	0	0	0.378	0.496
CDCA3	NUSAP1	9606.ENSP00000442068	9606.ENSP00000453403	0	0	0	0	0.883	0	0	0.511	0.94
CDK13	SPEN	9606.ENSP00000181839	9606.ENSP00000364912	0	0	0	0	0.065	0.369	0	0.101	0.423
CDK13	THOC2	9606.ENSP00000181839	9606.ENSP00000245838	0	0	0	0	0.123	0.346	0	0.14	0.463
CDK13	KMT2D	9606.ENSP00000181839	9606.ENSP00000301067	0	0	0	0	0.063	0.15	0	0.382	0.465
CDK13	HEXIM1	9606.ENSP00000181839	9606.ENSP00000328773	0	0	0	0	0.105	0.27	0	0.295	0.499
CENPC	RNF4	9606.ENSP00000273853	9606.ENSP00000426503	0	0	0	0	0	0.27	0	0.22	0.406
CENPC	SKA3	9606.ENSP00000273853	9606.ENSP00000319417	0	0	0	0	0.122	0	0	0.373	0.426
CENPC	SON	9606.ENSP00000273853	9606.ENSP00000348984	0	0	0	0	0.059	0.182	0	0.411	0.507
CENPC	INCENP	9606.ENSP00000273853	9606.ENSP00000378295	0	0	0	0	0.065	0.161	0	0.717	0.758
CEP85	ANKRD17	9606.ENSP00000252992	9606.ENSP00000351416	0	0	0	0	0	0.406	0	0	0.406
CEP85	APC	9606.ENSP00000252992	9606.ENSP00000257430	0	0	0	0	0	0.409	0	0	0.408
CEP85	TNKS1BP1	9606.ENSP00000252992	9606.ENSP00000437271	0	0	0	0	0	0.413	0	0	0.412
CEP85	UBAP2L	9606.ENSP00000252992	9606.ENSP00000389445	0	0	0	0	0	0.249	0	0.28	0.436
CFDP1	SMNDC1	9606.ENSP00000283882	9606.ENSP00000358616	0	0	0	0	0.761	0	0	0	0.761
CLSPN	RAD51AP1	9606.ENSP00000312995	9606.ENSP00000228843	0	0	0	0	0.451	0	0	0.19	0.536
CLSPN	LIG1	9606.ENSP00000312995	9606.ENSP00000263274	0	0	0	0	0.398	0	0	0.343	0.588
CLSPN	MCM2	9606.ENSP00000312995	9606.ENSP00000265056	0	0	0	0	0.576	0	0.6	0.714	0.947
CLSPN	TICRR	9606.ENSP00000312995	9606.ENSP00000268138	0	0	0	0	0.279	0	0	0.506	0.628
CLSPN	TPX2	9606.ENSP00000312995	9606.ENSP00000300403	0	0	0	0	0.424	0	0	0.243	0.545
CLSPN	MAP2	9606.ENSP00000312995	9606.ENSP00000353508	0	0	0	0	0	0	0	0.445	0.445
CLSPN	ERCC6L	9606.ENSP00000312995	9606.ENSP00000334675	0	0	0	0	0.326	0.132	0	0.213	0.499
CLSPN	NUSAP1	9606.ENSP00000312995	9606.ENSP00000453403	0	0	0	0	0.386	0	0	0.22	0.501
CLSPN	RNF168	9606.ENSP00000312995	9606.ENSP00000320898	0	0	0	0	0.085	0	0	0.478	0.503
CLSPN	CDCA2	9606.ENSP00000312995	9606.ENSP00000328228	0	0	0	0	0.467	0	0	0.17	0.539
CLSPN	RRM2	9606.ENSP00000312995	9606.ENSP00000353770	0	0	0	0	0.441	0	0	0.294	0.589
CLSPN	MDC1	9606.ENSP00000312995	9606.ENSP00000365588	0	0	0	0	0.082	0	0	0.621	0.638
CLSPN	MKI67	9606.ENSP00000312995	9606.ENSP00000357643	0	0	0	0	0.659	0	0	0.083	0.674
CLSPN	TOP2A	9606.ENSP00000312995	9606.ENSP00000411532	0	0	0	0	0.759	0	0	0.449	0.862
CLSPN	BRCA1	9606.ENSP00000312995	9606.ENSP00000418960	0	0	0	0	0.341	0.487	0.6	0.683	0.951
CLSPN	MCM10	9606.ENSP00000312995	9606.ENSP00000418268	0	0	0	0	0.628	0	0.6	0.719	0.954
CPEB4	EIF4ENIF1	9606.ENSP00000265085	9606.ENSP00000380659	0	0	0	0	0.064	0.338	0	0.377	0.58
CPEB4	YBX1	9606.ENSP00000265085	9606.ENSP00000361626	0	0	0	0	0.062	0.149	0.54	0.076	0.615
CWC25	SNRPC	9606.ENSP00000478070	9606.ENSP00000244520	0	0	0	0	0	0.056	0	0.521	0.529
CWC25	PPIG	9606.ENSP00000478070	9606.ENSP00000260970	0	0	0	0	0.085	0.8	0	0.087	0.818
CWC25	CASC3	9606.ENSP00000478070	9606.ENSP00000264645	0	0	0	0	0	0.8	0.9	0.055	0.979
CWC25	SDE2	9606.ENSP00000478070	9606.ENSP00000272091	0	0	0	0	0.077	0.59	0	0.666	0.862
CWC25	SRRM2	9606.ENSP00000478070	9606.ENSP00000301740	0	0	0	0	0.084	0.868	0	0.734	0.965
CWC25	SRRM1	9606.ENSP00000478070	9606.ENSP00000326261	0	0	0	0	0.138	0	0	0.375	0.438
CWC25	MYB	9606.ENSP00000478070	9606.ENSP00000339992	0	0	0	0	0.066	0.369	0	0.144	0.451
CWC25	SF1	9606.ENSP00000478070	9606.ENSP00000366604	0	0	0	0	0.064	0.057	0	0.387	0.411
CXCR4	SPN	9606.ENSP00000386884	9606.ENSP00000353238	0	0	0	0	0.091	0	0	0.458	0.487
CXCR4	ZEB1	9606.ENSP00000386884	9606.ENSP00000354487	0	0	0	0	0	0	0	0.422	0.422
CXCR4	MKI67	9606.ENSP00000386884	9606.ENSP00000357643	0	0	0	0	0.062	0	0	0.39	0.404
CXCR4	PSIP1	9606.ENSP00000386884	9606.ENSP00000370109	0	0	0	0	0	0.209	0	0.345	0.459
DDX21	GLTSCR2	9606.ENSP00000346120	9606.ENSP00000246802	0	0	0	0	0.839	0.059	0	0.093	0.85
DDX21	ZC3H13	9606.ENSP00000346120	9606.ENSP00000282007	0	0	0	0	0.382	0.213	0	0.101	0.525
DDX21	HEXIM1	9606.ENSP00000346120	9606.ENSP00000328773	0	0	0	0	0.087	0.486	0	0.403	0.695
DDX21	SERBP1	9606.ENSP00000346120	9606.ENSP00000360034	0	0	0	0	0.261	0.164	0	0.137	0.421
DDX21	TOP2A	9606.ENSP00000346120	9606.ENSP00000411532	0.042	0	0	0	0.158	0.281	0	0.17	0.455
DDX21	GPATCH4	9606.ENSP00000346120	9606.ENSP00000396441	0	0	0	0	0.29	0.246	0	0.072	0.46
DDX21	RRP15	9606.ENSP00000346120	9606.ENSP00000355899	0	0	0	0	0.361	0.16	0	0.101	0.475
DDX21	NOP14	9606.ENSP00000346120	9606.ENSP00000405068	0	0	0	0	0.512	0.153	0	0.148	0.617
DDX21	DKC1	9606.ENSP00000346120	9606.ENSP00000358563	0.051	0	0	0	0.302	0.406	0	0.243	0.663
DDX21	YBX1	9606.ENSP00000346120	9606.ENSP00000361626	0.046	0	0	0	0.122	0.551	0	0.249	0.68
DDX21	FTSJ3	9606.ENSP00000346120	9606.ENSP00000396673	0	0	0	0	0.52	0.351	0	0.108	0.698
DDX21	SRSF2	9606.ENSP00000346120	9606.ENSP00000376276	0	0	0	0	0.312	0	0	0.609	0.719
DDX21	NOLC1	9606.ENSP00000346120	9606.ENSP00000385410	0	0	0	0	0.611	0.086	0	0.287	0.724
DDX21	GNL3	9606.ENSP00000346120	9606.ENSP00000395772	0	0	0	0	0.559	0.165	0.8	0.356	0.946
DKC1	GLTSCR2	9606.ENSP00000358563	9606.ENSP00000246802	0	0	0	0	0.518	0.769	0	0.365	0.923
DKC1	PSME3	9606.ENSP00000358563	9606.ENSP00000293362	0	0	0	0	0.823	0	0	0	0.823
DKC1	PHAX	9606.ENSP00000358563	9606.ENSP00000297540	0	0	0	0	0.069	0	0	0.536	0.549
DKC1	RPLP2	9606.ENSP00000358563	9606.ENSP00000322419	0	0	0	0	0.184	0.252	0	0.107	0.407
DKC1	LARP1	9606.ENSP00000358563	9606.ENSP00000336721	0	0	0	0	0.196	0.274	0	0.063	0.405
DKC1	DDX21	9606.ENSP00000358563	9606.ENSP00000346120	0.051	0	0	0	0.302	0.406	0	0.243	0.663
DKC1	RRP15	9606.ENSP00000358563	9606.ENSP00000355899	0	0	0	0	0.674	0	0	0.044	0.675
DKC1	SERBP1	9606.ENSP00000358563	9606.ENSP00000360034	0	0	0	0	0.238	0.27	0	0	0.42
DKC1	TOP2B	9606.ENSP00000358563	9606.ENSP00000396704	0.12	0	0	0	0.065	0.346	0	0.097	0.449
DKC1	TOP2A	9606.ENSP00000358563	9606.ENSP00000411532	0.12	0	0	0	0.16	0.346	0	0.119	0.517
DKC1	TCOF1	9606.ENSP00000358563	9606.ENSP00000367028	0	0	0	0	0.135	0.27	0	0.453	0.624
DKC1	DNTTIP2	9606.ENSP00000358563	9606.ENSP00000411010	0	0	0	0	0.656	0	0	0	0.656
DKC1	NOL7	9606.ENSP00000358563	9606.ENSP00000405674	0	0	0	0	0.765	0	0	0	0.765
DKC1	NOP14	9606.ENSP00000358563	9606.ENSP00000405068	0	0	0	0	0.819	0	0	0.167	0.843
DKC1	EIF4B	9606.ENSP00000358563	9606.ENSP00000388806	0	0	0	0	0.828	0.092	0	0.119	0.851
DKC1	FTSJ3	9606.ENSP00000358563	9606.ENSP00000396673	0.074	0	0	0	0.861	0.358	0	0.254	0.93
DKC1	GNL3	9606.ENSP00000358563	9606.ENSP00000395772	0	0	0	0	0.913	0.817	0	0.231	0.986
DKC1	NOLC1	9606.ENSP00000358563	9606.ENSP00000385410	0	0	0	0	0.862	0.6	0.36	0.944	0.997
DMTN	ADD2	9606.ENSP00000427866	9606.ENSP00000264436	0	0	0	0	0.065	0.394	0.6	0.817	0.952
DMTN	ADD1	9606.ENSP00000427866	9606.ENSP00000264758	0	0	0	0	0.083	0.246	0.6	0.607	0.876
DMTN	ANK1	9606.ENSP00000427866	9606.ENSP00000265709	0	0	0	0	0.117	0	0	0.507	0.546
DMTN	AHSP	9606.ENSP00000427866	9606.ENSP00000307199	0	0	0	0	0.318	0	0	0.468	0.621
DMTN	GYPA	9606.ENSP00000427866	9606.ENSP00000354003	0	0	0	0	0.062	0	0	0.425	0.437
DNTTIP2	GLTSCR2	9606.ENSP00000411010	9606.ENSP00000246802	0	0	0	0	0.81	0	0	0.151	0.832
DNTTIP2	BRD8	9606.ENSP00000411010	9606.ENSP00000254900	0	0	0	0	0.064	0	0	0.421	0.434
DNTTIP2	PSME3	9606.ENSP00000411010	9606.ENSP00000293362	0	0	0	0	0.48	0	0	0	0.48
DNTTIP2	RRP15	9606.ENSP00000411010	9606.ENSP00000355899	0	0	0	0	0.857	0	0	0	0.857
DNTTIP2	DKC1	9606.ENSP00000411010	9606.ENSP00000358563	0	0	0	0	0.656	0	0	0	0.656
DNTTIP2	GNL3	9606.ENSP00000411010	9606.ENSP00000395772	0	0	0	0	0.515	0	0	0	0.515
DNTTIP2	FTSJ3	9606.ENSP00000411010	9606.ENSP00000396673	0	0	0	0	0.658	0	0	0	0.658
DNTTIP2	NOP14	9606.ENSP00000411010	9606.ENSP00000405068	0	0	0	0	0.45	0.798	0	0.451	0.933
EAF1	MED26	9606.ENSP00000380054	9606.ENSP00000263390	0	0	0	0	0	0.289	0	0.435	0.582
EAF1	PSME3	9606.ENSP00000380054	9606.ENSP00000293362	0	0	0	0	0	0.457	0	0	0.457
EAF1	GTF2F1	9606.ENSP00000380054	9606.ENSP00000377969	0	0	0	0	0.063	0.227	0.6	0	0.684
EAF1	TCEA1	9606.ENSP00000380054	9606.ENSP00000428426	0	0	0	0	0.062	0.113	0.8	0.226	0.854
EEF1B2	SRSF9	9606.ENSP00000376056	9606.ENSP00000229390	0	0	0	0	0.148	0.271	0	0.113	0.401
EEF1B2	GLTSCR2	9606.ENSP00000376056	9606.ENSP00000246802	0	0	0	0	0.163	0	0	0.322	0.409
EEF1B2	RPLP2	9606.ENSP00000376056	9606.ENSP00000322419	0.045	0	0	0	0.95	0.895	0	0.412	0.996
EEF1B2	BTF3	9606.ENSP00000376056	9606.ENSP00000369965	0	0	0	0	0.62	0.247	0	0.184	0.746
EEF1B2	GTF2F1	9606.ENSP00000376056	9606.ENSP00000377969	0	0	0	0	0	0.613	0	0	0.613
EEF1B2	NACA	9606.ENSP00000376056	9606.ENSP00000448035	0	0	0	0	0.654	0.056	0	0.415	0.792
EIF4B	LARP1	9606.ENSP00000388806	9606.ENSP00000336721	0	0	0	0	0.115	0.057	0	0.52	0.565
EIF4B	CAPRIN1	9606.ENSP00000388806	9606.ENSP00000340329	0	0	0	0	0.141	0.108	0	0.299	0.416
EIF4B	EIF4EBP1	9606.ENSP00000388806	9606.ENSP00000340691	0	0	0	0	0.062	0	0	0.762	0.768
EIF4B	DKC1	9606.ENSP00000388806	9606.ENSP00000358563	0	0	0	0	0.828	0.092	0	0.119	0.851
EIF4B	SF1	9606.ENSP00000388806	9606.ENSP00000366604	0	0	0	0	0.102	0.452	0	0.11	0.524
EIF4B	SRSF5	9606.ENSP00000388806	9606.ENSP00000452123	0	0	0	0	0.226	0.213	0	0.111	0.411
EIF4B	NOP14	9606.ENSP00000388806	9606.ENSP00000405068	0	0	0	0	0.458	0	0	0.067	0.472
EIF4B	GNL3	9606.ENSP00000388806	9606.ENSP00000395772	0	0	0	0	0.701	0	0	0.079	0.712
EIF4B	TNKS1BP1	9606.ENSP00000388806	9606.ENSP00000437271	0	0	0	0	0	0	0.9	0	0.9
EIF4EBP1	MKI67	9606.ENSP00000340691	9606.ENSP00000357643	0	0	0	0	0.098	0	0	0.4	0.435
EIF4EBP1	IRS2	9606.ENSP00000340691	9606.ENSP00000365016	0	0	0	0	0	0	0	0.468	0.468
EIF4EBP1	FOXO3	9606.ENSP00000340691	9606.ENSP00000385824	0	0	0	0	0	0.06	0	0.626	0.634
EIF4EBP1	EIF4B	9606.ENSP00000340691	9606.ENSP00000388806	0	0	0	0	0.062	0	0	0.762	0.768
EIF4ENIF1	CPEB4	9606.ENSP00000380659	9606.ENSP00000265085	0	0	0	0	0.064	0.338	0	0.377	0.58
EIF4ENIF1	PATL1	9606.ENSP00000380659	9606.ENSP00000300146	0	0	0	0	0.096	0.258	0	0.759	0.824
EIF4ENIF1	LARP1	9606.ENSP00000380659	9606.ENSP00000336721	0	0	0	0	0.062	0	0	0.434	0.446
EIF4ENIF1	ATXN2	9606.ENSP00000380659	9606.ENSP00000366843	0	0	0	0	0.062	0.206	0	0.29	0.425
EIF4ENIF1	PDLIM5	9606.ENSP00000380659	9606.ENSP00000480359	0	0	0	0	0	0	0	0.456	0.456
EPS15	BIN2	9606.ENSP00000360798	9606.ENSP00000267012	0	0	0	0	0.064	0.246	0.9	0.251	0.94
EPS15	BIN1	9606.ENSP00000360798	9606.ENSP00000316779	0	0	0	0	0.064	0.246	0.9	0.584	0.966
EPS15	BMP2K	9606.ENSP00000360798	9606.ENSP00000334836	0	0	0	0	0.108	0.474	0	0.394	0.691
EPS15	BDP1	9606.ENSP00000360798	9606.ENSP00000351575	0	0	0	0	0.089	0	0	0.472	0.498
EPS15	RAD23A	9606.ENSP00000360798	9606.ENSP00000467024	0	0	0	0	0.049	0.4	0	0.26	0.541
EPS15	SYNJ1	9606.ENSP00000360798	9606.ENSP00000409667	0	0	0	0	0.065	0.378	0.9	0.755	0.983
ERCC6L	RAD51AP1	9606.ENSP00000334675	9606.ENSP00000228843	0	0	0	0	0.55	0	0	0.108	0.581
ERCC6L	MCM2	9606.ENSP00000334675	9606.ENSP00000265056	0	0	0	0	0.325	0.149	0	0.184	0.491
ERCC6L	ANLN	9606.ENSP00000334675	9606.ENSP00000265748	0	0	0	0	0.561	0	0	0.155	0.613
ERCC6L	TPX2	9606.ENSP00000334675	9606.ENSP00000300403	0	0	0	0	0.588	0	0	0.241	0.674
ERCC6L	CLSPN	9606.ENSP00000334675	9606.ENSP00000312995	0	0	0	0	0.326	0.132	0	0.213	0.499
ERCC6L	SKA3	9606.ENSP00000334675	9606.ENSP00000319417	0	0	0	0	0.501	0	0	0.14	0.552
ERCC6L	CDCA2	9606.ENSP00000334675	9606.ENSP00000328228	0	0	0	0	0.384	0	0	0.096	0.42
ERCC6L	TOP2B	9606.ENSP00000334675	9606.ENSP00000396704	0	0	0	0	0.102	0.164	0	0.274	0.407
ERCC6L	RAD23A	9606.ENSP00000334675	9606.ENSP00000467024	0	0	0	0	0	0.203	0	0.293	0.412
ERCC6L	MDC1	9606.ENSP00000334675	9606.ENSP00000365588	0	0	0	0	0.109	0.164	0	0.316	0.446
ERCC6L	BRCA1	9606.ENSP00000334675	9606.ENSP00000418960	0	0	0	0	0.287	0.056	0	0.28	0.474
ERCC6L	INCENP	9606.ENSP00000334675	9606.ENSP00000378295	0	0	0	0	0.24	0	0	0.392	0.518
ERCC6L	SFSWAP	9606.ENSP00000334675	9606.ENSP00000437738	0	0	0	0	0.049	0	0	0.539	0.542
ERCC6L	RRM2	9606.ENSP00000334675	9606.ENSP00000353770	0	0	0	0	0.552	0.056	0	0.125	0.598
ERCC6L	MKI67	9606.ENSP00000334675	9606.ENSP00000357643	0	0	0	0	0.568	0	0	0.112	0.6
ERCC6L	NUSAP1	9606.ENSP00000334675	9606.ENSP00000453403	0	0	0	0	0.562	0	0	0.262	0.663
ERCC6L	TOP2A	9606.ENSP00000334675	9606.ENSP00000411532	0	0	0	0	0.583	0.166	0	0.543	0.827
ERCC6L	MCM10	9606.ENSP00000334675	9606.ENSP00000418268	0	0	0	0	0.782	0.06	0	0.293	0.842
FIP1L1	SRSF9	9606.ENSP00000336752	9606.ENSP00000229390	0	0	0	0	0.145	0.338	0.6	0.135	0.777
FIP1L1	THOC2	9606.ENSP00000336752	9606.ENSP00000245838	0	0	0	0	0.201	0.115	0.6	0.153	0.728
FIP1L1	ZC3H4	9606.ENSP00000336752	9606.ENSP00000253048	0	0	0	0	0.075	0.608	0	0.377	0.754
FIP1L1	CASC3	9606.ENSP00000336752	9606.ENSP00000264645	0	0	0	0	0	0	0.6	0	0.6
FIP1L1	NUP35	9606.ENSP00000336752	9606.ENSP00000295119	0	0	0	0	0.146	0	0.9	0	0.911
FIP1L1	SRRM1	9606.ENSP00000336752	9606.ENSP00000326261	0	0	0	0	0.118	0	0.6	0	0.632
FIP1L1	ZC3H18	9606.ENSP00000336752	9606.ENSP00000416951	0	0	0	0	0.047	0.46	0	0	0.463
FIP1L1	BCOR	9606.ENSP00000336752	9606.ENSP00000367705	0	0	0	0	0	0	0	0.514	0.514
FIP1L1	ZC3H11A	9606.ENSP00000336752	9606.ENSP00000438527	0	0	0	0	0.105	0	0.6	0	0.627
FIP1L1	SRSF2	9606.ENSP00000336752	9606.ENSP00000376276	0	0	0	0	0.092	0	0.6	0.273	0.713
FIP1L1	SRSF5	9606.ENSP00000336752	9606.ENSP00000452123	0	0	0	0	0.096	0.338	0.6	0.152	0.769
FIP1L1	TPR	9606.ENSP00000336752	9606.ENSP00000356448	0	0	0	0	0.219	0.152	0.9	0	0.927
FNBP4	ARGLU1	9606.ENSP00000263773	9606.ENSP00000383059	0	0	0	0	0.46	0	0	0	0.46
FNBP4	ZC3H18	9606.ENSP00000263773	9606.ENSP00000416951	0	0	0	0	0.306	0.41	0	0	0.573
FOXO3	TCF3	9606.ENSP00000385824	9606.ENSP00000262965	0	0	0	0	0.049	0.146	0	0.445	0.511
FOXO3	EIF4EBP1	9606.ENSP00000385824	9606.ENSP00000340691	0	0	0	0	0	0.06	0	0.626	0.634
FOXO3	ZEB1	9606.ENSP00000385824	9606.ENSP00000354487	0	0	0	0	0	0	0.9	0.342	0.931
FOXO3	IRS2	9606.ENSP00000385824	9606.ENSP00000365016	0	0	0	0	0.062	0.284	0	0.478	0.619
FOXO3	TOP2A	9606.ENSP00000385824	9606.ENSP00000411532	0	0	0	0	0.062	0	0	0.457	0.468
FOXO3	BRCA1	9606.ENSP00000385824	9606.ENSP00000418960	0	0	0	0	0	0.27	0	0.455	0.585
FOXO3	TNRC6B	9606.ENSP00000385824	9606.ENSP00000401946	0	0	0	0	0	0	0.9	0	0.9
FTSJ3	KNOP1	9606.ENSP00000396673	9606.ENSP00000219837	0	0	0	0	0	0.427	0	0	0.426
FTSJ3	GLTSCR2	9606.ENSP00000396673	9606.ENSP00000246802	0	0	0	0	0.879	0.833	0	0.412	0.987
FTSJ3	DDX21	9606.ENSP00000396673	9606.ENSP00000346120	0	0	0	0	0.52	0.351	0	0.108	0.698
FTSJ3	RRP15	9606.ENSP00000396673	9606.ENSP00000355899	0	0	0	0	0.855	0	0.54	0.251	0.946
FTSJ3	DKC1	9606.ENSP00000396673	9606.ENSP00000358563	0.074	0	0	0	0.861	0.358	0	0.254	0.93
FTSJ3	NOLC1	9606.ENSP00000396673	9606.ENSP00000385410	0	0	0	0	0.859	0	0	0.048	0.86
FTSJ3	GNL3	9606.ENSP00000396673	9606.ENSP00000395772	0	0	0	0	0.817	0.9	0	0.552	0.991
FTSJ3	GPATCH4	9606.ENSP00000396673	9606.ENSP00000396441	0	0	0	0	0.673	0.226	0	0	0.736
FTSJ3	DNTTIP2	9606.ENSP00000396673	9606.ENSP00000411010	0	0	0	0	0.658	0	0	0	0.658
FTSJ3	NOP14	9606.ENSP00000396673	9606.ENSP00000405068	0	0	0	0	0.887	0.369	0.9	0	0.992
GAB1	IRS2	9606.ENSP00000262995	9606.ENSP00000365016	0	0	0	0.546	0	0.153	0.5	0.294	0.611
GLTSCR2	EEF1B2	9606.ENSP00000246802	9606.ENSP00000376056	0	0	0	0	0.163	0	0	0.322	0.409
GLTSCR2	GPATCH4	9606.ENSP00000246802	9606.ENSP00000396441	0	0	0	0	0.652	0	0	0.063	0.66
GLTSCR2	NOLC1	9606.ENSP00000246802	9606.ENSP00000385410	0	0	0	0	0.51	0	0	0.561	0.776
GLTSCR2	DNTTIP2	9606.ENSP00000246802	9606.ENSP00000411010	0	0	0	0	0.81	0	0	0.151	0.832
GLTSCR2	DDX21	9606.ENSP00000246802	9606.ENSP00000346120	0	0	0	0	0.839	0.059	0	0.093	0.85
GLTSCR2	NOP14	9606.ENSP00000246802	9606.ENSP00000405068	0	0	0	0	0.872	0	0	0.105	0.881
GLTSCR2	RRP15	9606.ENSP00000246802	9606.ENSP00000355899	0	0	0	0	0.863	0	0	0.229	0.89
GLTSCR2	GNL3	9606.ENSP00000246802	9606.ENSP00000395772	0	0	0	0	0.639	0.632	0	0.432	0.918
GLTSCR2	DKC1	9606.ENSP00000246802	9606.ENSP00000358563	0	0	0	0	0.518	0.769	0	0.365	0.923
GLTSCR2	FTSJ3	9606.ENSP00000246802	9606.ENSP00000396673	0	0	0	0	0.879	0.833	0	0.412	0.987
GNL3	GLTSCR2	9606.ENSP00000395772	9606.ENSP00000246802	0	0	0	0	0.639	0.632	0	0.432	0.918
GNL3	PTMA	9606.ENSP00000395772	9606.ENSP00000344547	0	0	0	0	0.089	0	0	0.389	0.42
GNL3	DDX21	9606.ENSP00000395772	9606.ENSP00000346120	0	0	0	0	0.559	0.165	0.8	0.356	0.946
GNL3	RRP15	9606.ENSP00000395772	9606.ENSP00000355899	0	0	0	0	0.822	0	0	0.245	0.86
GNL3	DKC1	9606.ENSP00000395772	9606.ENSP00000358563	0	0	0	0	0.913	0.817	0	0.231	0.986
GNL3	NOLC1	9606.ENSP00000395772	9606.ENSP00000385410	0	0	0	0	0.824	0	0	0.506	0.909
GNL3	EIF4B	9606.ENSP00000395772	9606.ENSP00000388806	0	0	0	0	0.701	0	0	0.079	0.712
GNL3	UBAP2L	9606.ENSP00000395772	9606.ENSP00000389445	0	0	0	0	0.048	0	0	0.572	0.575
GNL3	GPATCH4	9606.ENSP00000395772	9606.ENSP00000396441	0	0	0	0	0.399	0.213	0	0.048	0.51
GNL3	DNTTIP2	9606.ENSP00000395772	9606.ENSP00000411010	0	0	0	0	0.515	0	0	0	0.515
GNL3	NOL7	9606.ENSP00000395772	9606.ENSP00000405674	0	0	0	0	0.495	0	0	0.326	0.645
GNL3	NOP14	9606.ENSP00000395772	9606.ENSP00000405068	0	0	0	0	0.816	0.386	0	0.101	0.889
GNL3	FTSJ3	9606.ENSP00000395772	9606.ENSP00000396673	0	0	0	0	0.817	0.9	0	0.552	0.991
GPATCH4	NUFIP2	9606.ENSP00000396441	9606.ENSP00000225388	0	0	0	0	0.046	0	0	0.618	0.62
GPATCH4	GLTSCR2	9606.ENSP00000396441	9606.ENSP00000246802	0	0	0	0	0.652	0	0	0.063	0.66
GPATCH4	DDX21	9606.ENSP00000396441	9606.ENSP00000346120	0	0	0	0	0.29	0.246	0	0.072	0.46
GPATCH4	AHCTF1	9606.ENSP00000396441	9606.ENSP00000355465	0	0	0	0	0.048	0	0	0.396	0.4
GPATCH4	RRP15	9606.ENSP00000396441	9606.ENSP00000355899	0	0	0	0	0.448	0.09	0	0	0.477
GPATCH4	PHACTR4	9606.ENSP00000396441	9606.ENSP00000362942	0	0	0	0	0	0	0	0.556	0.556
GPATCH4	NOLC1	9606.ENSP00000396441	9606.ENSP00000385410	0	0	0	0	0.363	0.258	0	0.14	0.558
GPATCH4	GNL3	9606.ENSP00000396441	9606.ENSP00000395772	0	0	0	0	0.399	0.213	0	0.048	0.51
GPATCH4	LARP4B	9606.ENSP00000396441	9606.ENSP00000482767	0	0	0	0	0.069	0	0	0.584	0.596
GPATCH4	NOP14	9606.ENSP00000396441	9606.ENSP00000405068	0	0	0	0	0.524	0.313	0	0	0.659
GPATCH4	FTSJ3	9606.ENSP00000396441	9606.ENSP00000396673	0	0	0	0	0.673	0.226	0	0	0.736
GPBP1	PSIP1	9606.ENSP00000264779	9606.ENSP00000370109	0	0	0	0	0.084	0	0	0.441	0.466
GPBP1	TOP2A	9606.ENSP00000264779	9606.ENSP00000411532	0	0	0	0	0.063	0	0	0.731	0.737
GTF2F1	SRSF9	9606.ENSP00000377969	9606.ENSP00000229390	0	0	0	0	0.066	0.386	0	0	0.402
GTF2F1	MED26	9606.ENSP00000377969	9606.ENSP00000263390	0	0	0	0	0.062	0.332	0	0.213	0.463
GTF2F1	TAF7	9606.ENSP00000377969	9606.ENSP00000312709	0	0	0	0	0.156	0	0.9	0.712	0.973
GTF2F1	HNRNPD	9606.ENSP00000377969	9606.ENSP00000313199	0	0	0	0	0.053	0	0.6	0.061	0.613
GTF2F1	SRRM1	9606.ENSP00000377969	9606.ENSP00000326261	0	0	0	0	0.204	0.289	0	0	0.41
GTF2F1	MYB	9606.ENSP00000377969	9606.ENSP00000339992	0	0	0	0	0.084	0	0.9	0.101	0.91
GTF2F1	ZRANB2	9606.ENSP00000377969	9606.ENSP00000359958	0	0	0	0	0.095	0	0	0.613	0.635
GTF2F1	YBX1	9606.ENSP00000377969	9606.ENSP00000361626	0	0	0	0	0.082	0	0.6	0	0.617
GTF2F1	EEF1B2	9606.ENSP00000377969	9606.ENSP00000376056	0	0	0	0	0	0.613	0	0	0.613
GTF2F1	SRSF2	9606.ENSP00000377969	9606.ENSP00000376276	0	0	0	0	0.304	0	0.6	0.082	0.722
GTF2F1	EAF1	9606.ENSP00000377969	9606.ENSP00000380054	0	0	0	0	0.063	0.227	0.6	0	0.684
GTF2F1	SFSWAP	9606.ENSP00000377969	9606.ENSP00000437738	0	0	0	0	0.057	0	0	0.736	0.74
GTF2F1	TCEA1	9606.ENSP00000377969	9606.ENSP00000428426	0	0	0	0	0.062	0.925	0.9	0.51	0.996
GYPA	ANK1	9606.ENSP00000354003	9606.ENSP00000265709	0	0	0	0	0.099	0	0	0.427	0.462
GYPA	TAL1	9606.ENSP00000354003	9606.ENSP00000294339	0	0	0	0	0.108	0	0	0.457	0.495
GYPA	AHSP	9606.ENSP00000354003	9606.ENSP00000307199	0	0	0	0	0.189	0	0	0.392	0.485
GYPA	BCL11A	9606.ENSP00000354003	9606.ENSP00000338774	0	0	0	0	0	0	0	0.408	0.408
GYPA	SPN	9606.ENSP00000354003	9606.ENSP00000353238	0	0	0	0	0.069	0	0	0.566	0.578
GYPA	DMTN	9606.ENSP00000354003	9606.ENSP00000427866	0	0	0	0	0.062	0	0	0.425	0.437
HDGF	RRP15	9606.ENSP00000357189	9606.ENSP00000355899	0	0	0	0	0.045	0	0	0.463	0.465
HDGFRP2	SMNDC1	9606.ENSP00000483345	9606.ENSP00000358616	0	0	0	0	0.113	0	0	0.372	0.419
HEMGN	ADD2	9606.ENSP00000480020	9606.ENSP00000264436	0	0	0	0	0.063	0	0	0.486	0.497
HEMGN	AHSP	9606.ENSP00000480020	9606.ENSP00000307199	0	0	0	0	0.207	0	0	0.285	0.409
HEXIM1	CDK13	9606.ENSP00000328773	9606.ENSP00000181839	0	0	0	0	0.105	0.27	0	0.295	0.499
HEXIM1	HEXIM2	9606.ENSP00000328773	9606.ENSP00000302276	0	0	0	0.879	0	0.872	0	0.944	0.886
HEXIM1	LARP1	9606.ENSP00000328773	9606.ENSP00000336721	0	0	0	0	0.065	0	0	0.43	0.444
HEXIM1	DDX21	9606.ENSP00000328773	9606.ENSP00000346120	0	0	0	0	0.087	0.486	0	0.403	0.695
HEXIM1	SRSF2	9606.ENSP00000328773	9606.ENSP00000376276	0	0	0	0	0.123	0.343	0	0.516	0.697
HEXIM2	TCF12	9606.ENSP00000302276	9606.ENSP00000388940	0	0	0	0	0	0.654	0	0	0.654
HEXIM2	HEXIM1	9606.ENSP00000302276	9606.ENSP00000328773	0	0	0	0.879	0	0.872	0	0.944	0.886
HIRIP3	MCM2	9606.ENSP00000279392	9606.ENSP00000265056	0	0	0	0	0.249	0.377	0	0	0.512
HIRIP3	TMPO	9606.ENSP00000279392	9606.ENSP00000266732	0	0	0	0	0.064	0.246	0	0.321	0.479
HIRIP3	MKI67	9606.ENSP00000279392	9606.ENSP00000357643	0	0	0	0	0.106	0	0	0.356	0.401
HN1	HN1L	9606.ENSP00000348316	9606.ENSP00000248098	0	0	0	0	0.065	0	0	0.548	0.56
HN1	STMN1	9606.ENSP00000348316	9606.ENSP00000410452	0	0	0	0	0.122	0.621	0	0	0.653
HN1L	HN1	9606.ENSP00000248098	9606.ENSP00000348316	0	0	0	0	0.065	0	0	0.548	0.56
HN1L	STMN1	9606.ENSP00000248098	9606.ENSP00000410452	0	0	0	0	0.043	0.68	0	0	0.68
HNRNPAB	SRSF9	9606.ENSP00000351108	9606.ENSP00000229390	0	0	0	0	0.322	0.182	0	0.31	0.584
HNRNPAB	PSME3	9606.ENSP00000351108	9606.ENSP00000293362	0	0	0	0	0.33	0.089	0	0.17	0.449
HNRNPAB	PHAX	9606.ENSP00000351108	9606.ENSP00000297540	0	0	0	0	0.062	0	0	0.419	0.432
HNRNPAB	HNRNPD	9606.ENSP00000351108	9606.ENSP00000313199	0	0	0	0.957	0.172	0.848	0	0.457	0.871
HNRNPAB	NOLC1	9606.ENSP00000351108	9606.ENSP00000385410	0	0	0	0	0.405	0.058	0	0.048	0.42
HNRNPAB	BRCA1	9606.ENSP00000351108	9606.ENSP00000418960	0	0	0	0	0.08	0.405	0	0	0.429
HNRNPAB	MDC1	9606.ENSP00000351108	9606.ENSP00000365588	0	0	0	0	0.077	0.415	0	0	0.437
HNRNPAB	ZC3H18	9606.ENSP00000351108	9606.ENSP00000416951	0	0	0	0	0.067	0.27	0	0.265	0.456
HNRNPAB	LRRFIP1	9606.ENSP00000351108	9606.ENSP00000375857	0	0	0	0	0.049	0	0	0.467	0.471
HNRNPAB	SF1	9606.ENSP00000351108	9606.ENSP00000366604	0	0	0	0	0.155	0.414	0	0.11	0.521
HNRNPAB	YBX1	9606.ENSP00000351108	9606.ENSP00000361626	0	0	0	0	0.184	0.405	0	0.131	0.541
HNRNPAB	SRSF2	9606.ENSP00000351108	9606.ENSP00000376276	0	0	0.291	0	0.285	0.168	0	0.228	0.631
HNRNPD	SRSF9	9606.ENSP00000313199	9606.ENSP00000229390	0	0	0	0	0.136	0.182	0	0.328	0.484
HNRNPD	SNRPC	9606.ENSP00000313199	9606.ENSP00000244520	0	0	0	0	0.108	0.696	0	0.175	0.757
HNRNPD	PSME3	9606.ENSP00000313199	9606.ENSP00000293362	0	0	0	0	0.161	0.089	0.9	0.148	0.926
HNRNPD	SLBP	9606.ENSP00000313199	9606.ENSP00000417686	0	0	0	0	0.159	0	0	0.338	0.42
HNRNPD	LARP1	9606.ENSP00000313199	9606.ENSP00000336721	0	0	0	0	0.085	0.282	0	0.193	0.424
HNRNPD	BRCA1	9606.ENSP00000313199	9606.ENSP00000418960	0	0	0	0	0.062	0.44	0	0.18	0.531
HNRNPD	SRSF5	9606.ENSP00000313199	9606.ENSP00000452123	0	0	0	0	0.143	0.213	0	0.39	0.553
HNRNPD	SF1	9606.ENSP00000313199	9606.ENSP00000366604	0	0	0	0	0.164	0.414	0	0.164	0.555
HNRNPD	RRM2	9606.ENSP00000313199	9606.ENSP00000353770	0	0	0	0	0.071	0	0	0.542	0.557
HNRNPD	BCLAF1	9606.ENSP00000313199	9606.ENSP00000435210	0	0	0	0	0.556	0	0	0.072	0.571
HNRNPD	GTF2F1	9606.ENSP00000313199	9606.ENSP00000377969	0	0	0	0	0.053	0	0.6	0.061	0.613
HNRNPD	SRSF2	9606.ENSP00000313199	9606.ENSP00000376276	0	0	0	0	0.3	0.168	0	0.431	0.64
HNRNPD	SAFB	9606.ENSP00000313199	9606.ENSP00000467423	0	0	0	0	0.126	0.344	0	0.497	0.687
HNRNPD	HNRNPAB	9606.ENSP00000313199	9606.ENSP00000351108	0	0	0	0.957	0.172	0.848	0	0.457	0.871
HNRNPD	YBX1	9606.ENSP00000313199	9606.ENSP00000361626	0	0	0	0	0.104	0.538	0	0.806	0.913
INCENP	LIG1	9606.ENSP00000378295	9606.ENSP00000263274	0	0	0	0	0.552	0	0	0	0.552
INCENP	MCM2	9606.ENSP00000378295	9606.ENSP00000265056	0	0	0	0	0.596	0	0	0.232	0.676
INCENP	ANLN	9606.ENSP00000378295	9606.ENSP00000265748	0	0	0	0	0.589	0.27	0	0.566	0.858
INCENP	TICRR	9606.ENSP00000378295	9606.ENSP00000268138	0	0	0	0	0.212	0	0	0.293	0.419
INCENP	CENPC	9606.ENSP00000378295	9606.ENSP00000273853	0	0	0	0	0.065	0.161	0	0.717	0.758
INCENP	NUP35	9606.ENSP00000378295	9606.ENSP00000295119	0	0	0	0	0.123	0	0.9	0.074	0.911
INCENP	TPX2	9606.ENSP00000378295	9606.ENSP00000300403	0	0	0	0	0.689	0	0	0.699	0.902
INCENP	SKA3	9606.ENSP00000378295	9606.ENSP00000319417	0	0	0	0	0.254	0	0	0.295	0.452
INCENP	CDCA2	9606.ENSP00000378295	9606.ENSP00000328228	0	0	0	0	0.331	0	0	0.436	0.607
INCENP	ERCC6L	9606.ENSP00000378295	9606.ENSP00000334675	0	0	0	0	0.24	0	0	0.392	0.518
INCENP	AHCTF1	9606.ENSP00000378295	9606.ENSP00000355465	0	0	0	0	0.082	0	0	0.382	0.408
INCENP	TPR	9606.ENSP00000378295	9606.ENSP00000356448	0	0	0	0	0.082	0	0.9	0.123	0.912
INCENP	MKI67	9606.ENSP00000378295	9606.ENSP00000357643	0	0	0	0	0.497	0	0	0.099	0.528
INCENP	SUMO1	9606.ENSP00000378295	9606.ENSP00000376077	0	0	0	0	0.067	0	0.9	0.162	0.915
INCENP	ATF7	9606.ENSP00000378295	9606.ENSP00000399465	0	0	0	0	0	0	0	0.41	0.41
INCENP	STMN1	9606.ENSP00000378295	9606.ENSP00000410452	0	0	0	0	0.096	0	0	0.497	0.526
INCENP	CDCA3	9606.ENSP00000378295	9606.ENSP00000442068	0	0	0	0	0.655	0	0	0.082	0.67
INCENP	TOP2A	9606.ENSP00000378295	9606.ENSP00000411532	0	0	0	0	0.699	0	0	0.264	0.769
INCENP	NUSAP1	9606.ENSP00000378295	9606.ENSP00000453403	0	0	0	0	0.926	0	0	0.277	0.944
IRS2	GAB1	9606.ENSP00000365016	9606.ENSP00000262995	0	0	0	0.546	0	0.153	0.5	0.294	0.611
IRS2	EIF4EBP1	9606.ENSP00000365016	9606.ENSP00000340691	0	0	0	0	0	0	0	0.468	0.468
IRS2	FOXO3	9606.ENSP00000365016	9606.ENSP00000385824	0	0	0	0	0.062	0.284	0	0.478	0.619
JMJD1C	RNF168	9606.ENSP00000382204	9606.ENSP00000320898	0	0	0	0	0	0.27	0	0.227	0.411
JMJD1C	MDC1	9606.ENSP00000382204	9606.ENSP00000365588	0	0	0	0	0	0.27	0	0.295	0.463
JMJD1C	ZNHIT3	9606.ENSP00000382204	9606.ENSP00000484687	0	0	0	0	0	0	0	0.421	0.421
JMJD1C	RYBP	9606.ENSP00000382204	9606.ENSP00000419494	0	0	0	0	0	0	0	0.545	0.545
KMT2D	CDK13	9606.ENSP00000301067	9606.ENSP00000181839	0	0	0	0	0.063	0.15	0	0.382	0.465
KMT2D	APC	9606.ENSP00000301067	9606.ENSP00000257430	0	0	0	0	0.062	0	0.65	0.084	0.673
KMT2D	BRCA1	9606.ENSP00000301067	9606.ENSP00000418960	0	0	0	0	0.051	0.056	0	0.419	0.434
KMT2D	BCOR	9606.ENSP00000301067	9606.ENSP00000367705	0	0	0	0	0.062	0	0	0.529	0.54
KMT2D	ATRX	9606.ENSP00000301067	9606.ENSP00000362441	0	0	0	0	0.064	0.153	0	0.476	0.548
KMT2D	PSIP1	9606.ENSP00000301067	9606.ENSP00000370109	0	0	0	0	0.084	0.056	0	0.571	0.596
KMT2D	PRRC2B	9606.ENSP00000301067	9606.ENSP00000349856	0	0	0	0	0.672	0	0	0.107	0.694
KMT2D	SPEN	9606.ENSP00000301067	9606.ENSP00000364912	0	0	0	0	0.654	0.166	0	0.395	0.81
KMT2D	SRRM2	9606.ENSP00000301067	9606.ENSP00000301740	0	0	0	0	0.836	0	0	0.061	0.839
KMT2D	TNRC6B	9606.ENSP00000301067	9606.ENSP00000401946	0	0	0	0	0.098	0	0.9	0	0.905
KNOP1	FTSJ3	9606.ENSP00000219837	9606.ENSP00000396673	0	0	0	0	0	0.427	0	0	0.426
LARP1	PATL1	9606.ENSP00000336721	9606.ENSP00000300146	0	0	0	0	0.067	0.061	0	0.578	0.598
LARP1	HNRNPD	9606.ENSP00000336721	9606.ENSP00000313199	0	0	0	0	0.085	0.282	0	0.193	0.424
LARP1	HEXIM1	9606.ENSP00000336721	9606.ENSP00000328773	0	0	0	0	0.065	0	0	0.43	0.444
LARP1	ATXN2	9606.ENSP00000336721	9606.ENSP00000366843	0	0	0	0	0.06	0.346	0	0.109	0.404
LARP1	DKC1	9606.ENSP00000336721	9606.ENSP00000358563	0	0	0	0	0.196	0.274	0	0.063	0.405
LARP1	ANKRD17	9606.ENSP00000336721	9606.ENSP00000351416	0	0	0	0	0.121	0.076	0	0.333	0.411
LARP1	EIF4ENIF1	9606.ENSP00000336721	9606.ENSP00000380659	0	0	0	0	0.062	0	0	0.434	0.446
LARP1	EIF4B	9606.ENSP00000336721	9606.ENSP00000388806	0	0	0	0	0.115	0.057	0	0.52	0.565
LARP1	YBX1	9606.ENSP00000336721	9606.ENSP00000361626	0	0	0	0	0.163	0.504	0	0.49	0.77
LARP4B	NUFIP2	9606.ENSP00000482767	9606.ENSP00000225388	0	0	0	0	0.105	0	0.72	0	0.738
LARP4B	ABCF1	9606.ENSP00000482767	9606.ENSP00000313603	0	0	0	0	0.1	0	0.9	0	0.906
LARP4B	CAPRIN1	9606.ENSP00000482767	9606.ENSP00000340329	0	0	0	0	0.061	0.419	0	0.048	0.435
LARP4B	PRRC2C	9606.ENSP00000482767	9606.ENSP00000343629	0	0	0	0	0.044	0.409	0	0	0.41
LARP4B	PHACTR4	9606.ENSP00000482767	9606.ENSP00000362942	0	0	0	0	0	0	0	0.515	0.515
LARP4B	BTF3	9606.ENSP00000482767	9606.ENSP00000369965	0	0	0	0	0.087	0	0.54	0	0.562
LARP4B	GPATCH4	9606.ENSP00000482767	9606.ENSP00000396441	0	0	0	0	0.069	0	0	0.584	0.596
LIG1	NASP	9606.ENSP00000263274	9606.ENSP00000255120	0	0	0	0	0.84	0	0	0.043	0.84
LIG1	MDC1	9606.ENSP00000263274	9606.ENSP00000365588	0	0	0	0	0.181	0	0	0.385	0.475
LIG1	BRCA1	9606.ENSP00000263274	9606.ENSP00000418960	0	0	0	0	0.147	0	0	0.454	0.515
LIG1	ATRX	9606.ENSP00000263274	9606.ENSP00000362441	0	0	0	0	0.063	0.102	0	0.507	0.549
LIG1	INCENP	9606.ENSP00000263274	9606.ENSP00000378295	0	0	0	0	0.552	0	0	0	0.552
LIG1	RRM2	9606.ENSP00000263274	9606.ENSP00000353770	0	0	0	0	0.58	0	0	0.043	0.581
LIG1	CLSPN	9606.ENSP00000263274	9606.ENSP00000312995	0	0	0	0	0.398	0	0	0.343	0.588
LIG1	TOP2B	9606.ENSP00000263274	9606.ENSP00000396704	0	0	0	0	0.348	0.057	0	0.404	0.602
LIG1	TOP2A	9606.ENSP00000263274	9606.ENSP00000411532	0	0	0	0	0.434	0.057	0	0.397	0.65
LIG1	MCM10	9606.ENSP00000263274	9606.ENSP00000418268	0	0	0	0	0.229	0	0	0.571	0.655
LIG1	SLBP	9606.ENSP00000263274	9606.ENSP00000417686	0	0	0	0	0.828	0	0	0	0.828
LIG1	RAD23A	9606.ENSP00000263274	9606.ENSP00000467024	0	0	0	0	0.064	0.726	0	0.393	0.83
LIG1	MCM2	9606.ENSP00000263274	9606.ENSP00000265056	0	0	0	0	0.956	0	0	0.492	0.976
LIN52	TOP2A	9606.ENSP00000451812	9606.ENSP00000411532	0	0	0	0	0	0	0.9	0.064	0.902
LRRFIP1	HNRNPAB	9606.ENSP00000375857	9606.ENSP00000351108	0	0	0	0	0.049	0	0	0.467	0.471
LSP1	BRCA1	9606.ENSP00000371194	9606.ENSP00000418960	0	0	0	0	0	0	0	0.49	0.489
LSP1	CAST	9606.ENSP00000371194	9606.ENSP00000379157	0	0	0	0	0	0	0	0.539	0.539
MAP2	CLSPN	9606.ENSP00000353508	9606.ENSP00000312995	0	0	0	0	0	0	0	0.445	0.445
MAP2	STMN1	9606.ENSP00000353508	9606.ENSP00000410452	0	0	0	0	0.062	0.057	0	0.414	0.436
MBD1	SUMO1	9606.ENSP00000468785	9606.ENSP00000376077	0	0	0	0	0	0.27	0.8	0.396	0.904
MBD1	ATF7IP	9606.ENSP00000468785	9606.ENSP00000440440	0	0	0	0	0	0.675	0	0.798	0.931
MCM10	RAD51AP1	9606.ENSP00000418268	9606.ENSP00000228843	0	0	0	0	0.783	0	0	0.262	0.833
MCM10	LIG1	9606.ENSP00000418268	9606.ENSP00000263274	0	0	0	0	0.229	0	0	0.571	0.655
MCM10	MCM2	9606.ENSP00000418268	9606.ENSP00000265056	0	0	0	0	0.816	0.982	0.6	0.994	0.999
MCM10	ANLN	9606.ENSP00000418268	9606.ENSP00000265748	0	0	0	0	0.583	0	0	0.081	0.6
MCM10	TICRR	9606.ENSP00000418268	9606.ENSP00000268138	0	0	0	0	0.565	0	0	0.853	0.933
MCM10	TPX2	9606.ENSP00000418268	9606.ENSP00000300403	0	0	0	0	0.785	0	0	0.218	0.825
MCM10	CLSPN	9606.ENSP00000418268	9606.ENSP00000312995	0	0	0	0	0.628	0	0.6	0.719	0.954
MCM10	SKA3	9606.ENSP00000418268	9606.ENSP00000319417	0	0	0	0	0.564	0	0	0.086	0.585
MCM10	CDCA2	9606.ENSP00000418268	9606.ENSP00000328228	0	0	0	0	0.55	0	0	0.39	0.714
MCM10	ERCC6L	9606.ENSP00000418268	9606.ENSP00000334675	0	0	0	0	0.782	0.06	0	0.293	0.842
MCM10	RRM2	9606.ENSP00000418268	9606.ENSP00000353770	0	0	0	0	0.803	0	0	0.473	0.892
MCM10	MKI67	9606.ENSP00000418268	9606.ENSP00000357643	0	0	0	0	0.793	0	0	0.316	0.852
MCM10	TOP2A	9606.ENSP00000418268	9606.ENSP00000411532	0	0	0	0	0.785	0	0	0.38	0.861
MCM10	CDCA3	9606.ENSP00000418268	9606.ENSP00000442068	0	0	0	0	0.224	0	0	0.378	0.496
MCM10	BRCA1	9606.ENSP00000418268	9606.ENSP00000418960	0	0	0	0	0.567	0.459	0	0.324	0.827
MCM10	NUSAP1	9606.ENSP00000418268	9606.ENSP00000453403	0	0	0	0	0.785	0	0	0.341	0.852
MCM2	RAD51AP1	9606.ENSP00000265056	9606.ENSP00000228843	0	0	0	0	0.694	0	0	0.331	0.787
MCM2	RIF1	9606.ENSP00000265056	9606.ENSP00000243326	0	0	0	0	0.85	0	0	0.206	0.876
MCM2	NASP	9606.ENSP00000265056	9606.ENSP00000255120	0	0	0	0	0.906	0	0	0.363	0.938
MCM2	LIG1	9606.ENSP00000265056	9606.ENSP00000263274	0	0	0	0	0.956	0	0	0.492	0.976
MCM2	SKA3	9606.ENSP00000265056	9606.ENSP00000319417	0	0	0	0	0.405	0	0	0	0.405
MCM2	MDC1	9606.ENSP00000265056	9606.ENSP00000365588	0	0	0	0	0.147	0.101	0	0.302	0.418
MCM2	ATRX	9606.ENSP00000265056	9606.ENSP00000362441	0	0	0	0	0.083	0.149	0	0.335	0.436
MCM2	TCEA1	9606.ENSP00000265056	9606.ENSP00000428426	0	0	0	0	0.089	0.27	0	0.225	0.439
MCM2	CDCA2	9606.ENSP00000265056	9606.ENSP00000328228	0	0	0	0	0.383	0	0	0.205	0.489
MCM2	ERCC6L	9606.ENSP00000265056	9606.ENSP00000334675	0	0	0	0	0.325	0.149	0	0.184	0.491
MCM2	HIRIP3	9606.ENSP00000265056	9606.ENSP00000279392	0	0	0	0	0.249	0.377	0	0	0.512
MCM2	BRCA1	9606.ENSP00000265056	9606.ENSP00000418960	0	0	0	0	0.327	0	0	0.406	0.583
MCM2	ANLN	9606.ENSP00000265056	9606.ENSP00000265748	0	0	0	0	0.523	0	0	0.201	0.603
MCM2	INCENP	9606.ENSP00000265056	9606.ENSP00000378295	0	0	0	0	0.596	0	0	0.232	0.676
MCM2	MKI67	9606.ENSP00000265056	9606.ENSP00000357643	0	0	0	0	0.593	0	0	0.407	0.748
MCM2	AHCTF1	9606.ENSP00000265056	9606.ENSP00000355465	0	0	0	0	0.072	0	0	0.786	0.793
MCM2	TPX2	9606.ENSP00000265056	9606.ENSP00000300403	0	0	0	0	0.791	0	0	0.325	0.853
MCM2	NUSAP1	9606.ENSP00000265056	9606.ENSP00000453403	0	0	0	0	0.795	0	0	0.394	0.87
MCM2	SLBP	9606.ENSP00000265056	9606.ENSP00000417686	0	0	0	0	0.863	0	0	0.347	0.907
MCM2	TOP2A	9606.ENSP00000265056	9606.ENSP00000411532	0	0	0	0	0.811	0.066	0	0.655	0.934
MCM2	CLSPN	9606.ENSP00000265056	9606.ENSP00000312995	0	0	0	0	0.576	0	0.6	0.714	0.947
MCM2	TICRR	9606.ENSP00000265056	9606.ENSP00000268138	0	0	0	0	0.342	0	0	0.937	0.958
MCM2	RRM2	9606.ENSP00000265056	9606.ENSP00000353770	0	0	0	0	0.927	0	0	0.485	0.961
MCM2	MCM10	9606.ENSP00000265056	9606.ENSP00000418268	0	0	0	0	0.816	0.982	0.6	0.994	0.999
MDC1	BOD1L1	9606.ENSP00000365588	9606.ENSP00000040738	0	0	0	0	0.047	0.459	0	0.183	0.542
MDC1	RIF1	9606.ENSP00000365588	9606.ENSP00000243326	0	0	0	0	0.066	0.405	0.6	0.262	0.814
MDC1	LIG1	9606.ENSP00000365588	9606.ENSP00000263274	0	0	0	0	0.181	0	0	0.385	0.475
MDC1	MCM2	9606.ENSP00000365588	9606.ENSP00000265056	0	0	0	0	0.147	0.101	0	0.302	0.418
MDC1	ANLN	9606.ENSP00000365588	9606.ENSP00000265748	0	0	0	0	0.097	0.391	0	0.063	0.44
MDC1	TPX2	9606.ENSP00000365588	9606.ENSP00000300403	0	0	0	0	0.088	0.391	0	0.456	0.671
MDC1	APLF	9606.ENSP00000365588	9606.ENSP00000307004	0	0	0	0	0	0	0	0.461	0.461
MDC1	CLSPN	9606.ENSP00000365588	9606.ENSP00000312995	0	0	0	0	0.082	0	0	0.621	0.638
MDC1	RNF168	9606.ENSP00000365588	9606.ENSP00000320898	0	0	0	0	0.053	0.172	0.6	0.864	0.951
MDC1	ERCC6L	9606.ENSP00000365588	9606.ENSP00000334675	0	0	0	0	0.109	0.164	0	0.316	0.446
MDC1	HNRNPAB	9606.ENSP00000365588	9606.ENSP00000351108	0	0	0	0	0.077	0.415	0	0	0.437
MDC1	TCF20	9606.ENSP00000365588	9606.ENSP00000352463	0	0	0	0	0.085	0.468	0	0.44	0.704
MDC1	ZNF148	9606.ENSP00000365588	9606.ENSP00000353863	0	0	0	0	0	0.471	0	0.054	0.479
MDC1	ATRX	9606.ENSP00000365588	9606.ENSP00000362441	0	0	0	0	0.063	0.164	0	0.466	0.545
MDC1	JMJD1C	9606.ENSP00000365588	9606.ENSP00000382204	0	0	0	0	0	0.27	0	0.295	0.463
MDC1	SUMO1	9606.ENSP00000365588	9606.ENSP00000376077	0	0	0	0	0.065	0.222	0.8	0.407	0.902
MDC1	TOP2A	9606.ENSP00000365588	9606.ENSP00000411532	0	0	0	0	0.11	0.107	0	0.9	0.915
MDC1	RNF4	9606.ENSP00000365588	9606.ENSP00000426503	0	0	0	0	0.062	0.27	0.9	0.812	0.985
MDC1	BRCA1	9606.ENSP00000365588	9606.ENSP00000418960	0	0	0	0	0.062	0.873	0.9	0.935	0.999
MED19	MED26	9606.ENSP00000337340	9606.ENSP00000263390	0	0	0	0	0.076	0.871	0.8	0.831	0.995
MED19	ZC3H13	9606.ENSP00000337340	9606.ENSP00000282007	0	0	0	0	0	0.27	0	0.289	0.459
MED19	TMF1	9606.ENSP00000337340	9606.ENSP00000381567	0	0	0	0	0	0	0	0.402	0.402
MED19	BCLAF1	9606.ENSP00000337340	9606.ENSP00000435210	0	0	0	0	0	0	0.54	0	0.54
MED19	THRAP3	9606.ENSP00000337340	9606.ENSP00000346634	0	0	0	0	0	0	0.6	0.217	0.673
MED26	TCEA1	9606.ENSP00000263390	9606.ENSP00000428426	0	0	0	0.59	0	0.27	0	0.524	0.42
MED26	GTF2F1	9606.ENSP00000263390	9606.ENSP00000377969	0	0	0	0	0.062	0.332	0	0.213	0.463
MED26	SERBP1	9606.ENSP00000263390	9606.ENSP00000360034	0	0	0	0	0	0	0	0.473	0.473
MED26	BCLAF1	9606.ENSP00000263390	9606.ENSP00000435210	0	0	0	0	0.065	0	0.54	0	0.551
MED26	EAF1	9606.ENSP00000263390	9606.ENSP00000380054	0	0	0	0	0	0.289	0	0.435	0.582
MED26	TAF7	9606.ENSP00000263390	9606.ENSP00000312709	0	0	0	0	0.065	0.27	0	0.7	0.777
MED26	THRAP3	9606.ENSP00000263390	9606.ENSP00000346634	0	0	0	0	0	0	0.9	0.066	0.902
MED26	MED19	9606.ENSP00000263390	9606.ENSP00000337340	0	0	0	0	0.076	0.871	0.8	0.831	0.995
MKI67	RAD51AP1	9606.ENSP00000357643	9606.ENSP00000228843	0	0	0	0	0.594	0	0	0.165	0.646
MKI67	MCM2	9606.ENSP00000357643	9606.ENSP00000265056	0	0	0	0	0.593	0	0	0.407	0.748
MKI67	ANLN	9606.ENSP00000357643	9606.ENSP00000265748	0	0	0	0	0.59	0.27	0	0.287	0.768
MKI67	TICRR	9606.ENSP00000357643	9606.ENSP00000268138	0	0	0	0	0.734	0.27	0	0.089	0.808
MKI67	HIRIP3	9606.ENSP00000357643	9606.ENSP00000279392	0	0	0	0	0.106	0	0	0.356	0.401
MKI67	TPX2	9606.ENSP00000357643	9606.ENSP00000300403	0	0	0	0	0.847	0.27	0	0.4	0.927
MKI67	CLSPN	9606.ENSP00000357643	9606.ENSP00000312995	0	0	0	0	0.659	0	0	0.083	0.674
MKI67	SKA3	9606.ENSP00000357643	9606.ENSP00000319417	0	0	0	0	0.58	0	0	0.096	0.605
MKI67	CDCA2	9606.ENSP00000357643	9606.ENSP00000328228	0	0	0	0.541	0.61	0	0	0.255	0.65
MKI67	ERCC6L	9606.ENSP00000357643	9606.ENSP00000334675	0	0	0	0	0.568	0	0	0.112	0.6
MKI67	EIF4EBP1	9606.ENSP00000357643	9606.ENSP00000340691	0	0	0	0	0.098	0	0	0.4	0.435
MKI67	RRM2	9606.ENSP00000357643	9606.ENSP00000353770	0	0	0	0	0.923	0	0	0.596	0.967
MKI67	CXCR4	9606.ENSP00000357643	9606.ENSP00000386884	0	0	0	0	0.062	0	0	0.39	0.404
MKI67	INCENP	9606.ENSP00000357643	9606.ENSP00000378295	0	0	0	0	0.497	0	0	0.099	0.528
MKI67	BRCA1	9606.ENSP00000357643	9606.ENSP00000418960	0	0	0	0	0.389	0.128	0	0.422	0.665
MKI67	CDCA3	9606.ENSP00000357643	9606.ENSP00000442068	0	0	0	0	0.728	0	0	0.364	0.82
MKI67	MCM10	9606.ENSP00000357643	9606.ENSP00000418268	0	0	0	0	0.793	0	0	0.316	0.852
MKI67	NUSAP1	9606.ENSP00000357643	9606.ENSP00000453403	0	0	0	0	0.964	0	0	0.469	0.98
MKI67	TOP2A	9606.ENSP00000357643	9606.ENSP00000411532	0	0	0	0	0.966	0	0	0.66	0.988
MYB	TCF3	9606.ENSP00000339992	9606.ENSP00000262965	0	0	0	0	0.085	0	0.6	0.422	0.77
MYB	TAL1	9606.ENSP00000339992	9606.ENSP00000294339	0	0	0	0	0.062	0.27	0.8	0.75	0.961
MYB	SRRM2	9606.ENSP00000339992	9606.ENSP00000301740	0	0	0	0	0.064	0.345	0	0.115	0.41
MYB	CWC25	9606.ENSP00000339992	9606.ENSP00000478070	0	0	0	0	0.066	0.369	0	0.144	0.451
MYB	SUMO1	9606.ENSP00000339992	9606.ENSP00000376077	0	0	0	0	0.051	0.27	0	0.314	0.483
MYB	TCF12	9606.ENSP00000339992	9606.ENSP00000388940	0	0	0	0	0.064	0	0.6	0.31	0.719
MYB	GTF2F1	9606.ENSP00000339992	9606.ENSP00000377969	0	0	0	0	0.084	0	0.9	0.101	0.91
NACA	RPLP2	9606.ENSP00000448035	9606.ENSP00000322419	0	0	0	0	0.877	0	0	0.062	0.88
NACA	YBX1	9606.ENSP00000448035	9606.ENSP00000361626	0	0	0	0	0.349	0.79	0	0.052	0.859
NACA	BTF3	9606.ENSP00000448035	9606.ENSP00000369965	0	0	0	0	0.737	0.987	0.54	0.466	0.999
NACA	EEF1B2	9606.ENSP00000448035	9606.ENSP00000376056	0	0	0	0	0.654	0.056	0	0.415	0.792
NASP	TOP2A	9606.ENSP00000255120	9606.ENSP00000411532	0	0	0	0	0.307	0	0	0.302	0.496
NASP	PTMA	9606.ENSP00000255120	9606.ENSP00000344547	0	0	0	0	0.401	0	0	0.269	0.543
NASP	TOP2B	9606.ENSP00000255120	9606.ENSP00000396704	0	0	0	0	0.183	0	0	0.475	0.553
NASP	RRM2	9606.ENSP00000255120	9606.ENSP00000353770	0	0	0	0	0.529	0	0	0.227	0.621
NASP	LIG1	9606.ENSP00000255120	9606.ENSP00000263274	0	0	0	0	0.84	0	0	0.043	0.84
NASP	MCM2	9606.ENSP00000255120	9606.ENSP00000265056	0	0	0	0	0.906	0	0	0.363	0.938
NASP	SLBP	9606.ENSP00000255120	9606.ENSP00000417686	0	0	0	0	0.924	0	0	0.828	0.986
NOL7	PSME3	9606.ENSP00000405674	9606.ENSP00000293362	0	0	0	0	0.903	0	0	0.124	0.912
NOL7	DKC1	9606.ENSP00000405674	9606.ENSP00000358563	0	0	0	0	0.765	0	0	0	0.765
NOL7	GNL3	9606.ENSP00000405674	9606.ENSP00000395772	0	0	0	0	0.495	0	0	0.326	0.645
NOLC1	GLTSCR2	9606.ENSP00000385410	9606.ENSP00000246802	0	0	0	0	0.51	0	0	0.561	0.776
NOLC1	PHAX	9606.ENSP00000385410	9606.ENSP00000297540	0	0	0	0	0.137	0	0	0.656	0.692
NOLC1	SRRM1	9606.ENSP00000385410	9606.ENSP00000326261	0	0	0	0	0.072	0.272	0	0.328	0.506
NOLC1	DDX21	9606.ENSP00000385410	9606.ENSP00000346120	0	0	0	0	0.611	0.086	0	0.287	0.724
NOLC1	HNRNPAB	9606.ENSP00000385410	9606.ENSP00000351108	0	0	0	0	0.405	0.058	0	0.048	0.42
NOLC1	RRP15	9606.ENSP00000385410	9606.ENSP00000355899	0	0	0	0	0.791	0.126	0	0	0.809
NOLC1	DKC1	9606.ENSP00000385410	9606.ENSP00000358563	0	0	0	0	0.862	0.6	0.36	0.944	0.997
NOLC1	TCOF1	9606.ENSP00000385410	9606.ENSP00000367028	0	0	0	0.552	0.126	0.633	0	0.905	0.8
NOLC1	SRSF5	9606.ENSP00000385410	9606.ENSP00000452123	0	0	0	0	0.078	0	0	0.449	0.47
NOLC1	GPATCH4	9606.ENSP00000385410	9606.ENSP00000396441	0	0	0	0	0.363	0.258	0	0.14	0.558
NOLC1	NOP14	9606.ENSP00000385410	9606.ENSP00000405068	0	0	0	0	0.7	0	0	0.154	0.735
NOLC1	FTSJ3	9606.ENSP00000385410	9606.ENSP00000396673	0	0	0	0	0.859	0	0	0.048	0.86
NOLC1	GNL3	9606.ENSP00000385410	9606.ENSP00000395772	0	0	0	0	0.824	0	0	0.506	0.909
NOP14	GLTSCR2	9606.ENSP00000405068	9606.ENSP00000246802	0	0	0	0	0.872	0	0	0.105	0.881
NOP14	DDX21	9606.ENSP00000405068	9606.ENSP00000346120	0	0	0	0	0.512	0.153	0	0.148	0.617
NOP14	RRP15	9606.ENSP00000405068	9606.ENSP00000355899	0	0	0	0	0.831	0	0	0.308	0.878
NOP14	DKC1	9606.ENSP00000405068	9606.ENSP00000358563	0	0	0	0	0.819	0	0	0.167	0.843
NOP14	NOLC1	9606.ENSP00000405068	9606.ENSP00000385410	0	0	0	0	0.7	0	0	0.154	0.735
NOP14	EIF4B	9606.ENSP00000405068	9606.ENSP00000388806	0	0	0	0	0.458	0	0	0.067	0.472
NOP14	GNL3	9606.ENSP00000405068	9606.ENSP00000395772	0	0	0	0	0.816	0.386	0	0.101	0.889
NOP14	GPATCH4	9606.ENSP00000405068	9606.ENSP00000396441	0	0	0	0	0.524	0.313	0	0	0.659
NOP14	FTSJ3	9606.ENSP00000405068	9606.ENSP00000396673	0	0	0	0	0.887	0.369	0.9	0	0.992
NOP14	DNTTIP2	9606.ENSP00000405068	9606.ENSP00000411010	0	0	0	0	0.45	0.798	0	0.451	0.933
NUCKS1	PHAX	9606.ENSP00000356110	9606.ENSP00000297540	0	0	0	0	0.059	0.835	0	0	0.838
NUFIP2	BTF3	9606.ENSP00000225388	9606.ENSP00000369965	0	0	0	0	0.087	0	0.54	0	0.562
NUFIP2	BAG3	9606.ENSP00000225388	9606.ENSP00000358081	0	0	0	0	0.06	0	0	0.569	0.578
NUFIP2	GPATCH4	9606.ENSP00000225388	9606.ENSP00000396441	0	0	0	0	0.046	0	0	0.618	0.62
NUFIP2	CAPRIN1	9606.ENSP00000225388	9606.ENSP00000340329	0	0	0	0	0.085	0.402	0	0.396	0.641
NUFIP2	ATXN2	9606.ENSP00000225388	9606.ENSP00000366843	0	0	0	0	0.047	0.628	0	0.185	0.685
NUFIP2	LARP4B	9606.ENSP00000225388	9606.ENSP00000482767	0	0	0	0	0.105	0	0.72	0	0.738
NUFIP2	ABCF1	9606.ENSP00000225388	9606.ENSP00000313603	0	0	0	0	0.079	0	0.72	0.136	0.757
NUP35	CASC3	9606.ENSP00000295119	9606.ENSP00000264645	0	0	0	0	0	0	0.6	0	0.6
NUP35	RRP15	9606.ENSP00000295119	9606.ENSP00000355899	0	0	0	0	0.282	0	0	0.491	0.619
NUP35	SRRM1	9606.ENSP00000295119	9606.ENSP00000326261	0	0	0	0	0.096	0	0.6	0	0.623
NUP35	SUMO1	9606.ENSP00000295119	9606.ENSP00000376077	0	0	0	0	0.132	0	0.6	0.058	0.644
NUP35	TOP2A	9606.ENSP00000295119	9606.ENSP00000411532	0	0	0	0	0.066	0	0.9	0.073	0.905
NUP35	PHAX	9606.ENSP00000295119	9606.ENSP00000297540	0	0	0	0	0.092	0	0.9	0	0.905
NUP35	TPR	9606.ENSP00000295119	9606.ENSP00000356448	0	0	0	0	0.127	0	0.8	0.505	0.906
NUP35	FIP1L1	9606.ENSP00000295119	9606.ENSP00000336752	0	0	0	0	0.146	0	0.9	0	0.911
NUP35	INCENP	9606.ENSP00000295119	9606.ENSP00000378295	0	0	0	0	0.123	0	0.9	0.074	0.911
NUP35	SLBP	9606.ENSP00000295119	9606.ENSP00000417686	0	0	0	0	0.233	0	0.9	0	0.92
NUP35	AHCTF1	9606.ENSP00000295119	9606.ENSP00000355465	0	0	0	0	0.081	0.39	0.6	0.826	0.955
NUSAP1	RAD51AP1	9606.ENSP00000453403	9606.ENSP00000228843	0	0	0	0	0.796	0	0	0.352	0.862
NUSAP1	MCM2	9606.ENSP00000453403	9606.ENSP00000265056	0	0	0	0	0.795	0	0	0.394	0.87
NUSAP1	ANLN	9606.ENSP00000453403	9606.ENSP00000265748	0	0	0	0	0.811	0	0	0.363	0.874
NUSAP1	TMPO	9606.ENSP00000453403	9606.ENSP00000266732	0	0	0	0	0.56	0.198	0	0.326	0.741
NUSAP1	TICRR	9606.ENSP00000453403	9606.ENSP00000268138	0	0	0	0	0.56	0	0	0.168	0.619
NUSAP1	TPX2	9606.ENSP00000453403	9606.ENSP00000300403	0	0	0	0	0.913	0	0	0.661	0.969
NUSAP1	CLSPN	9606.ENSP00000453403	9606.ENSP00000312995	0	0	0	0	0.386	0	0	0.22	0.501
NUSAP1	SKA3	9606.ENSP00000453403	9606.ENSP00000319417	0	0	0	0	0.614	0	0	0.12	0.646
NUSAP1	CDCA2	9606.ENSP00000453403	9606.ENSP00000328228	0	0	0	0	0.702	0	0	0.403	0.814
NUSAP1	ERCC6L	9606.ENSP00000453403	9606.ENSP00000334675	0	0	0	0	0.562	0	0	0.262	0.663
NUSAP1	RRM2	9606.ENSP00000453403	9606.ENSP00000353770	0	0	0	0	0.924	0	0	0.595	0.968
NUSAP1	MKI67	9606.ENSP00000453403	9606.ENSP00000357643	0	0	0	0	0.964	0	0	0.469	0.98
NUSAP1	INCENP	9606.ENSP00000453403	9606.ENSP00000378295	0	0	0	0	0.926	0	0	0.277	0.944
NUSAP1	STMN1	9606.ENSP00000453403	9606.ENSP00000410452	0	0	0	0	0.298	0	0	0.333	0.511
NUSAP1	TOP2A	9606.ENSP00000453403	9606.ENSP00000411532	0	0	0	0	0.966	0	0	0.649	0.987
NUSAP1	SLBP	9606.ENSP00000453403	9606.ENSP00000417686	0	0	0	0	0.553	0	0	0.23	0.641
NUSAP1	MCM10	9606.ENSP00000453403	9606.ENSP00000418268	0	0	0	0	0.785	0	0	0.341	0.852
NUSAP1	BRCA1	9606.ENSP00000453403	9606.ENSP00000418960	0	0	0	0	0.408	0	0	0.234	0.527
NUSAP1	CDCA3	9606.ENSP00000453403	9606.ENSP00000442068	0	0	0	0	0.883	0	0	0.511	0.94
OTUD5	RCSD1	9606.ENSP00000156084	9606.ENSP00000356828	0	0	0	0	0	0	0	0.552	0.552
PATL1	TOP2A	9606.ENSP00000300146	9606.ENSP00000411532	0	0	0	0	0.063	0.331	0	0.142	0.416
PATL1	SART1	9606.ENSP00000300146	9606.ENSP00000310448	0	0	0	0	0.082	0.271	0	0.199	0.418
PATL1	ATXN2	9606.ENSP00000300146	9606.ENSP00000366843	0	0	0	0	0.066	0	0	0.445	0.46
PATL1	LARP1	9606.ENSP00000300146	9606.ENSP00000336721	0	0	0	0	0.067	0.061	0	0.578	0.598
PATL1	EIF4ENIF1	9606.ENSP00000300146	9606.ENSP00000380659	0	0	0	0	0.096	0.258	0	0.759	0.824
PDLIM5	SPECC1	9606.ENSP00000480359	9606.ENSP00000261503	0	0	0	0	0.062	0.149	0.54	0.059	0.608
PDLIM5	EIF4ENIF1	9606.ENSP00000480359	9606.ENSP00000380659	0	0	0	0	0	0	0	0.456	0.456
PHACTR4	LARP4B	9606.ENSP00000362942	9606.ENSP00000482767	0	0	0	0	0	0	0	0.515	0.515
PHACTR4	GPATCH4	9606.ENSP00000362942	9606.ENSP00000396441	0	0	0	0	0	0	0	0.556	0.556
PHAX	NUP35	9606.ENSP00000297540	9606.ENSP00000295119	0	0	0	0	0.092	0	0.9	0	0.905
PHAX	SLBP	9606.ENSP00000297540	9606.ENSP00000417686	0	0	0	0	0.146	0	0	0.337	0.409
PHAX	HNRNPAB	9606.ENSP00000297540	9606.ENSP00000351108	0	0	0	0	0.062	0	0	0.419	0.432
PHAX	PJA2	9606.ENSP00000297540	9606.ENSP00000354775	0	0	0	0	0.344	0	0	0.254	0.49
PHAX	ZC3H18	9606.ENSP00000297540	9606.ENSP00000416951	0	0	0	0	0.273	0	0	0.392	0.539
PHAX	DKC1	9606.ENSP00000297540	9606.ENSP00000358563	0	0	0	0	0.069	0	0	0.536	0.549
PHAX	C17orf85	9606.ENSP00000297540	9606.ENSP00000373657	0	0	0	0	0.107	0.27	0	0.564	0.691
PHAX	NOLC1	9606.ENSP00000297540	9606.ENSP00000385410	0	0	0	0	0.137	0	0	0.656	0.692
PHAX	NUCKS1	9606.ENSP00000297540	9606.ENSP00000356110	0	0	0	0	0.059	0.835	0	0	0.838
PHAX	TPR	9606.ENSP00000297540	9606.ENSP00000356448	0	0	0	0	0.086	0	0.9	0	0.904
PHAX	SRRT	9606.ENSP00000297540	9606.ENSP00000480421	0	0	0	0	0.132	0	0.8	0.977	0.995
PJA2	PHAX	9606.ENSP00000354775	9606.ENSP00000297540	0	0	0	0	0.344	0	0	0.254	0.49
POLR3G	BDP1	9606.ENSP00000382058	9606.ENSP00000351575	0	0	0	0	0	0	0.6	0.529	0.803
PPIG	THOC2	9606.ENSP00000260970	9606.ENSP00000245838	0	0	0	0	0.525	0.151	0	0	0.579
PPIG	SRSF2	9606.ENSP00000260970	9606.ENSP00000376276	0	0	0	0	0.157	0.078	0	0.309	0.416
PPIG	ZC3H18	9606.ENSP00000260970	9606.ENSP00000416951	0	0	0	0	0.157	0.413	0	0	0.484
PPIG	ATRX	9606.ENSP00000260970	9606.ENSP00000362441	0	0	0	0	0.254	0.077	0	0.697	0.773
PPIG	CASC3	9606.ENSP00000260970	9606.ENSP00000264645	0	0	0	0	0	0.8	0	0.043	0.8
PPIG	CWC25	9606.ENSP00000260970	9606.ENSP00000478070	0	0	0	0	0.085	0.8	0	0.087	0.818
PPIG	SRRM2	9606.ENSP00000260970	9606.ENSP00000301740	0	0	0	0	0.126	0.826	0	0.099	0.851
PPP1R35	RCSD1	9606.ENSP00000292330	9606.ENSP00000356828	0	0	0	0	0	0	0	0.68	0.68
PRRC2A	CCDC86	9606.ENSP00000365201	9606.ENSP00000227520	0	0	0	0	0.064	0	0	0.535	0.546
PRRC2A	ZFAND2B	9606.ENSP00000365201	9606.ENSP00000289528	0	0	0	0	0	0.392	0	0.21	0.499
PRRC2A	PRRC2C	9606.ENSP00000365201	9606.ENSP00000343629	0	0	0	0.651	0.047	0.459	0	0.447	0.542
PRRC2A	WAC	9606.ENSP00000365201	9606.ENSP00000346986	0	0	0	0	0.074	0	0	0.474	0.492
PRRC2A	TCOF1	9606.ENSP00000365201	9606.ENSP00000367028	0	0	0	0	0.102	0	0	0.385	0.424
PRRC2A	UBAP2L	9606.ENSP00000365201	9606.ENSP00000389445	0	0	0	0	0.136	0.442	0	0.235	0.599
PRRC2B	BRD8	9606.ENSP00000349856	9606.ENSP00000254900	0	0	0	0	0.064	0	0	0.44	0.454
PRRC2B	KMT2D	9606.ENSP00000349856	9606.ENSP00000301067	0	0	0	0	0.672	0	0	0.107	0.694
PRRC2B	ATXN2	9606.ENSP00000349856	9606.ENSP00000366843	0	0	0	0	0.089	0.375	0	0.086	0.434
PRRC2C	ZC3H13	9606.ENSP00000343629	9606.ENSP00000282007	0	0	0	0	0.652	0	0	0.067	0.661
PRRC2C	CAPRIN1	9606.ENSP00000343629	9606.ENSP00000340329	0	0	0	0	0.111	0.367	0	0	0.413
PRRC2C	LARP4B	9606.ENSP00000343629	9606.ENSP00000482767	0	0	0	0	0.044	0.409	0	0	0.41
PRRC2C	UBAP2L	9606.ENSP00000343629	9606.ENSP00000389445	0	0	0	0	0.14	0.292	0	0.253	0.506
PRRC2C	PRRC2A	9606.ENSP00000343629	9606.ENSP00000365201	0	0	0	0.651	0.047	0.459	0	0.447	0.542
PRRC2C	ANKRD17	9606.ENSP00000343629	9606.ENSP00000351416	0	0	0	0	0.327	0.421	0	0	0.593
PRRC2C	SON	9606.ENSP00000343629	9606.ENSP00000348984	0	0	0	0	0.615	0	0	0	0.615
PRRC2C	ZC3H11A	9606.ENSP00000343629	9606.ENSP00000438527	0	0	0	0	0.139	0	0	0.604	0.644
PSIP1	GPBP1	9606.ENSP00000370109	9606.ENSP00000264779	0	0	0	0	0.084	0	0	0.441	0.466
PSIP1	KMT2D	9606.ENSP00000370109	9606.ENSP00000301067	0	0	0	0	0.084	0.056	0	0.571	0.596
PSIP1	SON	9606.ENSP00000370109	9606.ENSP00000348984	0	0	0	0	0.062	0.271	0	0.354	0.519
PSIP1	SERBP1	9606.ENSP00000370109	9606.ENSP00000360034	0	0	0	0	0.152	0.27	0	0.427	0.614
PSIP1	SUMO1	9606.ENSP00000370109	9606.ENSP00000376077	0	0	0	0	0.065	0.27	0	0.232	0.431
PSIP1	CXCR4	9606.ENSP00000370109	9606.ENSP00000386884	0	0	0	0	0	0.209	0	0.345	0.459
PSIP1	ZC3H18	9606.ENSP00000370109	9606.ENSP00000416951	0	0	0	0	0.055	0.489	0	0	0.496
PSME3	ZFAND2B	9606.ENSP00000293362	9606.ENSP00000289528	0	0	0	0	0	0.105	0	0.388	0.429
PSME3	SUMO1	9606.ENSP00000293362	9606.ENSP00000376077	0	0	0	0	0.288	0	0	0.217	0.418
PSME3	HNRNPAB	9606.ENSP00000293362	9606.ENSP00000351108	0	0	0	0	0.33	0.089	0	0.17	0.449
PSME3	EAF1	9606.ENSP00000293362	9606.ENSP00000380054	0	0	0	0	0	0.457	0	0	0.457
PSME3	SRRT	9606.ENSP00000293362	9606.ENSP00000480421	0	0	0	0	0.304	0.272	0	0.047	0.474
PSME3	DNTTIP2	9606.ENSP00000293362	9606.ENSP00000411010	0	0	0	0	0.48	0	0	0	0.48
PSME3	SF1	9606.ENSP00000293362	9606.ENSP00000366604	0	0	0	0	0.247	0	0	0.557	0.652
PSME3	BCLAF1	9606.ENSP00000293362	9606.ENSP00000435210	0	0	0	0	0.273	0.27	0	0.562	0.747
PSME3	DKC1	9606.ENSP00000293362	9606.ENSP00000358563	0	0	0	0	0.823	0	0	0	0.823
PSME3	NOL7	9606.ENSP00000293362	9606.ENSP00000405674	0	0	0	0	0.903	0	0	0.124	0.912
PSME3	HNRNPD	9606.ENSP00000293362	9606.ENSP00000313199	0	0	0	0	0.161	0.089	0.9	0.148	0.926
PTMA	C11orf58	9606.ENSP00000344547	9606.ENSP00000228136	0	0	0	0	0.157	0.272	0	0.522	0.681
PTMA	NASP	9606.ENSP00000344547	9606.ENSP00000255120	0	0	0	0	0.401	0	0	0.269	0.543
PTMA	GNL3	9606.ENSP00000344547	9606.ENSP00000395772	0	0	0	0	0.089	0	0	0.389	0.42
PTMA	TMSB4X	9606.ENSP00000344547	9606.ENSP00000370010	0	0	0	0	0.063	0	0	0.473	0.485
PTMA	SRSF2	9606.ENSP00000344547	9606.ENSP00000376276	0	0	0	0	0.212	0.618	0	0	0.686
RAD23A	LIG1	9606.ENSP00000467024	9606.ENSP00000263274	0	0	0	0	0.064	0.726	0	0.393	0.83
RAD23A	ERCC6L	9606.ENSP00000467024	9606.ENSP00000334675	0	0	0	0	0	0.203	0	0.293	0.412
RAD23A	BCL11A	9606.ENSP00000467024	9606.ENSP00000338774	0	0	0	0	0	0.077	0	0.434	0.455
RAD23A	EPS15	9606.ENSP00000467024	9606.ENSP00000360798	0	0	0	0	0.049	0.4	0	0.26	0.541
RAD23A	SUMO1	9606.ENSP00000467024	9606.ENSP00000376077	0	0	0	0	0.097	0.076	0.6	0.346	0.752
RAD51AP1	TMPO	9606.ENSP00000228843	9606.ENSP00000266732	0	0	0	0	0.432	0	0	0.06	0.444
RAD51AP1	ATRX	9606.ENSP00000228843	9606.ENSP00000362441	0	0	0	0	0.062	0	0	0.493	0.504
RAD51AP1	CDCA3	9606.ENSP00000228843	9606.ENSP00000442068	0	0	0	0	0.34	0	0	0.292	0.513
RAD51AP1	CLSPN	9606.ENSP00000228843	9606.ENSP00000312995	0	0	0	0	0.451	0	0	0.19	0.536
RAD51AP1	ERCC6L	9606.ENSP00000228843	9606.ENSP00000334675	0	0	0	0	0.55	0	0	0.108	0.581
RAD51AP1	SKA3	9606.ENSP00000228843	9606.ENSP00000319417	0	0	0	0	0.572	0	0	0.135	0.614
RAD51AP1	CDCA2	9606.ENSP00000228843	9606.ENSP00000328228	0	0	0	0	0.561	0	0	0.203	0.635
RAD51AP1	MKI67	9606.ENSP00000228843	9606.ENSP00000357643	0	0	0	0	0.594	0	0	0.165	0.646
RAD51AP1	MCM2	9606.ENSP00000228843	9606.ENSP00000265056	0	0	0	0	0.694	0	0	0.331	0.787
RAD51AP1	ANLN	9606.ENSP00000228843	9606.ENSP00000265748	0	0	0	0	0.778	0	0	0.134	0.799
RAD51AP1	RRM2	9606.ENSP00000228843	9606.ENSP00000353770	0	0	0	0	0.792	0	0	0.198	0.826
RAD51AP1	MCM10	9606.ENSP00000228843	9606.ENSP00000418268	0	0	0	0	0.783	0	0	0.262	0.833
RAD51AP1	TPX2	9606.ENSP00000228843	9606.ENSP00000300403	0	0	0	0	0.802	0	0	0.218	0.838
RAD51AP1	BRCA1	9606.ENSP00000228843	9606.ENSP00000418960	0	0	0	0	0.368	0	0.6	0.459	0.851
RAD51AP1	NUSAP1	9606.ENSP00000228843	9606.ENSP00000453403	0	0	0	0	0.796	0	0	0.352	0.862
RAD51AP1	TOP2A	9606.ENSP00000228843	9606.ENSP00000411532	0	0	0	0	0.824	0	0	0.525	0.913
RAI1	TCF20	9606.ENSP00000323074	9606.ENSP00000352463	0	0	0	0.576	0.087	0.647	0	0.598	0.746
RANBP3	TMPO	9606.ENSP00000341483	9606.ENSP00000266732	0	0	0	0	0.182	0	0	0.558	0.622
RANBP3	SF1	9606.ENSP00000341483	9606.ENSP00000366604	0	0	0	0	0.273	0.244	0	0	0.426
RBM3	CAPRIN1	9606.ENSP00000365950	9606.ENSP00000340329	0	0	0	0	0.112	0.322	0	0.097	0.409
RCSD1	OTUD5	9606.ENSP00000356828	9606.ENSP00000156084	0	0	0	0	0	0	0	0.552	0.552
RCSD1	PPP1R35	9606.ENSP00000356828	9606.ENSP00000292330	0	0	0	0	0	0	0	0.68	0.68
RERE	TCEA1	9606.ENSP00000338629	9606.ENSP00000428426	0	0	0	0	0	0	0	0.413	0.412
RERE	BCL11A	9606.ENSP00000338629	9606.ENSP00000338774	0	0	0	0	0	0.066	0	0.43	0.444
RIF1	SUMO1	9606.ENSP00000243326	9606.ENSP00000376077	0	0	0	0	0.062	0	0.6	0	0.608
RIF1	RNF168	9606.ENSP00000243326	9606.ENSP00000320898	0	0	0	0	0.091	0	0.6	0.305	0.725
RIF1	MDC1	9606.ENSP00000243326	9606.ENSP00000365588	0	0	0	0	0.066	0.405	0.6	0.262	0.814
RIF1	BDP1	9606.ENSP00000243326	9606.ENSP00000351575	0	0	0	0	0.831	0	0	0	0.831
RIF1	BRCA1	9606.ENSP00000243326	9606.ENSP00000418960	0	0	0	0	0.092	0.405	0.65	0.298	0.849
RIF1	MCM2	9606.ENSP00000243326	9606.ENSP00000265056	0	0	0	0	0.85	0	0	0.206	0.876
RNF168	RIF1	9606.ENSP00000320898	9606.ENSP00000243326	0	0	0	0	0.091	0	0.6	0.305	0.725
RNF168	CLSPN	9606.ENSP00000320898	9606.ENSP00000312995	0	0	0	0	0.085	0	0	0.478	0.503
RNF168	JMJD1C	9606.ENSP00000320898	9606.ENSP00000382204	0	0	0	0	0	0.27	0	0.227	0.411
RNF168	TOP2A	9606.ENSP00000320898	9606.ENSP00000411532	0	0	0	0	0	0.27	0	0.312	0.477
RNF168	SUMO1	9606.ENSP00000320898	9606.ENSP00000376077	0	0	0	0	0	0.27	0.8	0.416	0.907
RNF168	MDC1	9606.ENSP00000320898	9606.ENSP00000365588	0	0	0	0	0.053	0.172	0.6	0.864	0.951
RNF168	RNF4	9606.ENSP00000320898	9606.ENSP00000426503	0	0	0	0	0.064	0.27	0.9	0.518	0.962
RNF168	BRCA1	9606.ENSP00000320898	9606.ENSP00000418960	0	0	0	0	0.082	0.647	0.6	0.837	0.976
RNF4	CENPC	9606.ENSP00000426503	9606.ENSP00000273853	0	0	0	0	0	0.27	0	0.22	0.406
RNF4	SART1	9606.ENSP00000426503	9606.ENSP00000310448	0	0	0	0	0.053	0.486	0	0.141	0.545
RNF4	RNF168	9606.ENSP00000426503	9606.ENSP00000320898	0	0	0	0	0.064	0.27	0.9	0.518	0.962
RNF4	TCF20	9606.ENSP00000426503	9606.ENSP00000352463	0	0	0	0	0.062	0.486	0	0.716	0.851
RNF4	MDC1	9606.ENSP00000426503	9606.ENSP00000365588	0	0	0	0	0.062	0.27	0.9	0.812	0.985
RNF4	SUMO1	9606.ENSP00000426503	9606.ENSP00000376077	0	0	0	0	0	0.9	0.9	0.824	0.998
RNF4	BRCA1	9606.ENSP00000426503	9606.ENSP00000418960	0	0	0	0	0	0	0.9	0.469	0.944
RPLP2	DKC1	9606.ENSP00000322419	9606.ENSP00000358563	0	0	0	0	0.184	0.252	0	0.107	0.407
RPLP2	SLC16A1	9606.ENSP00000322419	9606.ENSP00000441065	0	0	0	0	0.049	0	0	0.441	0.446
RPLP2	SUMO1	9606.ENSP00000322419	9606.ENSP00000376077	0	0	0	0	0.278	0.161	0	0.163	0.449
RPLP2	RRP15	9606.ENSP00000322419	9606.ENSP00000355899	0	0	0	0	0.107	0	0	0.424	0.464
RPLP2	BTF3	9606.ENSP00000322419	9606.ENSP00000369965	0	0	0	0	0.595	0.567	0	0.101	0.828
RPLP2	NACA	9606.ENSP00000322419	9606.ENSP00000448035	0	0	0	0	0.877	0	0	0.062	0.88
RPLP2	SERBP1	9606.ENSP00000322419	9606.ENSP00000360034	0	0	0	0	0.201	0.955	0	0	0.962
RPLP2	EEF1B2	9606.ENSP00000322419	9606.ENSP00000376056	0.045	0	0	0	0.95	0.895	0	0.412	0.996
RRBP1	TMPO	9606.ENSP00000367038	9606.ENSP00000266732	0	0	0	0	0	0.471	0	0	0.471
RRM2	RAD51AP1	9606.ENSP00000353770	9606.ENSP00000228843	0	0	0	0	0.792	0	0	0.198	0.826
RRM2	SRSF9	9606.ENSP00000353770	9606.ENSP00000229390	0	0	0	0	0.114	0.139	0	0.535	0.615
RRM2	SNRPC	9606.ENSP00000353770	9606.ENSP00000244520	0	0	0	0	0.151	0	0	0.489	0.549
RRM2	NASP	9606.ENSP00000353770	9606.ENSP00000255120	0	0	0	0	0.529	0	0	0.227	0.621
RRM2	LIG1	9606.ENSP00000353770	9606.ENSP00000263274	0	0	0	0	0.58	0	0	0.043	0.581
RRM2	MCM2	9606.ENSP00000353770	9606.ENSP00000265056	0	0	0	0	0.927	0	0	0.485	0.961
RRM2	ANLN	9606.ENSP00000353770	9606.ENSP00000265748	0	0	0	0	0.794	0	0	0.369	0.865
RRM2	TMPO	9606.ENSP00000353770	9606.ENSP00000266732	0	0	0	0	0.553	0	0	0.139	0.599
RRM2	TICRR	9606.ENSP00000353770	9606.ENSP00000268138	0	0	0	0	0.558	0	0	0.141	0.604
RRM2	TPX2	9606.ENSP00000353770	9606.ENSP00000300403	0	0	0	0	0.923	0	0	0.414	0.953
RRM2	CLSPN	9606.ENSP00000353770	9606.ENSP00000312995	0	0	0	0	0.441	0	0	0.294	0.589
RRM2	HNRNPD	9606.ENSP00000353770	9606.ENSP00000313199	0	0	0	0	0.071	0	0	0.542	0.557
RRM2	SKA3	9606.ENSP00000353770	9606.ENSP00000319417	0	0	0	0	0.576	0	0	0	0.576
RRM2	CDCA2	9606.ENSP00000353770	9606.ENSP00000328228	0	0	0	0	0.592	0	0	0.112	0.622
RRM2	ERCC6L	9606.ENSP00000353770	9606.ENSP00000334675	0	0	0	0	0.552	0.056	0	0.125	0.598
RRM2	STMN1	9606.ENSP00000353770	9606.ENSP00000410452	0	0	0	0	0.284	0	0	0.23	0.426
RRM2	SRSF2	9606.ENSP00000353770	9606.ENSP00000376276	0	0	0	0	0.142	0.173	0	0.268	0.435
RRM2	SLBP	9606.ENSP00000353770	9606.ENSP00000417686	0	0	0	0	0.548	0	0	0.293	0.667
RRM2	BRCA1	9606.ENSP00000353770	9606.ENSP00000418960	0	0	0	0	0.409	0	0	0.525	0.708
RRM2	MCM10	9606.ENSP00000353770	9606.ENSP00000418268	0	0	0	0	0.803	0	0	0.473	0.892
RRM2	CDCA3	9606.ENSP00000353770	9606.ENSP00000442068	0	0	0	0	0.861	0	0	0.282	0.896
RRM2	MKI67	9606.ENSP00000353770	9606.ENSP00000357643	0	0	0	0	0.923	0	0	0.596	0.967
RRM2	NUSAP1	9606.ENSP00000353770	9606.ENSP00000453403	0	0	0	0	0.924	0	0	0.595	0.968
RRM2	TOP2A	9606.ENSP00000353770	9606.ENSP00000411532	0	0	0	0	0.935	0	0	0.671	0.978
RRP15	GLTSCR2	9606.ENSP00000355899	9606.ENSP00000246802	0	0	0	0	0.863	0	0	0.229	0.89
RRP15	NUP35	9606.ENSP00000355899	9606.ENSP00000295119	0	0	0	0	0.282	0	0	0.491	0.619
RRP15	RPLP2	9606.ENSP00000355899	9606.ENSP00000322419	0	0	0	0	0.107	0	0	0.424	0.464
RRP15	DDX21	9606.ENSP00000355899	9606.ENSP00000346120	0	0	0	0	0.361	0.16	0	0.101	0.475
RRP15	SREK1IP1	9606.ENSP00000355899	9606.ENSP00000427401	0	0	0	0	0	0	0	0.416	0.416
RRP15	HDGF	9606.ENSP00000355899	9606.ENSP00000357189	0	0	0	0	0.045	0	0	0.463	0.465
RRP15	GPATCH4	9606.ENSP00000355899	9606.ENSP00000396441	0	0	0	0	0.448	0.09	0	0	0.477
RRP15	DKC1	9606.ENSP00000355899	9606.ENSP00000358563	0	0	0	0	0.674	0	0	0.044	0.675
RRP15	NOLC1	9606.ENSP00000355899	9606.ENSP00000385410	0	0	0	0	0.791	0.126	0	0	0.809
RRP15	DNTTIP2	9606.ENSP00000355899	9606.ENSP00000411010	0	0	0	0	0.857	0	0	0	0.857
RRP15	GNL3	9606.ENSP00000355899	9606.ENSP00000395772	0	0	0	0	0.822	0	0	0.245	0.86
RRP15	NOP14	9606.ENSP00000355899	9606.ENSP00000405068	0	0	0	0	0.831	0	0	0.308	0.878
RRP15	FTSJ3	9606.ENSP00000355899	9606.ENSP00000396673	0	0	0	0	0.855	0	0.54	0.251	0.946
RYBP	YAF2	9606.ENSP00000419494	9606.ENSP00000328004	0	0	0	0.932	0	0.632	0.3	0.943	0.748
RYBP	ZEB1	9606.ENSP00000419494	9606.ENSP00000354487	0	0	0	0	0	0	0	0.45	0.45
RYBP	BCOR	9606.ENSP00000419494	9606.ENSP00000367705	0	0	0	0	0	0.887	0	0.927	0.991
RYBP	JMJD1C	9606.ENSP00000419494	9606.ENSP00000382204	0	0	0	0	0	0	0	0.545	0.545
SAFB	SRSF9	9606.ENSP00000467423	9606.ENSP00000229390	0	0	0	0	0.173	0.32	0	0.505	0.698
SAFB	THOC2	9606.ENSP00000467423	9606.ENSP00000245838	0	0	0	0	0.351	0	0	0.188	0.451
SAFB	ACIN1	9606.ENSP00000467423	9606.ENSP00000262710	0	0	0	0	0.287	0.414	0	0.372	0.715
SAFB	HNRNPD	9606.ENSP00000467423	9606.ENSP00000313199	0	0	0	0	0.126	0.344	0	0.497	0.687
SAFB	SRRM1	9606.ENSP00000467423	9606.ENSP00000326261	0	0	0	0	0.221	0.075	0	0.494	0.604
SAFB	TPR	9606.ENSP00000467423	9606.ENSP00000356448	0	0	0	0	0.337	0	0	0.172	0.429
SAFB	SPEN	9606.ENSP00000467423	9606.ENSP00000364912	0	0	0	0	0.066	0	0	0.407	0.422
SAFB	SF1	9606.ENSP00000467423	9606.ENSP00000366604	0	0	0	0	0.388	0.069	0	0.154	0.476
SAFB	SUMO1	9606.ENSP00000467423	9606.ENSP00000376077	0	0	0	0	0.272	0.109	0.8	0.143	0.873
SAFB	SRSF2	9606.ENSP00000467423	9606.ENSP00000376276	0	0	0	0	0.32	0	0	0.509	0.652
SAFB	ZC3H18	9606.ENSP00000467423	9606.ENSP00000416951	0	0	0	0	0.145	0.489	0	0.094	0.569
SAFB	BCLAF1	9606.ENSP00000467423	9606.ENSP00000435210	0	0	0	0	0.304	0	0	0.174	0.4
SAFB	SRSF5	9606.ENSP00000467423	9606.ENSP00000452123	0	0	0	0	0.163	0.172	0	0.207	0.402
SAFB	SRRT	9606.ENSP00000467423	9606.ENSP00000480421	0	0	0	0	0.636	0	0	0.177	0.687
SAMD14	AKAP13	9606.ENSP00000424474	9606.ENSP00000354718	0	0	0	0	0.062	0.074	0	0.448	0.479
SART1	SNRPC	9606.ENSP00000310448	9606.ENSP00000244520	0	0	0	0	0.088	0.828	0	0.472	0.91
SART1	PATL1	9606.ENSP00000310448	9606.ENSP00000300146	0	0	0	0	0.082	0.271	0	0.199	0.418
SART1	SRRM2	9606.ENSP00000310448	9606.ENSP00000301740	0	0	0	0	0.107	0.411	0.9	0.341	0.96
SART1	SUMO1	9606.ENSP00000310448	9606.ENSP00000376077	0	0	0	0	0.068	0.27	0	0.336	0.509
SART1	SRSF2	9606.ENSP00000310448	9606.ENSP00000376276	0	0	0	0	0.101	0	0	0.478	0.511
SART1	RNF4	9606.ENSP00000310448	9606.ENSP00000426503	0	0	0	0	0.053	0.486	0	0.141	0.545
SART1	WAC	9606.ENSP00000310448	9606.ENSP00000346986	0	0	0	0	0.097	0.533	0	0.101	0.588
SART1	SF1	9606.ENSP00000310448	9606.ENSP00000366604	0	0	0	0	0.129	0.352	0	0.429	0.65
SART1	THRAP3	9606.ENSP00000310448	9606.ENSP00000346634	0	0	0	0	0.061	0.655	0	0	0.662
SASH3	BIN2	9606.ENSP00000349359	9606.ENSP00000267012	0	0	0	0	0.35	0	0	0.22	0.471
SCNM1	SNRPC	9606.ENSP00000357901	9606.ENSP00000244520	0	0	0	0	0.092	0	0	0.575	0.597
SCNM1	SPECC1	9606.ENSP00000357901	9606.ENSP00000261503	0	0	0	0	0	0	0	0.486	0.486
SDE2	CCDC12	9606.ENSP00000272091	9606.ENSP00000292314	0	0	0	0	0	0.582	0	0	0.582
SDE2	CWC25	9606.ENSP00000272091	9606.ENSP00000478070	0	0	0	0	0.077	0.59	0	0.666	0.862
SDE2	SRRM2	9606.ENSP00000272091	9606.ENSP00000301740	0	0	0	0	0.045	0.868	0	0	0.868
SERBP1	MED26	9606.ENSP00000360034	9606.ENSP00000263390	0	0	0	0	0	0	0	0.473	0.473
SERBP1	RPLP2	9606.ENSP00000360034	9606.ENSP00000322419	0	0	0	0	0.201	0.955	0	0	0.962
SERBP1	SRRM1	9606.ENSP00000360034	9606.ENSP00000326261	0	0	0	0	0.361	0	0	0.122	0.415
SERBP1	DDX21	9606.ENSP00000360034	9606.ENSP00000346120	0	0	0	0	0.261	0.164	0	0.137	0.421
SERBP1	DKC1	9606.ENSP00000360034	9606.ENSP00000358563	0	0	0	0	0.238	0.27	0	0	0.42
SERBP1	SMNDC1	9606.ENSP00000360034	9606.ENSP00000358616	0	0	0	0	0.159	0.27	0	0.163	0.441
SERBP1	ZRANB2	9606.ENSP00000360034	9606.ENSP00000359958	0	0	0	0	0.212	0.056	0	0.302	0.436
SERBP1	BTF3	9606.ENSP00000360034	9606.ENSP00000369965	0	0	0	0	0.372	0.213	0	0	0.485
SERBP1	PSIP1	9606.ENSP00000360034	9606.ENSP00000370109	0	0	0	0	0.152	0.27	0	0.427	0.614
SERBP1	YBX1	9606.ENSP00000360034	9606.ENSP00000361626	0	0	0	0	0.284	0.426	0	0.15	0.62
SF1	SRSF9	9606.ENSP00000366604	9606.ENSP00000229390	0	0	0	0	0.119	0.212	0	0.557	0.665
SF1	SNRPC	9606.ENSP00000366604	9606.ENSP00000244520	0	0	0	0	0.303	0.16	0	0.774	0.856
SF1	THOC2	9606.ENSP00000366604	9606.ENSP00000245838	0	0	0	0	0.154	0.27	0	0.163	0.438
SF1	ACIN1	9606.ENSP00000366604	9606.ENSP00000262710	0	0	0	0	0.162	0.27	0	0.101	0.402
SF1	PSME3	9606.ENSP00000366604	9606.ENSP00000293362	0	0	0	0	0.247	0	0	0.557	0.652
SF1	SRRM2	9606.ENSP00000366604	9606.ENSP00000301740	0	0	0	0	0.216	0.27	0	0.343	0.591
SF1	SART1	9606.ENSP00000366604	9606.ENSP00000310448	0	0	0	0	0.129	0.352	0	0.429	0.65
SF1	HNRNPD	9606.ENSP00000366604	9606.ENSP00000313199	0	0	0	0	0.164	0.414	0	0.164	0.555
SF1	SRRM1	9606.ENSP00000366604	9606.ENSP00000326261	0	0	0	0	0.345	0	0	0.454	0.627
SF1	RANBP3	9606.ENSP00000366604	9606.ENSP00000341483	0	0	0	0	0.273	0.244	0	0	0.426
SF1	WAC	9606.ENSP00000366604	9606.ENSP00000346986	0	0	0	0	0.105	0.243	0	0.383	0.545
SF1	HNRNPAB	9606.ENSP00000366604	9606.ENSP00000351108	0	0	0	0	0.155	0.414	0	0.11	0.521
SF1	TPR	9606.ENSP00000366604	9606.ENSP00000356448	0	0	0	0	0.289	0.192	0	0.058	0.411
SF1	CWC25	9606.ENSP00000366604	9606.ENSP00000478070	0	0	0	0	0.064	0.057	0	0.387	0.411
SF1	ZC3H11A	9606.ENSP00000366604	9606.ENSP00000438527	0	0	0	0	0.132	0.271	0	0.181	0.436
SF1	CAST	9606.ENSP00000366604	9606.ENSP00000379157	0	0	0	0	0	0	0	0.439	0.439
SF1	SAFB	9606.ENSP00000366604	9606.ENSP00000467423	0	0	0	0	0.388	0.069	0	0.154	0.476
SF1	EIF4B	9606.ENSP00000366604	9606.ENSP00000388806	0	0	0	0	0.102	0.452	0	0.11	0.524
SF1	ZC3H18	9606.ENSP00000366604	9606.ENSP00000416951	0	0	0	0	0.163	0.486	0	0	0.551
SF1	SRRT	9606.ENSP00000366604	9606.ENSP00000480421	0	0	0	0	0.539	0.27	0	0	0.649
SF1	SRSF2	9606.ENSP00000366604	9606.ENSP00000376276	0	0	0	0	0.475	0.105	0	0.506	0.747
SF1	SRSF5	9606.ENSP00000366604	9606.ENSP00000452123	0	0	0	0	0.316	0.423	0	0.46	0.768
SFSWAP	SRRM1	9606.ENSP00000437738	9606.ENSP00000326261	0	0	0	0	0.127	0.532	0	0	0.574
SFSWAP	ERCC6L	9606.ENSP00000437738	9606.ENSP00000334675	0	0	0	0	0.049	0	0	0.539	0.542
SFSWAP	SON	9606.ENSP00000437738	9606.ENSP00000348984	0	0	0	0	0.067	0	0	0.531	0.545
SFSWAP	ZRANB2	9606.ENSP00000437738	9606.ENSP00000359958	0	0	0	0	0.093	0	0	0.634	0.654
SFSWAP	SRSF2	9606.ENSP00000437738	9606.ENSP00000376276	0	0	0	0	0.094	0	0	0.394	0.428
SFSWAP	GTF2F1	9606.ENSP00000437738	9606.ENSP00000377969	0	0	0	0	0.057	0	0	0.736	0.74
SFSWAP	SRSF5	9606.ENSP00000437738	9606.ENSP00000452123	0	0	0	0	0.064	0	0	0.421	0.435
SKA3	BOD1L1	9606.ENSP00000319417	9606.ENSP00000040738	0	0	0	0	0	0	0.54	0.043	0.54
SKA3	RAD51AP1	9606.ENSP00000319417	9606.ENSP00000228843	0	0	0	0	0.572	0	0	0.135	0.614
SKA3	MCM2	9606.ENSP00000319417	9606.ENSP00000265056	0	0	0	0	0.405	0	0	0	0.405
SKA3	ANLN	9606.ENSP00000319417	9606.ENSP00000265748	0	0	0	0	0.543	0	0	0.217	0.627
SKA3	TICRR	9606.ENSP00000319417	9606.ENSP00000268138	0	0	0	0	0.551	0	0	0.134	0.595
SKA3	CENPC	9606.ENSP00000319417	9606.ENSP00000273853	0	0	0	0	0.122	0	0	0.373	0.426
SKA3	TPX2	9606.ENSP00000319417	9606.ENSP00000300403	0	0	0	0	0.832	0	0	0.18	0.857
SKA3	INCENP	9606.ENSP00000319417	9606.ENSP00000378295	0	0	0	0	0.254	0	0	0.295	0.452
SKA3	ERCC6L	9606.ENSP00000319417	9606.ENSP00000334675	0	0	0	0	0.501	0	0	0.14	0.552
SKA3	RRM2	9606.ENSP00000319417	9606.ENSP00000353770	0	0	0	0	0.576	0	0	0	0.576
SKA3	MCM10	9606.ENSP00000319417	9606.ENSP00000418268	0	0	0	0	0.564	0	0	0.086	0.585
SKA3	MKI67	9606.ENSP00000319417	9606.ENSP00000357643	0	0	0	0	0.58	0	0	0.096	0.605
SKA3	NUSAP1	9606.ENSP00000319417	9606.ENSP00000453403	0	0	0	0	0.614	0	0	0.12	0.646
SKA3	CDCA2	9606.ENSP00000319417	9606.ENSP00000328228	0	0	0	0	0.594	0	0	0.422	0.756
SKA3	CDCA3	9606.ENSP00000319417	9606.ENSP00000442068	0	0	0	0	0.745	0	0	0.113	0.764
SKA3	TOP2A	9606.ENSP00000319417	9606.ENSP00000411532	0	0	0	0	0.764	0	0	0.233	0.811
SLBP	SNRPC	9606.ENSP00000417686	9606.ENSP00000244520	0	0	0	0	0.198	0	0	0.462	0.55
SLBP	NASP	9606.ENSP00000417686	9606.ENSP00000255120	0	0	0	0	0.924	0	0	0.828	0.986
SLBP	LIG1	9606.ENSP00000417686	9606.ENSP00000263274	0	0	0	0	0.828	0	0	0	0.828
SLBP	MCM2	9606.ENSP00000417686	9606.ENSP00000265056	0	0	0	0	0.863	0	0	0.347	0.907
SLBP	NUP35	9606.ENSP00000417686	9606.ENSP00000295119	0	0	0	0	0.233	0	0.9	0	0.92
SLBP	PHAX	9606.ENSP00000417686	9606.ENSP00000297540	0	0	0	0	0.146	0	0	0.337	0.409
SLBP	HNRNPD	9606.ENSP00000417686	9606.ENSP00000313199	0	0	0	0	0.159	0	0	0.338	0.42
SLBP	RRM2	9606.ENSP00000417686	9606.ENSP00000353770	0	0	0	0	0.548	0	0	0.293	0.667
SLBP	TPR	9606.ENSP00000417686	9606.ENSP00000356448	0	0	0	0	0.065	0	0.9	0.063	0.904
SLBP	YBX1	9606.ENSP00000417686	9606.ENSP00000361626	0	0	0	0	0.062	0	0.72	0.1	0.742
SLBP	SRRT	9606.ENSP00000417686	9606.ENSP00000480421	0	0	0	0	0.112	0	0	0.477	0.516
SLBP	NUSAP1	9606.ENSP00000417686	9606.ENSP00000453403	0	0	0	0	0.553	0	0	0.23	0.641
SLC16A1	RPLP2	9606.ENSP00000441065	9606.ENSP00000322419	0	0	0	0	0.049	0	0	0.441	0.446
SMNDC1	SRSF9	9606.ENSP00000358616	9606.ENSP00000229390	0	0	0	0	0.07	0.698	0	0.204	0.757
SMNDC1	CFDP1	9606.ENSP00000358616	9606.ENSP00000283882	0	0	0	0	0.761	0	0	0	0.761
SMNDC1	HDGFRP2	9606.ENSP00000358616	9606.ENSP00000483345	0	0	0	0	0.113	0	0	0.372	0.419
SMNDC1	SERBP1	9606.ENSP00000358616	9606.ENSP00000360034	0	0	0	0	0.159	0.27	0	0.163	0.441
SMNDC1	ARPP19	9606.ENSP00000358616	9606.ENSP00000455625	0	0	0	0	0.112	0	0	0.672	0.697
SNRPC	SRSF9	9606.ENSP00000244520	9606.ENSP00000229390	0	0	0	0	0.148	0.252	0	0.23	0.466
SNRPC	TCF12	9606.ENSP00000244520	9606.ENSP00000388940	0	0	0	0	0	0	0	0.436	0.436
SNRPC	SRRM2	9606.ENSP00000244520	9606.ENSP00000301740	0	0	0	0	0.11	0.191	0	0.3	0.453
SNRPC	YBX1	9606.ENSP00000244520	9606.ENSP00000361626	0	0	0	0	0.131	0	0	0.4	0.457
SNRPC	SRSF5	9606.ENSP00000244520	9606.ENSP00000452123	0	0	0	0	0.139	0.252	0	0.227	0.459
SNRPC	THOC2	9606.ENSP00000244520	9606.ENSP00000245838	0	0	0	0	0.126	0.389	0	0.072	0.461
SNRPC	CWC25	9606.ENSP00000244520	9606.ENSP00000478070	0	0	0	0	0	0.056	0	0.521	0.529
SNRPC	RRM2	9606.ENSP00000244520	9606.ENSP00000353770	0	0	0	0	0.151	0	0	0.489	0.549
SNRPC	SLBP	9606.ENSP00000244520	9606.ENSP00000417686	0	0	0	0	0.198	0	0	0.462	0.55
SNRPC	WAC	9606.ENSP00000244520	9606.ENSP00000346986	0	0	0	0	0.091	0.424	0	0.258	0.577
SNRPC	SCNM1	9606.ENSP00000244520	9606.ENSP00000357901	0	0	0	0	0.092	0	0	0.575	0.597
SNRPC	HNRNPD	9606.ENSP00000244520	9606.ENSP00000313199	0	0	0	0	0.108	0.696	0	0.175	0.757
SNRPC	SF1	9606.ENSP00000244520	9606.ENSP00000366604	0	0	0	0	0.303	0.16	0	0.774	0.856
SNRPC	SART1	9606.ENSP00000244520	9606.ENSP00000310448	0	0	0	0	0.088	0.828	0	0.472	0.91
SNRPC	SRSF2	9606.ENSP00000244520	9606.ENSP00000376276	0	0	0	0	0.342	0	0.9	0.345	0.953
SON	CENPC	9606.ENSP00000348984	9606.ENSP00000273853	0	0	0	0	0.059	0.182	0	0.411	0.507
SON	PRRC2C	9606.ENSP00000348984	9606.ENSP00000343629	0	0	0	0	0.615	0	0	0	0.615
SON	SRSF2	9606.ENSP00000348984	9606.ENSP00000376276	0	0	0	0	0.206	0	0	0.327	0.443
SON	PSIP1	9606.ENSP00000348984	9606.ENSP00000370109	0	0	0	0	0.062	0.271	0	0.354	0.519
SON	SFSWAP	9606.ENSP00000348984	9606.ENSP00000437738	0	0	0	0	0.067	0	0	0.531	0.545
SOX6	BCL11A	9606.ENSP00000379644	9606.ENSP00000338774	0	0	0	0	0.066	0.101	0	0.917	0.925
SP3	SUMO1	9606.ENSP00000310301	9606.ENSP00000376077	0	0	0	0	0.133	0.296	0.8	0.223	0.892
SPECC1	ANLN	9606.ENSP00000261503	9606.ENSP00000265748	0	0	0	0	0	0.444	0	0.062	0.456
SPECC1	SCNM1	9606.ENSP00000261503	9606.ENSP00000357901	0	0	0	0	0	0	0	0.486	0.486
SPECC1	PDLIM5	9606.ENSP00000261503	9606.ENSP00000480359	0	0	0	0	0.062	0.149	0.54	0.059	0.608
SPEN	CDK13	9606.ENSP00000364912	9606.ENSP00000181839	0	0	0	0	0.065	0.369	0	0.101	0.423
SPEN	THOC2	9606.ENSP00000364912	9606.ENSP00000245838	0	0	0	0	0.062	0.391	0	0.062	0.417
SPEN	ZC3H13	9606.ENSP00000364912	9606.ENSP00000282007	0	0	0	0	0.105	0.391	0	0.091	0.461
SPEN	KMT2D	9606.ENSP00000364912	9606.ENSP00000301067	0	0	0	0	0.654	0.166	0	0.395	0.81
SPEN	ATRX	9606.ENSP00000364912	9606.ENSP00000362441	0	0	0	0	0.068	0	0	0.639	0.65
SPEN	SAFB	9606.ENSP00000364912	9606.ENSP00000467423	0	0	0	0	0.066	0	0	0.407	0.422
SPEN	SRSF2	9606.ENSP00000364912	9606.ENSP00000376276	0	0	0	0	0	0.301	0	0.35	0.526
SPN	YBX3	9606.ENSP00000353238	9606.ENSP00000228251	0	0	0	0	0	0	0	0.537	0.537
SPN	TCF3	9606.ENSP00000353238	9606.ENSP00000262965	0	0	0	0	0	0	0	0.463	0.463
SPN	CXCR4	9606.ENSP00000353238	9606.ENSP00000386884	0	0	0	0	0.091	0	0	0.458	0.487
SPN	YBX1	9606.ENSP00000353238	9606.ENSP00000361626	0	0	0	0	0	0	0	0.539	0.539
SPN	GYPA	9606.ENSP00000353238	9606.ENSP00000354003	0	0	0	0	0.069	0	0	0.566	0.578
SREK1IP1	RRP15	9606.ENSP00000427401	9606.ENSP00000355899	0	0	0	0	0	0	0	0.416	0.416
SRRM1	SRSF9	9606.ENSP00000326261	9606.ENSP00000229390	0	0	0	0	0.083	0.767	0.6	0.551	0.956
SRRM1	THOC2	9606.ENSP00000326261	9606.ENSP00000245838	0	0	0	0	0.119	0	0.6	0.17	0.682
SRRM1	ACIN1	9606.ENSP00000326261	9606.ENSP00000262710	0	0	0	0	0.318	0.39	0	0.447	0.75
SRRM1	CASC3	9606.ENSP00000326261	9606.ENSP00000264645	0	0	0	0	0.064	0	0.6	0.531	0.809
SRRM1	CCDC12	9606.ENSP00000326261	9606.ENSP00000292314	0	0	0	0	0.065	0	0	0.422	0.436
SRRM1	NUP35	9606.ENSP00000326261	9606.ENSP00000295119	0	0	0	0	0.096	0	0.6	0	0.623
SRRM1	SRRM2	9606.ENSP00000326261	9606.ENSP00000301740	0	0	0	0	0.267	0.936	0.8	0.924	0.999
SRRM1	GTF2F1	9606.ENSP00000326261	9606.ENSP00000377969	0	0	0	0	0.204	0.289	0	0	0.41
SRRM1	SERBP1	9606.ENSP00000326261	9606.ENSP00000360034	0	0	0	0	0.361	0	0	0.122	0.415
SRRM1	BCLAF1	9606.ENSP00000326261	9606.ENSP00000435210	0	0	0	0	0.214	0.075	0	0.274	0.427
SRRM1	CWC25	9606.ENSP00000326261	9606.ENSP00000478070	0	0	0	0	0.138	0	0	0.375	0.438
SRRM1	TOP2A	9606.ENSP00000326261	9606.ENSP00000411532	0	0	0	0	0	0	0	0.442	0.442
SRRM1	NOLC1	9606.ENSP00000326261	9606.ENSP00000385410	0	0	0	0	0.072	0.272	0	0.328	0.506
SRRM1	ZC3H18	9606.ENSP00000326261	9606.ENSP00000416951	0	0	0	0	0.211	0.411	0	0.093	0.541
SRRM1	ZRANB2	9606.ENSP00000326261	9606.ENSP00000359958	0	0	0	0	0.128	0	0	0.507	0.552
SRRM1	SFSWAP	9606.ENSP00000326261	9606.ENSP00000437738	0	0	0	0	0.127	0.532	0	0	0.574
SRRM1	SAFB	9606.ENSP00000326261	9606.ENSP00000467423	0	0	0	0	0.221	0.075	0	0.494	0.604
SRRM1	SF1	9606.ENSP00000326261	9606.ENSP00000366604	0	0	0	0	0.345	0	0	0.454	0.627
SRRM1	FIP1L1	9606.ENSP00000326261	9606.ENSP00000336752	0	0	0	0	0.118	0	0.6	0	0.632
SRRM1	ZC3H11A	9606.ENSP00000326261	9606.ENSP00000438527	0	0	0	0	0.174	0	0.6	0	0.655
SRRM1	THRAP3	9606.ENSP00000326261	9606.ENSP00000346634	0	0	0	0	0.291	0.27	0	0.422	0.674
SRRM1	TPR	9606.ENSP00000326261	9606.ENSP00000356448	0	0	0	0	0.201	0	0.6	0.113	0.691
SRRM1	SRSF5	9606.ENSP00000326261	9606.ENSP00000452123	0	0	0	0	0.149	0.438	0.6	0.664	0.927
SRRM1	SRSF2	9606.ENSP00000326261	9606.ENSP00000376276	0	0	0	0	0.383	0.794	0.6	0.628	0.978
SRRM2	SRSF9	9606.ENSP00000301740	9606.ENSP00000229390	0	0	0	0	0.066	0.184	0	0.483	0.572
SRRM2	SNRPC	9606.ENSP00000301740	9606.ENSP00000244520	0	0	0	0	0.11	0.191	0	0.3	0.453
SRRM2	PPIG	9606.ENSP00000301740	9606.ENSP00000260970	0	0	0	0	0.126	0.826	0	0.099	0.851
SRRM2	ACIN1	9606.ENSP00000301740	9606.ENSP00000262710	0	0	0	0	0.775	0.681	0	0.432	0.955
SRRM2	CASC3	9606.ENSP00000301740	9606.ENSP00000264645	0	0	0	0	0.065	0.8	0	0.367	0.871
SRRM2	SDE2	9606.ENSP00000301740	9606.ENSP00000272091	0	0	0	0	0.045	0.868	0	0	0.868
SRRM2	KMT2D	9606.ENSP00000301740	9606.ENSP00000301067	0	0	0	0	0.836	0	0	0.061	0.839
SRRM2	MYB	9606.ENSP00000301740	9606.ENSP00000339992	0	0	0	0	0.064	0.345	0	0.115	0.41
SRRM2	THRAP3	9606.ENSP00000301740	9606.ENSP00000346634	0	0	0	0	0.128	0	0	0.436	0.488
SRRM2	AKAP12	9606.ENSP00000301740	9606.ENSP00000384537	0	0	0	0	0	0	0	0.508	0.508
SRRM2	SRSF2	9606.ENSP00000301740	9606.ENSP00000376276	0	0	0	0	0.184	0	0	0.463	0.543
SRRM2	SF1	9606.ENSP00000301740	9606.ENSP00000366604	0	0	0	0	0.216	0.27	0	0.343	0.591
SRRM2	ZRANB2	9606.ENSP00000301740	9606.ENSP00000359958	0	0	0	0	0.073	0	0	0.596	0.609
SRRM2	SRSF5	9606.ENSP00000301740	9606.ENSP00000452123	0	0	0	0	0.132	0.56	0	0.607	0.836
SRRM2	ZC3H18	9606.ENSP00000301740	9606.ENSP00000416951	0	0	0	0	0.118	0.823	0	0	0.837
SRRM2	SART1	9606.ENSP00000301740	9606.ENSP00000310448	0	0	0	0	0.107	0.411	0.9	0.341	0.96
SRRM2	CWC25	9606.ENSP00000301740	9606.ENSP00000478070	0	0	0	0	0.084	0.868	0	0.734	0.965
SRRM2	SRRM1	9606.ENSP00000301740	9606.ENSP00000326261	0	0	0	0	0.267	0.936	0.8	0.924	0.999
SRRT	THOC2	9606.ENSP00000480421	9606.ENSP00000245838	0	0	0	0	0.308	0	0	0.539	0.667
SRRT	ACIN1	9606.ENSP00000480421	9606.ENSP00000262710	0	0	0	0	0.26	0	0	0.234	0.41
SRRT	PSME3	9606.ENSP00000480421	9606.ENSP00000293362	0	0	0	0	0.304	0.272	0	0.047	0.474
SRRT	PHAX	9606.ENSP00000480421	9606.ENSP00000297540	0	0	0	0	0.132	0	0.8	0.977	0.995
SRRT	SF1	9606.ENSP00000480421	9606.ENSP00000366604	0	0	0	0	0.539	0.27	0	0	0.649
SRRT	C17orf85	9606.ENSP00000480421	9606.ENSP00000373657	0	0	0	0	0.142	0.477	0	0.727	0.867
SRRT	SUMO1	9606.ENSP00000480421	9606.ENSP00000376077	0	0	0	0	0.318	0.181	0	0.061	0.429
SRRT	SRSF2	9606.ENSP00000480421	9606.ENSP00000376276	0	0	0	0	0.404	0	0	0.164	0.48
SRRT	ZC3H18	9606.ENSP00000480421	9606.ENSP00000416951	0	0	0	0	0.194	0.678	0	0.336	0.812
SRRT	SLBP	9606.ENSP00000480421	9606.ENSP00000417686	0	0	0	0	0.112	0	0	0.477	0.516
SRRT	SAFB	9606.ENSP00000480421	9606.ENSP00000467423	0	0	0	0	0.636	0	0	0.177	0.687
SRSF2	SRSF9	9606.ENSP00000376276	9606.ENSP00000229390	0	0	0	0	0.272	0.884	0.8	0.789	0.996
SRSF2	SNRPC	9606.ENSP00000376276	9606.ENSP00000244520	0	0	0	0	0.342	0	0.9	0.345	0.953
SRSF2	THOC2	9606.ENSP00000376276	9606.ENSP00000245838	0	0	0	0	0.099	0	0.6	0.292	0.722
SRSF2	PPIG	9606.ENSP00000376276	9606.ENSP00000260970	0	0	0	0	0.157	0.078	0	0.309	0.416
SRSF2	CASC3	9606.ENSP00000376276	9606.ENSP00000264645	0	0	0	0	0.063	0	0.6	0.329	0.726
SRSF2	SRRM2	9606.ENSP00000376276	9606.ENSP00000301740	0	0	0	0	0.184	0	0	0.463	0.543
SRSF2	SART1	9606.ENSP00000376276	9606.ENSP00000310448	0	0	0	0	0.101	0	0	0.478	0.511
SRSF2	HNRNPD	9606.ENSP00000376276	9606.ENSP00000313199	0	0	0	0	0.3	0.168	0	0.431	0.64
SRSF2	SRRM1	9606.ENSP00000376276	9606.ENSP00000326261	0	0	0	0	0.383	0.794	0.6	0.628	0.978
SRSF2	HEXIM1	9606.ENSP00000376276	9606.ENSP00000328773	0	0	0	0	0.123	0.343	0	0.516	0.697
SRSF2	FIP1L1	9606.ENSP00000376276	9606.ENSP00000336752	0	0	0	0	0.092	0	0.6	0.273	0.713
SRSF2	PTMA	9606.ENSP00000376276	9606.ENSP00000344547	0	0	0	0	0.212	0.618	0	0	0.686
SRSF2	DDX21	9606.ENSP00000376276	9606.ENSP00000346120	0	0	0	0	0.312	0	0	0.609	0.719
SRSF2	THRAP3	9606.ENSP00000376276	9606.ENSP00000346634	0	0	0	0	0.266	0	0	0.233	0.413
SRSF2	SON	9606.ENSP00000376276	9606.ENSP00000348984	0	0	0	0	0.206	0	0	0.327	0.443
SRSF2	HNRNPAB	9606.ENSP00000376276	9606.ENSP00000351108	0	0	0.291	0	0.285	0.168	0	0.228	0.631
SRSF2	RRM2	9606.ENSP00000376276	9606.ENSP00000353770	0	0	0	0	0.142	0.173	0	0.268	0.435
SRSF2	ZRANB2	9606.ENSP00000376276	9606.ENSP00000359958	0	0	0	0	0.149	0.243	0	0.225	0.458
SRSF2	YBX1	9606.ENSP00000376276	9606.ENSP00000361626	0	0	0	0	0.108	0	0.8	0.358	0.875
SRSF2	SPEN	9606.ENSP00000376276	9606.ENSP00000364912	0	0	0	0	0	0.301	0	0.35	0.526
SRSF2	SF1	9606.ENSP00000376276	9606.ENSP00000366604	0	0	0	0	0.475	0.105	0	0.506	0.747
SRSF2	BCOR	9606.ENSP00000376276	9606.ENSP00000367705	0	0	0	0	0	0	0	0.664	0.664
SRSF2	SFSWAP	9606.ENSP00000376276	9606.ENSP00000437738	0	0	0	0	0.094	0	0	0.394	0.428
SRSF2	BCLAF1	9606.ENSP00000376276	9606.ENSP00000435210	0	0	0	0	0.335	0	0	0.214	0.455
SRSF2	SRRT	9606.ENSP00000376276	9606.ENSP00000480421	0	0	0	0	0.404	0	0	0.164	0.48
SRSF2	ZC3H18	9606.ENSP00000376276	9606.ENSP00000416951	0	0	0	0	0.305	0.27	0	0.107	0.507
SRSF2	TOP2A	9606.ENSP00000376276	9606.ENSP00000411532	0	0	0	0	0.099	0.499	0	0	0.529
SRSF2	TOP2B	9606.ENSP00000376276	9606.ENSP00000396704	0	0	0	0	0.126	0.499	0	0	0.543
SRSF2	SAFB	9606.ENSP00000376276	9606.ENSP00000467423	0	0	0	0	0.32	0	0	0.509	0.652
SRSF2	ZC3H11A	9606.ENSP00000376276	9606.ENSP00000438527	0	0	0	0	0.153	0	0.6	0.201	0.705
SRSF2	GTF2F1	9606.ENSP00000376276	9606.ENSP00000377969	0	0	0	0	0.304	0	0.6	0.082	0.722
SRSF2	SRSF5	9606.ENSP00000376276	9606.ENSP00000452123	0	0	0	0.754	0.289	0.255	0.8	0.884	0.909
SRSF5	SRSF9	9606.ENSP00000452123	9606.ENSP00000229390	0	0	0	0.816	0.09	0.078	0.8	0.827	0.845
SRSF5	SNRPC	9606.ENSP00000452123	9606.ENSP00000244520	0	0	0	0	0.139	0.252	0	0.227	0.459
SRSF5	THOC2	9606.ENSP00000452123	9606.ENSP00000245838	0	0	0	0	0.094	0.103	0.6	0.249	0.723
SRSF5	CASC3	9606.ENSP00000452123	9606.ENSP00000264645	0	0	0	0	0.062	0.185	0.6	0.101	0.688
SRSF5	SRRM2	9606.ENSP00000452123	9606.ENSP00000301740	0	0	0	0	0.132	0.56	0	0.607	0.836
SRSF5	HNRNPD	9606.ENSP00000452123	9606.ENSP00000313199	0	0	0	0	0.143	0.213	0	0.39	0.553
SRSF5	SRRM1	9606.ENSP00000452123	9606.ENSP00000326261	0	0	0	0	0.149	0.438	0.6	0.664	0.927
SRSF5	FIP1L1	9606.ENSP00000452123	9606.ENSP00000336752	0	0	0	0	0.096	0.338	0.6	0.152	0.769
SRSF5	WAC	9606.ENSP00000452123	9606.ENSP00000346986	0	0	0	0	0.092	0.24	0	0.226	0.419
SRSF5	YBX1	9606.ENSP00000452123	9606.ENSP00000361626	0.051	0	0	0	0.11	0.057	0	0.374	0.435
SRSF5	SF1	9606.ENSP00000452123	9606.ENSP00000366604	0	0	0	0	0.316	0.423	0	0.46	0.768
SRSF5	SRSF2	9606.ENSP00000452123	9606.ENSP00000376276	0	0	0	0.754	0.289	0.255	0.8	0.884	0.909
SRSF5	ARGLU1	9606.ENSP00000452123	9606.ENSP00000383059	0	0	0	0	0.249	0.064	0	0.228	0.411
SRSF5	NOLC1	9606.ENSP00000452123	9606.ENSP00000385410	0	0	0	0	0.078	0	0	0.449	0.47
SRSF5	EIF4B	9606.ENSP00000452123	9606.ENSP00000388806	0	0	0	0	0.226	0.213	0	0.111	0.411
SRSF5	SFSWAP	9606.ENSP00000452123	9606.ENSP00000437738	0	0	0	0	0.064	0	0	0.421	0.435
SRSF5	ZC3H11A	9606.ENSP00000452123	9606.ENSP00000438527	0	0	0	0	0.088	0	0.6	0.045	0.621
SRSF5	SAFB	9606.ENSP00000452123	9606.ENSP00000467423	0	0	0	0	0.163	0.172	0	0.207	0.402
SRSF9	EEF1B2	9606.ENSP00000229390	9606.ENSP00000376056	0	0	0	0	0.148	0.271	0	0.113	0.401
SRSF9	GTF2F1	9606.ENSP00000229390	9606.ENSP00000377969	0	0	0	0	0.066	0.386	0	0	0.402
SRSF9	TOP2A	9606.ENSP00000229390	9606.ENSP00000411532	0	0	0	0	0.087	0.39	0	0.059	0.43
SRSF9	TOP2B	9606.ENSP00000229390	9606.ENSP00000396704	0	0	0	0	0.103	0.39	0	0.059	0.44
SRSF9	BCLAF1	9606.ENSP00000229390	9606.ENSP00000435210	0	0	0	0	0.136	0.198	0	0.29	0.465
SRSF9	SNRPC	9606.ENSP00000229390	9606.ENSP00000244520	0	0	0	0	0.148	0.252	0	0.23	0.466
SRSF9	BIN1	9606.ENSP00000229390	9606.ENSP00000316779	0	0	0	0	0	0.086	0	0.445	0.471
SRSF9	HNRNPD	9606.ENSP00000229390	9606.ENSP00000313199	0	0	0	0	0.136	0.182	0	0.328	0.484
SRSF9	SRRM2	9606.ENSP00000229390	9606.ENSP00000301740	0	0	0	0	0.066	0.184	0	0.483	0.572
SRSF9	HNRNPAB	9606.ENSP00000229390	9606.ENSP00000351108	0	0	0	0	0.322	0.182	0	0.31	0.584
SRSF9	RRM2	9606.ENSP00000229390	9606.ENSP00000353770	0	0	0	0	0.114	0.139	0	0.535	0.615
SRSF9	ZC3H11A	9606.ENSP00000229390	9606.ENSP00000438527	0	0	0	0	0.081	0	0.6	0.052	0.621
SRSF9	SF1	9606.ENSP00000229390	9606.ENSP00000366604	0	0	0	0	0.119	0.212	0	0.557	0.665
SRSF9	SAFB	9606.ENSP00000229390	9606.ENSP00000467423	0	0	0	0	0.173	0.32	0	0.505	0.698
SRSF9	THOC2	9606.ENSP00000229390	9606.ENSP00000245838	0	0	0	0	0.165	0.063	0.6	0.172	0.706
SRSF9	SMNDC1	9606.ENSP00000229390	9606.ENSP00000358616	0	0	0	0	0.07	0.698	0	0.204	0.757
SRSF9	YBX1	9606.ENSP00000229390	9606.ENSP00000361626	0.051	0	0	0	0.102	0.473	0	0.555	0.774
SRSF9	FIP1L1	9606.ENSP00000229390	9606.ENSP00000336752	0	0	0	0	0.145	0.338	0.6	0.135	0.777
SRSF9	SRSF5	9606.ENSP00000229390	9606.ENSP00000452123	0	0	0	0.816	0.09	0.078	0.8	0.827	0.845
SRSF9	CASC3	9606.ENSP00000229390	9606.ENSP00000264645	0	0	0	0	0.056	0.7	0.6	0.368	0.918
SRSF9	SRRM1	9606.ENSP00000229390	9606.ENSP00000326261	0	0	0	0	0.083	0.767	0.6	0.551	0.956
SRSF9	SRSF2	9606.ENSP00000229390	9606.ENSP00000376276	0	0	0	0	0.272	0.884	0.8	0.789	0.996
STMN1	HN1L	9606.ENSP00000410452	9606.ENSP00000248098	0	0	0	0	0.043	0.68	0	0	0.68
STMN1	ANLN	9606.ENSP00000410452	9606.ENSP00000265748	0	0	0	0	0.186	0	0	0.413	0.502
STMN1	TPX2	9606.ENSP00000410452	9606.ENSP00000300403	0	0	0	0	0.252	0	0	0.3	0.455
STMN1	HN1	9606.ENSP00000410452	9606.ENSP00000348316	0	0	0	0	0.122	0.621	0	0	0.653
STMN1	MAP2	9606.ENSP00000410452	9606.ENSP00000353508	0	0	0	0	0.062	0.057	0	0.414	0.436
STMN1	RRM2	9606.ENSP00000410452	9606.ENSP00000353770	0	0	0	0	0.284	0	0	0.23	0.426
STMN1	INCENP	9606.ENSP00000410452	9606.ENSP00000378295	0	0	0	0	0.096	0	0	0.497	0.526
STMN1	NUSAP1	9606.ENSP00000410452	9606.ENSP00000453403	0	0	0	0	0.298	0	0	0.333	0.511
STMN1	TOP2A	9606.ENSP00000410452	9606.ENSP00000411532	0	0	0	0	0.31	0	0	0.4	0.569
SUMO1	RIF1	9606.ENSP00000376077	9606.ENSP00000243326	0	0	0	0	0.062	0	0.6	0	0.608
SUMO1	ACIN1	9606.ENSP00000376077	9606.ENSP00000262710	0	0	0	0	0.146	0	0	0.379	0.447
SUMO1	PSME3	9606.ENSP00000376077	9606.ENSP00000293362	0	0	0	0	0.288	0	0	0.217	0.418
SUMO1	NUP35	9606.ENSP00000376077	9606.ENSP00000295119	0	0	0	0	0.132	0	0.6	0.058	0.644
SUMO1	SP3	9606.ENSP00000376077	9606.ENSP00000310301	0	0	0	0	0.133	0.296	0.8	0.223	0.892
SUMO1	SART1	9606.ENSP00000376077	9606.ENSP00000310448	0	0	0	0	0.068	0.27	0	0.336	0.509
SUMO1	RNF168	9606.ENSP00000376077	9606.ENSP00000320898	0	0	0	0	0	0.27	0.8	0.416	0.907
SUMO1	RPLP2	9606.ENSP00000376077	9606.ENSP00000322419	0	0	0	0	0.278	0.161	0	0.163	0.449
SUMO1	BCL11A	9606.ENSP00000376077	9606.ENSP00000338774	0	0	0	0	0	0.143	0	0.408	0.471
SUMO1	MYB	9606.ENSP00000376077	9606.ENSP00000339992	0	0	0	0	0.051	0.27	0	0.314	0.483
SUMO1	ZEB1	9606.ENSP00000376077	9606.ENSP00000354487	0	0	0	0	0	0.105	0.9	0.119	0.914
SUMO1	TPR	9606.ENSP00000376077	9606.ENSP00000356448	0	0	0	0	0.183	0.077	0.6	0.264	0.748
SUMO1	ATRX	9606.ENSP00000376077	9606.ENSP00000362441	0	0	0	0	0.062	0.212	0	0.314	0.448
SUMO1	MDC1	9606.ENSP00000376077	9606.ENSP00000365588	0	0	0	0	0.065	0.222	0.8	0.407	0.902
SUMO1	PSIP1	9606.ENSP00000376077	9606.ENSP00000370109	0	0	0	0	0.065	0.27	0	0.232	0.431
SUMO1	SRRT	9606.ENSP00000376077	9606.ENSP00000480421	0	0	0	0	0.318	0.181	0	0.061	0.429
SUMO1	ATF7IP	9606.ENSP00000376077	9606.ENSP00000440440	0	0	0	0	0	0.135	0	0.415	0.472
SUMO1	RAD23A	9606.ENSP00000376077	9606.ENSP00000467024	0	0	0	0	0.097	0.076	0.6	0.346	0.752
SUMO1	SAFB	9606.ENSP00000376077	9606.ENSP00000467423	0	0	0	0	0.272	0.109	0.8	0.143	0.873
SUMO1	MBD1	9606.ENSP00000376077	9606.ENSP00000468785	0	0	0	0	0	0.27	0.8	0.396	0.904
SUMO1	TOP2B	9606.ENSP00000376077	9606.ENSP00000396704	0	0	0	0	0.068	0.366	0.8	0.346	0.912
SUMO1	INCENP	9606.ENSP00000376077	9606.ENSP00000378295	0	0	0	0	0.067	0	0.9	0.162	0.915
SUMO1	TOP2A	9606.ENSP00000376077	9606.ENSP00000411532	0	0	0	0	0.064	0.382	0.8	0.416	0.923
SUMO1	BRCA1	9606.ENSP00000376077	9606.ENSP00000418960	0	0	0	0	0.062	0.661	0.8	0.547	0.967
SUMO1	RNF4	9606.ENSP00000376077	9606.ENSP00000426503	0	0	0	0	0	0.9	0.9	0.824	0.998
SYNJ1	BIN2	9606.ENSP00000409667	9606.ENSP00000267012	0	0	0	0	0.053	0.104	0.9	0.146	0.917
SYNJ1	BIN1	9606.ENSP00000409667	9606.ENSP00000316779	0	0	0	0	0.053	0.325	0.9	0.548	0.967
SYNJ1	EPS15	9606.ENSP00000409667	9606.ENSP00000360798	0	0	0	0	0.065	0.378	0.9	0.755	0.983
SYNJ1	ATXN2	9606.ENSP00000409667	9606.ENSP00000366843	0	0	0	0	0.063	0	0	0.486	0.498
TAF7	MED26	9606.ENSP00000312709	9606.ENSP00000263390	0	0	0	0	0.065	0.27	0	0.7	0.777
TAF7	C17orf49	9606.ENSP00000312709	9606.ENSP00000448598	0	0	0	0	0	0	0.9	0	0.9
TAF7	TCEA1	9606.ENSP00000312709	9606.ENSP00000428426	0	0	0	0	0.11	0	0.9	0.125	0.915
TAF7	GTF2F1	9606.ENSP00000312709	9606.ENSP00000377969	0	0	0	0	0.156	0	0.9	0.712	0.973
TAL1	TCF3	9606.ENSP00000294339	9606.ENSP00000262965	0	0	0	0	0.062	0.897	0.6	0.988	0.999
TAL1	GYPA	9606.ENSP00000294339	9606.ENSP00000354003	0	0	0	0	0.108	0	0	0.457	0.495
TAL1	BCL11A	9606.ENSP00000294339	9606.ENSP00000338774	0	0	0	0	0.063	0.066	0	0.591	0.611
TAL1	MYB	9606.ENSP00000294339	9606.ENSP00000339992	0	0	0	0	0.062	0.27	0.8	0.75	0.961
TAL1	TCF12	9606.ENSP00000294339	9606.ENSP00000388940	0	0	0	0	0.062	0.883	0.6	0.791	0.989
TCEA1	MED26	9606.ENSP00000428426	9606.ENSP00000263390	0	0	0	0.59	0	0.27	0	0.524	0.42
TCEA1	MCM2	9606.ENSP00000428426	9606.ENSP00000265056	0	0	0	0	0.089	0.27	0	0.225	0.439
TCEA1	TAF7	9606.ENSP00000428426	9606.ENSP00000312709	0	0	0	0	0.11	0	0.9	0.125	0.915
TCEA1	RERE	9606.ENSP00000428426	9606.ENSP00000338629	0	0	0	0	0	0	0	0.413	0.412
TCEA1	BDP1	9606.ENSP00000428426	9606.ENSP00000351575	0	0	0	0	0.062	0.212	0	0.37	0.493
TCEA1	ZNF830	9606.ENSP00000428426	9606.ENSP00000354518	0	0	0	0	0.062	0	0.6	0	0.608
TCEA1	GTF2F1	9606.ENSP00000428426	9606.ENSP00000377969	0	0	0	0	0.062	0.925	0.9	0.51	0.996
TCEA1	EAF1	9606.ENSP00000428426	9606.ENSP00000380054	0	0	0	0	0.062	0.113	0.8	0.226	0.854
TCF12	SNRPC	9606.ENSP00000388940	9606.ENSP00000244520	0	0	0	0	0	0	0	0.436	0.436
TCF12	ATF1	9606.ENSP00000388940	9606.ENSP00000262053	0	0	0	0	0	0	0.6	0.102	0.625
TCF12	TCF3	9606.ENSP00000388940	9606.ENSP00000262965	0	0	0	0.929	0.062	0.478	0.3	0.954	0.652
TCF12	TAL1	9606.ENSP00000388940	9606.ENSP00000294339	0	0	0	0	0.062	0.883	0.6	0.791	0.989
TCF12	HEXIM2	9606.ENSP00000388940	9606.ENSP00000302276	0	0	0	0	0	0.654	0	0	0.654
TCF12	BCL11A	9606.ENSP00000388940	9606.ENSP00000338774	0	0	0	0	0.062	0.058	0	0.462	0.484
TCF12	MYB	9606.ENSP00000388940	9606.ENSP00000339992	0	0	0	0	0.064	0	0.6	0.31	0.719
TCF12	WAC	9606.ENSP00000388940	9606.ENSP00000346986	0	0	0	0	0.127	0	0	0.44	0.49
TCF12	ZEB1	9606.ENSP00000388940	9606.ENSP00000354487	0	0	0	0	0.064	0.388	0	0.507	0.692
TCF12	ZEB2	9606.ENSP00000388940	9606.ENSP00000454157	0	0	0	0	0.063	0.233	0	0.343	0.486
TCF20	RAI1	9606.ENSP00000352463	9606.ENSP00000323074	0	0	0	0.576	0.087	0.647	0	0.598	0.746
TCF20	ATRX	9606.ENSP00000352463	9606.ENSP00000362441	0	0	0	0	0.153	0.153	0	0.258	0.421
TCF20	MDC1	9606.ENSP00000352463	9606.ENSP00000365588	0	0	0	0	0.085	0.468	0	0.44	0.704
TCF20	RNF4	9606.ENSP00000352463	9606.ENSP00000426503	0	0	0	0	0.062	0.486	0	0.716	0.851
TCF3	SPN	9606.ENSP00000262965	9606.ENSP00000353238	0	0	0	0	0	0	0	0.463	0.463
TCF3	BCL11A	9606.ENSP00000262965	9606.ENSP00000338774	0	0	0	0	0	0.058	0	0.464	0.473
TCF3	ZEB2	9606.ENSP00000262965	9606.ENSP00000454157	0	0	0	0	0.062	0.212	0	0.362	0.487
TCF3	FOXO3	9606.ENSP00000262965	9606.ENSP00000385824	0	0	0	0	0.049	0.146	0	0.445	0.511
TCF3	ZEB1	9606.ENSP00000262965	9606.ENSP00000354487	0	0	0	0	0.062	0.212	0	0.411	0.527
TCF3	TCF12	9606.ENSP00000262965	9606.ENSP00000388940	0	0	0	0.929	0.062	0.478	0.3	0.954	0.652
TCF3	MYB	9606.ENSP00000262965	9606.ENSP00000339992	0	0	0	0	0.085	0	0.6	0.422	0.77
TCF3	TAL1	9606.ENSP00000262965	9606.ENSP00000294339	0	0	0	0	0.062	0.897	0.6	0.988	0.999
TCOF1	CCDC86	9606.ENSP00000367028	9606.ENSP00000227520	0	0	0	0	0.131	0	0	0.622	0.658
TCOF1	DKC1	9606.ENSP00000367028	9606.ENSP00000358563	0	0	0	0	0.135	0.27	0	0.453	0.624
TCOF1	PRRC2A	9606.ENSP00000367028	9606.ENSP00000365201	0	0	0	0	0.102	0	0	0.385	0.424
TCOF1	ZC3H18	9606.ENSP00000367028	9606.ENSP00000416951	0	0	0	0	0.376	0.27	0	0	0.525
TCOF1	NOLC1	9606.ENSP00000367028	9606.ENSP00000385410	0	0	0	0.552	0.126	0.633	0	0.905	0.8
THOC2	CDK13	9606.ENSP00000245838	9606.ENSP00000181839	0	0	0	0	0.123	0.346	0	0.14	0.463
THOC2	SRSF9	9606.ENSP00000245838	9606.ENSP00000229390	0	0	0	0	0.165	0.063	0.6	0.172	0.706
THOC2	SNRPC	9606.ENSP00000245838	9606.ENSP00000244520	0	0	0	0	0.126	0.389	0	0.072	0.461
THOC2	SPEN	9606.ENSP00000245838	9606.ENSP00000364912	0	0	0	0	0.062	0.391	0	0.062	0.417
THOC2	SF1	9606.ENSP00000245838	9606.ENSP00000366604	0	0	0	0	0.154	0.27	0	0.163	0.438
THOC2	SAFB	9606.ENSP00000245838	9606.ENSP00000467423	0	0	0	0	0.351	0	0	0.188	0.451
THOC2	PPIG	9606.ENSP00000245838	9606.ENSP00000260970	0	0	0	0	0.525	0.151	0	0	0.579
THOC2	ZC3H18	9606.ENSP00000245838	9606.ENSP00000416951	0	0	0	0	0.098	0.27	0	0.451	0.607
THOC2	CASC3	9606.ENSP00000245838	9606.ENSP00000264645	0	0	0	0	0.062	0	0.6	0.064	0.618
THOC2	BCLAF1	9606.ENSP00000245838	9606.ENSP00000435210	0	0	0	0	0.307	0.479	0	0	0.623
THOC2	AMMECR1	9606.ENSP00000245838	9606.ENSP00000262844	0	0	0	0	0.558	0	0	0.228	0.644
THOC2	SRRT	9606.ENSP00000245838	9606.ENSP00000480421	0	0	0	0	0.308	0	0	0.539	0.667
THOC2	SRRM1	9606.ENSP00000245838	9606.ENSP00000326261	0	0	0	0	0.119	0	0.6	0.17	0.682
THOC2	SRSF2	9606.ENSP00000245838	9606.ENSP00000376276	0	0	0	0	0.099	0	0.6	0.292	0.722
THOC2	SRSF5	9606.ENSP00000245838	9606.ENSP00000452123	0	0	0	0	0.094	0.103	0.6	0.249	0.723
THOC2	FIP1L1	9606.ENSP00000245838	9606.ENSP00000336752	0	0	0	0	0.201	0.115	0.6	0.153	0.728
THOC2	ATRX	9606.ENSP00000245838	9606.ENSP00000362441	0	0	0	0	0.683	0.077	0	0.186	0.741
THOC2	TPR	9606.ENSP00000245838	9606.ENSP00000356448	0	0	0	0	0.546	0	0	0.486	0.756
THOC2	ZC3H11A	9606.ENSP00000245838	9606.ENSP00000438527	0	0	0	0	0.187	0.387	0.6	0.293	0.84
THOC2	C17orf85	9606.ENSP00000245838	9606.ENSP00000373657	0	0	0	0	0.145	0.673	0	0.54	0.86
THRAP3	ACIN1	9606.ENSP00000346634	9606.ENSP00000262710	0	0	0	0	0.105	0.129	0	0.348	0.447
THRAP3	MED26	9606.ENSP00000346634	9606.ENSP00000263390	0	0	0	0	0	0	0.9	0.066	0.902
THRAP3	CASC3	9606.ENSP00000346634	9606.ENSP00000264645	0	0	0	0	0.065	0.27	0	0.301	0.481
THRAP3	ZC3H13	9606.ENSP00000346634	9606.ENSP00000282007	0	0	0	0	0.143	0	0	0.395	0.459
THRAP3	SRRM2	9606.ENSP00000346634	9606.ENSP00000301740	0	0	0	0	0.128	0	0	0.436	0.488
THRAP3	SART1	9606.ENSP00000346634	9606.ENSP00000310448	0	0	0	0	0.061	0.655	0	0	0.662
THRAP3	SRRM1	9606.ENSP00000346634	9606.ENSP00000326261	0	0	0	0	0.291	0.27	0	0.422	0.674
THRAP3	MED19	9606.ENSP00000346634	9606.ENSP00000337340	0	0	0	0	0	0	0.6	0.217	0.673
THRAP3	ZRANB2	9606.ENSP00000346634	9606.ENSP00000359958	0	0	0	0	0.09	0	0	0.377	0.409
THRAP3	SRSF2	9606.ENSP00000346634	9606.ENSP00000376276	0	0	0	0	0.266	0	0	0.233	0.413
THRAP3	BRCA1	9606.ENSP00000346634	9606.ENSP00000418960	0	0	0	0	0.062	0	0	0.477	0.488
THRAP3	ZC3H18	9606.ENSP00000346634	9606.ENSP00000416951	0	0	0	0	0.099	0.27	0	0.391	0.564
THRAP3	BCLAF1	9606.ENSP00000346634	9606.ENSP00000435210	0	0	0	0.806	0.228	0.843	0.54	0.959	0.95
TICRR	MCM2	9606.ENSP00000268138	9606.ENSP00000265056	0	0	0	0	0.342	0	0	0.937	0.958
TICRR	ANLN	9606.ENSP00000268138	9606.ENSP00000265748	0	0	0	0	0.329	0	0	0.241	0.468
TICRR	INCENP	9606.ENSP00000268138	9606.ENSP00000378295	0	0	0	0	0.212	0	0	0.293	0.419
TICRR	SKA3	9606.ENSP00000268138	9606.ENSP00000319417	0	0	0	0	0.551	0	0	0.134	0.595
TICRR	RRM2	9606.ENSP00000268138	9606.ENSP00000353770	0	0	0	0	0.558	0	0	0.141	0.604
TICRR	CDCA2	9606.ENSP00000268138	9606.ENSP00000328228	0	0	0	0	0.554	0	0	0.159	0.609
TICRR	NUSAP1	9606.ENSP00000268138	9606.ENSP00000453403	0	0	0	0	0.56	0	0	0.168	0.619
TICRR	CLSPN	9606.ENSP00000268138	9606.ENSP00000312995	0	0	0	0	0.279	0	0	0.506	0.628
TICRR	TPX2	9606.ENSP00000268138	9606.ENSP00000300403	0	0	0	0	0.565	0	0	0.185	0.63
TICRR	TOP2A	9606.ENSP00000268138	9606.ENSP00000411532	0	0	0	0	0.579	0	0	0.192	0.645
TICRR	MKI67	9606.ENSP00000268138	9606.ENSP00000357643	0	0	0	0	0.734	0.27	0	0.089	0.808
TICRR	MCM10	9606.ENSP00000268138	9606.ENSP00000418268	0	0	0	0	0.565	0	0	0.853	0.933
TMF1	MED19	9606.ENSP00000381567	9606.ENSP00000337340	0	0	0	0	0	0	0	0.402	0.402
TMPO	RAD51AP1	9606.ENSP00000266732	9606.ENSP00000228843	0	0	0	0	0.432	0	0	0.06	0.444
TMPO	ANLN	9606.ENSP00000266732	9606.ENSP00000265748	0	0	0	0	0.349	0.27	0	0.208	0.591
TMPO	RRBP1	9606.ENSP00000266732	9606.ENSP00000367038	0	0	0	0	0	0.471	0	0	0.471
TMPO	HIRIP3	9606.ENSP00000266732	9606.ENSP00000279392	0	0	0	0	0.064	0.246	0	0.321	0.479
TMPO	TPX2	9606.ENSP00000266732	9606.ENSP00000300403	0	0	0	0	0.349	0	0	0.359	0.565
TMPO	TOP2A	9606.ENSP00000266732	9606.ENSP00000411532	0	0	0	0	0.504	0	0	0.178	0.575
TMPO	RRM2	9606.ENSP00000266732	9606.ENSP00000353770	0	0	0	0	0.553	0	0	0.139	0.599
TMPO	RANBP3	9606.ENSP00000266732	9606.ENSP00000341483	0	0	0	0	0.182	0	0	0.558	0.622
TMPO	NUSAP1	9606.ENSP00000266732	9606.ENSP00000453403	0	0	0	0	0.56	0.198	0	0.326	0.741
TMSB4X	PTMA	9606.ENSP00000370010	9606.ENSP00000344547	0	0	0	0	0.063	0	0	0.473	0.485
TNKS1BP1	CEP85	9606.ENSP00000437271	9606.ENSP00000252992	0	0	0	0	0	0.413	0	0	0.412
TNKS1BP1	ANKRD17	9606.ENSP00000437271	9606.ENSP00000351416	0	0	0	0	0	0.408	0	0	0.408
TNKS1BP1	EIF4B	9606.ENSP00000437271	9606.ENSP00000388806	0	0	0	0	0	0	0.9	0	0.9
TNRC6B	KMT2D	9606.ENSP00000401946	9606.ENSP00000301067	0	0	0	0	0.098	0	0.9	0	0.905
TNRC6B	ZNF703	9606.ENSP00000401946	9606.ENSP00000332325	0	0	0	0	0	0	0	0.562	0.562
TNRC6B	FOXO3	9606.ENSP00000401946	9606.ENSP00000385824	0	0	0	0	0	0	0.9	0	0.9
TOP2A	RAD51AP1	9606.ENSP00000411532	9606.ENSP00000228843	0	0	0	0	0.824	0	0	0.525	0.913
TOP2A	SRSF9	9606.ENSP00000411532	9606.ENSP00000229390	0	0	0	0	0.087	0.39	0	0.059	0.43
TOP2A	NASP	9606.ENSP00000411532	9606.ENSP00000255120	0	0	0	0	0.307	0	0	0.302	0.496
TOP2A	LIG1	9606.ENSP00000411532	9606.ENSP00000263274	0	0	0	0	0.434	0.057	0	0.397	0.65
TOP2A	GPBP1	9606.ENSP00000411532	9606.ENSP00000264779	0	0	0	0	0.063	0	0	0.731	0.737
TOP2A	MCM2	9606.ENSP00000411532	9606.ENSP00000265056	0	0	0	0	0.811	0.066	0	0.655	0.934
TOP2A	ANLN	9606.ENSP00000411532	9606.ENSP00000265748	0	0	0	0	0.834	0.27	0	0.469	0.93
TOP2A	TMPO	9606.ENSP00000411532	9606.ENSP00000266732	0	0	0	0	0.504	0	0	0.178	0.575
TOP2A	TICRR	9606.ENSP00000411532	9606.ENSP00000268138	0	0	0	0	0.579	0	0	0.192	0.645
TOP2A	NUP35	9606.ENSP00000411532	9606.ENSP00000295119	0	0	0	0	0.066	0	0.9	0.073	0.905
TOP2A	PATL1	9606.ENSP00000411532	9606.ENSP00000300146	0	0	0	0	0.063	0.331	0	0.142	0.416
TOP2A	TPX2	9606.ENSP00000411532	9606.ENSP00000300403	0	0	0	0	0.993	0	0	0.604	0.997
TOP2A	CLSPN	9606.ENSP00000411532	9606.ENSP00000312995	0	0	0	0	0.759	0	0	0.449	0.862
TOP2A	SKA3	9606.ENSP00000411532	9606.ENSP00000319417	0	0	0	0	0.764	0	0	0.233	0.811
TOP2A	RNF168	9606.ENSP00000411532	9606.ENSP00000320898	0	0	0	0	0	0.27	0	0.312	0.477
TOP2A	SRRM1	9606.ENSP00000411532	9606.ENSP00000326261	0	0	0	0	0	0	0	0.442	0.442
TOP2A	CDCA2	9606.ENSP00000411532	9606.ENSP00000328228	0	0	0	0	0.652	0	0	0.266	0.734
TOP2A	ERCC6L	9606.ENSP00000411532	9606.ENSP00000334675	0	0	0	0	0.583	0.166	0	0.543	0.827
TOP2A	DDX21	9606.ENSP00000411532	9606.ENSP00000346120	0.042	0	0	0	0.158	0.281	0	0.17	0.455
TOP2A	RRM2	9606.ENSP00000411532	9606.ENSP00000353770	0	0	0	0	0.935	0	0	0.671	0.978
TOP2A	TPR	9606.ENSP00000411532	9606.ENSP00000356448	0	0	0	0	0.221	0.146	0.9	0.045	0.928
TOP2A	MKI67	9606.ENSP00000411532	9606.ENSP00000357643	0	0	0	0	0.966	0	0	0.66	0.988
TOP2A	DKC1	9606.ENSP00000411532	9606.ENSP00000358563	0.12	0	0	0	0.16	0.346	0	0.119	0.517
TOP2A	ATRX	9606.ENSP00000411532	9606.ENSP00000362441	0	0	0	0	0.167	0.164	0	0.359	0.515
TOP2A	MDC1	9606.ENSP00000411532	9606.ENSP00000365588	0	0	0	0	0.11	0.107	0	0.9	0.915
TOP2A	SUMO1	9606.ENSP00000411532	9606.ENSP00000376077	0	0	0	0	0.064	0.382	0.8	0.416	0.923
TOP2A	SRSF2	9606.ENSP00000411532	9606.ENSP00000376276	0	0	0	0	0.099	0.499	0	0	0.529
TOP2A	INCENP	9606.ENSP00000411532	9606.ENSP00000378295	0	0	0	0	0.699	0	0	0.264	0.769
TOP2A	FOXO3	9606.ENSP00000411532	9606.ENSP00000385824	0	0	0	0	0.062	0	0	0.457	0.468
TOP2A	TOP2B	9606.ENSP00000411532	9606.ENSP00000396704	0	0	0	0.972	0.062	0.489	0.8	0.805	0.898
TOP2A	STMN1	9606.ENSP00000411532	9606.ENSP00000410452	0	0	0	0	0.31	0	0	0.4	0.569
TOP2A	MCM10	9606.ENSP00000411532	9606.ENSP00000418268	0	0	0	0	0.785	0	0	0.38	0.861
TOP2A	LIN52	9606.ENSP00000411532	9606.ENSP00000451812	0	0	0	0	0	0	0.9	0.064	0.902
TOP2A	BRCA1	9606.ENSP00000411532	9606.ENSP00000418960	0	0	0	0	0.676	0.383	0	0.567	0.906
TOP2A	CDCA3	9606.ENSP00000411532	9606.ENSP00000442068	0	0	0	0	0.943	0	0	0.464	0.968
TOP2A	NUSAP1	9606.ENSP00000411532	9606.ENSP00000453403	0	0	0	0	0.966	0	0	0.649	0.987
TOP2B	SRSF9	9606.ENSP00000396704	9606.ENSP00000229390	0	0	0	0	0.103	0.39	0	0.059	0.44
TOP2B	NASP	9606.ENSP00000396704	9606.ENSP00000255120	0	0	0	0	0.183	0	0	0.475	0.553
TOP2B	LIG1	9606.ENSP00000396704	9606.ENSP00000263274	0	0	0	0	0.348	0.057	0	0.404	0.602
TOP2B	TPX2	9606.ENSP00000396704	9606.ENSP00000300403	0	0	0	0	0.474	0	0	0.074	0.492
TOP2B	ERCC6L	9606.ENSP00000396704	9606.ENSP00000334675	0	0	0	0	0.102	0.164	0	0.274	0.407
TOP2B	ZNF830	9606.ENSP00000396704	9606.ENSP00000354518	0	0	0	0	0	0	0	0.501	0.501
TOP2B	DKC1	9606.ENSP00000396704	9606.ENSP00000358563	0.12	0	0	0	0.065	0.346	0	0.097	0.449
TOP2B	SUMO1	9606.ENSP00000396704	9606.ENSP00000376077	0	0	0	0	0.068	0.366	0.8	0.346	0.912
TOP2B	SRSF2	9606.ENSP00000396704	9606.ENSP00000376276	0	0	0	0	0.126	0.499	0	0	0.543
TOP2B	CDCA3	9606.ENSP00000396704	9606.ENSP00000442068	0	0	0	0	0.456	0	0	0.099	0.488
TOP2B	TOP2A	9606.ENSP00000396704	9606.ENSP00000411532	0	0	0	0.972	0.062	0.489	0.8	0.805	0.898
TPR	THOC2	9606.ENSP00000356448	9606.ENSP00000245838	0	0	0	0	0.546	0	0	0.486	0.756
TPR	CASC3	9606.ENSP00000356448	9606.ENSP00000264645	0	0	0	0	0.082	0	0.6	0	0.617
TPR	ZC3H13	9606.ENSP00000356448	9606.ENSP00000282007	0	0	0	0	0.534	0	0	0.249	0.635
TPR	NUP35	9606.ENSP00000356448	9606.ENSP00000295119	0	0	0	0	0.127	0	0.8	0.505	0.906
TPR	PHAX	9606.ENSP00000356448	9606.ENSP00000297540	0	0	0	0	0.086	0	0.9	0	0.904
TPR	SRRM1	9606.ENSP00000356448	9606.ENSP00000326261	0	0	0	0	0.201	0	0.6	0.113	0.691
TPR	FIP1L1	9606.ENSP00000356448	9606.ENSP00000336752	0	0	0	0	0.219	0.152	0.9	0	0.927
TPR	AHCTF1	9606.ENSP00000356448	9606.ENSP00000355465	0	0	0	0	0.586	0	0	0.719	0.879
TPR	SF1	9606.ENSP00000356448	9606.ENSP00000366604	0	0	0	0	0.289	0.192	0	0.058	0.411
TPR	SAFB	9606.ENSP00000356448	9606.ENSP00000467423	0	0	0	0	0.337	0	0	0.172	0.429
TPR	ATXN2	9606.ENSP00000356448	9606.ENSP00000366843	0	0	0	0	0.354	0.139	0	0.36	0.612
TPR	SUMO1	9606.ENSP00000356448	9606.ENSP00000376077	0	0	0	0	0.183	0.077	0.6	0.264	0.748
TPR	ATRX	9606.ENSP00000356448	9606.ENSP00000362441	0	0	0	0	0.819	0.057	0	0	0.822
TPR	SLBP	9606.ENSP00000356448	9606.ENSP00000417686	0	0	0	0	0.065	0	0.9	0.063	0.904
TPR	INCENP	9606.ENSP00000356448	9606.ENSP00000378295	0	0	0	0	0.082	0	0.9	0.123	0.912
TPR	TOP2A	9606.ENSP00000356448	9606.ENSP00000411532	0	0	0	0	0.221	0.146	0.9	0.045	0.928
TPX2	RAD51AP1	9606.ENSP00000300403	9606.ENSP00000228843	0	0	0	0	0.802	0	0	0.218	0.838
TPX2	MCM2	9606.ENSP00000300403	9606.ENSP00000265056	0	0	0	0	0.791	0	0	0.325	0.853
TPX2	ANLN	9606.ENSP00000300403	9606.ENSP00000265748	0	0	0	0	0.839	0	0	0.482	0.913
TPX2	TMPO	9606.ENSP00000300403	9606.ENSP00000266732	0	0	0	0	0.349	0	0	0.359	0.565
TPX2	TICRR	9606.ENSP00000300403	9606.ENSP00000268138	0	0	0	0	0.565	0	0	0.185	0.63
TPX2	STMN1	9606.ENSP00000300403	9606.ENSP00000410452	0	0	0	0	0.252	0	0	0.3	0.455
TPX2	TOP2B	9606.ENSP00000300403	9606.ENSP00000396704	0	0	0	0	0.474	0	0	0.074	0.492
TPX2	CLSPN	9606.ENSP00000300403	9606.ENSP00000312995	0	0	0	0	0.424	0	0	0.243	0.545
TPX2	CDCA2	9606.ENSP00000300403	9606.ENSP00000328228	0	0	0	0	0.594	0	0	0.216	0.668
TPX2	MDC1	9606.ENSP00000300403	9606.ENSP00000365588	0	0	0	0	0.088	0.391	0	0.456	0.671
TPX2	ERCC6L	9606.ENSP00000300403	9606.ENSP00000334675	0	0	0	0	0.588	0	0	0.241	0.674
TPX2	MCM10	9606.ENSP00000300403	9606.ENSP00000418268	0	0	0	0	0.785	0	0	0.218	0.825
TPX2	SKA3	9606.ENSP00000300403	9606.ENSP00000319417	0	0	0	0	0.832	0	0	0.18	0.857
TPX2	BRCA1	9606.ENSP00000300403	9606.ENSP00000418960	0	0	0	0	0.411	0.682	0	0.514	0.901
TPX2	INCENP	9606.ENSP00000300403	9606.ENSP00000378295	0	0	0	0	0.689	0	0	0.699	0.902
TPX2	CDCA3	9606.ENSP00000300403	9606.ENSP00000442068	0	0	0	0	0.871	0	0	0.345	0.912
TPX2	MKI67	9606.ENSP00000300403	9606.ENSP00000357643	0	0	0	0	0.847	0.27	0	0.4	0.927
TPX2	RRM2	9606.ENSP00000300403	9606.ENSP00000353770	0	0	0	0	0.923	0	0	0.414	0.953
TPX2	NUSAP1	9606.ENSP00000300403	9606.ENSP00000453403	0	0	0	0	0.913	0	0	0.661	0.969
TPX2	TOP2A	9606.ENSP00000300403	9606.ENSP00000411532	0	0	0	0	0.993	0	0	0.604	0.997
UBAP2L	CEP85	9606.ENSP00000389445	9606.ENSP00000252992	0	0	0	0	0	0.249	0	0.28	0.436
UBAP2L	CAPRIN1	9606.ENSP00000389445	9606.ENSP00000340329	0	0	0	0	0.239	0.242	0	0.417	0.634
UBAP2L	PRRC2C	9606.ENSP00000389445	9606.ENSP00000343629	0	0	0	0	0.14	0.292	0	0.253	0.506
UBAP2L	BAG3	9606.ENSP00000389445	9606.ENSP00000358081	0	0	0	0	0.1	0.281	0	0.147	0.4
UBAP2L	YBX1	9606.ENSP00000389445	9606.ENSP00000361626	0	0	0	0	0.18	0.271	0	0.085	0.405
UBAP2L	PRRC2A	9606.ENSP00000389445	9606.ENSP00000365201	0	0	0	0	0.136	0.442	0	0.235	0.599
UBAP2L	GNL3	9606.ENSP00000389445	9606.ENSP00000395772	0	0	0	0	0.048	0	0	0.572	0.575
WAC	SNRPC	9606.ENSP00000346986	9606.ENSP00000244520	0	0	0	0	0.091	0.424	0	0.258	0.577
WAC	SART1	9606.ENSP00000346986	9606.ENSP00000310448	0	0	0	0	0.097	0.533	0	0.101	0.588
WAC	SRSF5	9606.ENSP00000346986	9606.ENSP00000452123	0	0	0	0	0.092	0.24	0	0.226	0.419
WAC	TCF12	9606.ENSP00000346986	9606.ENSP00000388940	0	0	0	0	0.127	0	0	0.44	0.49
WAC	PRRC2A	9606.ENSP00000346986	9606.ENSP00000365201	0	0	0	0	0.074	0	0	0.474	0.492
WAC	SF1	9606.ENSP00000346986	9606.ENSP00000366604	0	0	0	0	0.105	0.243	0	0.383	0.545
WBP11	ZC3H13	9606.ENSP00000261167	9606.ENSP00000282007	0	0	0	0	0.219	0.271	0	0	0.406
WBP11	ZC3H18	9606.ENSP00000261167	9606.ENSP00000416951	0	0	0	0	0.382	0.27	0	0	0.529
WBP11	C17orf85	9606.ENSP00000261167	9606.ENSP00000373657	0	0	0	0	0.113	0	0	0.619	0.648
YAF2	RYBP	9606.ENSP00000328004	9606.ENSP00000419494	0	0	0	0.932	0	0.632	0.3	0.943	0.748
YAF2	BCOR	9606.ENSP00000328004	9606.ENSP00000367705	0	0	0	0	0	0.898	0	0.682	0.966
YBX1	YBX3	9606.ENSP00000361626	9606.ENSP00000228251	0	0	0	0.925	0.12	0.486	0	0.808	0.556
YBX1	SRSF9	9606.ENSP00000361626	9606.ENSP00000229390	0.051	0	0	0	0.102	0.473	0	0.555	0.774
YBX1	SNRPC	9606.ENSP00000361626	9606.ENSP00000244520	0	0	0	0	0.131	0	0	0.4	0.457
YBX1	CPEB4	9606.ENSP00000361626	9606.ENSP00000265085	0	0	0	0	0.062	0.149	0.54	0.076	0.615
YBX1	HNRNPD	9606.ENSP00000361626	9606.ENSP00000313199	0	0	0	0	0.104	0.538	0	0.806	0.913
YBX1	LARP1	9606.ENSP00000361626	9606.ENSP00000336721	0	0	0	0	0.163	0.504	0	0.49	0.77
YBX1	CAPRIN1	9606.ENSP00000361626	9606.ENSP00000340329	0	0	0	0	0.215	0.27	0	0.492	0.684
YBX1	DDX21	9606.ENSP00000361626	9606.ENSP00000346120	0.046	0	0	0	0.122	0.551	0	0.249	0.68
YBX1	HNRNPAB	9606.ENSP00000361626	9606.ENSP00000351108	0	0	0	0	0.184	0.405	0	0.131	0.541
YBX1	SPN	9606.ENSP00000361626	9606.ENSP00000353238	0	0	0	0	0	0	0	0.539	0.539
YBX1	SERBP1	9606.ENSP00000361626	9606.ENSP00000360034	0	0	0	0	0.284	0.426	0	0.15	0.62
YBX1	UBAP2L	9606.ENSP00000361626	9606.ENSP00000389445	0	0	0	0	0.18	0.271	0	0.085	0.405
YBX1	SRSF5	9606.ENSP00000361626	9606.ENSP00000452123	0.051	0	0	0	0.11	0.057	0	0.374	0.435
YBX1	ATXN2	9606.ENSP00000361626	9606.ENSP00000366843	0	0	0	0	0	0.368	0	0.241	0.5
YBX1	BTF3	9606.ENSP00000361626	9606.ENSP00000369965	0	0	0	0	0.47	0.248	0	0.111	0.615
YBX1	GTF2F1	9606.ENSP00000361626	9606.ENSP00000377969	0	0	0	0	0.082	0	0.6	0	0.617
YBX1	SLBP	9606.ENSP00000361626	9606.ENSP00000417686	0	0	0	0	0.062	0	0.72	0.1	0.742
YBX1	NACA	9606.ENSP00000361626	9606.ENSP00000448035	0	0	0	0	0.349	0.79	0	0.052	0.859
YBX1	SRSF2	9606.ENSP00000361626	9606.ENSP00000376276	0	0	0	0	0.108	0	0.8	0.358	0.875
YBX3	CCDC86	9606.ENSP00000228251	9606.ENSP00000227520	0	0	0	0	0	0	0	0.406	0.406
YBX3	SPN	9606.ENSP00000228251	9606.ENSP00000353238	0	0	0	0	0	0	0	0.537	0.537
YBX3	YBX1	9606.ENSP00000228251	9606.ENSP00000361626	0	0	0	0.925	0.12	0.486	0	0.808	0.556
ZC3H11A	SRSF9	9606.ENSP00000438527	9606.ENSP00000229390	0	0	0	0	0.081	0	0.6	0.052	0.621
ZC3H11A	THOC2	9606.ENSP00000438527	9606.ENSP00000245838	0	0	0	0	0.187	0.387	0.6	0.293	0.84
ZC3H11A	CASC3	9606.ENSP00000438527	9606.ENSP00000264645	0	0	0	0	0	0	0.6	0.452	0.771
ZC3H11A	SRRM1	9606.ENSP00000438527	9606.ENSP00000326261	0	0	0	0	0.174	0	0.6	0	0.655
ZC3H11A	FIP1L1	9606.ENSP00000438527	9606.ENSP00000336752	0	0	0	0	0.105	0	0.6	0	0.627
ZC3H11A	PRRC2C	9606.ENSP00000438527	9606.ENSP00000343629	0	0	0	0	0.139	0	0	0.604	0.644
ZC3H11A	ZRANB2	9606.ENSP00000438527	9606.ENSP00000359958	0	0	0	0	0.103	0	0	0.455	0.49
ZC3H11A	SF1	9606.ENSP00000438527	9606.ENSP00000366604	0	0	0	0	0.132	0.271	0	0.181	0.436
ZC3H11A	C17orf85	9606.ENSP00000438527	9606.ENSP00000373657	0	0	0	0	0.109	0.679	0	0	0.701
ZC3H11A	SRSF2	9606.ENSP00000438527	9606.ENSP00000376276	0	0	0	0	0.153	0	0.6	0.201	0.705
ZC3H11A	ZC3H18	9606.ENSP00000438527	9606.ENSP00000416951	0	0	0	0	0.144	0.409	0	0	0.472
ZC3H11A	BCLAF1	9606.ENSP00000438527	9606.ENSP00000435210	0	0	0	0	0.177	0.47	0	0	0.545
ZC3H11A	SRSF5	9606.ENSP00000438527	9606.ENSP00000452123	0	0	0	0	0.088	0	0.6	0.045	0.621
ZC3H13	WBP11	9606.ENSP00000282007	9606.ENSP00000261167	0	0	0	0	0.219	0.271	0	0	0.406
ZC3H13	MED19	9606.ENSP00000282007	9606.ENSP00000337340	0	0	0	0	0	0.27	0	0.289	0.459
ZC3H13	THRAP3	9606.ENSP00000282007	9606.ENSP00000346634	0	0	0	0	0.143	0	0	0.395	0.459
ZC3H13	SPEN	9606.ENSP00000282007	9606.ENSP00000364912	0	0	0	0	0.105	0.391	0	0.091	0.461
ZC3H13	DDX21	9606.ENSP00000282007	9606.ENSP00000346120	0	0	0	0	0.382	0.213	0	0.101	0.525
ZC3H13	ZC3H18	9606.ENSP00000282007	9606.ENSP00000416951	0	0	0	0.547	0.228	0.41	0	0.196	0.56
ZC3H13	TPR	9606.ENSP00000282007	9606.ENSP00000356448	0	0	0	0	0.534	0	0	0.249	0.635
ZC3H13	PRRC2C	9606.ENSP00000282007	9606.ENSP00000343629	0	0	0	0	0.652	0	0	0.067	0.661
ZC3H18	THOC2	9606.ENSP00000416951	9606.ENSP00000245838	0	0	0	0	0.098	0.27	0	0.451	0.607
ZC3H18	ZC3H4	9606.ENSP00000416951	9606.ENSP00000253048	0	0	0	0	0.274	0.27	0	0	0.447
ZC3H18	PPIG	9606.ENSP00000416951	9606.ENSP00000260970	0	0	0	0	0.157	0.413	0	0	0.484
ZC3H18	WBP11	9606.ENSP00000416951	9606.ENSP00000261167	0	0	0	0	0.382	0.27	0	0	0.529
ZC3H18	ACIN1	9606.ENSP00000416951	9606.ENSP00000262710	0	0	0	0	0.129	0.735	0	0	0.759
ZC3H18	FNBP4	9606.ENSP00000416951	9606.ENSP00000263773	0	0	0	0	0.306	0.41	0	0	0.573
ZC3H18	ZC3H13	9606.ENSP00000416951	9606.ENSP00000282007	0	0	0	0.547	0.228	0.41	0	0.196	0.56
ZC3H18	PHAX	9606.ENSP00000416951	9606.ENSP00000297540	0	0	0	0	0.273	0	0	0.392	0.539
ZC3H18	SRRM2	9606.ENSP00000416951	9606.ENSP00000301740	0	0	0	0	0.118	0.823	0	0	0.837
ZC3H18	SRRM1	9606.ENSP00000416951	9606.ENSP00000326261	0	0	0	0	0.211	0.411	0	0.093	0.541
ZC3H18	FIP1L1	9606.ENSP00000416951	9606.ENSP00000336752	0	0	0	0	0.047	0.46	0	0	0.463
ZC3H18	THRAP3	9606.ENSP00000416951	9606.ENSP00000346634	0	0	0	0	0.099	0.27	0	0.391	0.564
ZC3H18	HNRNPAB	9606.ENSP00000416951	9606.ENSP00000351108	0	0	0	0	0.067	0.27	0	0.265	0.456
ZC3H18	SF1	9606.ENSP00000416951	9606.ENSP00000366604	0	0	0	0	0.163	0.486	0	0	0.551
ZC3H18	TCOF1	9606.ENSP00000416951	9606.ENSP00000367028	0	0	0	0	0.376	0.27	0	0	0.525
ZC3H18	PSIP1	9606.ENSP00000416951	9606.ENSP00000370109	0	0	0	0	0.055	0.489	0	0	0.496
ZC3H18	SRSF2	9606.ENSP00000416951	9606.ENSP00000376276	0	0	0	0	0.305	0.27	0	0.107	0.507
ZC3H18	ZC3H11A	9606.ENSP00000416951	9606.ENSP00000438527	0	0	0	0	0.144	0.409	0	0	0.472
ZC3H18	ZNHIT3	9606.ENSP00000416951	9606.ENSP00000484687	0	0	0	0	0	0.27	0	0.337	0.495
ZC3H18	BCLAF1	9606.ENSP00000416951	9606.ENSP00000435210	0	0	0	0	0.113	0.27	0	0.339	0.534
ZC3H18	SAFB	9606.ENSP00000416951	9606.ENSP00000467423	0	0	0	0	0.145	0.489	0	0.094	0.569
ZC3H18	SRRT	9606.ENSP00000416951	9606.ENSP00000480421	0	0	0	0	0.194	0.678	0	0.336	0.812
ZC3H4	ZC3H18	9606.ENSP00000253048	9606.ENSP00000416951	0	0	0	0	0.274	0.27	0	0	0.447
ZC3H4	FIP1L1	9606.ENSP00000253048	9606.ENSP00000336752	0	0	0	0	0.075	0.608	0	0.377	0.754
ZEB1	TCF3	9606.ENSP00000354487	9606.ENSP00000262965	0	0	0	0	0.062	0.212	0	0.411	0.527
ZEB1	BRCA1	9606.ENSP00000354487	9606.ENSP00000418960	0	0	0	0	0	0	0	0.404	0.404
ZEB1	CXCR4	9606.ENSP00000354487	9606.ENSP00000386884	0	0	0	0	0	0	0	0.422	0.422
ZEB1	RYBP	9606.ENSP00000354487	9606.ENSP00000419494	0	0	0	0	0	0	0	0.45	0.45
ZEB1	TCF12	9606.ENSP00000354487	9606.ENSP00000388940	0	0	0	0	0.064	0.388	0	0.507	0.692
ZEB1	ZEB2	9606.ENSP00000354487	9606.ENSP00000454157	0	0	0	0.904	0.084	0	0.8	0.914	0.825
ZEB1	SUMO1	9606.ENSP00000354487	9606.ENSP00000376077	0	0	0	0	0	0.105	0.9	0.119	0.914
ZEB1	FOXO3	9606.ENSP00000354487	9606.ENSP00000385824	0	0	0	0	0	0	0.9	0.342	0.931
ZEB2	TCF3	9606.ENSP00000454157	9606.ENSP00000262965	0	0	0	0	0.062	0.212	0	0.362	0.487
ZEB2	ZEB1	9606.ENSP00000454157	9606.ENSP00000354487	0	0	0	0.904	0.084	0	0.8	0.914	0.825
ZEB2	TCF12	9606.ENSP00000454157	9606.ENSP00000388940	0	0	0	0	0.063	0.233	0	0.343	0.486
ZFAND2B	PSME3	9606.ENSP00000289528	9606.ENSP00000293362	0	0	0	0	0	0.105	0	0.388	0.429
ZFAND2B	PRRC2A	9606.ENSP00000289528	9606.ENSP00000365201	0	0	0	0	0	0.392	0	0.21	0.499
ZNF148	MDC1	9606.ENSP00000353863	9606.ENSP00000365588	0	0	0	0	0	0.471	0	0.054	0.479
ZNF703	TNRC6B	9606.ENSP00000332325	9606.ENSP00000401946	0	0	0	0	0	0	0	0.562	0.562
ZNF830	TOP2B	9606.ENSP00000354518	9606.ENSP00000396704	0	0	0	0	0	0	0	0.501	0.501
ZNF830	TCEA1	9606.ENSP00000354518	9606.ENSP00000428426	0	0	0	0	0.062	0	0.6	0	0.608
ZNHIT3	JMJD1C	9606.ENSP00000484687	9606.ENSP00000382204	0	0	0	0	0	0	0	0.421	0.421
ZNHIT3	ZC3H18	9606.ENSP00000484687	9606.ENSP00000416951	0	0	0	0	0	0.27	0	0.337	0.495
ZRANB2	CASC3	9606.ENSP00000359958	9606.ENSP00000264645	0	0	0	0	0	0	0	0.508	0.508
ZRANB2	SRRM2	9606.ENSP00000359958	9606.ENSP00000301740	0	0	0	0	0.073	0	0	0.596	0.609
ZRANB2	SRRM1	9606.ENSP00000359958	9606.ENSP00000326261	0	0	0	0	0.128	0	0	0.507	0.552
ZRANB2	THRAP3	9606.ENSP00000359958	9606.ENSP00000346634	0	0	0	0	0.09	0	0	0.377	0.409
ZRANB2	SERBP1	9606.ENSP00000359958	9606.ENSP00000360034	0	0	0	0	0.212	0.056	0	0.302	0.436
ZRANB2	SRSF2	9606.ENSP00000359958	9606.ENSP00000376276	0	0	0	0	0.149	0.243	0	0.225	0.458
ZRANB2	ZC3H11A	9606.ENSP00000359958	9606.ENSP00000438527	0	0	0	0	0.103	0	0	0.455	0.49
ZRANB2	BCLAF1	9606.ENSP00000359958	9606.ENSP00000435210	0	0	0	0	0.34	0	0	0.422	0.603
ZRANB2	GTF2F1	9606.ENSP00000359958	9606.ENSP00000377969	0	0	0	0	0.095	0	0	0.613	0.635
ZRANB2	SFSWAP	9606.ENSP00000359958	9606.ENSP00000437738	0	0	0	0	0.093	0	0	0.634	0.654

## Sheet: DOWN in REL_+ CHK1_High
#node1	node2	node1_string_id	node2_string_id	neighborhood_on_chromosome	gene_fusion	phylogenetic_cooccurrence	homology	coexpression	experimentally_determined_interaction	database_annotated	automated_textmining	combined_score
ABCF1	NUFIP2	9606.ENSP00000313603	9606.ENSP00000225388	0	0	0	0	0.079	0	0.72	0.136	0.757
ABCF1	LARP4B	9606.ENSP00000313603	9606.ENSP00000482767	0	0	0	0	0.1	0	0.9	0	0.906
ACIN1	SAFB	9606.ENSP00000262710	9606.ENSP00000467423	0	0	0	0	0.287	0.414	0	0.372	0.715
ACIN1	SRRM1	9606.ENSP00000262710	9606.ENSP00000326261	0	0	0	0	0.318	0.39	0	0.447	0.75
ACIN1	ZC3H18	9606.ENSP00000262710	9606.ENSP00000416951	0	0	0	0	0.129	0.735	0	0	0.759
ACIN1	SRRM2	9606.ENSP00000262710	9606.ENSP00000301740	0	0	0	0	0.775	0.681	0	0.432	0.955
ADD1	ADD2	9606.ENSP00000264758	9606.ENSP00000264436	0	0	0.414	0.922	0.062	0.717	0.8	0.972	0.948
ADD1	DMTN	9606.ENSP00000264758	9606.ENSP00000427866	0	0	0	0	0.083	0.246	0.6	0.607	0.876
ADD2	ADD1	9606.ENSP00000264436	9606.ENSP00000264758	0	0	0.414	0.922	0.062	0.717	0.8	0.972	0.948
ADD2	DMTN	9606.ENSP00000264436	9606.ENSP00000427866	0	0	0	0	0.065	0.394	0.6	0.817	0.952
AHCTF1	MCM2	9606.ENSP00000355465	9606.ENSP00000265056	0	0	0	0	0.072	0	0	0.786	0.793
AHCTF1	NUP35	9606.ENSP00000355465	9606.ENSP00000295119	0	0	0	0	0.081	0.39	0.6	0.826	0.955
AHCTF1	TPR	9606.ENSP00000355465	9606.ENSP00000356448	0	0	0	0	0.586	0	0	0.719	0.879
AKAP12	AKAP13	9606.ENSP00000384537	9606.ENSP00000354718	0	0	0	0	0	0	0	0.758	0.759
AKAP13	AKAP12	9606.ENSP00000354718	9606.ENSP00000384537	0	0	0	0	0	0	0	0.758	0.759
ANLN	RAD51AP1	9606.ENSP00000265748	9606.ENSP00000228843	0	0	0	0	0.778	0	0	0.134	0.799
ANLN	CDCA2	9606.ENSP00000265748	9606.ENSP00000328228	0	0	0	0	0.568	0	0	0.345	0.705
ANLN	MKI67	9606.ENSP00000265748	9606.ENSP00000357643	0	0	0	0	0.59	0.27	0	0.287	0.768
ANLN	INCENP	9606.ENSP00000265748	9606.ENSP00000378295	0	0	0	0	0.589	0.27	0	0.566	0.858
ANLN	RRM2	9606.ENSP00000265748	9606.ENSP00000353770	0	0	0	0	0.794	0	0	0.369	0.865
ANLN	NUSAP1	9606.ENSP00000265748	9606.ENSP00000453403	0	0	0	0	0.811	0	0	0.363	0.874
ANLN	TPX2	9606.ENSP00000265748	9606.ENSP00000300403	0	0	0	0	0.839	0	0	0.482	0.913
ANLN	TOP2A	9606.ENSP00000265748	9606.ENSP00000411532	0	0	0	0	0.834	0.27	0	0.469	0.93
ATF7IP	MBD1	9606.ENSP00000440440	9606.ENSP00000468785	0	0	0	0	0	0.675	0	0.798	0.931
ATRX	THOC2	9606.ENSP00000362441	9606.ENSP00000245838	0	0	0	0	0.683	0.077	0	0.186	0.741
ATRX	PPIG	9606.ENSP00000362441	9606.ENSP00000260970	0	0	0	0	0.254	0.077	0	0.697	0.773
ATRX	BDP1	9606.ENSP00000362441	9606.ENSP00000351575	0	0	0	0	0.826	0.058	0	0.048	0.831
ATRX	TPR	9606.ENSP00000362441	9606.ENSP00000356448	0	0	0	0	0.819	0.057	0	0	0.822
ATRX	BRCA1	9606.ENSP00000362441	9606.ENSP00000418960	0	0	0	0	0.062	0.056	0	0.771	0.78
BCL11A	SOX6	9606.ENSP00000338774	9606.ENSP00000379644	0	0	0	0	0.066	0.101	0	0.917	0.925
BCLAF1	PSME3	9606.ENSP00000435210	9606.ENSP00000293362	0	0	0	0	0.273	0.27	0	0.562	0.747
BCLAF1	THRAP3	9606.ENSP00000435210	9606.ENSP00000346634	0	0	0	0.806	0.228	0.843	0.54	0.959	0.95
BCLAF1	BRCA1	9606.ENSP00000435210	9606.ENSP00000418960	0	0	0	0	0.062	0	0	0.973	0.973
BCOR	YAF2	9606.ENSP00000367705	9606.ENSP00000328004	0	0	0	0	0	0.898	0	0.682	0.966
BCOR	RYBP	9606.ENSP00000367705	9606.ENSP00000419494	0	0	0	0	0	0.887	0	0.927	0.991
BDP1	RIF1	9606.ENSP00000351575	9606.ENSP00000243326	0	0	0	0	0.831	0	0	0	0.831
BDP1	POLR3G	9606.ENSP00000351575	9606.ENSP00000382058	0	0	0	0	0	0	0.6	0.529	0.803
BDP1	ATRX	9606.ENSP00000351575	9606.ENSP00000362441	0	0	0	0	0.826	0.058	0	0.048	0.831
BIN1	BIN2	9606.ENSP00000316779	9606.ENSP00000267012	0	0	0	0.831	0	0.74	0.9	0.878	0.976
BIN1	EPS15	9606.ENSP00000316779	9606.ENSP00000360798	0	0	0	0	0.064	0.246	0.9	0.584	0.966
BIN1	SYNJ1	9606.ENSP00000316779	9606.ENSP00000409667	0	0	0	0	0.053	0.325	0.9	0.548	0.967
BIN2	SYNJ1	9606.ENSP00000267012	9606.ENSP00000409667	0	0	0	0	0.053	0.104	0.9	0.146	0.917
BIN2	EPS15	9606.ENSP00000267012	9606.ENSP00000360798	0	0	0	0	0.064	0.246	0.9	0.251	0.94
BIN2	BIN1	9606.ENSP00000267012	9606.ENSP00000316779	0	0	0	0.831	0	0.74	0.9	0.878	0.976
BRCA1	RAD51AP1	9606.ENSP00000418960	9606.ENSP00000228843	0	0	0	0	0.368	0	0.6	0.459	0.851
BRCA1	RIF1	9606.ENSP00000418960	9606.ENSP00000243326	0	0	0	0	0.092	0.405	0.65	0.298	0.849
BRCA1	TPX2	9606.ENSP00000418960	9606.ENSP00000300403	0	0	0	0	0.411	0.682	0	0.514	0.901
BRCA1	CLSPN	9606.ENSP00000418960	9606.ENSP00000312995	0	0	0	0	0.341	0.487	0.6	0.683	0.951
BRCA1	RNF168	9606.ENSP00000418960	9606.ENSP00000320898	0	0	0	0	0.082	0.647	0.6	0.837	0.976
BRCA1	RRM2	9606.ENSP00000418960	9606.ENSP00000353770	0	0	0	0	0.409	0	0	0.525	0.708
BRCA1	ATRX	9606.ENSP00000418960	9606.ENSP00000362441	0	0	0	0	0.062	0.056	0	0.771	0.78
BRCA1	MDC1	9606.ENSP00000418960	9606.ENSP00000365588	0	0	0	0	0.062	0.873	0.9	0.935	0.999
BRCA1	SUMO1	9606.ENSP00000418960	9606.ENSP00000376077	0	0	0	0	0.062	0.661	0.8	0.547	0.967
BRCA1	CHEK1	9606.ENSP00000418960	9606.ENSP00000388648	0	0	0	0	0.369	0.628	0.6	0.878	0.987
BRCA1	TOP2A	9606.ENSP00000418960	9606.ENSP00000411532	0	0	0	0	0.676	0.383	0	0.567	0.906
BRCA1	MCM10	9606.ENSP00000418960	9606.ENSP00000418268	0	0	0	0	0.567	0.459	0	0.324	0.827
BRCA1	RNF4	9606.ENSP00000418960	9606.ENSP00000426503	0	0	0	0	0	0	0.9	0.469	0.944
BRCA1	BCLAF1	9606.ENSP00000418960	9606.ENSP00000435210	0	0	0	0	0.062	0	0	0.973	0.973
BTF3	RPLP2	9606.ENSP00000369965	9606.ENSP00000322419	0	0	0	0	0.595	0.567	0	0.101	0.828
BTF3	EEF1B2	9606.ENSP00000369965	9606.ENSP00000376056	0	0	0	0	0.62	0.247	0	0.184	0.746
BTF3	NACA	9606.ENSP00000369965	9606.ENSP00000448035	0	0	0	0	0.737	0.987	0.54	0.466	0.999
C17orf49	TAF7	9606.ENSP00000448598	9606.ENSP00000312709	0	0	0	0	0	0	0.9	0	0.9
C17orf85	THOC2	9606.ENSP00000373657	9606.ENSP00000245838	0	0	0	0	0.145	0.673	0	0.54	0.86
C17orf85	ZC3H11A	9606.ENSP00000373657	9606.ENSP00000438527	0	0	0	0	0.109	0.679	0	0	0.701
C17orf85	SRRT	9606.ENSP00000373657	9606.ENSP00000480421	0	0	0	0	0.142	0.477	0	0.727	0.867
CASC3	SRSF9	9606.ENSP00000264645	9606.ENSP00000229390	0	0	0	0	0.056	0.7	0.6	0.368	0.918
CASC3	PPIG	9606.ENSP00000264645	9606.ENSP00000260970	0	0	0	0	0	0.8	0	0.043	0.8
CASC3	SRSF2	9606.ENSP00000264645	9606.ENSP00000376276	0	0	0	0	0.063	0	0.6	0.329	0.726
CASC3	ZC3H11A	9606.ENSP00000264645	9606.ENSP00000438527	0	0	0	0	0	0	0.6	0.452	0.771
CASC3	SRRM1	9606.ENSP00000264645	9606.ENSP00000326261	0	0	0	0	0.064	0	0.6	0.531	0.809
CASC3	SRRM2	9606.ENSP00000264645	9606.ENSP00000301740	0	0	0	0	0.065	0.8	0	0.367	0.871
CASC3	CWC25	9606.ENSP00000264645	9606.ENSP00000478070	0	0	0	0	0	0.8	0.9	0.055	0.979
CDCA2	ANLN	9606.ENSP00000328228	9606.ENSP00000265748	0	0	0	0	0.568	0	0	0.345	0.705
CDCA2	SKA3	9606.ENSP00000328228	9606.ENSP00000319417	0	0	0	0	0.594	0	0	0.422	0.756
CDCA2	MCM10	9606.ENSP00000328228	9606.ENSP00000418268	0	0	0	0	0.55	0	0	0.39	0.714
CDCA2	TOP2A	9606.ENSP00000328228	9606.ENSP00000411532	0	0	0	0	0.652	0	0	0.266	0.734
CDCA2	NUSAP1	9606.ENSP00000328228	9606.ENSP00000453403	0	0	0	0	0.702	0	0	0.403	0.814
CDCA2	CDCA3	9606.ENSP00000328228	9606.ENSP00000442068	0	0	0	0	0.557	0	0	0.609	0.819
CDCA3	TPX2	9606.ENSP00000442068	9606.ENSP00000300403	0	0	0	0	0.871	0	0	0.345	0.912
CDCA3	SKA3	9606.ENSP00000442068	9606.ENSP00000319417	0	0	0	0	0.745	0	0	0.113	0.764
CDCA3	CDCA2	9606.ENSP00000442068	9606.ENSP00000328228	0	0	0	0	0.557	0	0	0.609	0.819
CDCA3	RRM2	9606.ENSP00000442068	9606.ENSP00000353770	0	0	0	0	0.861	0	0	0.282	0.896
CDCA3	MKI67	9606.ENSP00000442068	9606.ENSP00000357643	0	0	0	0	0.728	0	0	0.364	0.82
CDCA3	TOP2A	9606.ENSP00000442068	9606.ENSP00000411532	0	0	0	0	0.943	0	0	0.464	0.968
CDCA3	NUSAP1	9606.ENSP00000442068	9606.ENSP00000453403	0	0	0	0	0.883	0	0	0.511	0.94
CENPC	INCENP	9606.ENSP00000273853	9606.ENSP00000378295	0	0	0	0	0.065	0.161	0	0.717	0.758
CFDP1	SMNDC1	9606.ENSP00000283882	9606.ENSP00000358616	0	0	0	0	0.761	0	0	0	0.761
CHEK1	RAD51AP1	9606.ENSP00000388648	9606.ENSP00000228843	0	0	0	0	0.767	0	0	0.287	0.827
CHEK1	LIG1	9606.ENSP00000388648	9606.ENSP00000263274	0	0	0	0	0.254	0.788	0	0.726	0.953
CHEK1	MCM2	9606.ENSP00000388648	9606.ENSP00000265056	0	0	0	0	0.734	0.4	0.65	0.839	0.989
CHEK1	TICRR	9606.ENSP00000388648	9606.ENSP00000268138	0	0	0	0	0.394	0	0	0.847	0.903
CHEK1	TPX2	9606.ENSP00000388648	9606.ENSP00000300403	0	0	0	0	0.787	0	0	0.194	0.821
CHEK1	CLSPN	9606.ENSP00000388648	9606.ENSP00000312995	0	0	0	0	0.329	0.835	0.9	0.994	0.999
CHEK1	HNRNPD	9606.ENSP00000388648	9606.ENSP00000313199	0	0	0	0	0	0.684	0	0.113	0.707
CHEK1	RRM2	9606.ENSP00000388648	9606.ENSP00000353770	0	0	0	0	0.8	0.137	0	0.649	0.934
CHEK1	MDC1	9606.ENSP00000388648	9606.ENSP00000365588	0	0	0	0	0.081	0.154	0.9	0.793	0.981
CHEK1	NUSAP1	9606.ENSP00000388648	9606.ENSP00000453403	0	0	0	0	0.821	0	0	0.246	0.859
CHEK1	TOP2A	9606.ENSP00000388648	9606.ENSP00000411532	0	0	0	0	0.803	0.205	0	0.678	0.945
CHEK1	MCM10	9606.ENSP00000388648	9606.ENSP00000418268	0	0	0	0	0.794	0	0.65	0.754	0.98
CHEK1	BRCA1	9606.ENSP00000388648	9606.ENSP00000418960	0	0	0	0	0.369	0.628	0.6	0.878	0.987
CLSPN	MCM2	9606.ENSP00000312995	9606.ENSP00000265056	0	0	0	0	0.576	0	0.6	0.714	0.947
CLSPN	TOP2A	9606.ENSP00000312995	9606.ENSP00000411532	0	0	0	0	0.759	0	0	0.449	0.862
CLSPN	BRCA1	9606.ENSP00000312995	9606.ENSP00000418960	0	0	0	0	0.341	0.487	0.6	0.683	0.951
CLSPN	MCM10	9606.ENSP00000312995	9606.ENSP00000418268	0	0	0	0	0.628	0	0.6	0.719	0.954
CLSPN	CHEK1	9606.ENSP00000312995	9606.ENSP00000388648	0	0	0	0	0.329	0.835	0.9	0.994	0.999
CWC25	PPIG	9606.ENSP00000478070	9606.ENSP00000260970	0	0	0	0	0.085	0.8	0	0.087	0.818
CWC25	CASC3	9606.ENSP00000478070	9606.ENSP00000264645	0	0	0	0	0	0.8	0.9	0.055	0.979
CWC25	SDE2	9606.ENSP00000478070	9606.ENSP00000272091	0	0	0	0	0.077	0.59	0	0.666	0.862
CWC25	SRRM2	9606.ENSP00000478070	9606.ENSP00000301740	0	0	0	0	0.084	0.868	0	0.734	0.965
DDX21	GLTSCR2	9606.ENSP00000346120	9606.ENSP00000246802	0	0	0	0	0.839	0.059	0	0.093	0.85
DDX21	SRSF2	9606.ENSP00000346120	9606.ENSP00000376276	0	0	0	0	0.312	0	0	0.609	0.719
DDX21	NOLC1	9606.ENSP00000346120	9606.ENSP00000385410	0	0	0	0	0.611	0.086	0	0.287	0.724
DDX21	GNL3	9606.ENSP00000346120	9606.ENSP00000395772	0	0	0	0	0.559	0.165	0.8	0.356	0.946
DKC1	GLTSCR2	9606.ENSP00000358563	9606.ENSP00000246802	0	0	0	0	0.518	0.769	0	0.365	0.923
DKC1	PSME3	9606.ENSP00000358563	9606.ENSP00000293362	0	0	0	0	0.823	0	0	0	0.823
DKC1	NOL7	9606.ENSP00000358563	9606.ENSP00000405674	0	0	0	0	0.765	0	0	0	0.765
DKC1	NOP14	9606.ENSP00000358563	9606.ENSP00000405068	0	0	0	0	0.819	0	0	0.167	0.843
DKC1	EIF4B	9606.ENSP00000358563	9606.ENSP00000388806	0	0	0	0	0.828	0.092	0	0.119	0.851
DKC1	FTSJ3	9606.ENSP00000358563	9606.ENSP00000396673	0.074	0	0	0	0.861	0.358	0	0.254	0.93
DKC1	GNL3	9606.ENSP00000358563	9606.ENSP00000395772	0	0	0	0	0.913	0.817	0	0.231	0.986
DKC1	NOLC1	9606.ENSP00000358563	9606.ENSP00000385410	0	0	0	0	0.862	0.6	0.36	0.944	0.997
DMTN	ADD2	9606.ENSP00000427866	9606.ENSP00000264436	0	0	0	0	0.065	0.394	0.6	0.817	0.952
DMTN	ADD1	9606.ENSP00000427866	9606.ENSP00000264758	0	0	0	0	0.083	0.246	0.6	0.607	0.876
DNTTIP2	GLTSCR2	9606.ENSP00000411010	9606.ENSP00000246802	0	0	0	0	0.81	0	0	0.151	0.832
DNTTIP2	RRP15	9606.ENSP00000411010	9606.ENSP00000355899	0	0	0	0	0.857	0	0	0	0.857
DNTTIP2	NOP14	9606.ENSP00000411010	9606.ENSP00000405068	0	0	0	0	0.45	0.798	0	0.451	0.933
EAF1	TCEA1	9606.ENSP00000380054	9606.ENSP00000428426	0	0	0	0	0.062	0.113	0.8	0.226	0.854
EEF1B2	RPLP2	9606.ENSP00000376056	9606.ENSP00000322419	0.045	0	0	0	0.95	0.895	0	0.412	0.996
EEF1B2	BTF3	9606.ENSP00000376056	9606.ENSP00000369965	0	0	0	0	0.62	0.247	0	0.184	0.746
EEF1B2	NACA	9606.ENSP00000376056	9606.ENSP00000448035	0	0	0	0	0.654	0.056	0	0.415	0.792
EIF4B	EIF4EBP1	9606.ENSP00000388806	9606.ENSP00000340691	0	0	0	0	0.062	0	0	0.762	0.768
EIF4B	DKC1	9606.ENSP00000388806	9606.ENSP00000358563	0	0	0	0	0.828	0.092	0	0.119	0.851
EIF4B	GNL3	9606.ENSP00000388806	9606.ENSP00000395772	0	0	0	0	0.701	0	0	0.079	0.712
EIF4B	TNKS1BP1	9606.ENSP00000388806	9606.ENSP00000437271	0	0	0	0	0	0	0.9	0	0.9
EIF4EBP1	EIF4B	9606.ENSP00000340691	9606.ENSP00000388806	0	0	0	0	0.062	0	0	0.762	0.768
EIF4ENIF1	PATL1	9606.ENSP00000380659	9606.ENSP00000300146	0	0	0	0	0.096	0.258	0	0.759	0.824
EPS15	BIN2	9606.ENSP00000360798	9606.ENSP00000267012	0	0	0	0	0.064	0.246	0.9	0.251	0.94
EPS15	BIN1	9606.ENSP00000360798	9606.ENSP00000316779	0	0	0	0	0.064	0.246	0.9	0.584	0.966
EPS15	SYNJ1	9606.ENSP00000360798	9606.ENSP00000409667	0	0	0	0	0.065	0.378	0.9	0.755	0.983
ERCC6L	TOP2A	9606.ENSP00000334675	9606.ENSP00000411532	0	0	0	0	0.583	0.166	0	0.543	0.827
ERCC6L	MCM10	9606.ENSP00000334675	9606.ENSP00000418268	0	0	0	0	0.782	0.06	0	0.293	0.842
FIP1L1	SRSF9	9606.ENSP00000336752	9606.ENSP00000229390	0	0	0	0	0.145	0.338	0.6	0.135	0.777
FIP1L1	THOC2	9606.ENSP00000336752	9606.ENSP00000245838	0	0	0	0	0.201	0.115	0.6	0.153	0.728
FIP1L1	ZC3H4	9606.ENSP00000336752	9606.ENSP00000253048	0	0	0	0	0.075	0.608	0	0.377	0.754
FIP1L1	NUP35	9606.ENSP00000336752	9606.ENSP00000295119	0	0	0	0	0.146	0	0.9	0	0.911
FIP1L1	SRSF2	9606.ENSP00000336752	9606.ENSP00000376276	0	0	0	0	0.092	0	0.6	0.273	0.713
FIP1L1	SRSF5	9606.ENSP00000336752	9606.ENSP00000452123	0	0	0	0	0.096	0.338	0.6	0.152	0.769
FIP1L1	TPR	9606.ENSP00000336752	9606.ENSP00000356448	0	0	0	0	0.219	0.152	0.9	0	0.927
FOXO3	ZEB1	9606.ENSP00000385824	9606.ENSP00000354487	0	0	0	0	0	0	0.9	0.342	0.931
FOXO3	TNRC6B	9606.ENSP00000385824	9606.ENSP00000401946	0	0	0	0	0	0	0.9	0	0.9
FTSJ3	GLTSCR2	9606.ENSP00000396673	9606.ENSP00000246802	0	0	0	0	0.879	0.833	0	0.412	0.987
FTSJ3	RRP15	9606.ENSP00000396673	9606.ENSP00000355899	0	0	0	0	0.855	0	0.54	0.251	0.946
FTSJ3	DKC1	9606.ENSP00000396673	9606.ENSP00000358563	0.074	0	0	0	0.861	0.358	0	0.254	0.93
FTSJ3	NOLC1	9606.ENSP00000396673	9606.ENSP00000385410	0	0	0	0	0.859	0	0	0.048	0.86
FTSJ3	GNL3	9606.ENSP00000396673	9606.ENSP00000395772	0	0	0	0	0.817	0.9	0	0.552	0.991
FTSJ3	GPATCH4	9606.ENSP00000396673	9606.ENSP00000396441	0	0	0	0	0.673	0.226	0	0	0.736
FTSJ3	NOP14	9606.ENSP00000396673	9606.ENSP00000405068	0	0	0	0	0.887	0.369	0.9	0	0.992
GLTSCR2	NOLC1	9606.ENSP00000246802	9606.ENSP00000385410	0	0	0	0	0.51	0	0	0.561	0.776
GLTSCR2	DNTTIP2	9606.ENSP00000246802	9606.ENSP00000411010	0	0	0	0	0.81	0	0	0.151	0.832
GLTSCR2	DDX21	9606.ENSP00000246802	9606.ENSP00000346120	0	0	0	0	0.839	0.059	0	0.093	0.85
GLTSCR2	NOP14	9606.ENSP00000246802	9606.ENSP00000405068	0	0	0	0	0.872	0	0	0.105	0.881
GLTSCR2	RRP15	9606.ENSP00000246802	9606.ENSP00000355899	0	0	0	0	0.863	0	0	0.229	0.89
GLTSCR2	GNL3	9606.ENSP00000246802	9606.ENSP00000395772	0	0	0	0	0.639	0.632	0	0.432	0.918
GLTSCR2	DKC1	9606.ENSP00000246802	9606.ENSP00000358563	0	0	0	0	0.518	0.769	0	0.365	0.923
GLTSCR2	FTSJ3	9606.ENSP00000246802	9606.ENSP00000396673	0	0	0	0	0.879	0.833	0	0.412	0.987
GNL3	GLTSCR2	9606.ENSP00000395772	9606.ENSP00000246802	0	0	0	0	0.639	0.632	0	0.432	0.918
GNL3	DDX21	9606.ENSP00000395772	9606.ENSP00000346120	0	0	0	0	0.559	0.165	0.8	0.356	0.946
GNL3	RRP15	9606.ENSP00000395772	9606.ENSP00000355899	0	0	0	0	0.822	0	0	0.245	0.86
GNL3	DKC1	9606.ENSP00000395772	9606.ENSP00000358563	0	0	0	0	0.913	0.817	0	0.231	0.986
GNL3	NOLC1	9606.ENSP00000395772	9606.ENSP00000385410	0	0	0	0	0.824	0	0	0.506	0.909
GNL3	EIF4B	9606.ENSP00000395772	9606.ENSP00000388806	0	0	0	0	0.701	0	0	0.079	0.712
GNL3	NOP14	9606.ENSP00000395772	9606.ENSP00000405068	0	0	0	0	0.816	0.386	0	0.101	0.889
GNL3	FTSJ3	9606.ENSP00000395772	9606.ENSP00000396673	0	0	0	0	0.817	0.9	0	0.552	0.991
GPATCH4	FTSJ3	9606.ENSP00000396441	9606.ENSP00000396673	0	0	0	0	0.673	0.226	0	0	0.736
GPBP1	TOP2A	9606.ENSP00000264779	9606.ENSP00000411532	0	0	0	0	0.063	0	0	0.731	0.737
GTF2F1	TAF7	9606.ENSP00000377969	9606.ENSP00000312709	0	0	0	0	0.156	0	0.9	0.712	0.973
GTF2F1	MYB	9606.ENSP00000377969	9606.ENSP00000339992	0	0	0	0	0.084	0	0.9	0.101	0.91
GTF2F1	SRSF2	9606.ENSP00000377969	9606.ENSP00000376276	0	0	0	0	0.304	0	0.6	0.082	0.722
GTF2F1	SFSWAP	9606.ENSP00000377969	9606.ENSP00000437738	0	0	0	0	0.057	0	0	0.736	0.74
GTF2F1	TCEA1	9606.ENSP00000377969	9606.ENSP00000428426	0	0	0	0	0.062	0.925	0.9	0.51	0.996
HEXIM1	HEXIM2	9606.ENSP00000328773	9606.ENSP00000302276	0	0	0	0.879	0	0.872	0	0.944	0.886
HEXIM2	HEXIM1	9606.ENSP00000302276	9606.ENSP00000328773	0	0	0	0.879	0	0.872	0	0.944	0.886
HNRNPAB	HNRNPD	9606.ENSP00000351108	9606.ENSP00000313199	0	0	0	0.957	0.172	0.848	0	0.457	0.871
HNRNPD	SNRPC	9606.ENSP00000313199	9606.ENSP00000244520	0	0	0	0	0.108	0.696	0	0.175	0.757
HNRNPD	PSME3	9606.ENSP00000313199	9606.ENSP00000293362	0	0	0	0	0.161	0.089	0.9	0.148	0.926
HNRNPD	CHEK1	9606.ENSP00000313199	9606.ENSP00000388648	0	0	0	0	0	0.684	0	0.113	0.707
HNRNPD	HNRNPAB	9606.ENSP00000313199	9606.ENSP00000351108	0	0	0	0.957	0.172	0.848	0	0.457	0.871
HNRNPD	YBX1	9606.ENSP00000313199	9606.ENSP00000361626	0	0	0	0	0.104	0.538	0	0.806	0.913
INCENP	ANLN	9606.ENSP00000378295	9606.ENSP00000265748	0	0	0	0	0.589	0.27	0	0.566	0.858
INCENP	CENPC	9606.ENSP00000378295	9606.ENSP00000273853	0	0	0	0	0.065	0.161	0	0.717	0.758
INCENP	NUP35	9606.ENSP00000378295	9606.ENSP00000295119	0	0	0	0	0.123	0	0.9	0.074	0.911
INCENP	TPX2	9606.ENSP00000378295	9606.ENSP00000300403	0	0	0	0	0.689	0	0	0.699	0.902
INCENP	TPR	9606.ENSP00000378295	9606.ENSP00000356448	0	0	0	0	0.082	0	0.9	0.123	0.912
INCENP	SUMO1	9606.ENSP00000378295	9606.ENSP00000376077	0	0	0	0	0.067	0	0.9	0.162	0.915
INCENP	TOP2A	9606.ENSP00000378295	9606.ENSP00000411532	0	0	0	0	0.699	0	0	0.264	0.769
INCENP	NUSAP1	9606.ENSP00000378295	9606.ENSP00000453403	0	0	0	0	0.926	0	0	0.277	0.944
KMT2D	SPEN	9606.ENSP00000301067	9606.ENSP00000364912	0	0	0	0	0.654	0.166	0	0.395	0.81
KMT2D	SRRM2	9606.ENSP00000301067	9606.ENSP00000301740	0	0	0	0	0.836	0	0	0.061	0.839
KMT2D	TNRC6B	9606.ENSP00000301067	9606.ENSP00000401946	0	0	0	0	0.098	0	0.9	0	0.905
LARP1	YBX1	9606.ENSP00000336721	9606.ENSP00000361626	0	0	0	0	0.163	0.504	0	0.49	0.77
LARP4B	NUFIP2	9606.ENSP00000482767	9606.ENSP00000225388	0	0	0	0	0.105	0	0.72	0	0.738
LARP4B	ABCF1	9606.ENSP00000482767	9606.ENSP00000313603	0	0	0	0	0.1	0	0.9	0	0.906
LIG1	NASP	9606.ENSP00000263274	9606.ENSP00000255120	0	0	0	0	0.84	0	0	0.043	0.84
LIG1	SLBP	9606.ENSP00000263274	9606.ENSP00000417686	0	0	0	0	0.828	0	0	0	0.828
LIG1	RAD23A	9606.ENSP00000263274	9606.ENSP00000467024	0	0	0	0	0.064	0.726	0	0.393	0.83
LIG1	CHEK1	9606.ENSP00000263274	9606.ENSP00000388648	0	0	0	0	0.254	0.788	0	0.726	0.953
LIG1	MCM2	9606.ENSP00000263274	9606.ENSP00000265056	0	0	0	0	0.956	0	0	0.492	0.976
LIN52	TOP2A	9606.ENSP00000451812	9606.ENSP00000411532	0	0	0	0	0	0	0.9	0.064	0.902
MBD1	SUMO1	9606.ENSP00000468785	9606.ENSP00000376077	0	0	0	0	0	0.27	0.8	0.396	0.904
MBD1	ATF7IP	9606.ENSP00000468785	9606.ENSP00000440440	0	0	0	0	0	0.675	0	0.798	0.931
MCM10	RAD51AP1	9606.ENSP00000418268	9606.ENSP00000228843	0	0	0	0	0.783	0	0	0.262	0.833
MCM10	MCM2	9606.ENSP00000418268	9606.ENSP00000265056	0	0	0	0	0.816	0.982	0.6	0.994	0.999
MCM10	TICRR	9606.ENSP00000418268	9606.ENSP00000268138	0	0	0	0	0.565	0	0	0.853	0.933
MCM10	TPX2	9606.ENSP00000418268	9606.ENSP00000300403	0	0	0	0	0.785	0	0	0.218	0.825
MCM10	CLSPN	9606.ENSP00000418268	9606.ENSP00000312995	0	0	0	0	0.628	0	0.6	0.719	0.954
MCM10	CDCA2	9606.ENSP00000418268	9606.ENSP00000328228	0	0	0	0	0.55	0	0	0.39	0.714
MCM10	ERCC6L	9606.ENSP00000418268	9606.ENSP00000334675	0	0	0	0	0.782	0.06	0	0.293	0.842
MCM10	RRM2	9606.ENSP00000418268	9606.ENSP00000353770	0	0	0	0	0.803	0	0	0.473	0.892
MCM10	MKI67	9606.ENSP00000418268	9606.ENSP00000357643	0	0	0	0	0.793	0	0	0.316	0.852
MCM10	CHEK1	9606.ENSP00000418268	9606.ENSP00000388648	0	0	0	0	0.794	0	0.65	0.754	0.98
MCM10	TOP2A	9606.ENSP00000418268	9606.ENSP00000411532	0	0	0	0	0.785	0	0	0.38	0.861
MCM10	BRCA1	9606.ENSP00000418268	9606.ENSP00000418960	0	0	0	0	0.567	0.459	0	0.324	0.827
MCM10	NUSAP1	9606.ENSP00000418268	9606.ENSP00000453403	0	0	0	0	0.785	0	0	0.341	0.852
MCM2	RAD51AP1	9606.ENSP00000265056	9606.ENSP00000228843	0	0	0	0	0.694	0	0	0.331	0.787
MCM2	RIF1	9606.ENSP00000265056	9606.ENSP00000243326	0	0	0	0	0.85	0	0	0.206	0.876
MCM2	NASP	9606.ENSP00000265056	9606.ENSP00000255120	0	0	0	0	0.906	0	0	0.363	0.938
MCM2	LIG1	9606.ENSP00000265056	9606.ENSP00000263274	0	0	0	0	0.956	0	0	0.492	0.976
MCM2	MKI67	9606.ENSP00000265056	9606.ENSP00000357643	0	0	0	0	0.593	0	0	0.407	0.748
MCM2	AHCTF1	9606.ENSP00000265056	9606.ENSP00000355465	0	0	0	0	0.072	0	0	0.786	0.793
MCM2	TPX2	9606.ENSP00000265056	9606.ENSP00000300403	0	0	0	0	0.791	0	0	0.325	0.853
MCM2	NUSAP1	9606.ENSP00000265056	9606.ENSP00000453403	0	0	0	0	0.795	0	0	0.394	0.87
MCM2	SLBP	9606.ENSP00000265056	9606.ENSP00000417686	0	0	0	0	0.863	0	0	0.347	0.907
MCM2	TOP2A	9606.ENSP00000265056	9606.ENSP00000411532	0	0	0	0	0.811	0.066	0	0.655	0.934
MCM2	CLSPN	9606.ENSP00000265056	9606.ENSP00000312995	0	0	0	0	0.576	0	0.6	0.714	0.947
MCM2	TICRR	9606.ENSP00000265056	9606.ENSP00000268138	0	0	0	0	0.342	0	0	0.937	0.958
MCM2	RRM2	9606.ENSP00000265056	9606.ENSP00000353770	0	0	0	0	0.927	0	0	0.485	0.961
MCM2	CHEK1	9606.ENSP00000265056	9606.ENSP00000388648	0	0	0	0	0.734	0.4	0.65	0.839	0.989
MCM2	MCM10	9606.ENSP00000265056	9606.ENSP00000418268	0	0	0	0	0.816	0.982	0.6	0.994	0.999
MDC1	RIF1	9606.ENSP00000365588	9606.ENSP00000243326	0	0	0	0	0.066	0.405	0.6	0.262	0.814
MDC1	RNF168	9606.ENSP00000365588	9606.ENSP00000320898	0	0	0	0	0.053	0.172	0.6	0.864	0.951
MDC1	TCF20	9606.ENSP00000365588	9606.ENSP00000352463	0	0	0	0	0.085	0.468	0	0.44	0.704
MDC1	SUMO1	9606.ENSP00000365588	9606.ENSP00000376077	0	0	0	0	0.065	0.222	0.8	0.407	0.902
MDC1	TOP2A	9606.ENSP00000365588	9606.ENSP00000411532	0	0	0	0	0.11	0.107	0	0.9	0.915
MDC1	CHEK1	9606.ENSP00000365588	9606.ENSP00000388648	0	0	0	0	0.081	0.154	0.9	0.793	0.981
MDC1	RNF4	9606.ENSP00000365588	9606.ENSP00000426503	0	0	0	0	0.062	0.27	0.9	0.812	0.985
MDC1	BRCA1	9606.ENSP00000365588	9606.ENSP00000418960	0	0	0	0	0.062	0.873	0.9	0.935	0.999
MED19	MED26	9606.ENSP00000337340	9606.ENSP00000263390	0	0	0	0	0.076	0.871	0.8	0.831	0.995
MED26	TAF7	9606.ENSP00000263390	9606.ENSP00000312709	0	0	0	0	0.065	0.27	0	0.7	0.777
MED26	THRAP3	9606.ENSP00000263390	9606.ENSP00000346634	0	0	0	0	0	0	0.9	0.066	0.902
MED26	MED19	9606.ENSP00000263390	9606.ENSP00000337340	0	0	0	0	0.076	0.871	0.8	0.831	0.995
MKI67	MCM2	9606.ENSP00000357643	9606.ENSP00000265056	0	0	0	0	0.593	0	0	0.407	0.748
MKI67	ANLN	9606.ENSP00000357643	9606.ENSP00000265748	0	0	0	0	0.59	0.27	0	0.287	0.768
MKI67	TICRR	9606.ENSP00000357643	9606.ENSP00000268138	0	0	0	0	0.734	0.27	0	0.089	0.808
MKI67	TPX2	9606.ENSP00000357643	9606.ENSP00000300403	0	0	0	0	0.847	0.27	0	0.4	0.927
MKI67	RRM2	9606.ENSP00000357643	9606.ENSP00000353770	0	0	0	0	0.923	0	0	0.596	0.967
MKI67	CDCA3	9606.ENSP00000357643	9606.ENSP00000442068	0	0	0	0	0.728	0	0	0.364	0.82
MKI67	MCM10	9606.ENSP00000357643	9606.ENSP00000418268	0	0	0	0	0.793	0	0	0.316	0.852
MKI67	NUSAP1	9606.ENSP00000357643	9606.ENSP00000453403	0	0	0	0	0.964	0	0	0.469	0.98
MKI67	TOP2A	9606.ENSP00000357643	9606.ENSP00000411532	0	0	0	0	0.966	0	0	0.66	0.988
MYB	TCF3	9606.ENSP00000339992	9606.ENSP00000262965	0	0	0	0	0.085	0	0.6	0.422	0.77
MYB	TAL1	9606.ENSP00000339992	9606.ENSP00000294339	0	0	0	0	0.062	0.27	0.8	0.75	0.961
MYB	TCF12	9606.ENSP00000339992	9606.ENSP00000388940	0	0	0	0	0.064	0	0.6	0.31	0.719
MYB	GTF2F1	9606.ENSP00000339992	9606.ENSP00000377969	0	0	0	0	0.084	0	0.9	0.101	0.91
NACA	RPLP2	9606.ENSP00000448035	9606.ENSP00000322419	0	0	0	0	0.877	0	0	0.062	0.88
NACA	YBX1	9606.ENSP00000448035	9606.ENSP00000361626	0	0	0	0	0.349	0.79	0	0.052	0.859
NACA	BTF3	9606.ENSP00000448035	9606.ENSP00000369965	0	0	0	0	0.737	0.987	0.54	0.466	0.999
NACA	EEF1B2	9606.ENSP00000448035	9606.ENSP00000376056	0	0	0	0	0.654	0.056	0	0.415	0.792
NASP	LIG1	9606.ENSP00000255120	9606.ENSP00000263274	0	0	0	0	0.84	0	0	0.043	0.84
NASP	MCM2	9606.ENSP00000255120	9606.ENSP00000265056	0	0	0	0	0.906	0	0	0.363	0.938
NASP	SLBP	9606.ENSP00000255120	9606.ENSP00000417686	0	0	0	0	0.924	0	0	0.828	0.986
NOL7	PSME3	9606.ENSP00000405674	9606.ENSP00000293362	0	0	0	0	0.903	0	0	0.124	0.912
NOL7	DKC1	9606.ENSP00000405674	9606.ENSP00000358563	0	0	0	0	0.765	0	0	0	0.765
NOLC1	GLTSCR2	9606.ENSP00000385410	9606.ENSP00000246802	0	0	0	0	0.51	0	0	0.561	0.776
NOLC1	DDX21	9606.ENSP00000385410	9606.ENSP00000346120	0	0	0	0	0.611	0.086	0	0.287	0.724
NOLC1	RRP15	9606.ENSP00000385410	9606.ENSP00000355899	0	0	0	0	0.791	0.126	0	0	0.809
NOLC1	DKC1	9606.ENSP00000385410	9606.ENSP00000358563	0	0	0	0	0.862	0.6	0.36	0.944	0.997
NOLC1	TCOF1	9606.ENSP00000385410	9606.ENSP00000367028	0	0	0	0.552	0.126	0.633	0	0.905	0.8
NOLC1	NOP14	9606.ENSP00000385410	9606.ENSP00000405068	0	0	0	0	0.7	0	0	0.154	0.735
NOLC1	FTSJ3	9606.ENSP00000385410	9606.ENSP00000396673	0	0	0	0	0.859	0	0	0.048	0.86
NOLC1	GNL3	9606.ENSP00000385410	9606.ENSP00000395772	0	0	0	0	0.824	0	0	0.506	0.909
NOP14	GLTSCR2	9606.ENSP00000405068	9606.ENSP00000246802	0	0	0	0	0.872	0	0	0.105	0.881
NOP14	RRP15	9606.ENSP00000405068	9606.ENSP00000355899	0	0	0	0	0.831	0	0	0.308	0.878
NOP14	DKC1	9606.ENSP00000405068	9606.ENSP00000358563	0	0	0	0	0.819	0	0	0.167	0.843
NOP14	NOLC1	9606.ENSP00000405068	9606.ENSP00000385410	0	0	0	0	0.7	0	0	0.154	0.735
NOP14	GNL3	9606.ENSP00000405068	9606.ENSP00000395772	0	0	0	0	0.816	0.386	0	0.101	0.889
NOP14	FTSJ3	9606.ENSP00000405068	9606.ENSP00000396673	0	0	0	0	0.887	0.369	0.9	0	0.992
NOP14	DNTTIP2	9606.ENSP00000405068	9606.ENSP00000411010	0	0	0	0	0.45	0.798	0	0.451	0.933
NUCKS1	PHAX	9606.ENSP00000356110	9606.ENSP00000297540	0	0	0	0	0.059	0.835	0	0	0.838
NUFIP2	LARP4B	9606.ENSP00000225388	9606.ENSP00000482767	0	0	0	0	0.105	0	0.72	0	0.738
NUFIP2	ABCF1	9606.ENSP00000225388	9606.ENSP00000313603	0	0	0	0	0.079	0	0.72	0.136	0.757
NUP35	TOP2A	9606.ENSP00000295119	9606.ENSP00000411532	0	0	0	0	0.066	0	0.9	0.073	0.905
NUP35	PHAX	9606.ENSP00000295119	9606.ENSP00000297540	0	0	0	0	0.092	0	0.9	0	0.905
NUP35	TPR	9606.ENSP00000295119	9606.ENSP00000356448	0	0	0	0	0.127	0	0.8	0.505	0.906
NUP35	FIP1L1	9606.ENSP00000295119	9606.ENSP00000336752	0	0	0	0	0.146	0	0.9	0	0.911
NUP35	INCENP	9606.ENSP00000295119	9606.ENSP00000378295	0	0	0	0	0.123	0	0.9	0.074	0.911
NUP35	SLBP	9606.ENSP00000295119	9606.ENSP00000417686	0	0	0	0	0.233	0	0.9	0	0.92
NUP35	AHCTF1	9606.ENSP00000295119	9606.ENSP00000355465	0	0	0	0	0.081	0.39	0.6	0.826	0.955
NUSAP1	RAD51AP1	9606.ENSP00000453403	9606.ENSP00000228843	0	0	0	0	0.796	0	0	0.352	0.862
NUSAP1	MCM2	9606.ENSP00000453403	9606.ENSP00000265056	0	0	0	0	0.795	0	0	0.394	0.87
NUSAP1	ANLN	9606.ENSP00000453403	9606.ENSP00000265748	0	0	0	0	0.811	0	0	0.363	0.874
NUSAP1	TMPO	9606.ENSP00000453403	9606.ENSP00000266732	0	0	0	0	0.56	0.198	0	0.326	0.741
NUSAP1	TPX2	9606.ENSP00000453403	9606.ENSP00000300403	0	0	0	0	0.913	0	0	0.661	0.969
NUSAP1	CDCA2	9606.ENSP00000453403	9606.ENSP00000328228	0	0	0	0	0.702	0	0	0.403	0.814
NUSAP1	RRM2	9606.ENSP00000453403	9606.ENSP00000353770	0	0	0	0	0.924	0	0	0.595	0.968
NUSAP1	MKI67	9606.ENSP00000453403	9606.ENSP00000357643	0	0	0	0	0.964	0	0	0.469	0.98
NUSAP1	INCENP	9606.ENSP00000453403	9606.ENSP00000378295	0	0	0	0	0.926	0	0	0.277	0.944
NUSAP1	CHEK1	9606.ENSP00000453403	9606.ENSP00000388648	0	0	0	0	0.821	0	0	0.246	0.859
NUSAP1	TOP2A	9606.ENSP00000453403	9606.ENSP00000411532	0	0	0	0	0.966	0	0	0.649	0.987
NUSAP1	MCM10	9606.ENSP00000453403	9606.ENSP00000418268	0	0	0	0	0.785	0	0	0.341	0.852
NUSAP1	CDCA3	9606.ENSP00000453403	9606.ENSP00000442068	0	0	0	0	0.883	0	0	0.511	0.94
PATL1	EIF4ENIF1	9606.ENSP00000300146	9606.ENSP00000380659	0	0	0	0	0.096	0.258	0	0.759	0.824
PHAX	NUP35	9606.ENSP00000297540	9606.ENSP00000295119	0	0	0	0	0.092	0	0.9	0	0.905
PHAX	NUCKS1	9606.ENSP00000297540	9606.ENSP00000356110	0	0	0	0	0.059	0.835	0	0	0.838
PHAX	TPR	9606.ENSP00000297540	9606.ENSP00000356448	0	0	0	0	0.086	0	0.9	0	0.904
PHAX	SRRT	9606.ENSP00000297540	9606.ENSP00000480421	0	0	0	0	0.132	0	0.8	0.977	0.995
POLR3G	BDP1	9606.ENSP00000382058	9606.ENSP00000351575	0	0	0	0	0	0	0.6	0.529	0.803
PPIG	ATRX	9606.ENSP00000260970	9606.ENSP00000362441	0	0	0	0	0.254	0.077	0	0.697	0.773
PPIG	CASC3	9606.ENSP00000260970	9606.ENSP00000264645	0	0	0	0	0	0.8	0	0.043	0.8
PPIG	CWC25	9606.ENSP00000260970	9606.ENSP00000478070	0	0	0	0	0.085	0.8	0	0.087	0.818
PPIG	SRRM2	9606.ENSP00000260970	9606.ENSP00000301740	0	0	0	0	0.126	0.826	0	0.099	0.851
PSME3	BCLAF1	9606.ENSP00000293362	9606.ENSP00000435210	0	0	0	0	0.273	0.27	0	0.562	0.747
PSME3	DKC1	9606.ENSP00000293362	9606.ENSP00000358563	0	0	0	0	0.823	0	0	0	0.823
PSME3	NOL7	9606.ENSP00000293362	9606.ENSP00000405674	0	0	0	0	0.903	0	0	0.124	0.912
PSME3	HNRNPD	9606.ENSP00000293362	9606.ENSP00000313199	0	0	0	0	0.161	0.089	0.9	0.148	0.926
RAD23A	LIG1	9606.ENSP00000467024	9606.ENSP00000263274	0	0	0	0	0.064	0.726	0	0.393	0.83
RAD23A	SUMO1	9606.ENSP00000467024	9606.ENSP00000376077	0	0	0	0	0.097	0.076	0.6	0.346	0.752
RAD51AP1	MCM2	9606.ENSP00000228843	9606.ENSP00000265056	0	0	0	0	0.694	0	0	0.331	0.787
RAD51AP1	ANLN	9606.ENSP00000228843	9606.ENSP00000265748	0	0	0	0	0.778	0	0	0.134	0.799
RAD51AP1	RRM2	9606.ENSP00000228843	9606.ENSP00000353770	0	0	0	0	0.792	0	0	0.198	0.826
RAD51AP1	CHEK1	9606.ENSP00000228843	9606.ENSP00000388648	0	0	0	0	0.767	0	0	0.287	0.827
RAD51AP1	MCM10	9606.ENSP00000228843	9606.ENSP00000418268	0	0	0	0	0.783	0	0	0.262	0.833
RAD51AP1	TPX2	9606.ENSP00000228843	9606.ENSP00000300403	0	0	0	0	0.802	0	0	0.218	0.838
RAD51AP1	BRCA1	9606.ENSP00000228843	9606.ENSP00000418960	0	0	0	0	0.368	0	0.6	0.459	0.851
RAD51AP1	NUSAP1	9606.ENSP00000228843	9606.ENSP00000453403	0	0	0	0	0.796	0	0	0.352	0.862
RAD51AP1	TOP2A	9606.ENSP00000228843	9606.ENSP00000411532	0	0	0	0	0.824	0	0	0.525	0.913
RAI1	TCF20	9606.ENSP00000323074	9606.ENSP00000352463	0	0	0	0.576	0.087	0.647	0	0.598	0.746
RIF1	RNF168	9606.ENSP00000243326	9606.ENSP00000320898	0	0	0	0	0.091	0	0.6	0.305	0.725
RIF1	MDC1	9606.ENSP00000243326	9606.ENSP00000365588	0	0	0	0	0.066	0.405	0.6	0.262	0.814
RIF1	BDP1	9606.ENSP00000243326	9606.ENSP00000351575	0	0	0	0	0.831	0	0	0	0.831
RIF1	BRCA1	9606.ENSP00000243326	9606.ENSP00000418960	0	0	0	0	0.092	0.405	0.65	0.298	0.849
RIF1	MCM2	9606.ENSP00000243326	9606.ENSP00000265056	0	0	0	0	0.85	0	0	0.206	0.876
RNF168	RIF1	9606.ENSP00000320898	9606.ENSP00000243326	0	0	0	0	0.091	0	0.6	0.305	0.725
RNF168	SUMO1	9606.ENSP00000320898	9606.ENSP00000376077	0	0	0	0	0	0.27	0.8	0.416	0.907
RNF168	MDC1	9606.ENSP00000320898	9606.ENSP00000365588	0	0	0	0	0.053	0.172	0.6	0.864	0.951
RNF168	RNF4	9606.ENSP00000320898	9606.ENSP00000426503	0	0	0	0	0.064	0.27	0.9	0.518	0.962
RNF168	BRCA1	9606.ENSP00000320898	9606.ENSP00000418960	0	0	0	0	0.082	0.647	0.6	0.837	0.976
RNF4	RNF168	9606.ENSP00000426503	9606.ENSP00000320898	0	0	0	0	0.064	0.27	0.9	0.518	0.962
RNF4	TCF20	9606.ENSP00000426503	9606.ENSP00000352463	0	0	0	0	0.062	0.486	0	0.716	0.851
RNF4	MDC1	9606.ENSP00000426503	9606.ENSP00000365588	0	0	0	0	0.062	0.27	0.9	0.812	0.985
RNF4	SUMO1	9606.ENSP00000426503	9606.ENSP00000376077	0	0	0	0	0	0.9	0.9	0.824	0.998
RNF4	BRCA1	9606.ENSP00000426503	9606.ENSP00000418960	0	0	0	0	0	0	0.9	0.469	0.944
RPLP2	BTF3	9606.ENSP00000322419	9606.ENSP00000369965	0	0	0	0	0.595	0.567	0	0.101	0.828
RPLP2	NACA	9606.ENSP00000322419	9606.ENSP00000448035	0	0	0	0	0.877	0	0	0.062	0.88
RPLP2	SERBP1	9606.ENSP00000322419	9606.ENSP00000360034	0	0	0	0	0.201	0.955	0	0	0.962
RPLP2	EEF1B2	9606.ENSP00000322419	9606.ENSP00000376056	0.045	0	0	0	0.95	0.895	0	0.412	0.996
RRM2	RAD51AP1	9606.ENSP00000353770	9606.ENSP00000228843	0	0	0	0	0.792	0	0	0.198	0.826
RRM2	MCM2	9606.ENSP00000353770	9606.ENSP00000265056	0	0	0	0	0.927	0	0	0.485	0.961
RRM2	ANLN	9606.ENSP00000353770	9606.ENSP00000265748	0	0	0	0	0.794	0	0	0.369	0.865
RRM2	TPX2	9606.ENSP00000353770	9606.ENSP00000300403	0	0	0	0	0.923	0	0	0.414	0.953
RRM2	BRCA1	9606.ENSP00000353770	9606.ENSP00000418960	0	0	0	0	0.409	0	0	0.525	0.708
RRM2	MCM10	9606.ENSP00000353770	9606.ENSP00000418268	0	0	0	0	0.803	0	0	0.473	0.892
RRM2	CDCA3	9606.ENSP00000353770	9606.ENSP00000442068	0	0	0	0	0.861	0	0	0.282	0.896
RRM2	CHEK1	9606.ENSP00000353770	9606.ENSP00000388648	0	0	0	0	0.8	0.137	0	0.649	0.934
RRM2	MKI67	9606.ENSP00000353770	9606.ENSP00000357643	0	0	0	0	0.923	0	0	0.596	0.967
RRM2	NUSAP1	9606.ENSP00000353770	9606.ENSP00000453403	0	0	0	0	0.924	0	0	0.595	0.968
RRM2	TOP2A	9606.ENSP00000353770	9606.ENSP00000411532	0	0	0	0	0.935	0	0	0.671	0.978
RRP15	GLTSCR2	9606.ENSP00000355899	9606.ENSP00000246802	0	0	0	0	0.863	0	0	0.229	0.89
RRP15	NOLC1	9606.ENSP00000355899	9606.ENSP00000385410	0	0	0	0	0.791	0.126	0	0	0.809
RRP15	DNTTIP2	9606.ENSP00000355899	9606.ENSP00000411010	0	0	0	0	0.857	0	0	0	0.857
RRP15	GNL3	9606.ENSP00000355899	9606.ENSP00000395772	0	0	0	0	0.822	0	0	0.245	0.86
RRP15	NOP14	9606.ENSP00000355899	9606.ENSP00000405068	0	0	0	0	0.831	0	0	0.308	0.878
RRP15	FTSJ3	9606.ENSP00000355899	9606.ENSP00000396673	0	0	0	0	0.855	0	0.54	0.251	0.946
RYBP	YAF2	9606.ENSP00000419494	9606.ENSP00000328004	0	0	0	0.932	0	0.632	0.3	0.943	0.748
RYBP	BCOR	9606.ENSP00000419494	9606.ENSP00000367705	0	0	0	0	0	0.887	0	0.927	0.991
SAFB	ACIN1	9606.ENSP00000467423	9606.ENSP00000262710	0	0	0	0	0.287	0.414	0	0.372	0.715
SAFB	SUMO1	9606.ENSP00000467423	9606.ENSP00000376077	0	0	0	0	0.272	0.109	0.8	0.143	0.873
SART1	SNRPC	9606.ENSP00000310448	9606.ENSP00000244520	0	0	0	0	0.088	0.828	0	0.472	0.91
SART1	SRRM2	9606.ENSP00000310448	9606.ENSP00000301740	0	0	0	0	0.107	0.411	0.9	0.341	0.96
SDE2	CWC25	9606.ENSP00000272091	9606.ENSP00000478070	0	0	0	0	0.077	0.59	0	0.666	0.862
SDE2	SRRM2	9606.ENSP00000272091	9606.ENSP00000301740	0	0	0	0	0.045	0.868	0	0	0.868
SERBP1	RPLP2	9606.ENSP00000360034	9606.ENSP00000322419	0	0	0	0	0.201	0.955	0	0	0.962
SF1	SNRPC	9606.ENSP00000366604	9606.ENSP00000244520	0	0	0	0	0.303	0.16	0	0.774	0.856
SF1	SRSF2	9606.ENSP00000366604	9606.ENSP00000376276	0	0	0	0	0.475	0.105	0	0.506	0.747
SF1	SRSF5	9606.ENSP00000366604	9606.ENSP00000452123	0	0	0	0	0.316	0.423	0	0.46	0.768
SFSWAP	GTF2F1	9606.ENSP00000437738	9606.ENSP00000377969	0	0	0	0	0.057	0	0	0.736	0.74
SKA3	TPX2	9606.ENSP00000319417	9606.ENSP00000300403	0	0	0	0	0.832	0	0	0.18	0.857
SKA3	CDCA2	9606.ENSP00000319417	9606.ENSP00000328228	0	0	0	0	0.594	0	0	0.422	0.756
SKA3	CDCA3	9606.ENSP00000319417	9606.ENSP00000442068	0	0	0	0	0.745	0	0	0.113	0.764
SKA3	TOP2A	9606.ENSP00000319417	9606.ENSP00000411532	0	0	0	0	0.764	0	0	0.233	0.811
SLBP	NASP	9606.ENSP00000417686	9606.ENSP00000255120	0	0	0	0	0.924	0	0	0.828	0.986
SLBP	LIG1	9606.ENSP00000417686	9606.ENSP00000263274	0	0	0	0	0.828	0	0	0	0.828
SLBP	MCM2	9606.ENSP00000417686	9606.ENSP00000265056	0	0	0	0	0.863	0	0	0.347	0.907
SLBP	NUP35	9606.ENSP00000417686	9606.ENSP00000295119	0	0	0	0	0.233	0	0.9	0	0.92
SLBP	TPR	9606.ENSP00000417686	9606.ENSP00000356448	0	0	0	0	0.065	0	0.9	0.063	0.904
SLBP	YBX1	9606.ENSP00000417686	9606.ENSP00000361626	0	0	0	0	0.062	0	0.72	0.1	0.742
SMNDC1	SRSF9	9606.ENSP00000358616	9606.ENSP00000229390	0	0	0	0	0.07	0.698	0	0.204	0.757
SMNDC1	CFDP1	9606.ENSP00000358616	9606.ENSP00000283882	0	0	0	0	0.761	0	0	0	0.761
SNRPC	HNRNPD	9606.ENSP00000244520	9606.ENSP00000313199	0	0	0	0	0.108	0.696	0	0.175	0.757
SNRPC	SF1	9606.ENSP00000244520	9606.ENSP00000366604	0	0	0	0	0.303	0.16	0	0.774	0.856
SNRPC	SART1	9606.ENSP00000244520	9606.ENSP00000310448	0	0	0	0	0.088	0.828	0	0.472	0.91
SNRPC	SRSF2	9606.ENSP00000244520	9606.ENSP00000376276	0	0	0	0	0.342	0	0.9	0.345	0.953
SOX6	BCL11A	9606.ENSP00000379644	9606.ENSP00000338774	0	0	0	0	0.066	0.101	0	0.917	0.925
SP3	SUMO1	9606.ENSP00000310301	9606.ENSP00000376077	0	0	0	0	0.133	0.296	0.8	0.223	0.892
SPEN	KMT2D	9606.ENSP00000364912	9606.ENSP00000301067	0	0	0	0	0.654	0.166	0	0.395	0.81
SRRM1	SRSF9	9606.ENSP00000326261	9606.ENSP00000229390	0	0	0	0	0.083	0.767	0.6	0.551	0.956
SRRM1	ACIN1	9606.ENSP00000326261	9606.ENSP00000262710	0	0	0	0	0.318	0.39	0	0.447	0.75
SRRM1	CASC3	9606.ENSP00000326261	9606.ENSP00000264645	0	0	0	0	0.064	0	0.6	0.531	0.809
SRRM1	SRRM2	9606.ENSP00000326261	9606.ENSP00000301740	0	0	0	0	0.267	0.936	0.8	0.924	0.999
SRRM1	SRSF5	9606.ENSP00000326261	9606.ENSP00000452123	0	0	0	0	0.149	0.438	0.6	0.664	0.927
SRRM1	SRSF2	9606.ENSP00000326261	9606.ENSP00000376276	0	0	0	0	0.383	0.794	0.6	0.628	0.978
SRRM2	PPIG	9606.ENSP00000301740	9606.ENSP00000260970	0	0	0	0	0.126	0.826	0	0.099	0.851
SRRM2	ACIN1	9606.ENSP00000301740	9606.ENSP00000262710	0	0	0	0	0.775	0.681	0	0.432	0.955
SRRM2	CASC3	9606.ENSP00000301740	9606.ENSP00000264645	0	0	0	0	0.065	0.8	0	0.367	0.871
SRRM2	SDE2	9606.ENSP00000301740	9606.ENSP00000272091	0	0	0	0	0.045	0.868	0	0	0.868
SRRM2	KMT2D	9606.ENSP00000301740	9606.ENSP00000301067	0	0	0	0	0.836	0	0	0.061	0.839
SRRM2	SRSF5	9606.ENSP00000301740	9606.ENSP00000452123	0	0	0	0	0.132	0.56	0	0.607	0.836
SRRM2	ZC3H18	9606.ENSP00000301740	9606.ENSP00000416951	0	0	0	0	0.118	0.823	0	0	0.837
SRRM2	SART1	9606.ENSP00000301740	9606.ENSP00000310448	0	0	0	0	0.107	0.411	0.9	0.341	0.96
SRRM2	CWC25	9606.ENSP00000301740	9606.ENSP00000478070	0	0	0	0	0.084	0.868	0	0.734	0.965
SRRM2	SRRM1	9606.ENSP00000301740	9606.ENSP00000326261	0	0	0	0	0.267	0.936	0.8	0.924	0.999
SRRT	PHAX	9606.ENSP00000480421	9606.ENSP00000297540	0	0	0	0	0.132	0	0.8	0.977	0.995
SRRT	C17orf85	9606.ENSP00000480421	9606.ENSP00000373657	0	0	0	0	0.142	0.477	0	0.727	0.867
SRRT	ZC3H18	9606.ENSP00000480421	9606.ENSP00000416951	0	0	0	0	0.194	0.678	0	0.336	0.812
SRSF2	SRSF9	9606.ENSP00000376276	9606.ENSP00000229390	0	0	0	0	0.272	0.884	0.8	0.789	0.996
SRSF2	SNRPC	9606.ENSP00000376276	9606.ENSP00000244520	0	0	0	0	0.342	0	0.9	0.345	0.953
SRSF2	THOC2	9606.ENSP00000376276	9606.ENSP00000245838	0	0	0	0	0.099	0	0.6	0.292	0.722
SRSF2	CASC3	9606.ENSP00000376276	9606.ENSP00000264645	0	0	0	0	0.063	0	0.6	0.329	0.726
SRSF2	SRRM1	9606.ENSP00000376276	9606.ENSP00000326261	0	0	0	0	0.383	0.794	0.6	0.628	0.978
SRSF2	FIP1L1	9606.ENSP00000376276	9606.ENSP00000336752	0	0	0	0	0.092	0	0.6	0.273	0.713
SRSF2	DDX21	9606.ENSP00000376276	9606.ENSP00000346120	0	0	0	0	0.312	0	0	0.609	0.719
SRSF2	YBX1	9606.ENSP00000376276	9606.ENSP00000361626	0	0	0	0	0.108	0	0.8	0.358	0.875
SRSF2	SF1	9606.ENSP00000376276	9606.ENSP00000366604	0	0	0	0	0.475	0.105	0	0.506	0.747
SRSF2	ZC3H11A	9606.ENSP00000376276	9606.ENSP00000438527	0	0	0	0	0.153	0	0.6	0.201	0.705
SRSF2	GTF2F1	9606.ENSP00000376276	9606.ENSP00000377969	0	0	0	0	0.304	0	0.6	0.082	0.722
SRSF2	SRSF5	9606.ENSP00000376276	9606.ENSP00000452123	0	0	0	0.754	0.289	0.255	0.8	0.884	0.909
SRSF5	SRSF9	9606.ENSP00000452123	9606.ENSP00000229390	0	0	0	0.816	0.09	0.078	0.8	0.827	0.845
SRSF5	THOC2	9606.ENSP00000452123	9606.ENSP00000245838	0	0	0	0	0.094	0.103	0.6	0.249	0.723
SRSF5	SRRM2	9606.ENSP00000452123	9606.ENSP00000301740	0	0	0	0	0.132	0.56	0	0.607	0.836
SRSF5	SRRM1	9606.ENSP00000452123	9606.ENSP00000326261	0	0	0	0	0.149	0.438	0.6	0.664	0.927
SRSF5	FIP1L1	9606.ENSP00000452123	9606.ENSP00000336752	0	0	0	0	0.096	0.338	0.6	0.152	0.769
SRSF5	SF1	9606.ENSP00000452123	9606.ENSP00000366604	0	0	0	0	0.316	0.423	0	0.46	0.768
SRSF5	SRSF2	9606.ENSP00000452123	9606.ENSP00000376276	0	0	0	0.754	0.289	0.255	0.8	0.884	0.909
SRSF9	THOC2	9606.ENSP00000229390	9606.ENSP00000245838	0	0	0	0	0.165	0.063	0.6	0.172	0.706
SRSF9	SMNDC1	9606.ENSP00000229390	9606.ENSP00000358616	0	0	0	0	0.07	0.698	0	0.204	0.757
SRSF9	YBX1	9606.ENSP00000229390	9606.ENSP00000361626	0.051	0	0	0	0.102	0.473	0	0.555	0.774
SRSF9	FIP1L1	9606.ENSP00000229390	9606.ENSP00000336752	0	0	0	0	0.145	0.338	0.6	0.135	0.777
SRSF9	SRSF5	9606.ENSP00000229390	9606.ENSP00000452123	0	0	0	0.816	0.09	0.078	0.8	0.827	0.845
SRSF9	CASC3	9606.ENSP00000229390	9606.ENSP00000264645	0	0	0	0	0.056	0.7	0.6	0.368	0.918
SRSF9	SRRM1	9606.ENSP00000229390	9606.ENSP00000326261	0	0	0	0	0.083	0.767	0.6	0.551	0.956
SRSF9	SRSF2	9606.ENSP00000229390	9606.ENSP00000376276	0	0	0	0	0.272	0.884	0.8	0.789	0.996
SUMO1	SP3	9606.ENSP00000376077	9606.ENSP00000310301	0	0	0	0	0.133	0.296	0.8	0.223	0.892
SUMO1	RNF168	9606.ENSP00000376077	9606.ENSP00000320898	0	0	0	0	0	0.27	0.8	0.416	0.907
SUMO1	ZEB1	9606.ENSP00000376077	9606.ENSP00000354487	0	0	0	0	0	0.105	0.9	0.119	0.914
SUMO1	TPR	9606.ENSP00000376077	9606.ENSP00000356448	0	0	0	0	0.183	0.077	0.6	0.264	0.748
SUMO1	MDC1	9606.ENSP00000376077	9606.ENSP00000365588	0	0	0	0	0.065	0.222	0.8	0.407	0.902
SUMO1	RAD23A	9606.ENSP00000376077	9606.ENSP00000467024	0	0	0	0	0.097	0.076	0.6	0.346	0.752
SUMO1	SAFB	9606.ENSP00000376077	9606.ENSP00000467423	0	0	0	0	0.272	0.109	0.8	0.143	0.873
SUMO1	MBD1	9606.ENSP00000376077	9606.ENSP00000468785	0	0	0	0	0	0.27	0.8	0.396	0.904
SUMO1	TOP2B	9606.ENSP00000376077	9606.ENSP00000396704	0	0	0	0	0.068	0.366	0.8	0.346	0.912
SUMO1	INCENP	9606.ENSP00000376077	9606.ENSP00000378295	0	0	0	0	0.067	0	0.9	0.162	0.915
SUMO1	TOP2A	9606.ENSP00000376077	9606.ENSP00000411532	0	0	0	0	0.064	0.382	0.8	0.416	0.923
SUMO1	BRCA1	9606.ENSP00000376077	9606.ENSP00000418960	0	0	0	0	0.062	0.661	0.8	0.547	0.967
SUMO1	RNF4	9606.ENSP00000376077	9606.ENSP00000426503	0	0	0	0	0	0.9	0.9	0.824	0.998
SYNJ1	BIN2	9606.ENSP00000409667	9606.ENSP00000267012	0	0	0	0	0.053	0.104	0.9	0.146	0.917
SYNJ1	BIN1	9606.ENSP00000409667	9606.ENSP00000316779	0	0	0	0	0.053	0.325	0.9	0.548	0.967
SYNJ1	EPS15	9606.ENSP00000409667	9606.ENSP00000360798	0	0	0	0	0.065	0.378	0.9	0.755	0.983
TAF7	MED26	9606.ENSP00000312709	9606.ENSP00000263390	0	0	0	0	0.065	0.27	0	0.7	0.777
TAF7	C17orf49	9606.ENSP00000312709	9606.ENSP00000448598	0	0	0	0	0	0	0.9	0	0.9
TAF7	TCEA1	9606.ENSP00000312709	9606.ENSP00000428426	0	0	0	0	0.11	0	0.9	0.125	0.915
TAF7	GTF2F1	9606.ENSP00000312709	9606.ENSP00000377969	0	0	0	0	0.156	0	0.9	0.712	0.973
TAL1	TCF3	9606.ENSP00000294339	9606.ENSP00000262965	0	0	0	0	0.062	0.897	0.6	0.988	0.999
TAL1	MYB	9606.ENSP00000294339	9606.ENSP00000339992	0	0	0	0	0.062	0.27	0.8	0.75	0.961
TAL1	TCF12	9606.ENSP00000294339	9606.ENSP00000388940	0	0	0	0	0.062	0.883	0.6	0.791	0.989
TCEA1	TAF7	9606.ENSP00000428426	9606.ENSP00000312709	0	0	0	0	0.11	0	0.9	0.125	0.915
TCEA1	GTF2F1	9606.ENSP00000428426	9606.ENSP00000377969	0	0	0	0	0.062	0.925	0.9	0.51	0.996
TCEA1	EAF1	9606.ENSP00000428426	9606.ENSP00000380054	0	0	0	0	0.062	0.113	0.8	0.226	0.854
TCF12	TAL1	9606.ENSP00000388940	9606.ENSP00000294339	0	0	0	0	0.062	0.883	0.6	0.791	0.989
TCF12	MYB	9606.ENSP00000388940	9606.ENSP00000339992	0	0	0	0	0.064	0	0.6	0.31	0.719
TCF20	RAI1	9606.ENSP00000352463	9606.ENSP00000323074	0	0	0	0.576	0.087	0.647	0	0.598	0.746
TCF20	MDC1	9606.ENSP00000352463	9606.ENSP00000365588	0	0	0	0	0.085	0.468	0	0.44	0.704
TCF20	RNF4	9606.ENSP00000352463	9606.ENSP00000426503	0	0	0	0	0.062	0.486	0	0.716	0.851
TCF3	MYB	9606.ENSP00000262965	9606.ENSP00000339992	0	0	0	0	0.085	0	0.6	0.422	0.77
TCF3	TAL1	9606.ENSP00000262965	9606.ENSP00000294339	0	0	0	0	0.062	0.897	0.6	0.988	0.999
TCOF1	NOLC1	9606.ENSP00000367028	9606.ENSP00000385410	0	0	0	0.552	0.126	0.633	0	0.905	0.8
THOC2	SRSF9	9606.ENSP00000245838	9606.ENSP00000229390	0	0	0	0	0.165	0.063	0.6	0.172	0.706
THOC2	SRSF2	9606.ENSP00000245838	9606.ENSP00000376276	0	0	0	0	0.099	0	0.6	0.292	0.722
THOC2	SRSF5	9606.ENSP00000245838	9606.ENSP00000452123	0	0	0	0	0.094	0.103	0.6	0.249	0.723
THOC2	FIP1L1	9606.ENSP00000245838	9606.ENSP00000336752	0	0	0	0	0.201	0.115	0.6	0.153	0.728
THOC2	ATRX	9606.ENSP00000245838	9606.ENSP00000362441	0	0	0	0	0.683	0.077	0	0.186	0.741
THOC2	TPR	9606.ENSP00000245838	9606.ENSP00000356448	0	0	0	0	0.546	0	0	0.486	0.756
THOC2	ZC3H11A	9606.ENSP00000245838	9606.ENSP00000438527	0	0	0	0	0.187	0.387	0.6	0.293	0.84
THOC2	C17orf85	9606.ENSP00000245838	9606.ENSP00000373657	0	0	0	0	0.145	0.673	0	0.54	0.86
THRAP3	MED26	9606.ENSP00000346634	9606.ENSP00000263390	0	0	0	0	0	0	0.9	0.066	0.902
THRAP3	BCLAF1	9606.ENSP00000346634	9606.ENSP00000435210	0	0	0	0.806	0.228	0.843	0.54	0.959	0.95
TICRR	MCM2	9606.ENSP00000268138	9606.ENSP00000265056	0	0	0	0	0.342	0	0	0.937	0.958
TICRR	MKI67	9606.ENSP00000268138	9606.ENSP00000357643	0	0	0	0	0.734	0.27	0	0.089	0.808
TICRR	CHEK1	9606.ENSP00000268138	9606.ENSP00000388648	0	0	0	0	0.394	0	0	0.847	0.903
TICRR	MCM10	9606.ENSP00000268138	9606.ENSP00000418268	0	0	0	0	0.565	0	0	0.853	0.933
TMPO	NUSAP1	9606.ENSP00000266732	9606.ENSP00000453403	0	0	0	0	0.56	0.198	0	0.326	0.741
TNKS1BP1	EIF4B	9606.ENSP00000437271	9606.ENSP00000388806	0	0	0	0	0	0	0.9	0	0.9
TNRC6B	KMT2D	9606.ENSP00000401946	9606.ENSP00000301067	0	0	0	0	0.098	0	0.9	0	0.905
TNRC6B	FOXO3	9606.ENSP00000401946	9606.ENSP00000385824	0	0	0	0	0	0	0.9	0	0.9
TOP2A	RAD51AP1	9606.ENSP00000411532	9606.ENSP00000228843	0	0	0	0	0.824	0	0	0.525	0.913
TOP2A	GPBP1	9606.ENSP00000411532	9606.ENSP00000264779	0	0	0	0	0.063	0	0	0.731	0.737
TOP2A	MCM2	9606.ENSP00000411532	9606.ENSP00000265056	0	0	0	0	0.811	0.066	0	0.655	0.934
TOP2A	ANLN	9606.ENSP00000411532	9606.ENSP00000265748	0	0	0	0	0.834	0.27	0	0.469	0.93
TOP2A	NUP35	9606.ENSP00000411532	9606.ENSP00000295119	0	0	0	0	0.066	0	0.9	0.073	0.905
TOP2A	TPX2	9606.ENSP00000411532	9606.ENSP00000300403	0	0	0	0	0.993	0	0	0.604	0.997
TOP2A	CLSPN	9606.ENSP00000411532	9606.ENSP00000312995	0	0	0	0	0.759	0	0	0.449	0.862
TOP2A	SKA3	9606.ENSP00000411532	9606.ENSP00000319417	0	0	0	0	0.764	0	0	0.233	0.811
TOP2A	CDCA2	9606.ENSP00000411532	9606.ENSP00000328228	0	0	0	0	0.652	0	0	0.266	0.734
TOP2A	ERCC6L	9606.ENSP00000411532	9606.ENSP00000334675	0	0	0	0	0.583	0.166	0	0.543	0.827
TOP2A	RRM2	9606.ENSP00000411532	9606.ENSP00000353770	0	0	0	0	0.935	0	0	0.671	0.978
TOP2A	TPR	9606.ENSP00000411532	9606.ENSP00000356448	0	0	0	0	0.221	0.146	0.9	0.045	0.928
TOP2A	MKI67	9606.ENSP00000411532	9606.ENSP00000357643	0	0	0	0	0.966	0	0	0.66	0.988
TOP2A	MDC1	9606.ENSP00000411532	9606.ENSP00000365588	0	0	0	0	0.11	0.107	0	0.9	0.915
TOP2A	SUMO1	9606.ENSP00000411532	9606.ENSP00000376077	0	0	0	0	0.064	0.382	0.8	0.416	0.923
TOP2A	INCENP	9606.ENSP00000411532	9606.ENSP00000378295	0	0	0	0	0.699	0	0	0.264	0.769
TOP2A	CHEK1	9606.ENSP00000411532	9606.ENSP00000388648	0	0	0	0	0.803	0.205	0	0.678	0.945
TOP2A	TOP2B	9606.ENSP00000411532	9606.ENSP00000396704	0	0	0	0.972	0.062	0.489	0.8	0.805	0.898
TOP2A	MCM10	9606.ENSP00000411532	9606.ENSP00000418268	0	0	0	0	0.785	0	0	0.38	0.861
TOP2A	LIN52	9606.ENSP00000411532	9606.ENSP00000451812	0	0	0	0	0	0	0.9	0.064	0.902
TOP2A	BRCA1	9606.ENSP00000411532	9606.ENSP00000418960	0	0	0	0	0.676	0.383	0	0.567	0.906
TOP2A	CDCA3	9606.ENSP00000411532	9606.ENSP00000442068	0	0	0	0	0.943	0	0	0.464	0.968
TOP2A	NUSAP1	9606.ENSP00000411532	9606.ENSP00000453403	0	0	0	0	0.966	0	0	0.649	0.987
TOP2B	SUMO1	9606.ENSP00000396704	9606.ENSP00000376077	0	0	0	0	0.068	0.366	0.8	0.346	0.912
TOP2B	TOP2A	9606.ENSP00000396704	9606.ENSP00000411532	0	0	0	0.972	0.062	0.489	0.8	0.805	0.898
TPR	THOC2	9606.ENSP00000356448	9606.ENSP00000245838	0	0	0	0	0.546	0	0	0.486	0.756
TPR	NUP35	9606.ENSP00000356448	9606.ENSP00000295119	0	0	0	0	0.127	0	0.8	0.505	0.906
TPR	PHAX	9606.ENSP00000356448	9606.ENSP00000297540	0	0	0	0	0.086	0	0.9	0	0.904
TPR	FIP1L1	9606.ENSP00000356448	9606.ENSP00000336752	0	0	0	0	0.219	0.152	0.9	0	0.927
TPR	AHCTF1	9606.ENSP00000356448	9606.ENSP00000355465	0	0	0	0	0.586	0	0	0.719	0.879
TPR	SUMO1	9606.ENSP00000356448	9606.ENSP00000376077	0	0	0	0	0.183	0.077	0.6	0.264	0.748
TPR	ATRX	9606.ENSP00000356448	9606.ENSP00000362441	0	0	0	0	0.819	0.057	0	0	0.822
TPR	SLBP	9606.ENSP00000356448	9606.ENSP00000417686	0	0	0	0	0.065	0	0.9	0.063	0.904
TPR	INCENP	9606.ENSP00000356448	9606.ENSP00000378295	0	0	0	0	0.082	0	0.9	0.123	0.912
TPR	TOP2A	9606.ENSP00000356448	9606.ENSP00000411532	0	0	0	0	0.221	0.146	0.9	0.045	0.928
TPX2	RAD51AP1	9606.ENSP00000300403	9606.ENSP00000228843	0	0	0	0	0.802	0	0	0.218	0.838
TPX2	MCM2	9606.ENSP00000300403	9606.ENSP00000265056	0	0	0	0	0.791	0	0	0.325	0.853
TPX2	ANLN	9606.ENSP00000300403	9606.ENSP00000265748	0	0	0	0	0.839	0	0	0.482	0.913
TPX2	CHEK1	9606.ENSP00000300403	9606.ENSP00000388648	0	0	0	0	0.787	0	0	0.194	0.821
TPX2	MCM10	9606.ENSP00000300403	9606.ENSP00000418268	0	0	0	0	0.785	0	0	0.218	0.825
TPX2	SKA3	9606.ENSP00000300403	9606.ENSP00000319417	0	0	0	0	0.832	0	0	0.18	0.857
TPX2	BRCA1	9606.ENSP00000300403	9606.ENSP00000418960	0	0	0	0	0.411	0.682	0	0.514	0.901
TPX2	INCENP	9606.ENSP00000300403	9606.ENSP00000378295	0	0	0	0	0.689	0	0	0.699	0.902
TPX2	CDCA3	9606.ENSP00000300403	9606.ENSP00000442068	0	0	0	0	0.871	0	0	0.345	0.912
TPX2	MKI67	9606.ENSP00000300403	9606.ENSP00000357643	0	0	0	0	0.847	0.27	0	0.4	0.927
TPX2	RRM2	9606.ENSP00000300403	9606.ENSP00000353770	0	0	0	0	0.923	0	0	0.414	0.953
TPX2	NUSAP1	9606.ENSP00000300403	9606.ENSP00000453403	0	0	0	0	0.913	0	0	0.661	0.969
TPX2	TOP2A	9606.ENSP00000300403	9606.ENSP00000411532	0	0	0	0	0.993	0	0	0.604	0.997
YAF2	RYBP	9606.ENSP00000328004	9606.ENSP00000419494	0	0	0	0.932	0	0.632	0.3	0.943	0.748
YAF2	BCOR	9606.ENSP00000328004	9606.ENSP00000367705	0	0	0	0	0	0.898	0	0.682	0.966
YBX1	SRSF9	9606.ENSP00000361626	9606.ENSP00000229390	0.051	0	0	0	0.102	0.473	0	0.555	0.774
YBX1	HNRNPD	9606.ENSP00000361626	9606.ENSP00000313199	0	0	0	0	0.104	0.538	0	0.806	0.913
YBX1	LARP1	9606.ENSP00000361626	9606.ENSP00000336721	0	0	0	0	0.163	0.504	0	0.49	0.77
YBX1	SLBP	9606.ENSP00000361626	9606.ENSP00000417686	0	0	0	0	0.062	0	0.72	0.1	0.742
YBX1	NACA	9606.ENSP00000361626	9606.ENSP00000448035	0	0	0	0	0.349	0.79	0	0.052	0.859
YBX1	SRSF2	9606.ENSP00000361626	9606.ENSP00000376276	0	0	0	0	0.108	0	0.8	0.358	0.875
ZC3H11A	THOC2	9606.ENSP00000438527	9606.ENSP00000245838	0	0	0	0	0.187	0.387	0.6	0.293	0.84
ZC3H11A	CASC3	9606.ENSP00000438527	9606.ENSP00000264645	0	0	0	0	0	0	0.6	0.452	0.771
ZC3H11A	C17orf85	9606.ENSP00000438527	9606.ENSP00000373657	0	0	0	0	0.109	0.679	0	0	0.701
ZC3H11A	SRSF2	9606.ENSP00000438527	9606.ENSP00000376276	0	0	0	0	0.153	0	0.6	0.201	0.705
ZC3H18	ACIN1	9606.ENSP00000416951	9606.ENSP00000262710	0	0	0	0	0.129	0.735	0	0	0.759
ZC3H18	SRRM2	9606.ENSP00000416951	9606.ENSP00000301740	0	0	0	0	0.118	0.823	0	0	0.837
ZC3H18	SRRT	9606.ENSP00000416951	9606.ENSP00000480421	0	0	0	0	0.194	0.678	0	0.336	0.812
ZC3H4	FIP1L1	9606.ENSP00000253048	9606.ENSP00000336752	0	0	0	0	0.075	0.608	0	0.377	0.754
ZEB1	ZEB2	9606.ENSP00000354487	9606.ENSP00000454157	0	0	0	0.904	0.084	0	0.8	0.914	0.825
ZEB1	SUMO1	9606.ENSP00000354487	9606.ENSP00000376077	0	0	0	0	0	0.105	0.9	0.119	0.914
ZEB1	FOXO3	9606.ENSP00000354487	9606.ENSP00000385824	0	0	0	0	0	0	0.9	0.342	0.931
ZEB2	ZEB1	9606.ENSP00000454157	9606.ENSP00000354487	0	0	0	0.904	0.084	0	0.8	0.914	0.825

## Sheet: DOWN in REL_No CHK1_High
#node1	node2	node1_string_id	node2_string_id	neighborhood_on_chromosome	gene_fusion	phylogenetic_cooccurrence	homology	coexpression	experimentally_determined_interaction	database_annotated	automated_textmining	combined_score
ABCF1	NUFIP2	9606.ENSP00000313603	9606.ENSP00000225388	0	0	0	0	0.079	0	0.72	0.136	0.757
ABCF1	LARP4B	9606.ENSP00000313603	9606.ENSP00000482767	0	0	0	0	0.1	0	0.9	0	0.906
ACIN1	SAFB	9606.ENSP00000262710	9606.ENSP00000467423	0	0	0	0	0.287	0.414	0	0.372	0.715
ACIN1	SRRM1	9606.ENSP00000262710	9606.ENSP00000326261	0	0	0	0	0.318	0.39	0	0.447	0.75
ACIN1	ZC3H18	9606.ENSP00000262710	9606.ENSP00000416951	0	0	0	0	0.129	0.735	0	0	0.759
ACIN1	SRRM2	9606.ENSP00000262710	9606.ENSP00000301740	0	0	0	0	0.775	0.681	0	0.432	0.955
ADD1	ADD2	9606.ENSP00000264758	9606.ENSP00000264436	0	0	0.414	0.922	0.062	0.717	0.8	0.972	0.948
ADD1	DMTN	9606.ENSP00000264758	9606.ENSP00000427866	0	0	0	0	0.083	0.246	0.6	0.607	0.876
ADD2	ADD1	9606.ENSP00000264436	9606.ENSP00000264758	0	0	0.414	0.922	0.062	0.717	0.8	0.972	0.948
ADD2	DMTN	9606.ENSP00000264436	9606.ENSP00000427866	0	0	0	0	0.065	0.394	0.6	0.817	0.952
AHCTF1	MCM2	9606.ENSP00000355465	9606.ENSP00000265056	0	0	0	0	0.072	0	0	0.786	0.793
AHCTF1	NUP35	9606.ENSP00000355465	9606.ENSP00000295119	0	0	0	0	0.081	0.39	0.6	0.826	0.955
AHCTF1	TPR	9606.ENSP00000355465	9606.ENSP00000356448	0	0	0	0	0.586	0	0	0.719	0.879
AKAP12	AKAP13	9606.ENSP00000384537	9606.ENSP00000354718	0	0	0	0	0	0	0	0.758	0.759
AKAP13	AKAP12	9606.ENSP00000354718	9606.ENSP00000384537	0	0	0	0	0	0	0	0.758	0.759
ANLN	RAD51AP1	9606.ENSP00000265748	9606.ENSP00000228843	0	0	0	0	0.778	0	0	0.134	0.799
ANLN	CDCA2	9606.ENSP00000265748	9606.ENSP00000328228	0	0	0	0	0.568	0	0	0.345	0.705
ANLN	MKI67	9606.ENSP00000265748	9606.ENSP00000357643	0	0	0	0	0.59	0.27	0	0.287	0.768
ANLN	INCENP	9606.ENSP00000265748	9606.ENSP00000378295	0	0	0	0	0.589	0.27	0	0.566	0.858
ANLN	RRM2	9606.ENSP00000265748	9606.ENSP00000353770	0	0	0	0	0.794	0	0	0.369	0.865
ANLN	NUSAP1	9606.ENSP00000265748	9606.ENSP00000453403	0	0	0	0	0.811	0	0	0.363	0.874
ANLN	TPX2	9606.ENSP00000265748	9606.ENSP00000300403	0	0	0	0	0.839	0	0	0.482	0.913
ANLN	TOP2A	9606.ENSP00000265748	9606.ENSP00000411532	0	0	0	0	0.834	0.27	0	0.469	0.93
ATF7IP	MBD1	9606.ENSP00000440440	9606.ENSP00000468785	0	0	0	0	0	0.675	0	0.798	0.931
ATRX	THOC2	9606.ENSP00000362441	9606.ENSP00000245838	0	0	0	0	0.683	0.077	0	0.186	0.741
ATRX	PPIG	9606.ENSP00000362441	9606.ENSP00000260970	0	0	0	0	0.254	0.077	0	0.697	0.773
ATRX	BDP1	9606.ENSP00000362441	9606.ENSP00000351575	0	0	0	0	0.826	0.058	0	0.048	0.831
ATRX	TPR	9606.ENSP00000362441	9606.ENSP00000356448	0	0	0	0	0.819	0.057	0	0	0.822
ATRX	BRCA1	9606.ENSP00000362441	9606.ENSP00000418960	0	0	0	0	0.062	0.056	0	0.771	0.78
BCL11A	SOX6	9606.ENSP00000338774	9606.ENSP00000379644	0	0	0	0	0.066	0.101	0	0.917	0.925
BCLAF1	PSME3	9606.ENSP00000435210	9606.ENSP00000293362	0	0	0	0	0.273	0.27	0	0.562	0.747
BCLAF1	THRAP3	9606.ENSP00000435210	9606.ENSP00000346634	0	0	0	0.806	0.228	0.843	0.54	0.959	0.95
BCLAF1	BRCA1	9606.ENSP00000435210	9606.ENSP00000418960	0	0	0	0	0.062	0	0	0.973	0.973
BCOR	YAF2	9606.ENSP00000367705	9606.ENSP00000328004	0	0	0	0	0	0.898	0	0.682	0.966
BCOR	RYBP	9606.ENSP00000367705	9606.ENSP00000419494	0	0	0	0	0	0.887	0	0.927	0.991
BDP1	RIF1	9606.ENSP00000351575	9606.ENSP00000243326	0	0	0	0	0.831	0	0	0	0.831
BDP1	POLR3G	9606.ENSP00000351575	9606.ENSP00000382058	0	0	0	0	0	0	0.6	0.529	0.803
BDP1	ATRX	9606.ENSP00000351575	9606.ENSP00000362441	0	0	0	0	0.826	0.058	0	0.048	0.831
BIN1	BIN2	9606.ENSP00000316779	9606.ENSP00000267012	0	0	0	0.831	0	0.74	0.9	0.878	0.976
BIN1	EPS15	9606.ENSP00000316779	9606.ENSP00000360798	0	0	0	0	0.064	0.246	0.9	0.584	0.966
BIN1	SYNJ1	9606.ENSP00000316779	9606.ENSP00000409667	0	0	0	0	0.053	0.325	0.9	0.548	0.967
BIN2	SYNJ1	9606.ENSP00000267012	9606.ENSP00000409667	0	0	0	0	0.053	0.104	0.9	0.146	0.917
BIN2	EPS15	9606.ENSP00000267012	9606.ENSP00000360798	0	0	0	0	0.064	0.246	0.9	0.251	0.94
BIN2	BIN1	9606.ENSP00000267012	9606.ENSP00000316779	0	0	0	0.831	0	0.74	0.9	0.878	0.976
BRCA1	RAD51AP1	9606.ENSP00000418960	9606.ENSP00000228843	0	0	0	0	0.368	0	0.6	0.459	0.851
BRCA1	RIF1	9606.ENSP00000418960	9606.ENSP00000243326	0	0	0	0	0.092	0.405	0.65	0.298	0.849
BRCA1	TPX2	9606.ENSP00000418960	9606.ENSP00000300403	0	0	0	0	0.411	0.682	0	0.514	0.901
BRCA1	CLSPN	9606.ENSP00000418960	9606.ENSP00000312995	0	0	0	0	0.341	0.487	0.6	0.683	0.951
BRCA1	RNF168	9606.ENSP00000418960	9606.ENSP00000320898	0	0	0	0	0.082	0.647	0.6	0.837	0.976
BRCA1	RRM2	9606.ENSP00000418960	9606.ENSP00000353770	0	0	0	0	0.409	0	0	0.525	0.708
BRCA1	ATRX	9606.ENSP00000418960	9606.ENSP00000362441	0	0	0	0	0.062	0.056	0	0.771	0.78
BRCA1	MDC1	9606.ENSP00000418960	9606.ENSP00000365588	0	0	0	0	0.062	0.873	0.9	0.935	0.999
BRCA1	SUMO1	9606.ENSP00000418960	9606.ENSP00000376077	0	0	0	0	0.062	0.661	0.8	0.547	0.967
BRCA1	TOP2A	9606.ENSP00000418960	9606.ENSP00000411532	0	0	0	0	0.676	0.383	0	0.567	0.906
BRCA1	MCM10	9606.ENSP00000418960	9606.ENSP00000418268	0	0	0	0	0.567	0.459	0	0.324	0.827
BRCA1	RNF4	9606.ENSP00000418960	9606.ENSP00000426503	0	0	0	0	0	0	0.9	0.469	0.944
BRCA1	BCLAF1	9606.ENSP00000418960	9606.ENSP00000435210	0	0	0	0	0.062	0	0	0.973	0.973
BTF3	RPLP2	9606.ENSP00000369965	9606.ENSP00000322419	0	0	0	0	0.595	0.567	0	0.101	0.828
BTF3	EEF1B2	9606.ENSP00000369965	9606.ENSP00000376056	0	0	0	0	0.62	0.247	0	0.184	0.746
BTF3	NACA	9606.ENSP00000369965	9606.ENSP00000448035	0	0	0	0	0.737	0.987	0.54	0.466	0.999
C17orf49	TAF7	9606.ENSP00000448598	9606.ENSP00000312709	0	0	0	0	0	0	0.9	0	0.9
C17orf85	THOC2	9606.ENSP00000373657	9606.ENSP00000245838	0	0	0	0	0.145	0.673	0	0.54	0.86
C17orf85	ZC3H11A	9606.ENSP00000373657	9606.ENSP00000438527	0	0	0	0	0.109	0.679	0	0	0.701
C17orf85	SRRT	9606.ENSP00000373657	9606.ENSP00000480421	0	0	0	0	0.142	0.477	0	0.727	0.867
CASC3	SRSF9	9606.ENSP00000264645	9606.ENSP00000229390	0	0	0	0	0.056	0.7	0.6	0.368	0.918
CASC3	PPIG	9606.ENSP00000264645	9606.ENSP00000260970	0	0	0	0	0	0.8	0	0.043	0.8
CASC3	SRSF2	9606.ENSP00000264645	9606.ENSP00000376276	0	0	0	0	0.063	0	0.6	0.329	0.726
CASC3	ZC3H11A	9606.ENSP00000264645	9606.ENSP00000438527	0	0	0	0	0	0	0.6	0.452	0.771
CASC3	SRRM1	9606.ENSP00000264645	9606.ENSP00000326261	0	0	0	0	0.064	0	0.6	0.531	0.809
CASC3	SRRM2	9606.ENSP00000264645	9606.ENSP00000301740	0	0	0	0	0.065	0.8	0	0.367	0.871
CASC3	CWC25	9606.ENSP00000264645	9606.ENSP00000478070	0	0	0	0	0	0.8	0.9	0.055	0.979
CDCA2	ANLN	9606.ENSP00000328228	9606.ENSP00000265748	0	0	0	0	0.568	0	0	0.345	0.705
CDCA2	SKA3	9606.ENSP00000328228	9606.ENSP00000319417	0	0	0	0	0.594	0	0	0.422	0.756
CDCA2	MCM10	9606.ENSP00000328228	9606.ENSP00000418268	0	0	0	0	0.55	0	0	0.39	0.714
CDCA2	TOP2A	9606.ENSP00000328228	9606.ENSP00000411532	0	0	0	0	0.652	0	0	0.266	0.734
CDCA2	NUSAP1	9606.ENSP00000328228	9606.ENSP00000453403	0	0	0	0	0.702	0	0	0.403	0.814
CDCA2	CDCA3	9606.ENSP00000328228	9606.ENSP00000442068	0	0	0	0	0.557	0	0	0.609	0.819
CDCA3	TPX2	9606.ENSP00000442068	9606.ENSP00000300403	0	0	0	0	0.871	0	0	0.345	0.912
CDCA3	SKA3	9606.ENSP00000442068	9606.ENSP00000319417	0	0	0	0	0.745	0	0	0.113	0.764
CDCA3	CDCA2	9606.ENSP00000442068	9606.ENSP00000328228	0	0	0	0	0.557	0	0	0.609	0.819
CDCA3	RRM2	9606.ENSP00000442068	9606.ENSP00000353770	0	0	0	0	0.861	0	0	0.282	0.896
CDCA3	MKI67	9606.ENSP00000442068	9606.ENSP00000357643	0	0	0	0	0.728	0	0	0.364	0.82
CDCA3	TOP2A	9606.ENSP00000442068	9606.ENSP00000411532	0	0	0	0	0.943	0	0	0.464	0.968
CDCA3	NUSAP1	9606.ENSP00000442068	9606.ENSP00000453403	0	0	0	0	0.883	0	0	0.511	0.94
CENPC	INCENP	9606.ENSP00000273853	9606.ENSP00000378295	0	0	0	0	0.065	0.161	0	0.717	0.758
CFDP1	SMNDC1	9606.ENSP00000283882	9606.ENSP00000358616	0	0	0	0	0.761	0	0	0	0.761
CLSPN	MCM2	9606.ENSP00000312995	9606.ENSP00000265056	0	0	0	0	0.576	0	0.6	0.714	0.947
CLSPN	TOP2A	9606.ENSP00000312995	9606.ENSP00000411532	0	0	0	0	0.759	0	0	0.449	0.862
CLSPN	BRCA1	9606.ENSP00000312995	9606.ENSP00000418960	0	0	0	0	0.341	0.487	0.6	0.683	0.951
CLSPN	MCM10	9606.ENSP00000312995	9606.ENSP00000418268	0	0	0	0	0.628	0	0.6	0.719	0.954
CWC25	PPIG	9606.ENSP00000478070	9606.ENSP00000260970	0	0	0	0	0.085	0.8	0	0.087	0.818
CWC25	CASC3	9606.ENSP00000478070	9606.ENSP00000264645	0	0	0	0	0	0.8	0.9	0.055	0.979
CWC25	SDE2	9606.ENSP00000478070	9606.ENSP00000272091	0	0	0	0	0.077	0.59	0	0.666	0.862
CWC25	SRRM2	9606.ENSP00000478070	9606.ENSP00000301740	0	0	0	0	0.084	0.868	0	0.734	0.965
DDX21	GLTSCR2	9606.ENSP00000346120	9606.ENSP00000246802	0	0	0	0	0.839	0.059	0	0.093	0.85
DDX21	SRSF2	9606.ENSP00000346120	9606.ENSP00000376276	0	0	0	0	0.312	0	0	0.609	0.719
DDX21	NOLC1	9606.ENSP00000346120	9606.ENSP00000385410	0	0	0	0	0.611	0.086	0	0.287	0.724
DDX21	GNL3	9606.ENSP00000346120	9606.ENSP00000395772	0	0	0	0	0.559	0.165	0.8	0.356	0.946
DKC1	GLTSCR2	9606.ENSP00000358563	9606.ENSP00000246802	0	0	0	0	0.518	0.769	0	0.365	0.923
DKC1	PSME3	9606.ENSP00000358563	9606.ENSP00000293362	0	0	0	0	0.823	0	0	0	0.823
DKC1	NOL7	9606.ENSP00000358563	9606.ENSP00000405674	0	0	0	0	0.765	0	0	0	0.765
DKC1	NOP14	9606.ENSP00000358563	9606.ENSP00000405068	0	0	0	0	0.819	0	0	0.167	0.843
DKC1	EIF4B	9606.ENSP00000358563	9606.ENSP00000388806	0	0	0	0	0.828	0.092	0	0.119	0.851
DKC1	FTSJ3	9606.ENSP00000358563	9606.ENSP00000396673	0.074	0	0	0	0.861	0.358	0	0.254	0.93
DKC1	GNL3	9606.ENSP00000358563	9606.ENSP00000395772	0	0	0	0	0.913	0.817	0	0.231	0.986
DKC1	NOLC1	9606.ENSP00000358563	9606.ENSP00000385410	0	0	0	0	0.862	0.6	0.36	0.944	0.997
DMTN	ADD2	9606.ENSP00000427866	9606.ENSP00000264436	0	0	0	0	0.065	0.394	0.6	0.817	0.952
DMTN	ADD1	9606.ENSP00000427866	9606.ENSP00000264758	0	0	0	0	0.083	0.246	0.6	0.607	0.876
DNTTIP2	GLTSCR2	9606.ENSP00000411010	9606.ENSP00000246802	0	0	0	0	0.81	0	0	0.151	0.832
DNTTIP2	RRP15	9606.ENSP00000411010	9606.ENSP00000355899	0	0	0	0	0.857	0	0	0	0.857
DNTTIP2	NOP14	9606.ENSP00000411010	9606.ENSP00000405068	0	0	0	0	0.45	0.798	0	0.451	0.933
EAF1	TCEA1	9606.ENSP00000380054	9606.ENSP00000428426	0	0	0	0	0.062	0.113	0.8	0.226	0.854
EEF1B2	RPLP2	9606.ENSP00000376056	9606.ENSP00000322419	0.045	0	0	0	0.95	0.895	0	0.412	0.996
EEF1B2	BTF3	9606.ENSP00000376056	9606.ENSP00000369965	0	0	0	0	0.62	0.247	0	0.184	0.746
EEF1B2	NACA	9606.ENSP00000376056	9606.ENSP00000448035	0	0	0	0	0.654	0.056	0	0.415	0.792
EIF4B	EIF4EBP1	9606.ENSP00000388806	9606.ENSP00000340691	0	0	0	0	0.062	0	0	0.762	0.768
EIF4B	DKC1	9606.ENSP00000388806	9606.ENSP00000358563	0	0	0	0	0.828	0.092	0	0.119	0.851
EIF4B	GNL3	9606.ENSP00000388806	9606.ENSP00000395772	0	0	0	0	0.701	0	0	0.079	0.712
EIF4B	TNKS1BP1	9606.ENSP00000388806	9606.ENSP00000437271	0	0	0	0	0	0	0.9	0	0.9
EIF4EBP1	EIF4B	9606.ENSP00000340691	9606.ENSP00000388806	0	0	0	0	0.062	0	0	0.762	0.768
EIF4ENIF1	PATL1	9606.ENSP00000380659	9606.ENSP00000300146	0	0	0	0	0.096	0.258	0	0.759	0.824
EPS15	BIN2	9606.ENSP00000360798	9606.ENSP00000267012	0	0	0	0	0.064	0.246	0.9	0.251	0.94
EPS15	BIN1	9606.ENSP00000360798	9606.ENSP00000316779	0	0	0	0	0.064	0.246	0.9	0.584	0.966
EPS15	SYNJ1	9606.ENSP00000360798	9606.ENSP00000409667	0	0	0	0	0.065	0.378	0.9	0.755	0.983
ERCC6L	TOP2A	9606.ENSP00000334675	9606.ENSP00000411532	0	0	0	0	0.583	0.166	0	0.543	0.827
ERCC6L	MCM10	9606.ENSP00000334675	9606.ENSP00000418268	0	0	0	0	0.782	0.06	0	0.293	0.842
FIP1L1	SRSF9	9606.ENSP00000336752	9606.ENSP00000229390	0	0	0	0	0.145	0.338	0.6	0.135	0.777
FIP1L1	THOC2	9606.ENSP00000336752	9606.ENSP00000245838	0	0	0	0	0.201	0.115	0.6	0.153	0.728
FIP1L1	ZC3H4	9606.ENSP00000336752	9606.ENSP00000253048	0	0	0	0	0.075	0.608	0	0.377	0.754
FIP1L1	NUP35	9606.ENSP00000336752	9606.ENSP00000295119	0	0	0	0	0.146	0	0.9	0	0.911
FIP1L1	SRSF2	9606.ENSP00000336752	9606.ENSP00000376276	0	0	0	0	0.092	0	0.6	0.273	0.713
FIP1L1	SRSF5	9606.ENSP00000336752	9606.ENSP00000452123	0	0	0	0	0.096	0.338	0.6	0.152	0.769
FIP1L1	TPR	9606.ENSP00000336752	9606.ENSP00000356448	0	0	0	0	0.219	0.152	0.9	0	0.927
FOXO3	ZEB1	9606.ENSP00000385824	9606.ENSP00000354487	0	0	0	0	0	0	0.9	0.342	0.931
FOXO3	TNRC6B	9606.ENSP00000385824	9606.ENSP00000401946	0	0	0	0	0	0	0.9	0	0.9
FTSJ3	GLTSCR2	9606.ENSP00000396673	9606.ENSP00000246802	0	0	0	0	0.879	0.833	0	0.412	0.987
FTSJ3	RRP15	9606.ENSP00000396673	9606.ENSP00000355899	0	0	0	0	0.855	0	0.54	0.251	0.946
FTSJ3	DKC1	9606.ENSP00000396673	9606.ENSP00000358563	0.074	0	0	0	0.861	0.358	0	0.254	0.93
FTSJ3	NOLC1	9606.ENSP00000396673	9606.ENSP00000385410	0	0	0	0	0.859	0	0	0.048	0.86
FTSJ3	GNL3	9606.ENSP00000396673	9606.ENSP00000395772	0	0	0	0	0.817	0.9	0	0.552	0.991
FTSJ3	GPATCH4	9606.ENSP00000396673	9606.ENSP00000396441	0	0	0	0	0.673	0.226	0	0	0.736
FTSJ3	NOP14	9606.ENSP00000396673	9606.ENSP00000405068	0	0	0	0	0.887	0.369	0.9	0	0.992
GLTSCR2	NOLC1	9606.ENSP00000246802	9606.ENSP00000385410	0	0	0	0	0.51	0	0	0.561	0.776
GLTSCR2	DNTTIP2	9606.ENSP00000246802	9606.ENSP00000411010	0	0	0	0	0.81	0	0	0.151	0.832
GLTSCR2	DDX21	9606.ENSP00000246802	9606.ENSP00000346120	0	0	0	0	0.839	0.059	0	0.093	0.85
GLTSCR2	NOP14	9606.ENSP00000246802	9606.ENSP00000405068	0	0	0	0	0.872	0	0	0.105	0.881
GLTSCR2	RRP15	9606.ENSP00000246802	9606.ENSP00000355899	0	0	0	0	0.863	0	0	0.229	0.89
GLTSCR2	GNL3	9606.ENSP00000246802	9606.ENSP00000395772	0	0	0	0	0.639	0.632	0	0.432	0.918
GLTSCR2	DKC1	9606.ENSP00000246802	9606.ENSP00000358563	0	0	0	0	0.518	0.769	0	0.365	0.923
GLTSCR2	FTSJ3	9606.ENSP00000246802	9606.ENSP00000396673	0	0	0	0	0.879	0.833	0	0.412	0.987
GNL3	GLTSCR2	9606.ENSP00000395772	9606.ENSP00000246802	0	0	0	0	0.639	0.632	0	0.432	0.918
GNL3	DDX21	9606.ENSP00000395772	9606.ENSP00000346120	0	0	0	0	0.559	0.165	0.8	0.356	0.946
GNL3	RRP15	9606.ENSP00000395772	9606.ENSP00000355899	0	0	0	0	0.822	0	0	0.245	0.86
GNL3	DKC1	9606.ENSP00000395772	9606.ENSP00000358563	0	0	0	0	0.913	0.817	0	0.231	0.986
GNL3	NOLC1	9606.ENSP00000395772	9606.ENSP00000385410	0	0	0	0	0.824	0	0	0.506	0.909
GNL3	EIF4B	9606.ENSP00000395772	9606.ENSP00000388806	0	0	0	0	0.701	0	0	0.079	0.712
GNL3	NOP14	9606.ENSP00000395772	9606.ENSP00000405068	0	0	0	0	0.816	0.386	0	0.101	0.889
GNL3	FTSJ3	9606.ENSP00000395772	9606.ENSP00000396673	0	0	0	0	0.817	0.9	0	0.552	0.991
GPATCH4	FTSJ3	9606.ENSP00000396441	9606.ENSP00000396673	0	0	0	0	0.673	0.226	0	0	0.736
GPBP1	TOP2A	9606.ENSP00000264779	9606.ENSP00000411532	0	0	0	0	0.063	0	0	0.731	0.737
GTF2F1	TAF7	9606.ENSP00000377969	9606.ENSP00000312709	0	0	0	0	0.156	0	0.9	0.712	0.973
GTF2F1	MYB	9606.ENSP00000377969	9606.ENSP00000339992	0	0	0	0	0.084	0	0.9	0.101	0.91
GTF2F1	SRSF2	9606.ENSP00000377969	9606.ENSP00000376276	0	0	0	0	0.304	0	0.6	0.082	0.722
GTF2F1	SFSWAP	9606.ENSP00000377969	9606.ENSP00000437738	0	0	0	0	0.057	0	0	0.736	0.74
GTF2F1	TCEA1	9606.ENSP00000377969	9606.ENSP00000428426	0	0	0	0	0.062	0.925	0.9	0.51	0.996
HEXIM1	HEXIM2	9606.ENSP00000328773	9606.ENSP00000302276	0	0	0	0.879	0	0.872	0	0.944	0.886
HEXIM2	HEXIM1	9606.ENSP00000302276	9606.ENSP00000328773	0	0	0	0.879	0	0.872	0	0.944	0.886
HNRNPAB	HNRNPD	9606.ENSP00000351108	9606.ENSP00000313199	0	0	0	0.957	0.172	0.848	0	0.457	0.871
HNRNPD	SNRPC	9606.ENSP00000313199	9606.ENSP00000244520	0	0	0	0	0.108	0.696	0	0.175	0.757
HNRNPD	PSME3	9606.ENSP00000313199	9606.ENSP00000293362	0	0	0	0	0.161	0.089	0.9	0.148	0.926
HNRNPD	HNRNPAB	9606.ENSP00000313199	9606.ENSP00000351108	0	0	0	0.957	0.172	0.848	0	0.457	0.871
HNRNPD	YBX1	9606.ENSP00000313199	9606.ENSP00000361626	0	0	0	0	0.104	0.538	0	0.806	0.913
INCENP	ANLN	9606.ENSP00000378295	9606.ENSP00000265748	0	0	0	0	0.589	0.27	0	0.566	0.858
INCENP	CENPC	9606.ENSP00000378295	9606.ENSP00000273853	0	0	0	0	0.065	0.161	0	0.717	0.758
INCENP	NUP35	9606.ENSP00000378295	9606.ENSP00000295119	0	0	0	0	0.123	0	0.9	0.074	0.911
INCENP	TPX2	9606.ENSP00000378295	9606.ENSP00000300403	0	0	0	0	0.689	0	0	0.699	0.902
INCENP	TPR	9606.ENSP00000378295	9606.ENSP00000356448	0	0	0	0	0.082	0	0.9	0.123	0.912
INCENP	SUMO1	9606.ENSP00000378295	9606.ENSP00000376077	0	0	0	0	0.067	0	0.9	0.162	0.915
INCENP	TOP2A	9606.ENSP00000378295	9606.ENSP00000411532	0	0	0	0	0.699	0	0	0.264	0.769
INCENP	NUSAP1	9606.ENSP00000378295	9606.ENSP00000453403	0	0	0	0	0.926	0	0	0.277	0.944
KMT2D	SPEN	9606.ENSP00000301067	9606.ENSP00000364912	0	0	0	0	0.654	0.166	0	0.395	0.81
KMT2D	SRRM2	9606.ENSP00000301067	9606.ENSP00000301740	0	0	0	0	0.836	0	0	0.061	0.839
KMT2D	TNRC6B	9606.ENSP00000301067	9606.ENSP00000401946	0	0	0	0	0.098	0	0.9	0	0.905
LARP1	YBX1	9606.ENSP00000336721	9606.ENSP00000361626	0	0	0	0	0.163	0.504	0	0.49	0.77
LARP4B	NUFIP2	9606.ENSP00000482767	9606.ENSP00000225388	0	0	0	0	0.105	0	0.72	0	0.738
LARP4B	ABCF1	9606.ENSP00000482767	9606.ENSP00000313603	0	0	0	0	0.1	0	0.9	0	0.906
LIG1	NASP	9606.ENSP00000263274	9606.ENSP00000255120	0	0	0	0	0.84	0	0	0.043	0.84
LIG1	SLBP	9606.ENSP00000263274	9606.ENSP00000417686	0	0	0	0	0.828	0	0	0	0.828
LIG1	RAD23A	9606.ENSP00000263274	9606.ENSP00000467024	0	0	0	0	0.064	0.726	0	0.393	0.83
LIG1	MCM2	9606.ENSP00000263274	9606.ENSP00000265056	0	0	0	0	0.956	0	0	0.492	0.976
LIN52	TOP2A	9606.ENSP00000451812	9606.ENSP00000411532	0	0	0	0	0	0	0.9	0.064	0.902
MBD1	SUMO1	9606.ENSP00000468785	9606.ENSP00000376077	0	0	0	0	0	0.27	0.8	0.396	0.904
MBD1	ATF7IP	9606.ENSP00000468785	9606.ENSP00000440440	0	0	0	0	0	0.675	0	0.798	0.931
MCM10	RAD51AP1	9606.ENSP00000418268	9606.ENSP00000228843	0	0	0	0	0.783	0	0	0.262	0.833
MCM10	MCM2	9606.ENSP00000418268	9606.ENSP00000265056	0	0	0	0	0.816	0.982	0.6	0.994	0.999
MCM10	TICRR	9606.ENSP00000418268	9606.ENSP00000268138	0	0	0	0	0.565	0	0	0.853	0.933
MCM10	TPX2	9606.ENSP00000418268	9606.ENSP00000300403	0	0	0	0	0.785	0	0	0.218	0.825
MCM10	CLSPN	9606.ENSP00000418268	9606.ENSP00000312995	0	0	0	0	0.628	0	0.6	0.719	0.954
MCM10	CDCA2	9606.ENSP00000418268	9606.ENSP00000328228	0	0	0	0	0.55	0	0	0.39	0.714
MCM10	ERCC6L	9606.ENSP00000418268	9606.ENSP00000334675	0	0	0	0	0.782	0.06	0	0.293	0.842
MCM10	RRM2	9606.ENSP00000418268	9606.ENSP00000353770	0	0	0	0	0.803	0	0	0.473	0.892
MCM10	MKI67	9606.ENSP00000418268	9606.ENSP00000357643	0	0	0	0	0.793	0	0	0.316	0.852
MCM10	TOP2A	9606.ENSP00000418268	9606.ENSP00000411532	0	0	0	0	0.785	0	0	0.38	0.861
MCM10	BRCA1	9606.ENSP00000418268	9606.ENSP00000418960	0	0	0	0	0.567	0.459	0	0.324	0.827
MCM10	NUSAP1	9606.ENSP00000418268	9606.ENSP00000453403	0	0	0	0	0.785	0	0	0.341	0.852
MCM2	RAD51AP1	9606.ENSP00000265056	9606.ENSP00000228843	0	0	0	0	0.694	0	0	0.331	0.787
MCM2	RIF1	9606.ENSP00000265056	9606.ENSP00000243326	0	0	0	0	0.85	0	0	0.206	0.876
MCM2	NASP	9606.ENSP00000265056	9606.ENSP00000255120	0	0	0	0	0.906	0	0	0.363	0.938
MCM2	LIG1	9606.ENSP00000265056	9606.ENSP00000263274	0	0	0	0	0.956	0	0	0.492	0.976
MCM2	MKI67	9606.ENSP00000265056	9606.ENSP00000357643	0	0	0	0	0.593	0	0	0.407	0.748
MCM2	AHCTF1	9606.ENSP00000265056	9606.ENSP00000355465	0	0	0	0	0.072	0	0	0.786	0.793
MCM2	TPX2	9606.ENSP00000265056	9606.ENSP00000300403	0	0	0	0	0.791	0	0	0.325	0.853
MCM2	NUSAP1	9606.ENSP00000265056	9606.ENSP00000453403	0	0	0	0	0.795	0	0	0.394	0.87
MCM2	SLBP	9606.ENSP00000265056	9606.ENSP00000417686	0	0	0	0	0.863	0	0	0.347	0.907
MCM2	TOP2A	9606.ENSP00000265056	9606.ENSP00000411532	0	0	0	0	0.811	0.066	0	0.655	0.934
MCM2	CLSPN	9606.ENSP00000265056	9606.ENSP00000312995	0	0	0	0	0.576	0	0.6	0.714	0.947
MCM2	TICRR	9606.ENSP00000265056	9606.ENSP00000268138	0	0	0	0	0.342	0	0	0.937	0.958
MCM2	RRM2	9606.ENSP00000265056	9606.ENSP00000353770	0	0	0	0	0.927	0	0	0.485	0.961
MCM2	MCM10	9606.ENSP00000265056	9606.ENSP00000418268	0	0	0	0	0.816	0.982	0.6	0.994	0.999
MDC1	RIF1	9606.ENSP00000365588	9606.ENSP00000243326	0	0	0	0	0.066	0.405	0.6	0.262	0.814
MDC1	RNF168	9606.ENSP00000365588	9606.ENSP00000320898	0	0	0	0	0.053	0.172	0.6	0.864	0.951
MDC1	TCF20	9606.ENSP00000365588	9606.ENSP00000352463	0	0	0	0	0.085	0.468	0	0.44	0.704
MDC1	SUMO1	9606.ENSP00000365588	9606.ENSP00000376077	0	0	0	0	0.065	0.222	0.8	0.407	0.902
MDC1	TOP2A	9606.ENSP00000365588	9606.ENSP00000411532	0	0	0	0	0.11	0.107	0	0.9	0.915
MDC1	RNF4	9606.ENSP00000365588	9606.ENSP00000426503	0	0	0	0	0.062	0.27	0.9	0.812	0.985
MDC1	BRCA1	9606.ENSP00000365588	9606.ENSP00000418960	0	0	0	0	0.062	0.873	0.9	0.935	0.999
MED19	MED26	9606.ENSP00000337340	9606.ENSP00000263390	0	0	0	0	0.076	0.871	0.8	0.831	0.995
MED26	TAF7	9606.ENSP00000263390	9606.ENSP00000312709	0	0	0	0	0.065	0.27	0	0.7	0.777
MED26	THRAP3	9606.ENSP00000263390	9606.ENSP00000346634	0	0	0	0	0	0	0.9	0.066	0.902
MED26	MED19	9606.ENSP00000263390	9606.ENSP00000337340	0	0	0	0	0.076	0.871	0.8	0.831	0.995
MKI67	MCM2	9606.ENSP00000357643	9606.ENSP00000265056	0	0	0	0	0.593	0	0	0.407	0.748
MKI67	ANLN	9606.ENSP00000357643	9606.ENSP00000265748	0	0	0	0	0.59	0.27	0	0.287	0.768
MKI67	TICRR	9606.ENSP00000357643	9606.ENSP00000268138	0	0	0	0	0.734	0.27	0	0.089	0.808
MKI67	TPX2	9606.ENSP00000357643	9606.ENSP00000300403	0	0	0	0	0.847	0.27	0	0.4	0.927
MKI67	RRM2	9606.ENSP00000357643	9606.ENSP00000353770	0	0	0	0	0.923	0	0	0.596	0.967
MKI67	CDCA3	9606.ENSP00000357643	9606.ENSP00000442068	0	0	0	0	0.728	0	0	0.364	0.82
MKI67	MCM10	9606.ENSP00000357643	9606.ENSP00000418268	0	0	0	0	0.793	0	0	0.316	0.852
MKI67	NUSAP1	9606.ENSP00000357643	9606.ENSP00000453403	0	0	0	0	0.964	0	0	0.469	0.98
MKI67	TOP2A	9606.ENSP00000357643	9606.ENSP00000411532	0	0	0	0	0.966	0	0	0.66	0.988
MYB	TCF3	9606.ENSP00000339992	9606.ENSP00000262965	0	0	0	0	0.085	0	0.6	0.422	0.77
MYB	TAL1	9606.ENSP00000339992	9606.ENSP00000294339	0	0	0	0	0.062	0.27	0.8	0.75	0.961
MYB	TCF12	9606.ENSP00000339992	9606.ENSP00000388940	0	0	0	0	0.064	0	0.6	0.31	0.719
MYB	GTF2F1	9606.ENSP00000339992	9606.ENSP00000377969	0	0	0	0	0.084	0	0.9	0.101	0.91
NACA	RPLP2	9606.ENSP00000448035	9606.ENSP00000322419	0	0	0	0	0.877	0	0	0.062	0.88
NACA	YBX1	9606.ENSP00000448035	9606.ENSP00000361626	0	0	0	0	0.349	0.79	0	0.052	0.859
NACA	BTF3	9606.ENSP00000448035	9606.ENSP00000369965	0	0	0	0	0.737	0.987	0.54	0.466	0.999
NACA	EEF1B2	9606.ENSP00000448035	9606.ENSP00000376056	0	0	0	0	0.654	0.056	0	0.415	0.792
NASP	LIG1	9606.ENSP00000255120	9606.ENSP00000263274	0	0	0	0	0.84	0	0	0.043	0.84
NASP	MCM2	9606.ENSP00000255120	9606.ENSP00000265056	0	0	0	0	0.906	0	0	0.363	0.938
NASP	SLBP	9606.ENSP00000255120	9606.ENSP00000417686	0	0	0	0	0.924	0	0	0.828	0.986
NOL7	PSME3	9606.ENSP00000405674	9606.ENSP00000293362	0	0	0	0	0.903	0	0	0.124	0.912
NOL7	DKC1	9606.ENSP00000405674	9606.ENSP00000358563	0	0	0	0	0.765	0	0	0	0.765
NOLC1	GLTSCR2	9606.ENSP00000385410	9606.ENSP00000246802	0	0	0	0	0.51	0	0	0.561	0.776
NOLC1	DDX21	9606.ENSP00000385410	9606.ENSP00000346120	0	0	0	0	0.611	0.086	0	0.287	0.724
NOLC1	RRP15	9606.ENSP00000385410	9606.ENSP00000355899	0	0	0	0	0.791	0.126	0	0	0.809
NOLC1	DKC1	9606.ENSP00000385410	9606.ENSP00000358563	0	0	0	0	0.862	0.6	0.36	0.944	0.997
NOLC1	TCOF1	9606.ENSP00000385410	9606.ENSP00000367028	0	0	0	0.552	0.126	0.633	0	0.905	0.8
NOLC1	NOP14	9606.ENSP00000385410	9606.ENSP00000405068	0	0	0	0	0.7	0	0	0.154	0.735
NOLC1	FTSJ3	9606.ENSP00000385410	9606.ENSP00000396673	0	0	0	0	0.859	0	0	0.048	0.86
NOLC1	GNL3	9606.ENSP00000385410	9606.ENSP00000395772	0	0	0	0	0.824	0	0	0.506	0.909
NOP14	GLTSCR2	9606.ENSP00000405068	9606.ENSP00000246802	0	0	0	0	0.872	0	0	0.105	0.881
NOP14	RRP15	9606.ENSP00000405068	9606.ENSP00000355899	0	0	0	0	0.831	0	0	0.308	0.878
NOP14	DKC1	9606.ENSP00000405068	9606.ENSP00000358563	0	0	0	0	0.819	0	0	0.167	0.843
NOP14	NOLC1	9606.ENSP00000405068	9606.ENSP00000385410	0	0	0	0	0.7	0	0	0.154	0.735
NOP14	GNL3	9606.ENSP00000405068	9606.ENSP00000395772	0	0	0	0	0.816	0.386	0	0.101	0.889
NOP14	FTSJ3	9606.ENSP00000405068	9606.ENSP00000396673	0	0	0	0	0.887	0.369	0.9	0	0.992
NOP14	DNTTIP2	9606.ENSP00000405068	9606.ENSP00000411010	0	0	0	0	0.45	0.798	0	0.451	0.933
NUCKS1	PHAX	9606.ENSP00000356110	9606.ENSP00000297540	0	0	0	0	0.059	0.835	0	0	0.838
NUFIP2	LARP4B	9606.ENSP00000225388	9606.ENSP00000482767	0	0	0	0	0.105	0	0.72	0	0.738
NUFIP2	ABCF1	9606.ENSP00000225388	9606.ENSP00000313603	0	0	0	0	0.079	0	0.72	0.136	0.757
NUP35	TOP2A	9606.ENSP00000295119	9606.ENSP00000411532	0	0	0	0	0.066	0	0.9	0.073	0.905
NUP35	PHAX	9606.ENSP00000295119	9606.ENSP00000297540	0	0	0	0	0.092	0	0.9	0	0.905
NUP35	TPR	9606.ENSP00000295119	9606.ENSP00000356448	0	0	0	0	0.127	0	0.8	0.505	0.906
NUP35	FIP1L1	9606.ENSP00000295119	9606.ENSP00000336752	0	0	0	0	0.146	0	0.9	0	0.911
NUP35	INCENP	9606.ENSP00000295119	9606.ENSP00000378295	0	0	0	0	0.123	0	0.9	0.074	0.911
NUP35	SLBP	9606.ENSP00000295119	9606.ENSP00000417686	0	0	0	0	0.233	0	0.9	0	0.92
NUP35	AHCTF1	9606.ENSP00000295119	9606.ENSP00000355465	0	0	0	0	0.081	0.39	0.6	0.826	0.955
NUSAP1	RAD51AP1	9606.ENSP00000453403	9606.ENSP00000228843	0	0	0	0	0.796	0	0	0.352	0.862
NUSAP1	MCM2	9606.ENSP00000453403	9606.ENSP00000265056	0	0	0	0	0.795	0	0	0.394	0.87
NUSAP1	ANLN	9606.ENSP00000453403	9606.ENSP00000265748	0	0	0	0	0.811	0	0	0.363	0.874
NUSAP1	TMPO	9606.ENSP00000453403	9606.ENSP00000266732	0	0	0	0	0.56	0.198	0	0.326	0.741
NUSAP1	TPX2	9606.ENSP00000453403	9606.ENSP00000300403	0	0	0	0	0.913	0	0	0.661	0.969
NUSAP1	CDCA2	9606.ENSP00000453403	9606.ENSP00000328228	0	0	0	0	0.702	0	0	0.403	0.814
NUSAP1	RRM2	9606.ENSP00000453403	9606.ENSP00000353770	0	0	0	0	0.924	0	0	0.595	0.968
NUSAP1	MKI67	9606.ENSP00000453403	9606.ENSP00000357643	0	0	0	0	0.964	0	0	0.469	0.98
NUSAP1	INCENP	9606.ENSP00000453403	9606.ENSP00000378295	0	0	0	0	0.926	0	0	0.277	0.944
NUSAP1	TOP2A	9606.ENSP00000453403	9606.ENSP00000411532	0	0	0	0	0.966	0	0	0.649	0.987
NUSAP1	MCM10	9606.ENSP00000453403	9606.ENSP00000418268	0	0	0	0	0.785	0	0	0.341	0.852
NUSAP1	CDCA3	9606.ENSP00000453403	9606.ENSP00000442068	0	0	0	0	0.883	0	0	0.511	0.94
PATL1	EIF4ENIF1	9606.ENSP00000300146	9606.ENSP00000380659	0	0	0	0	0.096	0.258	0	0.759	0.824
PHAX	NUP35	9606.ENSP00000297540	9606.ENSP00000295119	0	0	0	0	0.092	0	0.9	0	0.905
PHAX	NUCKS1	9606.ENSP00000297540	9606.ENSP00000356110	0	0	0	0	0.059	0.835	0	0	0.838
PHAX	TPR	9606.ENSP00000297540	9606.ENSP00000356448	0	0	0	0	0.086	0	0.9	0	0.904
PHAX	SRRT	9606.ENSP00000297540	9606.ENSP00000480421	0	0	0	0	0.132	0	0.8	0.977	0.995
POLR3G	BDP1	9606.ENSP00000382058	9606.ENSP00000351575	0	0	0	0	0	0	0.6	0.529	0.803
PPIG	ATRX	9606.ENSP00000260970	9606.ENSP00000362441	0	0	0	0	0.254	0.077	0	0.697	0.773
PPIG	CASC3	9606.ENSP00000260970	9606.ENSP00000264645	0	0	0	0	0	0.8	0	0.043	0.8
PPIG	CWC25	9606.ENSP00000260970	9606.ENSP00000478070	0	0	0	0	0.085	0.8	0	0.087	0.818
PPIG	SRRM2	9606.ENSP00000260970	9606.ENSP00000301740	0	0	0	0	0.126	0.826	0	0.099	0.851
PSME3	BCLAF1	9606.ENSP00000293362	9606.ENSP00000435210	0	0	0	0	0.273	0.27	0	0.562	0.747
PSME3	DKC1	9606.ENSP00000293362	9606.ENSP00000358563	0	0	0	0	0.823	0	0	0	0.823
PSME3	NOL7	9606.ENSP00000293362	9606.ENSP00000405674	0	0	0	0	0.903	0	0	0.124	0.912
PSME3	HNRNPD	9606.ENSP00000293362	9606.ENSP00000313199	0	0	0	0	0.161	0.089	0.9	0.148	0.926
RAD23A	LIG1	9606.ENSP00000467024	9606.ENSP00000263274	0	0	0	0	0.064	0.726	0	0.393	0.83
RAD23A	SUMO1	9606.ENSP00000467024	9606.ENSP00000376077	0	0	0	0	0.097	0.076	0.6	0.346	0.752
RAD51AP1	MCM2	9606.ENSP00000228843	9606.ENSP00000265056	0	0	0	0	0.694	0	0	0.331	0.787
RAD51AP1	ANLN	9606.ENSP00000228843	9606.ENSP00000265748	0	0	0	0	0.778	0	0	0.134	0.799
RAD51AP1	RRM2	9606.ENSP00000228843	9606.ENSP00000353770	0	0	0	0	0.792	0	0	0.198	0.826
RAD51AP1	MCM10	9606.ENSP00000228843	9606.ENSP00000418268	0	0	0	0	0.783	0	0	0.262	0.833
RAD51AP1	TPX2	9606.ENSP00000228843	9606.ENSP00000300403	0	0	0	0	0.802	0	0	0.218	0.838
RAD51AP1	BRCA1	9606.ENSP00000228843	9606.ENSP00000418960	0	0	0	0	0.368	0	0.6	0.459	0.851
RAD51AP1	NUSAP1	9606.ENSP00000228843	9606.ENSP00000453403	0	0	0	0	0.796	0	0	0.352	0.862
RAD51AP1	TOP2A	9606.ENSP00000228843	9606.ENSP00000411532	0	0	0	0	0.824	0	0	0.525	0.913
RAI1	TCF20	9606.ENSP00000323074	9606.ENSP00000352463	0	0	0	0.576	0.087	0.647	0	0.598	0.746
RIF1	RNF168	9606.ENSP00000243326	9606.ENSP00000320898	0	0	0	0	0.091	0	0.6	0.305	0.725
RIF1	MDC1	9606.ENSP00000243326	9606.ENSP00000365588	0	0	0	0	0.066	0.405	0.6	0.262	0.814
RIF1	BDP1	9606.ENSP00000243326	9606.ENSP00000351575	0	0	0	0	0.831	0	0	0	0.831
RIF1	BRCA1	9606.ENSP00000243326	9606.ENSP00000418960	0	0	0	0	0.092	0.405	0.65	0.298	0.849
RIF1	MCM2	9606.ENSP00000243326	9606.ENSP00000265056	0	0	0	0	0.85	0	0	0.206	0.876
RNF168	RIF1	9606.ENSP00000320898	9606.ENSP00000243326	0	0	0	0	0.091	0	0.6	0.305	0.725
RNF168	SUMO1	9606.ENSP00000320898	9606.ENSP00000376077	0	0	0	0	0	0.27	0.8	0.416	0.907
RNF168	MDC1	9606.ENSP00000320898	9606.ENSP00000365588	0	0	0	0	0.053	0.172	0.6	0.864	0.951
RNF168	RNF4	9606.ENSP00000320898	9606.ENSP00000426503	0	0	0	0	0.064	0.27	0.9	0.518	0.962
RNF168	BRCA1	9606.ENSP00000320898	9606.ENSP00000418960	0	0	0	0	0.082	0.647	0.6	0.837	0.976
RNF4	RNF168	9606.ENSP00000426503	9606.ENSP00000320898	0	0	0	0	0.064	0.27	0.9	0.518	0.962
RNF4	TCF20	9606.ENSP00000426503	9606.ENSP00000352463	0	0	0	0	0.062	0.486	0	0.716	0.851
RNF4	MDC1	9606.ENSP00000426503	9606.ENSP00000365588	0	0	0	0	0.062	0.27	0.9	0.812	0.985
RNF4	SUMO1	9606.ENSP00000426503	9606.ENSP00000376077	0	0	0	0	0	0.9	0.9	0.824	0.998
RNF4	BRCA1	9606.ENSP00000426503	9606.ENSP00000418960	0	0	0	0	0	0	0.9	0.469	0.944
RPLP2	BTF3	9606.ENSP00000322419	9606.ENSP00000369965	0	0	0	0	0.595	0.567	0	0.101	0.828
RPLP2	NACA	9606.ENSP00000322419	9606.ENSP00000448035	0	0	0	0	0.877	0	0	0.062	0.88
RPLP2	SERBP1	9606.ENSP00000322419	9606.ENSP00000360034	0	0	0	0	0.201	0.955	0	0	0.962
RPLP2	EEF1B2	9606.ENSP00000322419	9606.ENSP00000376056	0.045	0	0	0	0.95	0.895	0	0.412	0.996
RRM2	RAD51AP1	9606.ENSP00000353770	9606.ENSP00000228843	0	0	0	0	0.792	0	0	0.198	0.826
RRM2	MCM2	9606.ENSP00000353770	9606.ENSP00000265056	0	0	0	0	0.927	0	0	0.485	0.961
RRM2	ANLN	9606.ENSP00000353770	9606.ENSP00000265748	0	0	0	0	0.794	0	0	0.369	0.865
RRM2	TPX2	9606.ENSP00000353770	9606.ENSP00000300403	0	0	0	0	0.923	0	0	0.414	0.953
RRM2	BRCA1	9606.ENSP00000353770	9606.ENSP00000418960	0	0	0	0	0.409	0	0	0.525	0.708
RRM2	MCM10	9606.ENSP00000353770	9606.ENSP00000418268	0	0	0	0	0.803	0	0	0.473	0.892
RRM2	CDCA3	9606.ENSP00000353770	9606.ENSP00000442068	0	0	0	0	0.861	0	0	0.282	0.896
RRM2	MKI67	9606.ENSP00000353770	9606.ENSP00000357643	0	0	0	0	0.923	0	0	0.596	0.967
RRM2	NUSAP1	9606.ENSP00000353770	9606.ENSP00000453403	0	0	0	0	0.924	0	0	0.595	0.968
RRM2	TOP2A	9606.ENSP00000353770	9606.ENSP00000411532	0	0	0	0	0.935	0	0	0.671	0.978
RRP15	GLTSCR2	9606.ENSP00000355899	9606.ENSP00000246802	0	0	0	0	0.863	0	0	0.229	0.89
RRP15	NOLC1	9606.ENSP00000355899	9606.ENSP00000385410	0	0	0	0	0.791	0.126	0	0	0.809
RRP15	DNTTIP2	9606.ENSP00000355899	9606.ENSP00000411010	0	0	0	0	0.857	0	0	0	0.857
RRP15	GNL3	9606.ENSP00000355899	9606.ENSP00000395772	0	0	0	0	0.822	0	0	0.245	0.86
RRP15	NOP14	9606.ENSP00000355899	9606.ENSP00000405068	0	0	0	0	0.831	0	0	0.308	0.878
RRP15	FTSJ3	9606.ENSP00000355899	9606.ENSP00000396673	0	0	0	0	0.855	0	0.54	0.251	0.946
RYBP	YAF2	9606.ENSP00000419494	9606.ENSP00000328004	0	0	0	0.932	0	0.632	0.3	0.943	0.748
RYBP	BCOR	9606.ENSP00000419494	9606.ENSP00000367705	0	0	0	0	0	0.887	0	0.927	0.991
SAFB	ACIN1	9606.ENSP00000467423	9606.ENSP00000262710	0	0	0	0	0.287	0.414	0	0.372	0.715
SAFB	SUMO1	9606.ENSP00000467423	9606.ENSP00000376077	0	0	0	0	0.272	0.109	0.8	0.143	0.873
SART1	SNRPC	9606.ENSP00000310448	9606.ENSP00000244520	0	0	0	0	0.088	0.828	0	0.472	0.91
SART1	SRRM2	9606.ENSP00000310448	9606.ENSP00000301740	0	0	0	0	0.107	0.411	0.9	0.341	0.96
SDE2	CWC25	9606.ENSP00000272091	9606.ENSP00000478070	0	0	0	0	0.077	0.59	0	0.666	0.862
SDE2	SRRM2	9606.ENSP00000272091	9606.ENSP00000301740	0	0	0	0	0.045	0.868	0	0	0.868
SERBP1	RPLP2	9606.ENSP00000360034	9606.ENSP00000322419	0	0	0	0	0.201	0.955	0	0	0.962
SF1	SNRPC	9606.ENSP00000366604	9606.ENSP00000244520	0	0	0	0	0.303	0.16	0	0.774	0.856
SF1	SRSF2	9606.ENSP00000366604	9606.ENSP00000376276	0	0	0	0	0.475	0.105	0	0.506	0.747
SF1	SRSF5	9606.ENSP00000366604	9606.ENSP00000452123	0	0	0	0	0.316	0.423	0	0.46	0.768
SFSWAP	GTF2F1	9606.ENSP00000437738	9606.ENSP00000377969	0	0	0	0	0.057	0	0	0.736	0.74
SKA3	TPX2	9606.ENSP00000319417	9606.ENSP00000300403	0	0	0	0	0.832	0	0	0.18	0.857
SKA3	CDCA2	9606.ENSP00000319417	9606.ENSP00000328228	0	0	0	0	0.594	0	0	0.422	0.756
SKA3	CDCA3	9606.ENSP00000319417	9606.ENSP00000442068	0	0	0	0	0.745	0	0	0.113	0.764
SKA3	TOP2A	9606.ENSP00000319417	9606.ENSP00000411532	0	0	0	0	0.764	0	0	0.233	0.811
SLBP	NASP	9606.ENSP00000417686	9606.ENSP00000255120	0	0	0	0	0.924	0	0	0.828	0.986
SLBP	LIG1	9606.ENSP00000417686	9606.ENSP00000263274	0	0	0	0	0.828	0	0	0	0.828
SLBP	MCM2	9606.ENSP00000417686	9606.ENSP00000265056	0	0	0	0	0.863	0	0	0.347	0.907
SLBP	NUP35	9606.ENSP00000417686	9606.ENSP00000295119	0	0	0	0	0.233	0	0.9	0	0.92
SLBP	TPR	9606.ENSP00000417686	9606.ENSP00000356448	0	0	0	0	0.065	0	0.9	0.063	0.904
SLBP	YBX1	9606.ENSP00000417686	9606.ENSP00000361626	0	0	0	0	0.062	0	0.72	0.1	0.742
SMNDC1	SRSF9	9606.ENSP00000358616	9606.ENSP00000229390	0	0	0	0	0.07	0.698	0	0.204	0.757
SMNDC1	CFDP1	9606.ENSP00000358616	9606.ENSP00000283882	0	0	0	0	0.761	0	0	0	0.761
SNRPC	HNRNPD	9606.ENSP00000244520	9606.ENSP00000313199	0	0	0	0	0.108	0.696	0	0.175	0.757
SNRPC	SF1	9606.ENSP00000244520	9606.ENSP00000366604	0	0	0	0	0.303	0.16	0	0.774	0.856
SNRPC	SART1	9606.ENSP00000244520	9606.ENSP00000310448	0	0	0	0	0.088	0.828	0	0.472	0.91
SNRPC	SRSF2	9606.ENSP00000244520	9606.ENSP00000376276	0	0	0	0	0.342	0	0.9	0.345	0.953
SOX6	BCL11A	9606.ENSP00000379644	9606.ENSP00000338774	0	0	0	0	0.066	0.101	0	0.917	0.925
SP3	SUMO1	9606.ENSP00000310301	9606.ENSP00000376077	0	0	0	0	0.133	0.296	0.8	0.223	0.892
SPEN	KMT2D	9606.ENSP00000364912	9606.ENSP00000301067	0	0	0	0	0.654	0.166	0	0.395	0.81
SRRM1	SRSF9	9606.ENSP00000326261	9606.ENSP00000229390	0	0	0	0	0.083	0.767	0.6	0.551	0.956
SRRM1	ACIN1	9606.ENSP00000326261	9606.ENSP00000262710	0	0	0	0	0.318	0.39	0	0.447	0.75
SRRM1	CASC3	9606.ENSP00000326261	9606.ENSP00000264645	0	0	0	0	0.064	0	0.6	0.531	0.809
SRRM1	SRRM2	9606.ENSP00000326261	9606.ENSP00000301740	0	0	0	0	0.267	0.936	0.8	0.924	0.999
SRRM1	SRSF5	9606.ENSP00000326261	9606.ENSP00000452123	0	0	0	0	0.149	0.438	0.6	0.664	0.927
SRRM1	SRSF2	9606.ENSP00000326261	9606.ENSP00000376276	0	0	0	0	0.383	0.794	0.6	0.628	0.978
SRRM2	PPIG	9606.ENSP00000301740	9606.ENSP00000260970	0	0	0	0	0.126	0.826	0	0.099	0.851
SRRM2	ACIN1	9606.ENSP00000301740	9606.ENSP00000262710	0	0	0	0	0.775	0.681	0	0.432	0.955
SRRM2	CASC3	9606.ENSP00000301740	9606.ENSP00000264645	0	0	0	0	0.065	0.8	0	0.367	0.871
SRRM2	SDE2	9606.ENSP00000301740	9606.ENSP00000272091	0	0	0	0	0.045	0.868	0	0	0.868
SRRM2	KMT2D	9606.ENSP00000301740	9606.ENSP00000301067	0	0	0	0	0.836	0	0	0.061	0.839
SRRM2	SRSF5	9606.ENSP00000301740	9606.ENSP00000452123	0	0	0	0	0.132	0.56	0	0.607	0.836
SRRM2	ZC3H18	9606.ENSP00000301740	9606.ENSP00000416951	0	0	0	0	0.118	0.823	0	0	0.837
SRRM2	SART1	9606.ENSP00000301740	9606.ENSP00000310448	0	0	0	0	0.107	0.411	0.9	0.341	0.96
SRRM2	CWC25	9606.ENSP00000301740	9606.ENSP00000478070	0	0	0	0	0.084	0.868	0	0.734	0.965
SRRM2	SRRM1	9606.ENSP00000301740	9606.ENSP00000326261	0	0	0	0	0.267	0.936	0.8	0.924	0.999
SRRT	PHAX	9606.ENSP00000480421	9606.ENSP00000297540	0	0	0	0	0.132	0	0.8	0.977	0.995
SRRT	C17orf85	9606.ENSP00000480421	9606.ENSP00000373657	0	0	0	0	0.142	0.477	0	0.727	0.867
SRRT	ZC3H18	9606.ENSP00000480421	9606.ENSP00000416951	0	0	0	0	0.194	0.678	0	0.336	0.812
SRSF2	SRSF9	9606.ENSP00000376276	9606.ENSP00000229390	0	0	0	0	0.272	0.884	0.8	0.789	0.996
SRSF2	SNRPC	9606.ENSP00000376276	9606.ENSP00000244520	0	0	0	0	0.342	0	0.9	0.345	0.953
SRSF2	THOC2	9606.ENSP00000376276	9606.ENSP00000245838	0	0	0	0	0.099	0	0.6	0.292	0.722
SRSF2	CASC3	9606.ENSP00000376276	9606.ENSP00000264645	0	0	0	0	0.063	0	0.6	0.329	0.726
SRSF2	SRRM1	9606.ENSP00000376276	9606.ENSP00000326261	0	0	0	0	0.383	0.794	0.6	0.628	0.978
SRSF2	FIP1L1	9606.ENSP00000376276	9606.ENSP00000336752	0	0	0	0	0.092	0	0.6	0.273	0.713
SRSF2	DDX21	9606.ENSP00000376276	9606.ENSP00000346120	0	0	0	0	0.312	0	0	0.609	0.719
SRSF2	YBX1	9606.ENSP00000376276	9606.ENSP00000361626	0	0	0	0	0.108	0	0.8	0.358	0.875
SRSF2	SF1	9606.ENSP00000376276	9606.ENSP00000366604	0	0	0	0	0.475	0.105	0	0.506	0.747
SRSF2	ZC3H11A	9606.ENSP00000376276	9606.ENSP00000438527	0	0	0	0	0.153	0	0.6	0.201	0.705
SRSF2	GTF2F1	9606.ENSP00000376276	9606.ENSP00000377969	0	0	0	0	0.304	0	0.6	0.082	0.722
SRSF2	SRSF5	9606.ENSP00000376276	9606.ENSP00000452123	0	0	0	0.754	0.289	0.255	0.8	0.884	0.909
SRSF5	SRSF9	9606.ENSP00000452123	9606.ENSP00000229390	0	0	0	0.816	0.09	0.078	0.8	0.827	0.845
SRSF5	THOC2	9606.ENSP00000452123	9606.ENSP00000245838	0	0	0	0	0.094	0.103	0.6	0.249	0.723
SRSF5	SRRM2	9606.ENSP00000452123	9606.ENSP00000301740	0	0	0	0	0.132	0.56	0	0.607	0.836
SRSF5	SRRM1	9606.ENSP00000452123	9606.ENSP00000326261	0	0	0	0	0.149	0.438	0.6	0.664	0.927
SRSF5	FIP1L1	9606.ENSP00000452123	9606.ENSP00000336752	0	0	0	0	0.096	0.338	0.6	0.152	0.769
SRSF5	SF1	9606.ENSP00000452123	9606.ENSP00000366604	0	0	0	0	0.316	0.423	0	0.46	0.768
SRSF5	SRSF2	9606.ENSP00000452123	9606.ENSP00000376276	0	0	0	0.754	0.289	0.255	0.8	0.884	0.909
SRSF9	THOC2	9606.ENSP00000229390	9606.ENSP00000245838	0	0	0	0	0.165	0.063	0.6	0.172	0.706
SRSF9	SMNDC1	9606.ENSP00000229390	9606.ENSP00000358616	0	0	0	0	0.07	0.698	0	0.204	0.757
SRSF9	YBX1	9606.ENSP00000229390	9606.ENSP00000361626	0.051	0	0	0	0.102	0.473	0	0.555	0.774
SRSF9	FIP1L1	9606.ENSP00000229390	9606.ENSP00000336752	0	0	0	0	0.145	0.338	0.6	0.135	0.777
SRSF9	SRSF5	9606.ENSP00000229390	9606.ENSP00000452123	0	0	0	0.816	0.09	0.078	0.8	0.827	0.845
SRSF9	CASC3	9606.ENSP00000229390	9606.ENSP00000264645	0	0	0	0	0.056	0.7	0.6	0.368	0.918
SRSF9	SRRM1	9606.ENSP00000229390	9606.ENSP00000326261	0	0	0	0	0.083	0.767	0.6	0.551	0.956
SRSF9	SRSF2	9606.ENSP00000229390	9606.ENSP00000376276	0	0	0	0	0.272	0.884	0.8	0.789	0.996
SUMO1	SP3	9606.ENSP00000376077	9606.ENSP00000310301	0	0	0	0	0.133	0.296	0.8	0.223	0.892
SUMO1	RNF168	9606.ENSP00000376077	9606.ENSP00000320898	0	0	0	0	0	0.27	0.8	0.416	0.907
SUMO1	ZEB1	9606.ENSP00000376077	9606.ENSP00000354487	0	0	0	0	0	0.105	0.9	0.119	0.914
SUMO1	TPR	9606.ENSP00000376077	9606.ENSP00000356448	0	0	0	0	0.183	0.077	0.6	0.264	0.748
SUMO1	MDC1	9606.ENSP00000376077	9606.ENSP00000365588	0	0	0	0	0.065	0.222	0.8	0.407	0.902
SUMO1	RAD23A	9606.ENSP00000376077	9606.ENSP00000467024	0	0	0	0	0.097	0.076	0.6	0.346	0.752
SUMO1	SAFB	9606.ENSP00000376077	9606.ENSP00000467423	0	0	0	0	0.272	0.109	0.8	0.143	0.873
SUMO1	MBD1	9606.ENSP00000376077	9606.ENSP00000468785	0	0	0	0	0	0.27	0.8	0.396	0.904
SUMO1	TOP2B	9606.ENSP00000376077	9606.ENSP00000396704	0	0	0	0	0.068	0.366	0.8	0.346	0.912
SUMO1	INCENP	9606.ENSP00000376077	9606.ENSP00000378295	0	0	0	0	0.067	0	0.9	0.162	0.915
SUMO1	TOP2A	9606.ENSP00000376077	9606.ENSP00000411532	0	0	0	0	0.064	0.382	0.8	0.416	0.923
SUMO1	BRCA1	9606.ENSP00000376077	9606.ENSP00000418960	0	0	0	0	0.062	0.661	0.8	0.547	0.967
SUMO1	RNF4	9606.ENSP00000376077	9606.ENSP00000426503	0	0	0	0	0	0.9	0.9	0.824	0.998
SYNJ1	BIN2	9606.ENSP00000409667	9606.ENSP00000267012	0	0	0	0	0.053	0.104	0.9	0.146	0.917
SYNJ1	BIN1	9606.ENSP00000409667	9606.ENSP00000316779	0	0	0	0	0.053	0.325	0.9	0.548	0.967
SYNJ1	EPS15	9606.ENSP00000409667	9606.ENSP00000360798	0	0	0	0	0.065	0.378	0.9	0.755	0.983
TAF7	MED26	9606.ENSP00000312709	9606.ENSP00000263390	0	0	0	0	0.065	0.27	0	0.7	0.777
TAF7	C17orf49	9606.ENSP00000312709	9606.ENSP00000448598	0	0	0	0	0	0	0.9	0	0.9
TAF7	TCEA1	9606.ENSP00000312709	9606.ENSP00000428426	0	0	0	0	0.11	0	0.9	0.125	0.915
TAF7	GTF2F1	9606.ENSP00000312709	9606.ENSP00000377969	0	0	0	0	0.156	0	0.9	0.712	0.973
TAL1	TCF3	9606.ENSP00000294339	9606.ENSP00000262965	0	0	0	0	0.062	0.897	0.6	0.988	0.999
TAL1	MYB	9606.ENSP00000294339	9606.ENSP00000339992	0	0	0	0	0.062	0.27	0.8	0.75	0.961
TAL1	TCF12	9606.ENSP00000294339	9606.ENSP00000388940	0	0	0	0	0.062	0.883	0.6	0.791	0.989
TCEA1	TAF7	9606.ENSP00000428426	9606.ENSP00000312709	0	0	0	0	0.11	0	0.9	0.125	0.915
TCEA1	GTF2F1	9606.ENSP00000428426	9606.ENSP00000377969	0	0	0	0	0.062	0.925	0.9	0.51	0.996
TCEA1	EAF1	9606.ENSP00000428426	9606.ENSP00000380054	0	0	0	0	0.062	0.113	0.8	0.226	0.854
TCF12	TAL1	9606.ENSP00000388940	9606.ENSP00000294339	0	0	0	0	0.062	0.883	0.6	0.791	0.989
TCF12	MYB	9606.ENSP00000388940	9606.ENSP00000339992	0	0	0	0	0.064	0	0.6	0.31	0.719
TCF20	RAI1	9606.ENSP00000352463	9606.ENSP00000323074	0	0	0	0.576	0.087	0.647	0	0.598	0.746
TCF20	MDC1	9606.ENSP00000352463	9606.ENSP00000365588	0	0	0	0	0.085	0.468	0	0.44	0.704
TCF20	RNF4	9606.ENSP00000352463	9606.ENSP00000426503	0	0	0	0	0.062	0.486	0	0.716	0.851
TCF3	MYB	9606.ENSP00000262965	9606.ENSP00000339992	0	0	0	0	0.085	0	0.6	0.422	0.77
TCF3	TAL1	9606.ENSP00000262965	9606.ENSP00000294339	0	0	0	0	0.062	0.897	0.6	0.988	0.999
TCOF1	NOLC1	9606.ENSP00000367028	9606.ENSP00000385410	0	0	0	0.552	0.126	0.633	0	0.905	0.8
THOC2	SRSF9	9606.ENSP00000245838	9606.ENSP00000229390	0	0	0	0	0.165	0.063	0.6	0.172	0.706
THOC2	SRSF2	9606.ENSP00000245838	9606.ENSP00000376276	0	0	0	0	0.099	0	0.6	0.292	0.722
THOC2	SRSF5	9606.ENSP00000245838	9606.ENSP00000452123	0	0	0	0	0.094	0.103	0.6	0.249	0.723
THOC2	FIP1L1	9606.ENSP00000245838	9606.ENSP00000336752	0	0	0	0	0.201	0.115	0.6	0.153	0.728
THOC2	ATRX	9606.ENSP00000245838	9606.ENSP00000362441	0	0	0	0	0.683	0.077	0	0.186	0.741
THOC2	TPR	9606.ENSP00000245838	9606.ENSP00000356448	0	0	0	0	0.546	0	0	0.486	0.756
THOC2	ZC3H11A	9606.ENSP00000245838	9606.ENSP00000438527	0	0	0	0	0.187	0.387	0.6	0.293	0.84
THOC2	C17orf85	9606.ENSP00000245838	9606.ENSP00000373657	0	0	0	0	0.145	0.673	0	0.54	0.86
THRAP3	MED26	9606.ENSP00000346634	9606.ENSP00000263390	0	0	0	0	0	0	0.9	0.066	0.902
THRAP3	BCLAF1	9606.ENSP00000346634	9606.ENSP00000435210	0	0	0	0.806	0.228	0.843	0.54	0.959	0.95
TICRR	MCM2	9606.ENSP00000268138	9606.ENSP00000265056	0	0	0	0	0.342	0	0	0.937	0.958
TICRR	MKI67	9606.ENSP00000268138	9606.ENSP00000357643	0	0	0	0	0.734	0.27	0	0.089	0.808
TICRR	MCM10	9606.ENSP00000268138	9606.ENSP00000418268	0	0	0	0	0.565	0	0	0.853	0.933
TMPO	NUSAP1	9606.ENSP00000266732	9606.ENSP00000453403	0	0	0	0	0.56	0.198	0	0.326	0.741
TNKS1BP1	EIF4B	9606.ENSP00000437271	9606.ENSP00000388806	0	0	0	0	0	0	0.9	0	0.9
TNRC6B	KMT2D	9606.ENSP00000401946	9606.ENSP00000301067	0	0	0	0	0.098	0	0.9	0	0.905
TNRC6B	FOXO3	9606.ENSP00000401946	9606.ENSP00000385824	0	0	0	0	0	0	0.9	0	0.9
TOP2A	RAD51AP1	9606.ENSP00000411532	9606.ENSP00000228843	0	0	0	0	0.824	0	0	0.525	0.913
TOP2A	GPBP1	9606.ENSP00000411532	9606.ENSP00000264779	0	0	0	0	0.063	0	0	0.731	0.737
TOP2A	MCM2	9606.ENSP00000411532	9606.ENSP00000265056	0	0	0	0	0.811	0.066	0	0.655	0.934
TOP2A	ANLN	9606.ENSP00000411532	9606.ENSP00000265748	0	0	0	0	0.834	0.27	0	0.469	0.93
TOP2A	NUP35	9606.ENSP00000411532	9606.ENSP00000295119	0	0	0	0	0.066	0	0.9	0.073	0.905
TOP2A	TPX2	9606.ENSP00000411532	9606.ENSP00000300403	0	0	0	0	0.993	0	0	0.604	0.997
TOP2A	CLSPN	9606.ENSP00000411532	9606.ENSP00000312995	0	0	0	0	0.759	0	0	0.449	0.862
TOP2A	SKA3	9606.ENSP00000411532	9606.ENSP00000319417	0	0	0	0	0.764	0	0	0.233	0.811
TOP2A	CDCA2	9606.ENSP00000411532	9606.ENSP00000328228	0	0	0	0	0.652	0	0	0.266	0.734
TOP2A	ERCC6L	9606.ENSP00000411532	9606.ENSP00000334675	0	0	0	0	0.583	0.166	0	0.543	0.827
TOP2A	RRM2	9606.ENSP00000411532	9606.ENSP00000353770	0	0	0	0	0.935	0	0	0.671	0.978
TOP2A	TPR	9606.ENSP00000411532	9606.ENSP00000356448	0	0	0	0	0.221	0.146	0.9	0.045	0.928
TOP2A	MKI67	9606.ENSP00000411532	9606.ENSP00000357643	0	0	0	0	0.966	0	0	0.66	0.988
TOP2A	MDC1	9606.ENSP00000411532	9606.ENSP00000365588	0	0	0	0	0.11	0.107	0	0.9	0.915
TOP2A	SUMO1	9606.ENSP00000411532	9606.ENSP00000376077	0	0	0	0	0.064	0.382	0.8	0.416	0.923
TOP2A	INCENP	9606.ENSP00000411532	9606.ENSP00000378295	0	0	0	0	0.699	0	0	0.264	0.769
TOP2A	TOP2B	9606.ENSP00000411532	9606.ENSP00000396704	0	0	0	0.972	0.062	0.489	0.8	0.805	0.898
TOP2A	MCM10	9606.ENSP00000411532	9606.ENSP00000418268	0	0	0	0	0.785	0	0	0.38	0.861
TOP2A	LIN52	9606.ENSP00000411532	9606.ENSP00000451812	0	0	0	0	0	0	0.9	0.064	0.902
TOP2A	BRCA1	9606.ENSP00000411532	9606.ENSP00000418960	0	0	0	0	0.676	0.383	0	0.567	0.906
TOP2A	CDCA3	9606.ENSP00000411532	9606.ENSP00000442068	0	0	0	0	0.943	0	0	0.464	0.968
TOP2A	NUSAP1	9606.ENSP00000411532	9606.ENSP00000453403	0	0	0	0	0.966	0	0	0.649	0.987
TOP2B	SUMO1	9606.ENSP00000396704	9606.ENSP00000376077	0	0	0	0	0.068	0.366	0.8	0.346	0.912
TOP2B	TOP2A	9606.ENSP00000396704	9606.ENSP00000411532	0	0	0	0.972	0.062	0.489	0.8	0.805	0.898
TPR	THOC2	9606.ENSP00000356448	9606.ENSP00000245838	0	0	0	0	0.546	0	0	0.486	0.756
TPR	NUP35	9606.ENSP00000356448	9606.ENSP00000295119	0	0	0	0	0.127	0	0.8	0.505	0.906
TPR	PHAX	9606.ENSP00000356448	9606.ENSP00000297540	0	0	0	0	0.086	0	0.9	0	0.904
TPR	FIP1L1	9606.ENSP00000356448	9606.ENSP00000336752	0	0	0	0	0.219	0.152	0.9	0	0.927
TPR	AHCTF1	9606.ENSP00000356448	9606.ENSP00000355465	0	0	0	0	0.586	0	0	0.719	0.879
TPR	SUMO1	9606.ENSP00000356448	9606.ENSP00000376077	0	0	0	0	0.183	0.077	0.6	0.264	0.748
TPR	ATRX	9606.ENSP00000356448	9606.ENSP00000362441	0	0	0	0	0.819	0.057	0	0	0.822
TPR	SLBP	9606.ENSP00000356448	9606.ENSP00000417686	0	0	0	0	0.065	0	0.9	0.063	0.904
TPR	INCENP	9606.ENSP00000356448	9606.ENSP00000378295	0	0	0	0	0.082	0	0.9	0.123	0.912
TPR	TOP2A	9606.ENSP00000356448	9606.ENSP00000411532	0	0	0	0	0.221	0.146	0.9	0.045	0.928
TPX2	RAD51AP1	9606.ENSP00000300403	9606.ENSP00000228843	0	0	0	0	0.802	0	0	0.218	0.838
TPX2	MCM2	9606.ENSP00000300403	9606.ENSP00000265056	0	0	0	0	0.791	0	0	0.325	0.853
TPX2	ANLN	9606.ENSP00000300403	9606.ENSP00000265748	0	0	0	0	0.839	0	0	0.482	0.913
TPX2	MCM10	9606.ENSP00000300403	9606.ENSP00000418268	0	0	0	0	0.785	0	0	0.218	0.825
TPX2	SKA3	9606.ENSP00000300403	9606.ENSP00000319417	0	0	0	0	0.832	0	0	0.18	0.857
TPX2	BRCA1	9606.ENSP00000300403	9606.ENSP00000418960	0	0	0	0	0.411	0.682	0	0.514	0.901
TPX2	INCENP	9606.ENSP00000300403	9606.ENSP00000378295	0	0	0	0	0.689	0	0	0.699	0.902
TPX2	CDCA3	9606.ENSP00000300403	9606.ENSP00000442068	0	0	0	0	0.871	0	0	0.345	0.912
TPX2	MKI67	9606.ENSP00000300403	9606.ENSP00000357643	0	0	0	0	0.847	0.27	0	0.4	0.927
TPX2	RRM2	9606.ENSP00000300403	9606.ENSP00000353770	0	0	0	0	0.923	0	0	0.414	0.953
TPX2	NUSAP1	9606.ENSP00000300403	9606.ENSP00000453403	0	0	0	0	0.913	0	0	0.661	0.969
TPX2	TOP2A	9606.ENSP00000300403	9606.ENSP00000411532	0	0	0	0	0.993	0	0	0.604	0.997
YAF2	RYBP	9606.ENSP00000328004	9606.ENSP00000419494	0	0	0	0.932	0	0.632	0.3	0.943	0.748
YAF2	BCOR	9606.ENSP00000328004	9606.ENSP00000367705	0	0	0	0	0	0.898	0	0.682	0.966
YBX1	SRSF9	9606.ENSP00000361626	9606.ENSP00000229390	0.051	0	0	0	0.102	0.473	0	0.555	0.774
YBX1	HNRNPD	9606.ENSP00000361626	9606.ENSP00000313199	0	0	0	0	0.104	0.538	0	0.806	0.913
YBX1	LARP1	9606.ENSP00000361626	9606.ENSP00000336721	0	0	0	0	0.163	0.504	0	0.49	0.77
YBX1	SLBP	9606.ENSP00000361626	9606.ENSP00000417686	0	0	0	0	0.062	0	0.72	0.1	0.742
YBX1	NACA	9606.ENSP00000361626	9606.ENSP00000448035	0	0	0	0	0.349	0.79	0	0.052	0.859
YBX1	SRSF2	9606.ENSP00000361626	9606.ENSP00000376276	0	0	0	0	0.108	0	0.8	0.358	0.875
ZC3H11A	THOC2	9606.ENSP00000438527	9606.ENSP00000245838	0	0	0	0	0.187	0.387	0.6	0.293	0.84
ZC3H11A	CASC3	9606.ENSP00000438527	9606.ENSP00000264645	0	0	0	0	0	0	0.6	0.452	0.771
ZC3H11A	C17orf85	9606.ENSP00000438527	9606.ENSP00000373657	0	0	0	0	0.109	0.679	0	0	0.701
ZC3H11A	SRSF2	9606.ENSP00000438527	9606.ENSP00000376276	0	0	0	0	0.153	0	0.6	0.201	0.705
ZC3H18	ACIN1	9606.ENSP00000416951	9606.ENSP00000262710	0	0	0	0	0.129	0.735	0	0	0.759
ZC3H18	SRRM2	9606.ENSP00000416951	9606.ENSP00000301740	0	0	0	0	0.118	0.823	0	0	0.837
ZC3H18	SRRT	9606.ENSP00000416951	9606.ENSP00000480421	0	0	0	0	0.194	0.678	0	0.336	0.812
ZC3H4	FIP1L1	9606.ENSP00000253048	9606.ENSP00000336752	0	0	0	0	0.075	0.608	0	0.377	0.754
ZEB1	ZEB2	9606.ENSP00000354487	9606.ENSP00000454157	0	0	0	0.904	0.084	0	0.8	0.914	0.825
ZEB1	SUMO1	9606.ENSP00000354487	9606.ENSP00000376077	0	0	0	0	0	0.105	0.9	0.119	0.914
ZEB1	FOXO3	9606.ENSP00000354487	9606.ENSP00000385824	0	0	0	0	0	0	0.9	0.342	0.931
ZEB2	ZEB1	9606.ENSP00000454157	9606.ENSP00000354487	0	0	0	0.904	0.084	0	0.8	0.914	0.825
