# Supplementary material for: Regulation of CHK1 inhibitor resistance by a c-Rel and USP1 dependent pathway
Source: Biochem J. 2022 Oct 14;479(19):2063–86. doi: 10.1042/BCJ20220102 (PMC9704646; doi:10.1042/BCJ20220102)
Supplement: Supplementary Material 4 [file BCJ-479-2063-s4.pdf]

## Sheet: Description
Supp Data File 2 Venn diagrams.xlsx
Data files from Venn analysis of Em-Myc lymphoma cell proteomics and RNA Seq data using http://bioinformatics.psb.ugent.be/webtools/Venn/
Tab1: Comparison between phosphosites downregulated in untreated c-Rel null relative to untreated wild type with those down regulated in WT cells treated with CHK1i (CCT244747) versus untreated WT.
Tab 2: Comparison between total proteins downregulated in untreated c-Rel null relative to untreated wild type with those down regulated in WT cells treated with CHK1i (CCT244747) versus untreated WT.
Tab3: Comparison between all phosphosite changed in untreated c-Rel null relative to untreated wild type with those down regulated in WT cells treated with CHK1i (CCT244747) versus untreated WT.
Tab 4: Comparison between all total changesin untreated c-Rel null relative to untreated wild type with those down regulated in WT cells treated with CHK1i (CCT244747) versus untreated WT.
Tab 5: Comparison between protein encoding mRNA transcripts and proteins down regulated in untreated c-Rel null Eμ-Myc lymphomas relative to untreated wild type Eμ-Myc lymphomas
Tab6: Comparison between phosphosites upregulated in untreated c-Rel null relative to untreated wild type with those down regulated in WT cells treated with CHK1i (CCT244747) versus untreated WT.
Tab 7: Comparison between total proteins upregulated in untreated c-Rel null relative to untreated wild type with those down regulated in WT cells treated with CHK1i (CCT244747) versus untreated WT.

## Sheet: Phosphosite REL vs WT CHK1i
Names	total	elements
CREL/WT no inhibitor WT CHK1i	360	Ppp1r35_S44;S46
		Ahsg_S309;S314
		Smc3_S1067
		Q8BH50_S66
		Gpalpp1_S104;S121
		Hmga1_[S102/S103]
		Clspn_S932
		Dmtn_T10
		Map1b_S1260
		Gypa_S166
		Lin52_[T51/S52/S53]
		Slc9a1_S697
		Rrm2_S20
		Flna_S2152
		Gch1_S24
		Smarcc1_S327;S329
		Rabep1_S407;S410
		Hnrnpk_T118
		Flna_S2180
		Nucb1_S456
		Tpx2_S737
		Mki67_S2333
		Ubap2l_S629
		Sfswap_S903
		Zcchc8_T474
		Mki67_[S1186/S1187]
		Tagln2_S163
		Dmtn_S96;[S90/T91/S92]
		Hexim2_S75
		Hsp90aa1_S231
		Dffa_S314
		Dek_S306;S308;S311;S312
		Slc9a1_S801
		Mki67_S1825
		Kctd12_S178
		Cbx5_S93
		Sdhaf4_S56
		Cfdp1_T129
		Cbx3_[S95/S97/S99];S95
		Mki67_S2934
		Prrc2b_S387
		Dok3_S274
		Prkar2b_S112
		Sox6_S454
		Sox6_S399
		Eif4ebp1_T69
		Nsfl1c_S176
		Hemgn_S103;S124
		Raver1_S576
		Nfkb1_S940
		Pdlim5_S228
		Trim28_T599;S598;S600
		Cbx3_S95;S97;S99
		Hemgn_S223
		Hcfc1_S2030
		Cfl1_S3
		Fgfr1op_S160
		Atxn2_S741
		Clspn_[T1123/S1133]
		Otud5_[T502/S503]
		Fyb1_S561
		Tmem184b_S403
		Hnrnph1_S104
		Sept2_S218
		Cwc25_S307;S309
		Prrc2b_S226
		Ikzf1_S440
		Psma3_S250
		Klf3_S71;S78
		Thumpd1_S86;S88
		Ddx21_S218
		Safb_S626
		Yap1_S149
		Slbp_S182
		Dnttip2_S353
		Psme3_[T23/S24]
		Sh3kbp1_[S156/S159]
		Anln_S318
		Arpp19_[T22/S23]
		Ska3_S119
		Ubap2l_S628
		Lig1_S51
		Ranbp3_S283
		Spen_S758;S762
		Nusap1_S69
		Rad51ap1_S254
		Akt1s1_T247
		Gab1_S455
		Treml1_[S228/S229]
		Fam122a_S144
		Ahsg_S138
		Hsp90ab1_S255
		Mindy1_S440
		Mbd1_S556
		Mki67_S1000
		Prrc2a_S1667
		Sh3kbp1_[S630/S631/S633]
		Plekho2_S395
		Rplp2_S105
		Hsp90ab1_S226
		Cdca3_S207
		Dbnl_T299
		Eif4enif1_S77
		Dnttip2_[S352/S353]
		Hnrnpab_S260
		Stk4_S418
		Prpf4b_Y849
		Ahsp_S102
		Srrm2_[S1556/S1557]
		Myo18a_S2039
		Hemgn_S213
		Erbin_S1013
		Ag2_S210
		Bod1l_S2841
		Bod1l_S2968
		Cast_T479
		Mcm10_T85
		Tcf3_[S377/Y380]
		Nucks1_S58
		Cic_S1809
		Ahsg_S312
		Taf7_S256
		Naca_S2138
		Srrm1_S655;S657
		Ptprc_S964
		Clspn_S417
		Prrc2a_[S1104/T1106/S1108];S1104
		Stmn1_S16
		Stmn1_S38
		Ddx21_S243
		Limch1_S377
		Btf3_S156
		Filip1l_S789
		Hemgn_S135
		Otud5_S64
		Specc1_[T135/S136/S137]
		Kiaa1211_S783
		Eef1d_S162
		Prpf40a_S879;S881;S884
		Akap2_[S799/T801]
		Akap13_S1892
		Akap12_S1292
		Ostf1_S214
		Hemgn_S241
		Pdlim2_S120;S143;T138
		Ybx3_S52
		Htatsf1_S441
		Ank1_S1675
		Macf1_S4483
		Hdgf_S132;S133
		Dmtn_[S26/S28]
		Ppig_S714
		Stk10_S437
		Specc1_S324
		Otud5_S165;S177
		Tmsb4x_T29
		Mki67_S2649
		Dock8_[S903/S904/S905]
		Mki67_S1187
		Arglu1_S92
		Smarcc2_S304;S306
		Tcof1_S169;T171
		Fam129a_S601
		Hexim2_S177;[S166/S168]
		Il16_S967
		Tbc1d5_S565
		Atf1_S196
		Specc1_[S355/T357]
		Mki67_S2255
		Dmtn_S333
		Npm1_S241
		Pdlim2_S199;[S204/S205]
		Etv6_S215
		Cbx3_S93;S95
		Eif4g2_T507
		Alkbh5_[S384/S385]
		Rad23a_S205
		Klf3_S91;[S99/S100]
		Tnrc6b_[S598/S599]
		Ap3d1_S784
		Brca1_S686
		Mki67_S2392
		Anln_S180
		Sox6_S439;S442
		Clspn_[S42/S46]
		Macf1_[S3082/S3085]
		Tmcc2_S461
		Tcf12_S67
		Stmn1_S16;S25
		Tfeb_[T330/S331]
		Hemgn_S124
		Epsti1_S39
		Eif4b_S422;T427
		Pds5b_S1356
		Chd4_S1528
		Mki67_T1175
		Bod1l_S3000
		Xrn2_S499;S501
		Add2_S692;S696;S700
		Usp7_S19
		Gab1_S420
		Zyx_S336
		Tcof1_S1191
		Mki67_S2545
		Zc3h14_S515
		Fmnl1_S184
		Tns3_S769
		Hdgfl2_S640
		Hemgn_S171
		Limch1_S973
		Hemgn_S269
		Wrnip1_S65
		Tmcc2_S435
		Dmtn_[S288/S289]
		Anln_[S292/S293]
		Dkc1_S455
		Fli1_[T35/S39]
		Agfg1_T177;[S179/S181]
		Lcp1_S257
		Eif4g3_[S267/T269]
		Mink1_S729
		Zcchc8_S429
		Hist1h1e_S102
		Rplp0_S307
		Ppp1r12a_S870
		Nav1_S651
		Thrap3_S315;S320
		Cenpc_S145
		Tnks1bp1_[S911/S912]
		Dmtn_S226
		Cobll1_T899
		Dmtn_S156
		Dmtn_S372
		Rgs3_S686
		Ybx1_S163
		Mki67_S1342
		Tal1_S122
		Tcof1_S456
		Hemgn_T286
		Borcs7_[S44/S45]
		Mki67_T2073;[S2076/T2077]
		Fam129a_S595
		Trim28_[S823/S824]
		Otud5_[S445/S447]
		Tns3_S752
		Nup35_S73
		Sash3_S38;S42
		Plekho2_S236
		Prrc2b_S621
		Jpt2_S69
		Stab2_S2503
		Evi2b_[S295/S296]
		Hnrnpu_S247
		Cbx3_S95
		Pea15_S116
		Rabep2_S180
		Hsp90aa1_S263
		Q8BH50_S143;S145
		Myh9_[T1939/S1943]
		Atf7ip_S533
		Map4k4_S701
		Stmn1_S46
		Clspn_S823
		Caap1_[T69/S71/S72/S73/S74]
		Mki67_T1952;S1955
		Hist1h1b_S18
		Rad23a_S125
		Ahsg_S309;S312;S314
		Nufip2_S213
		Hist1h3a_S29
		Mki67_S767
		Fyb1_S546
		Gab1_[S264/Y265/S266]
		Klf3_S91;[S98/S99/S100]
		Hist1h1b_[S2/T4]
		Klf3_S249
		Thrap3_S207
		Mki67_T2162
		Lsp1_S273
		Mki67_[S2390/S2392]
		Mphosph10_S164;S168
		Eif4ebp1_T69;S100
		Sgta_T82
		Hmga1_S9
		Mki67_T1363;S1366
		Dmtn_S152;S156
		Mphosph10_S164;S168;S172
		Hmgn1_S7
		Rad51ap1_S276
		Dmtn_S26;S22
		Tnks1bp1_S429
		Dido1_T148;S149;S151
		Ubap2l_S625;S628
		Mki67_[S1772/S1773]
		Ensa_S109
		Lig1_[S188/S191]
		Cast_S219
		Dock2_S1729
		Eef1d_T147;S162
		Tcea1_S100
		Bmp2k_S685
		Cast_S466
		Carhsp1_S42
		Epb41l3_S804
		Clspn_S740
		Dbnl_[S277/T278/T279]
		Impa1_[S37/S38]
		Eif3b_S75
		Sox6_S466
		P58686_S82
		Tmpo_S157
		Hnrnpul1_[Y720/S721]
		Klf3_S91;S100
		Zc3h18_S71;T62
		Hexim2_S168
		Tnip1_S448
		Mtss1l_S575
		Cbx1_S89
		Scnm1_S182
		Cpeb4_[S97/S99]
		Hemgn_S171;S158;T155
		Zc3h11a_S743;S740
		Klf3_S91;S99
		Stmn1_S63
		Vasp_S317
		Fn1_S2475
		Thrap3_S935
		Crtc2_S612
		Ybx3_S2
		Kiaa1551_[S1480/S1482]
		Sash3_S7
		Sh3kbp1_S227
		Hmga1_S2;S4
		Dmtn_S87
		Srrm2_S2052;S2054
		Specc1_S314
		Mki67_T1243;[S1246/T1247]
		Pcnt_S1437
		Pias1_S503
		Rad51ap1_S19;S23
		Mcm2_S21;S27
		Cbx3_S93;S95;S97
		Nmt1_S47
		Mki67_[S2052/T2054]
		Hdgfl2_S366;S367
		Cep85_S16
		Hemgn_S435
		Nucks1_S181
		Macf1_S3889
		Hemgn_S380
		Cd2ap_S458
		Top2a_S1388
		Eif3b_S120;S123
		Pex19_S35
		Srrm2_S2404
		Top2a_S1328;S1333;T1350
		Hnrnpa3_S359
		Pogz_S422
		Mki67_T3021
		Sh3kbp1_S274
WT CHK1i	218	Lmna_S392
		Usp10_[T205/S208]
		Gapvd1_T762
		Chchd2_S45
		Slc9a3r1_S297
		Prrc2c_S1933
		Sash1_S83
		Clip1_S194
		Caprin1_[S21/S23]
		Add1_S586
		Srrm2_S349
		Srrm2_S814
		Nucks1_S144;S130
		Bap18_T160
		Mki67_S2017
		Brca1_S706
		Osbpl11_S15
		Nedd1_S379
		Brca1_S1152;S1154;S1150
		Sgta_T305
		Srrm2_S1339;S1343
		Anln_S259
		Srrm1_[S1138/S1140]
		Smap2_S239
		Zc3h18_S847
		Rragc_S381
		Prrc2c_[S1221/S1222]
		Srrm2_S1216;S1209
		Talpid3_[S1223/S1224/T1225]
		Top2a_S1469;S1470
		Iws1_S261
		Srrm2_S323
		Efhd2_[S74/S76]
		Map4_S1046
		Eloa_S195
		Tp53bp1_S1096
		Eif3c_S39
		Lig1_T77
		Atxn2_S753
		Ythdf2_S2
		Hbb-b1_S45
		Zc3h13_S1086;S1090;S1093
		Bmp2k_S929
		Lsp1_S63
		Lima1_S488
		Hba_S9
		Nucks1_S144
		Lmnb1_[T21/S24]
		Q8BH50_S67
		Cenpu_S186
		Srrm1_S626;[Y623/S624]
		Prrc2c_[S1933/S1935]
		Zc3h18_S92;S106
		Jund_S100
		Fcho2_S403
		Esf1_S651
		Acin1_S387;S389;S391
		Epn1_T420
		Eif3g_T41;S42
		Atox1_S44
		Hirip3_S238
		Srrm2_S435;[S433/S434]
		Mphosph10_S346
		Jmjd1c_S138;S135
		Tax1bp1_S693
		Pds5b_S1166
		Srrm2_[S1229/S1230]
		Gatad2a_S96
		Vim_S459
		Clip1_S146
		Crtc2_S612;S623
		Ccdc94_S309;[S312/S314]
		Mdc1_S442;T444
		Pml_S404
		Mylk_S1798;S1795
		Tcof1_S499
		Rcsd1_[S82/S83]
		Psip1_S272
		Pnisr_S290
		Bud13_S263
		Rcsd1_S120;S127;S123
		Srsf6_S316
		Rif1_[S1867/S1868]
		Matr3_S195
		Pja2_S320
		Luzp1_S660
		Zc3h18_S64
		Set_S183
		Npm3_S147;S151;S155
		Srrm2_S454
		Anln_S513
		Mki67_T1952
		Ranbp2_S2505
		Wipi2_[S394/T397]
		Pym1_S138
		Nolc1_[S370/S371/S372]
		Stip1_S481
		Mki67_S337
		Tab3_[S102/S103]
		Tcof1_S88
		Srsf4_S401
		Acin1_S380
		Hbb-b1_[T85/S88]
		Dmtn_S152
		Sorbs2_S358
		Npm1_S4
		Srrm1_T633;S635
		Dek_S33
		Hnrnpu_S58
		Bud13_S297
		Ubxn1_S187;S200
		Chaf1a_[S294/S296]
		Cast_S730
		Iws1_S384
		Nsrp1_S31;S33
		Ranbp3_S40
		Pom121_S355
		Zgrf1_S462
		Pnisr_S211
		Cep170_S829
		Top2b_S1509;S1511
		Sox6_T410
		Rfc1_S244
		Thrap3_S679
		Cc2d1a_S435
		Rplp1_S104
		Lnpk_S411
		Klc4_S590
		Uimc1_S689
		Reps1_S708
		Eif4ebp2_T41;T46
		Ubap2l_S879
		Mfap1b_S118
		Zc3h4_S92
		Zc3h18_S888
		Clspn_S20;S42;S46
		Srrm2_S1380
		Zc3h13_S1090;S1093
		Eif3g_S42
		Srsf2_S191
		Clip1_[T144/S146]
		Top2a_S1472
		Cast_S518
		Hmga1_T53
		Efhd2_S74
		Slc7a6os_S156
		Mki67_[T3059/S3061]
		Nolc1_S238
		Srrm2_S2224
		Iws1_S185
		Unc119_S41;S39
		Zc3h18_[S530/S532]
		Rcsd1_T256
		Mybbp1a_S1253
		Atad5_S452
		Scaf1_S240
		Hirip3_S153
		Srrm2_[S1193/S1194]
		Hmga1_S99;S102;S103
		Hist1h1d_T18
		Mfap1b_S116;S118
		Cdca3_S197;S207
		Mki67_[S2133/S2134]
		Fip1l1_S86
		Mki67_S2780
		Arhgap30_[T670/S671]
		Hirip3_S231;S234;S238
		Igf2r_S2401
		Mki67_S1587
		Srrm1_S743;T745
		Pdap1_S60
		Top2b_S1537
		Fam122b_S119
		Med1_S1225
		Zbp1_S384
		Ddx21_S118
		Phf2_S534
		Slco2b1_S21
		Polr2a_T1915;
		Srrm2_[S1475/S1477]
		Bcl9l_T986;S988
		Hirip3_S389
		Igf2r_S2476
		Tfeb_S108;S113
		Trappc12_S234
		Srrm2_T823
		Bag6_S1139
		Synpo_S833
		Synpo_S134
		Ensa_S2
		Gpalpp1_S104
		Rcsd1_S120;S127
		Rtn4_S651
		Slbp_S7
		Ppp1r18_S234
		Mki67_S1352
		Srrm2_S1339
		Srrm2_[S1535/S1537/S1538];S1535
		Hmga1_T53;S36
		Bod1l_S240
		Sp1_S7
		Pds5b_S1281
		Csrp1_S192
		Rcsd1_S105;S108
		Eloa_S82
		Nucks1_S58;S61
		Ncl_S145
		Zc3h13_S1093
		Rab11fip5_S474
		Tmf1_[S397/T399]
		Vim_S325
		Apbb1ip_T534
		Pdlim4_[S118/S119]
		Fam122a_S140;S144
		Zc3h13_S921
		Nav1_S510
		Arhgap30_[S875/T876]
		Ap3d1_S760
CREL/WT no inhibitor	641	Bcl11a_S447
		Fnbp4_S507
		Dpf2_T176
		Wdr44_[S3/S5]
		Lbr_S101
		Ddx21_S243;S245
		Acin1_S497
		Nelfe_S51
		Cavin2_S359;S363
		Slc16a1_S491
		Eif4ebp1_S64;T69
		Zc3h13_S380
		Fam76b_S193
		Tle3_[T285/S286]
		Ccnk_S325;S329
		Bin1_S298
		Synpo2_S300
		Hdgfl3_S121;S122
		Tnks1bp1_S796
		Ank1_S1759
		Ccdc12_S165
		Nsun2_S723
		Arap1_S232
		Bmp2k_S908
		Add3_S681
		Macf1_S3082;S3085
		Sumo1_S2
		Prrc2a_T1110;T1106
		Sp3_S72
		Ncbp3_S495
		Bola1_S123
		Pag1_S247
		Fip1l1_S235
		Mecp2_S80
		Nolc1_T410
		Larp4b_S601;S603
		Nfatc2_S860
		Pgrmc1_S181
		Cdk11b_S115
		Nes_S688
		Add1_T610
		Fam122a_S73
		Tcof1_S1127
		Eif2b5_S540
		Ythdc1_S146;T148
		Myc_T58;[S62/S64]
		Irf2bpl_S638
		Ing4_S150
		Myc_[S62/S64]
		Cdca2_S758
		Casc3_S65
		Srek1ip1_S143
		Clspn_S785;S787
		Sh3kbp1_S553;S555
		Map1b_S1815
		Serbp1_[S327/S329]
		Trim28_S601;[T599/S600]
		Bnip2_S114
		Bod1l_S2777
		Usp8_S680
		Slc9a1_S790
		Nucks1_T202;S204
		Lrrfip1_S501
		Acin1_[S838/T840]
		Slc9a3r1_S297;[S283/S285/S286]
		Canx_[T561/S563]
		Rad51ap1_[S156/S158]
		Wac_S62;S64
		Dcaf5_S799
		Ptges3_S113
		Taf12_S51
		Pa2g4_S2
		Nucks1_S30;S19
		Limd1_S413
		Ppp1r35_S53
		Akap12_[S235/T236]
		Ppp1r11_S82;T80
		Snip1_[S89/S91]
		Ms4a1_S29
		Stub1_S20
		Fip1l1_S479;S487
		Arid3a_S127
		Myb_T530
		Slc9a3r1_S275
		Tnfrsf13c_T163
		Mdc1_S929
		Tpr_S1259
		Fkbp15_S1159
		Ccdc86_S283
		Znf639_S60
		Srrm1_S260
		Pja2_S306
		Myo9b_S1175
		Synpo2_[T219/S220]
		Q8BH50_S145
		Hdac2_S422;S424
		Larp4b_S721
		Srrt_S74
		Srrm2_S1360;[T1370/S1372]
		Lrrfip1_S84
		Sptbn1_S2102
		Rplp1_S101;S104
		Tcof1_S794
		Foxo1_S467
		Prrc2a_S378
		Uba1_S4
		Ubxn1_[S200/S202]
		Nufip2_S376
		Hirip3_S331;S332;S328
		Bcl7b_S122
		Add2_S614;[T622/S623/T626]
		Yap1_[S46/T48]
		Dnmt1_S125
		Anp32a_T15
		Bin2_S392
		Atrx_S590
		Synj1_S1350
		Myh11_S1954
		Fam103a1_S36
		Tcof1_S593
		Bmp2k_S1010;S1012;S1013
		Hnrnpul2_S191
		Patl1_T178
		Akap12_T583
		Serbp1_S234
		Sh3kbp1_S555
		Pdap1_S63
		Larp1_S81
		Rad51ap1_S23
		Eif4ebp1_T45
		Sipa1l3_S1538
		Srsf2_T25
		Pml_[T513/S514/S515]
		Lsp1_S243
		Nes_S1837
		Myh9_T1939;S1943
		Snrk_S569
		Atxn2_S859
		Pphln1_S154
		Srsf9_S205
		Prrc2a_[T377/S378]
		Ripor2_S582
		Bckdk_S31
		Nolc1_T594;T600
		Psip1_T122
		Numa1_S398
		Wac_S53
		Tnik_S737
		Sash3_S320;T318
		E4f1_S166
		Srrm1_S723;S725;S731
		Med26_S361
		Srrm2_S1343;[S1338/S1339/S1340];S1338
		Eaf1_S165;[T157/S158]
		Plekha6_S901
		Prrc2c_S189;S192
		Tcof1_S843
		Ly9_T647
		Elf1_S334
		Dbn1_[S141/S142]
		Sptan1_S1029
		Srsf2_S206;S208;S212;[S220/S221]
		Nop53_S305
		Zfand2b_S163
		Slc9a3r1_[S263/S264]
		Hemgn_T315
		Ptprc_S1229
		Polr3g_S158
		Hnrnpd_[S82/S83]
		Retreg2_T274;S276;S278
		Mdc1_S732
		Eif4ebp1_T36;T45
		Arhgef6_S679
		Nucks1_S19
		Mdc1_S168
		Arid3a_[S77/S78]
		Rif1_S1683
		Filip1l_S1047
		Pxn_S83
		Bag3_S390
		Lamtor1_T28
		Zranb2_S120
		Larp4b_T735;S739
		Tcf20_S612;S603
		Bcl10_S141
		Pml_[T527/S528]
		Washc2_S747
		Nolc1_S585
		Eif5_S387;S388
		Mki67_S2425
		Tmpo_S66;S67
		Eef1b_Y79
		Rad9a_S385
		Rabep1_S407
		Atn1_S630
		Nol7_S129
		Nucks1_S54;S58
		Lrrfip1_S547
		Sash3_S42;S38
		Map4k1_S370;[S375/Y379]
		Nucks1_S73;S75;S79
		Pdcd4_S94
		Sash1_S163
		Eef1b_S106
		Rybp_S99
		Itsn1_S897
		Aak1_S729
		Lbh_S63
		Cic_S2284
		Hirip3_S80
		Gpbp1_S381
		Specc1_S359;T357
		Myc_S164
		Atn1_T615
		Irf2bp2_S250
		Rreb1_[T1598/S1600]
		Atp2b1_S1155
		Hdgf_S128;S132;S133
		Htatsf1_S724
		Znf148_S306
		Rps3_T221
		Rrbp1_S788
		Akap13_S1253
		Tcof1_S1303
		Dkc1_S451;S453
		Rere_S656
		Nasp_S712
		Retreg3_S320;S313
		Myh9_S1943
		Ticrr_S1180;S1187
		Nop14_S96
		Lrrfip1_S658
		Rad51ap1_S309
		Nolc1_S312
		Tcof1_S1216
		Washc2_S723
		Pml_S528
		Cdk13_[S1146/T1147]
		Srsf5_S226;S228;S230
		Acin1_S838
		Bcor_S423
		Washc2_S614
		Lrrfip1_S649
		Lsp1_T166;S168;S180;S184
		Denr_T69
		Otud4_S1016;S1017
		Sart1_S480;S492
		Cbx3_S93
		Ftsj3_S576
		Ablim1_S475
		Atf7ip_S593
		Prrc2c_T358
		Mdc1_S461
		Cep350_S1641
		Ybx1_[T23/S27/T28]
		Spag7_S219
		Eif3j1_S14
		Btf3_[S156/T158]
		Sf1_S80;S82
		Kri1_S142
		Gtf2i_S674
		Add2_S602
		Dpf2_S142
		Abi1_S183
		Prrc2c_S189
		Slc14a1_S4
		Aldoc_S4
		Rbl1_S1036
		Ptma_S10;T13
		Incenp_T452;S454
		Cstf2_S527
		Ybx3_S33;S52
		Rabep2_S176;T181
		Hist1h1c_S2
		Hdgf_S132
		Ccdc86_S194
		Bclaf1_S177
		Nsfl1c_S114
		Stk4_S320
		Thoc2_S1516
		Apc_S2674
		Edc3_S131
		Srrm2_S1376;S1377;S1378;S1380
		Zc3h13_T263;S265
		Tcof1_T171
		Hdgf_S128
		Hdac1_S421;S423
		Pdlim2_S210
		Zranb2_S188
		Add2_S618;[T612/S614]
		Ubap2l_S436
		Szrd1_S37;S39
		Srrm2_S796;S797
		Lsp1_T166;S168
		Tcof1_S1242
		Wrnip1_S153
		Top2b_S1453;[S1444/S1448]
		Prrc2c_S2646
		Bin2_S463
		Tsc22d4_S298
		Rbm25_S672
		Arhgap1_S51
		Hspb1_S86
		Hirip3_S396
		Raver1_S626
		Sp110_S175
		Irf2bpl_S526
		Lcp1_S5
		Bin2_[S391/S392]
		Rplp2_S79
		Tcof1_T803
		Zranb2_S153
		Eml4_S146
		Tubb1_S435
		Trim28_S51
		Bcl11a_S625;S630
		Jmjd1c_S459
		Dennd1b_S632
		Nolc1_S646
		Tcof1_S852
		Dock2_S1683
		Bap18_S96
		Ybx1_S172
		Apobr_S520
		Msh6_S63
		Tcof1_S1113
		Eaf1_[T157/S158]
		Ppp1r12a_Y446
		Nmt2_S38
		Tp53bp1_S268
		Acaca_S29
		Ranbp2_S2729
		Scaf8_S617
		Znf703_S257
		Cast_S15
		Canx_S553;[T561/S563]
		Ybx1_S163;S174
		Q99M08_S19
		Akap12_S350
		Rplp2_S102;S105
		Phax_T80
		Thumpd1_S8
		Dkc1_S455;[S451/S453]
		Vcl_S290
		Nucks1_S113
		Kiaa1551_S1142
		Rbm3_S143
		Washc2_S388
		Nucks1_T202;S204;S214
		Rabep1_S410;[S407/T408]
		Syap1_T262
		Ppp6r2_T672
		Cntrob_S63
		Slu7_S215
		Tlk1_[S133/S134]
		Phactr4_S118
		Bod1l_S2001
		Eif4b_S498
		Hist1h1a_S2
		Eif4b_S422
		Ablim1_S396
		Set_S30
		Irf3_S135
		Mapk14_Y182
		Irs2_S1165
		Itga4_S1028
		Nolc1_T594
		Zfand2b_S173
		Bag3_S404
		Atxn2_S727
		Aplf_S238
		Rplp2_S17
		Anp32b_T265
		Pold3_S306
		Abcf1_S22
		Nelfe_S115
		Pacsin1_S346;[S345/Y347]
		Txlna_S523
		Ranbp3_S40;S32;S33
		Hmga1_S102;S103
		Erbin_S599;S600
		Eef1d_S133
		Bdp1_S1870
		Ep300_S1037
		Eif4ebp1_[S99/S100]
		Znf185_[S18/S20]
		Knop1_[T56/S57/S59]
		Thrap3_[S913/T914/S915]
		Lrrfip1_S605
		Snx17_S409
		Med19_S226
		Champ1_S603
		Foxo1_S284
		Phax_S14;S16
		Slc16a1_S213
		Eaf1_S165;S158
		Map1b_S1438
		Rrp15_S11
		Top2b_S1453
		Rere_S613
		Nucks1_S214
		Rnf213_S252
		Pag1_[S348/S351]
		Pi4k2a_S47
		Srrm2_S1465;T1467
		Yaf2_[S151/S153/S154]
		Hnrnpa1_S6
		Nes_S1860;S1861
		Ikzf3_S42
		Ncoa3_S847
		Erbin_S869
		Sash3_T61
		Tceal3_S120
		Bach2_S314
		Apc_[S1435/T1437]
		Bag3_S179
		Hdgf_[S132/S133]
		Kiaa1211_T852
		Rtn4_S16
		Clint1_S324
		Caap1_S183
		Lrrfip1_T525
		Ppp1r12a_[S445/Y446]
		Brd8_T264;S268
		Nipbl_S280
		Add2_S602;S608
		Hist1h1d_[S2/T4]
		Marcks_T143
		Canx_S582
		Znf703_S231
		Hemgn_S171;S158
		Tcof1_T860;S853
		Eif4b_S93
		Rbm33_S816
		Znf609_S575;S577
		Ablim1_S496
		Caap1_[S306/S307]
		Mrps36_S60
		Arhgef6_S639
		Prrc2a_S342;S350
		Slbp_S110
		Znf185_[T64/S65]
		Caap1_S307
		Fnbp1_S299
		Srsf1_S234;S242;S238
		Pphln1_S219
		Ccdc86_S18
		Gpatch4_S130
		Srrm1_S723;S725;S731;S733
		Specc1_[S355/T357/S359]
		Snrpc_S17
		Cdv3_T205
		Safb_S366
		Jmjd1c_S436
		Tcf20_S612
		Srrm2_S2646
		Npm1_S10
		Ppig_S742;S743;T746
		Inpp5f_S908
		Rplp2_S102
		Erbin_S849
		Zc3h4_S1270;S1276
		Prkab1_S108
		Abi1_S225
		Nucks1_T179
		Caprin1_S8
		Sash3_S42
		Fam122a_S264;S267
		Spn_S347
		Map2_T1609
		Prrc2c_T1238;T1240
		Bod1l_S2920
		Pwp1_S49
		Iws1_S345
		Sorbs2_[S381/S382]
		Hexim2_[S52/T57]
		Apobr_S484
		Szrd1_[S105/S107]
		Tbc1d5_S578
		Eif4ebp1_T69;S93
		Evl_[S243/S244]
		Wac_S64
		Ahctf1_S1792
		Dennd1c_T696
		Znhit3_S76
		Cmtr1_S27
		Ppig_S685
		Irf2bp1_S384
		Kpna3_S60
		Reps1_S561
		Znf609_S575
		Cxcr4_S326
		Bclaf1_S289;Y283
		Zfp91_S106;[S85/S86]
		Ankrd17_S2055
		Mki67_S213
		Smap_S17
		Vgll4_S58
		Rcsd1_S378
		Hdgf_S206
		Washc2_S613;S614
		Ppp6r1_S531
		Nrbp1_S2
		Lrrfip1_S302
		Srrm1_S461
		Rplp0_S304;S307
		Jmjd1c_S471
		Wbp11_S353;S361;S364
		Hirip3_S134;T135
		Vcl_S346
		Prrc2c_S899
		Rpl22l1_S118
		Nolc1_T599
		Zc3h4_S917
		Akap12_[T272/S273]
		Arid3a_[S101/S102]
		Srek1ip1_S97
		Api5_S464
		Tcof1_T1132
		Dkc1_S481
		Zeb2_[Y1121/S1122]
		Son_S1723
		Hnrnpk_S284
		Mcm3_S668
		Srrm2_S1179
		Pml_S515;[T513/S514]
		Ranbp3_[S58/T60]
		Samd14_S77
		Rai1_S1116
		Washc2_S1169;S1173;T1174
		Ufl1_S458
		Zc3hc1_S393
		Bach2_S314;T323
		Mcm2_[S40/S41]
		Polr2a_Y1874
		Sptbn1_S2340
		Smndc1_S201
		Jpt1_T54
		Nucks1_T179;S181
		Ccdc86_S225;S252
		Ncoa1_S702
		Rai1_T1058;T1062
		Pdap1_S60;S63
		Mki67_T2106;S2103
		Pdlim2_S204
		Znf592_S39
		Serbp1_S197
		Etv6_S22;T18
		Mcm2_S40
		Fkbp15_S1091
		Rnf168_S262
		Mki67_S2390;S2392
		Bcor_[S1143/T1151]
		Ncoa3_S720
		Ppp1r11_[T80/S82]
		Tmx1_S245
		Ammecr1_S19
		Bin1_S296;S298;S304
		Washc2_S533
		Cfl1_T25
		Ptms_S5
		Evl_S367
		Znf609_S845;S848;S841
		Tmf1_[S137/S138]
		Strip1_S335
		Bcl7a_[S156/S157]
		Polr2a_S1920
		Sp100_[S314/T316]
		Ercc6l_S1021
		Phax_S18;[S14/S16]
		Apc_[S2129/S2130]
		Prrc2c_S904;S901
		Ybx3_S359
		Pml_S536;S528
		Phax_[T344/S347/T349]
		Acin1_T666
		Ppp1r9b_S99
		Srrm2_S1284;[S1276/S1278]
		Rbm26_S127
		Rnf4_S98;S99
		Bcor_S1131
		Ranbp3_S40;S33
		Zc3h4_S92;S94
		Spag7_S158
		Wnk1_S185
		Klf3_S71
		Elf1_S187
		Thrap3_S320
		Apc_S2473
		Trim28_S752
		Sde2_S281
		Epb41l2_S38
		Tpd52l2_S180
		Nolc1_S563
		Hdgfl2_S635
		Pram1_S332
		Q8BH50_T149
		Zeb1_S624
		Srrm2_T973
		Cep170_S1069
		Prkar1a_S83
		Srsf2_S189;S191
		Cdk5rap2_[S479/T481/S485]
		Hexim1_[S98/T99]
		Palld_S901
		Irf2bp1_S436
		Spag9_S364
		Eps15_S816
		Bank1_S11
		Gtf2f1_T389
		Kmt2d_S2597
		Elac2_S815
		Cfdp1_S203
		Crtc2_S457
		Akap12_S505
		Cdk13_T495
		Glcci1_S293
		Arhgap27_S462;[S458/S459]
		Mki67_S1734
		Brca1_S717
		Tpd52_S223
		Mef2c_S222
		Hist1h1e_S2
		Ablim1_S738
		D1Ertd622e_S25
		Gnl3_S95
		Ahctf1_S1541
		Pou2f2_S55
		Sp100_S190
		Znf830_S342
		Irf2bpl_S636;S638
		Spen_S2134
		Atf7_S82
		Map2_S1783
		Hmgn3_S6
		Foxo3_S285
		Add2_S698
		Ybx3_S328
		Jpt1_[S85/S88]
		Pphln1_S147
		Pml_S17

## Sheet: Total REL vs WT and WT CHK1i
Names	total	elements
CREL/WT no inhibitor WT CHK1i	462	Cdca3
		Capzb
		Ssr1
		Dlat
		Ptgr1
		Nup50
		Blvrb
		Elavl1
		Strap
		Lmnb2
		Edf1
		Parp1
		Ybx3
		Actn4
		Sh3kbp1
		Tpx2
		Mcm3
		Rps12
		Dnpep
		Dld
		Casp8
		Eif1
		Etfa
		Ddx39a
		Ist1
		Coro1a
		Rpia
		Pcbp2
		Txndc5
		Ppa1
		Lnpep
		Nme1
		Sod2
		Cct2
		Rpl13a
		Pdhb
		Cox4i1
		Cfl1
		Uqcrc2
		Otud5
		Gata1
		Eef1g
		Ppib
		Zfand2b
		Dynll1
		Mdh2
		Rad23a
		Capza2
		Q80WR5
		Ube2k
		Eftud2
		Pdia3
		Psme1
		Ywhae
		Ppp1r12c
		Fahd1
		Prmt1
		Ska3
		Mapk1ip1l
		Tubb4b
		Lta4h
		Eef2
		Rpsa
		Cox19
		Gmfb
		Eef1d
		Aif1
		Hsp90b1
		Hmgb3
		Nudc
		Cdca5
		Cap1
		Fgg
		Jpt1
		Ndufaf2
		Tmem109
		Hmbs
		Eif2s3x
		Rplp0
		Gpbp1
		Tal1
		Tacc3
		Pebp1
		Eef1a1
		Arl6ip1
		Tuba4a
		Rbbp4
		Psmb1
		Bicd2
		Snu13
		Ran
		Psmc4
		Rpl30
		Eri1
		Calr
		Prpf19
		Gch1
		Eif4b
		Snca
		Aco2
		Taldo1
		Atic
		Hspa4
		Lsm2
		Ccdc32
		Ybx1
		Cd82
		Svbp
		Actc1
		Clspn
		Psmd7
		Vcp
		Mthfd1l
		Idh2
		Actb
		Eno1
		Actr2
		Aldoa
		Q8VCE4
		Psmc6
		Pgls
		Brk1
		Pclaf
		Banf1
		Wdr1
		Tf
		Cd97
		Stam
		Uchl3
		Q8BH50
		B2m
		Ndufa4
		Cbx1
		Tfrc
		Shmt2
		Cd81
		Snx1
		Atp5f1b
		Arl6ip5
		Rps15a
		Ikzf1
		Psmd1
		Anp32b
		Nusap1
		Pfn1
		Nono
		Ahcy
		Ldha
		Cep250
		Zfand6
		Smc3
		Eloc
		Cacybp
		Tomm22
		Rpl22l1
		Cct5
		Sgta
		Ppp3ca
		Gstm1
		Ywhag
		Sdcbp
		Coro1b
		Glg1
		Serpina1e
		Itgb2
		Slc43a1
		Samhd1
		Gfi1b
		Sumo2
		Gsn
		Pzp
		Rtn3
		Cd79b
		Abi1
		Anln
		M6pr
		Sox6
		Tma16
		Cbx3
		Dynll2
		Stmn1
		Optn
		Cbx5
		U2af1
		Slc44a2
		Csde1
		P4hb
		Hspa8
		Itga1
		Reep5
		Naca
		Tln1
		Pbdc1
		Cct7
		Rbm8a
		Rpl34
		Trim28
		Vat1
		Ncstn
		Lgals3
		Psmd3
		Cycs
		Trir
		Actr3
		Gns
		Arhgdib
		Tnfaip8
		Hemgn
		Sf3b4
		Cox17
		Actbl2
		Lcp1
		Mrpl34
		Fh
		Txnl1
		Ptk2b
		Ptprc
		Phactr4
		Casp8ap2
		Arpc3
		Vwf
		Tagln
		Actn1
		Cdkn2d
		Rhoa
		Mrps36
		Pyhin1
		Dnajb1
		Dctpp1
		Hspa5
		Rpl18
		Hgs
		Cox7c
		Cd74
		Hnrnpl
		Pcnp
		Tuba1a
		Psmc3
		Rpl9
		Serpina1b
		Cndp2
		Pcna
		Adh5
		Capza1
		Specc1
		Hnrnpa3
		Hsp90ab1
		Klf1
		Tcp1
		S100a11
		Anxa6
		Pcmt1
		Rps3
		Psme2
		Kif5b
		Add2
		Brf1
		Prdx1
		Tmcc2
		Rps20
		Stat1
		Anxa1
		Acadl
		Ppp2r1a
		Prps1
		Fn1
		Cr2
		P01882
		Serbp1
		Pdap1
		Rwdd1
		Actl6a
		St13
		Pea15
		Cdc37
		2011-09-01
		Cct8
		Ddx39b
		Dstn
		Pa2g4
		Gapdh
		Eif5a
		Nme2
		Ywhaz
		Elof1
		Lyar
		Ptma
		Carhsp1
		Dmtn
		RTRAF
		Rpl27a
		Glrx3
		Tubb5
		Atpif1
		Mdh1
		Lsm1
		Arfgap3
		Cfdp1
		F10
		Txndc12
		Sfxn1
		Nedd9
		Hars
		Col14a1
		Vcam1
		Prdx5
		Tspan8
		Atg3
		Arhgdia
		Park7
		Ass1
		Gmfg
		Aqp1
		Icam1
		Bod1l
		Puf60
		Rpl28
		Ppp2cb
		Myh9
		Ahsp
		Rap1b
		Prdx3
		Serpina1a
		Rpl10a
		Akr1b1
		Gmnn
		Fermt3
		Rbm38
		Cd180
		Vtn
		Ms4a1
		Tnrc6b
		Rack1
		Pgk1
		Ddb1
		Txndc17
		Rps27
		Knstrn
		Ola1
		Rpa1
		Mcm4
		Iqgap1
		Acat1
		Zmat2
		Tpi1
		Ank1
		Slc4a1
		Ufc1
		Kpnb1
		Eml4
		Ahsa1
		Tgm2
		Pkm
		Rai14
		Mapk1
		Cmpk1
		Eif4a3
		Lrrc47
		Timm44
		Ighm
		Pdia4
		Esd
		Hspa9
		Ccna2
		Mfap1b
		Sars
		Foxo3
		Rps4x
		Uqcrc1
		D10Jhu81e
		Snx5
		Kif11
		Lsm6
		Psma7
		Bid
		Cox5b
		Dbnl
		Msn
		Picalm
		Arpc4
		Vdac1
		Snrnp40
		H2-K1
		Flna
		Sptbn1
		Hspd1
		Ripor2
		H2-Aa
		Phgdh
		Rad51ap1
		Pdia6
		Ddx1
		Pttg1
		Rac2
		Ablim1
		Nap1l1
		Gypa
		Atp5f1a
		Thumpd1
		Sypl1
		Rps13
		Ctsd
		Cox6b1
		Lsm4
		Mug1
		Anxa5
		Tmod3
		Gdi2
		Gimap4
		Ndufs1
		Serpina3k
		Bsdc1
		Dpysl2
		Supt5h
		Sf3b3
		Sssca1
		Serpina1d
		Ssna1
		Cyb5a
		Ppm1g
		Hsp90aa1
		Cat
		Arpc2
		Psmd9
		Rgcc
		Gspt1
		S100a4
		Ruvbl1
		Vcl
		Tufm
		Btf3
		Mki67
		Rps18
		Mat2a
		Aars
		Rpl11
		Ywhaq
		Clic1
		Pak2
		Cltc
		Q8K039
		Ywhab
		Rpl12
		Psme3
		Usp5
		Cd79a
		Nsfl1c
		Ube2n
		Aldh2
		Ywhah
		Sec31a
		Psmc1
		Impa1
		Cotl1
		Ctsb
		Ubap2
		Tipin
		Trap1
		Pcbp1
		Ap1b1
		Mtpn
		Sptan1
WT CHK1i	160	Mcam
		Pkia
		Tmed10
		Gabpa
		Ppia
		Rps6
		Mllt10
		Lrp1
		Psmf1
		Sdc4
		Srsf6
		Cd19
		Idi1
		Dnajc7
		Ppp1r14b
		Tfe3
		Macf1
		Mnt
		Ppig
		Safb
		Ddx5
		Reps1
		Ckb
		Rabep1
		Prpf40a
		Hba
		Hells
		Man2b1
		Rbm25
		Npc2
		Hbb-b1
		Cisd2
		Sh3bgrl
		Nup93
		Ufm1
		Lmnb1
		Tdrd3
		Zbp1
		Psmc3ip
		Smarcc2
		Ilf3
		Sash1
		Lamp2
		H2-D1
		Gga3
		Crcp
		Stip1
		Ranbp2
		Eif3g
		Grcc10
		Prkcsh
		Ctsl
		Agfg2
		Usp9x
		Timm9
		Anxa2
		Apoh
		Rrm2
		Mef2d
		U2af2
		Mtrex
		Plec
		Wdhd1
		Ranbp3
		Sptb
		Ctdp1
		Cav1
		Psap
		Cdc5l
		Casp3
		Tcf12
		Fabp5
		Des
		Rpl22
		Ppp1r7
		Sparc
		Lima1
		Eif4enif1
		Sp1
		Aip
		Gtf2a1
		Mettl2
		Cdk17
		Golga3
		Zpr1
		Knl1
		Mybbp1a
		Mapt
		Abce1
		Stom
		Sod3
		Plac9
		E2f4
		Bcap31
		S100a6
		Hsph1
		Gpkow
		Bcas2
		Gsr
		Nop2
		Klf3
		Necap2
		Fam114a2
		Plekho2
		Pkib
		Eif3b
		Pstpip1
		Ifitm3
		Hnrnpa2b1
		Mical1
		Fam32a
		Lmbrd1
		Akr1a1
		Gpx1
		Hmg20a
		Zyx
		Fkbp10
		Ttc1
		Rabep2
		Clic4
		Timm10
		Sdf2l1
		Hnrnpa0
		Fkbp7
		Arhgap30
		Bsg
		Zcchc8
		Fga
		Lgals3bp
		Ptbp1
		Timm13
		Grn
		Polr2d
		Dohh
		Stx7
		Zc3h8
		Inppl1
		Med29
		Rab1A
		Rbm17
		Ndufv2
		Hnrnpa1
		Cast
		Epb41
		Ccdc58
		Bag6
		Dbn1
		Fyb1
		Gnai2
		Srrt
		Ubxn7
		Ssrp1
		Usp14
		Rnase1
		Kpna4
		Lmna
		Eif3d
		Fkbp1a
		Lamp1
		Siglec1
CREL/WT no inhibitor	504	Selenbp1
		Med10
		Sugt1
		Prrc2a
		Tpt1
		Dhx9
		Ssu72
		Ruvbl2
		Luc7l2
		Pex19
		Psma4
		Scrib
		Bcl7a
		Plin3
		Rprd1b
		Wdr33
		Otub1
		Phax
		Rplp2
		Bak1
		Arcn1
		Rpl23a
		Ifi30
		Psmd11
		Glo1
		Rnf213
		Steap3
		Hypk
		Taf7
		Snrpe
		Hdgf
		Rps28
		Caap1
		Q80VP5
		Esf1
		Camp
		Serpinb6
		Tagln2
		Urod
		Egfr
		Ddx21
		Rnh1
		Limd2
		Krt16
		Mmrn1
		Alb
		Snx2
		Ppp1r2
		Ewsr1
		Polr1d
		Zfyve19
		Cbfb
		Maz
		Rpl37
		Mdc1
		Apex1
		Rtn4
		Ctsh
		Ndufs4
		Erp29
		Apoc1
		Prdx2
		Stx8
		Marcks
		Rrp1b
		Fam192a
		Aimp1
		Pin4
		C3
		Sirt1
		Mrpl41
		Myo5a
		Fam49b
		Hmgn5
		Ndufa7
		Calu
		Rbbp8
		Eif3h
		Psmd2
		Ptpn6
		Dync1i2
		Rbm5
		Treml1
		Eif2a
		Llph
		Med9
		Ctcf
		Caprin1
		Myl4
		Eif2s1
		Ndufb3
		Znf428
		Swap70
		Pdlim2
		Cct6a
		Apool
		Vim
		Uba2
		Prorsd1
		Champ1
		Pdcd6ip
		Pf4
		Jakmip1
		Tgoln1
		Vapb
		Uqcrb
		S100a9
		Twf2
		Prkar1a
		Vsir
		Lgmn
		Ftl1
		Fkbp2
		Rcc2
		Ppid
		Wfdc21
		Top1
		Cct4
		H2afz
		Gpatch11
		Dlgap4
		Map2
		Glrx5
		Paf1
		Glud1
		Cs
		Commd8
		Thbs1
		Fubp1
		Nufip2
		Ccdc117
		Fasn
		Gcsh
		Rsu1
		Coa6
		Ltf
		Ostf1
		Ctsz
		Bcam
		S100a10
		Polr3g
		Nucks1
		Ggt5
		Crip2
		Chchd2
		Fgfr1op2
		Setd2
		Lcn2
		Eef1b
		Rpl5
		Cebpg
		Gng11
		Ssb
		Apoa1
		Usp15
		Pld3
		Actg1
		Mcm10
		Eif1ad
		Ccdc88c
		Cope
		Gosr2
		Dctn2
		Rrp1
		Rps14
		Rexo2
		Sdhaf4
		Gid8
		Pomp
		Lig1
		Cnp
		Hexb
		Eif4a1
		Pdcd5
		Rps19
		Hmgb1
		Uba1
		Bpgm
		Snx12
		Surf6
		Mt2
		Gm2a
		Ece1
		Enpp4
		Chmp4b
		Fam122a
		Eif6
		Mic13
		Eif5
		Q9D727
		Arpc5
		Rpl10
		Mthfd1
		Coro7
		Prdx6
		Hist1h3a
		Gaa
		Mrpl50
		Psmb10
		Gpalpp1
		Ada
		Igkc
		Hnrnpd
		Q9D937
		Rpl35a
		Camk2d
		Eif4ebp1
		Nfya
		Srsf5
		Pygb
		Fabp4
		Smap
		Zcchc6
		Psmb8
		Chmp2a
		H2afy
		Rcn3
		Yy1
		Hdgfl3
		Zc3h4
		Epdr1
		Ubqln2
		Cnbp
		Asrgl1
		Kpna3
		Copb1
		Wbp11
		Ctsc
		Sdha
		Ppp1r14a
		Tra2b
		Nap1l4
		Cnn3
		Hspe1
		Hook3
		Kif4
		Eci1
		Dnajc9
		Ndufv3
		Psma6
		Hnrnpf
		Afdn
		Eif3l
		Fip1l1
		Smndc1
		Luc7l3
		Qprt
		Acp1
		Csk
		Nars
		Pdxk
		Map2k1
		Traf3ip3
		Rps23
		Rps27a
		Arpc1b
		Atp5l
		Kctd12
		Hnrnpdl
		Pkig
		Rsrc1
		Tubb2a
		Rrp15
		Zcchc9
		Fstl1
		Rps10
		Serpinb1a
		Cand1
		Cnn2
		Htatsf1
		Larp1
		Upf1
		Rangap1
		Cct3
		Tardbp
		Pafah1b2
		Tcea1
		Hmgb2
		Alad
		Polr2j
		Capg
		Dlgap5
		Fxr1
		Eif3i
		Nenf
		Mmtag2
		Pip4k2a
		Bcl10
		Dph3
		Bzw1
		Acsf2
		Top2a
		Itgb1
		Rps5
		Cd5l
		Sncg
		Ftsj3
		Arf3
		Mecp2
		Flot1
		Cse1l
		Ppp1r12a
		Sf3b1
		Dcps
		Gpi
		Scoc
		Mrfap1
		Khsrp
		Ddx3y
		Sart1
		Cdc42ep4
		Bag1
		Rbm42
		Zfand5
		Eif4ebp2
		Wac
		Vars
		Pacsin1
		Btf3l4
		Myl9
		Bag2
		Anp32e
		Cfi
		Rpl21
		Psmb6
		Sucla2
		Serpina6
		Pml
		Wtap
		Ndufs8
		Znf703
		Ces1c
		Dnajb11
		S100a8
		Retnlg
		Chtop
		Arhgap1
		Nop14
		Napg
		Pgd
		Hebp1
		Hexim2
		Dars
		Hrg
		Rtn1
		Bub3
		Mycbp
		Gypc
		Larp4b
		Cdv3
		Sf3a3
		Jpt2
		Rbbp7
		Ubap2l
		Acaa2
		Hnrnpab
		Phb
		Abi3
		Psma1
		Rpl18a
		Gtf3c6
		Myl12b
		Rnf181
		Csrp2
		H2-DMa
		Fam103a1
		Hpcal1
		Mzb1
		Ap2b1
		Grb2
		Zc3h18
		Etfb
		Sell
		Ifi35
		Tomm34
		Got2
		Abracl
		Atp5i
		Rpl29
		Rpl23
		Emb
		Tpd52
		Dffa
		Tgfb1i1
		Cd2
		Idh1
		Dlst
		Uqcrh
		Me2
		Anapc13
		Snrnp70
		Sumo3
		Sae1
		Serinc3
		Gatc
		Dnajb4
		Rps9
		Nolc1
		Nop53
		Ilf2
		Ptges3
		Selenoh
		Lum
		Pgam1
		Gmps
		Ppif
		Mcm7
		Mif
		Pinx1
		Sri
		Gtf2f1
		Bag3
		Q3UY34
		Uchl5
		Pitpna
		Kars
		Nucb2
		Plbd2
		Setd7
		Akap12
		Babam1
		Rps16
		Glod4
		Myl6b
		Ccdc86
		Kctd5
		Dync1h1
		Srsf7
		Ca2
		Ubac1
		Rps27l
		Ezr
		Eif3f
		Slc14a1
		Q9D7E4
		Aldh9a1
		Mrpl54
		Gadd45gip1
		Chmp5
		Eea1
		Fxyd5
		Prrc2c
		Tcof1
		Zranb2
		Ube2v1
		Tcf3
		Sp100
		Serpinc1
		Cd47
		Pum1
		Apoa2
		Psma5
		Api5
		Msrb3
		Psmd13
		Son
		Ly6d
		Rrm1
		Rps26
		Vapa
		Eaf1
		Ngp
		Myh11
		Hmmr
		Sp3
		Gsto1
		Mcm5
		Pin1
		Arglu1
		Gng5
		Erp44
		Hspa1b
		Arpp19
		Slirp
		Pycard
		Psmb2
		Triap1
		Slc16a1
		Rpl35
		Slbp
		Ndufs6
		Sfswap
		Dek
		Myl6
		Copb2
		Pafah1b1
		Wbp4
		Bgn
		Ide
		Casc3
		Tppp3
		Ncald
		Prpf3
		Eif3k
		Phpt1
		Lyz2
		Hdgfl2
		Ganab
		Slc29a1
		Apoc3
		Znf830
		Eif4e
		Adk
		Svil

## Sheet: Phosphosite down REL & WT CHK1i
Names	total	elements
REL vs WT down WT down CHK1i	186	Ppp1r35_S44;S46
		Arglu1_S92
		Q8BH50_S66
		Gpalpp1_S104;S121
		Clspn_S932
		Dmtn_T10
		Gypa_S166
		Lin52_[T51/S52/S53]
		Rrm2_S20
		Hexim2_S177;[S166/S168]
		Gch1_S24
		Atf1_S196
		Specc1_[S355/T357]
		Mki67_S2255
		Dmtn_S333
		Tpx2_S737
		Mki67_S2333
		Ubap2l_S629
		Sfswap_S903
		Rad23a_S205
		Mki67_[S1186/S1187]
		Klf3_S91;[S99/S100]
		Tnrc6b_[S598/S599]
		Brca1_S686
		Mki67_S2392
		Anln_S180
		Dmtn_S96;[S90/T91/S92]
		Sox6_S439;S442
		Hexim2_S75
		Clspn_[S42/S46]
		Tmcc2_S461
		Tcf12_S67
		Stmn1_S16;S25
		Hemgn_S124
		Eif4b_S422;T427
		Mki67_S1825
		Sdhaf4_S56
		Mki67_T1175
		Bod1l_S3000
		Mki67_S2934
		Add2_S692;S696;S700
		Gab1_S420
		Tcof1_S1191
		Prrc2b_S387
		Mki67_S2545
		Sox6_S454
		Sox6_S399
		Eif4ebp1_T69
		Hdgfl2_S640
		Hemgn_S171
		Hemgn_S103;S124
		Hemgn_S269
		Tmcc2_S435
		Dmtn_[S288/S289]
		Hemgn_S223
		Anln_[S292/S293]
		Atxn2_S741
		Clspn_[T1123/S1133]
		Otud5_[T502/S503]
		Thrap3_S315;S320
		Cenpc_S145
		Cwc25_S307;S309
		Prrc2b_S226
		Klf3_S71;S78
		Tnks1bp1_[S911/S912]
		Ddx21_S218
		Safb_S626
		Slbp_S182
		Dmtn_S226
		Dnttip2_S353
		Psme3_[T23/S24]
		Anln_S318
		Dmtn_S156
		Dmtn_S372
		Arpp19_[T22/S23]
		Ska3_S119
		Ubap2l_S628
		Lig1_S51
		Ybx1_S163
		Spen_S758;S762
		Nusap1_S69
		Mki67_S1342
		Rad51ap1_S254
		Tal1_S122
		Hemgn_T286
		Borcs7_[S44/S45]
		Mki67_T2073;[S2076/T2077]
		Otud5_[S445/S447]
		Gab1_S455
		Nup35_S73
		Fam122a_S144
		Mindy1_S440
		Mki67_S1000
		Mbd1_S556
		Prrc2b_S621
		Prrc2a_S1667
		Jpt2_S69
		Cdca3_S207
		Q8BH50_S143;S145
		Atf7ip_S533
		Stmn1_S46
		Eif4enif1_S77
		Clspn_S823
		Dnttip2_[S352/S353]
		Hnrnpab_S260
		Caap1_[T69/S71/S72/S73/S74]
		Mki67_T1952;S1955
		Hist1h1b_S18
		Ahsp_S102
		Rad23a_S125
		Hemgn_S213
		Nufip2_S213
		Mki67_S767
		Gab1_[S264/Y265/S266]
		Bod1l_S2841
		Klf3_S91;[S98/S99/S100]
		Klf3_S249
		Bod1l_S2968
		Cast_T479
		Mki67_T2162
		Mcm10_T85
		Tcf3_[S377/Y380]
		Mki67_[S2390/S2392]
		Eif4ebp1_T69;S100
		Mki67_T1363;S1366
		Dmtn_S152;S156
		Rad51ap1_S276
		Dmtn_S26;S22
		Ubap2l_S625;S628
		Mki67_[S1772/S1773]
		Lig1_[S188/S191]
		Cast_S219
		Taf7_S256
		Naca_S2138
		Srrm1_S655;S657
		Tcea1_S100
		Bmp2k_S685
		Cast_S466
		Carhsp1_S42
		Clspn_S740
		Clspn_S417
		Impa1_[S37/S38]
		Sox6_S466
		Klf3_S91;S100
		Prrc2a_[S1104/T1106/S1108];S1104
		Stmn1_S16
		Stmn1_S38
		Zc3h18_S71;T62
		Ddx21_S243
		Hexim2_S168
		Btf3_S156
		Otud5_S64
		Scnm1_S182
		Kiaa1211_S783
		Specc1_[T135/S136/S137]
		Cpeb4_[S97/S99]
		Zc3h11a_S743;S740
		Klf3_S91;S99
		Stmn1_S63
		Hemgn_S241
		Ybx3_S2
		Kiaa1551_[S1480/S1482]
		Dmtn_S87
		Ybx3_S52
		Ank1_S1675
		Specc1_S314
		Mki67_T1243;[S1246/T1247]
		Rad51ap1_S19;S23
		Hdgf_S132;S133
		Mcm2_S21;S27
		Nmt1_S47
		Dmtn_[S26/S28]
		Ppig_S714
		Mki67_[S2052/T2054]
		Hdgfl2_S366;S367
		Cep85_S16
		Specc1_S324
		Nucks1_S181
		Otud5_S165;S177
		Tmsb4x_T29
		Top2a_S1388
		Pex19_S35
		Mki67_S2649
		Top2a_S1328;S1333;T1350
		Mki67_S1187
		Mki67_T3021
WT down CHK1i	98	Bud13_S297
		Nsrp1_S31;S33
		Pom121_S355
		Usp10_[T205/S208]
		Zgrf1_S462
		Tbc1d5_S565
		Top2b_S1509;S1511
		Prrc2c_S1933
		Sox6_T410
		Clip1_S194
		Caprin1_[S21/S23]
		Alkbh5_[S384/S385]
		Rfc1_S244
		Add1_S586
		Tagln2_S163
		Lnpk_S411
		Uimc1_S689
		Reps1_S708
		Dek_S306;S308;S311;S312
		Ubap2l_S879
		Slc9a1_S801
		Bap18_T160
		Mki67_S2017
		Mfap1b_S118
		Brca1_S706
		Osbpl11_S15
		Nedd1_S379
		Brca1_S1152;S1154;S1150
		Clspn_S20;S42;S46
		Srrm1_[S1138/S1140]
		Anln_S259
		Smap2_S239
		Rragc_S381
		Prrc2c_[S1221/S1222]
		Talpid3_[S1223/S1224/T1225]
		Clip1_[T144/S146]
		Eloa_S195
		Eif3c_S39
		Lig1_T77
		Atxn2_S753
		Ythdf2_S2
		Hbb-b1_S45
		Zc3h13_S1086;S1090;S1093
		Bmp2k_S929
		Hba_S9
		Scaf1_S240
		Atad5_S452
		Mfap1b_S116;S118
		Q8BH50_S67
		Srrm1_S626;[Y623/S624]
		Prrc2c_[S1933/S1935]
		Zc3h18_S92;S106
		Cdca3_S197;S207
		Mki67_[S2133/S2134]
		Fcho2_S403
		Mki67_S2780
		Arhgap30_[T670/S671]
		Epn1_T420
		Mphosph10_S346
		Jmjd1c_S138;S135
		Tax1bp1_S693
		Mki67_S1587
		Srrm1_S743;T745
		Clip1_S146
		Top2b_S1537
		Fam122b_S119
		Erbin_S1013
		Crtc2_S612;S623
		Med1_S1225
		Mdc1_S442;T444
		Pml_S404
		Mylk_S1798;S1795
		Lsp1_S273
		Mphosph10_S164;S168
		Mphosph10_S164;S168;S172
		Bud13_S263
		Hmgn1_S7
		Trappc12_S234
		Rtn4_S651
		Slbp_S7
		Pja2_S320
		Zc3h18_S64
		Npm3_S147;S151;S155
		Bod1l_S240
		Anln_S513
		Mki67_T1952
		Wipi2_[S394/T397]
		Vasp_S317
		Eloa_S82
		Crtc2_S612
		Tab3_[S102/S103]
		Tmf1_[S397/T399]
		Fam122a_S140;S144
		Hbb-b1_[T85/S88]
		Dmtn_S152
		Nav1_S510
		Srrm1_T633;S635
		Dek_S33
REL vs WT down	337	Bcl11a_S447
		Fnbp4_S507
		Ddx21_S243;S245
		Acin1_S497
		Znf703_S257
		Ybx1_S163;S174
		Akap12_S350
		Tcof1_S169;T171
		Slc16a1_S491
		Zc3h13_S380
		Eif4ebp1_S64;T69
		Rplp2_S102;S105
		Phax_T80
		Tnks1bp1_S796
		Ank1_S1759
		Dkc1_S455;[S451/S453]
		Ccdc12_S165
		Nucks1_S113
		Kiaa1551_S1142
		Rbm3_S143
		Nucks1_T202;S204;S214
		Phactr4_S118
		Bod1l_S2001
		Sumo1_S2
		Eif4b_S498
		Prrc2a_T1110;T1106
		Sp3_S72
		Ncbp3_S495
		Bola1_S123
		Eif4b_S422
		Fip1l1_S235
		Nolc1_T410
		Larp4b_S601;S603
		Irs2_S1165
		Nolc1_T594
		Add1_T610
		Bag3_S404
		Zfand2b_S173
		Atxn2_S727
		Aplf_S238
		Fam122a_S73
		Tcof1_S1127
		Rplp2_S17
		Abcf1_S22
		Txlna_S523
		Ranbp3_S40;S32;S33
		Cdca2_S758
		Casc3_S65
		Srek1ip1_S143
		Clspn_S785;S787
		Cfdp1_T129
		Bdp1_S1870
		Bod1l_S2777
		Eif4ebp1_[S99/S100]
		Knop1_[T56/S57/S59]
		Nucks1_T202;S204
		Lrrfip1_S501
		Lrrfip1_S605
		Med19_S226
		Champ1_S603
		Rad51ap1_[S156/S158]
		Phax_S14;S16
		Wac_S62;S64
		Slc16a1_S213
		Eaf1_S165;S158
		Rrp15_S11
		Top2b_S1453
		Nucks1_S30;S19
		Pdlim5_S228
		Ppp1r35_S53
		Rere_S613
		Nucks1_S214
		Rnf213_S252
		Yaf2_[S151/S153/S154]
		Srrm2_S1465;T1467
		Fip1l1_S479;S487
		Myb_T530
		Mdc1_S929
		Tpr_S1259
		Ccdc86_S283
		Pja2_S306
		Q8BH50_S145
		Sash3_T61
		Apc_[S1435/T1437]
		Larp4b_S721
		Srrt_S74
		Bag3_S179
		Tcof1_S794
		Prrc2a_S378
		Nufip2_S376
		Hirip3_S331;S332;S328
		Bcl7b_S122
		Hdgf_[S132/S133]
		Kiaa1211_T852
		Add2_S614;[T622/S623/T626]
		Caap1_S183
		Lrrfip1_T525
		Brd8_T264;S268
		Add2_S602;S608
		Bin2_S392
		Atrx_S590
		Znf703_S231
		Synj1_S1350
		Hemgn_S171;S158
		Tcof1_T860;S853
		Tcof1_S593
		Bmp2k_S1010;S1012;S1013
		Eif4b_S93
		Rbm33_S816
		Patl1_T178
		Caap1_[S306/S307]
		Mrps36_S60
		Serbp1_S234
		Pdap1_S63
		Prrc2a_S342;S350
		Slbp_S110
		Caap1_S307
		Larp1_S81
		Rad51ap1_S23
		Gpatch4_S130
		Ccdc86_S18
		Eif4ebp1_T45
		Specc1_[S355/T357/S359]
		Snrpc_S17
		Tcof1_S456
		Cdv3_T205
		Safb_S366
		Jmjd1c_S436
		Tcf20_S612
		Atxn2_S859
		Srsf9_S205
		Prrc2a_[T377/S378]
		Nolc1_T594;T600
		Rplp2_S102
		Psip1_T122
		Wac_S53
		Med26_S361
		Srrm2_S1343;[S1338/S1339/S1340];S1338
		Eaf1_S165;[T157/S158]
		Caprin1_S8
		Prrc2c_S189;S192
		Tcof1_S843
		Fam122a_S264;S267
		Spn_S347
		Map2_T1609
		Prrc2c_T1238;T1240
		Bod1l_S2920
		Rplp2_S105
		Hexim2_[S52/T57]
		Srsf2_S206;S208;S212;[S220/S221]
		Szrd1_[S105/S107]
		Nop53_S305
		Zfand2b_S163
		Eif4ebp1_T69;S93
		Hemgn_T315
		Polr3g_S158
		Hnrnpd_[S82/S83]
		Mdc1_S732
		Wac_S64
		Eif4ebp1_T36;T45
		Ahctf1_S1792
		Znhit3_S76
		Mdc1_S168
		Cxcr4_S326
		Bclaf1_S289;Y283
		Rif1_S1683
		Zfp91_S106;[S85/S86]
		Ankrd17_S2055
		Mki67_S213
		Smap_S17
		Bag3_S390
		Zranb2_S120
		Larp4b_T735;S739
		Rcsd1_S378
		Hdgf_S206
		Lrrfip1_S302
		Nolc1_S585
		Srrm1_S461
		Mki67_S2425
		Jmjd1c_S471
		Wbp11_S353;S361;S364
		Tmpo_S66;S67
		Hirip3_S134;T135
		Eef1b_Y79
		Thrap3_S207
		Nol7_S129
		Prrc2c_S899
		Nucks1_S54;S58
		Lrrfip1_S547
		Sash3_S42;S38
		Nucks1_S73;S75;S79
		Nolc1_T599
		Zc3h4_S917
		Akap12_[T272/S273]
		Srek1ip1_S97
		Tcof1_T1132
		Dkc1_S481
		Eef1b_S106
		Zeb2_[Y1121/S1122]
		Rybp_S99
		Son_S1723
		Srrm2_S1179
		Hirip3_S80
		Gpbp1_S381
		Specc1_S359;T357
		Rai1_S1116
		Samd14_S77
		Irf2bp2_S250
		Rreb1_[T1598/S1600]
		Hdgf_S128;S132;S133
		Nucks1_S58
		Znf148_S306
		Rrbp1_S788
		Mcm2_[S40/S41]
		Smndc1_S201
		Akap13_S1253
		Tcof1_S1303
		Jpt1_T54
		Dkc1_S451;S453
		Nasp_S712
		Nucks1_T179;S181
		Ccdc86_S225;S252
		Ticrr_S1180;S1187
		Lrrfip1_S658
		Rad51ap1_S309
		Nop14_S96
		Nolc1_S312
		Rai1_T1058;T1062
		Pdap1_S60;S63
		Tcof1_S1216
		Mki67_T2106;S2103
		Znf592_S39
		Serbp1_S197
		Mcm2_S40
		Srsf5_S226;S228;S230
		Bcor_S423
		Rnf168_S262
		Mki67_S2390;S2392
		Bcor_[S1143/T1151]
		Ammecr1_S19
		Bin1_S296;S298;S304
		Lrrfip1_S649
		Lsp1_T166;S168;S180;S184
		Sart1_S480;S492
		Ftsj3_S576
		Prrc2c_T358
		Tmf1_[S137/S138]
		Mdc1_S461
		Ybx1_[T23/S27/T28]
		Bcl7a_[S156/S157]
		Hemgn_S135
		Ercc6l_S1021
		Spag7_S219
		Phax_S18;[S14/S16]
		Btf3_[S156/T158]
		Apc_[S2129/S2130]
		Sf1_S80;S82
		Ybx3_S359
		Prrc2c_S904;S901
		Phax_[T344/S347/T349]
		Acin1_T666
		Srrm2_S1284;[S1276/S1278]
		Add2_S602
		Rnf4_S98;S99
		Prrc2c_S189
		Slc14a1_S4
		Bcor_S1131
		Aldoc_S4
		Ptma_S10;T13
		Zc3h4_S92;S94
		Spag7_S158
		Incenp_T452;S454
		Ybx3_S33;S52
		Klf3_S71
		Hemgn_S171;S158;T155
		Apc_S2473
		Thrap3_S320
		Hdgf_S132
		Sde2_S281
		Ccdc86_S194
		Akap12_S1292
		Bclaf1_S177
		Thoc2_S1516
		Apc_S2674
		Nolc1_S563
		Hdgfl2_S635
		Srrm2_S1376;S1377;S1378;S1380
		Q8BH50_T149
		Zeb1_S624
		Zc3h13_T263;S265
		Srrm2_T973
		Tcof1_T171
		Cep170_S1069
		Hdgf_S128
		Srsf2_S189;S191
		Zranb2_S188
		Add2_S618;[T612/S614]
		Hexim1_[S98/T99]
		Ubap2l_S436
		Szrd1_S37;S39
		Srrm2_S796;S797
		Tcof1_S1242
		Top2b_S1453;[S1444/S1448]
		Prrc2c_S2646
		Hirip3_S396
		Eps15_S816
		Gtf2f1_T389
		Kmt2d_S2597
		Rplp2_S79
		Tcof1_T803
		Cfdp1_S203
		Zranb2_S153
		Cdk13_T495
		Mki67_S1734
		Brca1_S717
		Hemgn_S435
		Bcl11a_S625;S630
		Jmjd1c_S459
		Hemgn_S380
		D1Ertd622e_S25
		Gnl3_S95
		Ahctf1_S1541
		Znf830_S342
		Nolc1_S646
		Tcof1_S852
		Spen_S2134
		Atf7_S82
		Bap18_S96
		Ybx1_S172
		Map2_S1783
		Foxo3_S285
		Add2_S698
		Ybx3_S328
		Jpt1_[S85/S88]
		Tcof1_S1113
		Eaf1_[T157/S158]
		Nmt2_S38

## Sheet: Total down in REL & WT CHK1i
Names	total	elements
REL vs WT down WT down CHK1i	119	Dnajb1
		Dctpp1
		Cdca3
		Pclaf
		Tf
		Pcnp
		Timm44
		Q8BH50
		Edf1
		Ybx3
		Ccna2
		Mfap1b
		Tpx2
		Tfrc
		Dnpep
		Specc1
		Foxo3
		Dld
		Cd81
		Klf1
		Kif11
		Eif1
		Lsm6
		Bid
		Add2
		Picalm
		Brf1
		Rpia
		Tmcc2
		Nusap1
		Sod2
		Cep250
		Zfand6
		Rad51ap1
		Serbp1
		Pdap1
		Otud5
		Gata1
		Sdcbp
		Pttg1
		Zfand2b
		Rad23a
		Slc43a1
		Ablim1
		Q80WR5
		Gfi1b
		Sumo2
		Gypa
		Lsm4
		Fahd1
		Ska3
		Mapk1ip1l
		Lyar
		Anln
		Cox19
		Sox6
		Tma16
		Bsdc1
		Ptma
		Hmgb3
		Cdca5
		Stmn1
		Optn
		Carhsp1
		Jpt1
		Ndufaf2
		Dmtn
		Hmbs
		Atpif1
		Ssna1
		Gpbp1
		Naca
		Lsm1
		Arfgap3
		Cyb5a
		Cfdp1
		Tal1
		Tacc3
		Sfxn1
		Psmd9
		Rgcc
		Tspan8
		Cycs
		Trir
		Btf3
		Mki67
		Aqp1
		Bod1l
		Eri1
		Ahsp
		Hemgn
		Gch1
		Cox17
		Eif4b
		Q8K039
		Snca
		Gmnn
		Psme3
		Mrpl34
		Rbm38
		Phactr4
		Tnrc6b
		Casp8ap2
		Lsm2
		Ccdc32
		Cd82
		Ybx1
		Svbp
		Impa1
		Clspn
		Ubap2
		Tipin
		Knstrn
		Cdkn2d
		Q8VCE4
		Zmat2
		Mrps36
		Slc4a1
		Ank1
WT down CHK1i	39	Cdk17
		Knl1
		Hmg20a
		Ttc1
		Sash1
		E2f4
		Psmf1
		Bsg
		Sdc4
		Agfg2
		Gsr
		Idi1
		Ppp1r14b
		Rrm2
		Zc3h8
		Klf3
		Necap2
		Mnt
		Ppig
		Cast
		Wdhd1
		Epb41
		Sptb
		Ccdc58
		Fam114a2
		Pkib
		Hba
		Casp3
		Tcf12
		Pstpip1
		Rpl22
		Hbb-b1
		Fam32a
		Eif4enif1
		Tdrd3
		Gtf2a1
		Gpx1
		Mettl2
		Psmc3ip
REL vs WT down	223	Coa6
		Prrc2a
		Larp1
		Upf1
		Pex19
		Bcl7a
		Scrib
		Polr3g
		Wdr33
		Phax
		Nucks1
		Crip2
		Rplp2
		Rpl23
		Rpl29
		Bak1
		Tcea1
		Chchd2
		Rpl23a
		Setd2
		Eef1b
		Hmgb2
		Tgfb1i1
		Cd2
		Rpl5
		Rnf213
		Steap3
		Cebpg
		Alad
		Ssb
		Hypk
		Dlst
		Uqcrh
		Taf7
		Anapc13
		Hdgf
		Snrnp70
		Sumo3
		Rps28
		Caap1
		Dlgap5
		Q80VP5
		Mcm10
		Serinc3
		Gatc
		Fxr1
		Eif1ad
		Ccdc88c
		Esf1
		Nenf
		Dnajb4
		Mmtag2
		Dph3
		Ddx21
		Nop53
		Nolc1
		Krt16
		Sdhaf4
		Pomp
		Lig1
		Ppp1r2
		Top2a
		Ewsr1
		Pinx1
		Zfyve19
		Pdcd5
		Maz
		Cd5l
		Gtf2f1
		Rpl37
		Ftsj3
		Mdc1
		Bag3
		Rps19
		Q3UY34
		Hmgb1
		Nucb2
		Akap12
		Surf6
		Flot1
		Kctd5
		Ccdc86
		Mt2
		Ndufs4
		Srsf7
		Ubac1
		Chmp4b
		Sf3b1
		Q9D7E4
		Slc14a1
		Fam122a
		Marcks
		Mic13
		Mrpl54
		Rrp1b
		Q9D727
		Fam192a
		Rpl10
		Hist1h3a
		Gadd45gip1
		Gaa
		Pin4
		Mrfap1
		Scoc
		Mrpl50
		Chmp5
		Eea1
		Fxyd5
		Gpalpp1
		Khsrp
		Hnrnpd
		Ddx3y
		Sart1
		Sirt1
		Prrc2c
		Mrpl41
		Myo5a
		Tcof1
		Zranb2
		Q9D937
		Hmgn5
		Ndufa7
		Calu
		Tcf3
		Rbbp8
		Eif4ebp1
		Cdc42ep4
		Rbm42
		Srsf5
		Nfya
		Cd47
		Pum1
		Smap
		Msrb3
		Zfand5
		Eif4ebp2
		Zcchc6
		Rbm5
		Wac
		Eif2a
		Btf3l4
		Son
		Llph
		Cfi
		Rcn3
		Psmb6
		Eaf1
		Yy1
		Med9
		Ctcf
		Zc3h4
		Caprin1
		Epdr1
		Hmmr
		Ubqln2
		Sp3
		Znf428
		Cnbp
		Pin1
		Arglu1
		Znf703
		Gng5
		Arpp19
		Vim
		Slirp
		Wbp11
		Champ1
		Triap1
		Slc16a1
		Ppp1r14a
		Tgoln1
		Chtop
		Nop14
		Hspe1
		Hebp1
		Hexim2
		Kif4
		Slbp
		Ndufv3
		Uqcrb
		Afdn
		Fip1l1
		Gypc
		Larp4b
		Smndc1
		Cdv3
		Ndufs6
		Sfswap
		Qprt
		Jpt2
		Wbp4
		Ubap2l
		Hnrnpab
		Casc3
		Ncald
		Tppp3
		Top1
		Prpf3
		Gtf3c6
		Map2
		Rnf181
		Glrx5
		Nars
		Csrp2
		Hdgfl2
		Rps27a
		Slc29a1
		Fam103a1
		Fubp1
		Znf830
		Hnrnpdl
		Pkig
		Mzb1
		Rsrc1
		Svil
		Nufip2
		Rrp15
		Ccdc117
		Zcchc9
		Zc3h18
		Fstl1
		Gcsh
		Sell

## Sheet: mRNA vs protein REL vs WT
Names	total	elements
Protein encoding transcripts down in REL vs WT Proteins down in REL vs WT	219	Bcl7a
		Wdr33
		Phax
		Steap3
		Hdgf
		Sod2
		Rpl37
		Ndufs4
		Fahd1
		Llph
		Caprin1
		Tacc3
		Uqcrb
		Map2
		Ccdc32
		Pclaf
		Chchd2
		Mcm10
		Nusap1
		Lig1
		Rps19
		Gpalpp1
		Afdn
		Fip1l1
		Rps27a
		Hnrnpdl
		Rrp15
		Larp1
		Sf3b1
		Mrfap1
		Khsrp
		Psmb6
		Sfxn1
		Gypc
		Cdv3
		Knstrn
		Zmat2
		Rpl29
		Lsm6
		Snrnp70
		Serinc3
		Gatc
		Srsf7
		Ubac1
		Mrpl54
		Mki67
		Ndufs6
		Psme3
		Prpf3
		Svil
		Bak1
		Dld
		Taf7
		Eif1
		Caap1
		Ddx21
		Sirt1
		Ska3
		Mrpl41
		Hmgn5
		Rbbp8
		Vim
		Eri1
		Top1
		Lsm2
		Fubp1
		Ssb
		Eif1ad
		Sdhaf4
		Pdcd5
		Hmgb1
		Surf6
		Mt2
		Sumo2
		Rpl10
		Mrpl50
		Cox17
		Dctpp1
		Fxr1
		Top2a
		Serbp1
		Sart1
		Lyar
		Btf3l4
		Chtop
		Ubap2l
		Csrp2
		Sell
		Ccna2
		Anapc13
		Pinx1
		Gtf2f1
		Nucb2
		Kctd5
		Lsm4
		Tcof1
		Tcf3
		Hmmr
		Pin1
		Gng5
		Slc16a1
		Slc29a1
		Tipin
		Cdca3
		Rpia
		Ppp1r2
		Rrp1b
		Mapk1ip1l
		Calu
		Hmgb3
		Eif2a
		Ndufaf2
		Med9
		Gpbp1
		Ybx1
		Ccdc117
		Polr3g
		Setd2
		Rpl5
		Pomp
		Tma16
		Yy1
		Naca
		Wbp11
		Kif4
		Smndc1
		Rsrc1
		Zcchc9
		Tcea1
		Hmgb2
		Dph3
		Pdap1
		Eif4ebp2
		Atpif1
		Cfdp1
		Nop14
		Larp4b
		Gmnn
		Rbm38
		Zc3h18
		Slc4a1
		Rpl23
		Bid
		Nolc1
		Rad51ap1
		Bag3
		Akap12
		Gadd45gip1
		Prrc2c
		Ssna1
		Btf3
		Impa1
		Ybx3
		Tpx2
		Rpl23a
		Hypk
		Rps28
		Esf1
		Ewsr1
		Maz
		Rad23a
		Fam192a
		Pin4
		Ndufa7
		Cox19
		Cdca5
		Jpt1
		Hmbs
		Ctcf
		Champ1
		Eif4b
		Glrx5
		Clspn
		Gcsh
		Nucks1
		Tfrc
		Slc43a1
		Hnrnpd
		Eif4ebp1
		Srsf5
		Nfya
		Anln
		Stmn1
		Cnbp
		Cycs
		Hspe1
		Mrpl34
		Nars
		Casp8ap2
		Pkig
		Mrps36
		Fstl1
		Upf1
		Pcnp
		Dlgap5
		Ftsj3
		Cdc42ep4
		Ptma
		Wac
		Hnrnpab
		Gtf3c6
		Fam103a1
		Mzb1
		Timm44
		Dlst
		Uqcrh
		Kif11
		Sumo3
		Ccdc86
		Zranb2
		Sp3
		Arpp19
		Slirp
		Psmd9
		Slbp
		Sfswap
		Wbp4
		Hdgfl2
		Ubap2
Protein encoding transcripts down in REL vs WT	4451	Sergef
		Dhx9
		Ssu72
		Srrm1
		Ube2l3
		Ruvbl2
		Eif2b2
		Cd3eap
		Mettl13
		Zfp607a
		Ifrd2
		Setd6
		Scaf11
		Katnbl1
		Psma4
		Nfatc2ip
		Dnajc21
		Trmt5
		Snip1
		Otub1
		Ptgr1
		B9d2
		Ppia
		Blvrb
		Atp13a1
		Sar1b
		Rpl23a-ps3
		Ak2
		Dctn3
		Strbp
		Gpn3
		Zfp772
		Gdpd2
		Nkain1
		Psmg2
		Actn4
		Med4
		Smpd3
		Psmd11
		Ermp1
		Hprt
		Glo1
		Mcm3
		Tigar
		Gtf2e2
		Dhrs7b
		Rhebl1
		Glrx2
		Lsg1
		Utp20
		Rad54l
		Fads1
		Odc1
		Slc25a15
		Gpr31b
		Chst12
		4930539E08Rik
		Rnaseh2c
		Ddx52
		Sspn
		Etfa
		Nup188
		6030458C11Rik
		Pithd1
		Pmm1
		Dnajc11
		Stk24
		Uri1
		Oip5
		Vps4b
		Immp2l
		Mrps9
		Prkag2
		Stt3a
		Nmt1
		Rbm22
		Hscb
		Pnpt1
		Nup210
		Cerk
		Tomm6
		Pole3
		Ccdc106
		Napsa
		BC030867
		Sh3rf1
		Mad1l1
		Riok3
		Hist1h2bh
		Atp6v1e1
		Tnpo1
		Adal
		Spata24
		Prps1l3
		Cbfb
		2810004N23Rik
		Pcbd2
		Melk
		Dda1
		Mzt2
		Ccp110
		Rac3
		Apex1
		Eef1g
		Arl8b
		Atp7b
		Taf5l
		Pfkl
		Nop9
		4921524J17Rik
		Cinp
		Sec13
		Atad5
		Glyr1
		Nln
		Nid2
		Mrpl38
		Ehmt1
		Xxylt1
		Dnajc7
		Ccdc134
		Tor3a
		Ppp1r14b
		Nsa2
		Nup37
		Moap1
		Sppl2b
		4930503L19Rik
		Efl1
		Rpp14
		Aimp1
		Rpl24
		Mrpl48
		Gm12184
		Timp1
		Zfp703
		Fam207a
		Aida
		Larp7
		Wdr3
		Fsbp
		Baz1a
		Cmtr2
		Ap1s1
		Ptprs
		Pnkd
		Cep76
		Ppig
		Fam49b
		Nedd8
		Tubb4b
		Rragb
		Rnaseh2b
		Ddx42
		Tysnd1
		Nr6a1
		Lta4h
		Smyd2
		Eif3h
		Med14
		Gm38394
		C1qbp
		Eef2
		Xndc1
		Ubqln1
		Eed
		Cggbp1
		Ssr3
		Szrd1
		Zfp277
		Xk
		Mpv17l
		Eef1d
		2002-03-01
		Nudcd3
		Cryl1
		Lztfl1
		Dclre1b
		Alms1
		Brms1l
		Slc25a33
		Lrrc59
		Nmral1
		Srsf9
		Ppp2ca
		D11Wsu47e
		Mtx3
		Prdx4
		Eif2s3x
		Hlcs
		Rpl27
		Fh1
		Lipt1
		Mrm3
		Nts
		Thap12
		Thumpd2
		Cops9
		Fgd6
		Ndufb3
		Rtf1
		Dab2ip
		Mdm4
		Senp3
		Cab39l
		Tomm40
		Zzz3
		Zdhhc16
		Mrpl1
		Gm595
		Pim3
		Xrcc3
		Sfr1
		Mybl1
		Cbll1
		Rfc4
		Ube2m
		Mrps33
		Pla2g12a
		Rnf168
		Jakmip1
		Cops4
		Mdm1
		Metrn
		Bcat1
		Ankrd49
		Cox7b
		Npm1
		Slc31a1
		Gclm
		Cep63
		Ran
		Trnt1
		Fcgr4
		Mapk7
		Creld2
		Acbd6
		Ttc7b
		Tars2
		Ddx3x
		Tvp23b
		Rfwd2
		Mcat
		Calr
		Mt1
		Lars2
		Clca2
		Dpy19l1
		Rps8
		Ss18
		Gtse1
		Cipc
		Riox2
		Csnk2b
		2007-09-01
		Nop56
		Lrfn4
		Rcc2
		Stag2
		Spink11
		Suclg1
		Zfhx3
		Ykt6
		Isca2
		Gne
		Ccl3
		G430095P16Rik
		Tctn3
		Fancl
		Tfb2m
		C3ar1
		Exosc10
		Sil1
		Mthfd1l
		Tmco1
		E2f5
		Pola2
		Nsmce3
		Qtrt1
		Spred1
		Taf6l
		Selenoi
		Ostc
		Mtpap
		5430427O19Rik
		Rbm43
		Dimt1
		Gars
		Got1
		Phf10
		Galnt12
		Nelfa
		B3galnt2
		Tmprss13
		Smc6
		Srp68
		Psmc6
		Ttf2
		Taf1b
		Ppp4r1
		Pgm2
		Nus1
		Cenpv
		Banf1
		Ldah
		Ndufs7
		Coq6
		Tut1
		Qrsl1
		Atp5h
		Tpr
		Hacd3
		Fkrp
		Lrrc20
		Ndufa9
		Rpusd4
		Stam
		Ilf3
		Reln
		Poll
		Mrps27
		Tfb1m
		Hist1h3c
		Prepl
		Zfp64
		Srsf3
		Isca1
		Rpl26
		Enpp3
		Rer1
		Hist1h4i
		Nmd3
		Fmr1
		Shmt2
		Adamts4
		Otud6b
		Plekha2
		Lrpprc
		Elmo1
		Mrps26
		Cdk1
		Yes1
		Mcm8
		Ncaph
		Fem1c
		Diaph3
		Ube2g1
		Wrb
		Zfp961
		Polr2c
		Oser1
		Fastkd2
		Nsun2
		Naa38
		Hbs1l
		Gm35315
		Anp32b
		Abcb6
		Tuba1b
		Mfsd12
		Cdca7
		Rbm15
		Emc8
		Ahcy
		Ndufs2
		Ghitm
		Pbk
		Mtg1
		Rexo2
		Clec4d
		Dhcr7
		Sms
		Dhx37
		Zik1
		Eif3g
		Ppargc1b
		Spata7
		Pqbp1
		Eloc
		Taf6
		Chaf1b
		Msh6
		Nkrf
		Camta1
		Cux1
		Mkks
		Tomm22
		Alg8
		Smyd3
		Hist1h2ae
		Heatr3
		Imp3
		Kcnk1
		Cdca2
		Nol10
		Timm9
		Cox15
		Tjap1
		Traf3ip1
		Uba1
		Pcsk4
		Mcrip2
		Fbxo45
		Gemin8
		Dusp12
		Maip1
		Srp19
		Qtrt2
		Katnb1
		Prmt6
		Vdac2
		Dhdds
		Pdcl3
		Tmem252
		Cdc20
		Nubp1
		Ctdspl2
		Hmgxb3
		Nup153
		Chsy1
		Mfsd2a
		Emp3
		Nfyc
		Pomc
		Slco4a1
		Nkiras2
		Anapc4
		Eif6
		Galk1
		Bax
		Nsdhl
		Ube2d2a
		Mthfd1
		Gm16867
		Cnot9
		Ints1
		Psmd5
		Pank1
		Dnmt1
		Smg8
		Galnt7
		Hoxb5
		Bclaf1
		0610012G03Rik
		D8Ertd738e
		Syk
		Traf7
		Pxt1
		Fanca
		Ik
		Josd1
		Wdhd1
		Nfs1
		Wdr83
		Nrm
		Nudt19
		Dnaja3
		Nxt2
		Aurka
		H2afy
		Gm21761
		Polr2l
		Chmp7
		Ccar2
		Shank2
		Cyfip2
		Fam185a
		Poldip2
		A830080D01Rik
		Pbdc1
		Urb1
		Cdkn2aipnl
		Asrgl1
		Cct7
		Nup205
		Copb1
		Mtr
		Tube1
		Gtf3c1
		Aifm1
		Ccnc
		Thoc7
		Cldn10
		2610318N02Rik
		Zfp580
		Rmi1
		Lman2
		Nom1
		Bdp1
		Tcf19
		Jade1
		Tsen54
		Cdpf1
		Mrpl13
		Klhdc3
		Mbd1
		Taf12
		Dtd1
		Tubb3
		Wdr92
		Gm10076
		Srek1ip1
		Arhgdib
		Leo1
		Aasdh
		Rps12-ps3
		Vps50
		Tigd3
		Hnrnpf
		Wdr36
		Morf4l1
		Tnfaip8
		Myef2
		Luc7l3
		Sf3b4
		Odf2
		Agps
		Pds5b
		Rep15
		Txnl1
		Kat7
		Entpd6
		Mtrr
		Hira
		Klf8
		Nhp2
		Smim8
		Pus7l
		Neurog3
		Exosc5
		Cdc45
		Med25
		Pphln1
		Eps8
		Brf2
		Dph5
		Akip1
		Zfp609
		Polr3b
		Slc23a1
		Pde6d
		Eya3
		Fam98b
		Mrpl33
		Vmn2r60
		Clpx
		Rpf1
		Uhrf1
		Ncbp1
		Itgb3bp
		Mettl2
		Ccdc114
		Ints14
		Gm4724
		Trem2
		Fam50b
		Tyw3
		Fancf
		Lamtor3
		Asf1a
		Pan2
		Snapc4
		Arl6ip4
		Snd1
		Nacc2
		Cand1
		Atg5
		Hspa5
		Mta2
		Tnpo2
		Cdc123
		Frg1
		Polr1c
		Lrrc40
		Mlst8
		Gps1
		Rangap1
		Prpf38b
		Rpl9
		Rabggtb
		2310057M21Rik
		Rad51c
		Fsip1
		Mmadhc
		Exo5
		Tardbp
		Rps17
		Mybbp1a
		Ints11
		Hes1
		Pgm2l1
		Wbp2nl
		Aatf
		Cndp2
		Gm16286
		Rere
		Lin54
		Adh5
		Pcna
		Wdr53
		Metap2
		Mgat4c
		B3galt6
		Ttl
		1810037I17Rik
		Ammecr1l
		Nfyb
		Ppa2
		Pigs
		Suz12
		Serp1
		Mff
		Cluh
		Pdss1
		Ftsj1
		Tomm20
		H2afv
		Pdha1
		Mtor
		Bcap31
		Nploc4
		Yrdc
		A130010J15Rik
		Noa1
		Aimp2
		Ino80
		Naa25
		Blm
		Tomm7
		Cd244
		Eri3
		Smg5
		Rab3b
		Alg10b
		Cox7a2
		Brd8
		Ss18l2
		Zdhhc1
		Rps20
		L2hgdh
		Hic2
		Tfg
		Mfsd7b
		Psma3
		Pi4k2b
		Nup62
		Cep57
		Stk35
		Vps29
		Psmg1
		Eif2b3
		Ppp2r1a
		Lsm3
		Wdr34
		Mterf4
		Polr3d
		Rabl3
		Rcor2
		Ccdc163
		Acads
		B9d1
		Myo7a
		Gpn2
		Rwdd1
		Tom1l1
		Gm21992
		Mcee
		Enkd1
		Pgm3
		Upf3a
		Tmed7
		Carm1
		Smad5
		Hsd17b10
		Cd109
		Rpl36
		Sqle
		Traip
		Acsl3
		Mbtd1
		Ipo8
		Mettl4
		Nop2
		Npepl1
		Lman1
		Sclt1
		Nt5dc2
		BC003331
		Mgme1
		Xpo7
		Ndufb10
		Idh3b
		Recql
		Aldh1b1
		Prkag3
		Helb
		Cct8
		Mcm2
		Susd1
		Plekhg3
		Mrs2
		Ndufb4
		Rps6kl1
		Bbip1
		Pa2g4
		Pdhx
		Mapk8
		Plekha5
		Sdhaf3
		Camk2a
		Ldoc1l
		Terf2
		Ifi209
		Cep104
		Nme2
		Rabif
		Gpi1
		Cnot11
		Elof1
		Fam136a
		Cul4b
		Abhd14a
		Abcb8
		Plpp6
		Pcif1
		Mbip
		Thoc6
		2210418O10Rik
		Tecpr2
		Minos1
		Rps2
		Fam216a
		Synj2bp
		Glrx3
		Slc36a4
		Tspan4
		Rsrc2
		Pigq
		Mdh1
		Mapre2
		Hax1
		Fam118a
		Matr3
		Slc19a2
		Rfx2
		5730480H06Rik
		F10
		Tmem255a
		Blzf1
		Lox
		Mrpl9
		Abhd13
		Nhlrc2
		Smim26
		Xkr5
		Cox6c
		Fbxl2
		Bin1
		Rps7
		Rpa3
		E2f6
		Kif2a
		Pola1
		Mrps18b
		Arhgdia
		Gnl2
		Ociad1
		Eif3b
		Thap11
		Toe1
		Mrps34
		E2f7
		Zfp786
		D930048N14Rik
		Ppp2r2d
		Wdr70
		Baz1b
		Paics
		Fbxo21
		Pcid2
		Pot1a
		Nutf2-ps1
		Tmem106c
		Bub3
		Dgke
		Umps
		Gon7
		Stil
		Dap3
		Plp2
		Gpsm2
		Ankle2
		Prdx3
		Ccne2
		Cxcl14
		Rbbp7
		Lancl1
		Bend3
		Ap2a1
		Ccdc15
		Bud31
		Ctage5
		Rita1
		Adprh
		Eif2s2
		Prkar2a
		Coa3
		Desi2
		Dtwd1
		Simc1
		Hnrnpa2b1
		Parpbp
		Kif22
		Nudcd2
		Adat1
		Cops3
		Fam32a
		Zfp661
		Ndufaf6
		Rcc1
		Josd2
		Mettl15
		Asf1b
		Dscc1
		Tomm40l
		Utp14a
		Ndufb7
		Dicer1
		2700060E02Rik
		Acat1
		Coa7
		Rbfa
		Srpr
		Tpi1
		Ap2s1
		Usp37
		Atr
		Polr2e
		Snrpa1
		2010-09-01
		Egfl6
		Hist1h2ag
		Pkm
		Tomm34
		Cmpk1
		Bbs12
		AB124611
		Hpf1
		Ccar1
		Pdia4
		Ttc1
		Pprc1
		Parl
		Cox16
		Nfatc3
		Borcs7
		3110009E18Rik
		Fbxo3
		Ndufaf7
		Pask
		Clic4
		Prep
		Rad21
		Arntl
		1500011B03Rik
		Prmt7
		Psmd6
		4933413G19Rik
		Trhr2
		Rtca
		Rnf141
		Cntrob
		Nubp2
		Dnaja2
		Dcbld1
		Disp2
		Atp5g1
		Utp11
		Cnot1
		Hnrnpa0
		Anapc5
		Dck
		Cyb5r4
		Armt1
		Gtf2a2
		Mthfd2
		Commd10
		Erh
		Dazap1
		Eif1b
		Stx18
		Eif2ak1
		Edrf1
		Itga9
		Vdac1
		Snrpc
		Myo1c
		Snrnp27
		Lins1
		Psmc5
		Coq7
		Exoc5
		Ilf2
		Fhit
		Ptges3
		Zranb3
		Cdk9
		Pigf
		Mbtps1
		Pgam1
		Hspd1
		Ppif
		Zdhhc21
		Mcm7
		Ufl1
		Nup54
		Adarb1
		Socs6
		Kdm1a
		Tmem69
		Oxa1l
		Fam204a
		Rpl17
		Thoc1
		C5ar1
		Nup107
		Hmgn2
		Stag1
		Uchl5
		Prelid3b
		Trub1
		Gm7334
		Kars
		Nudt2
		Mrpl53
		Babam1
		Rps16
		Taf5
		Gm5141
		Atp5c1
		Mrpl32
		Pknox1
		Mtmr2
		Timm13
		Chchd1
		Gusb
		Terf1
		Ppp2r5d
		Cdr2
		Polr2d
		Dera
		Klhl14
		Dcaf12
		Trmt10c
		Zbtb41
		Olfr1388
		Myg1
		Iws1
		Zfp91
		Rbm7
		Wdr48
		Morn2
		Ncapg
		Palb2
		Pcgf6
		Gm29666
		0610009B22Rik
		Ints7
		Nrros
		Tkt
		Snx3
		Phf6
		Arhgap33
		Mrpl12
		Ecd
		Shq1
		Drp2
		Mrm2
		Txndc9
		Trem3
		Tdg
		Exosc6
		Ccdc115
		Fen1
		Nemp1
		Api5
		Timm29
		Uba6
		Ttc30a1
		Gnat3
		Kyat1
		Far1
		Kcnn4
		Rbm14
		Cul4a
		Psmd13
		Smim11
		Ccny
		Neil3
		Nme4
		Serinc5
		Entpd7
		Cisd1
		Kif5a
		Dctn5
		Rps26
		Vapa
		Gm14410
		Trmt2a
		Atf6
		Tubg1
		Kctd3
		Stard4
		Gin1
		Timm8a1
		Eprs
		Cdc42
		Rpe
		Smim20
		Gsto1
		Nbn
		Ehd2
		Nle1
		Slc25a3
		Gnl3l
		Spryd4
		Med20
		Ctbp1
		Gm12689
		Sumo1
		Mbd2
		Clcn3
		Ddx23
		Gtpbp10
		Ubald2
		Cspp1
		Txn2
		Rrp12
		Fam98a
		Ptk2
		Fanci
		Mcph1
		Hjurp
		Cpsf6
		Ubxn7
		Calr3
		Rbm34
		Rftn1
		2200002J24Rik
		Mrps11
		9430038I01Rik
		Atp5b
		Clp1
		Depdc5
		Cops7a
		Syce2
		Ehmt2
		Tssc4
		Brip1
		Rad51b
		Dcp1a
		Mat2a
		Tmem86b
		Itln1
		Clic1
		Hoxb4
		Ino80e
		Copb2
		Amd1
		Psat1
		Nxt1
		Apobec2
		Ywhab
		Timm50
		Atg9b
		Hdhd3
		Lmtk2
		Cd79a
		Rpl10-ps3
		Elac1
		Mtif2
		Btrc
		Knop1
		Ethe1
		Txlna
		Cit
		Myo18b
		Golga7
		Ctnnb1
		Orc6
		Patl1
		Rsl24d1
		Lgals1
		Tdp1
		Csnk1e
		N6amt1
		Taf1a
		Plekha3
		Eif4e
		Trap1
		Raf1
		Pcbp1
		Epg5
		N4bp2l2
		Dnaaf2
		Kdelr2
		Sdhb
		Traf6
		Krt10
		Atp23
		Plxnb2
		Atrip
		Akap17b
		Zfp706
		Thoc3
		Prkaa1
		Ncapg2
		Mcam
		Foxp1
		Pycr1
		Pabpc1
		Igbp1
		Dis3l2
		Cep128
		Ssr1
		Gabpa
		Rbm10
		Strap
		Fam107b
		Tsta3
		Zc3h14
		Arfgef1
		Psma2
		Syngr4
		Pramel4
		Selenof
		Bet1
		Mmab
		Kdsr
		Wdr4
		Prkar2b
		Rps12
		Sdad1
		Pex2
		Lgalsl
		Prpf31
		Pcdhgc3
		Alpk2
		Nutf2
		A430005L14Rik
		Riox1
		Zfp367
		Sugp2
		Tab1
		Casp8
		Kifc1
		Ube4b
		Nudcd1
		Camk2b
		Hnf1b
		Phf19
		Pctp
		Cox10
		Pfdn2
		Dnttip2
		Sap18b
		Ppil3
		Cnot10
		Pms2
		Tagln2
		Tmed2
		Calm1
		Mrps31
		Pafah1b3
		Haus2
		Eif4e2
		Cd48
		Ppa1
		Ier3ip1
		Wdr75
		Prkab1
		Spg21
		Ap2m1
		3110002H16Rik
		Tmem183a
		Pdhb
		Sln
		E2f3
		Supt16
		Ncbp3
		Ints6
		Nmnat3
		Ndufb8
		Chchd7
		Snx2
		Col4a2
		Mrnip
		Rnf8
		Ttc32
		Polr1d
		Papd5
		Vpreb3
		Xrcc1
		Cfl1
		Carmil1
		Pes1
		Spef1
		Uqcrfs1
		Rpl7
		Rbm45
		Tcerg1
		Psmc2
		Ckap2l
		Trim37
		Tbc1d7
		Ppib
		Snw1
		Dnal4
		Commd2
		Atxn10
		Pik3c3
		Mdh2
		Dtl
		Glce
		Srek1
		Lrr1
		Rcn2
		Prdx2
		Nat10
		Cops6
		Iqck
		Prcc
		Senp6
		Cwc27
		Gm21060
		Ncs1
		Ccdc94
		Tmem186
		Lgr6
		Gle1
		Dvl1
		Prmt1
		Gins3
		1600002K03Rik
		Rsph1
		Grwd1
		Hmcn2
		Cyp51
		Espl1
		Raver1
		Bcl7c
		Rpsa
		Rfk
		Prkrip1
		Map3k20
		Dusp19
		Mrpl42
		Fcna
		Syvn1
		Hsp90b1
		Abraxas1
		Paxip1
		Nnt
		Gar1
		Ptcd3
		Nsmce4a
		Phf5a
		Gk
		Ogdh
		Desi1
		Ldlr
		Igsf8
		Rplp0
		Wee1
		Myl4
		Aipl1
		Rpl39
		Nacc1
		Nabp2
		Tsfm
		Agap3
		Xpo6
		Gm4737
		Rilpl2
		Dhrs4
		Rpap3
		Mrps7
		Polr3e
		Pla2g4c
		Prorsd1
		Naa40
		Tmem177
		Upf3b
		Wdr61
		Utp14b
		Utp4
		Tamm41
		Cnot2
		Wdr31
		Ncf2
		Fignl1
		Ankub1
		2002-09-01
		Tlnrd1
		Pecr
		Rttn
		Irak1bp1
		Brd7
		Larp4
		Skiv2l2
		Ankrd26
		Tmx3
		Dpagt1
		Zfp384
		Hyou1
		Ints12
		Ebp
		Psmb5
		Pam16
		Hgh1
		9130401M01Rik
		Rnf26
		C330027C09Rik
		U2surp
		Dpp8
		Zfp958
		Slc25a13
		Etaa1
		Eif2b4
		Hes6
		Nup35
		Lgmn
		Ccnb1
		Zbtb14
		Aco2
		Hspa4
		Zfp770
		Riok1
		Eloa
		Lyl1
		Cep78
		Rpl8
		Rab23
		Eif3a
		Fam91a1
		Sap130
		Adat2
		Gm20939
		Lmnb1
		Il1f9
		Fam133b
		Aldoa
		Sft2d3
		Lig3
		Pum3
		Psors1c2
		Arfip1
		Snupn
		Aunip
		Imp4
		Tbl1x
		Ash2l
		Pgls
		Hmx2
		Cluap1
		Med17
		Amd2
		Zfp59
		Exog
		Ebna1bp2
		Opn3
		Inip
		Gtf3c3
		Srsf2
		Ktn1
		Ndufaf4
		Timm22
		Ntpcr
		Trim25
		Agpat5
		Dpp9
		9430015G10Rik
		Xpo5
		Rsg1
		Armc9
		Snrnp25
		Cpne9
		Stk16
		Spc24
		Hccs
		Rprd1a
		Ung
		Kdelc1
		Zcchc10
		Atxn3
		Kif18b
		Tdp2
		Fars2
		Rpl36al
		Usp36
		Scyl3
		Meaf6
		Pdlim1
		Ube2v2
		Mxd3
		Urb2
		Bhlhb9
		Dtx2
		Ubl7
		Sec22b
		Csnk2a1
		Pum2
		Mettl1
		Ube2o
		Mzt1
		Tmem70
		Prkd3
		Tssc1
		Exosc7
		Nono
		Stip1
		3110001I22Rik
		Ly9
		Tmem79
		Ldha
		Cul1
		Slc35f2
		Prkcsh
		Kif3a
		Eif4a1
		Napa
		Stt3b
		Agfg2
		Prkaa2
		Isoc2a
		Med30
		Ipp
		Rpl32
		Slc25a28
		Adpgk
		6720489N17Rik
		Smim12
		Cenpt
		Ywhag
		Slamf6
		Zfp131
		Rnf149
		Hsd17b12
		Nif3l1
		Ulbp1
		Smarcd1
		Zfp598
		Sec61a2
		Hpdl
		Ctnnbl1
		Slc25a46
		Oxsr1
		Klhl5
		Tbcd
		Prim1
		Vwa8
		Smad2
		Snapc2
		Igf2bp3
		Raly
		Fam72a
		Mef2d
		Pdzd2
		1810032O08Rik
		Alkbh8
		Slf1
		Ddx20
		Mplkip
		Zc3hav1l
		Erbb3
		Fpr2
		Polr3k
		Tyw5
		Dkc1
		Slc39a11
		Mrpl21
		Gja5
		Hsh2d
		Ccnd3
		Dpf1
		Hacd1
		Hilpda
		Naaladl1
		Gtf2f2
		Ankrd13a
		Hdhd2
		Rtl10
		Btbd1
		Epop
		Kcnab2
		Ndufs5
		Ino80b
		2410002F23Rik
		C330018D20Rik
		Sigmar1
		Parn
		Nudt3
		Saa3
		U2af1
		Mrpl23
		Sgo1
		Azin1
		P4hb
		Fam126a
		Asna1
		Gins1
		Pfkm
		Pitpnb
		Wdr12
		Ormdl1
		Snrpb
		Il6
		Zbtb1
		Spz1
		Cers2
		Ube2f
		Pinlyp
		Kpna3
		Kbtbd6
		Elac2
		Galnt1
		Ufsp2
		Ogfod3
		Eif1a
		Rbm15b
		Urm1
		Stk11
		Rcsd1
		Fxn
		Mtmr14
		Alkbh2
		1700037H04Rik
		Grpel2
		Slx4
		Psmd3
		Txnrd3
		Tra2b
		Nadk2
		Cyb5b
		Cdca4
		Fut8
		Ddx41
		Btbd10
		Bola1
		Hs2st1
		Dbf4
		Dnajc9
		Gorasp2
		Rpl22
		Rpl36a
		Copz1
		Trdmt1
		Wdr89
		Spcs3
		Ube2q2
		Hoxb9
		Ppp1r7
		Hist1h2bj
		Myb
		Pias2
		Bckdk
		Ibtk
		Zfp446
		Chchd4
		Cdc26
		Nsl1
		Mtch2
		Csk
		Pter
		1110008F13Rik
		Ipo7
		Zfp955a
		1810022K09Rik
		Zfp988
		Mavs
		Rev1
		Tceal9
		Rps23
		Erg28
		Tmem241
		Elp2
		Zfp553
		Ppat
		Pgp
		Mmachc
		Cenpq
		Atp5l
		Gm6525
		Mrps21
		Pcna-ps2
		Gm10330
		Kntc1
		Hoxb13
		Mbnl3
		Dgkh
		Telo2
		Wdr43
		Ubl4a
		Mutyh
		H3f3a
		Med21
		B230307C23Rik
		Rps10
		Rfc1
		Ckap5
		Ankrd28
		Rab35
		Fam111a
		Fkbp3
		Rpl18
		Samm50
		Haus1
		Rfc5
		Odf2l
		Lnpk
		Zcchc4
		Zpr1
		Sag
		Htatsf1
		Wdr76
		Stx17
		Ttc33
		Rbm44
		Zkscan1
		Cwc15
		Rsl1d1
		Prpf8
		Rnf2
		Mei4
		Acbd3
		Pafah1b2
		Myo15b
		Gm10053
		Ndufb9
		Gnpda1
		Ints10
		Scn8a
		Nde1
		Slc34a1
		Gcn1l1
		Foxk2
		Prx
		Zadh2
		Osgep
		Rpl6
		Klhdc10
		AI597479
		Sprtn
		Bpnt1
		Pdzd11
		Rad1
		Fbxl14
		Itga10
		Ppp2r2a
		Nufip1
		E2f4
		Pwwp2a
		Btaf1
		Ovca2
		Ly86
		Xrcc2
		Ppih
		Ccdc14
		Zfp106
		Rps3
		Kif5b
		Qars
		Mlh1
		Endog
		Eif3i
		Med6
		Rbmxl1
		Plekha7
		Ttc21b
		Slc20a2
		Papd4
		Vps36
		N4bp2
		Mrpl49
		Gins2
		Prdx1
		Usp1
		Fbxo15
		Wdr18
		Siglecg
		Lamtor5
		Set
		Mpp5
		Hsph1
		Zfp280d
		Dyrk3
		Bzw1
		Mmp3
		Supt3
		Apc
		Osgepl1
		Mrpl15
		Tsr1
		Nt5c3
		Fzr1
		Tm7sf2
		Pycr2
		Cby1
		Arfgef2
		Thap4
		Ivns1abp
		Gstcd
		Bcas2
		Zc3h15
		Nvl
		Pradc1
		Zscan12
		Clpp
		Hdac8
		Osgin2
		AC099934.3
		Tpm4
		Eaf2
		Naa15
		Trib1
		Nup98
		Actl6a
		Rps25
		Diablo
		Fam53a
		Pex11b
		St13
		Ift122
		Gpat4
		Ppan
		Gabpb2
		Cdc37l1
		Cdk5rap1
		Cse1l
		Kctd20
		Cdh17
		Kif2c
		Eef1b2
		Lsm14a
		Cks1b
		Rpgr
		Recql4
		Pou5f1
		Adrm1
		Zfp600
		Dnttip1
		Comtd1
		Cdkl3
		Taf2
		Slc1a5
		Rtkn2
		Zfx
		Fcgr2b
		Rbbp5
		Aplf
		Pcca
		Wdr5
		Lrrc58
		Parvg
		Rnase9
		Tmem60
		Lonp1
		Isg20l2
		Ttk
		Bora
		BC031181
		Ppp1r15b
		Slit1
		Lhx2
		Gm6576
		Hspa2
		Ireb2
		Pspc1
		Nmt2
		Bag1
[truncated: 2,794 more rows]

## Sheet: Phospho up in REL vs WT CHK1i
Names	total	elements
REL vs WT up WT up CHK1i	150	Ahsg_S309;S314
		Smc3_S1067
		Smarcc2_S304;S306
		Hmga1_[S102/S103]
		Map1b_S1260
		Fam129a_S601
		Slc9a1_S697
		Il16_S967
		Flna_S2152
		Smarcc1_S327;S329
		Npm1_S241
		Rabep1_S407;S410
		Hnrnpk_T118
		Pdlim2_S199;[S204/S205]
		Nucb1_S456
		Flna_S2180
		Etv6_S215
		Cbx3_S93;S95
		Eif4g2_T507
		Zcchc8_T474
		Ap3d1_S784
		Hsp90aa1_S231
		Dffa_S314
		Macf1_[S3082/S3085]
		Tfeb_[T330/S331]
		Epsti1_S39
		Pds5b_S1356
		Chd4_S1528
		Kctd12_S178
		Cbx5_S93
		Xrn2_S499;S501
		Cbx3_[S95/S97/S99];S95
		Usp7_S19
		Zyx_S336
		Dok3_S274
		Zc3h14_S515
		Fmnl1_S184
		Prkar2b_S112
		Tns3_S769
		Nsfl1c_S176
		Limch1_S973
		Raver1_S576
		Nfkb1_S940
		Wrnip1_S65
		Trim28_T599;S598;S600
		Cbx3_S95;S97;S99
		Dkc1_S455
		Hcfc1_S2030
		Cfl1_S3
		Fgfr1op_S160
		Fli1_[T35/S39]
		Agfg1_T177;[S179/S181]
		Lcp1_S257
		Eif4g3_[S267/T269]
		Mink1_S729
		Zcchc8_S429
		Fyb1_S561
		Tmem184b_S403
		Hist1h1e_S102
		Rplp0_S307
		Hnrnph1_S104
		Ppp1r12a_S870
		Nav1_S651
		Sept2_S218
		Ikzf1_S440
		Psma3_S250
		Thumpd1_S86;S88
		Yap1_S149
		Cobll1_T899
		Sh3kbp1_[S156/S159]
		Rgs3_S686
		Ranbp3_S283
		Akt1s1_T247
		Fam129a_S595
		Trim28_[S823/S824]
		Tns3_S752
		Treml1_[S228/S229]
		Sash3_S38;S42
		Plekho2_S236
		Ahsg_S138
		Hsp90ab1_S255
		Stab2_S2503
		Evi2b_[S295/S296]
		Sh3kbp1_[S630/S631/S633]
		Hnrnpu_S247
		Plekho2_S395
		Cbx3_S95
		Pea15_S116
		Hsp90ab1_S226
		Rabep2_S180
		Hsp90aa1_S263
		Dbnl_T299
		Myh9_[T1939/S1943]
		Map4k4_S701
		Stk4_S418
		Prpf4b_Y849
		Srrm2_[S1556/S1557]
		Myo18a_S2039
		Ahsg_S309;S312;S314
		Hist1h3a_S29
		Ag2_S210
		Fyb1_S546
		Hist1h1b_[S2/T4]
		Sgta_T82
		Hmga1_S9
		Tnks1bp1_S429
		Dido1_T148;S149;S151
		Ensa_S109
		Cic_S1809
		Ahsg_S312
		Dock2_S1729
		Eef1d_T147;S162
		Ptprc_S964
		Epb41l3_S804
		Dbnl_[S277/T278/T279]
		Eif3b_S75
		P58686_S82
		Hnrnpul1_[Y720/S721]
		Tmpo_S157
		Limch1_S377
		Filip1l_S789
		Tnip1_S448
		Mtss1l_S575
		Cbx1_S89
		Prpf40a_S879;S881;S884
		Eef1d_S162
		Akap2_[S799/T801]
		Akap13_S1892
		Fn1_S2475
		Ostf1_S214
		Thrap3_S935
		Sash3_S7
		Sh3kbp1_S227
		Pdlim2_S120;S143;T138
		Hmga1_S2;S4
		Htatsf1_S441
		Macf1_S4483
		Srrm2_S2052;S2054
		Pcnt_S1437
		Pias1_S503
		Cbx3_S93;S95;S97
		Stk10_S437
		Macf1_S3889
		Cd2ap_S458
		Eif3b_S120;S123
		Srrm2_S2404
		Dock8_[S903/S904/S905]
		Hnrnpa3_S359
		Pogz_S422
		Sh3kbp1_S274
WT up CHK1i	144	Hnrnpu_S58
		Ubxn1_S187;S200
		Cast_S730
		Chaf1a_[S294/S296]
		Iws1_S384
		Ranbp3_S40
		Tcof1_S169;T171
		Lmna_S392
		Gapvd1_T762
		Pnisr_S211
		Slc9a3r1_S297
		Chchd2_S45
		Cep170_S829
		Sash1_S83
		Thrap3_S679
		Cc2d1a_S435
		Srrm2_S349
		Srrm2_S814
		Nucks1_S144;S130
		Rplp1_S104
		Klc4_S590
		Eif4ebp2_T41;T46
		Zc3h4_S92
		Zc3h18_S888
		Sgta_T305
		Cfdp1_T129
		Srrm2_S1339;S1343
		Srrm2_S1380
		Zc3h13_S1090;S1093
		Zc3h18_S847
		Pdlim5_S228
		Eif3g_S42
		Srrm2_S1216;S1209
		Srsf2_S191
		Iws1_S261
		Top2a_S1469;S1470
		Top2a_S1472
		Srrm2_S323
		Efhd2_[S74/S76]
		Cast_S518
		Map4_S1046
		Tp53bp1_S1096
		Hmga1_T53
		Efhd2_S74
		Slc7a6os_S156
		Mki67_[T3059/S3061]
		Nolc1_S238
		Srrm2_S2224
		Iws1_S185
		Lsp1_S63
		Lima1_S488
		Zc3h18_[S530/S532]
		Unc119_S41;S39
		Rcsd1_T256
		Mybbp1a_S1253
		Nucks1_S144
		Hirip3_S153
		Lmnb1_[T21/S24]
		Srrm2_[S1193/S1194]
		Hmga1_S99;S102;S103
		Hist1h1d_T18
		Cenpu_S186
		Tcof1_S456
		Jund_S100
		Fip1l1_S86
		Esf1_S651
		Acin1_S387;S389;S391
		Hirip3_S231;S234;S238
		Eif3g_T41;S42
		Atox1_S44
		Hirip3_S238
		Igf2r_S2401
		Srrm2_S435;[S433/S434]
		Rplp2_S105
		Pds5b_S1166
		Srrm2_[S1229/S1230]
		Gatad2a_S96
		Vim_S459
		Pdap1_S60
		Ccdc94_S309;[S312/S314]
		Tcof1_S499
		Thrap3_S207
		Zbp1_S384
		Rcsd1_[S82/S83]
		Psip1_S272
		Ddx21_S118
		Phf2_S534
		Slco2b1_S21
		Polr2a_T1915;
		Srrm2_[S1475/S1477]
		Bcl9l_T986;S988
		Hirip3_S389
		Pnisr_S290
		Rcsd1_S120;S127;S123
		Nucks1_S58
		Igf2r_S2476
		Tfeb_S108;S113
		Srsf6_S316
		Srrm2_T823
		Rif1_[S1867/S1868]
		Matr3_S195
		Bag6_S1139
		Synpo_S833
		Ensa_S2
		Synpo_S134
		Gpalpp1_S104
		Rcsd1_S120;S127
		Luzp1_S660
		Hemgn_S135
		Set_S183
		Ppp1r18_S234
		Mki67_S1352
		Srrm2_S1339
		Srrm2_[S1535/S1537/S1538];S1535
		Hmga1_T53;S36
		Hemgn_S171;S158;T155
		Srrm2_S454
		Sp1_S7
		Akap12_S1292
		Pds5b_S1281
		Ranbp2_S2505
		Csrp1_S192
		Pym1_S138
		Rcsd1_S105;S108
		Nucks1_S58;S61
		Nolc1_[S370/S371/S372]
		Stip1_S481
		Ncl_S145
		Mki67_S337
		Tcof1_S88
		Zc3h13_S1093
		Rab11fip5_S474
		Srsf4_S401
		Vim_S325
		Apbb1ip_T534
		Pdlim4_[S118/S119]
		Acin1_S380
		Hemgn_S435
		Hemgn_S380
		Zc3h13_S921
		Sorbs2_S358
		Npm1_S4
		Arhgap30_[S875/T876]
		Ap3d1_S760
REL vs WT up	330	Tp53bp1_S268
		Dpf2_T176
		Acaca_S29
		Wdr44_[S3/S5]
		Lbr_S101
		Ranbp2_S2729
		Scaf8_S617
		Cast_S15
		Canx_S553;[T561/S563]
		Q99M08_S19
		Nelfe_S51
		Cavin2_S359;S363
		Fam76b_S193
		Tle3_[T285/S286]
		Ccnk_S325;S329
		Bin1_S298
		Synpo2_S300
		Hdgfl3_S121;S122
		Thumpd1_S8
		Vcl_S290
		Tbc1d5_S565
		Washc2_S388
		Nsun2_S723
		Bmp2k_S908
		Add3_S681
		Arap1_S232
		Rabep1_S410;[S407/T408]
		Syap1_T262
		Ppp6r2_T672
		Slu7_S215
		Cntrob_S63
		Macf1_S3082;S3085
		Tlk1_[S133/S134]
		Alkbh5_[S384/S385]
		Hist1h1a_S2
		Pag1_S247
		Mecp2_S80
		Ablim1_S396
		Set_S30
		Irf3_S135
		Mapk14_Y182
		Pgrmc1_S181
		Nfatc2_S860
		Tagln2_S163
		Cdk11b_S115
		Nes_S688
		Itga4_S1028
		Dek_S306;S308;S311;S312
		Eif2b5_S540
		Anp32b_T265
		Slc9a1_S801
		Pold3_S306
		Ythdc1_S146;T148
		Nelfe_S115
		Pacsin1_S346;[S345/Y347]
		Ing4_S150
		Myc_T58;[S62/S64]
		Irf2bpl_S638
		Myc_[S62/S64]
		Ranbp3_S40;S32;S33
		Hmga1_S102;S103
		Sh3kbp1_S553;S555
		Erbin_S599;S600
		Map1b_S1815
		Eef1d_S133
		Serbp1_[S327/S329]
		Trim28_S601;[T599/S600]
		Ep300_S1037
		Bnip2_S114
		Usp8_S680
		Slc9a1_S790
		Znf185_[S18/S20]
		Thrap3_[S913/T914/S915]
		Snx17_S409
		Acin1_[S838/T840]
		Slc9a3r1_S297;[S283/S285/S286]
		Canx_[T561/S563]
		Foxo1_S284
		Dcaf5_S799
		Ptges3_S113
		Map1b_S1438
		Taf12_S51
		Pa2g4_S2
		Limd1_S413
		Akap12_[S235/T236]
		Pag1_[S348/S351]
		Ppp1r11_S82;T80
		Pi4k2a_S47
		Hnrnpa1_S6
		Nes_S1860;S1861
		Ikzf3_S42
		Snip1_[S89/S91]
		Ms4a1_S29
		Stub1_S20
		Arid3a_S127
		Slc9a3r1_S275
		Tnfrsf13c_T163
		Fkbp15_S1159
		Znf639_S60
		Ncoa3_S847
		Srrm1_S260
		Myo9b_S1175
		Erbin_S869
		Tceal3_S120
		Synpo2_[T219/S220]
		Hdac2_S422;S424
		Bach2_S314
		Srrm2_S1360;[T1370/S1372]
		Lrrfip1_S84
		Sptbn1_S2102
		Rplp1_S101;S104
		Foxo1_S467
		Uba1_S4
		Ubxn1_[S200/S202]
		Rtn4_S16
		Yap1_[S46/T48]
		Clint1_S324
		Dnmt1_S125
		Anp32a_T15
		Ppp1r12a_[S445/Y446]
		Nipbl_S280
		Hist1h1d_[S2/T4]
		Marcks_T143
		Canx_S582
		Myh11_S1954
		Fam103a1_S36
		Znf609_S575;S577
		Hnrnpul2_S191
		Ablim1_S496
		Akap12_T583
		Sh3kbp1_S555
		Arhgef6_S639
		Znf185_[T64/S65]
		Srsf1_S234;S242;S238
		Fnbp1_S299
		Pphln1_S219
		Srrm1_S723;S725;S731;S733
		Sipa1l3_S1538
		Pml_[T513/S514/S515]
		Srsf2_T25
		Lsp1_S243
		Nes_S1837
		Myh9_T1939;S1943
		Srrm2_S2646
		Snrk_S569
		Pphln1_S154
		Npm1_S10
		Ppig_S742;S743;T746
		Ripor2_S582
		Inpp5f_S908
		Bckdk_S31
		Erbin_S849
		Numa1_S398
		Zc3h4_S1270;S1276
		Tnik_S737
		Prkab1_S108
		Sash3_S320;T318
		Abi1_S225
		Srrm1_S723;S725;S731
		E4f1_S166
		Nucks1_T179
		Plekha6_S901
		Sash3_S42
		Ly9_T647
		Elf1_S334
		Dbn1_[S141/S142]
		Pwp1_S49
		Iws1_S345
		Sorbs2_[S381/S382]
		Sptan1_S1029
		Apobr_S484
		Tbc1d5_S578
		Slc9a3r1_[S263/S264]
		Evl_[S243/S244]
		Ptprc_S1229
		Retreg2_T274;S276;S278
		Arhgef6_S679
		Dennd1c_T696
		Nucks1_S19
		Cmtr1_S27
		Ppig_S685
		Irf2bp1_S384
		Kpna3_S60
		Reps1_S561
		Znf609_S575
		Erbin_S1013
		Arid3a_[S77/S78]
		Filip1l_S1047
		Pxn_S83
		Lamtor1_T28
		Vgll4_S58
		Tcf20_S612;S603
		Bcl10_S141
		Pml_[T527/S528]
		Washc2_S613;S614
		Ppp6r1_S531
		Nrbp1_S2
		Washc2_S747
		Eif5_S387;S388
		Rplp0_S304;S307
		Rad9a_S385
		Vcl_S346
		Rabep1_S407
		Atn1_S630
		Rpl22l1_S118
		Lsp1_S273
		Map4k1_S370;[S375/Y379]
		Pdcd4_S94
		Mphosph10_S164;S168
		Arid3a_[S101/S102]
		Api5_S464
		Sash1_S163
		Itsn1_S897
		Aak1_S729
		Son_S1723
		Hnrnpk_S284
		Mcm3_S668
		Lbh_S63
		Cic_S2284
		Pml_S515;[T513/S514]
		Ranbp3_[S58/T60]
		Myc_S164
		Mphosph10_S164;S168;S172
		Atn1_T615
		Ufl1_S458
		Washc2_S1169;S1173;T1174
		Atp2b1_S1155
		Hmgn1_S7
		Htatsf1_S724
		Zc3hc1_S393
		Rps3_T221
		Bach2_S314;T323
		Sptbn1_S2340
		Polr2a_Y1874
		Rere_S656
		Retreg3_S320;S313
		Myh9_S1943
		Ncoa1_S702
		Pdlim2_S204
		Washc2_S723
		Etv6_S22;T18
		Pml_S528
		Cdk13_[S1146/T1147]
		Acin1_S838
		Fkbp15_S1091
		Ncoa3_S720
		Washc2_S614
		Ppp1r11_[T80/S82]
		Tmx1_S245
		Washc2_S533
		Cfl1_T25
		Denr_T69
		Otud4_S1016;S1017
		Ptms_S5
		Evl_S367
		Cbx3_S93
		Znf609_S845;S848;S841
		Ablim1_S475
		Atf7ip_S593
		Strip1_S335
		Cep350_S1641
		Polr2a_S1920
		Sp100_[S314/T316]
		Eif3j1_S14
		Kri1_S142
		Gtf2i_S674
		Pml_S536;S528
		Dpf2_S142
		Ppp1r9b_S99
		Abi1_S183
		Rbm26_S127
		Ranbp3_S40;S33
		Rbl1_S1036
		Wnk1_S185
		Cstf2_S527
		Elf1_S187
		Rabep2_S176;T181
		Hist1h1c_S2
		Trim28_S752
		Nsfl1c_S114
		Epb41l2_S38
		Stk4_S320
		Edc3_S131
		Tpd52l2_S180
		Vasp_S317
		Pram1_S332
		Crtc2_S612
		Prkar1a_S83
		Hdac1_S421;S423
		Pdlim2_S210
		Cdk5rap2_[S479/T481/S485]
		Lsp1_T166;S168
		Wrnip1_S153
		Palld_S901
		Rbm25_S672
		Bin2_S463
		Tsc22d4_S298
		Arhgap1_S51
		Hspb1_S86
		Raver1_S626
		Irf2bp1_S436
		Spag9_S364
		Bank1_S11
		Sp110_S175
		Irf2bpl_S526
		Lcp1_S5
		Bin2_[S391/S392]
		Elac2_S815
		Crtc2_S457
		Akap12_S505
		Eml4_S146
		Glcci1_S293
		Tubb1_S435
		Arhgap27_S462;[S458/S459]
		Tpd52_S223
		Trim28_S51
		Mef2c_S222
		Hist1h1e_S2
		Dennd1b_S632
		Ablim1_S738
		Pou2f2_S55
		Sp100_S190
		Irf2bpl_S636;S638
		Dock2_S1683
		Apobr_S520
		Hmgn3_S6
		Msh6_S63
		Pphln1_S147
		Pml_S17
		Ppp1r12a_Y446

## Sheet: Total up in Rel vs WT CHK1i
Names	total	elements
REL vs WT up total WT vs WT CHK1i up total	343	Rpl18
		Hspa5
		Hgs
		Cox7c
		Cd74
		Hnrnpl
		Tuba1a
		Psmc3
		Rpl9
		Capzb
		Ssr1
		Serpina1b
		Dlat
		Ptgr1
		Nup50
		Blvrb
		Elavl1
		Strap
		Cndp2
		Lmnb2
		Parp1
		Adh5
		Actn4
		Pcna
		Sh3kbp1
		Capza1
		Mcm3
		Rps12
		Hnrnpa3
		Casp8
		Hsp90ab1
		Tcp1
		S100a11
		Anxa6
		Pcmt1
		Etfa
		Rps3
		Psme2
		Kif5b
		Ddx39a
		Ist1
		Coro1a
		Prdx1
		Rps20
		Pcbp2
		Stat1
		Txndc5
		Ppa1
		Lnpep
		Nme1
		Cct2
		Rpl13a
		Pdhb
		Anxa1
		Acadl
		Prps1
		Ppp2r1a
		Fn1
		Cox4i1
		Cr2
		Cfl1
		Uqcrc2
		P01882
		Rwdd1
		Eef1g
		Ppib
		Dynll1
		Mdh2
		Actl6a
		St13
		Pea15
		Capza2
		Ube2k
		Eftud2
		Pdia3
		Cdc37
		2011-09-01
		Cct8
		Psme1
		Ywhae
		Ddx39b
		Ppp1r12c
		Dstn
		Prmt1
		Pa2g4
		Gapdh
		Eif5a
		Tubb4b
		Lta4h
		Nme2
		Ywhaz
		Eef2
		Rpsa
		Elof1
		Gmfb
		Eef1d
		Hsp90b1
		Aif1
		Nudc
		Cap1
		Fgg
		RTRAF
		Tmem109
		Rpl27a
		Glrx3
		Eif2s3x
		Tubb5
		Mdh1
		Rplp0
		F10
		Txndc12
		Hars
		Nedd9
		Col14a1
		Prdx5
		Pebp1
		Vcam1
		Eef1a1
		Atg3
		Arl6ip1
		Arhgdia
		Tuba4a
		Park7
		Ass1
		Gmfg
		Rbbp4
		Psmb1
		Bicd2
		Snu13
		Psmc4
		Ran
		Rpl30
		Icam1
		Puf60
		Rpl28
		Calr
		Ppp2cb
		Prpf19
		Myh9
		Rap1b
		Prdx3
		Serpina1a
		Rpl10a
		Akr1b1
		Aco2
		Taldo1
		Fermt3
		Atic
		Hspa4
		Cd180
		Vtn
		Ms4a1
		Rack1
		Actc1
		Vcp
		Psmd7
		Mthfd1l
		Txndc17
		Pgk1
		Ddb1
		Idh2
		Actb
		Eno1
		Rps27
		Actr2
		Aldoa
		Ola1
		Rpa1
		Mcm4
		Iqgap1
		Acat1
		Tpi1
		Psmc6
		Pgls
		Ufc1
		Eml4
		Kpnb1
		Ahsa1
		Brk1
		Banf1
		Tgm2
		Wdr1
		Pkm
		Rai14
		Cd97
		Mapk1
		Cmpk1
		Eif4a3
		Lrrc47
		Stam
		Uchl3
		Ighm
		Pdia4
		Esd
		Hspa9
		B2m
		Ndufa4
		Cbx1
		Sars
		Shmt2
		Rps4x
		Uqcrc1
		Atp5f1b
		D10Jhu81e
		Snx1
		Arl6ip5
		Snx5
		Psma7
		Cox5b
		Dbnl
		Rps15a
		Msn
		Ikzf1
		Psmd1
		Anp32b
		Arpc4
		Pfn1
		Vdac1
		Snrnp40
		Nono
		Ahcy
		Ldha
		Flna
		H2-K1
		Sptbn1
		Smc3
		Eloc
		Hspd1
		Cacybp
		Ripor2
		H2-Aa
		Tomm22
		Phgdh
		Rpl22l1
		Sgta
		Cct5
		Pdia6
		Ppp3ca
		Ddx1
		Gstm1
		Ywhag
		Coro1b
		Rac2
		Glg1
		Serpina1e
		Itgb2
		Samhd1
		Nap1l1
		Atp5f1a
		Thumpd1
		Sypl1
		Rps13
		Ctsd
		Pzp
		Gsn
		Cox6b1
		Mug1
		Anxa5
		Rtn3
		Gdi2
		Tmod3
		Gimap4
		Cd79b
		Abi1
		Ndufs1
		M6pr
		Serpina3k
		Cbx3
		Dynll2
		Cbx5
		Dpysl2
		U2af1
		Supt5h
		Sf3b3
		Slc44a2
		Csde1
		P4hb
		Sssca1
		Hspa8
		Itga1
		Reep5
		Serpina1d
		Tln1
		Pbdc1
		Cct7
		Ppm1g
		Rbm8a
		Rpl34
		Hsp90aa1
		Trim28
		Cat
		Vat1
		Arpc2
		Gspt1
		S100a4
		Ncstn
		Ruvbl1
		Lgals3
		Psmd3
		Actr3
		Vcl
		Tufm
		Rps18
		Gns
		Arhgdib
		Mat2a
		Aars
		Rpl11
		Ywhaq
		Tnfaip8
		Sf3b4
		Clic1
		Pak2
		Cltc
		Actbl2
		Ywhab
		Rpl12
		Lcp1
		Fh
		Usp5
		Txnl1
		Cd79a
		Ube2n
		Nsfl1c
		Ptk2b
		Aldh2
		Ptprc
		Ywhah
		Sec31a
		Psmc1
		Cotl1
		Arpc3
		Ctsb
		Vwf
		Tagln
		Trap1
		Actn1
		Pcbp1
		Rhoa
		Ap1b1
		Pyhin1
		Mtpn
		Sptan1
WT vs WT CHK1i up total	121	Golga3
		Zpr1
		Mcam
		Pkia
		Tmed10
		Gabpa
		Ppia
		Rps6
		Mybbp1a
		Mapt
		Abce1
		Stom
		Sod3
		Plac9
		Bcap31
		Mllt10
		Lrp1
		S100a6
		Hsph1
		Gpkow
		Srsf6
		Bcas2
		Cd19
		Nop2
		Dnajc7
		Tfe3
		Macf1
		Safb
		Ddx5
		Reps1
		Ckb
		Plekho2
		Rabep1
		Prpf40a
		Hells
		Man2b1
		Eif3b
		Rbm25
		Npc2
		Ifitm3
		Cisd2
		Hnrnpa2b1
		Sh3bgrl
		Mical1
		Lmbrd1
		Nup93
		Akr1a1
		Ufm1
		Lmnb1
		Zbp1
		Smarcc2
		Zyx
		Ilf3
		Fkbp10
		Rabep2
		Clic4
		Timm10
		Sdf2l1
		Lamp2
		H2-D1
		Gga3
		Hnrnpa0
		Fkbp7
		Crcp
		Stip1
		Ranbp2
		Eif3g
		Grcc10
		Arhgap30
		Zcchc8
		Prkcsh
		Fga
		Ctsl
		Lgals3bp
		Usp9x
		Timm9
		Ptbp1
		Timm13
		Anxa2
		Grn
		Apoh
		Polr2d
		Mef2d
		Dohh
		Stx7
		Inppl1
		Med29
		U2af2
		Rab1A
		Rbm17
		Mtrex
		Ndufv2
		Hnrnpa1
		Plec
		Ranbp3
		Ctdp1
		Cav1
		Bag6
		Dbn1
		Fyb1
		Psap
		Gnai2
		Cdc5l
		Srrt
		Ubxn7
		Ssrp1
		Usp14
		Fabp5
		Des
		Rnase1
		Kpna4
		Lmna
		Ppp1r7
		Sparc
		Eif3d
		Fkbp1a
		Lamp1
		Lima1
		Sp1
		Aip
		Siglec1
REL vs WT up total	281	Serpinb1a
		Selenbp1
		Med10
		Sugt1
		Dhx9
		Tpt1
		Ruvbl2
		Ssu72
		Cand1
		Cnn2
		Luc7l2
		Htatsf1
		Psma4
		Plin3
		Rangap1
		Rprd1b
		Otub1
		Cct3
		Tardbp
		Pafah1b2
		Arcn1
		Ifi30
		Psmd11
		Glo1
		Polr2j
		Snrpe
		Capg
		Eif3i
		Camp
		Pip4k2a
		Serpinb6
		Bcl10
		Tagln2
		Urod
		Egfr
		Rnh1
		Limd2
		Mmrn1
		Bzw1
		Alb
		Acsf2
		Snx2
		Itgb1
		Rps5
		Polr1d
		Cbfb
		Sncg
		Apex1
		Arf3
		Mecp2
		Rtn4
		Ctsh
		Cse1l
		Apoc1
		Erp29
		Ppp1r12a
		Prdx2
		Stx8
		Dcps
		Gpi
		Aimp1
		C3
		Fam49b
		Eif3h
		Bag1
		Psmd2
		Ptpn6
		Dync1i2
		Vars
		Treml1
		Pacsin1
		Myl9
		Bag2
		Anp32e
		Rpl21
		Sucla2
		Myl4
		Eif2s1
		Ndufb3
		Swap70
		Serpina6
		Pml
		Wtap
		Ndufs8
		Ces1c
		Cct6a
		Dnajb11
		Pdlim2
		Apool
		S100a8
		Prorsd1
		Uba2
		Retnlg
		Pdcd6ip
		Pf4
		Jakmip1
		Arhgap1
		Napg
		Pgd
		Vapb
		Dars
		Hrg
		Rtn1
		Bub3
		Mycbp
		S100a9
		Twf2
		Prkar1a
		Vsir
		Lgmn
		Sf3a3
		Ftl1
		Rbbp7
		Fkbp2
		Acaa2
		Rcc2
		Ppid
		Phb
		Abi3
		Wfdc21
		Psma1
		Rpl18a
		Cct4
		H2afz
		Gpatch11
		Dlgap4
		Myl12b
		H2-DMa
		Paf1
		Glud1
		Cs
		Commd8
		Thbs1
		Hpcal1
		Ap2b1
		Grb2
		Fasn
		Etfb
		Rsu1
		Ltf
		Ostf1
		Ifi35
		Ctsz
		Bcam
		S100a10
		Tomm34
		Ggt5
		Abracl
		Got2
		Atp5i
		Emb
		Tpd52
		Lcn2
		Dffa
		Fgfr1op2
		Idh1
		Gng11
		Me2
		Apoa1
		Usp15
		Pld3
		Sae1
		Actg1
		Cope
		Rps9
		Gosr2
		Dctn2
		Rrp1
		Ilf2
		Rps14
		Rexo2
		Gid8
		Ptges3
		Selenoh
		Cnp
		Lum
		Pgam1
		Hexb
		Eif4a1
		Gmps
		Ppif
		Mcm7
		Mif
		Sri
		Pitpna
		Uchl5
		Uba1
		Kars
		Bpgm
		Plbd2
		Setd7
		Snx12
		Babam1
		Rps16
		Glod4
		Myl6b
		Dync1h1
		Gm2a
		Ca2
		Ece1
		Enpp4
		Rps27l
		Ezr
		Eif3f
		Aldh9a1
		Eif6
		Eif5
		Arpc5
		Coro7
		Mthfd1
		Prdx6
		Psmb10
		Ada
		Igkc
		Ube2v1
		Rpl35a
		Camk2d
		Sp100
		Serpinc1
		Pygb
		Apoa2
		Fabp4
		Psma5
		Api5
		Psmb8
		Chmp2a
		Psmd13
		H2afy
		Ly6d
		Rrm1
		Rps26
		Vapa
		Ngp
		Hdgfl3
		Myh11
		Gsto1
		Asrgl1
		Mcm5
		Kpna3
		Copb1
		Erp44
		Hspa1b
		Ctsc
		Pycard
		Psmb2
		Sdha
		Tra2b
		Nap1l4
		Rpl35
		Cnn3
		Hook3
		Eci1
		Dnajc9
		Psma6
		Hnrnpf
		Eif3l
		Luc7l3
		Dek
		Myl6
		Acp1
		Copb2
		Pafah1b1
		Bgn
		Csk
		Ide
		Eif3k
		Phpt1
		Lyz2
		Pdxk
		Map2k1
		Traf3ip3
		Ganab
		Rps23
		Apoc3
		Arpc1b
		Atp5l
		Kctd12
		Eif4e
		Adk
		Tubb2a
		Rps10
