# Supplementary material for: Regulation of CHK1 inhibitor resistance by a c-Rel and USP1 dependent pathway
Source: Biochem J. 2022 Oct 14;479(19):2063–86. doi: 10.1042/BCJ20220102 (PMC9704646; doi:10.1042/BCJ20220102)
Supplement: Supplementary Material 7 [file BCJ-479-2063-s7.pdf]

## Sheet: Description
Supp Data File 6 RNASeq_counts_tximport_EuMyc.csv
Data for all genes and samples from RNA Seq analysis of reimplanted Eμ-Myc lymphoma cells

## Sheet: Samples
Sample number	Lymphoma number	Mouse genotype	Description
1	1A	WT	RNA extracted from lymph nodes of wild type Eu-Myc mouse lymphoma. No CHK1 inhibitor (CCT244747) treatment
2	1B	WT
3	1C	WT
4	1D	WT	RNA extracted from lymph nodes of wild type Eu-Myc mouse lymphoma. Mice treated with CHK1 inhibitor (CCT244747) for 8 hours
5	1E	WT
6	1F	WT
7	3A	T505A	RNA extracted from lymph nodes of RelAT505A Eu-Myc mouse lymphoma. No CHK1 inhibitor (CCT244747) treatment
8	3B	T505A
9	3C	T505A
10	3D	T505A	RNA extracted from lymph nodes of RelAT505A Eu-Myc mouse lymphoma. Mice treated with CHK1 inhibitor (CCT244747) for 8 hours
11	3E	T505A
12	3F	T505A
13	5A	cREL	RNA extracted from lymph nodes of c-Rel -/- Eu-Myc mouse lymphoma. No CHK1 inhibitor (CCT244747) treatment
14	5B	cREL
15	5C	cREL
16	5E	cREL	RNA extracted from lymph nodes of c-Rel -/- Eu-Myc mouse lymphoma. Mice treated with CHK1 inhibitor (CCT244747) for 8 hours
17	5F	cREL
18	2A	WT	RNA extracted from lymph nodes of wild type Eu-Myc mouse lymphoma. No CHK1 inhibitor (CCT244747) treatment
19	2B	WT
20	2C	WT
21	2D	WT	RNA extracted from lymph nodes of wild type Eu-Myc mouse lymphoma. Mice treated with CHK1 inhibitor (CCT244747) for 8 hours
22	2E	WT
23	2F	WT
24	4B	T505A	RNA extracted from lymph nodes of RelAT505A Eu-Myc mouse lymphoma. No CHK1 inhibitor (CCT244747) treatment
25	4C	T505A
26	4D	T505A
27	4E	T505A	RNA extracted from lymph nodes of RelAT505A Eu-Myc mouse lymphoma. Mice treated with CHK1 inhibitor (CCT244747) for 8 hours
28	4F	T505A
29	6A	cREL	RNA extracted from lymph nodes of c-Rel -/- Eu-Myc mouse lymphoma. No CHK1 inhibitor (CCT244747) treatment
30	6B	cREL
31	6C	cREL
32	6D	cREL	RNA extracted from lymph nodes of c-Rel -/- Eu-Myc mouse lymphoma. Mice treated with CHK1 inhibitor (CCT244747) for 8 hours
33	7A	cREL

## Sheet: counts_tximport
	28_4F_T505A	11_3E_T505A	4_1D_WT	31_6C_cREL	14_5B_cREL	29_6A_cREL	24_4B_T505A	12_3F_T505A	13_5A_cREL	9_3C_T505A	6_1F_WT	23_2F_WT	18_2A_WT	27_4E_T505A	3_1C_WT	5_1E_WT	22_2E_WT	17_5F_cREL	21_2D_WT	16_5E_cREL	20_2C_WT	15_5C_cREL	7_3A_T505A	32_6D_cREL	26_4D_T505A	33_7A_cREL	1_1A_WT	8_3B_T505A	30_6B_cREL	25_4C_T505A	19_2B_WT	10_3D_T505A	2_1B_WT
ENSMUSG00000000001	2039.31	1506.88	1356.5	1854.32	1731.62	2017	2216.41	1575.35	1652.46	1269.53	1661.64	2549.14	2404.81	2071.15	1605.86	1686.54	2328.27	2470.2	2139.76	2090.57	2210.46	1985.19	1705.37	1853.2	2068.16	2257.31	1738.85	1851.68	1977.11	2071.02	2013.85	1439.76	1745.1
ENSMUSG00000000003	0	0	0	0	0	0	0	0	0	0	0	0	0	0	0	0	0	0	0	0	0	0	0	0	0	0	0	0	0	0	0	0	0
ENSMUSG00000000028	641.704	674.267	517.621	96.5826	219.643	359.817	704.035	630.262	443.542	613.309	647.06	882.154	1030.94	708.007	848.985	592.553	796.408	108.886	906.76	438.991	934.438	330.141	715.73	181.999	598.397	405.351	886.117	780.783	165.332	791.392	900.183	855.366	822.146
ENSMUSG00000000031	15.5291	8.08562	6.7088	14.2111	7.6124	3.52239	11.4461	16.0814	1.87841	9.1231	4.79255	7.94196	5.41123	19.7591	15.946	5.36212	11.3204	5.49398	17.3791	3.10378	7.33755	7.24851	16.585	7.254	1.51856	17.1854	5.32759	3.8237	3.3822	11.3407	6.71104	3.65669	5.37097
ENSMUSG00000000037	2.61674	0	1.04184	2.63834	4.46023	1.7465	8.78597	8.34501	2.56874	0.828118	2.2218	8.84873	0	1.57736	8.78029	0.892717	8.63685	3.96802	8.05854	4.41741	0	3.6749	0.872915	7.9248	0.864518	3.04805	8.94879	1.01689	5.14443	0.865722	1.76014	0.833455	0.89324
ENSMUSG00000000049	0	0	0	0	0	0	0	0	0	0	0	0	0	0	0	0	0	1.01031	0	0	0	0	0	0	0	0	0	0	0	0	0	0	0
ENSMUSG00000000056	329.601	515.366	274.299	596.161	357.656	526.953	290.893	387.744	201.389	250.72	244.849	409.46	396.604	351.239	262.436	309.805	334.089	892.67	300.081	267.244	593.125	469.274	379.959	619.712	401.698	306.568	375.871	344.823	573.819	407.69	396.21	468.942	579.96
ENSMUSG00000000058	143.122	95.1026	137.828	519.39	445.699	321.432	153.203	96.3337	242.842	161.626	143.368	185.33	143.659	169.7	215.593	176.684	151.351	745.68	271.82	237.939	250.991	304.366	176.222	180.727	116.123	568.39	164.422	148.544	249.548	87.7894	160.351	138.126	167.278
ENSMUSG00000000078	394.198	401.105	400.23	1602.91	1484.29	1218.59	585.588	738.039	1213.95	501.156	471.045	677.704	420.328	566.578	323.662	505.09	524.031	1992.72	559.05	1559.44	350.621	1445.95	286.956	1738.45	640.755	1463.46	445.77	435.16	1842.78	483.961	330.48	542.997	419.211
ENSMUSG00000000085	293.951	266.124	270.685	282.062	277.612	435.425	284.481	332.499	345.448	185.338	273.702	515.099	397.006	304.194	380.782	322.168	298.341	379.175	448.779	423.625	449.933	410.257	366.154	351.661	375.077	344.73	368.587	343.995	357.032	356.905	337.453	399.565	346.552
ENSMUSG00000000088	1846.45	1451.43	1552.59	837.941	1174.69	1258.2	1796.67	1486.95	1579.07	2156.43	1618.52	2486.27	2150.08	1879.95	2301.51	1790.98	2465.1	1176.46	2321.34	1811.31	2175.8	1353.09	1537.61	1026.91	1752.24	1266.94	1944.31	1582.86	926.362	1689.57	1679.61	1667.98	1817.26
ENSMUSG00000000093	8.87516	17.1779	13.1112	31.8168	41.349	21.72	17.8663	17.9124	34.8499	11.2349	18.9276	15.9946	14.0047	28.5336	9.18217	21.1952	9.03203	8.0825	13.0657	31.9627	23.9941	40.5342	16.7773	14.8256	25.4121	20.6551	15.1645	9.84412	16.9324	12.7236	19.8997	19.7873	13.1286
ENSMUSG00000000094	0	0	0	0	1.00853	0	0	0	0	0	0	0	0	0	0	0	0	0	0	0	0	0	0	0	0	0	0	0	0	0	0	0	0
ENSMUSG00000000103	0	0	0	0	0	0	0	0	0	0	0	0	0	0	0	0	0	0	0	0	0	0	0	0	0	0	0	0	0	0	0	0	0
ENSMUSG00000000120	46.348	42.9448	57.4876	174.677	158.037	193.162	99.2572	40.5386	194.581	18.7247	82.6838	80.978	46.0155	36.4049	38.7691	70.6509	84.2994	145.498	86.4345	162.236	60.9851	207.614	52.306	300.465	18.5704	213.746	57.6249	51.1894	179.284	27.4048	47.7593	79.1492	85.841
ENSMUSG00000000125	0	0	0	8.9485	4.03408	0	0	0	1.93613	0.936274	0	0	0	0	0	0	0	9.09278	1.00508	2.9965	0	4.94318	0	6.9186	0	4.91788	1.01096	0	2.98804	0	0	0.942264	1.00993
ENSMUSG00000000126	2.95835	2.86298	4.03421	6.95995	8.06809	3.94908	4.96286	2.82826	3.87222	0.936197	1.9924	2.999	1.00033	3.93565	0	2.01862	7.02497	10.1031	8.04045	8.98955	0.999726	8.89776	2.96074	7.90696	0.977436	8.85216	2.0219	4.92207	9.96025	0	2.98494	4.71127	3.02972
ENSMUSG00000000127	27.2098	14.3886	31.3626	81.5128	79.829	54.2641	47.9039	27.5621	69.8102	12.3635	37.0522	40.5062	41.0063	66.587	21.1507	32.7569	52.0125	109.413	54.7146	64.1245	43.4656	68.0479	29.1187	79.3014	23.8987	86.651	31.5144	21.8374	76.1779	53.7398	30.9407	23.7807	34.2593
ENSMUSG00000000131	2628.94	2379.05	2002.31	2114.74	2250.21	2566.07	2426.56	2465.32	2326.93	1201.91	2244.93	2722.57	2590.53	2597	1815.44	2258.71	2459.62	1946.47	2418.49	2379.49	2564.45	2460.62	2669.53	1885.18	2674.07	2449.96	2139.33	2497.94	2343.82	2446.93	2327.86	2564.47	2213.58
ENSMUSG00000000134	299.155	280.994	361.328	701.419	660.629	531.212	574.887	374.242	541.057	153.238	262.235	363.726	325.436	194.372	147.24	338.242	397.783	887.278	371.631	590.232	390.456	741.69	397.551	574.778	343.381	473.595	222.428	267.152	660.442	236.594	133.407	378.746	252.673
ENSMUSG00000000142	3.557	43.4124	45.5817	448.975	291.426	209.312	55.27	19.5171	188.345	16.3023	60.9079	40.7078	22.5342	20.5841	21.3084	49.9799	30.8487	344.81	43.9306	216.383	22.1598	333.805	27.7857	330.113	11.2814	180.592	29.3876	84.861	378.823	8.47281	78.5069	36.192	39.9636
ENSMUSG00000000148	533.965	470.732	396.158	467.108	559.815	521.207	451.782	434.297	561.14	208.835	502.9	564.512	454.361	505.009	436.533	454.95	464.31	458.223	421.893	548.23	501.3	603.763	442.908	395.084	367.605	524.259	433.105	476.61	474.455	460.241	447.605	484.899	501.397
ENSMUSG00000000149	980.333	737.683	615.316	1015.92	968.735	908.375	1058.27	748.947	911.711	516.663	710.052	1023.58	806.824	953.852	703.998	742.312	887.695	1117.08	882.066	1016.63	890.244	1035.53	818.751	818.64	902.271	1028.29	818.388	844.031	1051.13	932.188	732.767	753.758	664.986
ENSMUSG00000000154	5.28774	3.41148	2.0284	20.4371	20.504	14.117	5.32229	0.948023	6.92107	2.51008	6.01057	9.44645	5.02966	2.96825	3.07783	5.41196	7.06425	25.2811	4.04271	15.175	5.36081	8.83533	5.50771	20.6615	3.93142	7.91108	2.03323	1.83128	19.5507	1.96843	5.55282	4.73763	5.07773
ENSMUSG00000000157	1.6277	0	0.832353	2.46175	15.9735	3.25922	0	1.41922	1.59785	0	5.3406	0	0	1.62409	0.842028	0.759688	5.38013	1.66764	0	1.64866	0	2.3944	0.814517	10.7458	2.41995	14.5931	0	0	3.28809	1.61552	0.821165	0.777623	0.833484
ENSMUSG00000000159	0	0	0	0.994278	0	0	0	0	0	0	0	0	0	0	0	0	0	0	0	0	0	0	0	0	0	0	0	0	0.99602	0	0	0	0
ENSMUSG00000000167	13.1347	8.30455	4.38822	4.33628	4.51603	5.20997	5.80942	6.59364	7.5958	4.40771	6.25328	17.1084	8.70493	8.57854	9.76041	7.4196	10.2368	13.3743	13.9905	17.759	6.9599	6.77962	5.42062	10.7927	1.24161	5.95501	12.6397	13.0433	8.39546	7.42072	11.6905	20.2417	13.9007
ENSMUSG00000000168	941.34	692.25	660.895	473.572	586.909	662.71	864.114	841.177	717.195	539.862	844.341	1027.96	1036.38	915.846	694.855	848.616	862.818	699.253	980.481	825.352	974.458	607.067	718.775	420.505	865.028	933.238	1002.62	741.909	430.866	763.147	864.359	841.644	860.137
ENSMUSG00000000171	2951.48	2353.37	2309.59	1018.14	1598.49	1723.78	2541.98	2663.29	2060.01	4455.54	2599.06	3574.8	4021.35	3221.35	3367.81	2837.14	3880.78	1279.05	3850.35	2509.08	3866.05	1981.23	2317.25	1107.96	2838.34	2042.89	3297.76	2503.36	1154.39	2989.08	3228.73	2549.73	2861.03
ENSMUSG00000000182	18.7364	3.81733	13.1112	0.99426	0	0.987287	2.97771	44.3096	0.968051	9.36237	15.939	26.9909	33.0111	60.019	29.587	6.05581	29.1034	2.02063	15.0758	9.98836	30.9924	0	2.9607	7.90697	218.935	0	20.2192	13.7817	0.996016	73.4057	16.9147	13.1915	36.3562
ENSMUSG00000000183	0	0	0	0	1.00853	0	0	0	0	0	0	0	0	0	0	0	0	0	0	0	0	0.988645	0	0	0	0	0	0	0	0	0	0	0
ENSMUSG00000000184	473.529	73.7007	781.446	3829.56	2754.39	3268.91	910.875	850.713	2515.7	261.96	932.764	1621.7	1353.62	504.516	305.58	206.596	1388.99	4127.83	954.796	3771.84	498.7	4385.58	490.224	4452.41	135.043	4070.43	461.525	705.329	4912.73	183.067	734.418	134.63	982.296
ENSMUSG00000000194	709.552	512.64	394.729	741.926	829.635	773.994	742.397	554.702	738.06	344.852	286.654	590.729	582.254	619.654	310.637	384.686	486.152	962.342	864.28	670.381	507.904	889.849	410.344	718.225	728.305	820.441	600.219	598.048	661.373	376.828	685.823	663.284	448.806
ENSMUSG00000000197	1.13294	0	0	1.16166	0.609085	0	1.15961	1.60001	0.584712	0	0.60164	0.603712	0	1.14956	1.99438	0	0	1.1804	1.17419	0.60325	0	2.01148	0	1.15475	0	1.18809	0	2.26763	0	0	0	0	0
ENSMUSG00000000202	0	0	0.402467	0.396768	0	0	0	0	1.62026	0	0	0	0	0	0	0	0	0	0	8.22991	0	0	0	0	0	0	0	0	1.80086	0	0	0	0
ENSMUSG00000000204	48.1967	10.4279	67.2072	33.9643	21.1805	84.4633	179.12	62.8763	55.2658	70.849	88.7694	90.654	84.6201	47.414	84.8019	119.174	44.993	99.3853	138.603	61.5774	77.7481	54.4575	46.7066	431.679	381.159	68.0556	76.1373	29.5715	40.0636	46.9393	59.2877	118.791	90.5899
ENSMUSG00000000214	0	0	0	0	0	0	0	0	0	0	0	0	0	0	0	0	0	0	0	0	0	0	0	0	0	0	0	0	0	0	0	0	0
ENSMUSG00000000215	0	0	0	0.994295	0	0	0	0	0	0	0	0	0	0	0	0	0	0	0	0	0	0	0	0	0	0	0	0	0	0	0	0	0
ENSMUSG00000000216	0	0	0	0	2.01701	0	0	0	0.96802	0	0	0	0	0	0	0	0	0	0	0	0	0	0	0	0	0	0	0	0.996013	0	0	0	0
ENSMUSG00000000223	20.5908	23.5821	22.9973	12.5663	10.3564	25.787	24.4945	25.8993	28.8196	10.3306	25.5773	16.8248	10.2725	37.4371	15.5803	25.5718	15.7883	28.9349	14.2905	25.8748	34.1839	13.4856	18.503	16.0618	27.6845	26.0166	25.0359	28.7763	18.973	19.549	34.4587	32.7296	27.3679
ENSMUSG00000000244	886.948	799.289	506.332	1289.01	1417.37	887.175	769.748	604.755	1163.37	571.004	646.867	761.939	538.734	847.791	528.941	562.131	638.853	1395.37	629.061	1064.48	635.326	1376.38	693.888	793.496	620.279	981.893	561.729	566.571	1149.94	731.453	586.017	735.768	671.621
ENSMUSG00000000247	91.3597	100.672	42.9405	2.44594	15.7387	19.2902	102.289	45.1003	4.38243	55.9231	24.6472	17.9812	39.1964	75.3224	14.055	17.5564	18.1295	9.69284	5.93391	3.93147	30.0627	29.3207	65.3007	9.3775	102.231	33.4647	50.7825	89.5205	3.92039	155.138	9.17018	115.016	7.45312
ENSMUSG00000000248	0.555221	0	3.40857	2.23917	9.49248	0	3.35303	1.59309	5.06957	0.527095	0	1.68849	1.68963	0	0	0	0.565042	12.8547	7.77445	0.562364	10.1933	7.64748	0	3.8953	11.0659	4.23642	8.6158	4.99049	12.5884	3.28966	0.560193	2.3818	1.13717
ENSMUSG00000000253	70.7949	33.0184	13.2931	68.0894	44.0318	27.652	55.2314	34.7323	37.7731	59.364	20.1066	30.4586	28.5185	47.6958	34.1539	29.5464	26.114	80.1491	43.7786	32.9127	17.295	70.7917	28.6108	66.0925	49.8645	51.7978	18.3217	39.7358	49.9723	41.2068	22.7518	37.2578	23.2939
ENSMUSG00000000263	0	0	0	0	0	0	0	0	0	0	0	0	0	0	0	0	0	0	0	0	0	0	0	0	0	0	0	0	0	0	0	0	0
ENSMUSG00000000266	56.8299	35.4821	55.6031	158.96	128.988	150.123	86.1999	60.4646	88.4923	27.5197	52.1362	77.123	53.6996	148.382	36.8665	93.0656	70.2791	183.906	67.2625	105.384	54.4839	113.949	54.1226	122.318	58.1434	191.862	49.8038	56.7914	151.897	49.1264	48.0096	94.3822	46.2583
ENSMUSG00000000275	3587.27	3294.46	2904.29	1917.82	1858.01	2996.38	3439.02	3943.64	2599.32	2094.35	3488.89	4464.77	3787.14	3858.97	2663.36	3508.35	3712.26	2879.7	3606.29	3351.56	3680.72	2643.7	3356.54	2452.51	4067.68	2837.97	3024.6	3298.07	1989.44	3545.31	3283.82	4497.82	3431.02
ENSMUSG00000000276	680.058	482.23	507.85	394.189	538.286	510.199	562.468	675.377	553.678	439.447	569.673	748.366	795.922	728.214	526.153	705.642	723.595	382.671	626.188	541.095	675.09	569.206	522.469	357.202	844.089	709.618	590.133	565.703	394.68	734.578	702.934	454.777	534.467
ENSMUSG00000000278	970.35	968.642	711.03	1056.91	1086.17	854.981	980.661	1168.08	1050.34	1019.56	796.952	977.671	975.328	852.073	838.638	846.801	984.497	1458.89	978.921	1207.59	990.757	1077.62	881.306	1052.62	1126.93	1085.87	864.373	930.269	1287.86	831.932	838.772	1208.91	886.688
ENSMUSG00000000282	794.058	910.131	501.445	463.559	629.059	812.241	661.828	683.746	690.712	346.251	734.302	701.05	655.959	612.996	512.335	523.444	451.569	616.728	526.739	663.425	434.579	893.456	679.169	454.866	1069.6	765.973	611.043	657.415	523.38	570.86	550.205	730.037	574.895
ENSMUSG00000000290	1325.96	950.294	1005.88	3457.16	2447.13	3178.82	1656.89	992.297	2506.37	599.41	1191.67	1728.86	1227.3	1007.36	831.594	1310.82	1071.81	3186.25	1220.56	2055.41	1254.24	2925.12	909.316	2944.96	1314.26	3152	1063.25	1051.06	4169.68	1221.27	1052.54	1189.22	1384.95
ENSMUSG00000000295	213.742	197.832	327.042	153.686	234.702	225.807	223.756	214.964	264.998	464.551	291.546	391.959	455.746	238.186	410.969	305.039	484.436	133.597	405.844	275.366	444.69	264.632	212.009	120.452	275.485	236.501	330.502	196.038	187.858	232.78	366.474	210.343	307.515
ENSMUSG00000000296	0	0	0	3.16499	2.37163	1.16084	0	0.750242	0	0	0	2.35083	0	1.15689	0.811914	1.6064	0	1.18793	1.18174	0.794884	2.35104	1.16246	0.785376	0	1.14923	5.78246	0	0.783389	1.17113	0	0	0	0
ENSMUSG00000000301	68.9291	48.0756	28.8366	15.2567	12.4084	26.5296	38.7241	45.8571	49.5205	66.8362	40.6665	26.5436	47.3716	57.1063	60.3253	34.2518	45.5682	17.0133	22.6598	39.929	69.0386	12.4465	41.0118	13.5791	44.1916	36.561	54.7917	42.4157	20.0784	61.8415	62.6479	59.4273	34.2081
ENSMUSG00000000303	5.86419	2.83749	13.9941	41.3882	86.9604	28.3764	7.86994	5.60622	34.5399	5.56742	9.87327	16.8431	3.96574	13.6523	15.1675	10.0032	6.96246	61.0808	7.96885	36.6283	11.8904	44.0931	5.86882	46.0404	16.4678	32.1693	9.01773	6.90454	39.4867	5.82024	6.9029	14.0081	14.0128
ENSMUSG00000000305	5.45819	10.5644	12.0951	39.4404	32.5624	38.252	26.5538	11.3061	35.721	37.8996	18.3797	11.9884	9.22808	17.2457	8.47059	11.1729	13.8868	40.0764	7.41728	40.5428	13.8342	57.7337	10.925	38.2945	31.06	49.9042	7.46093	31.283	54.2112	8.12604	16.5217	15.6462	11.1795
ENSMUSG00000000308	0	0	1.00855	0	0	0	0	0	0	0	0	0	0	0	0	0	0	0	0	0	0	0	0	0	0	0	0	0	0	0	0	0	0
ENSMUSG00000000317	42.1206	56.6777	70.0635	78.1943	97.9169	175.335	68.3525	48.486	143.007	26.1156	42.5504	57.5126	60.1673	200.765	54.2497	51.0284	53.3629	168.102	65.8771	95.775	67.1041	81.8703	65.3813	147.812	55.2225	120.435	114.425	69.6392	75.4705	63.7984	51.1721	69.8153	73.0666
ENSMUSG00000000318	104.139	87.264	49.8058	687.633	415.11	304.468	64.6449	88.8572	260.917	103.6	77.3137	99.6483	28.853	167.512	65.862	101.084	108.43	865.249	113.865	507.027	75.5639	430.77	99.9959	487.153	90.5946	618.788	51.2786	40.8374	472.785	44.2334	76.7744	132.051	46.6834
ENSMUSG00000000320	6.07828	2.14549	5.17057	21.8579	12.1447	7.56544	15.3772	3.63444	10.6823	0.902365	4.9741	8.42496	9.15848	2.84485	2.9499	4.86372	5.80332	7.78976	4.31279	9.62665	6.74487	12.3186	7.10071	14.7106	5.65197	20.5387	1.95354	3.79506	10.3233	6.60312	5.75371	4.54172	12.3888
ENSMUSG00000000325	287.918	216.64	130.074	103.542	106.5	91.8827	76.8125	238.5	77.6825	136.457	121.697	123.165	163.253	222.404	220.75	202.323	85.2734	94.0892	93.9301	124.585	156.64	90.9325	227.737	57.5766	320.886	113.942	192.616	204.162	131.143	282.319	160.02	239.368	147.24
ENSMUSG00000000326	636.978	543.561	559.801	750.059	731.944	646.125	625.109	552.867	751.863	568.949	501.745	613.942	586.602	655.967	515.841	592.1	683.184	1058.11	672.065	732.812	577.051	747.833	539.452	658.321	655.964	940.519	538.938	554.64	716.263	625.336	521.564	567.31	521.432
ENSMUSG00000000339	638.982	588.228	378.73	290.255	303.832	388.638	463.354	591.263	490.477	639.706	433.646	626.237	692.608	622.74	506.667	456.809	640.448	272.402	548.154	454.638	562.345	412.575	422.786	207.888	656.032	512.876	423.288	426.521	288.884	661.122	528.966	692.581	449.651
ENSMUSG00000000340	310.54	243.828	277.341	429.755	328.528	426.162	323.903	402.676	519.973	363.328	304.164	294.837	461.689	420.825	319.698	265.219	313.191	505.063	384.198	325.67	345.689	399.631	303.133	350.911	381.915	584.824	300.303	347.974	303.824	282.618	310.63	305.749	357.046
ENSMUSG00000000346	5454.32	4341.96	3471.05	4032.34	3781.01	4579.81	4705.52	4670.71	4402.42	4173.51	3740.33	4498.19	4824.6	5376.53	3410.72	3791.66	4689.09	4746.87	4334.57	4188.41	4736.59	4751.06	3963.86	3639.43	6479.09	4664.25	3753.91	4146.87	4657.23	4798.03	4411.65	4906.72	3575.68
ENSMUSG00000000355	565.969	353.34	488.966	384.986	474.194	390.004	584.513	313.505	315.208	287.303	507.712	697.813	653.439	539.981	564.865	574.298	607.275	476.789	638.01	460.602	617.016	435.086	454.804	363.05	430.182	490.524	558.874	451.561	378.088	483.637	651.127	283.781	566.488
ENSMUSG00000000359	35.3999	35.2283	14.8502	120.509	63.4598	80.3978	37.9993	8.04199	86.6297	24.5623	45.6019	5.81261	35.2991	43.5807	7.11872	11.1504	8.37131	136.495	25.4629	34.7265	26.1191	32.6367	8.27462	81.9959	5.95482	55.8166	6.46616	34.5583	109.539	28.6358	25.55	36.7999	11.4543
ENSMUSG00000000365	3.28474	0	1.24968	4.04162	4.09949	3.56728	1.79322	5.74031	12.0593	2.65746	1.23439	0.903041	4.01283	0.888815	7.91126	6.48811	1.24349	17.1452	2.35785	1.80453	1.17273	8.00188	1.3372	8.39517	15.158	2.30747	0	1.63951	13.3634	6.77368	3.5013	0	1.25137
ENSMUSG00000000374	1253.9	935.485	832.674	1480.33	1113.97	1037.68	1134.13	1307.82	1009.73	766.853	1100.05	1187.52	999.463	1216.13	571.045	1045.11	979.205	1233.58	956.746	994.172	1116.54	1462.6	748.255	960.787	1456.89	1257.64	868.744	1122.72	1112.73	1315.45	1004.94	1074.42	854.252
ENSMUSG00000000378	934.285	999.221	878.009	1523.59	1527.06	1462.32	921.417	779.472	1439.9	814.461	953.402	1119.34	986.513	928.513	856.46	945.889	1033.69	1963.43	958.992	1549.55	1013.16	1653.45	848.388	1136.16	940.186	1511.86	903.9	889.606	1649.04	909.939	932.877	1105.43	937.417
ENSMUSG00000000381	0	0	0	0	0	0	0	0	0	0	0	0	0	0	0	0	0	0	0	0	0	0	0	0	0	0	0	0	0	0	0	0	0
ENSMUSG00000000384	2434.79	2070.72	1513.93	689.132	743.942	1437.69	1874.26	2403.31	1280.36	1542.72	1646.43	1878.02	1758.74	2635.78	1494.45	1496.81	1648.46	603.646	1658.73	1349.02	1848.49	1218.55	1962.6	689.356	2527.86	1204.4	1692.63	2041.75	868.629	2527.46	1569.61	2331.11	1637.82
ENSMUSG00000000385	0	0	0	0.808736	20.8767	0	0	0	0	0	0	0	0	0	0	0	0	0	0	0	0	0.80415	0	0.803903	0	0	0	0	5.16792	0	0	0	0
ENSMUSG00000000386	30.2639	74.4882	349.72	539.544	382.212	883.839	128.369	280.138	310.934	187.035	363.943	580.418	228.006	45.6829	186.974	362.555	200.056	963.593	330.201	504.376	243.618	702.202	226.753	1114.18	838.941	777.402	177.409	160.756	639.653	97.2514	185.942	363.064	341.339
ENSMUSG00000000392	68.5146	54.7484	107.54	237.686	156.54	138.602	88.7853	29.4389	50.4589	13.1486	34.2876	90.1832	158.878	22.0802	30.7367	64.7367	49.0026	272.889	37.0353	99.0698	27.0758	97.1523	20.1101	138.01	52.708	281.698	65.5349	39.2771	140.579	53.2214	76.1577	68.0232	83.0077
ENSMUSG00000000394	0	0	0	0	0	0	0	0	0	0.936229	0	0	0	0	0	0	0	0	0	0	0	0	0	0	0	0	0	0	0	0	0	0	0
ENSMUSG00000000399	1564.47	1562.45	1262.38	766.584	967.865	1200.04	1617.46	1588.56	1428.8	2081.67	1433.7	2014.95	1973.95	1580.89	1733.62	1511.66	1974.74	936.886	1944.45	1435.27	1935.89	1312.06	1494.42	686.411	1375.8	1283.47	1704.95	1458.31	790.913	1662.82	1665.35	1795.52	1518.94
ENSMUSG00000000402	5.91679	31.4928	14.1197	15.9084	5.04259	19.7455	9.92573	27.34	22.2652	16.8522	31.878	17.9939	20.0067	15.7427	30.6072	18.1674	13.0464	7.07215	15.0758	14.9825	30.9924	6.92045	21.7119	26.686	26.3895	17.7044	19.2083	18.7038	13.9443	6.85121	22.8847	43.3436	18.1781
ENSMUSG00000000409	256.941	470.582	684.361	3344.08	3248.57	2864.2	523.395	361.075	2554.34	465.978	887.378	591.477	444.279	256.617	424.171	668.125	470.44	3607.33	548.548	2373.06	517.95	4022.06	476.236	2537.47	344.784	2710.78	490.034	447.741	3937.57	272.732	575.08	453.018	715.118
ENSMUSG00000000411	0	0	0	0.994267	1.00852	1.97455	0	0.942767	0	0	0	0	0	0	0	0	0	2.02061	0	0	0	0	0	0	0	0	0	0	0	0	0	0.942259	0
ENSMUSG00000000416	6.90295	9.55992	2.03433	39.1683	36.3654	19.9543	46.7448	36.4361	38.5666	1.56274	8.24134	12.7232	40.0899	8.32876	1.37197	9.63436	5.07948	19.0376	14.4214	20.02	46.9501	85.6912	43.8756	10.4297	4.35385	30.7392	39.5226	7.50944	54.7691	1.3161	0.830364	7.92376	19.5195
ENSMUSG00000000420	2237.96	1859.49	1945.05	2357.34	1906.16	2532.36	2591.41	1926.16	2264.37	1519.99	2346.46	3260.21	3469.36	2054.66	2044.91	2145.5	2815	2497.02	3066.4	2364.03	3336.42	2300.68	1976.19	1950.13	2102.32	2492.12	2278.95	1803.28	2269.52	2082.02	3445.86	1879.04	2340.18
ENSMUSG00000000435	0	0	0	0	0	0	0	0	0	0	0	0	0	0	0	0	0	0	0	0	0	0	0	0	0	0	0	0	0	0	0	0	0
ENSMUSG00000000439	365.172	279.927	365.137	456.257	262.443	383.821	383.789	344.121	414.153	354.173	358.966	470.791	485.03	504.541	254.508	367.544	414.469	420.383	433.02	294.055	444.544	300.26	309.211	244.397	486.074	436.715	361.331	395.579	341.838	520.123	352.043	451.543	389.475
ENSMUSG00000000440	456.729	47.8393	75.9456	206.293	281.991	112.407	114.473	80.4873	223.743	100.025	63.6678	136.138	169.175	125.863	122.408	107.069	93.234	431.977	845.644	126.591	171.35	220.508	116.328	87.3441	60.6227	393.326	71.5521	156.958	60.2179	118.086	150.309	106.363	106.836
ENSMUSG00000000441	2112.59	1485.86	1503.85	1394.35	1926.45	1722	1599.4	1822.04	1829.68	1500.74	1805.51	1962.61	1670.43	1991.11	1557.28	1899.76	1962.4	2057.16	1909.14	2024.17	1878.21	1896.24	1757.41	1167.83	1873.71	1812.07	1807.41	1402.89	1768.36	1739.99	1757.52	1911.56	1723.32
ENSMUSG00000000486	3293.53	2474.43	2276.78	3093.2	3194.46	3086.23	2269.89	2755.74	3101.84	2269.54	2411.95	2850.1	3016.56	2701.65	2259.4	2295.98	2644.34	3209.84	2614.59	2898.55	2816.49	3377.21	2070.66	2466.61	3006.01	3164.77	2427.84	2200.74	3614.37	2378.12	2905.07	2189.89	2433.98
ENSMUSG00000000489	131.652	139.514	150.616	259.105	283.426	217.17	142.994	138.182	250.522	45.0412	140.154	154.446	115.089	184.159	115.678	153.795	138.866	314.534	121.684	235.848	132.858	252.81	143.9	240.173	107.235	273.641	163.762	97.9513	327.35	144.07	135.969	134.419	188.232
ENSMUSG00000000530	109.573	318.542	75.6567	482.706	605.216	401.204	331.637	257.537	642.427	173.489	220.951	245.883	95.446	325.812	128.145	186.238	333.08	598.358	278.082	510.715	189.314	613.232	131.207	461.356	211.563	799.215	271.62	232.283	515.923	109.194	142.553	336.24	260.968
ENSMUSG00000000531	77.9041	78.2548	52.4448	77.5535	79.6725	66.1475	45.6583	84.8482	97.7732	65.5364	71.7256	70.9761	65.0219	77.7295	66.3156	68.6323	76.2709	58.5979	50.2526	93.8907	64.9841	91.9435	46.3845	68.1976	64.5078	68.8503	66.7235	76.7841	68.7257	66.5545	49.7492	99.8787	44.4354
ENSMUSG00000000532	389.521	387.457	354.002	689.033	734.198	632.844	447.65	373.332	715.39	230.314	428.362	473.841	424.143	440.795	298.93	409.775	440.565	763.793	418.102	771.102	477.883	779.048	398.71	562.384	458.396	709.158	365.968	372.108	722.118	421.838	429.833	424.013	417.087
ENSMUSG00000000538	241.865	329.628	200.644	761.191	543.771	663.36	249.13	296.065	429.629	90.5236	331.437	264.747	211.886	402.491	132.057	293.578	188.078	695.708	206.403	541.365	256.235	656.653	294.323	432.178	212.395	487.543	219.607	311.702	622.404	259.148	216.128	249.54	262.332
ENSMUSG00000000544	0	0	0.805154	0	1.61023	0.788169	0	0.752633	2.84133	5.91357	0	0.798074	0	0	0	0.805738	1.60235	1.61312	0	0.797393	0	5.91629	0	1.57809	0.780269	1.57043	0	0	0	0	0	0.752225	0
ENSMUSG00000000552	452.76	371.689	276.752	392.265	348.035	397.984	509.145	304.596	380.963	229.442	328.126	343.981	286.177	394.108	296.973	343.258	353.65	374.93	327.82	428.209	329.012	376.777	360.6	366.789	454.614	365.133	337.756	299.345	426.663	329.929	273.698	360.984	332.783
ENSMUSG00000000555	440.678	356.862	182.427	346.716	287.982	320.761	391.804	353.485	307.229	222.643	278.061	365.008	346.306	487.896	238.873	294.693	287.491	329.311	296.179	371.406	320.863	264.152	283.624	326.271	498.783	281.765	295.968	306.408	332.886	521.919	260.367	416.155	374.26
ENSMUSG00000000560	0	1.145	0.625573	1.87581	0	7.31319	0	0	0	0	0	1.12395	0	0	0.639497	0	0	1.13588	0	1.123	0	1.11155	0	1.83815	0	1.54284	0	0	1.11984	0	5.13298	0	1.13543
ENSMUSG00000000561	1959.88	1660.9	1370.82	748.29	936.442	1378.66	1655.67	1973.94	1387.43	1312.4	1464.36	2215.44	1885.76	1975.09	1608.26	1628.52	1875.15	962.841	1646.78	1622.08	2021.47	1263.72	1715.66	995.931	1330.68	1487.09	1701.75	1584.12	924.129	1861.39	1546.66	1929.72	1591.23
ENSMUSG00000000562	3.26196	0	7.89506	18.1556	9.08226	10.9433	3.55373	3.08729	5.05814	0	1.78333	5.4548	0	2.41657	1.67051	1.65259	3.1568	24.1412	2.4685	4.90645	0	12.1409	2.98288	10.5627	0	8.49831	0	1.76224	17.1242	0.801304	3.56236	2.31425	4.96076
ENSMUSG00000000563	3651.95	2192.19	2826.51	1799.53	2401.74	2785.53	3768.79	2174.81	2050.54	2613.49	3316.26	4698.72	5160.34	3339.9	4293.49	3228.97	4831.74	2407.31	4557.22	3041.29	4836.46	2948.15	2990.26	1896.66	3230.22	3394.88	3916.97	3073.01	2112.04	3435.25	4015.04	2080.17	3527.12
ENSMUSG00000000567	3.94451	0.954293	4.0342	9.94274	12.1021	7.89824	5.95543	0.942766	1.93608	0	2.98856	1.99928	0	0.98395	1.0202	5.0465	5.01777	7.07216	3.01514	9.9884	1.99949	4.94317	2.96075	13.8372	3.90957	2.95071	2.02196	4.92203	3.98412	0	2.98501	1.88453	4.03955
ENSMUSG00000000568	5811.6	4580.35	4319.83	2125.89	2701.14	4069.46	6396.46	4716.49	3686.44	2178.09	5082.69	7310.53	6918.63	6063.33	5337.22	5284.26	6509.33	2071.29	6178.89	4387.45	6853.55	3561.32	4852.38	2150.96	6623.76	4141.8	6085.9	5030.41	2584.33	5778.37	5730.18	4344.33	5250.25
ENSMUSG00000000579	60.7459	79.6111	55.2351	114.304	109.811	133.548	66.757	45.3058	106.372	53.5725	58.1381	48.6464	54.3142	68.4032	44.2617	64.1742	44.1959	128.795	55.323	115.744	43.9993	115.708	67.7273	115.84	49.4561	163.246	33.5345	64.5431	131.216	58.1265	67.9896	76.7838	57.9552
ENSMUSG00000000581	685.642	438.052	482.772	315.391	411.297	448.564	588.263	550.095	506.148	1301.56	457.788	649.364	751.666	651.212	664.012	533.707	793.572	379.021	602.246	515.542	700.929	472.037	442.735	386.691	591.169	641.128	561.326	521.195	363.9	535.296	726.197	670.533	509.426
ENSMUSG00000000594	1971.27	1949.69	1551.15	2773.03	2677.6	2470.16	2322.62	1611.17	2758.95	1500.78	1709.46	1967.34	1987.67	1723.82	1787.46	1820.77	1928.85	2966.26	2058.35	2697.86	2061.5	2923.41	1844.53	2063.72	2149.28	2417.63	1914.76	1894.99	2723.13	1887.02	1721.32	1931.62	1831.95
ENSMUSG00000000600	960.526	650.376	790.107	1137.78	847.556	1089.64	894.18	712.6	774.953	431.058	974.68	1016.79	1078.69	976.241	737.654	1016.99	953.061	1170.76	908.135	944.247	1069.15	989.575	838.087	923.047	893.485	1154.17	871.718	876.333	1063.26	885.591	1026	631.52	1027.77
ENSMUSG00000000605	816.646	729.531	619.078	1207.94	1224.34	1066.42	859.167	725.143	1047.46	887.654	787.152	884.522	778.969	1027.63	538.548	774.42	802.484	1402.9	789.048	1170.61	795.998	1176.46	716.75	937.342	623.182	1234.45	710.33	750.991	1152.91	783.43	726.918	1015.82	723.87
ENSMUSG00000000606	3.94791	0.95435	1.00853	8.58051	4.12159	4.93639	3.96954	4.71383	3.87225	0	1.15743	0	0	0	0	4.03718	3.01067	10.8611	3.01517	0.998783	1.99953	7.43571	1.97376	2.96149	0.977371	3.93426	1.01101	2.63407	6.97216	0	2.98494	0.942303	1.11003
ENSMUSG00000000617	0.983905	2.15966	12.9247	34.2912	37.0005	21.8344	2.9663	3.30846	21.0483	0.706183	12.0515	2.24064	0.754613	1.96337	2.28675	12.9343	4.00515	51.462	8.83925	28.5382	1.99501	47.5126	1.96932	21.8586	0.975211	24.7204	5.04331	8.95951	34.7555	2.9296	3.75278	12.3565	7.0532
ENSMUSG00000000627	8.55439	16.5571	29.9596	255.45	173.381	198.863	20.9477	5.9477	123.336	9.97921	31.2345	19.7086	6.31096	82.4864	15.2869	27.0621	10.2885	338.423	56.7495	101.612	13.4031	460.681	17.1222	198.645	18.986	237.25	57.818	15.5264	168.931	6.94662	13.0747	116.425	29.4673
ENSMUSG00000000628	763.455	630.808	463.658	341.142	691.22	450.055	655.855	739.741	458.491	249.25	688.776	666.479	737.47	771.614	794.4	572.055	655.821	414.818	607.936	1022.97	707.129	553.955	621.09	414.922	559.294	621.334	805.248	442.71	371.785	682.5	881.778	709.357	927.805
ENSMUSG00000000631	1046.39	1099.98	571.237	1641.15	1453.55	1572.7	1256.02	1018.17	1672.55	339.355	744.431	904.71	1002.97	1209.72	530.549	973.105	878.075	1274.3	1119.87	1474.71	1045.49	1860.83	1036.64	1434.86	1142.95	1805.57	1025.63	1297.73	1364.43	602.967	1191.35	1593.78	990.964
ENSMUSG00000000632	1.09506	0	0	1.37707	11.2093	1.09635	1.46616	0	1.74531	0	0.735776	0.692261	0	0.681389	0	0	0.741228	2.09893	10.1368	0	7.54089	1.36929	1.77937	0	0	20.8276	0	0.681715	1.10604	0	0	0.695904	0.597729
ENSMUSG00000000673	276.392	318.099	255.656	1079.91	1134.71	733.162	405.893	230.087	844.037	366.627	362.612	241.876	372.343	329.571	257.085	445.746	251.326	1011.84	325.206	636.302	257.452	938.032	251.695	574.421	324.058	930.679	357.103	293.485	666.251	377.455	297.222	253.166	402.598
ENSMUSG00000000682	832.078	951.313	1547.82	5684.09	5962.23	4448.25	1817.17	668.507	4466.94	1032.42	1698.59	1648.12	1460.16	705.651	1385.19	1523.21	1544.15	6726.33	1541.41	4287.99	1514.46	5970.91	809.214	4312.59	771.92	4396.62	1376.83	777.74	5906.62	759.323	1474.54	921.381	1648.08
ENSMUSG00000000686	99.0898	88.3732	103.77	133.473	142.073	116.712	113.427	133.807	123.976	142.037	110.896	117.191	134.023	140.547	113.297	95.4522	136.433	155.265	141.772	165.31	156.851	149.013	88.4732	92.4994	129.023	128.019	127.479	101.827	95.1781	97.3835	129.385	108.605	135.27
ENSMUSG00000000690	16.8417	4.61522	41.7277	12.8224	27.599	13.5279	9.60034	12.2492	26.2891	9.05541	56.1488	46.7332	58.124	25.7052	60.6068	68.9846	49.1499	36.2538	55.7162	16.1016	74.9113	12.7497	14.298	12.8419	10.3457	30.3677	56.1103	10.155	16.859	14.1797	52.8777	15.981	57.4207
ENSMUSG00000000693	23.0766	64.7667	136.524	214.36	150.482	143.107	45.282	28.2973	184.801	48.8307	67.5634	37.7892	56.9292	102.25	44.1942	77.839	87.1981	291.457	81.1157	279.796	61.4544	208.458	31.3852	202.506	32.172	135.811	59.0703	85.6241	200.496	28.7765	49.5841	69.0661	60.479
ENSMUSG00000000701	0	0	0	0	0	0	0	0	0	0	0	0	0	0	0	0	0	0	0	0	0	0	0	0	0	0	0	0	0	0	0	0	0
ENSMUSG00000000706	0	0	0	0	6.28621	0	0	0	0	0	0	4.14099	0	0	0	0	0	0	1.0441	0	0	0	0	0	0	0	0	0	0	0	0	0	0
ENSMUSG00000000708	257.419	237.41	260.482	760.636	858.682	507.888	299.417	322.194	551.852	152.94	299.431	365.233	458.776	420.825	224.633	266.322	386.122	823.515	419.582	584.992	329.676	790.773	201.251	724.789	259.14	714.145	312.879	279.955	758.052	321.672	166.122	410.829	280.734
ENSMUSG00000000711	712.276	693.231	630.07	1508.94	1443	1259.48	796.793	667.379	1270.45	520.158	683.077	895.291	792.718	784.145	574.267	794.354	809.376	1991.85	840.944	1251.99	803.026	1507.3	629.875	1248.94	588.79	1483.78	668.788	669.977	1428.34	771.783	721.154	842.675	732.433
ENSMUSG00000000724	0	0	0	0	0	0	0	0	0	0	0	0	0	0	0	0	0	0	0	0	0	0	0	0	0	0	1.01095	0	0	0.97875	0.994988	0	0
ENSMUSG00000000730	0	0	0.651682	0	0.853403	2.28148	0.764575	0	0.745681	0.721187	0	0.770032	0.770556	4.09269	5.02965	0	0	4.20247	0.774192	0	4.92867	0	0	3.96296	0	0.464923	0	0	1.53447	0	3.98948	0	0
ENSMUSG00000000731	1.9578	4.45041	4.49259	46.9229	60.2187	37.8462	6.27929	0	43.3999	1.39017	10.2175	3.71083	9.5957	1.46094	4.54465	6.20539	0.745054	46.1823	4.84426	36.3156	5.9667	68.1745	4.39617	42.5522	1.44332	45.8944	2.25166	1.46169	51.0814	2.17987	2.42391	3.74145	6.74785
ENSMUSG00000000732	169.828	352.106	508.934	3059.02	2819.98	2142.94	517.746	279.621	2093.21	201.024	682.656	416.341	332.727	269.623	255.385	582.971	425.639	3396.41	318.712	1922.17	394.654	2686.27	310.812	2360.69	314.099	2650.71	300.48	272.885	2865.39	212.563	398.5	337.782	574.71
ENSMUSG00000000738	822.722	668.876	934.742	822.561	771.122	926.735	856.472	963.066	1097.45	520.354	1018.3	1088.52	1006.01	938.615	1209.12	1012.79	942.081	791.582	1090.51	990.081	1040.42	968.756	834.322	723.76	759.531	1022.33	1080.74	1003.39	731.832	831.543	1085.45	1072.39	1072.63
ENSMUSG00000000739	13.3735	9.34994	8.81791	96.432	44.8763	45.5141	11.4548	27.4605	27.6408	8.50241	9.12574	12.9058	12.0055	25.731	7.37597	7.01713	9.18574	41.5521	14.6127	29.87	7.85678	48.1529	10.7886	45.4853	14.8204	60.4629	20.3886	12.3085	27.8349	5.3585	13.3526	20.8586	6.81617
ENSMUSG00000000740	7008.28	6375.88	5036.02	3668.49	5989.06	4796.62	6304.28	7181.99	6044.72	11342.7	5572.21	7672.14	7434.5	6608	6938.8	6410.92	7754.26	5419.74	7648.28	7206.69	7492.79	5791.74	5486.75	3433.16	7346.66	5354.81	7319.3	5977.09	4113.99	6756.16	5922.86	6959.01	6246.03
ENSMUSG00000000743	1270.62	837.523	731.418	949.828	1669.77	1149.01	1365.73	1731.28	1771.62	1064.51	868.451	641.121	1025.8	1876.74	648.894	818.504	1443.66	1482.43	1012.89	1363.12	634.817	1936.98	1421.3	1078.94	1608.64	1575.86	1033.44	1518.49	1316.51	861.893	666.004	1707.57	943.013
ENSMUSG00000000751	2846.23	2710.92	2256.79	1543.26	1960.37	2371.96	2895.11	2667.31	2918.76	2341.07	2557.71	3375.45	3507.69	2554.96	2738.67	2484.24	3075.28	1778.51	3079.86	3079.73	3568.95	2509.32	3117.28	1384.24	2715.82	2289.35	2982.34	2736.04	1735.04	2862.09	3054.82	2945	2799.36
ENSMUSG00000000753	155.415	157.05	128.118	434.594	432.253	378.272	197.752	196.322	361.764	211.717	192.524	255.853	203.425	293.799	248.709	204.982	229.094	502.005	247.909	397.9	193.764	346.082	170.036	349.256	185.64	654.233	200.661	146.285	318.632	208.975	98.8303	197.664	163.728
ENSMUSG00000000759	785.855	1126.81	821.724	808.489	874.15	969.517	882.726	1049.39	1125.04	1199.59	1113.64	1143.83	1023.43	1278.81	991.745	933.851	1027.77	900.421	1127.68	1082.49	1193.16	1061.09	1075.41	507.803	1114.87	1095.89	999.501	1050.42	864.203	1058.37	1011.33	1465	1018.05
ENSMUSG00000000766	0	0	0	0	0	0	0	0	0.968064	0	0	0	0	0	0	0	0	0	0	0	0	0	0	0	0	0	0	0.984398	0	0	0	0	0
ENSMUSG00000000776	486.091	384.529	495.667	220.321	287.786	286.605	412.744	474.1	325.756	376.902	425.026	571.411	483.41	547.837	329.631	416.473	515.324	219.53	458.615	414.776	544.628	256.759	362.331	234.041	409.831	389.859	338.458	373.296	228.551	482.976	431.409	476.666	451.525
ENSMUSG00000000782	272.482	579.516	904.224	4838.99	4767.96	3606.58	619.869	550.731	3853.09	319.4	1100.77	896.493	437.372	504.49	460.028	1081.75	637.3	4878.63	589.033	3281.82	506.238	4890.13	561.177	2807.3	523.035	3277.44	587.578	639.192	4897.89	302.687	577.83	823.674	919.949
ENSMUSG00000000787	8555.25	6766.08	4541.85	5354.32	4233.38	6512.23	8725.2	9793.72	6149.16	4328.02	5872.63	8723.09	8509.06	8291.94	4449.96	5496.76	6598.42	5067.89	6320.02	5738.38	8243.58	6726.06	6652.9	4564.66	9104.81	6942.79	5199.84	7235.8	4976.28	8084.08	6947.2	6993.14	5551.45
ENSMUSG00000000791	21.0635	38.7941	38.7711	73.1521	112.584	103.237	24.342	21.7745	54.3142	22.2197	33.0272	19.771	20.8322	18.2638	64.7915	21.5584	31.0633	62.3696	15.9071	60.2689	32.3646	91.6436	28.7596	103.23	38.4333	161.164	22.419	12.4604	77.2211	71.4944	22.0647	60.5207	45.4916
ENSMUSG00000000792	2.95837	3.81731	2.01708	0	7.05961	0.987251	2.97773	2.82828	3.87219	0.936237	7.96953	4.9983	5.00172	3.93564	2.04052	4.03719	6.02137	7.07216	0	3.99533	2.99925	5.93181	3.9476	3.95347	0	4.91787	8.08769	4.92206	1.99205	3.91499	2.98496	0	3.02967
ENSMUSG00000000794	0.640937	1.24038	0	6.5401	3.31685	2.60546	0.645083	0.612623	3.81295	1.86226	0	0	0	1.95706	0	0	0	1.31318	0	2.63581	1.98854	1.96657	0.641374	1.92696	0	3.8352	2.01088	0.639704	2.62853	0	2.62574	1.87421	0
ENSMUSG00000000804	324.388	247.547	137.748	1125.83	840.928	690.774	282.97	536.194	919.605	307.418	388.848	687.487	407.003	409.661	225.088	214.879	661.751	908.495	315.364	928.606	282.071	921.698	138.306	1222.97	472.447	965.378	337.037	383.949	965.98	343.59	593.112	435.705	454.569
ENSMUSG00000000805	22.2666	17.5909	26.3315	51.608	57.3798	37.2589	22.0725	20.0511	29.2504	37.9578	7.76875	8.50455	15.6022	84.4815	25.6296	18.6041	16.573	137.688	28.9606	39.6036	12.758	39.6741	51.8313	22.7796	35.7079	73.5987	22.8468	26.0067	16.7474	24.9009	15.5187	18.8296	20.0471
ENSMUSG00000000811	391.493	249.079	202.719	109.37	104.885	93.7912	292.809	342.221	122.942	279.934	243.07	347.883	367.124	403.406	271.384	242.232	348.237	126.289	319.607	102.88	311.924	122.591	255.608	69.186	417.346	151.471	263.861	268.744	104.583	298.517	305.46	228.967	222.177
ENSMUSG00000000817	2.48052	4.00086	9.30202	41.778	21.1402	16.556	2.49671	3.95234	13.7986	10.9901	11.6938	10.0582	4.19376	2.47496	9.40981	25.8848	5.89021	88.919	15.8892	27.6373	8.82	24.0393	2.48245	24.8616	17.7994	23.0915	3.39063	1.65078	69.6972	4.92387	3.33707	32.2862	5.0806
ENSMUSG00000000823	751.692	790.103	509.615	1146.03	931.425	990.56	831.877	998.953	1050.58	579.721	703.233	654.691	526.09	1033.76	504.694	756.065	516.796	732.056	463.869	932.436	798.862	989.679	852.419	613.177	1024.1	1127.75	571.901	840.635	1007.26	679.811	605.626	734.645	597.118
ENSMUSG00000000826	2287.72	1884.93	1879.81	2203.67	2068.46	2504.86	1978.43	2240.89	2188.64	1431.02	1704.67	2271.41	1812.68	2345.93	1260.7	1743.27	1669.62	2367.96	1713.82	2236.77	1866.93	2273.37	1905.19	2416.02	3102.78	2709.13	1658.95	1862.5	2763.82	1922.88	1646.58	2349.81	1784.46
ENSMUSG00000000827	880.779	812.131	561.61	558.292	607.096	824.978	671.455	848.557	860.255	1293.44	549.494	868.654	928.543	880.378	734.377	713.025	858.364	682.784	841.135	858.552	744.908	826.349	765.608	544.082	825.461	856.543	700.427	760.282	632.669	858.208	778.064	895.734	788.615
ENSMUSG00000000838	1662.35	1129.2	1066.7	1187.15	863.694	1543.57	1664.11	1133.36	971.772	610.911	1302.45	1839.01	2067.2	1589.69	1268.66	1436.35	1547.24	1142.41	1640.69	1095.74	1824.5	1194.04	1479.13	1024.85	1570.38	1598.48	1519.13	1627.18	1100.45	1628.28	1937.94	1116.23	1457.82
ENSMUSG00000000861	550.626	847.515	1089.6	1300.61	1270.52	1410.75	1253.28	590.288	1341.46	327.811	1278.78	1620.2	1345.18	573.439	1159.06	1213.36	1419.3	1383.66	1361.97	1375.16	1472.19	1357.36	874.952	893.087	589.44	1190.57	1244.02	879.044	1047.08	676.856	1184.72	975.869	1323.98
ENSMUSG00000000869	0	0	0	0	2.15113	0	0	0	1.03242	0	1.6772	0	0	0	0	0	0	1.07748	0	0.877815	0	1.01465	0	1.01437	0	1.04897	0	0	0	0	0	0	0
ENSMUSG00000000876	209.991	247.655	201.387	253.414	322.536	223.012	261.526	221.758	249.599	211.725	151.088	298.111	184.363	197.332	195.706	194.059	170.858	286.266	268.994	242.492	256.02	285.99	193.019	181.973	215.906	244.092	219.252	212.51	238.319	188.105	150.686	224.019	199.13
ENSMUSG00000000881	15.0358	35.9547	53.604	198.56	101.35	115.796	150.943	18.5645	79.4252	101.01	59.7587	127.586	39.2	23.1604	14.1252	53.0062	43.7996	144.822	59.0644	107.676	32.1629	338.833	45.1622	70.0475	15.4165	73.2994	14.2046	45.9183	306.427	18.9049	36.6625	22.773	18.8994
ENSMUSG00000000884	102.542	95.1283	46.7351	64.2117	158.627	106.965	79.2294	48.8598	133.043	155.75	113.257	120.055	42.8714	100.956	85.812	108.111	49.5729	80.5182	146.138	115.964	65.9646	85.8567	106.459	57.9555	74.5094	95.3216	97.2837	121.534	81.7195	147.411	131.639	150.19	125.762
ENSMUSG00000000889	0	0	0	0	0	0	0	0	0	0	0	0	0	0	0	0	0	0	0	0	0	0.988616	0	0	0	0	0	0	0	0	0	0	0
ENSMUSG00000000901	31.8653	46.6766	34.1792	118.759	135.861	67.7781	18.7319	15.4509	223.62	30.8612	51.2834	13.4047	34.0129	105.616	43.6723	71.9229	70.2372	119.761	72.3173	147.645	21.3699	156.005	89.4515	41.7497	67.7424	137.867	42.9091	21.3934	90.2825	49.9214	42.9828	16.8465	62.4361
ENSMUSG00000000902	1728.65	1476.74	1391.99	814.255	1149.74	1143.9	1558.94	1535.97	1416.88	1256.97	1422.88	1843.01	1717.96	1589.52	1701.01	1539.36	1755.55	842.055	1613.98	1493.47	1628.64	1424.66	1368.55	745.458	1346.19	1109.47	1652.81	1583.16	821.075	1449.03	1492.57	1799.06	1596.49
ENSMUSG00000000903	1835.24	2077.55	1454.28	240.773	521.244	678.705	1209.75	1766.53	880.078	1673.78	1478.32	1857.45	2039.03	1595	2135.75	1643.31	1833.56	210.381	1861.8	955.079	2063.45	708.332	1665.54	318.465	2076.34	572.356	1932.21	1776.06	353.821	1874.38	1754.32	2144	1728.06
ENSMUSG00000000915	3467.45	3222.09	1696.79	1926.71	1911.33	2602.18	2414.11	3131.2	2534.6	2011.6	2420.32	2371.53	2194.36	3498.89	2061.56	2617.12	2494.25	1897.61	2040.95	2245.63	2618.57	2256.71	2473.5	1675.06	3892.1	2130.6	2257.87	3276.4	1839.69	3275.76	2402.89	3030.4	2367.08
ENSMUSG00000000916	571.499	537.035	478.355	330.392	282.2	408.685	403.924	522.413	430.979	431.701	496.221	591.898	447.273	674.389	461.697	525.664	631.284	281.201	603.382	474.136	674.38	420.733	534.893	278.74	426.038	435.896	518.943	521.419	289.892	598.021	471.918	659.485	536.87
ENSMUSG00000000934	223.151	238.257	222.951	92.9214	140.472	158.738	257.167	258.366	215.013	143.866	281.708	284.767	329.467	274.18	226.452	246.065	274.137	111.67	296.778	165.154	268.622	137.704	241.237	85.4688	197.23	218.296	306.255	203.461	119.936	319.884	251.974	325.586	229.6
ENSMUSG00000000938	8.00099	2.15916	7.16004	26.9222	21.4944	11.0142	10.0666	2.41262	17.3708	8.71386	11.7556	3.04155	5.07268	6.98514	2.06945	11.7981	3.05343	25.5941	10.6671	19.508	6.08364	23.3052	1.00091	11.2599	5.94758	20.7562	6.15185	1.25963	19.7943	3.97052	9.53379	3.82247	3.23054
ENSMUSG00000000942	0.986112	0.954312	3.02567	4.97137	6.05107	4.93637	2.97771	0	4.84026	1.87247	4.98094	3.99865	1.00033	1.96782	2.04047	3.02789	1.00358	13.134	1.00507	2.99651	1.9995	3.95457	0.986899	0.988363	3.90955	7.86862	2.02194	2.95322	2.98807	0	1.98998	0.942257	2.0198
ENSMUSG00000000948	7.83593	4.20915	1.85951	7.22711	18.5548	7.55574	10.9646	4.94247	8.89194	2.59046	9.96655	5.30339	5.53321	7.92139	4.15509	4.78871	5.55959	12.3303	2.78287	5.35484	3.34173	6.43476	22.8183	4.55596	6.29614	8.16074	4.67109	8.26265	48.5727	4.02634	3.8054	4.75228	30.4043
ENSMUSG00000000957	653.389	578.207	535.98	1213.11	988.581	863.508	862.811	785.86	1059.31	431.766	630.023	719.694	776.93	993.651	492.971	678.03	700.93	1314.78	712.273	1310.06	708.176	1189.06	464.382	1009.16	834.674	1222.11	553.405	672.298	1028.98	687.426	533.181	738.182	519.774
ENSMUSG00000000958	421.79	327.717	217.136	247.912	250.385	431.945	446.455	373.97	268.948	188.199	287.947	269.442	365.456	419.273	146.383	187.95	365.236	395.952	335.075	474.887	328.954	303.829	312.218	379.044	232.19	539.039	244.892	307.114	408.759	572.947	235.522	493.828	270.847
ENSMUSG00000000959	1192.58	954.112	936.834	726.95	890.25	985.009	941.214	987.074	932.697	671.9	953.244	1083.91	1158.09	1226.64	1011.17	1008.63	1109.05	740.132	1070.36	981.758	1095.41	971.429	969.311	668.271	1239.95	934.285	1028	1034.52	845.452	1171.9	971.827	892.096	989.724
ENSMUSG00000000976	849.342	571.065	597.981	582.863	718.145	765.593	755.228	716.712	749.565	383.423	568.067	936.122	802.871	860.557	583.67	855.581	618.291	609.133	573.49	632.963	1068.8	759.654	656.113	697.755	694.782	717.763	839.988	619.248	837.462	729.349	648.166	865.6	650.334
ENSMUSG00000000982	24.6532	13.3606	36.3079	14.9141	12.1022	9.87276	16.8737	18.8551	18.393	14.0435	25.9009	53.9818	44.0148	17.7105	31.6274	30.2789	66.2353	12.1237	41.2071	20.9756	31.9922	10.875	10.856	13.8372	18.5704	14.7536	35.3837	22.6415	9.96024	23.4898	10.9448	33.9211	28.277
ENSMUSG00000000983	0	0	0	0	10.4083	2.91118	0	1.13194	0.581148	0.562052	1.46873	0	1.47484	2.04132	2.11668	0	0	2.09607	0	0	2.94798	0.593517	1.45504	4.37161	0.586758	0	0	1.18195	0	1.44301	1.46696	0	1.48894
ENSMUSG00000001014	9.17721	3.94723	2.8997	4.96826	4.83267	6.12526	2.0527	4.51756	6.49429	8.97261	8.59249	4.13475	6.2063	3.92853	8.43971	6.26188	3.00194	0	7.27481	5.74356	11.4977	6.13373	7.14345	3.06603	4.68353	5.6558	5.22684	5.08956	4.11969	3.75199	4.97179	3.61212	7.30986
ENSMUSG00000001016	2078.05	1756.66	1697.91	832.644	1065.67	1387.8	1947	1855.81	1473	2056.8	1997.95	2799.27	2614.38	1967.23	2174.86	1901.57	2475.48	874.483	2592.44	1656.94	2695.18	1311.43	1783.71	849.698	1511.08	1420.11	2136.57	1847.94	873.299	1870.54	2193.55	2145.71	1888.76
ENSMUSG00000001017	2661.11	2333.52	2123.45	1933.35	2309.57	2383.01	2545.75	2470.37	2597	2800.67	2342.06	2884.24	2778.12	2374.72	2463.66	2410.21	2761.21	2288.93	2723.26	2892.61	2669.04	2600.79	2360.5	1777.67	2496.06	2535.11	2344.18	2273.66	1986.9	2471.75	2553.78	2915.51	2276.74
ENSMUSG00000001018	355.024	345.27	252.113	576.879	580.112	520.178	398.393	363.079	534.252	342.144	297.917	391.498	387.02	341.08	251.061	303.281	364.11	689.611	327.287	503.893	314.225	625.372	289.456	426.037	328.48	650.725	304.141	301.094	566.778	358.658	315.923	319.604	300.833
ENSMUSG00000001020	126.977	169.958	172.75	788.935	847.35	509.272	447.295	165.294	953.725	362.227	223.05	198.479	352.025	148.676	228.129	238.698	228.069	1479.48	227.056	1038.17	278.632	951.478	138.876	994.788	181.908	570.267	249.229	126.222	1234.23	145.987	235.443	169.423	208.783
ENSMUSG00000001021	0	1.23541	0	2.78019	6.73669	6.59482	0	0	3.75955	1.212	2.50281	4.81605	0	0	0	2.32672	6.9405	10.8816	0	4.60519	33.6499	6.98494	0	12.6595	6.75948	12.1192	2.61747	0.203924	16.7448	0.202717	0	0	3.92206
ENSMUSG00000001023	1.97226	1.90865	0	0.994275	2.01703	0	0	0	0	0	0	0	1.00034	0	0	0	0	1.01031	0	0.998839	0.999754	0	0	0	0	0	0	0	0	0	0	0.942253	0
ENSMUSG00000001025	767.11	1049.44	477.53	684.72	884.667	523.096	1477.54	993.629	874.018	1898.81	484.717	637.322	859.829	742.946	836.828	562.011	876.456	1016.28	934.899	891.978	966.237	752.992	653.179	758.532	1105.4	615.781	720.265	700.114	766.706	851.903	649.494	786.402	653.801
ENSMUSG00000001027	115.377	153.647	89.7613	215.758	212.796	164.875	88.339	178.181	188.77	78.6437	117.55	102.965	105.035	67.8903	98.9633	119.097	77.2745	256.618	93.4698	164.808	107.974	242.217	121.389	157.151	83.0782	192.781	99.0744	128.958	200.201	77.3206	99.4985	142.28	112.098
ENSMUSG00000001029	626.819	631.357	521.132	608.122	610.181	774.634	620.439	619.11	760.142	485.271	546.472	693.83	658.203	497.934	512.631	536.105	585.819	700.693	566.512	733.12	583.36	714.035	606.415	562.595	375.789	734.591	540.244	677.533	599.478	560.869	606.307	773.051	576.737
ENSMUSG00000001034	473.939	552.448	289.332	420.756	407.205	498.517	407.217	534.066	397.074	183.589	438.368	502.567	477.708	602.441	366.007	485.381	395.386	433.787	395.038	460.162	505.272	391.409	484.422	360.512	359.591	512.908	448.581	467.652	411.347	394.719	448.161	462.742	521.122
ENSMUSG00000001036	409.213	276.358	156.803	405.489	334.314	253.061	476.384	590.669	444.838	668.615	260.957	495.91	401.275	864.257	214.188	225.35	299.212	273.328	377.372	256.166	331.88	400.498	355.064	371.633	397.506	360.572	222.246	282.724	175.635	366.356	254.659	556.711	199.802
ENSMUSG00000001039	25.2672	32.9036	33.1881	17.1602	33.3381	10.1378	26.8267	11.2674	44.2659	49.335	37.0543	58.3492	60.3619	13.9586	60.6841	33.3985	60.0904	29.0357	30.7054	27.829	38.2208	28.4193	21.4891	14.3098	13.5076	37.5516	54.7588	39.9522	14.6579	19.3291	39.8086	49.4154	31.6047
ENSMUSG00000001052	1048.11	1277.42	917.866	1265.07	1549.34	1398.78	1095.89	1161.72	1330.13	382.136	1306.65	1376.73	1023.44	1398.18	775.965	1006.93	1044.15	1265.14	907.069	1374.52	1268.37	1148.55	1091.18	1033.3	1243.34	1347.66	1021.99	1151.03	1450.24	1327.19	973.039	1454.09	1213.65
ENSMUSG00000001053	434.405	398.694	351.631	216.323	301.937	352.937	292.245	356.93	407.276	282.454	390.304	403.195	357.795	396.568	377.01	386.577	435.415	214.48	442.384	425.944	382.566	344.902	486.229	225.175	335.35	357.62	399.347	384.167	272.598	372.542	386.66	508.165	371.221
ENSMUSG00000001054	467.783	459.261	497.329	666.036	722.241	513.807	432.825	468.297	581.752	354.606	433.548	487.92	544.777	401.224	468.625	502.918	501.804	622.644	468.721	568.091	552.856	654.73	460.76	410.653	475.093	555.819	457.524	408.577	608.597	429.22	372.774	438.87	428.952
ENSMUSG00000001056	2235.66	1700.58	1574.48	404.156	845.237	1045.65	1836.04	1930.69	1416.43	3228.2	1655.11	2097.48	2140.95	2142.78	2285.87	1700.12	2247.1	297.857	2204.19	1561.29	2229.3	1106.48	1812.53	562.921	2142.83	1108.2	2043.55	1776.59	571.467	2266.56	1650.15	2105.1	1882.03
ENSMUSG00000001062	147.489	307.941	145.036	404.9	280.127	404.348	277.301	280.944	464.636	133.26	241.85	158.399	170.514	305.801	229.588	249.374	194.273	397.436	80.6544	364.388	230.621	566.61	228.947	234.766	167.949	422.558	177.15	237.804	452.274	251.647	280.342	222.309	225.763
ENSMUSG00000001065	516.711	339.299	518.079	990.548	868.143	851.729	151.877	329.483	205.811	87.857	551.599	827.594	472.551	535.38	505.332	1135.33	159.731	1191.18	776.034	519.927	333.56	258.049	510.562	673.156	353.673	237.599	348.222	491.078	603.516	176.42	163.677	531.151	358.039
ENSMUSG00000001076	0	0	0	0	1.00851	0	0	0	0	0	0	0.999662	0	0	0	0	0	0	0	0	0	0.988632	0	0	0.977393	0	0	0	0	0	0	0	0
ENSMUSG00000001082	461.078	435.199	481.282	408.402	425.868	296.493	430.856	462.196	653.008	364.032	367.397	675.971	483.348	529.189	419.961	567.671	509.01	303.704	539.927	371.859	507.111	364.96	352.967	370.3	657.434	425.654	408.505	409.617	326.556	392.728	449.788	303.749	564.303
ENSMUSG00000001089	1139.8	613.199	788.029	454.376	332.639	735.279	750.968	645.571	700.801	352.453	1047.57	779.243	671.685	849.426	321.292	1015.64	654.427	398.426	863.868	704.342	704.459	584.241	975.316	474.735	1300.49	838.132	498.454	618.649	443.119	717.58	658.261	679.948	715.42
ENSMUSG00000001095	0	0	1.00856	1.98853	1.00853	0.987295	1.98514	0	0.968053	0.93622	0	0.999651	0	0	0	0	0	2.02064	0	1.9977	0.999759	1.97728	0	2.96511	0	0.983549	0	0.984437	0.996032	2.93625	0	0	1.00989
ENSMUSG00000001098	869.374	873.451	671.026	1478.04	1555.12	1504.37	973.676	952.332	1750.55	681.048	1018.69	1126.18	1060.37	930.647	605.387	862.411	974.189	1695.57	900.929	1591.96	1022.61	1670.51	765.244	1198.83	1100.52	1501.51	815.726	832.57	1503.47	1031.35	832.864	1091.43	817.561
ENSMUSG00000001100	1256.41	1079.32	749.772	481.792	596.343	783.919	1056.82	1180.03	915.863	1447.83	971.584	1254.15	1221.6	1291.37	969.346	1000.16	1194.05	524.8	1241.25	822.423	1337.38	729.744	1027.75	468.468	1087.69	971.846	1003.87	1060.41	488.393	1241.31	1121.95	1194.5	1071.59
ENSMUSG00000001103	0	0	0	0	1.03271	0	0	0	0	0	0	0	0	0	0	0	0	1.97333	0	0	0	0	0	0	0	0	0	0	0	0	0	0	0
ENSMUSG00000001105	339.686	268.84	285.824	269.703	318.26	335.219	285.287	296.31	418.779	437.682	367.564	457.137	455.438	332.128	397.125	355.647	437.399	329.673	418.342	390.158	423.628	398.454	275.593	235.807	261.686	380.006	401.904	265.164	339.169	324.242	363.98	326.952	350.606
ENSMUSG00000001119	893.973	795.513	767.127	1545.33	1299.33	1365.71	1343.27	1074.21	1698.08	426.71	825.43	1116.07	737.881	1061.12	681.181	837.301	950.906	2122.61	967.384	1622.3	920.316	1337.95	737.838	1639.19	1030.63	1779.39	858.89	762.539	1441.53	889.235	763.538	1019.01	764.11
ENSMUSG00000001120	8.37426	20.7295	35.9029	82.1747	113.212	32.8877	42.9295	44.9581	34.8244	19.6146	9.78809	26.8012	11.8038	21.091	12.4784	23.159	20.6352	67.6173	42.0115	61.6891	13.0899	56.4064	38.6455	20.1818	13.0819	117.824	11.785	37.5377	112.719	11.4094	15.1391	51.4002	7.78087
ENSMUSG00000001123	4190.93	3552.28	2619.86	1435.81	1401.02	3015.44	3392.51	4940.35	2351.96	4418.23	3057.71	4197.99	4691.86	4266.93	3540.85	3365.63	4274.71	1664.59	3836.25	2266.57	4201.98	2332.33	3612.21	1714.82	8095.73	2526.39	3441.75	3584.33	1573.52	4820.66	3917.37	4854.78	3273.05
ENSMUSG00000001127	842.029	789.054	639.705	1279.89	1452.91	1281.94	875.745	788.006	1348.57	642.848	844.775	877.489	756.607	1070.33	668.056	876.541	752.049	1332.53	693.599	1248.99	739.046	1258.4	798.033	999.103	839.744	1380.54	761.725	818.327	1491.59	924.859	773.161	878.762	875.419
ENSMUSG00000001128	681.906	511.407	635.93	1443.7	1326.14	1072.33	1110.89	699.065	1115.71	651.49	520.682	638.007	591.019	638.59	542.993	692.893	706.933	1945.31	711.246	1348.84	637.864	1525.36	526.558	1346.01	621.723	1255.57	606.076	482.154	1511.48	763.857	498.489	555.768	511.877
ENSMUSG00000001131	18.946	22.1951	43.2127	9.26107	14.2771	14.9748	20.3395	27.6458	54.9597	59.6426	53.3887	53.9574	49.5648	32.8325	86.6588	39.1176	72.0501	45.9724	91.7914	46.4605	85.3311	25.9922	20.9568	60.9651	57.3228	16.9078	75.648	32.849	30.4761	26.7217	43.2629	31.4421	45.9536
ENSMUSG00000001134	286.111	200.507	164.546	126.824	138.479	155.911	238.343	262.765	202.577	467.791	132.31	199.377	243.069	287.286	239.566	171.296	229.731	147.054	259.919	221.612	207.812	203.196	235.099	126.043	266.386	180.872	229.743	175.546	141.89	281.808	171.226	273.041	166.138
ENSMUSG00000001138	525.125	595.455	529.649	394.51	409.255	573.979	378.468	394.06	507.44	158.643	550.266	604.278	515.677	529.459	409.345	658.581	353.102	355.424	511.566	609.247	451.98	438.333	428.407	305.31	286.723	495.188	580.138	603.612	486.532	473.574	541.137	534.663	509.199
ENSMUSG00000001143	293.556	314.441	218.963	350.711	414.114	334.588	292.38	282.715	329.636	165.984	274.115	334.712	259.997	267.627	258.201	321.174	255.929	535.13	245.195	323.379	314.209	300.291	314.176	344.232	149.8	405.214	337.681	292.252	364.952	221.59	315.186	402.085	317.718
ENSMUSG00000001150	1216.31	1169.39	822.423	975.037	1672.99	1146.39	1042.69	1230.52	1755.02	916.792	1141.71	1213.65	1056.96	1213.25	1265.69	1202.2	1213.57	1212.49	899.645	1511.17	1177.34	1427.21	775.639	939.622	987.044	1324	855.796	822.135	850.593	868.895	1054.86	1202.11	1118.24
ENSMUSG00000001151	1751.47	1926.52	1326.08	1307.93	1595.76	1535.92	2016.81	1849.04	1875.1	786.022	1415.26	1914.32	1655.91	1904.77	1155.98	1939.94	1118.5	1150.76	1367.92	1757.47	1529.72	1799.83	1702.98	1275.68	2130.41	1973.67	1523.71	2104.12	1047.78	1716.45	1563.12	1996	1653.35
ENSMUSG00000001155	0	0	0	0	0	0	0.992578	0.942738	0	0	0	0	0	0	0	0	0	0	0	0	0	0	0	0	0	0	0	0	0	0	0	0	0
ENSMUSG00000001156	262.644	250.927	279.741	934.76	912.133	495.491	360.096	310.574	581.173	104.323	345.171	415.934	194.438	288.898	115.602	262.2	159.926	1133.61	131.349	849.703	180.411	780.252	189.243	1141.89	162.27	793.254	246.513	310.082	1200.89	139.019	244.063	469.635	151.405
ENSMUSG00000001157	460.41	342.733	398.322	434.113	517.593	486.352	414.389	348.925	407.352	269.389	458.178	587.118	589.462	462.966	428.396	446.649	513.977	541.491	569.05	512.173	568.751	523.422	383.976	400.143	335.657	503.691	451.07	443.027	499.311	410.615	537.532	338.338	424.819
ENSMUSG00000001158	350.997	281.007	266.842	237.784	336.593	315.376	368.604	318.195	381.453	453.777	318.678	485.568	466.417	347.348	381.686	338.849	485.495	299.565	443.905	421.931	484.342	362.867	291.64	226.099	402.437	374.91	353.408	310.683	263.257	349.725	414.286	394.095	345.466
ENSMUSG00000001166	141.154	121.892	83.4002	196.301	156.553	183.328	138.356	159.889	205.499	151.121	148.836	122.951	108.191	172.622	105.185	118.102	98.1236	285.33	155.65	198.257	126.138	229.85	121.678	185.956	204.824	159.594	71.1242	87.939	162.185	107.817	132.8	93.2174	129.013
ENSMUSG00000001168	0	0	0	0	0	0	0	0	0	0	0	0	0	0	0	0	0	0	0	0	0	0	0	0	0	0	0	0	0	0	0	0	0
ENSMUSG00000001173	203.589	165.351	69.4969	245.191	268.938	220.005	158.816	185.258	200.503	75.2301	147.706	178.829	150.66	173.325	131.407	142.994	127.246	302.013	126.385	151.614	142.999	253.543	117.464	191.929	236.379	295.677	96.7457	128.857	226.238	149.866	152.555	121.114	134.85
ENSMUSG00000001175	11057.7	10518.9	6969.95	6008.83	7197.53	7619.39	10490.7	10316.9	9018.49	12939.6	8524.4	10908.7	9902.58	9856.92	8836.43	8177.35	10921.4	6877.79	10695.2	9434.82	10610.4	8451.81	8699.04	8048.76	10607.7	8103.52	8809.54	9494.22	7637.28	10219.6	8795.98	10474.6	8027.12
ENSMUSG00000001211	823.391	820.456	744.069	1234.57	1505.02	1210.84	882.854	849.909	1261.46	724.509	677.647	833.079	734.982	1105.45	840.422	702.007	909.983	1711	841.072	1368.45	947.11	1440.84	699.61	1223.12	988.856	1420.71	782.226	641.64	1487.26	784.497	749.073	744.482	731.86
ENSMUSG00000001225	0	0	0	0	0	0	0	0	0	0	0	0	0	0	0	1.0093	0	0	0	0	0	0	0	0	0	0	0	0	0	0	0	0	0
ENSMUSG00000001227	95.819	86.7027	62.4436	111.981	110.929	111.95	69.9219	139.55	115.76	100.949	78.064	80.4151	84.6157	145.928	54.468	78.119	77.4504	132.248	70.2378	90.6645	61.8045	98.6427	86.8912	100.239	154.353	111.978	55.2702	93.0467	104.701	101.609	63.8722	112.578	63.3435
ENSMUSG00000001228	5002.93	4465.15	3054.75	594.01	918.968	2400.05	4749.42	4618.06	2074.21	2762.5	3660.95	4427.64	5672.53	5150.97	3971.32	4122.48	3686.97	250.977	3700.14	2354.99	5353.18	1598.51	5205.82	869.765	4822.4	2585.13	5113.48	5252.69	1040.22	5017.2	5417.88	4649.35	4626.43
ENSMUSG00000001229	963.419	1039.32	741.292	741.047	781.137	986.069	959.553	954.272	914.327	436.349	832.428	1088.62	956.641	1089.71	828.748	911.692	898.894	818.413	864.874	936.69	1005.07	901.224	1114.84	789.847	955.147	984.466	993.046	1084.19	870.77	1030.9	905.012	1157.43	958.562
ENSMUSG00000001240	130.633	144.883	153.382	351.443	329.841	204.734	100.72	108.19	321.158	86.1883	116.949	168.971	85.017	170.483	144.01	164.04	177.391	407.531	132.889	284.622	121.508	326.315	124.201	336.396	162.624	297.105	111.888	123.977	330.462	100.166	105.633	174.697	102.995
ENSMUSG00000001247	11.3833	6.96515	14.7219	73.4761	72.9071	44.6221	13.4537	16.4148	54.7457	9.14498	14.78	17.719	11.8835	13.6247	9.81427	16.2419	6.27817	80.6902	17.1077	70.1751	11.5407	68.2713	19.5229	37.1487	20.3015	43.2745	10.5407	14.2044	88.5182	11.2253	7.77235	14.8121	17.7803
ENSMUSG00000001248	1259.64	1052.65	1881.98	4260.09	4638.73	3967.58	1082.06	954.56	3200.27	747.449	1621.17	1413.69	1017.18	1129.4	1522.29	1507.59	1220.67	4951.9	1194.45	3078.14	1235.3	3665.44	1178.73	3420.18	1141.84	2988.86	1257.94	1303.04	5097.46	1218.57	1332.53	1510.73	1503.2
ENSMUSG00000001249	19.2666	7.0743	5.57057	19.287	15.0624	14.649	11.4303	8.27164	15.6536	6.36205	6.79721	11.816	10.0567	3.11776	9.26918	3.95068	5.66737	27.974	6.37232	11.3419	2.49434	29.0305	5.02023	17.3104	4.56364	17.4438	5.53128	8.38442	18.2939	1.79474	4.16564	0.863921	4.44897
ENSMUSG00000001260	0	0	0	0	0	0	0	0	0	0	0	0	0	0	0	0	0	0	0	0	0	0	0	0	0	0	0	0	0	0	0	0	0
ENSMUSG00000001270	102.748	85.4404	82.8602	312.744	322.285	181.735	116.804	76.0301	257.528	71.8484	109.961	95.0284	98.8773	105.96	113.601	106.131	136.188	299.19	104.372	244.055	81.8037	295.262	85.3363	187.642	58.844	207.079	103.895	73.7396	292.028	105.073	63.0512	105.108	110.223
ENSMUSG00000001280	2595.31	3405.44	2253.51	2891.59	1978.41	4454.72	2338.74	5748.8	3713.13	2368.68	3022.25	3427.52	3299.64	3640.06	1452.88	2523.93	3176.29	2929.85	2373.5	2893.2	2083.21	2996.14	3125.49	2746.37	4266.75	3503.6	3745.35	2588.41	3287.92	3621.39	1673.37	5373.34	2117.76
ENSMUSG00000001281	1209.06	1242.88	1347.5	3171.76	3969.96	3180.06	1646.97	707.494	2867.07	416.96	1311.8	1386.18	1209.46	742.276	1479.29	1453.58	1158.49	3494.1	1388.64	2722.7	1408.63	3390.54	1355.46	2811.02	995.781	2713.22	1590.46	976.431	3958.61	864.981	1175.46	1018.26	1667.59
ENSMUSG00000001285	561.857	614.598	497.284	393.788	575.282	535.063	518.974	535.313	579.7	590.895	564.799	637.97	638.028	584.833	711.946	576.357	604.046	468.043	550.819	684.229	602.125	564.019	542.227	360.085	469.811	574.267	619.291	559.958	458.211	595.411	564.109	633.178	644.351
ENSMUSG00000001288	49.544	65.117	162.595	590.161	623.212	468.143	128.137	46.9989	400.646	36.8881	97.9109	129.873	44.3985	77.2548	66.0977	103.937	76.6545	635.663	75.3132	423.607	64.9019	433.512	80.3158	449.451	52.358	453.154	61.492	89.0759	542.865	53.6521	78.0105	85.8069	88.1574
ENSMUSG00000001289	1305.41	1208.26	919.319	1831.52	2267.84	1761.7	1348.79	1317.07	2094	3011.28	1204.56	1418.68	1682.96	1229.59	1362.61	1330.74	1543.52	2351.68	1525.62	2232.74	1374.29	2418.46	1120.01	1466.88	1318.97	2026.32	1225.23	1033.99	1926.53	1350.33	1346.93	1317.27	1288.02
ENSMUSG00000001300	61.031	95.3704	72.406	178.863	183.01	178.415	55.6965	50.5672	199.326	23.1773	136.226	192.321	70.1652	162.862	52.1976	75.6059	72.0478	206.332	91.23	245.387	70.9493	172.565	96.99	140.283	58.0707	315.384	49.2202	153.349	162.581	82.7302	63.2213	71.5338	64.1687
ENSMUSG00000001305	908.031	682.048	733.345	220.366	274.135	472.665	743.311	776.028	459.784	735.55	911.202	1200.57	1104.78	925.79	1064.02	864.746	1029.98	197.846	980.911	580.543	1005.53	410.897	686.812	292.36	816.212	574.466	974.419	710.834	266.275	854.919	1001.66	756.2	897.702
ENSMUSG00000001313	12.5237	4.14022	5.07862	19.0255	21.3293	16.4386	7.99702	6.64621	15.5989	8.48599	6.01963	10.4086	7.05214	8.9182	1.77046	8.13178	6.06421	17.5385	9.10976	12.1333	5.03432	12.8673	4.9696	21.2682	8.85905	19.8114	4.07259	5.94845	29.5584	14.3564	10.0206	4.74476	9.63885
ENSMUSG00000001323	114.207	103.428	81.6778	163.88	117.346	160.955	55.406	84.2571	186.691	46.5955	98.1224	136.346	181.766	95.159	92.3262	100.126	123.106	179.795	104.495	127.438	99.5548	234.192	86.6164	150.048	68.8962	253.965	80.5711	78.4279	165.894	64.9511	119.784	117.629	97.0008
ENSMUSG00000001333	2.99094	4.82419	5.09829	31.162	24.7852	18.9648	5.01751	4.48691	24.4678	0	5.03581	5.05338	2.83346	1.9895	4.1259	7.1429	4.05847	29.2096	2.03224	22.9755	2.02156	26.6978	4.98888	14.7262	1.97634	26.6125	1.02211	8.72839	32.2238	4.94761	3.0178	3.45624	1.02102
ENSMUSG00000001334	0	1.90863	2.01712	10.937	8.06811	4.93639	0.99254	0.942723	3.87221	0.936272	4.98095	1.99931	3.00102	0	3.06072	5.04647	4.01425	16.1649	0	13.9837	0	16.8068	0.986905	5.93025	2.93216	10.8194	1.01098	0.98438	22.9086	0	0	4.7113	3.0297
ENSMUSG00000001348	834.437	951.952	753.275	1746.48	1979.76	1355.8	975.909	1080.09	1571.61	998.891	802.932	960.705	831.846	861.738	900.155	971.022	908.055	2763.51	1031.09	1566.2	900.255	1947.81	798.897	1253.17	1090.84	1752.7	741.518	862.428	1476.29	913.36	692.644	862.656	962.306
ENSMUSG00000001349	0.366884	5.72049	6.13489	26.0856	32.035	26.1784	12.4475	5.63666	63.5652	7.57639	4.1612	9.89621	14.5169	12.0989	1.13873	3.28107	4.07802	8.52236	3.79916	4.45936	5.97612	13.5456	15.456	29.5057	12.6231	59.1954	7.90966	16.8302	44.8534	5.42888	11.5291	11.6084	7.7479
ENSMUSG00000001366	315.148	213.568	247.326	467.03	403.439	442.339	285.618	282.64	475.284	234.278	305.369	329.284	275.6	384.825	294.48	271.577	295.237	567.002	362.901	448.228	295.8	466.42	266.629	359.022	179.045	424.177	194.582	277.907	434.34	276.436	270.387	329.785	307.76
ENSMUSG00000001376	610.354	539.011	610.124	295.092	384.387	373.982	541.968	480.368	563.409	265.248	430.409	576.403	592.771	475.74	571.962	555.302	573.674	412.058	653.883	469.681	430.84	574.788	531.342	380.589	500.884	648.036	605.491	623.403	456.743	563.69	453.59	508.422	575.655
ENSMUSG00000001380	1489.05	1239.67	1567.29	663.181	835.049	1065.27	1300.27	1455.62	1245.88	1107.57	1720.42	2406.19	2287.77	1468.99	1992.53	1821.78	2157.55	721.36	2066.39	1309.48	2241.45	1065.75	1210.93	717.558	1504.2	1198.98	1989.57	1325.02	757.975	1423.09	1940.22	1531.16	1826.9
ENSMUSG00000001383	1269.15	1090.8	1260.69	737.752	1161.81	1006.03	1169.25	1139.79	1317.52	1051.39	1431.52	1808.39	2038.69	1183.65	1491.59	1477.61	1762.26	1010.31	1836.23	1507.25	1783.56	1367.29	1053.03	825.29	1200.24	1181.27	1550.82	1044.46	892.438	1196.02	1694.46	1286.17	1380.53
ENSMUSG00000001403	1975.01	1850.31	1873.15	223.423	617.147	1024.9	1935.6	1782.56	1370.28	1512.7	1754.63	2860.56	2298.51	1841.94	2177.36	1882.6	2629.62	88.2875	2525.65	1417.14	2400.47	909.532	1854.75	491.746	1779.06	943.274	2058.77	1855.08	423.041	1964.48	2118.53	2436.81	1811.95
ENSMUSG00000001415	2441.35	1948.9	1596.47	1716.01	1643.13	1857.57	2324.41	2360.42	1984.11	1382.27	2025.83	2593.77	2220.59	2752.49	1542.02	2259.22	2342.35	1872.77	2181.38	1938.59	2231.29	1833.96	1930.09	1654.06	2175.23	2030.5	1811.57	1984.01	1671.33	2397.54	1941.39	2337.21	1643.46
ENSMUSG00000001416	6139.19	4769.06	5044.76	2051.45	3280.27	3856.8	5008.63	5524.64	4863.94	7479.52	5157.53	6910.28	6746.67	5832.38	7215.04	5330.58	6428.15	2129.96	6181.87	5321.98	6827.23	3908.01	5509.19	2399.39	5800.63	3924.02	6280.31	4951.15	2519.05	5992.34	5867.92	6192.02	5979.53
ENSMUSG00000001418	546.003	535.745	536.307	965.127	1131.97	915.759	664.233	523.1	1136.72	393.55	595.697	692.464	545.477	526.321	515.174	669.562	594.325	1323.25	673.522	1146.45	593.845	1165.33	509.563	808.922	534.891	981.406	582.773	512.593	955.613	516.109	594.395	672.209	562.095
ENSMUSG00000001419	5623.62	6235.53	3832.73	2542.33	3023.25	4260.83	3762.23	5007.15	4142.59	2150.59	4807.56	5491.3	3901.29	5873.44	3486.06	4418.17	4183.76	2970.86	4287.85	3339.86	5007.55	3472.38	5454.58	2572.04	5623.65	3754.89	4518.07	5470.44	3163.99	5451.01	4331.73	6601.21	4507.15
ENSMUSG00000001420	63.6745	51.1443	29.9035	15.4998	27.9258	21.7243	40.1502	44.2391	63.1757	58.2403	52.1794	45.3185	47.716	82.8077	31.8333	37.9158	34.5374	39.1226	45.5727	36.2901	51.1254	37.1225	43.3741	13.9602	40.2303	46.2257	44.2411	43.4682	23.96	44.2058	52.3924	53.5689	40.6572
ENSMUSG00000001424	2356.96	2423.35	2274.61	1366.81	1651.06	2131.9	2627.66	2651.27	2341.64	1337.82	2105.24	3235.27	2709.75	2439.52	2239.89	1948.75	2382.71	1511.08	2336.51	2469.72	3388.71	2075.02	2886.54	1304.46	2644.29	2427.13	2964.31	2557.43	1783.4	2582.69	2223.88	2608.83	2765.99
ENSMUSG00000001435	264.597	219.336	399.512	349.859	358.794	329.278	214.768	343.046	592.971	143.158	314.398	642.955	419.234	503.064	452.897	376.725	516.234	600.8	381.87	320.12	341.038	349.166	258.663	316.036	394.003	334.065	307.328	411.252	218.319	267.145	403.323	498.313	317.365
ENSMUSG00000001436	2099.57	1612.62	1045.2	208.02	406.54	818.01	1366.58	2040.32	1109.96	1656.03	1172.02	1645.5	1380.96	2007.36	1049.72	1195.65	1402.41	253.021	1424.87	773.416	1368.6	767.236	1447.51	368.458	1651.71	827.615	1179.56	1510.2	383.584	2059.89	1167.49	2203.3	1228.65
ENSMUSG00000001440	11873.7	10640.3	7478.87	4179.86	5578.15	7547.88	12339	11588.1	8705.98	5377.78	9696	13660.8	13368.7	11701.1	9075.83	9610.4	11629.7	4873.52	11786.3	9818.21	12905.7	7664.9	10088.6	5056.96	10393	9695.75	10333.6	10427	5337.62	11585.3	11239.9	12241	10117.3
ENSMUSG00000001441	965.492	678.391	532.881	905.187	954.633	850.98	615.208	734.193	987.332	396.038	706.19	880.858	784.25	663.962	466.821	693.142	568.03	972.65	574.824	1075.29	608.063	898.661	716.596	760.195	609.971	1175.8	597.143	625.071	1016.76	811.587	791.628	744.966	731.12
ENSMUSG00000001444	6.90293	12.4063	23.1967	109.37	99.8428	87.8676	25.8069	12.2559	68.7316	3.74495	23.9086	20.9929	12.004	10.8231	17.3441	22.2046	12.0428	111.134	12.0606	68.9198	11.9971	107.762	14.8036	95.8721	9.77392	67.8668	15.1645	14.7662	139.443	6.85123	11.9398	19.7873	27.2672
ENSMUSG00000001445	966.287	763.912	674.852	574.457	595.514	672.534	793.484	801.594	880.685	922.054	753.151	756.11	775.33	920.476	772.994	706.987	909.031	610.014	901.841	753.458	888.367	715.428	796.041	481.003	782.195	796.445	693.036	831.142	504.633	840.206	682.087	1048.94	624.554
ENSMUSG00000001467	766.402	689.207	566.285	357.308	411.272	494.877	402.312	769.462	780.841	680.559	760.565	1215.44	1368.82	807.317	906.087	584.843	810.14	557.541	800.749	480.679	1513.71	554	876.885	412.766	648.533	359.208	949.35	918.687	335.063	476.885	997.245	1091.49	911.357
ENSMUSG00000001472	3910.08	3475.24	2790.03	3951.32	3944.04	4101.26	3331.82	3976.15	3911.68	2679.39	3740.96	4512.9	3983.99	4110.87	2799.19	3665.85	3711.07	4372.22	3749.63	4335.52	3906.4	4238.1	3216.07	3208.3	3502.07	4760.55	3079.24	3542.16	4145.16	4038.01	3703.22	3362.9	2781.18
ENSMUSG00000001473	152.85	110.702	196.668	167.038	138.166	180.672	148.886	215.891	191.674	167.586	224.143	267.91	161.054	231.221	141.813	174.609	253.902	244.495	207.041	199.767	192.953	136.432	135.206	271.802	262.918	241.96	183.995	149.631	222.113	228.047	172.132	206.353	207.028
ENSMUSG00000001482	588.413	531.453	417.095	491.234	285.434	546.456	356.731	490.015	651.744	389.853	431.432	339.008	586.446	798.546	347.689	556.772	547.137	442.956	463.75	524.587	454.282	374.12	345.122	215.648	503.102	447.919	481.086	357.419	185.797	554.265	518.481	627.756	425.334
ENSMUSG00000001493	73.9596	99.2501	78.6671	276.408	250.111	224.112	116.131	81.0771	265.246	70.2176	104.6	104.965	110.037	76.7455	88.7609	89.8275	106.378	270.763	91.4597	186.783	121.97	244.194	75.0048	255	60.5982	233.108	103.118	75.7997	248.01	66.5545	121.388	93.283	95.94
ENSMUSG00000001494	10.8474	14.3149	15.1283	0	5.04258	1.97455	6.94801	7.54207	3.87222	3.74492	8.96572	11.9959	9.00302	9.83918	17.3441	10.093	12.0428	1.01029	15.0758	12.9849	7.99804	1.97727	10.856	1.97675	3.90958	13.77	12.1316	10.8285	0.996005	5.87245	13.9298	3.76902	5.04946
ENSMUSG00000001496	0	0	0	0.989848	0	0	3.88908	0	0	0	4.99035	2.00584	1.52239	0	0	3.03362	0	0	0	0	0	0	0	1.31703	0	1.43085	0	0	5.9881	0	0	0	1.01181
ENSMUSG00000001497	1.97505	2.85782	2.02512	0	1.01464	3.96413	1.98492	1.8855	3.90251	0	0.996176	1.00477	0	4.96441	3.06068	5.05745	3.79528	7.54029	2.01012	6.99229	5.98297	5.82392	4.98832	4.64071	6.84176	2.94999	3.06783	0	9.79734	2.97026	2.98669	4.71126	2.01984
ENSMUSG00000001504	1.34598	6.58755	1.3766	12.038	21.1525	14.6549	6.33033	1.28678	1.32131	5.06044	2.04158	0.454815	8.59686	3.44628	3.2534	7.06463	6.9992	45.3222	3.29349	7.05381	10.5103	15.6966	0.449026	9.19951	2.66814	12.7607	0	0	5.86687	1.56054	3.4697	3.00471	0.45947
ENSMUSG00000001506	2852.53	2156.22	2246.87	1613.02	1777.51	3156.55	2648.87	4044.29	4040.13	1001.73	2041.88	3615.65	2365.92	3052.06	1648.63	1958.61	3401.86	3724	3069.25	4785.66	2476.22	2557.92	2230.26	2644.13	3126.85	4438.13	2573.98	2529.03	2247.32	3550.61	2090.05	2981.15	2269.82
ENSMUSG00000001507	100.792	93.2699	30.5724	162.451	74.2278	63.0433	38.1816	175.5	102.355	68.0627	42.1528	50.3759	34.9089	176.454	33.8954	55.9282	113.194	88.1289	68.2895	73.7715	45.453	75.2828	49.3527	79.652	269.685	96.1023	48.3649	112.965	301.118	157.606	34.9234	68.8673	91.9283
ENSMUSG00000001508	0	0	0.408263	1.56093	4.63826	0	0	0	1.2798	0	0.781966	0	0	0	0.825976	0	4.69552	7.39842	4.03646	1.3205	0	2.61403	0	0	0	0	0	0	4.58082	0	0	0	0
ENSMUSG00000001510	0	0	0	0	0	0.987299	0.992589	0	0.968076	0	0	0	0	0	0	0	2.00714	2.02063	0	0	2.99926	0	0	0.988354	0	0	0	0	0	0	0	0	1.00989
ENSMUSG00000001517	1737.21	1799.34	1430.22	314.79	434.2	952.141	1619.82	1781.71	604.061	719.842	1531.47	1953.96	1951.11	2026.77	1515.95	1812.89	1732.56	162.773	1916.11	781.326	2187.94	486.015	1698.68	324.139	1763.18	909.303	1763.98	1728.22	365.854	2158.82	1990.93	2136.2	2069.52
ENSMUSG00000001518	526.305	347.416	301.317	217.748	390.898	338.904	317.465	298.602	290.555	453.805	338.185	341.854	306.477	415.055	348.514	410.466	371.895	186.915	354.427	334.578	353.868	330.782	312.11	241.612	494.131	356.592	313.511	316.45	270.328	443.065	261.235	460.237	289.147
ENSMUSG00000001520	0.697284	6.73559	0.712853	42.6486	33.9465	19.1758	3.99758	3.29267	42.622	1.63495	7.95032	8.34075	2.8294	1.39147	4.13684	3.56962	5.94491	27.7304	5.643	18.4976	3.1643	26.1019	2.5042	37.313	1.3819	20.7995	3.53092	5.09871	26.4005	11.9411	3.11642	1.33192	1.81936
ENSMUSG00000001521	281.883	177.981	231.366	180.566	195.691	225.804	174.542	142.071	204.836	89.0379	244.069	255.148	283.125	300.799	234.844	224.847	312.449	169.119	168.529	166.78	251.201	129.541	173.201	131.317	156.676	379.821	233.854	132.308	226.478	214.082	204.256	282.619	280.444
ENSMUSG00000001524	362.496	450.132	343.107	151.803	234.759	226.397	362.858	401.706	483.813	246.375	307.789	403.778	460.289	375.173	405.377	344.001	325.188	101.768	556.957	390.855	432.403	328.758	355.076	163.603	292.897	220.634	351.736	402.817	199.498	462.213	451.862	498.56	367.898
ENSMUSG00000001525	18285	19127.4	15604.5	7729.35	10595	15544.7	19182.9	18476.9	17469.3	15339.8	18504.1	22790.1	22257.8	18458.4	19475.4	16897	20289.6	7933.95	19477.8	18293.1	22717.6	14733.7	20350.3	9539.9	21359.5	14739.3	21263	20572.4	10624.8	20275.9	20089.9	22070.8	19348.3
ENSMUSG00000001542	142.692	95.83	81.2848	375.765	258.025	218.556	153.02	110.381	264.903	96.0061	43.5352	104.697	90.2072	84.3803	39.8797	129.019	96.9112	565.523	100.225	259.026	74.3526	348.29	75.801	255.022	183.235	393.202	61.0972	99.4416	324.288	130.717	102.79	101.279	119.636
ENSMUSG00000001552	411.639	238.04	145.435	538.194	865.088	648.754	366.961	257.67	486.777	76.259	124.863	236.375	147.751	240.079	99.04	194.858	180.698	1388.35	129.735	866.573	154.052	724.971	301.505	840.29	370.592	572.923	103.656	281.919	787.461	250.93	148.029	312.018	312.956
ENSMUSG00000001555	132.389	82.2761	148.843	175.374	250.541	227.375	98.3343	117.432	212.008	179.811	191.959	117.937	169.014	173.41	138.018	170.021	162.474	231.31	126.934	232.231	125.07	254.078	167.863	132.302	253.668	228.453	188.415	98.2703	211.476	89.5624	153.48	236.09	168.372
ENSMUSG00000001558	4.46018	0.863273	2.73697	2.69821	2.73687	12.8139	3.59147	3.41122	1.75138	0	0	5.95788	1.80978	2.6701	10.3673	1.82601	1.8156	5.48345	9.26136	5.42119	4.68206	4.10361	2.67823	2.68219	1.76827	11.5755	2.74352	0.890494	2.70296	2.65606	3.60019	1.70467	2.7406
ENSMUSG00000001566	0	0	0	0	0	0	0	0	0	0	0	0	0	0	0	0	0	0	0	0	0	0	0	0	0	0	0	0	0	0	0	0	0
ENSMUSG00000001569	1591.97	1107.4	674.022	520.959	740.278	841.234	1382.57	1384.71	972.37	951.392	829.123	1313.82	1351.21	1427.16	909.612	967.459	1052.62	801.392	1134.75	1132.91	1233.77	947.556	1235.9	524.275	1379.36	941.295	1000.77	1372.83	554.482	1215.68	1162.53	1396.49	946.594
ENSMUSG00000001576	1146.13	1054.77	842.812	626.368	543.63	816.959	976.2	970.286	833.44	758.645	862.273	1038.28	921.379	1353.17	819.29	765.31	1014.76	706.431	898.284	800.284	1158.81	900.128	936.326	686.473	970.029	979.118	924.265	1054.73	766.512	1051.44	946.038	1169.56	884.273
ENSMUSG00000001583	0.71834	1.69327	0	3.62135	3.1968	2.06509	0	4.03223	2.0249	4.42292	0.725648	0	0	9.91996	0.743201	0	1.46206	0	0	0.727617	0.728275	3.31539	4.83561	2.1599	7.08323	3.11779	0	4.65056	5.13483	0	0	3.15983	0
ENSMUSG00000001588	1928.59	1956.38	1986.57	3964.39	4482.15	3557.69	1953.58	2008.74	3857.37	1101.31	2578.96	2552.7	2404.51	1855.18	2092.37	2747.08	2154.78	4565.29	2216.55	3529.94	2281.93	4159.21	1933.89	3066.05	1533.49	3259.37	2266.49	1955.52	3685.29	1818.97	2317.61	1974.63	2432.76
ENSMUSG00000001604	4.6999	4.54833	4.46653	20.8504	27.8782	13.1751	7.56899	4.17513	16.6095	3.56969	9.49573	4.76442	7.62821	7.50299	11.67	9.62068	4.783	34.1894	4.79009	22.8503	6.67081	23.5594	4.70362	18.8424	6.52158	14.0632	5.78192	7.50676	30.4141	5.59764	2.93761	5.38895	10.7246
ENSMUSG00000001622	7.86046	1.90171	2.10294	4.95331	58.3262	4.91844	1.98035	1.87867	2.90616	1.86567	1.68478	0	2.82946	1.96289	0	2.01125	0.99991	3.02021	1.26123	3.98084	0.99612	3.62674	0	4.47358	1.94768	11.3647	1.00728	4.90418	5.95454	0	1.98611	5.56863	2.0244
ENSMUSG00000001627	842.663	439.137	401.518	410.569	486.802	389.775	665.792	634.482	497.864	729.429	522.168	762.325	625.356	878.665	625.049	537.256	661.278	609.841	755.902	527.312	591.146	469.009	498.137	390.262	740.047	512.624	519.558	565.228	387.521	703.62	540.27	523.884	494.164
ENSMUSG00000001630	247.624	218.082	143.68	233.719	227.916	214.782	208.487	247.784	211.277	173.282	178.244	223.688	229.199	227.376	157.397	183.421	195.596	317.229	180.457	246.109	221.91	210.472	203.104	200.867	263.611	241.305	151.372	224.076	238.563	243.187	210.678	208.136	195.452
ENSMUSG00000001632	1533.81	1402.46	1177.52	1008.44	1185.16	1280.95	1305.63	1620.19	1377.56	1023.39	1526.2	1651.19	1559.36	1743.8	1250.33	1451.87	1467.65	1122.53	1366.69	1245.86	1710.65	1318.52	1354.3	982.644	1903.07	1374.16	1281.74	1403.94	1130.41	1562.78	1319.7	1521.96	1449.3
ENSMUSG00000001642	2907.45	2696.1	2801.63	1506.39	2132.39	2257.32	2473.02	2963.15	2677.97	3266.69	2539.4	3274.46	2882.23	2782.39	3355.84	2710.23	3232.09	1795.23	3190.3	2750.18	3294.51	2353.21	2482.04	1464.73	2781.93	2091.84	3066.44	2465.17	1894.37	2738.5	2742.43	3308.45	2935.17
ENSMUSG00000001655	0	0	0	0	0	0	0	0	0	0	0	0	0	0	0	0	0	0	0	0	3.99905	0	0	0	0	0	0	0	0	0	0	0	0
ENSMUSG00000001656	0	0	0	0	0	0	0	0	0	0	0	0	0	0	0	0	0	0	0	0	0	0	0	0	0	0	0	0	0	0	0	0	0
ENSMUSG00000001657	8.72009	9.01025	20.1732	84.02	92.8618	41.6591	24.2675	4.94501	51.4041	8.68012	17.9264	18.8765	16.5413	11.1942	26.5729	28.2309	14.7391	128.936	26.6898	42.0548	22.878	69.7544	13.0388	35.793	12.304	94.2614	10.6055	5.16349	48.5683	11.2943	13.6972	15.3548	25.4263
ENSMUSG00000001661	8.73806	15.3484	31.2209	82.2871	77.1834	43.9222	21.3987	16.6531	74.3109	1.44766	22.1508	14.6846	16.8759	16.3929	24.3585	47.2939	13.966	89.1585	23.1169	50.6089	24.8013	68.0109	19.7209	53.3835	4.53394	73.1685	17.6973	16.8987	72.6	11.3084	13.683	16.8959	24.1534
ENSMUSG00000001663	50.7217	43.525	49.4941	285.272	222.927	175.267	59.9207	35.7741	145.151	36.334	61.8573	61.0966	76.8753	56.0361	41.3539	66.153	60.5843	278.598	85.8035	181.506	39.6614	236.602	50.9389	152.463	19.3871	303.103	37.4904	28.0161	253.654	39.5547	75.7524	54.1482	63.7031
ENSMUSG00000001665	84.4833	106.026	38.5742	131.286	89.3906	51.5745	72.6262	50.6346	84.2724	31.0525	35.8496	57.9189	66.7043	109.667	37.5404	61.0102	56.169	122.976	51.6314	105.926	64.6689	91.7262	67.5674	74.3639	43.9986	56.1532	37.1813	60.676	79.5305	63.5506	45.6443	99.539	42.9807
ENSMUSG00000001666	264.383	227.868	210.734	252.296	356.104	230.397	202.334	249.955	349.528	454.509	203.723	230.964	277.749	238.32	277.144	242.047	272.216	350.422	286.44	328.113	283.022	330.274	214.203	193.221	242.972	278.235	215.492	213.4	229.549	239.191	232.727	230.166	228.381
ENSMUSG00000001670	0	0	0	0	0	0	0	0	0	0.936249	0.996215	0	0	0	0	0	0	2.02062	0	0	0	0	0	0	0	0	0	0	1.99206	0	0	0	0
ENSMUSG00000001672	0	0.804566	1.70053	5.05726	5.10139	1.66463	1.6736	0.794819	6.36892	0	1.67966	5.60759	0.843325	3.37323	6.19846	0.850876	0.846072	7.69403	0	1.68416	0	3.33389	0	1.6665	2.47199	4.14604	0	0.82991	26.9551	0	0.83882	0.794376	0
ENSMUSG00000001674	2124.87	1601.55	1780	820.218	1004.65	1412.42	2048.76	1910.61	1313.76	1519.88	1965.22	3048.69	2548.98	1958.43	2380.04	2087.04	2432.98	1185.66	2050.53	1286.75	2470.86	1299.61	1686	945.309	1815.37	1268.8	2320.76	1715.18	830.921	1951.66	2430.44	1658.99	2169.3
ENSMUSG00000001687	1566.57	1295.91	1041.03	1098.79	1123.9	1297.04	1311.02	1529.96	1476.13	1919.63	1167.89	1645.83	1515.14	1573.7	1119.36	1134.57	1619.77	1328.09	1631.5	1422.64	1548.3	1197.25	1116.31	1096.75	1606.37	1450.2	1175	1260.02	1048.98	1657.98	1369.3	1509.78	1139.66
ENSMUSG00000001700	392.479	398.909	506.294	1205.06	1285.85	1044.54	546.907	553.399	995.157	523.355	630.588	671.774	551.186	549.026	521.343	636.867	612.174	1760.97	593.986	1126.69	552.865	1303.03	299.032	1005.17	706.653	1037.67	487.284	407.546	1313.76	365.071	562.166	527.661	604.927
ENSMUSG00000001707	614.39	684.667	509.357	143.905	287.52	479.646	551.213	762.36	451.032	1367.35	616.241	781.686	973.573	715.115	687.324	511.453	758.401	164.964	758.677	578.433	698.051	357.791	563.777	258.601	735.744	505.098	672.996	533.431	254.317	802.281	750.111	832.053	586.353
ENSMUSG00000001729	4614.74	4162.9	2348.24	1882.99	1889.2	2595.96	3530.1	4079.68	2903.75	3120.58	3260.43	3805.88	3729.07	4162.11	3041.68	3054.97	2779.93	2012.59	3331.43	2981.94	3324.96	2907.9	3717.11	2067.95	3873.55	3395.46	3239.33	3723.8	2180.39	4021.64	2858.57	4178.11	3297.84
ENSMUSG00000001739	34.8395	22.7811	22.1495	39.8743	56.816	34.8801	25.5896	45.0098	38.5503	17.8793	13.317	36.2722	22.9242	41.3379	18.5094	43.368	27.7895	108.325	32.629	24.7974	30.5115	32.0008	55.7153	27.2881	30.7977	40.3844	16.4104	29.1391	27.5807	26.1676	33.0588	41.8492	38.2629
ENSMUSG00000001741	1982.82	1901.36	1977.72	3491.92	3302.54	3234.51	2056.57	1897.08	3228.3	1380.63	2270.72	2656.83	2381.86	2015.09	1864.38	2219.41	2387.74	4416.8	2292.43	3269.02	2374.15	3717.9	1749.67	2781.22	1689.14	3182.97	2302.73	1834.64	3381.3	1773.78	2177.91	2378.55	2218.7
ENSMUSG00000001750	1182.59	844.679	1140.67	1501.77	1536.35	1305.12	1169.84	1208.14	1359.05	668.061	1270.1	1271.67	1208.54	1174.44	1205.93	1566.28	1190.66	1602.17	1202.63	1384.21	1331.92	1422.01	1050.88	1324.24	1406.34	1507.74	1195.25	1039.61	1478.78	1053.84	1072.37	1076.54	1469.1
ENSMUSG00000001751	529.562	455.044	471.165	470.048	477.299	422.935	433.347	420.348	573.251	312.303	342.234	386.297	335.592	502.436	381.316	399.724	345.039	464.181	319.301	431.009	336.779	533.735	468.249	357.364	384.145	485.352	435.315	494.552	458.406	398.296	405.001	445.327	460.573
ENSMUSG00000001755	622.788	502.376	426.547	340.118	417.471	372.03	514.362	551.897	611.462	424.541	543.032	483.156	642.597	531.663	529.674	581.738	526.52	473.653	569.124	599.304	651.405	571.79	524.081	272.855	471.342	506.083	587.487	534.333	347.048	596.369	462.552	604.132	646.016
ENSMUSG00000001761	33.4308	51.3837	54.3033	190.927	182.184	130.926	67.2985	63.921	166.02	32.3001	66.5505	60.802	51.8661	45.1285	40.6908	64.4071	50.0322	254.026	77.1638	149.976	37.8801	166.786	44.2815	150.781	60.0081	224.739	48.9564	37.8692	172.804	42.9394	46.21	50.7335	71.4939
ENSMUSG00000001763	12.3906	10.9965	26.7875	186.113	161.33	127.459	49.9184	21.2228	114.769	21.0838	23.7342	27.2705	18.8537	27.1957	22.4337	35.4314	13.6605	264.111	24.2044	143.686	13.0799	147.711	14.829	176.14	25.5342	114.95	19.5882	24.7083	233.77	19.9898	16.1607	19.5292	36.4476
ENSMUSG00000001767	1046.48	687.016	586.444	613.907	726.971	552.23	815.306	949.665	909.593	659.37	779.296	914.711	786.788	600.595	517.77	504.288	873.416	723.644	1017.02	1000.81	837.137	821.558	757.042	508.789	703.84	582.877	585.626	723.461	468.194	833.888	659.279	855.881	545.005
ENSMUSG00000001768	147.454	52.0249	69.6471	536.987	386.76	328.46	140.383	234.542	491.006	124.069	57.1349	80.233	156.719	148.459	97.4139	64.7016	204.2	554.046	202.331	209.578	78.3099	468.741	87.1944	388.608	76.5211	440.865	112.861	83.5618	472.651	178.832	130.996	144.063	95.7464
ENSMUSG00000001773	0	1.5174	0.801819	40.7384	12.0489	11.7734	8.86511	1.49898	4.61768	0	4.01895	0	1.00893	1.98471	1.6222	3.05389	0	6.42566	1.01368	10.9359	0.794832	9.43175	1.99076	8.64345	0.985754	11.7293	0	0.992849	6.3348	0.987142	1.58208	0.950345	0
ENSMUSG00000001774	1216.53	964.381	830.278	814.062	789.259	1090.41	1129.99	1068.55	1027.69	632.818	1063.7	1591.93	1562.11	1238.68	996.993	1093.52	1455.22	1273.21	1422.94	1145.06	1394.63	897.527	1113.4	1075.76	650.851	1314.37	1180.83	1100.58	953.856	1218.73	1455.64	1333.49	1244.85
ENSMUSG00000001783	3473.28	3294.43	2474.91	1933.84	2486.86	2584.21	2920.25	3775.28	3079.51	3018.06	3011.92	3609.68	4028.4	3469.72	3196.57	3103.11	3399.59	2287.37	3562.96	3294.33	3726.36	2945.92	2912.85	1818.45	3713.69	2778.85	3335.1	3312.18	2194.02	3116.28	3445.79	3385.98	3058.29
ENSMUSG00000001785	1280.01	1020.51	750.333	509.646	584.228	767.03	1204.09	1210.85	832.867	1178.07	1041.96	1310.78	1386.79	1232.72	933.633	854.727	1222.42	505.435	1284.67	877.459	1399.96	686.922	1119.3	515.295	1184.38	998.6	1103.26	1104.67	517.486	1200.93	1225.5	1193.36	846.104
ENSMUSG00000001786	318.864	361.632	205.998	399.365	333.298	291.977	397.424	292.484	417.112	258.659	323.412	266.942	418.318	355.339	201.687	271.243	243.819	423.083	331.412	310.632	166.996	398.572	301.048	331.324	334.689	401.314	213.715	342.267	331.774	251.501	265.145	295.449	219.813
ENSMUSG00000001794	1669.72	1421.63	1214.26	2169.48	2098.11	2020.55	1742.62	1651.46	2305.01	1201.61	1440.9	1758.89	1488.18	1616.85	1232.54	1433.8	1537.07	2702.51	1483.02	2506.95	1479.68	2440.87	1390.22	1870.78	1870.37	2406.74	1533.17	1471.83	2107.81	1519.87	1326.73	1432.97	1279.91
ENSMUSG00000001802	17.3484	17.552	17.386	118.485	33.8714	35.8375	11.112	32.5799	34.9898	13.476	24.8903	19.1852	7.45039	44.4211	12.2376	38.9079	13.8023	113.919	35.7521	39.6025	19.1472	72.8338	18.642	41.8889	22.6657	75.996	23.7129	14.1694	79.5802	10.9572	19.3202	15.823	52.9703
ENSMUSG00000001804	0	0	0	0	0	0	0	0	0	0	0	0	0	0	0	0	0	0	0	0	2.9993	0	0	0	0	0	0	0	0	0	0	0	0
ENSMUSG00000001815	0	0	0	0	0	0	0	0	0	0	0	0	0	0	0	0	0	0	0	0	0	0	0	0	0	0	0	0	0	0	0	0	0
ENSMUSG00000001819	0	0	0	0	0	0	0	0	0	0	0	0	0	0	0	0	0	0	0	0	0	0	0	0	0	0	0	0	0	0	0	0	0
ENSMUSG00000001823	0	0	0	0	0	0	0	0	0	0	0	0	0	0	0	0	0	0	0	0	0	0	0	0	0	0	0	0	0	0	0	0	0
ENSMUSG00000001827	3.58832	0	0	0.632221	0.641274	0	0	0	0	0	0	0.516747	0	0	0	0	0	0	0	0	0	0	0	0	0	0	0	0	3.62433	0.505931	0	0	0
ENSMUSG00000001829	618.229	398.04	405.196	280.162	301.286	544.554	518.794	433.761	392.807	293.443	436.985	566.585	650.622	590.485	435.394	505.843	667.78	332.494	584.253	544.266	611.145	319.857	524.202	375.275	537.5	477.996	451.03	496.233	310.11	608.269	538.856	384.781	569.573
ENSMUSG00000001833	2280.92	1254.68	1799.07	2303.48	2255.91	2383.13	2484.7	1572.68	1616.95	1461.82	2043.65	3074.87	3100.6	2210.18	2107.6	1989.43	2812.11	2980.14	2719.21	2286.33	2719.05	2273.63	1897.93	2201.32	2160.47	2800.54	2290.88	1860.05	2673.7	2342.99	2674.3	1173.48	2132.11
ENSMUSG00000001844	554.32	406.78	297.112	398.994	452.127	455.532	466.316	509.866	528.88	543.88	410.963	434.122	407.395	633.958	462.519	458.981	442.796	445.869	493.701	548.195	518.574	523.844	358.771	313.902	757.66	547.73	325.807	416	447.374	547.787	355.786	455.868	434.869
ENSMUSG00000001847	4999.85	4208.99	3422.57	3372.14	3492.89	3933.18	5096.59	4359.3	4493.11	3526.8	3730.99	5583.15	5044.21	4989.35	3674.18	3721.88	4980.77	4075.5	4964.53	4457.54	5162.25	4226.24	3894.19	3234.79	4994.01	4261.6	3926.9	4142.89	3661.76	4828.1	4125.81	4593.36	3649.3
ENSMUSG00000001855	2539.03	1908.41	1850.74	1226.65	1597.52	1944.53	1947.39	2119.42	2245.81	664.644	1560.19	2250.75	1709.57	2165.53	1682.55	2147.83	1640.47	1367.41	1673.98	2046.19	2124.2	1591.76	1905.29	1133.64	1774.54	2124.15	1861.01	1814.42	1172.21	1522.75	1740.13	2263.86	1776.06
ENSMUSG00000001864	50.4887	4.53491	21.1849	180.985	74.1952	6.71137	3.90639	6.79352	8.31245	5.49817	2.49495	39.7449	2.50533	1.40812	64.5671	6.8844	11.274	131.615	22.5334	46.6729	34.4485	44.0969	6.67066	76.2382	4.82702	157.26	9.91713	39.1384	121.669	23.4626	1.42395	77.4679	2.89059
ENSMUSG00000001865	13.1674	13.2757	12.3794	173.897	101.507	68.6702	13.8077	16.2006	71.2938	10.7256	15.4884	17.1785	29.6957	5.63595	32.1923	24.4523	12.3182	127.317	58.8248	93.1774	15.5438	144.585	10.4986	130.867	11.9969	157.682	32.1777	8.05541	147.275	7.20812	13.0271	30.2161	7.43753
ENSMUSG00000001870	52.9162	67.593	48.8947	302.686	159.525	228.278	181.414	180.822	412.386	69.2762	140.884	179.753	61.4146	128.221	123.824	154.402	48.7635	311.873	51.1072	289.458	166.384	440.876	327.342	337.433	183.559	377.997	209.912	140.506	211.583	133.57	62.6708	64.3136	123.482
ENSMUSG00000001891	535.429	460.632	451.373	632.479	700.988	489.817	646.767	299.422	512.596	297.368	342.565	614.606	795.013	390.48	509.011	468.089	624.07	972.218	629.012	756.346	542.913	507.36	392.79	520.863	565.106	632.241	428.234	426.907	517.737	550.27	516.037	296.935	588.19
ENSMUSG00000001901	0	0	0	1.04437	0	0	0	0	0	0	0	0	0	0	0	0	0	0	0	0	0	0	0	1.03814	0	0	0	0	0	0	0.860172	0.989687	0
ENSMUSG00000001909	1800.92	1649.06	1615.69	798.15	1221.66	1315.35	1507.61	2013.77	1734.58	1585.9	1777.42	1806.36	1628.98	1712.2	1724.07	1838.86	1873.96	866.481	1834.22	1607.11	1791	1339.97	1553.66	831.849	1939.73	1273.09	1644.07	1915.77	973.871	1863.71	1782.69	1707.51	1730.65
ENSMUSG00000001910	2237.19	1880.98	1697.39	1314.43	1400.82	1923.21	1968	1942.32	1758.06	946.265	1788.21	2242.25	1812.7	2344.68	1508.94	1748.76	2024.44	1316.14	1905	1805.64	2001.25	1684.64	1827.49	1292.79	2116.97	1939.3	1904.65	1792.54	1525.2	2091.25	1668.26	2270.54	1796.6
ENSMUSG00000001911	494.297	396.792	784.773	420.596	1132.23	515.378	649.18	1023.85	1518.47	310.053	358.242	530.479	360.156	403.894	685.063	377.289	797.24	860.791	324.321	1382.72	430.084	776.378	370.699	1142.36	643.435	740.88	433.387	385.537	316.04	332.002	338.769	1188.58	340.376
ENSMUSG00000001918	6375.11	6855.56	5623.52	4171.72	4849.24	4280.95	5560.37	7070.25	5828.91	4785.33	5959.67	6746.55	6171.93	7035.93	5644.4	6971.49	6035.12	5949.45	6271.58	4834.45	6853.38	5216.6	6460.35	3633.76	6181.77	6562.43	6199.7	6892.28	3058.21	6938.66	6122.9	7164.6	6275.03
ENSMUSG00000001924	4987.2	4476.09	3741.32	3632.48	3699.08	4466.39	5132.86	4857.11	4156.31	2707.45	4262.67	5236.4	4459.13	5152.31	3592.44	4210.61	4574.55	4149.24	4512.5	4630.48	4752.8	4475.01	4117.37	3387.43	4876.64	4825.97	4131.58	4991.59	4071.21	4761.68	3852.26	5577.15	4293
ENSMUSG00000001930	368.657	209.893	59.2161	793.614	794.405	411.357	237.626	115.853	502.532	41.1813	84.9305	242.914	97.6515	183.839	426.085	107.887	310.87	675.454	175.784	562.122	151.36	783.203	252.965	498.896	434.179	516.349	230.754	101.595	678.041	157.968	174.588	170.741	163.358
ENSMUSG00000001942	191.534	132.207	142.16	384.407	326.133	319.011	254.496	114.909	346.998	105.964	168.63	254.212	196.866	186.508	184.665	252.053	199.481	409.011	201.898	285.085	193.601	294.867	146.97	255.963	174.799	362.125	137.029	187.816	392.986	189.838	248.796	157.757	151.509
ENSMUSG00000001943	7.74539	12.3858	9.85079	25.5171	10.7339	7.04721	15.6733	12.9696	12.9553	5.3787	22.9702	14.7498	6.78585	23.0136	9.70334	25.2326	17.1128	30.4461	8.21496	12.4285	13.0585	25.8492	7.99599	22.4275	18.636	31.5678	10.0116	12.6212	18.3477	7.39849	4.65782	11.878	16.9231
ENSMUSG00000001946	179.604	187.495	211.038	476.215	453.633	180.056	169.399	279.279	339.812	273.952	83.5741	377.743	153.76	374.01	113.156	270.156	351.461	509.205	281.055	238.846	321.884	361.114	290.845	277.081	382.936	193.008	196.849	138.701	320.137	178.754	224.637	302.41	211.556
ENSMUSG00000001948	1.91903	4.64287	12.9886	12.5768	11.7756	6.72443	5.79472	5.41803	10.3612	12.2887	12.601	6.80881	6.8134	3.82946	9.92708	1.96412	8.78834	11.6486	10.7572	12.6345	6.80944	5.77176	9.60272	3.8468	6.45567	16.2696	8.85312	4.78923	5.81488	4.76165	4.84067	4.26009	6.87849
ENSMUSG00000001962	395.022	361.392	329.399	458.548	500.243	412.921	360.274	380.285	519.728	284.805	360.61	392.3	433.161	348.981	412.225	389.348	382.432	624.774	425.294	531.978	400.189	574.904	307.903	426.304	397.298	479.748	325.176	320.515	518.47	371.431	351.836	327.686	339.76
ENSMUSG00000001964	826.753	722.06	532.297	571.236	668.142	712.769	777.412	667.509	811.333	889.99	610.79	870.048	825.311	821.034	685.056	703.95	861.206	689.738	916.903	792.989	821.053	744.199	669.595	527.171	744.299	853.835	738.11	748.777	711.496	809.293	706.875	859.369	593.608
ENSMUSG00000001983	239.629	206.135	145.232	152.124	150.268	210.29	224.321	204.578	212.971	183.502	197.246	270.909	221.074	288.288	190.785	208.925	222.791	163.67	239.202	219.744	232.943	208.603	213.172	132.442	139.767	227.206	215.335	235.274	131.475	262.303	208.947	255.35	193.9
ENSMUSG00000001985	0	0	0	2.98287	1.00852	0.987219	1.98521	0	0	0	0	0	0	0	0	0	0	3.03091	1.00518	0.998908	0	3.9545	0	0.988546	0	3.93437	1.01108	0.984487	0.996117	0	0	0.942228	1.0098
ENSMUSG00000001986	6.11434	18.9943	11.3651	135.09	95.3553	85.1533	32.0634	16.2147	67.1645	7.86977	22.9239	32.8893	16.8109	22.0058	22.1148	24.2356	14.6166	287.421	15.3531	299.961	96.0575	346.453	8.30451	105.945	8.25432	230.056	8.53795	40.4066	396.03	15.5605	100.179	11.5648	37.1214
ENSMUSG00000001988	0	0	0	0	0	0	0	0	0	0	0	0	0	0.983921	0	0	0	0	0	0	0	0	0	0	0	0	0	0	0	0	0	0	0
ENSMUSG00000001995	330.024	298.911	266.472	383.718	391.858	392.086	366.947	294.882	401.144	135.263	271.625	332.017	296.967	310.799	215.359	248.691	261.233	439.177	257.932	416.852	339.335	406.336	289.027	318.144	315.761	480.822	247.1	289.844	400.526	311.17	248.118	343.668	300.088
ENSMUSG00000001998	367.877	444.183	337.773	462.019	330.447	345.33	359.323	367.756	340.908	245.936	371.799	366.149	494.136	376.075	299.145	399.697	529.352	424.398	447.267	443.441	448.223	511.517	303.488	392.915	374.045	496.051	317.99	462.535	320.7	409.025	423.414	463.961	504.577
ENSMUSG00000001999	302.516	284.406	199.906	264.495	254.658	287.775	364.84	266.557	360.338	447.339	250.581	323.945	322.018	265.42	263.526	239.724	319.705	264.888	361.803	347.619	361.43	330.854	254.117	211.993	276.534	308.649	315.97	271.593	274.821	290.922	268.651	300.689	230.077
ENSMUSG00000002006	14.0798	24.029	19.1999	76.6588	121.767	67.5901	17.9509	25.9492	97.889	7.12922	30.5918	18.0791	27.2865	15.9213	26.2202	13.4499	17.8988	89.4349	21.0886	55.7357	25.1729	66.6421	26.9201	60.2103	12.3049	85.8438	15.3966	25.8193	69.4851	13.3487	15.6579	30.4941	20.1306
ENSMUSG00000002007	123.77	160.851	240.741	781.65	791.504	666.578	359.806	114.653	727.002	99.9721	168.248	175.835	131.032	142.553	75.1989	185.458	159.028	728.295	115.071	493.344	139.845	719.406	190.429	422.119	88.412	559.564	119.244	139.22	637.573	116.9	147.466	141.63	193.139
ENSMUSG00000002010	2496.89	2204.13	1928.08	1331.78	1695.72	1712.12	2048.36	2023.19	2171.07	1978.34	2026.47	2585.58	2296.73	2255.28	2039.74	1957.89	2565.48	1601.86	2556.95	1731.47	2646.89	1612.28	2176.29	1185.65	2307.53	2053.98	2224.47	1971.86	1376.98	2270.11	2208.19	2426.65	1918.79
ENSMUSG00000002012	0	10.1296	4.781	19.0173	19.8588	6.96393	2.24853	3.55946	11.6959	2.83928	5.26567	6.19091	1.58068	2.9839	3.09406	2.28642	4.75735	18.3096	1.51786	16.6639	2.2648	16.4239	1.49046	12.1484	4.6839	13.9281	2.36088	6.14327	8.01534	6.36862	4.62266	2.97781	2.28777
ENSMUSG00000002014	1252.35	1130.9	757.994	645.437	764.683	964.404	1032.06	1104.91	1002.62	1979.42	767.365	890.68	1008.23	1127.89	808.516	683.086	995.856	790.59	975.308	799.261	1040.53	926.981	768.491	677.389	1208.12	970.267	720.541	858.137	861.518	1116.56	928.632	1076.84	702.396
ENSMUSG00000002015	1460.46	1230.13	1211.27	1150.38	1440.16	1306.17	1467.02	1303.83	1499.51	1784.46	1291.06	1734.42	1684.57	1418.81	1498.73	1389.8	1696.02	1519.5	1760.85	1643.09	1692.59	1490.87	1254.36	1059.53	1336.09	1499.95	1472.97	1264.97	1101.6	1415.26	1475.56	1506.66	1432.03
ENSMUSG00000002017	762.771	797.661	560.354	551.716	528.743	581.022	820.223	760.315	591.14	524.753	630.53	792.771	754.694	787.002	507.872	659.328	662.764	629.149	721.658	736.384	804.61	572.773	641.495	497.258	569.365	832.798	613.771	703.506	684.595	741.414	695.415	814.7	572.283
ENSMUSG00000002020	178.271	209.07	207.127	1945.04	1170.65	1418.18	348.019	167.7	1094.98	58.8652	144.467	230.939	81.7429	212.683	136.511	349.045	253.471	1727.99	231.941	1089.62	119.155	1635.76	170.001	1097.63	188.33	1233.3	180.067	149.097	1697.8	211.084	222.931	154.702	217.057
ENSMUSG00000002028	3528.68	3504.43	2654.39	5875.5	4461.92	6408.7	3407.05	3181.83	4122.75	638.923	3340.78	4197.8	3107.38	3743.41	1631.54	4243.1	2722.87	6386.76	3065.81	5068.72	3512.21	5121.96	3604.18	6121.65	2832.62	5673.87	2642.29	3870.73	6596.55	3096.52	3100.5	5136.5	2986.43
ENSMUSG00000002031	391.842	227.785	112.82	260.323	214.43	284.771	298.606	308.204	270.701	327.722	261.4	269.183	286.226	331.169	304.46	254.305	217.257	259.181	281.766	243.739	285.15	343.933	273.652	246.847	282.346	286.679	258.408	290.737	222.41	321.945	296.609	385.104	270.111
ENSMUSG00000002032	3.53542	5.13212	14.3971	33.1544	6.32744	5.30933	2.6689	3.09687	2.60295	0	1.78577	3.58394	14.2799	2.6456	2.74331	3.84326	2.69848	3.31878	4.50412	6.56214	3.58431	7.08885	1.76912	30.227	0	9.69729	3.62447	19.8283	7.36163	2.37374	4.90267	1.68906	2.44928
ENSMUSG00000002033	72.6161	142.476	224.339	1588.67	1748.73	1205.57	232.687	84.0026	1389.56	67.78	368.522	290.431	145.634	107.441	108.311	331.767	174.87	2069.22	151.333	1296.59	156.715	1726.57	172.341	1274.42	45.6055	1327.05	164.192	168.24	1699.08	76.7631	260.155	217.362	251.888
ENSMUSG00000002043	400.134	433.889	299.834	187.318	285.957	268.276	288.847	413.713	382.118	649.733	281.838	333.268	273.632	421.128	391.633	356.551	355.524	191.236	331.333	368.312	337.597	306.158	421.697	191.566	411.208	286.283	288.868	357.12	189.142	378.127	242.873	459.921	345.769
ENSMUSG00000002052	2496.81	2291.21	1873.97	2219.87	2291.01	2519.06	2294.2	2511.65	2626.83	1072.99	2138.29	2715.5	2379.27	2648.72	1633.54	2138.55	2088.56	2576	1974.2	2851.26	2280.57	2784.3	2163.99	2079.95	2644.36	2484.79	2048.2	2231.76	2482.97	2225.57	2162.87	2561.71	2072.17
ENSMUSG00000002055	1425.89	1339.39	1788.24	214.996	399.143	758.806	1389.73	1771.97	680.074	1083.87	1464.81	2191.63	1966.37	1692.01	1657.47	1781.58	1979.53	72.947	1684.04	915.109	2019.17	574.095	1670.04	314.002	1805.89	844.656	2047.22	1623.38	267.477	2004.94	2055.78	1736.95	1588.95
ENSMUSG00000002057	0	0	1.00856	0	0	0	0	0	0	0	0	0	0	0	0	0	0	0	0	0	0.999775	0	0	0	0	0	0	0	0	0	0	0	0
ENSMUSG00000002058	308.988	270.483	202.101	357.857	331.027	279.66	239.602	230.804	266.566	326.722	183.733	197.25	206.347	268.323	198.814	216.419	187.723	398.551	229.669	272.098	195.576	319.151	211.828	200.27	306.924	290.117	177.826	192.935	319.036	201.257	157.776	218.54	205.562
ENSMUSG00000002059	31.1807	23.7458	38.0002	152.563	116.695	60.6398	23.0054	46.9551	107.868	19.6162	53.2856	82.4317	21.7546	33.221	66.3603	38.0419	32.947	174.957	44.9092	73.56	55.6541	66.7674	18.5084	103.46	23.2067	127.096	29.7282	24.0364	64.6484	52.9381	18.6947	27.5561	46.0809
ENSMUSG00000002064	349.795	248.284	292.383	504.805	559.181	432.381	314.117	325.392	465.162	370.01	339.098	372.524	408.54	353.044	325.23	368.108	360.759	686.356	355.348	500.103	357.166	594.18	330.877	485.473	272.446	448.28	297.993	269.841	507.955	306.699	379.562	371.094	340.957
ENSMUSG00000002068	691.922	772.123	534.24	179.606	179.136	352.013	827.617	644.927	384.144	774.587	649.539	893.515	903.655	656.291	839.669	627.076	735.402	147.834	781.141	407.073	1147.4	274.55	782.115	162.313	757.599	332.122	806.656	821.745	216.273	885.178	748.605	846.455	774.775
ENSMUSG00000002076	3.01983	12.1133	0	0.997872	3.08838	8.72512	0	0	3.00875	0.626424	6.27799	0	1.53167	0.329182	0	0.337644	0	4.6408	0	1.52938	1.53076	1.51376	1.5111	0	2.99308	1.64522	1.54794	12.4952	10.4146	0	0	1.44273	3.09261
ENSMUSG00000002083	161.332	102.985	100.159	128.609	188.363	130.204	72.6877	145.704	213.739	127.105	118.901	153.245	80.6085	133.956	104.776	129.322	163.849	121.639	178.55	236.661	99.415	207.329	72.1959	141.57	115.631	139.109	138.16	57.0839	124.133	62.6492	104.634	233.794	87.3295
ENSMUSG00000002100	0.986717	0	1.00166	4.97414	5.04536	5.92689	1.98629	6.60293	8.71733	2.8102	0	4.00088	2.00182	3.9379	2.04166	2.01975	1.0041	11.1196	1.00559	4.99698	0	7.91348	0.987432	8.83431	5.8676	3.9365	0	0	4.98285	1.95862	0	3.77105	3.03132
ENSMUSG00000002102	2455.76	2103.2	2000.5	1292.11	1536.31	1891.25	2260.33	2395.04	2093.95	2839.1	2111.53	2735.97	2661.89	2323.98	2363.61	1993.96	2816.98	1561.22	2535.44	2113.21	2634.62	1785.35	2260.5	1389.35	2385.35	1902.84	2321.13	2059.52	1610.82	2465.39	2647.57	2478.25	2175.45
ENSMUSG00000002103	519.788	307.949	323.497	1041.39	779.634	900.111	880.835	416.866	952.857	449.68	435.07	416.98	406.917	380.421	259.284	436.849	504.577	1167.36	498.064	827.408	366.023	928.909	355.326	856.614	326.57	867.397	355.691	364.362	1365.39	499.325	373.089	705.571	338.176
ENSMUSG00000002104	1.86893	4.97071	3.82285	32.521	22.2483	28.1134	6.584	8.27375	14.9809	3.14078	4.17739	2.82308	5.21906	5.77631	2.90038	3.58495	7.55758	25.3665	4.76198	15.9163	1.8822	24.8225	6.62154	18.9782	9.83653	14.8141	6.706	3.73135	25.0602	1.6417	0.942863	4.46443	8.55589
ENSMUSG00000002105	139.819	109.046	114.78	349.824	362.091	268.649	124.598	97.8703	242.333	77.5443	136.775	208.377	93.5215	195.256	82.8959	104.022	101.988	320.731	126.94	272.782	102.126	269.304	124.553	215.28	173.748	261.047	147.053	142.519	320.577	111.881	134.006	176.248	125.09
ENSMUSG00000002107	4439.34	3627.81	2984.47	2788.62	2306.54	3112.87	4083.73	4235.05	3348.12	2201.5	3671.09	3290.39	4111.35	2936.15	2092.33	2464.44	3436.48	2739.59	3208.79	3536.91	4117.92	3535.67	3396.7	2176.45	4431.61	2984.01	2331.61	3575.83	2739.16	4360.88	4656.57	5163.84	2849.26
ENSMUSG00000002108	335.253	355.987	230.575	471.734	289.905	440.421	440.373	264.002	486.997	390.434	300.848	326.224	369.399	229.983	194.961	230.982	310.707	557.357	404.704	431.733	336.392	505.832	329.017	437.005	277.695	647.768	186.72	281.052	537.23	329.466	336.554	313.706	161.789
ENSMUSG00000002109	422.905	351.073	303.468	549.546	712.56	486.996	350.601	338.535	558.135	385.112	248.441	296.954	293.777	374.03	225.335	343.218	293.037	717.749	304.526	614.427	290.368	605.313	256.622	409.429	315.067	568.349	214.952	333.589	564.377	361.76	250.699	327.939	278.361
ENSMUSG00000002111	795.318	728.038	565.863	867.337	824.577	783.792	809.73	677.1	890.21	723.545	707.275	808.751	756.214	818.697	629.877	680.764	791.558	1041.11	856.717	917.094	764.634	884.878	661.21	885.79	732.528	736.807	688.718	741.082	1041.91	751.527	705.694	794.375	686.575
ENSMUSG00000002129	2531.32	3376.2	1772.88	1350.91	1455.49	1771.76	2577.66	3322.07	2854.95	2279.78	2825.75	3310.94	2520.08	3121.25	1976.33	2670.85	2715.61	1149.56	2701.04	2394.02	2520.71	2018.1	2953.18	1634.46	2606.59	1820.99	2339.69	3729.21	1435.28	2870.4	2239.92	4184.42	2485.61
ENSMUSG00000002147	2054.23	1756.85	1805.98	3736.54	2883.44	3075.97	1683.18	1546.87	2608.93	738.556	1867.28	1889.6	1981.43	2175.59	1303.12	1678.48	1663.14	3512.44	1918.59	2052.63	1578.48	2709.07	1520.3	3021.1	1748.68	3055.72	1205.59	1679.73	4062.75	2016.04	1803.75	1839.08	1874.93
ENSMUSG00000002190	1.53882	1.66655	0	4.34078	0	0.862038	0	0	0.845275	0	0	0.872817	1.74684	0.859063	0	0	1.75249	2.64642	1.75514	4.67595	0.872918	0.863192	0	0	0	0	3.15516	1.71909	1.55425	0	2.60628	1.47037	0
ENSMUSG00000002204	2955.28	3051.05	2331.02	1826.94	2041.48	2130.73	2660.88	2905.04	2375.05	3138.44	2576.81	2886.78	2854.36	2638.19	2410.31	2487.43	2747.81	1762.08	2884.22	2224.86	3120.83	2248.46	2410.38	1434.29	3359.15	1974.73	2682.9	2533.82	1518.33	2587.22	2825.37	2780.66	2452.26
ENSMUSG00000002205	828.477	658.009	679.06	712.323	612.253	796.247	637.181	751.508	941.26	525.793	638.589	780.526	753.316	889.149	679.616	577.043	732.183	679.002	837.875	896.557	886.449	725.099	833.468	649.916	574.41	858.309	756.007	781.21	837.376	812.202	744.58	911.228	696.924
ENSMUSG00000002210	566.953	669.731	337.21	552.738	661.472	535.544	474.344	649.57	623.253	416.888	487.189	546.339	472.487	722.811	576.202	656.722	563.494	448.743	434.651	708.359	594.758	647.385	554.537	521.151	718.81	663.649	476.451	637.306	510.491	616.99	536.769	655.069	450.136
ENSMUSG00000002221	1802.86	1634.19	1374.04	564.305	677.672	1006.46	1691.52	1701.96	1008.32	1353.13	1427.84	1525.4	1711.53	1845.15	1207	1338.1	1342.2	405.123	1428.99	1204.73	1564.32	703.707	1377.55	554.132	1911.4	1110.3	1501.3	1611.32	685.686	1929.1	1498.96	2119.58	1372.77
ENSMUSG00000002222	1681.24	1385.73	1192.69	1781.27	1707.28	1890.94	1796.01	1436.09	1475.23	668.657	1503.19	2044.9	2171.35	1660.46	1358.87	1719.12	1709.39	2356.96	1939.08	1964.8	2025.96	1683.02	1435.01	1616.02	1915.47	2040.23	1590.6	1733.33	1874.64	1656.36	2034.36	1409.44	1464.75
ENSMUSG00000002227	270.114	289.026	336.275	429.933	472.15	885.527	460.068	432.251	583.769	127.089	599.831	361.127	294.215	212.852	306.998	734.549	347.389	466.192	287.132	526.58	291.314	706.991	525.015	765.035	743.018	487.8	332.379	211.083	432.826	333.284	398.216	604.142	558.506
ENSMUSG00000002228	2.46258	10.7243	31.8902	137.535	234.981	156.547	21.8754	14.372	156.599	9.93647	67.6224	33.2333	6.24518	9.82827	34.2006	15.7528	27.717	193.785	8.78448	151.914	10.6106	178.622	10.4742	113.146	16.4223	108.752	31.5387	5.53119	240.727	5.49934	33.0778	19.51	38.8367
ENSMUSG00000002233	109.933	101.045	131.047	222.143	260.828	231.721	129.814	174.056	233.422	172.904	122.411	144.604	117.921	174.956	146.174	114.126	177.554	337.045	127.607	267.539	134.856	276.225	123.606	228.585	187.359	288.426	113.182	98.3784	228.313	148.339	117.904	185.893	178.683
ENSMUSG00000002240	0	0	0	0	0	0	0	0	0	0	0	0	0	0	0	0	0	0	0	0	0	0	0	0	0	0	0	0	0	0	0	0	0
ENSMUSG00000002249	28.1674	13.1963	70.362	102.835	21.0306	33.0742	24.3288	13.5284	30.0374	7.49502	11.7718	18.3727	69.2217	22.2357	52.2327	17.7558	33.3117	41.2164	19.4359	32.5899	14.0879	80.0087	15.295	37.4061	24.6456	42.5368	21.1285	11.6326	42.3828	66.8776	11.8863	45.5098	49.8479
ENSMUSG00000002250	302.82	301.018	247.147	579.556	452.45	547.452	312.187	381.437	569.586	143.906	271.065	313.595	291.944	360.347	246.841	313.391	289.192	509.274	217.3	401.735	274.91	492.456	300.186	439.554	328.043	463.126	320.705	414.247	553.289	339.568	259.294	403.977	328.729
ENSMUSG00000002257	861.639	1051.01	699.32	951.218	1037.77	1080.31	897.209	1058.18	1058.43	683.455	1008.6	925.256	939.85	1002.42	689.322	825.715	1111.8	821.948	872.723	1094.09	908.541	1129.92	984.892	810.473	1231	1021.25	717.353	856.764	915.38	916.55	799.802	1180.56	847.695
ENSMUSG00000002265	221.773	117.981	35.6318	114.907	59.0174	53.0428	69.448	187.925	28.1241	40.1063	32.4558	47.3667	81.3862	202.451	15.6141	78.9957	44.1498	171.967	65.9062	88.748	42.7894	78.695	75.3779	53.7837	154.273	208.006	16.6783	60.0414	69.9285	142.343	46.1726	74.8722	47.679
ENSMUSG00000002266	95.8253	13.4446	0.757848	2.97981	2.25579	0.736051	7.83056	111.278	2.17881	4.88112	0.742754	3.94321	0.746634	79.6005	3.80955	1.51546	1.49798	4.54268	2.21714	1.34169	3.71756	2.92829	2.21255	1.62348	5.11822	12.1387	3.01511	1.49103	36.231	42.9163	6.82777	13.3315	1.50944
ENSMUSG00000002274	416.158	362.883	273.323	113.044	210.031	258.296	328.866	265.868	382.733	523.509	367.995	400.448	313.335	476.096	433.014	372.965	407.553	84.5441	406.089	352.504	436.982	253.356	386.705	144.124	377.018	185.93	407.384	383.136	184.098	344.576	329.578	411.699	367.694
ENSMUSG00000002279	267.858	278.986	170.144	193.85	230.301	250.12	232.509	233.079	307.323	225.352	192.137	211.932	219.425	273.049	193.578	217.831	239.92	233.515	218.881	231.849	263.283	281.204	279.989	176.259	248.046	292.893	214.569	264.036	99.4483	282.817	250.748	244.521	219.129
ENSMUSG00000002280	306.425	252.023	524.558	443.686	350.217	506.662	297.29	452.65	242.663	641.252	203.648	761.335	390.563	788.492	207.192	286.216	245.465	244.29	228.419	266.077	967.55	259.607	410.9	316.364	443.329	534.635	244.402	212.275	509.092	459.826	283.57	250.004	465.185
ENSMUSG00000002289	558.527	401.454	363.04	625.503	498.947	373.279	376.66	463.882	378.885	408.196	328.53	460.221	322.206	673.839	428.16	516.057	424.404	1530.39	440.02	644.582	404.343	648.147	453.558	501.311	526.176	608.265	315.152	470.54	443.967	502.981	284.716	592.58	463.169
ENSMUSG00000002297	1327.01	849.072	736.354	270.178	468.613	659.144	1277.27	1001.93	756.54	818.938	983.07	1351.05	1576.62	1204.09	1047.93	1014.09	1313.35	318.157	1208.19	752.417	1357.54	518.308	1074.57	440.604	1318.46	753.049	1121.83	1109.32	426.684	1372.58	1217.53	933.981	1041.93
ENSMUSG00000002307	874.703	774.474	974.886	860.301	877.76	1411.54	806.632	963.758	1035.17	669.121	967.173	1081.34	985.998	927.419	664.189	1072.83	907.549	1246.96	1063.44	1033.38	1198.51	1043.42	624.088	1069.18	1568.48	859.086	728.789	759.536	957.446	798.565	973.875	1339.16	1069.28
ENSMUSG00000002308	126.641	131.855	116.756	53.4375	84.6139	106.227	121.853	141.935	92.0344	193.819	110.403	187.979	168.36	159.704	138.18	120.77	177.948	75.0786	171.835	154.573	152.817	98.3558	111.713	54.7989	119.184	74.1309	166.496	142.914	63.6076	146.745	154.688	173.165	120.807
ENSMUSG00000002319	919.449	763.7	804.736	519.878	811.821	743.915	1012.46	944.362	1019.61	449.178	869.983	1045.72	926.5	1018.3	875.507	974.151	906.492	576.064	987.034	948.392	983.932	954.914	836.205	561.145	758.923	724.652	962.901	903.401	673.101	898.131	917.713	939.769	846.49
ENSMUSG00000002320	872.494	1044.67	754.682	881.352	864.317	827.683	1014.03	1110.72	994.913	882.556	956.536	1112.9	990.375	1079.56	761.627	876.463	1054.84	978.14	1042.5	1091.05	961.784	1019.75	870.721	847.268	1000.42	1094.97	798.604	975.342	763.385	959.575	961.072	1253.25	933.774
ENSMUSG00000002324	0	0	0	21.4388	8.636	4.93159	2.12486	2.72908	11.5484	0	5.85307	13.0827	0	0.70211	2.95334	8.76505	10.385	12.2561	1.43438	29.4853	0	9.49784	2.11273	7.05294	0.697454	17.8342	2.16426	2.10739	10.6613	1.39683	0.710012	0.672371	0.720669
ENSMUSG00000002325	327.441	429.599	782.499	1403.62	1339.05	1766.23	648.277	624.744	1221.75	595.942	811.657	839.489	702.137	471.075	645.164	692.611	444.559	2073	748.633	1345.71	668.47	1850.02	513.934	1654.73	1097.34	1233.52	743.202	521.36	1572.12	358.822	657.604	1024.46	814.13
ENSMUSG00000002326	351.861	306.816	339.29	324.522	273.278	367.984	382.311	315.866	347.811	383.134	371.164	578.003	505.394	342.14	461.579	379.943	509.369	358.865	432.716	411.025	447.432	428.841	380.055	264.567	340.813	403.007	476.603	347.255	314.07	393.575	495.881	417.296	339.758
ENSMUSG00000002329	448.091	457.561	350.951	700.866	885.538	644.948	402.938	469.765	720.792	728.022	488.481	455.637	451.604	469.745	442.412	480.68	471.372	740.458	486.178	807.5	523.211	736.911	342.873	527.276	458.515	702.357	401.391	343.887	677.862	460.056	440.386	547.002	516.957
ENSMUSG00000002332	391.206	342.89	337.298	567.063	790.776	564.766	578.583	285.006	647.259	244.958	425.189	376.179	371.543	348.746	331.479	405.948	374.603	820.678	389.592	648.009	383.914	644.334	292.646	511.737	314.62	610.701	344.148	254.438	776.547	336.556	295.365	320.649	320.152
ENSMUSG00000002341	0.986224	0	0	0.994227	3.02548	4.93645	0	0	3.87231	0	0	0	2.00551	0.983993	0	0	0	6.06192	0	0.998819	0	1.98232	1.97376	3.95355	0	3.93435	0	0.98228	0.996094	2.93614	0	0	1.01115
ENSMUSG00000002342	781.365	522.538	776.614	649.688	402.058	134.719	784.034	335.506	329.872	278.547	405.564	381.33	406.841	420.754	666.216	128.746	662.245	582.103	432.496	299.247	147.155	149.861	714.132	861.496	567.377	321.439	244.904	494.726	717.692	599.432	520.93	451.242	639.99
ENSMUSG00000002343	281.12	174.57	144.598	100.921	120.976	175.044	187.379	203.236	138.338	148.157	210.79	234.548	250.63	269.694	213.43	197.264	213.039	110.522	231.581	228.46	260.856	142.279	251.598	107.439	93.5119	206.177	135.202	211.108	88.7959	205.165	198.44	224.626	128.618
ENSMUSG00000002345	286.585	205.033	205.101	291.217	316.619	272.331	227.271	204.759	357.616	140.365	205.253	236.735	179.674	231.073	185.959	203.715	191.576	315.446	202.227	310.082	217.219	304.788	237.487	266.253	194.419	321.659	204.158	200.841	304.136	257.252	173.156	246.836	217.328
ENSMUSG00000002346	72.4527	93.9217	92.7821	201.218	199.237	174.36	104.142	109.285	186.331	38.5169	125.823	126.03	124.094	122.321	86.5682	131.552	91.9941	272.77	96.8746	154.364	152.948	154.768	78.0186	174.723	69.2987	219.35	102.337	79.4321	219.838	81.0731	129.207	112.947	112.438
ENSMUSG00000002365	1212.28	1078.55	854.99	1142.36	1162.85	1098.23	1173.06	1108.24	1161.65	754.002	925.726	1192.79	1249.19	1186.32	906.103	1006.47	1083.02	1482.95	1031.62	1142.84	1119.13	1295.24	1000.9	1050.09	1131.72	1300.14	1024.7	1031.78	1088.05	1150.32	1090.09	1056.52	976.729
ENSMUSG00000002372	1753.22	1477.49	1347.49	1168.04	1396.28	1542.23	1352.73	1616.12	1466.81	1122.55	1502.79	1750.3	1492.29	1683.87	1358.83	1401.59	1527.56	1024.42	1505.27	1654.23	1621.57	1502.1	1347.05	955.342	1525.37	1516.28	1373.95	1571.84	1231.32	1646.26	1398.4	1855.36	1509.58
ENSMUSG00000002379	565.868	520.896	476.187	291.852	482.238	421.758	440.073	499.072	508.963	1016.64	532.546	574.066	550.022	611.873	642.322	534.317	633.583	378.443	605.497	537.137	593.124	497.123	474.637	268.78	598.248	484.193	599.507	529.686	319.748	575.696	481.133	564.382	663.869
ENSMUSG00000002384	0	0	0	0	1.51195	0	0	0	0	0	0	0	0	0	0	0	0	0.606203	0	2.64375	0	0	2.95909	0.593023	0	0	0	0	1.49324	0	0	0	0
ENSMUSG00000002393	243.19	229.693	61.8372	300.822	288.081	309.512	195.365	62.3004	168.191	63.11	68.9526	302.715	256.197	194.952	312.516	186.802	155.7	339.521	168.382	155.521	79.8616	220.951	333.214	232.958	155.135	255.83	232.297	141.581	291.43	152.963	84.4008	337.53	268.967
ENSMUSG00000002395	872.907	784.362	656.824	1166.37	1335.84	1088.88	704.63	905.665	1222.44	1390.91	766.623	816.263	797.052	899.472	776.794	870.186	871.763	1319.87	842.574	1263.34	728.94	1260.57	673.793	917.484	930.942	1178.14	767.877	748.934	1161.06	827.953	718.034	864.28	832.723
ENSMUSG00000002396	177.88	135.328	182.712	234.772	307.782	259.694	195.41	142.761	155.91	40.2031	226.706	130.104	116.888	142.074	165.479	170.061	133.857	208.535	127.157	221.059	109.873	245.073	124.307	188.355	88.6549	194.232	156.54	165.511	220.415	117.002	121.22	208.699	151.425
ENSMUSG00000002409	62.3623	62.7499	64.2027	175.154	189.639	167.789	82.9485	86.9001	121.059	27.2624	63.7146	72.6865	44.4204	62.8471	50.7921	96.3398	58.2241	227.763	56.6445	136.57	61.2276	140.285	58.4028	126.692	68.5147	147.966	65.2546	69.228	194.877	63.6258	50.5641	101.785	67.8322
ENSMUSG00000002413	486.194	693.821	489.353	745.006	668.444	744.198	463.417	410.846	597.348	306.339	415.788	720.426	641.581	732.48	236.827	444.737	377.135	629.611	661.531	653.656	563.712	933.758	746.434	572.801	1022.57	1011.31	281.285	363.849	474.149	436.026	375.033	378.519	538.658
ENSMUSG00000002416	410.778	378.215	359.446	184.636	269.673	295.291	395.096	358.884	419.638	820.202	391.524	509.859	436.244	381.255	487.938	383.735	565.483	195.704	542.407	420.079	496.813	321.548	321.585	236.76	308.039	283.938	435.001	346.245	209.801	326.745	418.892	449.874	402.298
ENSMUSG00000002428	583.458	470.942	487.957	918.406	787.58	877.985	825.107	575.371	628.54	315.868	651.076	771.094	887.695	720.571	548.784	692.133	867.671	895.558	715.7	765.188	747.877	823.63	712.889	723.182	512.095	1044.51	911.155	795.085	956.237	629.306	704.635	531.791	652.102
ENSMUSG00000002455	1030.18	1113.36	718.519	940.686	807.879	1457.26	1132.09	1342.18	1529.69	465.048	849.266	1247.63	1143.11	1226.86	767.193	914.626	876.428	1252.37	897.399	1254.54	942.264	1506.69	1092.63	791.559	1184.72	1186.03	849.628	1033.63	1436.02	905.89	957.219	827.943	700.993
ENSMUSG00000002458	1191.55	920.264	879.408	1063.81	1117.43	1105.29	972.352	991.679	984.777	804.71	742.139	990.65	851.301	1124.41	958.098	992.607	1051.44	1160.91	1100.09	1113.33	979.661	1190.13	955.349	1055.79	878.896	1229.59	930.057	969.529	1160.41	1022.72	885.027	970.144	931.066
ENSMUSG00000002459	0.591397	0	0	0.591739	0.604822	2.76003	0	0	3.87625	0	0	0.599516	0	0	0	0	0	0	0	0	0	2.76384	0	0	0.586147	2.74969	0	0	0	0	0.596699	0	0
ENSMUSG00000002475	11.5711	1.285	4.95536	66.3275	28.4622	14.7153	4.67187	5.1328	5.5491	3.8334	4.68891	13.2345	5.73417	6.17485	5.01278	5.78554	18.1021	40.5347	5.76121	10.9698	14.6494	14.5726	5.65719	4.6521	3.83369	15.4318	4.96719	1.5445	12.2345	15.1488	3.25913	10.6836	3.30799
ENSMUSG00000002477	1682.7	1766.37	1962.08	412.582	760.696	964.338	1670.93	1784.81	1430.9	3930.03	2582.27	3395.91	3927.11	1784.15	3255.1	2365.85	3797.13	361.35	3620.49	1639.85	3312.8	1167.6	1493.66	503.81	1717.06	1129.24	2838.93	1516.85	511.522	1812.66	3239.42	2016.11	2458.76
ENSMUSG00000002486	196.187	161.568	147.723	270.286	322.757	303.622	164.399	203.288	315.681	130.731	151.293	179.856	279.998	235.653	175.026	171.605	165.979	269.437	207.269	270.267	246.404	280.174	194.347	267.01	154.216	283.694	149.397	233.607	217.901	250.076	180.429	224.004	195.906
ENSMUSG00000002489	154.536	445.005	206.963	281.171	682.992	362.294	324.515	116.747	281.595	54.9193	238.28	52.2384	75.8351	450.021	118.156	80.4889	97.99	539.019	38.2445	956.246	78.0325	823.494	279.568	328.518	369.646	398.156	36.6048	124.453	411.421	418.584	29.6152	724.362	43.9531
ENSMUSG00000002496	867.205	514.457	389.624	1038.88	1909.55	871.049	591.614	638.688	1123.33	122.653	469.571	1095.34	510.688	997.707	1320.17	910.97	1252.61	945.496	1255	1025.99	717.437	1294.4	704.995	747.465	559.43	939.888	589.694	904.48	1301.65	643.201	709.007	1035.52	973.834
ENSMUSG00000002500	0	1.29713	0.984419	0	0	0	2.90647	0.920196	0	0	0	0.975741	0	0	0	0	0	0.986143	0	0	0	0.964984	1.92658	0	4.77002	2.15049	0	0	1.94438	1.91065	0	0.919715	0
ENSMUSG00000002504	121.7	103.687	106.211	311.397	321.089	216.255	114.582	122.984	248.641	63.275	90.6402	105.317	99.8412	150.525	89.0639	146.655	131.073	396.047	142.089	274.715	113.79	234.809	116.706	209.126	92.368	365.831	73.1086	92.1509	247.251	95.5947	94.4635	140.434	110.292
ENSMUSG00000002524	2286.89	2059.65	1824.09	1450.81	1853.74	1916.9	1909.14	2014.96	2170.94	1900.55	1941.34	2387.82	2161.2	2150.3	2064.75	1865.97	2225.47	1536.97	2287.95	2079.21	2274.87	2025.59	1934.46	1373.95	1901.72	1956.29	2033.04	1990.25	1728.27	1964.28	2006.88	2367.17	2029.36
ENSMUSG00000002546	801.455	664.043	495.162	1283.61	996.771	911.438	709.289	933.418	973.763	373.321	638.97	722.265	825.841	731.26	359.072	776.329	526.487	1339.24	578.505	1064.61	706.958	998.276	623.627	930.029	820.638	1280.37	400.825	782.452	1170.21	681.413	751.583	887.692	534.913
ENSMUSG00000002550	703.098	677.962	513.49	584.029	711.213	660.298	507.377	746.901	756.965	639.661	591.947	690.899	639.795	755.913	597.43	626.2	649.43	863.381	754.06	748.482	635.7	748.479	688.576	462.914	674.559	781.727	558.236	635.583	552.953	709.127	651.652	816.345	673.274
ENSMUSG00000002565	6.81925	5.65658	8.96705	31.4314	44.8334	19.5064	8.95661	6.51941	33.4714	12.0236	12.7936	16.7884	5.92932	14.58	9.20634	16.9784	9.91411	60.8824	12.4703	39.4696	7.90117	41.0199	5.8497	36.1314	10.6211	31.0932	5.99233	4.86246	36.4066	10.6358	8.84637	11.1701	10.9743
ENSMUSG00000002578	5.67869	16.8355	13.7937	155.662	201.603	172.71	16.7442	10.858	110.625	5.16075	24.3808	11.5134	14.7705	7.79076	5.87516	53.4161	8.71979	181.333	8.68158	142.881	13.9512	248.695	8.31354	122.863	17.2618	75.8694	27.6456	10.8712	213.682	4.93169	58.4287	28.1757	87.7859
ENSMUSG00000002580	305.7	312.065	289.455	327.116	461.899	346.534	318.616	300.74	475.313	490.587	361.617	400.865	476.16	296.159	503.999	367.385	437.554	404.123	461.319	509.407	457.888	459.717	277.32	275.756	238.483	349.17	404.385	284.495	345.62	330.815	405.954	415.533	385.78
ENSMUSG00000002588	0	1.44198	3.80981	6.00939	32.001	9.69651	2.56177	1.4245	5.85089	2.41638	5.14222	0.755245	6.87245	2.53943	10.7819	1.52505	6.89461	22.1353	8.59991	8.30081	1.51061	7.46915	5.14693	3.73357	0	8.91708	0.763785	3.38152	7.90584	0	3.41785	2.13561	6.10379
ENSMUSG00000002602	807.146	1004.8	497.333	2388.05	1284.84	1865.62	1586.59	1156.65	1948.46	476.094	873.566	1158.27	679.902	1214.37	422.027	789.627	682.194	2454.55	759.553	2017.82	715.119	2236.77	711.154	2803.1	1263.2	2354.61	635.598	625.358	2629.69	953.71	749.028	1040.77	594.153
ENSMUSG00000002603	1048.58	963.059	1058.49	1717.39	1329.47	1585	1682.29	1060.83	1561.08	608.164	930.394	1340.12	797.92	1367.93	802.206	1089.98	1103.31	2303.36	1424.15	1868.78	1151	1520.4	1103.14	1322.24	1320.02	1564.41	966.788	1044.21	2167.9	1167.99	1029.23	1078.07	1040.78
ENSMUSG00000002608	640.592	703.368	601.449	801.306	729.434	852.808	633.132	754.747	841.156	281.709	790.791	769.881	601.98	966.094	519.857	767.975	699.07	829.185	640.328	855.192	641.045	794.497	750.373	766.024	875.691	804.747	611.036	703.252	753.068	707.3	595.172	831.929	712.965
ENSMUSG00000002617	41.8459	95.6741	41.415	137.497	143.972	79.4305	74.7778	43.6155	48.6769	38.3904	50.8984	87.6217	38.4692	48.6773	43.383	44.5988	49.2129	138.68	46.7369	112.772	67.0036	140.059	50.0654	83.3939	22.6817	120.661	48.3576	67.6107	110.107	34.3941	57.0042	50.4833	95.496
ENSMUSG00000002625	396.424	398.909	401.404	1071.83	1234.42	939.887	459.561	507.203	1087.12	309.894	511.045	499.832	422.142	486.055	381.57	580.346	441.568	1136.6	422.122	917.931	455.888	1068.72	433.251	737.325	405.617	1008.17	409.44	436.094	952.199	404.221	424.858	517.296	520.096
ENSMUSG00000002633	0	0	1.00854	0.994265	1.0085	0.987288	0	0	0	0	0	0	0	0	0	0	0	2.02064	0	3.99536	0	0.988617	0	0	0	1.96716	0	0	1.99207	0	0.994985	0	1.00993
ENSMUSG00000002635	304.482	271.506	198.387	171.548	219.1	252.1	221.48	217.767	291.557	237.399	243.087	307.013	238.791	223.965	245.196	270.875	271.042	145.279	374.6	219.122	322.093	235.925	198.754	154.186	225.38	247.358	241.375	232.076	140.32	323.018	228.701	278.735	254.311
ENSMUSG00000002658	1309.58	1164.28	895.595	655.227	742.266	955.683	1124.58	1303.83	981.604	1021.43	1066.92	1303.56	1267.43	1438.49	1062.07	1049.67	1180.19	616.288	1124.65	948.895	1206.7	979.742	1071.78	606.86	1380.08	956.036	1096.89	1145.85	705.185	1313.47	1086.52	1264.5	1095.74
ENSMUSG00000002660	594.71	431.681	437.856	248.337	312.257	378.849	370.754	430.723	468.449	553.273	411.111	540.577	522.514	513.641	518.271	445.481	536.574	295.882	538.389	418.677	532.886	394.519	492.143	258.307	488.367	420.939	485.957	473.004	294.103	526.785	404.96	519.739	447.099
ENSMUSG00000002661	47.2624	36.7825	48.7784	61.0371	78.856	55.4242	44.9099	59.07	67.4844	64.4196	57.6074	59.3244	56.219	55.2727	66.6165	64.5548	74.0903	92.7478	53.8957	75.6015	80.628	86.9293	55.5766	38.5921	34.5352	66.0237	48.2669	48.1694	42.2198	52.0804	46.6864	77.9689	67.0415
ENSMUSG00000002664	0	0	0	0	1.00851	0	0.992573	0	0.96805	0	0	0	0	0	0	0	0	0	0	0	0	0.98864	0	0	0	0	1.01096	0	0	0	0	0	0
ENSMUSG00000002668	335.626	433.982	588.65	2506.71	2431.08	1543.17	550.383	306.728	1545.54	167.987	714.547	380.932	377.426	328.439	331.57	700.7	399.702	2286	381.162	1517.48	379.909	2276.43	383.988	1607.99	229.182	1859.25	420.704	476.794	2196.01	229.463	443.003	386.61	673.861
ENSMUSG00000002679	272.686	193.524	182.627	143.281	201.374	193.301	227.743	175.17	215.214	315.974	194.132	260.098	191.422	190.961	180.682	196.002	212.261	193.036	248.231	204.466	266.995	240.696	173.541	179.013	178.869	247.184	199.062	189.353	198.804	250.89	206.626	242.454	261.032
ENSMUSG00000002688	17.7503	12.4063	26.2224	72.582	79.6725	45.4147	10.9183	12.2558	56.1469	7.48985	17.9314	17.9939	11.0037	24.5979	19.3845	26.2417	25.0891	125.278	27.1364	39.9535	19.9951	45.4774	24.6726	34.593	19.5478	72.7847	19.2083	17.7194	41.833	14.6812	20.8947	16.9605	20.1979
ENSMUSG00000002699	434.669	92.337	331.466	1847.14	2004.56	1652.21	981.182	287.267	1351.71	165.806	486.435	522.819	310.473	441.951	273.188	499.232	331.303	2275.74	533.818	1395.42	398.438	1704.18	193.918	1278.11	565.467	1607.4	455.151	571.409	1831.82	502.149	391.598	192.684	211.909
ENSMUSG00000002718	4450.78	2882.63	3298.28	1636.97	1144.08	2985.82	4563.32	2668.92	1593.54	1617.08	3580.43	6027.23	6300.45	4088.73	3366.82	3709.78	5064.76	1353.45	4916.32	2373.08	5246.24	1974.69	3729.35	1848.27	3464.03	2845.15	4519.23	4091.47	1626.71	4154.48	4995.93	2765.63	3327.77
ENSMUSG00000002728	532.295	746.643	424.296	271.166	423.979	476.286	681.766	661.475	549.81	1296.4	622.316	875.612	941.762	610.66	599.928	615.411	841.492	316.37	717.572	619.27	912.358	508.086	584.354	378.144	620.324	578.059	736.119	643.463	296.41	691.414	773.43	834.295	630.325
ENSMUSG00000002731	36.7859	44.1715	41.3847	159.014	176.819	82.8647	69.3195	36.8058	131	27.9398	39.0193	48.2612	39.5756	52.2597	30.1711	52.0862	44.6279	205.061	41.2411	124.821	40.0914	101.276	35.8946	145.123	31.2687	141.986	45.6241	38.3599	154.511	34.685	44.45	56.5474	56.5288
ENSMUSG00000002732	40.586	38.7839	31.5053	101.374	97.3268	59.3484	38.7232	37.7352	85.4505	68.2542	48.4985	53.5476	51.5853	65.8145	41.8743	56.7217	65.6909	111.97	58.4067	59.8333	54.8356	85.1331	24.8555	62.1545	69.8746	99.5537	45.2676	50.8897	78.1178	44.0285	33.2012	26.0899	47.9408
ENSMUSG00000002733	580.962	381.211	411.44	499.188	479.155	486.516	545.219	476.447	421.078	351.693	454.316	565.305	586.202	605.683	440.502	515.62	481.357	590.827	496.914	576.102	559.434	495.933	494.823	436.169	732.604	541.22	477.38	473.169	514.846	565.526	473.319	379.154	454.106
ENSMUSG00000002741	1475.3	1257.1	975.175	994.386	1090.89	1153.73	1327.36	1373.39	1331.37	1558.07	1037.37	1387.67	1318.06	1460.2	1091.36	1084.04	1329.92	1223.61	1315.35	1320.84	1307.97	1310.53	1183.53	911.581	1550.18	1321.45	1077.75	1135.62	1083.84	1311.84	1258.81	1434.88	1108.09
ENSMUSG00000002748	5197.77	4575.96	3585.2	2896.46	2946.1	3671.87	5236.47	4722.56	3954.91	1806.82	4424.93	5952.05	5965.92	5057.22	3788.31	4522.84	4713.19	3272.98	4942.06	4448.78	6024.42	3447.08	4638.18	3004.96	4057.12	4175.78	4407.46	4793.18	2996.52	5517.08	5760.41	5348.88	4855.25
ENSMUSG00000002763	349.041	418.929	584.833	692.247	797.619	537.55	386.729	308.954	848.455	135.022	489.808	614.141	489.923	364.755	498.875	582.419	450.806	727.883	454.882	802.069	612.126	728.322	573.801	527.212	214.462	679.505	718.418	478.507	604.698	376.441	441.933	537.274	525.996
ENSMUSG00000002767	689.97	497.349	608.203	242.967	420.018	504.724	614.514	562.801	520.39	767.222	588.062	596.398	734.662	674.11	799.584	705.554	799.411	272.788	686.194	541.724	892.939	324.505	626.399	238.694	750.112	478.392	743.04	634.329	405.387	692.71	690.574	734.254	716.211
ENSMUSG00000002768	384.854	394.952	258.151	349.183	414.964	360.546	350.107	325.032	443.795	604.814	266.658	347.975	368.034	382.719	334.487	294.256	347.423	412.248	342.841	460.333	333.946	454.52	329.411	318.813	346.783	407.356	281.27	332.167	367.797	382.841	326.242	384.464	303.977
ENSMUSG00000002769	1.62196	5.49378	6.58517	9.58758	9.94589	6.78534	5.71395	2.32593	8.91114	9.46751	2.1252	4.8744	1.64533	6.09995	3.35613	3.89541	2.12688	4.15432	4.13271	5.2166	4.23763	5.65325	8.42153	5.96284	8.20384	6.32759	4.15701	5.93894	4.72387	1.6098	6.83833	3.01519	5.81368
ENSMUSG00000002771	8.79442	12.2935	8.99446	19.7047	21.9855	16.6311	5.90124	14.0127	16.3072	2.78323	7.16865	12.8775	1.02829	6.82486	1.04877	4.1502	3.09499	15.0169	3.09958	14.8463	2.97195	19.593	12.7131	17.2728	8.71657	28.2643	8.10661	8.77911	20.7263	3.87939	6.13707	17.7399	8.00564
ENSMUSG00000002778	770.157	759.702	724.074	845.57	1084.39	871.433	887.256	771.282	1153.34	610.237	718.699	1008.7	934.449	842.865	795.992	875.395	840.867	1091.8	832.289	1151.19	991.6	1170.03	694.057	860.645	727.066	917.661	831.797	744.742	908.82	702.397	793.575	1012.99	808.607
ENSMUSG00000002781	359.439	166.15	65.9082	219.946	240.898	332.206	69.4227	108.708	340.646	98.4698	253.545	301.935	370.043	223.005	224.842	368.699	224.377	290.38	216.775	198.513	189.495	325.684	353.232	187.57	142.262	230.453	80.5038	58.3653	53.648	246.345	289.578	332.73	156.621
ENSMUSG00000002791	3.27351	2.62699	5.55251	1.65028	0.571682	4.35634	5.93013	9.97495	2.66476	2.57719	9.16918	11.0071	6.88411	11.3915	10.1187	6.94576	1.38127	2.24959	3.05148	2.93865	9.20201	1.92113	2.71666	3.56109	1.62227	1.35374	4.17434	5.4196	3.25557	1.6245	5.04973	5.1875	4.45616
ENSMUSG00000002797	150.095	108.997	126.112	211.566	257.905	173.175	200.659	129.452	214.942	133.876	171.112	174.833	213.812	160.377	170.063	196.523	191.307	180.195	188.491	186.273	222.783	193.602	159.707	139.397	122.122	186.233	159.524	138.986	138.498	170.266	164.863	124.397	187.968
ENSMUSG00000002799	59.2066	96.2923	73.1411	178.915	295.145	164.574	74.83	166.047	307.47	38.1863	83.488	33.2466	78.187	175.433	17.1858	215.806	56.1998	158.35	72.5357	140.581	76.0596	208.253	97.3441	47.9648	74.0705	112.485	17.9028	50.3228	231.611	139.785	18.4794	90.4378	55.4948
ENSMUSG00000002803	121.999	149.458	94.7744	211.46	230.332	170.166	126.806	121.553	200.312	80.9048	127.041	122.089	76.4436	102.396	78.6429	99.4278	99.4364	195.223	117.783	174.974	93.9442	219.058	93.2815	138.418	96.4974	229.886	83.56	137.912	201.418	94.1308	103.046	93.285	148.008
ENSMUSG00000002804	187.45	156.217	82.6511	120.506	205.709	94.1132	102.856	154.004	172.671	282.569	140.373	100.12	90.0002	139.887	105.83	135.438	100.114	167.345	107.241	165.846	106.495	196.934	164.304	103.951	113.714	80.3351	104.219	163.794	101.389	143.989	112.737	170.834	122.331
ENSMUSG00000002808	16.2642	33.1072	12.2566	108.141	61.1118	72.4852	25.8481	10.6387	57.9819	7.31431	12.9711	30.1707	7.81509	21.2677	12.3987	8.7612	26.1344	65.7749	22.6833	82.7838	39.2493	91.0471	13.707	58.3411	7.63584	83.9816	20.184	6.83617	56.199	16.1424	13.8192	9.81506	14.9029
ENSMUSG00000002812	1951.73	1787.72	1716.45	2326.46	3128.95	2315.23	1839.05	1792.69	2639.17	941.41	2031.59	1909.28	1362.63	1968.85	1786.07	1836.37	1757.52	2337.07	1805.51	2500.48	2111.86	2749.13	1730.72	2138.53	1593.33	2163.96	1371.22	1371.1	2437.4	1610.89	1487.08	1460.86	1605.09
ENSMUSG00000002814	420.559	356	294.136	359.46	292.981	314.17	386.034	429.226	395.949	368.973	429.342	490.882	446.46	382.723	392.395	376.852	445.852	339.703	404.188	358.484	437.479	426.343	403.116	282.556	490.664	462.572	381.61	415.092	366.941	429.43	479.3	415.229	397.056
ENSMUSG00000002820	274.124	306.988	239.933	333.272	371.033	394.948	244.396	250.254	430.518	245.35	312.646	286.296	214.488	308.519	314.335	241.33	341.902	380.84	330.048	538.709	394.134	434.059	322.507	284.16	271.923	349.346	275.473	304.394	386.21	283.639	241.839	410.114	268.366
ENSMUSG00000002825	566.657	413.59	439.418	194.94	299.7	300.104	467.788	485.645	408.136	453.679	428.65	516.379	452.435	543.57	449.597	419.082	520.895	187.036	491.843	405.538	514.315	323.728	507.099	215.44	450.059	316.345	473.321	450.791	293.206	538.809	431.364	485.954	446.352
ENSMUSG00000002831	790.872	773	637.412	3035.47	2687.64	1307.13	369.258	1286.86	1298.15	242.498	814.875	736.748	638.226	1431.58	624.391	1460.44	491.774	5715.22	1057.32	1203.59	1006.74	2021.73	1277.04	790.688	619.674	3170.99	529.766	839.699	750.005	691.965	930.293	907.383	1447.16
ENSMUSG00000002833	826.553	1001.71	1042.6	935.211	680.176	1101.29	900.624	1055.05	568.564	569.428	823.433	934.386	980.717	1053.19	1022.67	824.426	716.83	896.864	882.257	1121.32	1012.45	1023.82	739.472	625.861	906.98	1131.29	986.11	1083.86	962.025	838.468	867.982	1009.35	1074.77
ENSMUSG00000002835	1606.21	1659.29	1041.24	278.135	281.862	869.843	1471.22	1675.31	911.456	805.021	1349.27	1722.78	1921.6	1584.25	1006.64	1249.94	1341.32	86.0734	1204.5	1128.01	1798.18	720.273	1463.5	457.41	1188.73	1041.42	1468.58	1460.88	323.916	1540.48	1798.69	2062.54	1452.13
ENSMUSG00000002844	561.203	609.947	560.236	638.22	703.844	658.478	695.433	698.835	952.464	749.482	823.928	877.947	679.93	735.869	884.16	735.7	768.196	564.872	888.892	882.889	865.474	834.316	730.425	554.914	534.214	767.471	706.166	688.824	611.386	680.042	742.428	964.746	783.164
ENSMUSG00000002845	335.948	323.506	221.088	366.235	272.056	333.659	334.741	305.48	400.117	430.441	313.327	288.193	300.941	342.624	272.69	267.45	371.687	467.223	402.742	443.2	206.895	384.467	249.914	369.931	321.559	546.866	404.051	152.958	410.355	264.809	243.589	449.14	402.719
ENSMUSG00000002846	194.783	158.538	217.745	156.156	207.501	196.857	204.964	170.725	254.211	127.708	195.233	257.819	250.619	220.627	244.105	223.98	247.198	199.899	254.141	245.753	261.844	225.603	232.49	168.466	105.697	209.551	226.682	205.59	156.146	229.93	266.875	238.899	224.378
ENSMUSG00000002847	12.6784	25.2962	4.707	28.5051	28.9133	74.5336	6.61773	11.3141	10.9722	44.6684	47.9053	25.8931	24.9974	10.496	29.4748	4.03756	10.0365	42.4367	20.7729	53.2945	54.4651	61.0582	10.5279	54.5603	46.5271	85.3421	12.1326	11.1576	54.7715	53.8212	4.64366	38.3941	10.0998
ENSMUSG00000002870	4659.89	3881.55	2371.43	563.544	1272.72	2516.1	4772.2	4215.17	2207.62	2673.77	3827.45	4292.78	4073.87	4429.73	3992.9	3293.06	3373.19	550.593	2985.31	2440.34	3845.96	2303.72	3997.05	737.787	3886.31	2034.18	3746.09	4065.55	1513.35	4270.17	4457.07	4959.58	3336.7
ENSMUSG00000002871	594.17	380.925	350.522	383.675	563.202	492.36	352.526	350.748	714.724	230.887	390.644	386.159	311.495	508.119	300.924	535.738	426.825	713.667	465.643	517.568	396.085	535.673	169.554	436.238	379.176	654.782	455.47	407.18	599.519	402.065	316.48	479.765	450.046
ENSMUSG00000002881	709.011	583.539	534.586	778.474	855.544	600.477	888.91	699.917	969.685	623.638	690.141	639.842	1028.99	682.091	680.241	502.88	797.331	1226.26	736.068	926.706	839.098	822.385	548.085	893.102	781.156	688.079	628.508	651.426	692.885	625.664	722.693	770.662	639.847
ENSMUSG00000002885	1083.51	1232.34	738.77	3621.49	2797.56	3012.89	1415.14	1194.11	2638.56	585.957	1070.38	1164.64	922.848	672.492	556.164	1046.48	717.086	3683.83	714.475	2320.66	1087.47	3206.37	926.676	2268.17	1021.69	2812.75	866.498	982.433	2848.44	901.059	905.067	1162.11	940.679
ENSMUSG00000002897	3145.7	2700.79	1960.69	2499.55	2127.73	2756.3	2818.51	2683.66	2536.26	1673.35	2336.36	2738.04	2593.79	3131.12	1747.35	2123.91	2780.12	2804.84	2155.64	2458.11	2777.02	2560.87	2566.28	2048.63	2756.91	2610.43	2205.89	2773.13	2663.18	2358.51	2265.2	2993.85	2354.15
ENSMUSG00000002900	572.572	287.781	606.949	829.27	790.879	588.391	655.312	523.835	755.899	274.764	371.413	497.633	576.161	432.806	230.743	641.694	347.456	1047.78	488.011	1083.73	713.812	793.508	307.843	570.042	671.921	1070.32	416.178	497.871	389.221	442.554	299.353	606.633	537.978
ENSMUSG00000002908	6.89656	8.83653	2.7175	64.2056	13.0945	9.06527	1.33721	1.51309	58.1161	0	14.1987	19.8166	1.34769	9.35168	1.37448	2.7195	2.70409	45.4028	5.32446	27.2442	4.59545	13.7264	10.0026	80.8717	1.31675	12.1252	4.767	6.19339	31.0066	1.88618	2.68093	22.5319	5.58022
ENSMUSG00000002910	193.264	246.227	111.614	355.616	310.361	214.36	217.914	187.102	268.257	194.053	193.043	159.731	150.367	195.578	203.53	228.072	224.367	363.903	179.133	295.155	214.211	441.004	153.951	271.885	246.366	256.344	189.277	172.906	440.196	153.434	161.713	171.177	206.948
ENSMUSG00000002930	0	0	0	0	0	0	0	0	0	0	0	0	0	0	0	0	0	0	0	0	0	0	0	0	0	0	0	0	0	0	0	0	0
ENSMUSG00000002944	1485.53	1136.65	772.42	3674.23	3886.07	1618.86	1085.67	1502.65	2141.81	1088.93	708.999	929.801	1281.96	1398.88	1225.1	1507.38	712.339	7062.52	1776.47	1758.01	1328.51	3240.31	1530.68	1195.29	1649.71	4224.95	952.841	1073.49	1161.57	1534.69	1159.1	997.383	1573.7
ENSMUSG00000002948	1236.8	1235.93	1064.93	965.647	1565.81	1160.22	1207.91	1249.93	1365.87	802.593	1131.84	1303.29	1157.97	1430.3	1261.41	1355.04	1297.88	1316.81	1205.55	1457.22	1321.6	1423.67	879.149	890.828	1369.23	1311.59	995.572	1166.06	1070.74	1220.42	918.301	1471.86	1278.44
ENSMUSG00000002949	1264.96	1282.94	919.604	603.027	730.715	1002.27	1061.49	1305.64	1112.44	1011.98	1263.59	1500.63	1581.43	1212.65	1261.19	992.511	1375.67	600.901	1486.63	1148.22	1504.94	961.268	1071.87	610.088	1164.95	1078.69	1134.42	1164.46	602.01	1256.88	1417.69	1231.51	1274.69
ENSMUSG00000002957	982.311	833.338	825.331	1206.73	1222.85	1250.53	1056.47	914.557	1306.14	508.12	837.085	1215.11	990.315	1032.23	774.823	927.671	1097.67	1422.63	1021.06	1366.62	1115.45	1322.23	932.698	1153.28	980.135	1487.09	856.481	977.496	1270.38	882.003	937.609	1017.71	887.907
ENSMUSG00000002963	395.995	402.667	250.738	549.724	705.649	566.31	265.115	316.035	698.271	385.986	455.89	331.693	282.696	486.175	272.083	252.964	293.071	520.318	299.786	373.998	341.095	719.432	272.134	402.581	280.605	502.993	336.269	251.26	569.969	312.39	218.094	379.964	385.4
ENSMUSG00000002968	1007.71	1109.09	696.613	511.039	674.467	767.391	772.926	1069.17	1179.83	828.392	755.359	710.402	740.036	1220.79	822.468	835.997	933.484	658.127	815.905	781.432	897.555	698.08	803.8	424.096	963.834	751.976	801.816	814.539	611.459	868.457	724.86	1252.32	820.112
ENSMUSG00000002980	44.3712	65.4149	50.5194	501.304	553.765	152.406	229.293	123.242	545.972	109.239	126.157	126.835	50.6353	146.861	180.1	107.811	151.114	529.753	295.253	386.187	51.565	453.469	189.718	322.201	54.6274	515.389	104.749	120.197	523.397	53.1547	213.715	198.696	150.466
ENSMUSG00000002981	1970.72	1421.41	1045.63	1812.49	1555.36	1615.35	1772.81	1612.71	2203.45	1152.75	1303.21	1430.87	1515.31	1572.24	809.423	1438.88	1376.33	1595.61	1769.71	1617.95	1469.26	1690.68	1719.92	1834.76	1468.53	1713.25	1416.68	1414.72	1816.07	1272.96	1586.57	1493.08	725.491
ENSMUSG00000002983	164.955	207.945	320.279	1394.39	1404.24	929.672	298.515	227.515	1154.83	169.765	401.291	288.718	208.107	217.023	211.427	325.267	248.177	1993.16	253.082	1349.85	192.494	1295.94	242.469	1791.3	252.698	928.962	205.353	206.953	2074.04	170.53	198.491	343.059	326.943
ENSMUSG00000002984	1938.62	1627.42	1582.41	478.52	804.242	1131.99	1517.42	1855.47	1217.37	1549.78	1670.61	1856.86	1691.51	2210.28	1983.45	1647.98	1974.05	436.571	1800.2	1291.19	2017.93	966.807	1503.28	500.352	1786.48	1140.03	2062.98	1601.88	632.781	1927.53	1588.92	1812.5	1644.39
ENSMUSG00000002985	4533.75	4174.75	3998.13	24514.2	19252.9	15460.5	6201.88	4229.65	18942.8	3333.8	4701.59	4373.95	3290.68	4651.81	3720.46	4971.74	4107.96	32679.1	4740.09	21109	3341.56	23743.3	3530.82	19682.6	5103.02	20363.9	3270.27	3172.9	24306.2	4561.24	3237.44	3916.44	4716.84
ENSMUSG00000002992	13.4991	8.41808	10.6757	18.8455	16.1956	13.5148	15.9396	9.92725	14.271	17.7454	6.29394	8.81799	8.42684	8.28853	15.2834	16.0254	10.6229	15.9578	3.89663	13.873	8.42195	8.32831	6.23527	17.9869	28.1412	24.1609	6.38726	12.1568	14.6834	20.6124	0	20.1521	4.25368
ENSMUSG00000002996	563.574	530.328	464.774	979.706	961.563	820.132	495.722	655.671	837.405	706.914	496.372	452.99	606.147	525.321	344.181	477.101	510.388	1398.09	570.124	866.274	444.615	1244.91	479.785	837.806	746.737	1050.85	430.267	388.82	1040.8	520.374	488.313	486.617	451.215
ENSMUSG00000002997	520.29	462.842	627.68	818.259	713.286	622.946	615.38	453.523	776.049	349.659	617.951	860.044	940.456	508.353	798.027	772.313	720.662	1496.28	927.817	792.907	919.197	731.394	689.09	390.615	399.004	1192.12	786.875	628.404	286.497	554.915	808.754	472.888	905.588
ENSMUSG00000003031	817.773	549.267	722.479	1890.78	1596.05	1597.24	883.275	680.547	1159.71	613.614	946.387	1036.72	939.728	870.014	783.69	1053.75	1004.91	2373.02	933.937	1560.16	886.505	1606.59	761.92	1468.37	921.422	1751.45	890.727	818.282	1837.75	873.161	854.814	735.705	1012.22
ENSMUSG00000003032	107.007	60.1174	93.2335	213.373	211.172	121.805	62.9538	128.599	179.35	47.1791	56.259	60.798	42.5872	93.1798	39.8889	82.4298	119.16	222.959	117.506	148.398	54.7231	148.368	67.7391	201.071	172.748	209.776	92.5116	46.1857	276.741	81.4958	56.191	112.969	122.304
ENSMUSG00000003033	2129.39	2219.94	1549.01	1483.66	1618.92	2147.03	1998.47	2270.14	1933	1685.19	1791.03	2298.16	2143.26	1889.4	1601.99	1780.41	1931.59	1671.55	2125.77	1938.38	2095.81	2135.34	1987.22	1358.9	1839.62	2030.24	1847.76	2072.89	1470.22	1932.61	1803.19	2357.68	1844.43
ENSMUSG00000003037	1569.9	1775.05	1325.13	1829.89	1721.95	1549.22	1932.89	1888.17	1746.42	2061.2	1521.05	2232.39	1999.57	1775.32	1698.49	1422.83	2109.09	2168.91	1821.64	2352	1584.01	2154.45	1506.44	1435.81	1762.59	1832.46	1418.31	1437.4	1711.02	2014.55	1762.47	2186.78	1335.59
ENSMUSG00000003038	4772.95	4421.94	3659.95	1576.74	2434.45	3145.66	5082.31	4244.53	3330.06	7421.49	4522.73	5785.4	6293.61	4859.31	5386.76	3962.14	6026.69	1422.96	5901.42	3888.16	6118.54	2781.92	4493.99	1986.37	5730.46	3448.05	5196.11	4899.2	1778.88	4891.22	5454.15	4793.63	4887.18
ENSMUSG00000003039	1240.76	1027.02	1039.27	1137.48	1299.28	1321.15	1100.24	1130.08	1330.01	1067.02	1083.39	1462.45	1500.14	1165.02	1147.13	1287.96	1447.9	1606.48	1461.63	1464.23	1433	1248.18	1039.03	1346.36	1109.14	1421.68	1224.21	1018.38	1515.28	1201.84	1232.53	1284.98	1187.28
ENSMUSG00000003051	0	0	0	0.994285	2.01704	0	0	0.942763	0	0	0	0	0	0	0	0	0	0	1.00504	0	0	0	0	0	0	0	0	0	0	0	0	0.942273	0
ENSMUSG00000003053	0	0	0	0	0	0	0	0	0	0	0	0	0	0	0	0	0	0	0	0	0	0	0	0	0	0	0	0	0	0	0	0	0
ENSMUSG00000003062	209.295	171.025	225.627	247.464	267.167	224.508	219.187	166.764	257.245	261.207	213.406	287.162	315.309	232.857	262.155	242.804	263.315	351.542	267.389	239.782	248.074	259.382	197.957	265.614	181.473	251.632	223.579	147.59	271.263	270.851	229.191	209.802	203.354
ENSMUSG00000003068	1547.9	1538.56	1223.9	1245.43	1547.17	1394.83	1377.22	1543.41	1588.38	763.244	1487.49	1814.06	1462.23	1585.93	1480.46	1757.72	1608.14	1344.79	1676.25	1624.4	1599.92	1514.45	1404.65	1068.1	1418.51	1547.24	1447.67	1529.31	1266.97	1506.12	1542.79	1698.32	1542.85
ENSMUSG00000003070	2.95836	0.954322	5.04276	29.8282	34.2894	14.8091	5.95543	3.77103	21.2971	0.936267	8.9657	4.99834	3.00102	3.93568	0	7.06507	5.01782	42.433	6.03029	16.9803	1.99954	24.716	3.94761	37.5581	0.977395	10.8193	4.04382	4.92207	41.833	1.95746	5.96991	1.88448	4.03955
ENSMUSG00000003072	2015.65	2001.47	1697.31	1078.96	1513	1468.82	1698.66	1919.09	2065.08	2274.82	1860.85	2207.7	1727.67	2153.31	2273.69	1903.04	2205.07	1242.35	2194.29	2029.36	2167.54	1765.98	1873.1	1045.16	1983.43	1435.91	2123.32	1921.11	1231.62	1923.72	1686.14	2277.81	1944.43
ENSMUSG00000003099	2534.37	2303.58	1946.38	1075.76	1240.34	1606.64	1957.16	2418.56	1631.13	1870.97	1856.67	2796.52	2394.87	2445.66	2038.33	2220.46	2482.55	874.205	2188.58	1578.84	2489.44	1458.4	2031.25	1004.65	1879.92	1688.15	2271.05	2183.42	1047.33	2233.74	2257.79	2507.96	2073.95
ENSMUSG00000003119	1352.86	1371.47	908.06	1467.79	1371.17	1490.99	1358.83	1405.03	1428.6	428.446	1133.01	1620.02	1326.42	1334.66	717.41	1118.13	1177.24	1532.77	1172.78	1528	1223.29	1639.72	1066.99	1275.45	1550.44	1680.91	1080.68	1256.46	1297.68	1499.5	1304.77	1231.48	1043.55
ENSMUSG00000003123	713.941	586.734	587.316	1995.08	2085.39	994.533	341.415	728.133	1490.65	307.814	615.273	573.821	514.602	777.768	660.458	988.31	356.526	4478.44	945.424	1108.07	634.011	1768.94	737.314	670.553	467.288	2299.79	416.797	512.223	810.25	395.19	651.171	547.997	1082.99
ENSMUSG00000003131	1312.2	1250.05	779.262	711.354	892.711	989.268	1062.87	1583.16	1299.9	1993.18	989.697	1637.12	1328.18	1411.76	1004.97	1215.01	1173.72	1355.42	1276.32	1228.97	1251.19	1173.88	1108.15	962.034	1654.45	992.786	1051.47	1136.35	938.478	1446.78	1041.68	1732.54	1002.75
ENSMUSG00000003134	62.1766	41.9663	171.431	730.451	937.77	514.994	279.437	108.452	423.037	20.9456	176.851	173.829	127.563	130.892	168.246	182.585	106.483	1364.37	195.163	666.212	80.2804	659.762	88.2042	953.98	199.836	643.33	111.128	113.194	1132.99	79.108	132.926	124.258	172.356
ENSMUSG00000003135	711.001	487.097	607.228	439.216	437.359	423.527	673.663	455.289	392.838	359.727	628.039	999.897	910.468	726.554	814.956	671.623	822.307	591.406	772.245	562.756	768.375	509.298	480.457	454.532	743.264	552.621	711.269	557.747	518.729	562.656	666.07	423.113	740.763
ENSMUSG00000003153	955.319	778.057	392.864	639.136	401.126	455.54	569.741	882.184	699.844	492.281	534.315	654.216	724.786	548.758	416.937	664.544	651.522	627.778	736.102	559.463	526.636	833.362	593.612	638.746	551.82	762.848	629.189	704.177	519.047	657.548	577.024	785.32	370.593
ENSMUSG00000003154	208.03	303.046	229.416	1028.85	767.801	672.368	334.049	323.178	854.858	115.303	340.399	286.491	221.205	303.555	163.126	303.222	259.369	963.743	381.462	684.759	302.313	987.127	449.297	645.788	431.32	672.571	255.651	304.527	989.773	225.928	241.74	385.993	335.254
ENSMUSG00000003161	733.267	828.489	691.33	1551.06	1716.86	1324.12	888.23	827.673	1761.2	1118.89	833.446	1068.07	999.646	852.497	899.99	890.374	953.899	1790.76	1019.02	1673.15	1066.19	1786.89	694.249	1234.78	798.355	1508.3	868.249	704.552	1585.12	867.852	841.194	912.16	908.319
ENSMUSG00000003166	1641.3	1766.88	990.978	1148.57	1024.37	1272.19	1475.5	1579.5	1403.35	831.457	1126.83	1727.87	1381.07	1685.73	957.468	1063.16	1340.29	1523.28	1179.83	1321.17	1242.36	1342.96	1401.41	1022.99	1379.26	1426.27	1154.83	1263.86	1087.51	1402.58	1340.16	1742.01	1232.66
ENSMUSG00000003184	1014.11	1014.17	882.565	1307.83	1501.02	1171.99	880.118	1095.31	1414.57	818.948	991.902	1059.8	790.104	1041.12	880.962	1035.99	864.437	1405.55	920.026	1428.68	906.792	1513.09	928.82	1036.1	827.323	1292.91	976.488	901.285	1269.19	827.387	789.729	1305.31	957.222
ENSMUSG00000003190	388.422	353.458	316.529	209.294	255.401	281.374	344.933	320.523	324.657	296.497	316.296	349.632	343.277	444.444	326.5	353.187	336.539	209.89	349.695	305.705	333.436	243.965	387.08	195.457	325.395	311.286	340.485	383.217	222.319	428.788	282.965	492.745	362.203
ENSMUSG00000003198	188.547	174.489	120.568	231.529	223.31	202.002	201.283	148.706	139.688	143.725	124.753	227.561	251.148	204.042	173.021	162.754	227.101	300.583	223.174	266.513	202.884	212.733	169.141	181.338	164.394	216.427	196.433	177.563	215.9	176.399	235.179	130.632	172.815
ENSMUSG00000003199	484.803	396.851	351.735	626.329	856.806	652.467	448.648	394.326	797.746	336.866	386.886	417.402	428.434	471.965	400.43	402.164	454.192	644.848	419.939	766.216	442.729	699.651	436.625	417.717	435.292	637.552	437.967	488.126	584.713	524.969	370.087	565.59	543.531
ENSMUSG00000003200	582.489	574.24	553.61	904.267	960.603	903.486	598.982	574.251	986.836	442.431	541.909	675.132	531.548	692.38	514.409	607.423	617.097	946.529	567.221	875.455	580.089	927.762	551.085	839.221	588.375	920.608	529.124	552.025	1004.08	534.579	547.429	699.7	572.081
ENSMUSG00000003206	24.6532	24.8125	28.2395	134.227	148.251	99.7149	42.6806	23.5689	92.9329	18.7247	33.8704	16.9943	16.0054	21.6462	12.2429	29.2697	25.0891	147.505	19.096	73.914	20.9949	121.603	19.7381	103.779	10.7513	94.4233	23.2521	16.735	138.447	22.5111	18.9047	19.7873	30.2968
ENSMUSG00000003208	244.14	225.069	173.465	192.137	196.03	233.954	193.483	209.82	220.04	178.447	211.716	224.936	222.7	257.641	235.628	191.101	221.358	195.299	212.346	212.637	202.109	233.949	190.432	162.365	212.55	226.856	248.226	187.925	174.382	200.622	191.664	247.108	199.03
ENSMUSG00000003226	4854.95	3716.02	3397.12	3811.3	3445.28	4595.03	5258.01	3830.39	3277	1533.21	4309.37	6390.23	6050.68	4751.97	3332.77	4131.3	4837.67	4292.54	4661.34	4505.36	5381.33	4418.02	4382.56	3554.59	4500	4909.17	4024.8	4551.47	3629.96	4689.07	5282.06	3517.09	4173.21
ENSMUSG00000003227	0	1.90865	0	2.98282	2.01701	3.94907	0	0	2.90418	1.87249	0	0.9997	0	0.983923	0	3.02785	0	5.05152	1.00509	1.99765	0	5.9318	0	0.988355	0	1.96714	0	0	1.99207	0	0	0	0
ENSMUSG00000003228	101.571	107.839	78.6672	246.911	243.852	206.341	133.005	120.673	202.323	63.6639	96.6304	105.964	102.034	121.022	59.1739	121.116	91.5515	371.793	103.52	187.781	107.974	279.785	97.7036	243.139	103.603	323.597	71.7783	98.4411	251.758	92.0018	93.5286	107.417	94.9301
ENSMUSG00000003233	589.095	509.343	318.81	561.711	592.21	565.132	502.192	556.215	601.591	181.821	416.037	466.675	327.467	676.945	261.188	483.783	370.88	650.378	419.912	564.855	413.87	561.254	425.85	530.921	508.269	653.906	337.775	455.568	600.721	562.765	390.344	516.469	405.033
ENSMUSG00000003234	717.202	640.398	590.236	630.822	874.602	948.967	590.444	505.761	788.641	434.423	653.361	552.823	536.985	842.523	633.892	518.969	522.994	816.874	690.757	708.486	635.37	784.921	537.813	665.459	639.82	718.553	508.096	669.223	974.613	768.84	548.938	642.38	487.048
ENSMUSG00000003235	1864.61	1501.06	1595.46	714.72	1187.8	1221.38	1558.99	1718.15	1419.68	1566.97	1476.81	1854.17	2147.7	1873.63	1778.79	1536.38	1797.5	893.727	2034.63	1637.63	2000.61	1306.62	1430.63	780.051	1528.56	1364.77	1802.91	1466.99	796.315	1614.58	1779.96	1844.37	1657.99
ENSMUSG00000003269	293.331	322.216	308.364	367.083	478.755	400.831	306.838	341.85	428.237	322.389	297.961	335.24	330.791	366.109	298.957	275.9	289.888	514.997	418.796	457.585	354.699	418.787	332.382	336.951	346.047	414.456	363.821	326.794	425.613	330.384	307.241	425.215	358.103
ENSMUSG00000003271	1.42321	7.38747	8.7797	5.73992	15.9075	3.56219	0	1.09036	19.9204	7.3731	8.02301	5.04964	17.0428	1.34995	26.2586	6.41031	5.50582	9.41456	8.04781	16.2773	26.204	12.849	0.71217	7.84088	1.41061	10.3579	13.7031	0.882144	5.75001	3.23176	1.68501	5.84941	3.39246
ENSMUSG00000003273	0.851282	2.18288	21.2171	86.1285	48.6832	8.2493	3.9513	1.83216	19.5306	0	19.2371	0.885573	1.9911	3.10244	0.88074	22.8557	1.71761	6.00673	3.73582	11.6682	19.3059	100.009	56.1315	19.3918	20.1015	80.2141	17.1267	1.9594	11.8983	0.844918	20.1397	57.8434	19.6283
ENSMUSG00000003279	0	0	1.70092	1.31842	0	0.832533	0	0.39443	2.73458	0	0.802088	0	1.4129	0	0.860332	10.7203	0	0	1.33273	1.32448	0.418243	0.833683	2.78779	0	1.38047	1.38922	0	0	0	0	0.937711	1.33085	0
ENSMUSG00000003282	10.4495	6.89973	20.976	16.9257	20.5758	12.8411	40	25.3264	17.5757	19.9169	8.00263	15.2581	5.62519	5.53284	5.07389	6.64115	4.83715	36.5724	23.6266	10.5939	7.39668	21.595	12.3458	37.8511	8.78656	23.8548	4.87282	8.84971	41.192	62.0131	4.7958	29.8824	7.3015
ENSMUSG00000003283	176.316	150.801	200.938	621.566	492.668	625.015	269.697	181.262	489.749	171.764	239.004	222.5	237.729	174.438	204.47	215.892	198.514	704.883	189.806	410.948	222.091	500.106	213.615	576.063	254.609	460.872	176.31	153.314	574.859	195.211	168.73	222.384	262.727
ENSMUSG00000003299	913.376	1120.63	751.644	535.511	719.678	617.138	783.378	1141.53	1170.96	1309.37	836.328	1108.57	967.278	1136.77	968.127	912.305	1274.5	560.446	776.722	1152.44	1036.07	813.025	1189.4	468.158	829.247	694.418	835.466	855.061	531.1	821.197	747.29	1335.88	937.379
ENSMUSG00000003308	1125.18	1073.53	935.52	960.812	1024.38	1209.12	1003.67	1033.66	1320.15	637.78	913.877	1099.11	1247.67	1009.42	1005.6	958.613	1094.11	1094.49	868.348	1126.21	977.541	1329.6	1382.69	1051.63	1097.1	1104.97	1218.07	1232.02	1278.28	966.816	1010.05	1207.27	1058.25
ENSMUSG00000003309	81.3594	85.788	27.5016	72.542	53.4418	32.9344	72.1534	44.7612	49.4796	70.0154	31.4971	70.88	48.8678	76.1319	54.9747	37.7747	41.8723	45.4639	33.8017	75.2194	61.1155	42.6496	57.885	22.8933	46.5699	64.4582	40.7761	50.657	36.1782	93.6868	38.4835	65.2159	89.8105
ENSMUSG00000003316	2051.44	1885.24	1406.14	2384.86	1932.03	2425.34	2093.33	2206.84	2352.32	873.75	1747.53	2182.72	1861.33	2124.68	1171.72	1541.99	1684.06	2324.2	1614.49	2188.42	1884.58	2316.29	1739.86	2162.42	2096.82	2714.12	1618.75	1920.93	2223.34	1836.33	1809.98	2249.54	1712.62
ENSMUSG00000003341	0.800194	1.54883	0.953312	0.939811	0	0.933206	0	0	0.91507	0.884933	1.8833	0	0	0	0	1.90804	2.84576	0.954998	2.85	0	0	2.40686	0	0	1.84777	0	0.955612	0	0	1.58853	0.940457	11.5752	0
ENSMUSG00000003344	229.47	256.35	215.773	475.431	514.374	432.434	208.403	188.485	450.852	134.975	203.042	196.201	127.572	248.655	136.437	196.961	179.591	446.464	178.826	346.108	181.52	559.791	232.04	350.181	104.761	503.565	217.872	218.88	511.326	195.306	150.648	292.631	260.277
ENSMUSG00000003345	1947.26	1901.19	1606.83	1919.18	2195.02	2020.78	1781.17	1730.55	2462.48	1370.33	1645.97	1855.32	2125.99	2169.47	1657.22	1933.11	1908.54	1977.51	1749.7	2355.21	2109.31	2226.56	2037.93	1615.36	2133.14	2235.42	1953.33	1969.97	1997.28	1843.37	1806.61	1955.21	1784.77
ENSMUSG00000003346	787.612	872.803	702.605	729.556	1000.15	739.31	720.769	775.348	1015.9	862.3	921.838	822.951	760.424	942.788	953.401	836.165	845.892	768.2	938.232	1078.65	861.804	943.359	780.767	636.023	763.389	715.935	854.788	835.932	819.758	739.998	710.684	986.777	877.756
ENSMUSG00000003348	604.478	543.771	546.1	2335.78	1974.03	1921.6	568.935	640.173	1618.4	468.094	830.73	677.152	589.37	545.146	447.352	684.555	735.724	2783.47	636.462	1749.72	646.437	2275.69	467.448	2154.58	440.276	2112.38	538.287	722.336	2277.37	471.381	864.99	820.108	696.875
ENSMUSG00000003352	23.9736	62.2467	170.071	2054.61	2112.34	1025.49	305.253	85.2492	1492.97	24.1383	393.937	178.856	105.115	56.2386	168.523	313.255	74.3108	3096.36	94.9704	1945.5	101.578	1663.6	141.924	3097.94	70.2822	1595.55	229.972	54.7915	4139.18	113.001	141.445	126.336	327.03
ENSMUSG00000003354	0	0	1.00856	0	1.0085	0	0	0	0	0	0	0	0	0	0	0	0	1.01032	0	0	0	0	0.986907	0	0	0	1.01096	0	0	0	0.994996	0.942266	0
ENSMUSG00000003355	177.168	194.311	159.449	36.8034	74.2903	91.4542	234.941	234.429	145.23	429.183	157.089	235.56	234.239	150.128	227.115	179.587	221.471	26.0701	228.121	211.918	199.076	111.946	204.886	64.4991	177.259	113.33	229.438	210.287	35.4327	212.796	196.132	214.25	180.638
ENSMUSG00000003360	1897.75	2660.25	1822.05	1335.95	1548.13	1745.64	1943.72	2770.72	2289.79	1405.55	1888.26	2837.42	2379.35	2277.89	1713.99	1925.49	2263.77	1492.22	2192.85	2069.83	2340.1	1822.29	1862.11	1250.42	2014.08	1881.78	2063.11	2031.99	1428.47	2033.47	2414.83	3151.91	1902.94
ENSMUSG00000003363	886.912	795.198	619.298	1224.3	1486.11	1080.19	1207.95	803.961	1657.85	568.255	595.956	919.637	563.676	856.029	442.127	806.454	746.24	1611.22	857.366	1786.74	634.467	1468.73	636.649	1254.87	562.451	1466.52	664.196	688.948	1390.07	896.733	468.032	941.168	469.886
ENSMUSG00000003378	31.8825	39.1085	56.9911	129.334	172.671	91.7548	40.4194	65.542	161.723	21.3177	49.8351	35.905	23.5413	49.8482	46.1649	100.727	43.6033	141.38	39.5744	84.0815	39.949	116.829	60.1649	84.636	70.5331	99.1088	40.0404	31.0433	108.471	48.5116	46.6771	49.9722	31.1907
ENSMUSG00000003379	9375.04	8853.27	8747.2	8544.66	9326.33	8711.37	9594.43	8343.53	9872.16	7247.11	8887.39	10322.7	9178.97	8389.68	9112.04	9288.72	9937.22	10291.4	10056.7	9918.9	10142.9	9885.47	7844.59	6897.58	9617.27	8626.21	9473.82	7970.31	7485.54	8219.59	8252.04	9831.96	9011.83
ENSMUSG00000003380	453.302	425.368	397.745	804.827	1143.91	707.293	349.01	435.029	999.594	597.161	439.555	455.041	325.946	501.631	451.468	500.137	491.441	1057.33	436.364	907.175	415.902	990.999	409.526	664.679	444.553	697.349	427.153	364.175	880.817	399.519	343.325	527.147	427.269
ENSMUSG00000003382	788.201	814.639	781.762	2458.21	2432.59	1833.59	1016.75	807.843	1932.84	452.781	950.361	1050.56	850.797	875.483	582.45	960.583	883.47	3674.67	877.662	2424.9	891.784	2262.8	735.791	3363.39	875.81	2048.7	676.896	761.623	3572.24	719.794	849.598	879.224	880.299
ENSMUSG00000003402	1396.81	1079.76	1066.6	826.768	939.063	1178.6	1255.87	1223.29	1251.99	909.091	1087.29	1440.48	1177.64	1380.08	1152.65	1143.84	1323.47	920.448	1273.75	1255.11	1316.98	1108.8	1298.03	838.732	1295.59	1123.75	1177.33	1203.03	1087.64	1436.52	1200.17	1353.55	1171.72
ENSMUSG00000003410	0	0	0.937304	0.924001	0	0	0	0	0	0	0	0	0.929732	0	0	0.937972	0	0	1.5964	0	0	0	0	0	0	0	0	0	0	0	0	1.75135	0.938542
ENSMUSG00000003411	2.20663	3.2725	0	0	2.25673	4.50599	5.70063	5.11493	1.08309	0	2.22915	1.11847	5.59609	23.9362	7.99041	3.461	2.27184	0	2.249	2.23507	4.47427	0	2.23413	4.85841	15.422	3.30141	5.65553	1.10141	0	5.57022	2.22646	0.550758	2.25983
ENSMUSG00000003418	21.2054	60.1784	92.66	597.904	348.593	412.641	153.223	84.1668	440.075	60.8368	171.675	138.125	64.9765	69.8136	27.7463	147.513	122.992	507.9	123.408	503.512	42.9968	537.792	49.479	355.748	32.7625	419.516	46.0363	75.7293	394.746	45.0157	84.879	147.33	72.1752
ENSMUSG00000003420	268.466	166.973	173.939	957.402	742.159	484.75	243.343	245.866	626.308	167.281	262.503	172.932	195.19	195.219	180.154	267.289	204.939	1223.52	326.206	661.763	178.22	657.298	204.712	507.583	170.687	780.852	140.731	165.066	659.114	231.635	164.152	191.158	243.46
ENSMUSG00000003421	769.044	802.594	644.137	520.105	722.096	771.833	691.483	893.534	785.872	871.546	709.889	708.875	761.055	984.242	635.017	769.385	702.722	590.949	686.699	744.643	710.825	870.84	574.234	473.552	841.998	723.792	667.826	770.899	666.883	668.019	736.753	867.403	745.808
ENSMUSG00000003423	455.385	510.619	413.884	320.978	436.553	443.392	381.842	458.884	481.653	564.128	425.608	573.716	523.355	481.584	540.106	447.3	534.229	300.319	594.711	470.245	611.231	597.713	500.234	372.287	483.799	547.301	582.616	505.489	289.683	634.02	434.945	642.709	383.913
ENSMUSG00000003429	19129.8	16955.7	13032.1	9972.01	12559.9	12795.4	15356.1	18111	15007.1	34877.8	13695.4	17749.8	18461.5	17174.7	17684.2	14976.4	18995.8	12262.9	17861.1	16880	17464.4	14240.6	15860.2	9318.88	18627.7	12532	17015.7	15581	11600.1	18074	15674.8	17195.2	15179.7
ENSMUSG00000003435	2881.12	2518.98	2066.8	3267.19	2495.04	3637.16	2158.34	2863.07	3029.84	1659.09	2861.55	2994.23	2663.61	2795.65	1684.74	2535.36	2273.39	2902.66	2230	3229.64	2724.36	2807.29	2312.26	2233.59	2244.96	3218.68	2730.02	2906.67	2931.81	2982.8	1975.91	3412.91	2493.01
ENSMUSG00000003436	3.06364	3.37679	0.626672	0	0	2.39808	0.616714	1.17157	1.20299	0	0	0.621152	7.07917	0	0	0.627134	0	0	3.55625	0.620623	3.53751	0	2.39719	0	0	0	3.57716	1.22332	0	2.43256	0.618241	4.57745	0.627494
ENSMUSG00000003437	990.44	910.3	680.932	860.859	971.284	1104.58	958.086	1066.46	1075.15	633.505	862.733	1062.49	884.196	934.893	731.038	986.172	903.599	897.352	934.43	1214.85	1020.53	1115.53	866.34	722.326	784.268	1159.88	845.693	845.097	861.114	875.64	915.121	1046.13	985.279
ENSMUSG00000003438	1233.84	963.563	1036.41	407.711	607.154	762.285	994.577	1033.71	935.01	1358.36	1140.21	1201.89	1178.17	1247.22	1416.6	1093.19	1378.19	370.434	1177.93	1001.84	1091.79	827.638	1183.86	512.969	1006.01	736.822	1216.16	1140.54	553.588	1233.57	1109.62	1245.54	1259.3
ENSMUSG00000003444	274.144	196.591	226.924	126.273	169.43	190.544	194.544	166.868	191.674	205.035	199.238	270.909	214.072	257.786	237.716	191.767	237.845	143.464	211.061	194.773	207.949	198.717	225.014	140.349	189.614	204.584	215.335	206.726	155.38	199.664	195.017	217.66	214.098
ENSMUSG00000003452	31.6375	18.8139	23.3839	58.1122	128.461	22.7258	38.0054	37.3428	122.446	26.5297	31.0334	23.881	24.1797	123.184	14.854	24.5642	18.4045	37.2581	16.3196	41.8592	35.2328	63.1078	78.5229	81.0179	47.8577	25.0398	77.0315	40.1659	89.1098	165.244	84.814	106.746	22.2843
ENSMUSG00000003458	1109.98	971.958	1106.13	1404.68	1565.97	1436.61	1225.12	1091.24	1436.43	710.426	1317.86	1308.79	1146.19	1196.93	1075.4	1408.13	1070.53	1658.66	1037.49	1535.61	1246.39	1585.46	1047.29	1215.97	1530.8	1543.92	1223.14	905.758	1521.9	1051.25	1054.59	1239.99	1388.85
ENSMUSG00000003464	682.973	686.264	706.379	766.303	806.952	693.029	610.435	735.639	887.114	676.674	782.937	782.282	802.795	707.771	737.424	753.368	756.799	921.964	893.426	772.979	874.587	799.098	581.579	448.368	844.949	995.551	690.883	700.986	808.104	725.581	739.724	699.102	790.591
ENSMUSG00000003469	0.920152	0.890452	0	1.85548	3.76411	0.921185	0.926122	0	0	0	0.929519	0	24.0368	0.918055	0.951997	0.941736	0	3.77079	3.75116	0.931992	3.73139	0	0	2.76669	0.911976	2.75324	1.88664	0	0	0.913219	0	0	0
ENSMUSG00000003476	2.56978	7.70097	0.799326	0	0	1.38281	0.576342	0.747195	3.67603	0	0	0	0	1.18124	0	0.799899	0.795354	0	0	1.15992	1.16099	0	7.86236	0	0	3.89764	1.76101	0	2.89165	1.37084	8.02906	0.547106	1.4145
ENSMUSG00000003477	67.2166	67.2064	13.9987	549.406	186.102	110.282	39.0939	55.0016	96.1355	19.2633	18.7653	30.7238	16.8599	76.3629	18.2069	35.0225	20.8941	278.188	44.2459	188.078	14.8678	255.885	33.599	192.838	51.6254	341.138	9.02065	33.477	428.082	34.9326	15.0974	32.9659	20.0247
ENSMUSG00000003484	1120.83	771.948	714.367	543.612	889.827	435.31	924.572	984.835	498.282	855.632	718.236	767.343	602.69	895.029	882.878	851.22	867.433	902.983	798.864	520.997	758.912	567.908	664.345	426.383	1005.75	444.125	805.91	642.442	578.663	786.254	565.369	799.848	709.148
ENSMUSG00000003500	769.795	676.95	553.783	855.15	910.752	795.003	695.795	786.297	840.205	445.37	554.542	766.631	454.819	717.967	452.456	597.616	600.423	804.608	803.628	725.337	671.026	1071.7	550.117	792.137	535.427	857.205	572.574	679.97	1100.97	727.673	546.442	656.064	609.227
ENSMUSG00000003505	0	0	0	0	0	0	0	0	0	0	0	0	0	0	0	0	0	0	0	0	0	0	0	0	0	0	0	0	0	0	0	0	0
ENSMUSG00000003518	709.381	679.14	369.469	673.704	572.905	713.719	663.676	774.159	661.091	1033.54	359.611	642.946	477.779	870.604	279.264	707.094	606.487	552.424	604.266	677.795	604.524	684.103	640.016	601.353	861.704	793.938	318.662	497.379	469.811	832.045	400.677	834.51	560.816
ENSMUSG00000003526	804.294	485.511	405.307	152.409	128.982	211.631	367.297	662.22	214.273	364.301	369.967	644.07	491.506	732.215	440.091	493.761	510.257	127.997	620.55	248.31	606.741	191.412	422.037	89.3111	558.804	418.367	549.765	633.416	155.443	869.192	509.503	537.343	409.084
ENSMUSG00000003527	455.598	368.145	318.41	447.416	499.11	411.196	332.792	536.881	570.377	437.058	265.298	420.216	353.433	417.135	306.957	362.324	321.477	334.931	359.458	377.464	319.201	486.108	401.301	352.444	469.978	493.564	387.599	389.664	453.074	411.576	343.483	389.49	352.121
ENSMUSG00000003528	578.994	486.129	442.107	683.68	826.318	552.758	379.928	459.956	1315.33	588.242	405.474	446.365	483.538	501.422	422.907	401.853	421.082	1800.6	479.543	756.559	503.469	1111.72	494.453	465.393	463.479	1264.46	437.887	504.791	414.277	483.589	480.52	598.581	554.098
ENSMUSG00000003531	297.163	212.127	250.227	177.543	218.333	214.698	197.359	275.23	246.448	404.337	202.36	308.822	348.837	315.582	399.865	362.348	311.622	180.609	366.295	296.519	365.19	230.172	238.635	121.54	346.609	225.489	307.367	256.666	141.174	355.242	292.704	256.732	296.039
ENSMUSG00000003534	62.0778	78.0395	49.7307	278.263	247.021	187.582	81.9133	37.1378	175.007	23.6733	71.0949	83.4443	68.8734	57.8787	41.0637	110.335	51.5649	301.829	49.0593	219.14	48.8008	236.525	44.7929	183.797	33.48	187.796	41.6422	54.0689	213.851	42.7461	50.1746	94.99	79.0202
ENSMUSG00000003541	31.5561	28.6298	41.3507	59.6565	94.8002	30.6056	18.8589	77.3061	52.2747	50.5567	48.8133	50.9828	28.0094	52.1476	43.8703	43.3998	43.1533	110.124	59.2981	232.729	19.9951	62.2843	33.5548	58.3139	177.885	44.2609	23.2521	28.5479	67.7297	148.769	28.8545	46.1704	30.2968
ENSMUSG00000003545	86.4178	29.7411	17.3384	21.1733	51.3137	27.7231	28.6752	124.127	14.3514	34.5927	13.6007	21.2881	8.5012	36.2474	24.5788	16.5734	19.7725	23.2081	11.566	54.5723	23.5519	41.0578	24.3667	16.5629	114.523	41.5877	8.90728	25.2291	17.7882	42.698	11.838	12.8275	11.6217
ENSMUSG00000003546	112.807	115.872	84.7136	211.589	244.098	194.679	93.2173	124.441	225.352	90.7325	114.558	97.8784	109.937	140.11	103.97	132.098	137.452	266.48	123.677	250.481	112.87	221.255	101.559	159.971	105.922	200.468	112.115	92.854	219.922	75.3904	92.4499	128.03	113.006
ENSMUSG00000003549	247.467	196.637	225.627	209.085	250.848	216.968	236.992	271.843	272.796	240.498	291.664	330.67	227.391	277.389	290.964	260.301	277.108	236.639	242.429	275.667	264.298	276.921	201.977	129.65	222.727	219.008	285.757	201.561	219.103	232.627	213.191	282.81	229.949
ENSMUSG00000003555	0	0	0	0	0	2.81955	0	0.550172	0	0	2.84501	0	0	0.574205	0	0	0	0.589603	0	0	0.583443	0.576951	0	0	0	7.02248	0	0	0	0.571177	0	0	0
ENSMUSG00000003559	39.4452	60.1226	343.917	216.752	200.694	202.392	76.4281	56.5654	213.939	44.003	368.59	469.842	514.173	58.0511	492.776	390.598	497.768	245.505	416.092	237.723	425.896	270.887	57.2405	179.884	50.8243	269.5	467.065	41.3453	188.249	30.341	386.054	66.8999	385.78
ENSMUSG00000003573	67.9978	78.6949	51.6121	147.842	107.569	143.353	61.2307	73.1094	120.187	43.4886	77.5226	47.6859	50.2235	83.0759	73.0258	68.6957	44.6114	101.856	64.511	108.41	42.1722	131.573	84.3362	112.119	34.9534	138.279	68.0287	65.6622	156.498	48.2661	100.078	98.9893	61.8196
ENSMUSG00000003575	428.232	352.549	188.135	642.444	278.95	428.104	311.833	289.19	571.831	300	236.043	258.215	275.306	300.605	224.905	310.777	199.336	358.827	236.205	387.556	285.474	582.909	262.426	342.833	214.335	366.019	228.301	261.539	461.34	344.47	312.853	472.083	214.635
ENSMUSG00000003581	110.055	137.932	119.392	297.608	360.474	258.69	132.719	157.378	300.675	108.658	158.905	97.9122	111.731	172.599	109.262	130.642	96.8774	354.603	120.105	239.996	111.384	325.846	148.969	231.598	130.417	309.537	99.9589	100.125	324.55	113.305	120.443	187.608	136.974
ENSMUSG00000003585	15.3299	5.0472	4.56236	17.991	14.4468	20.7704	5.58205	2.84314	26.7107	6.64597	10.3459	5.27581	6.03354	5.1927	1.53842	8.37047	15.2557	15.996	9.09302	15.8314	13.9828	10.4353	22.0538	13.2931	2.21071	18.5607	5.33547	14.2752	10.5132	12.8874	3.00064	20.9003	8.49616
ENSMUSG00000003604	449.95	370.68	338.765	240.774	324.691	356.688	427.397	374.696	363.421	311.299	357.286	486.435	492.204	438.975	442.677	372.58	542.559	180.291	479.526	394.851	538.943	347.693	406.191	205.824	335.162	346.296	437.141	403.029	268.756	431.547	383.088	450.071	425.571
ENSMUSG00000003617	446.273	485.628	369.168	1851.95	1336.94	1057.34	778.614	433.396	1071	315.402	397.597	532.084	507.051	527.83	259.433	467.323	320.75	2088.57	446.576	1444.78	488.102	1443.86	344.758	1499.68	785.522	1596.12	346.712	282.409	1788.27	496.625	338.025	396.956	448.679
ENSMUSG00000003623	386.674	284.898	247.497	599.793	550.121	448.209	423.897	366.254	449.748	349.544	288.878	316.136	392.19	358.611	262.413	317.659	340.707	732.503	345.921	478.138	344.526	622.561	323.149	441.366	366.028	556.558	298.924	339.541	544.595	334.912	368.06	311.128	333.527
ENSMUSG00000003644	1399.35	1362.38	952.645	1726.07	1517.05	1266.95	1407.41	1649.91	2120.31	1058.68	1154.47	1445.99	1363.77	1584.77	1030.2	1027.1	1186.03	1542.67	1366.1	1671.51	1246.84	1880.17	1369.82	1179.51	1167.47	1344.25	1340.92	1419.15	1639.43	1310.89	1192.7	1716.68	1201.1
ENSMUSG00000003657	1.18275	1.14462	0	0	1.20959	0	0	0	0	1.12291	0.839998	0	0	0	2.44732	0	0	0.851923	0.847475	0.842227	0	0.833643	0	1.18545	0	1.65875	0	0	0	0	0	0	0
ENSMUSG00000003660	4538.21	3510.5	3790.43	4161.23	2802.7	4545.03	4474.83	3609.47	3490.28	1795.39	4171.11	5558.36	5989.98	4591.34	4042.56	4167.55	5583.03	3622.61	4987.01	3831.81	5290.02	3801.41	3757.44	2551.79	4357.46	4628.44	4925.52	3787.53	3527.3	3974.58	4983.84	4303.98	4443.27
ENSMUSG00000003662	567.614	459.573	403.62	474.527	584.153	567.804	515.697	537.542	724.06	505.037	488.109	524.511	553.183	590.95	573.96	448.16	490.376	586.431	571.245	716.408	509.164	577.757	564.45	333.752	363.467	647.668	444.616	555.561	431.692	572.376	481.323	630.342	430.319
ENSMUSG00000003665	0.989006	0	5.05745	0.997177	0	0	0.99548	3.78202	0	0	4.99543	6.01544	3.00975	0	2.04642	5.06121	9.58494	0	2.01597	4.00697	0	0	0	0.991246	0	1.97288	0	0	0	1.96318	0	7.55997	0
ENSMUSG00000003680	401.934	415.238	665.5	411.604	478.343	501.674	467.413	287.249	400.47	360.054	422.397	561.488	585.73	446.785	496.43	519.372	597.638	518.525	565.832	391.335	633.865	519.476	532.808	453.378	322.855	470.094	447.725	466.329	516.688	440.939	537.389	460.722	502.753
ENSMUSG00000003721	109.727	213.916	158.341	298.384	421.023	203.862	290.968	194.443	462.531	179.531	278.851	275.12	206.799	197.019	257.985	316.545	324.538	433.464	227.22	379.309	184.678	307.583	128.08	215.936	197.757	323.392	239.145	277.44	204.491	76.6218	246.571	167.671	202.475
ENSMUSG00000003731	1301.96	1687.49	909.806	847.748	1103.32	735.365	1650.95	1897.62	1432.07	861.577	1097.7	1628.99	1563.95	939.295	666.816	1026.25	1402.52	774.902	820.674	1182.04	1357.74	1368.93	899.713	1028.52	1016.95	1506.27	940.263	1182.2	1013.73	1157.41	962.546	1576.96	1132.82
ENSMUSG00000003746	1149.12	1417.38	951.198	3931.24	3755.91	3154.1	1780.38	1492.13	3489.31	931.295	1209.49	1585.12	1183.27	1433.73	722.855	1256.03	1280.89	4623.84	1263.29	3563.21	1235.85	4435.97	1106.74	3330.42	1441.78	4434.56	974.352	1284.43	3707.85	1407.75	1318.84	1426.3	1041.83
ENSMUSG00000003752	120.863	83.8872	66.2008	140.434	154.36	151.75	84.3396	113.401	126.461	90.544	115.394	120.505	83.9552	120.065	115.173	163.084	81.1486	234.053	70.5737	147.42	171.783	181.698	113.419	81.4724	71.1028	219.669	115.657	129.648	125.067	94.415	94.8576	98.7699	88.2323
ENSMUSG00000003762	182.745	166.48	155.367	274.677	232.372	268.909	156.303	131.261	279.959	170.804	107.2	168.438	224.057	195.057	135.65	209.163	141.37	286.048	158.51	226.798	198.465	304.112	164.616	183.531	129.73	156.864	138.647	188.582	231.474	142.02	127.729	163.249	144.072
ENSMUSG00000003778	2558.66	2626	3152.76	1165.34	1469.92	1704.14	2366.14	3012.19	2141.74	1524.21	3660.93	4765.03	5267.9	2329.87	3255.04	3615.81	4028.37	1212.12	4174.38	1982.35	4488.51	1747.53	2039.22	980.551	2361.68	2441.04	3680.99	2347.45	1159.5	2608.71	5003.56	2701.53	3306.92
ENSMUSG00000003779	1825.08	1723.48	2222.64	253.883	437.605	1054.46	1834.05	1716.8	1098.73	1233.82	2285.16	3229.56	3471.76	1789.83	2532.77	2418.87	2902.82	121.243	2776.21	1092.72	3201.9	727.62	1926.46	488.278	1655.78	1111.49	2827.71	1896	412.342	1959.42	3052.42	2120.17	2421.3
ENSMUSG00000003808	1213.95	1148.98	1006.25	528.319	769.013	869.394	1110.72	1247.76	1022.47	958.495	1184.23	1447.08	1280.81	1239.72	1150.08	1273.13	1336.47	600.009	1212.33	1138.93	1256.07	882.235	1074	583.242	1063.03	960.983	1178.08	1036.07	695.979	1229.1	1205.06	1218.45	1122.36
ENSMUSG00000003809	360.839	350.669	293.221	355.077	316.464	342.646	382.592	364.686	388.252	340.705	297.777	392.592	361.366	436.946	357.966	377.489	410.792	347.871	350.247	401.081	345.368	317.314	353.36	265.092	208.691	363.971	296.717	390.416	260.945	491.622	314.777	438.023	327.631
ENSMUSG00000003810	704.414	1070.37	582.659	826.636	683.854	844.739	926.471	1271.61	864.269	387.965	755.985	870.773	795.466	903.782	410.437	897.266	1050.73	702.865	1004.62	716.435	1139.02	539.535	883.383	659.838	875.867	971.524	734.372	941.366	854.322	1112	1013.26	1246.65	803.763
ENSMUSG00000003812	457.323	236.526	195.145	498.798	648.843	491.938	518.532	329.389	619.302	580.287	296.41	337.167	401.768	351.199	259.399	349.548	368.49	642.286	315.421	572.999	249.879	612.207	262.885	506.183	453.679	541.694	303.714	331.503	640.742	454.162	191.395	356.649	288.804
ENSMUSG00000003813	1310.75	1118.57	906.349	766.131	848.229	1056.86	1147.52	1166.19	1086.96	737.891	1012.34	1338.43	1228.6	1169.92	997.65	1004.74	1081.9	816.808	1236.77	1050.77	1243.04	1077.64	1243.45	786.518	1070.12	1100.12	1049.05	1180.4	913.436	1127.98	1014.28	1313.25	980.577
ENSMUSG00000003814	6532.4	5818.27	5758.54	5900.07	6686.55	7353.69	8112	6290.34	8619.84	5686.93	6870.04	9591.94	8795.87	6399.21	6486.17	6316.15	8400.19	6548.86	8378.06	7346.04	8560.39	8159.93	5963.86	6322.37	7119.6	7575.46	7474.03	5675.11	6213.09	6427.92	7901.6	7528.99	7038.34
ENSMUSG00000003824	77.6368	74.5729	109.728	36.5843	30.837	81.0461	73.8773	61.3614	83.2182	126.175	127.98	146.652	184.469	57.5768	189.727	122.022	168.591	45.7491	129.788	90.0344	158.88	56.826	60.3375	33.0587	76.7178	74.5628	134.765	61.7593	56.3529	67.6887	127.889	67.0946	144.908
ENSMUSG00000003847	993.649	1005.2	799.414	2928.8	2254.13	2714.18	1065.09	1017.78	2218.56	290.88	1067.13	967.063	864.074	1354.54	304.621	1005.93	802.835	3163.24	964.844	2333.72	803.053	2889.93	902.919	2195.49	1025.69	3172.67	596.329	1046.41	2498.14	969.589	1064.41	1130.79	898.61
ENSMUSG00000003848	1207.5	1114.46	940.985	473.433	608.564	696.22	900.158	1198.47	838.233	1146.32	1051.62	1310.88	1151.94	1346.22	1030.23	1059.71	1359.03	520.938	1141.36	1070.64	1172.4	612.277	1052.89	459.766	1262.21	773.519	1106.57	1039.39	481.133	1362.38	913.515	1310.82	1028.47
ENSMUSG00000003849	7.88904	7.63461	5.04277	27.8397	23.1958	17.771	5.95545	5.65653	24.2013	8.42611	7.96953	11.996	9.00304	8.85528	9.18216	9.08369	12.0428	40.4123	13.0657	23.9721	10.9973	28.6706	7.89524	22.7325	12.7061	35.4087	5.05482	7.87529	30.8767	5.87245	8.95487	9.42254	14.1385
ENSMUSG00000003863	1.46197	0	6.72935	1.47406	1.49517	1.46366	1.24445	0	0.984666	0.693997	0	1.48206	0	0	0	0.748139	0	2.99565	0	0	0	7.30451	1.46314	0.732656	3.26073	0	1.49878	0	8.85009	2.17415	3.31941	0	0.74862
ENSMUSG00000003865	326.146	164.061	218.698	598.85	342.269	303.758	381.01	287.006	437.752	107.3	250.41	188.322	271.141	360.898	160.239	220.98	131.664	709.585	235.698	257.279	195.204	397.118	180.306	245.775	379.191	529.32	147.2	224.882	341.652	381.187	158.785	310.415	335.017
ENSMUSG00000003868	2590.29	2084.95	1785.45	375.626	951.162	1305.77	1773.44	2157.71	1601.91	2341.26	2112.83	2820.99	2327.47	3081.6	2441.96	2280.03	2600.51	638.746	2532.9	1899.17	2623.74	1428.15	2112.03	1034.71	1965.78	1294.16	2741.71	2102.9	795.294	2161.84	1656.86	2687.14	2629.7
ENSMUSG00000003872	3.8485	4.20228	0	0.981947	0.612735	0.487515	0	2.95751	0	1.03114	2.19331	3.9269	2.33487	1.51363	0	3.10536	0.609731	1.74432	0	0	3.10616	2.90823	1.70391	0	1.68749	3.99392	0.499212	0	3.09457	0.483302	0	3.86888	2.16718
ENSMUSG00000003873	1289.59	999.055	1044.95	628.652	842.417	854.017	1051	1174.33	1210.77	1252.85	944.05	1354.14	1077.82	1352.34	1270.7	1115.23	1461.1	760.164	1261.65	1055.97	1257.82	1009.34	937.192	538.756	1050.48	1181.41	1153.64	971.897	912.327	1153.61	1051.83	1664.75	1014.28
ENSMUSG00000003882	673.608	677.654	457.669	2523.84	1625.72	1474.69	380.913	1453.02	1373.72	465.961	421.817	675.022	460.615	1037.89	318.329	535.709	507.759	2716.72	571.392	1751.28	457.269	2092.76	515.028	1739.17	1160.6	1682.14	422.903	798.625	2149.05	1048.5	511.621	983.162	478.322
ENSMUSG00000003923	1081.97	1058.83	852.886	659.426	821.725	882.245	1042.12	1084.08	1047.7	1198.61	1034.66	1300.88	1501.48	947.436	1073.91	980.724	1201.94	769.867	1361.03	1211.22	1252.84	1097.3	896.317	634.08	1020.38	995.937	1064.31	924.242	660.045	1025.64	1360.83	1016.88	1065.54
ENSMUSG00000003929	320.539	202.876	236.138	255.115	279.532	288.483	288.052	246.892	209.138	266.598	321.984	382.484	373.858	269.342	239.121	303.283	323.119	297.113	353.082	342.049	312.79	325.102	321.969	208.426	311.235	298.541	225.437	315.063	275.216	308.541	353.804	173.229	288.039
ENSMUSG00000003934	15.7781	14.3149	14.1197	11.9313	16.1362	27.6437	15.8811	14.1414	9.68053	7.48984	19.9238	22.9922	8.00265	16.7266	10.2024	34.3162	15.0535	16.1649	18.091	26.9686	19.9951	11.8636	14.8036	17.7907	5.8643	13.7701	10.1097	9.84413	7.96822	8.80873	20.8947	11.3071	17.1682
ENSMUSG00000003948	278.372	183.799	343.127	946.576	950.279	576.979	326.216	231.093	500.964	263.838	316.163	346.769	389.809	305.044	398.334	390.898	301.633	1791.16	465.608	627.028	407.777	798.904	345.412	486.685	251.771	926.711	321.805	264.896	510.28	328.201	395.983	247.496	486.615
ENSMUSG00000003949	10.8383	12.0001	11.0037	1460.66	483.629	43.9011	13.6792	3.24816	509.441	3.90571	39.476	45.6722	16.6583	9.03994	8.20192	11.0118	9.22045	814.882	20.0818	649.691	17.8982	74.973	175.235	33.4857	149.46	456.753	9.80118	6.21806	261.119	3.93421	493.318	8.65713	128.248
ENSMUSG00000003955	556.445	463.854	409.578	162.527	334.011	343.4	538.457	430.412	601.194	661.574	402.383	614.338	629.415	524.698	582.307	501.372	618.416	235.994	639.623	492.639	569.464	450.497	470.691	248.251	287.917	405.475	579.709	478.761	243.83	575.338	529.808	586.185	553.527
ENSMUSG00000003970	26280.7	24515.9	17465.8	11137.8	16297.1	16252.1	19756.6	26509.4	20644.9	40798	21239.7	23887.6	22481.6	26666.2	25276.9	21927.1	25406.8	12776.7	24726.7	23263.8	23970.4	19492.3	21652.1	10565.6	25891.8	16395.1	22671	23269.2	13274.7	25231.9	19642.3	26989.7	21616
ENSMUSG00000003974	0	0	0	0	0	0	0	0	0	0	0	0	0	0	0	0	0	0	0	0	0	0	0	0	0	0.983604	0	0	0	0	0	0	0
ENSMUSG00000003992	114.685	101.399	84.7231	254.421	233.239	161.475	165.865	99.4035	140.744	95.4124	100.434	131.084	114.684	92.9261	98.1487	146.087	152.4	298.16	123.766	161.544	102.614	236.089	129.66	162.596	113.957	203.007	118.7	108.624	236.354	112.458	136.224	95.9064	124.638
ENSMUSG00000004018	330.59	287.3	206.969	153.243	181.373	150.625	322.531	187.766	177.984	326.819	205.101	256.807	246.164	271.88	207.471	242.317	211.322	113.759	316.026	298.34	285.329	211.036	185.481	77.6525	216.419	208.037	288.739	269.826	174.551	265.173	284.255	150.047	226.468
ENSMUSG00000004031	0	0.964106	2.03783	15.0672	12.2264	5.87394	1.0028	0.952453	5.86795	0	1.00645	0	1.01055	0	1.03074	1.01969	0	11.7493	2.03078	6.05458	2.02005	14.9819	0	3.99409	0	8.94311	0	0	6.03751	0	0	0.951898	1.02023
ENSMUSG00000004032	18.2223	10.503	24.4517	62.5518	65.4225	21.8019	19.2733	18.5112	38.7606	26.5838	24.2366	14.1356	25.8064	24.2066	34.2667	27.8588	34.2837	102.141	26.7183	40.7842	25.0545	58.0307	18.8848	46.1208	8.35494	78.7835	19.8665	7.37194	35.2594	12.1515	14.0694	17.1332	26.7933
ENSMUSG00000004035	0	1.40624	2.11062	4.85508	9.84921	13.3588	6.02429	4.60364	23.192	5.6622	2.08476	5.57873	2.09344	4.41083	1.42339	6.33655	2.10018	9.86674	3.5055	20.8637	3.48703	43.8422	2.15712	2.06839	4.77686	14.13	4.94094	1.56802	4.86793	6.09063	3.47038	1.97187	2.81792
ENSMUSG00000004038	0	0	0	0	0	0	0	0	0	0	0	0	0	0	0	0	0	0	0	0	0	0	0	0	0	0	0	0	0	0	0	0	0
ENSMUSG00000004040	1181.63	1231.21	878.083	3224.5	1949.05	2720.88	1495.79	1451.8	1594.31	732.345	1229.32	1490.12	1005.3	2096.02	662.188	1115.24	1182.02	3161.37	990.574	1755.01	1083.82	2759.56	1508.47	2915.77	1868.46	3020.9	1119.31	1404.4	3630.1	1488.57	1084.64	1909.92	1032
ENSMUSG00000004043	749.673	762.176	723.648	930.664	1054.71	1032.18	765.033	738.705	1139.93	458.33	855.073	914.742	933.042	844.062	748.898	846.004	753.46	1066.78	730.229	1067.43	898.244	1142.33	799.856	834.031	863.737	1000.23	815.87	850.449	1018.49	788.634	867.457	815.652	895.711
ENSMUSG00000004044	426.598	402.808	379.836	1259.01	1290	692.899	367.931	459.43	998.057	213.781	470.698	469.375	421.151	512.726	440.714	681.417	413.67	2095.23	560.326	940.936	501.042	1094.55	542.873	716.139	322.691	1204.63	378.745	368.798	636.027	385.056	400.298	504.823	645.882
ENSMUSG00000004054	737.624	803.544	638.414	972.401	1035.74	1013.93	648.15	734.408	1052.27	363.259	738.176	776.738	633.213	883.558	588.679	764.039	724.573	1135.59	714.592	1164.64	675.835	1080.58	723.401	935.988	681.241	920.627	616.687	689.088	1037.86	666.524	587.041	883.833	706.926
ENSMUSG00000004056	1317.6	1519.92	1388.62	1946.23	1765.16	2060.2	1510.05	1543.73	1929.85	1088.75	1347.15	1877.19	1525.68	1182.74	1093.63	1326.67	1474.2	2350.23	1409.73	1844.39	1544	1969.53	1638.84	1905.99	1270.43	2452.47	1366.29	1610.29	1678.84	1161.84	1270.02	1508.15	1298.99
ENSMUSG00000004069	1263.13	1035.04	859.009	589.355	681.463	934.504	1005.05	1130.53	964.9	800.601	994.402	1500.65	1264.76	1230.11	1006.04	977.412	1231.73	737.687	1406.13	952.21	1252.91	820.091	1130.43	610.59	828.82	1015.54	1043.61	1138.16	607.169	1160.07	1083.42	1295.43	1026.87
ENSMUSG00000004070	823.629	609.275	677.024	622.913	765.099	886.876	962.685	816.404	908.079	718.335	613.689	1026.11	1037.71	748.579	665.558	849.405	969.673	629.779	930.085	940.943	888.975	965.488	731.745	727.804	957.14	963.26	799.954	732.694	851.683	827.78	667.084	1018.57	878.852
ENSMUSG00000004071	568.089	638.206	545.896	751.431	655.824	833.04	492.812	748.047	844.711	575.588	557.823	535.301	599.852	744.126	442.176	579.212	623.76	733.044	595.401	732.501	688.468	751.483	699.178	635.061	664.171	842.814	521.431	680.54	688.701	719.158	562.58	663.166	642.987
ENSMUSG00000004085	738.509	538.717	367.751	204.566	302.025	367.66	668.473	577.868	436.33	453.711	462.891	627.491	550.502	773.135	406.302	433.957	500.406	259.434	627.57	375.393	584.653	313.946	593.724	227.935	624.028	538.442	600.961	602.58	230.991	679.305	599.815	851.951	459.45
ENSMUSG00000004096	1278.58	1042.6	858.997	791.088	901.177	957.96	1195.43	1054.48	973.133	1254.76	1069.78	1420.72	1602.06	1123.12	1360.4	1145.07	1395.01	920.485	1457.97	1063.29	1430.25	958.358	1077.23	825.503	1250.69	961.762	1254.37	1079.84	856.631	1206.35	1281.6	1064.22	1169.47
ENSMUSG00000004098	182.834	195.963	129.696	576.266	412.436	214.741	133.569	243.394	383.424	95.1909	160.867	196.305	160.54	201.809	147.462	187.277	176.441	636.681	225.414	276.79	222.233	285.79	198.718	218.389	182.401	382.369	182.4	243.99	200.554	162.266	165.632	260.847	211.4
ENSMUSG00000004099	5809.58	6105	4365.19	2092.32	2330.87	4834.45	7361.89	6629.26	4055.67	2383.94	6447.58	7641.86	7152.12	5964.71	4365.43	5445.43	5487.82	1863.03	5533.22	4539.13	7087.46	3418.73	6931.4	2455.91	5969	3993.27	6372.08	7538.1	2486.89	6630.62	6718.05	6637.21	5595.92
ENSMUSG00000004100	2975.66	2916.97	2226.47	610.797	1098.19	1486.33	2185.74	2968.8	1832.19	2674.64	2671.35	2799.06	2466.2	3063	2797.23	2715.43	2651.34	618.008	2669.04	1995.25	2860.65	1399.49	2461.99	885.182	3156.1	1639.24	2521.73	2506.35	912.9	2747.8	2223.33	2871.29	2536.36
ENSMUSG00000004105	114.041	115.838	177.747	865.783	568.807	377.643	174.995	114.362	478.866	110.869	193.564	221.185	186.516	135.025	175.289	174.054	151.639	1033.49	227.401	332.713	185.331	614.768	137.496	365.527	92.9913	824.488	147.427	124.424	462.521	108.219	152.995	129.429	224.077
ENSMUSG00000004110	54.3398	80.4771	514.707	711.715	776.274	731.526	173.538	69.8277	332.351	21.7556	272.224	191.02	171.148	81.0449	113.188	222.526	131.982	545.022	133.047	316.09	212.861	648.353	286.949	353.147	172.508	799.839	166.715	88.0278	566.527	65.8831	162.772	78.2556	206.854
ENSMUSG00000004113	22.8245	68.0277	7.90244	337.013	240.028	457.578	98.893	5.65932	328.305	4.29773	84.8672	33.0308	47.7642	20.4957	33.4896	21.5475	98.8679	473.934	29.3053	236.555	6.99205	319.885	28.237	259.631	48.7579	260.101	23.0754	21.929	430.25	22.8784	7.44179	10.2199	27.1039
ENSMUSG00000004127	317.469	270.617	240.196	136.002	86.9219	165.844	319.02	271.162	207.635	333.121	306.546	418.817	397.355	226.868	305.931	200.286	413.981	92.9574	360.49	224.325	343.555	195.786	298.585	131.687	326.549	274.745	281.055	367.167	118.937	359.941	384.751	375.801	298.848
ENSMUSG00000004151	20.3245	12.9537	6.32542	31.791	22.4894	63.448	13.5555	0.851326	42.4604	2.88159	1.53307	8.57844	10.0066	7.88384	5.92013	15.7462	4.63332	46.099	13.2224	7.97859	11.5386	73.3045	6.43719	19.703	22.9231	17.4523	18.9759	7.91489	30.2952	7.26658	13.1897	2.90019	6.77111
ENSMUSG00000004187	27.1329	22.2802	25.1723	118.474	201.173	145.257	24.7018	43.1177	132.287	10.5224	62.8181	41.0217	27.9348	39.7507	21.1145	47.295	39.7844	119.491	21.0818	155.223	14.3083	155.465	33.3083	113.498	33.2592	94.6574	47.0118	21.4956	185.333	40.2178	13.4952	32.0417	52.7982
ENSMUSG00000004207	19174.7	14700	16734.8	30968.4	28875.7	27987.2	24844.3	16345.8	27758.3	10536.5	16326.9	22914.9	17483	18369	14619.1	19283.1	21623.5	35588.9	21093.9	30668	17322.9	29167.1	13291.3	26454.2	18018.8	31682.8	16336.2	14152.4	34870.3	18085.3	15647.6	16297.2	16577.3
ENSMUSG00000004221	833.376	857.063	438.61	887.596	687.494	802.165	783.505	660.004	744.297	688.681	591.244	647.03	676.333	726.041	546.979	598.562	590.393	752.538	655.406	818.011	551.555	900.607	746.012	561.022	805.525	973.887	555.71	697.86	821.937	650.358	564.247	848.996	567.556
ENSMUSG00000004231	0	0	0	0	0	0	0	0	0	0	0	0	0	0	0	0	0	0	0	0	0	0	0	0	0	0	0	0.984377	0	0	0	0	0
ENSMUSG00000004233	277.562	171.93	101.677	177.591	182.257	347.533	197.269	211.811	295.716	207.447	184.127	224.683	157.471	148.891	170.499	200.215	226.375	223.335	259.47	330.945	315.595	217.898	206.271	142.864	211.255	173.521	179.38	271.14	216.788	276.98	240.688	352.172	175.451
ENSMUSG00000004263	410.386	276.329	491.422	1192.05	828.14	978.218	384.612	372.035	782.809	73.0334	411.636	337.506	194.984	499.439	224.892	346.739	269.608	1021.94	296.63	756.377	311.668	647.777	288.177	953.814	523.166	950.598	245.697	361.851	989.821	273.116	305.913	364.309	321.703
ENSMUSG00000004264	4666.33	3901.57	3579.17	1431.64	1672.34	2773.17	4052.54	3853.98	3048.28	5715.06	3923.55	4580.07	4611.81	4741.22	4437.66	3908.76	4943.64	1352.54	4984.38	3000.56	4784.56	2535.06	3767.22	1740.42	4613.83	3060.67	4033	3539.62	1834.29	4778.44	3992.89	4137.95	3623.93
ENSMUSG00000004266	3329.1	3173.58	2663.92	6135.05	4939.03	5796.51	4044.94	3362.75	6316.01	2597.81	4131.57	3919.65	4273.95	2904.23	2589.83	3168.07	3968.59	5215.32	3713.26	4903.62	4253.8	6126.6	3118.57	4482.01	3137.25	5869.53	3447.76	3001.92	5511.65	3227.92	4270.37	2631.7	3542.99
ENSMUSG00000004267	14.3246	9.69319	23.6253	289.494	298.806	95.1853	21.3178	14.4617	182.688	30.3808	72.6871	21.6523	11.9863	8.41678	12.7171	64.74	30.5314	299.693	17.8571	199.113	22.4097	218.968	15.7882	305.332	14.673	187.22	17.9399	48.5949	305.874	14.2562	25.2737	19.7801	44.8176
ENSMUSG00000004268	2141.33	1820.37	1912.93	1158.34	1383.95	1639.68	2037.63	1975.3	1912.07	3700.54	2029.23	2556.75	2519.66	2278.12	2598.13	1971.72	2445.51	1074.03	2511.15	2012.66	2495.35	1606.57	1908.99	990.622	2130.35	1744.04	2443.53	1849.02	1076.03	2400.78	1853.7	2213.06	2201.64
ENSMUSG00000004270	680.666	680.472	400.842	610.58	567.862	680.91	715.43	503.744	729.805	225.17	427.176	599.21	470.956	629.201	494.297	487.704	619.312	775.688	527.399	809.415	676.889	758.646	409.271	514.067	608.645	907.749	557.066	536.652	586.433	626.762	444.306	619.737	438.642
ENSMUSG00000004285	958.671	867.198	680.978	651.12	910.656	762.566	739.125	893.97	1020.98	1565.4	756.052	938.784	871.857	900.19	949.47	812.466	1010.93	816.753	1010.88	1155.93	939.144	953.039	825.444	591.962	970.238	799.545	823.356	760.592	780.715	894.317	811.291	982.942	776.406
ENSMUSG00000004296	0.986142	3.8173	14.1198	57.6679	64.5448	40.4783	12.9035	17.9124	33.8818	18.7247	25.9009	22.9922	14.0047	5.90348	18.3643	28.2604	18.0641	97.9999	20.101	60.9291	14.9963	41.5229	11.8428	73.1395	13.6834	45.2445	18.1973	13.7817	117.531	10.7662	18.9047	27.3253	25.2474
ENSMUSG00000004317	640.673	544.192	145.579	252.898	178.744	497.619	473.147	531.726	424.626	514.51	256.101	443.962	408.117	431.482	283.351	195.757	424.778	179.205	239.514	333.387	296.704	153.673	395.367	300.192	611.237	428.27	275.715	694.083	282.967	388.736	216.754	472.703	286.509
ENSMUSG00000004319	1250.87	1037.45	1008.32	987.878	1024.44	1075.53	1293.43	1190.22	1032.47	736.828	1087.33	1474.69	1419.92	1459.73	971.647	1125.06	1299.22	1036.78	1297.08	1091.02	1409.31	1212.95	983.253	921.029	1587.15	1339.93	1106.01	1167.35	1017.76	1169.33	1327.43	1062.04	1081.36
ENSMUSG00000004328	40.2461	6.30184	1.66491	24.6209	14.1517	23.2836	4.91574	10.8944	48.2902	18.3165	1.64456	2.47543	1.65148	6.49717	1.68427	5.19702	1.65668	13.343	7.44936	9.06908	1.65043	64.8222	2.44381	13.8691	31.4828	12.178	3.33794	3.25028	18.9093	2.54006	4.10638	4.66652	3.33441
ENSMUSG00000004341	0	0	0	0	0	0	0	0	0	0	0	0	0	0	0	0	0	0	0	0	0	0	0	0	0	0	0	0	0	0	0	0	0
ENSMUSG00000004344	0	0	0	0	0	0	0	0	0	0	0	0	0	0	0	0	0	1.01031	0	0	0	0	0	0	0	0	0	0	0	0	0	0	0
ENSMUSG00000004347	13.7189	6.26106	54.4443	48.4031	42.9572	29.4876	56.8704	11.8946	32.3458	7.87259	59.1213	14.9315	7.12859	11.2153	6.42972	6.55924	11.6264	54.7763	7.25038	72.6152	11.2004	65.4046	6.61838	48.3493	54.6608	45.7287	14.9141	8.70442	42.4907	8.28642	64.1079	5.16737	12.5327
ENSMUSG00000004356	2352.99	1946.52	1797.29	973.809	1176.04	1545.33	2029.47	1932.79	1676.98	898.328	2023.83	2494.5	2502.77	2149.81	1605.54	1855.55	1976.01	1023.61	1730.22	2044.08	1843.96	1677.01	2027.93	1390.03	1952.99	1629.59	2107.7	1547.59	1209	1934.59	2267.91	1626.3	1999
ENSMUSG00000004359	239.778	148.305	136.388	370.022	335.045	273.827	513.528	230.345	372.554	190.058	175.866	249.456	259.053	296.515	124.288	170.637	280.068	393.93	317.01	379.445	181.461	320.124	180.663	347.075	166.92	354.626	148.455	215.832	359.064	262.71	208.836	132.928	137.88
ENSMUSG00000004360	0	0	1.22172	8.34813	4.83865	7.07191	2.13444	0	3.48339	4.49183	0	1.199	2.39972	2.36038	0	1.21062	1.20374	9.179	3.61652	4.29574	2.39832	5.65714	1.18373	1.79593	3.15267	10.7615	2.4252	0	1.07091	1.17399	1.19343	1.14143	0
ENSMUSG00000004364	1884.63	1134.77	1658.54	2062.08	1887.44	1895.82	1987.1	1358.42	1439.04	573.145	1752.74	2391.48	2381.46	1851.22	1857.16	1944.36	2195.31	2547.51	2204.87	2012.16	2287.87	2098.37	1413.31	1546.99	1784.34	2146.65	2067.53	1722.49	1982.86	1670.67	2006.19	1024.23	1809.27
ENSMUSG00000004366	0	0	0	0	0	0	0	0	0	0	0	0	0	0	0	0	0	0	0	0	0	0	0	0	0	0	0	0	0	0	0	0	0
ENSMUSG00000004371	4.02398	1.80326	0	0.819606	2.49193	2.43945	1.65789	8.90704	1.60442	0	1.64099	0.82336	0	1.85919	1.92782	2.73847	1.03746	2.828	1.89911	2.46819	0.823454	2.44282	2.43854	1.62817	5.65568	1.62022	2.23013	1.86011	0.820372	0.81151	1.27043	0.776066	1.90826
ENSMUSG00000004383	36.8945	31.608	35.4589	133.149	136.52	101.523	64.3343	41.9547	119.408	24.7077	44.3326	48.4976	40.5171	36.5331	25.9011	39.6902	35.2864	168.025	40.3163	122.748	35.3895	102.895	34.7034	110.662	54.8897	134.663	42.0814	42.9489	173.056	37.4638	30.7075	38.8965	43.7191
ENSMUSG00000004393	1393.28	1098.48	915.38	522.356	548.01	835.571	1285.03	1246.29	897.811	1121.13	903.273	1319.35	1131.13	1427.15	1063.85	917.301	1109.65	449.942	1197.42	936.679	1227.86	796.454	1015.56	563.595	1079.3	924.279	1082	1197.49	573.622	1273.09	1109.75	1210.34	1003.48
ENSMUSG00000004394	428.184	453.629	316.351	415.436	602.802	481.758	370.389	553.188	615.608	559.162	400.816	412.257	418.335	472.896	424.481	447.801	376.586	643.161	411.561	499.179	428.815	604.413	335.393	388.735	406.3	586.524	371.633	405.934	468.91	412.283	368.961	560.169	390.289
ENSMUSG00000004415	41.5629	31.078	8.21341	2.04322	8.48104	29.651	67.0605	23.3069	62.4749	3.33568	5.94757	13.5136	8.82461	50.892	3.11573	14.5365	28.5714	7.40786	14.3828	17.5173	33.7661	10.5762	19.3079	26.5049	3.37692	16.4952	12.1062	67.7349	19.8142	7.52142	76.3169	32.9115	39.0413
ENSMUSG00000004446	1321.61	1043.58	887.328	360.855	614.295	820.525	1081.04	1185.97	724.75	974.248	901.25	1172.68	1110.89	1272.05	847.427	900.929	1137.59	513.039	1023	728.797	1263.24	716.239	1040.66	479.346	1209.56	865.242	1095.11	1212.68	518.635	1210.53	894.128	1161.18	1016.82
ENSMUSG00000004451	292.809	228.117	238.814	395.202	384.653	320.088	287.239	234.586	373.405	247.532	262.059	360.926	339.431	314.107	268.578	307.853	306.226	463.326	315.809	359.553	334.814	379.613	240.648	341.631	265.107	410.404	284.884	202.002	435.805	221.498	247.581	250.765	258.269
ENSMUSG00000004455	4691.33	3666.07	3388.1	2679.38	3647.68	3288.23	4935.01	4078.8	4019.57	3903.25	4300.97	5839.74	6322.43	5145.01	4948.59	4461.23	5434.93	3238.19	5577.08	4733.15	5959.88	3877.96	3716.02	2230.13	4685.94	3893.86	4689.56	3945.63	2687.4	4633.26	5143.12	3725.95	4217.75
ENSMUSG00000004460	1367.51	1223.68	1178.59	867.991	1166.22	1102.01	1440.52	1389.86	1339.83	1303.46	1177.87	1629.71	1456.49	1292.23	1300.91	1263.92	1604.2	1067.58	1643.32	1192.22	1606.65	1381.63	1204.84	926.636	1518.62	1293.35	1269.3	1152.09	895.171	1156.54	1441.51	1461.07	1362.76
ENSMUSG00000004462	415.647	522.41	526.234	104.441	570.197	149.972	133.479	373.797	635.272	134.61	284.622	812.749	540.487	561.692	615.48	193.57	449.55	316.937	399.037	181.284	164.685	572.263	720.201	316.629	1012.47	140.626	448.799	158.047	838.396	263.072	186.1	421.057	308.911
ENSMUSG00000004473	18.7364	14.3149	15.1283	31.8168	30.2554	41.4656	25.8069	23.5689	29.0416	17.7884	14.9429	7.99727	14.0048	25.5818	12.2429	19.1766	14.0499	28.2886	29.1466	40.9524	16.9958	33.6137	6.90834	29.6512	24.4347	58.031	20.2192	16.735	32.8688	13.7024	12.9348	16.9606	16.1583
ENSMUSG00000004500	148.575	126.269	71.6438	125.248	123.648	150.621	133.373	112.921	136.908	89.9044	73.4328	108.837	103.487	158.933	72.2846	95.7521	103.893	115.989	89.4568	183.211	108.714	139.058	130.355	127.25	84.146	159.869	88.8443	139.667	139.881	138.375	99.4928	141.996	100.867
ENSMUSG00000004508	116.275	87.1165	61.3778	329.132	217.691	196.365	198.136	106.679	211.718	70.3306	87.1489	118.549	122.317	135.662	68.7679	99.8126	94.4741	335.283	103.215	219.401	82.7076	248.178	65.6909	240.945	177.514	260.911	74.9828	77.6939	306.041	138.976	72.8517	93.8427	74.9036
ENSMUSG00000004530	2089.56	2041.17	1390.1	1471.23	1775.58	1852.8	2352.42	1888.31	2039.63	1206.99	2028.07	2996.73	2471.06	2040.3	1476.53	1342.29	2275.52	1249.72	1872.05	1678.86	2639.5	1734.42	1803.31	1141.98	1949.82	2050.64	1938.62	2179.97	1643.05	2325.52	1691.55	2231.41	1331.86
ENSMUSG00000004535	1971.32	1751	1668.33	3167.24	2893.2	2811.18	1982.93	1459.3	1939.52	1132.17	1428.27	2634.5	2216.77	1549.36	1271.2	1474.5	1991.06	3325.53	2133.76	2326.82	2329.53	2590.13	1721.15	2487.26	2336.97	2624.97	1385.89	1798.48	2743.2	1761.04	2039.36	1853.44	1639.4
ENSMUSG00000004540	0	0	0	0	0	0	0	0	1.93612	0	0	0	0	0	0	0	0	1.0103	0	0.998814	0.999784	0	0.986926	0	0	0	0	0	0	0.978741	0	0.942271	0
ENSMUSG00000004542	0	0	0	0	0	0	0	0	0	0	0	0	1.04045	0	1.06002	0	0.979332	0	0.817814	0	1.04197	0	1.02687	1.16332	0	1.82546	0	0	1.03946	0	0	0	0
ENSMUSG00000004552	371.463	376.196	223.361	179.048	206.683	282.774	270.897	616.686	326.987	422.417	251.958	302.696	306.922	508.12	155.191	263.826	273.874	219.801	231.149	400.719	296.326	369.442	315.172	135.133	781.886	356.177	244.586	362.966	206.753	378.006	276.914	372.792	230.698
ENSMUSG00000004558	80.5247	101.674	76.9635	477.888	398.266	196.205	56.6385	162.284	245.885	82.8003	83.4995	55.2942	47.0924	180.128	40.8442	117.263	50.8214	739.051	118.489	272.404	91.3813	350.079	116.677	190.197	74.9665	478.949	43.4364	112.691	295.046	45.3866	46.3084	83.0083	76.9126
ENSMUSG00000004561	458.372	306.459	226.184	293.205	435.94	452.079	460.292	411.397	483.154	232.001	369.279	346.617	374.625	560.405	360.822	308.731	316.07	406.54	361.693	438.576	439.846	527.232	405.018	292.446	308.571	515.039	477.152	432.068	563.805	529.805	494.691	484.531	380.342
ENSMUSG00000004562	92.9024	74.2004	77.5462	370.551	647.929	187.201	60.0314	100.185	383.995	64.4539	123.617	125.223	69.9979	74.0527	114.819	106.818	99.955	621.236	100.98	422.612	112.123	505.373	68.519	329.351	80.4253	408.961	74.2636	55.0071	634.332	74.553	44.6325	158.632	131.6
ENSMUSG00000004565	240.15	603.543	331.507	834.055	870.79	1030.18	546.398	465.936	967.5	183.173	418.101	546.437	420.8	601.497	418.644	723.819	466.8	723.135	614.075	945.544	282.529	827.176	499.626	483.32	406.204	875.034	326.84	504.113	725.249	553.967	426.343	654.583	474.98
ENSMUSG00000004567	461.012	261.398	375.863	689.241	938.72	573.638	317.248	361.238	724.188	197.797	371.711	417.306	426.134	380.863	386.842	594.828	359.024	762.15	460.267	624.298	432.16	682.416	415.535	587.385	390.779	782.276	437.009	437.956	758.11	378.729	345.783	421.131	428.076
ENSMUSG00000004568	2247.91	2569.7	1595.44	3264.05	3110.96	3286.16	2302.17	2005.53	3255.76	1118.38	2208.27	2116.13	2119.76	2303.19	1319.12	2315.08	2144.93	3055.39	1820.58	2911.56	2212.9	3383.82	2211.38	2280.8	1782.21	3418.34	1764.51	2643.43	3006.06	2080.6	1673.94	2427.08	1991.29
ENSMUSG00000004591	785.678	752.354	629.92	826.285	623.223	1142.03	930.702	715.737	796.634	673.331	680.767	1028.38	1203.77	708.029	771.448	773.078	994.523	928.01	927.764	960.008	941.246	909.836	815.878	732.271	1043.75	986.542	874.7	742.954	845.466	874.357	932.548	1081.53	898.207
ENSMUSG00000004609	61.3709	160.315	157.923	969.239	690.579	909.552	248.172	162.327	653.602	133.662	179.794	137.973	75.6255	223.117	33.945	205.857	99.0595	751.201	110.91	779.152	143.519	697.471	103.69	735.324	149.978	937.257	72.7058	62.7418	1130.77	116.002	98.8774	104.485	165.301
ENSMUSG00000004610	873.574	835.523	719.53	609.182	807.575	577.263	737.274	815.486	882.637	1256.84	745.519	942.964	971.816	797.285	1024.26	844.39	982.405	943.925	1004.13	915.391	984.975	911.921	824.484	456.911	860.097	832.062	947.158	723.742	500.983	834.43	761.779	903.697	958.56
ENSMUSG00000004612	29.0802	67.9412	83.6684	508.67	644.733	422.755	82.7208	34.8747	421.285	34.9736	140.438	67.3565	71.3726	30.0708	68.2097	89.4009	79.2781	608.179	66.7204	473.865	57.0454	611.58	68.4829	446.567	21.6744	366.053	63.0592	32.4321	650.611	27.8153	82.4231	50.5844	119.604
ENSMUSG00000004626	1295.88	1230.8	934.554	1468.28	1515.01	1535.09	1227.7	1099.9	1325.56	827.352	877.814	1058.3	769.114	1444.43	853.743	1233.61	1014.72	1449.59	838.312	1135.32	1120.61	1456.84	1131.77	1327.09	1413.71	1417.39	940.422	1176.77	1833.22	1372.89	783.103	1474.46	1223.38
ENSMUSG00000004630	0	0	0	0	0	0	0	0	0	0	0	0	0	0	0	0	0	0	0	0.99885	0	0	0	0	0	0	0	0	0	0	0	0	0
ENSMUSG00000004631	37.0847	28.3798	39.1102	156.626	126.077	76.8881	46.3641	30.8702	114.458	27.0738	49.6634	42.7724	53.5357	33.606	24.6315	50.5768	70.1474	214.076	54.9593	93.1717	36.052	138.322	51.0771	81.7939	39.2874	118.594	41.7858	32.0496	97.7969	34.7213	49.0528	49.0655	37.5373
ENSMUSG00000004633	47.674	94.9416	7.86856	89.2879	136.372	60.63	84.6055	40.013	144.505	39.0302	16.9303	24.7887	36.5346	73.3649	26.9748	47.8109	78.2864	69.1133	33.5394	86.4725	41.2307	125.978	44.3405	59.1105	44.5022	61.4813	30.1442	50.9632	109.277	61.5101	48.1724	40.6316	14.0837
ENSMUSG00000004637	168.803	157.593	133.947	103.473	124.59	107.449	112.031	140.098	111.073	139.159	125.581	118.13	163.419	159.555	156.144	156.12	132.966	107.276	153.45	130.174	175.284	118.684	179.155	88.4013	213.476	113.647	138.105	163.669	95.9251	184.741	151.129	129.298	132.45
ENSMUSG00000004642	1902.07	2037.3	1193.2	703.885	905.679	1192.43	2101.63	1761.21	1620.49	1840.87	1645.7	2224.26	2046.71	1785.76	1763.72	1798.38	1731.98	792.428	1964.98	1999.21	2192.74	1342.06	1791.81	717.562	1531.39	1422.75	1811.87	1941.81	808.971	1954.25	1902.68	2244.12	1856.29
ENSMUSG00000004651	2.64597	0.711608	5.51923	62.5752	19.9944	11.0407	2.721	2.41117	9.00144	0.928449	1.83335	8.15103	4.6023	7.16477	2.81509	6.50078	0	19.7635	3.71124	11.7147	1.89907	34.4938	2.17739	10.0066	2.72672	23.0068	1.83522	0.907271	12.7337	2.40931	5.89108	0.981618	0.973113
ENSMUSG00000004654	0	0	0	0	0	0	0	0	0	0	0	0	0	0	0	0	0	0	0	0	0	0	0	0	0	0	0	0	0	0	0	0	0
ENSMUSG00000004655	1028.53	1087.93	930.895	2318.65	2332.69	1809.68	1069	1538.58	1698.93	1139.4	980.251	1232.59	1063.36	1513.27	836.597	1229.33	1170.16	2716.72	1187.97	1397.37	1161.72	2165.12	1006.64	1433.14	1517.89	1574.71	1035.23	1102.54	1979.1	1216.58	1109.41	1060.98	1182.59
ENSMUSG00000004661	343.939	122.593	390.162	916.078	1036.58	679.604	368.081	301.639	666.709	84.6569	355.572	295.97	178.571	224.73	184.013	483.654	163.864	1123.88	234.271	679.857	186.78	1002.05	299.071	682.607	202.322	778.502	81.6924	276.049	1136.78	333.005	215.373	228.812	437.41
ENSMUSG00000004665	1609.68	1463.37	1243.95	4875.46	4679.58	3846.7	2062.11	1043.61	4034.96	814.227	1465.3	1458.35	1053.55	1390.58	908.173	1293.77	1313.78	5183.29	1208.73	3809.84	1320.57	4990.8	1267.66	3963.04	993.838	3633.08	1039.14	1178.28	5537.97	1288.45	1153.73	1403.39	1436.76
ENSMUSG00000004667	1106.48	998.647	888.099	760.243	843.725	1038.08	883.254	999.577	1196.69	1492.52	970.947	1212.25	1220.05	1173.21	1093.62	913.58	1281.72	847.741	1285.8	1092.53	1155.96	1129.17	970.796	698.252	948.366	1063.8	1134.27	914.803	805.479	1131.24	992.609	1091.42	1032.26
ENSMUSG00000004668	1.97232	0.954258	5.04273	12.9256	13.1108	2.96185	7.94045	1.88539	7.74458	0	5.977	3.99886	5.00164	2.95195	2.0404	3.02773	2.00722	27.2784	6.03038	11.9859	5.99849	13.8408	0	11.8605	2.93204	12.7865	3.03287	2.95308	19.9205	1.9575	5.96999	0	2.01968
ENSMUSG00000004677	1674.79	1479.19	1609.12	3332.03	2767.56	2098.76	1731.79	1594.33	2425.39	928.746	1862.46	1301.16	2167.06	2708.06	1345.81	1749.14	1549.99	2554.45	1340.94	2075.66	1965.48	2291.2	1692.89	2900.93	1260.42	3106.93	1460.37	1553.96	2987.12	1921.78	1690.5	2543.34	1872.36
ENSMUSG00000004698	34.9712	75.5746	56.8152	448.579	361.483	587.715	111.518	33.5729	494.496	46.3604	59.9929	60.7707	55.9056	63.174	36.1165	62.7242	52.7119	395.607	64.3718	463.063	102.789	441.873	33.8451	325.667	78.0086	437.876	32.5559	37.808	460.752	59.1457	72.6971	41.9419	55.6576
ENSMUSG00000004707	1656.49	1448.68	1503.45	1559.13	1597.1	1852.32	1919.24	1493.71	1907.79	967.211	1668.44	1964.39	1913.3	1543.91	1639.26	1850.71	1746.19	1904.52	1736.69	1782	1829.64	1750.97	1518.68	1407.31	1341.95	1743.54	1728	1488.26	1717.21	1531.67	1692.45	1628.98	1758.87
ENSMUSG00000004709	304.374	415.531	173.451	145.632	81.9382	109.31	259.699	331.007	116.896	206.473	192.272	290.082	302.712	328.769	248.931	309.088	267.277	129.406	218.127	105.536	292.43	110.084	288.348	116.252	443.909	93.0565	334.83	293.579	148.573	297.576	355.622	251.58	207.411
ENSMUSG00000004730	584.445	106.658	65.199	419.498	151.214	393.053	720.925	245.484	432.007	200.319	196.447	440.364	441.674	288.867	152.222	225.803	356.716	162.358	480.362	281.815	310.638	281.422	301.86	551.096	212.42	598.831	366.357	272.441	688.493	639.145	403.867	185.815	111.41
ENSMUSG00000004748	166.322	131.024	137.301	43.6807	49.8497	97.7602	135.535	145.566	94.7793	112.326	194.121	246.414	229.988	184.126	187.171	170.439	249.933	42.2556	190.532	111.086	200.023	80.8191	156.664	42.2776	90.5232	106.584	167.21	146.179	52.2786	142.344	184.634	196.929	157.8
ENSMUSG00000004768	210.585	133.62	149.034	122.704	130.951	249.524	188.876	214.027	232.157	147.618	196.288	392.078	281.382	200.085	192.725	184.14	242.274	146.219	155.964	216.833	265.501	123.08	137.297	248.709	176.127	181.958	168.021	203.575	141.637	142.698	202.992	172.634	159.717
ENSMUSG00000004771	511.63	453.608	429.455	751.387	696.22	569.569	543.708	453.448	630.199	558.019	444.616	633.193	578.149	571.569	529.077	535.333	693.242	856.041	649.714	744.811	555.341	712.97	496.515	693.169	536.306	725.402	489.517	508.906	716.615	532.193	552.392	490.852	490.56
ENSMUSG00000004788	887.596	761.095	607.562	344.608	611.688	581.921	750.746	895.648	641.265	1132.02	739	839.825	644.766	990.477	802.044	686.816	864.162	466.697	885.511	684.744	703.249	609.187	806.989	340.2	1013.48	553.041	816.001	830.332	493.113	838.822	705.277	1049.61	717.949
ENSMUSG00000004789	3120.55	2402.23	2004.99	1790.51	2047.32	2207.96	3061.97	2480.9	2094.98	2011.62	2307.83	3049.75	2773.5	3145.84	2157.96	2549.26	2727.52	2138.15	2635.59	2347.38	2758.41	2242.62	2428.39	1565.25	2914.6	2858.15	2256.83	2701.17	1773.35	3158.77	2301.51	2447.73	2288.36
ENSMUSG00000004791	6.45727	11.6054	8.49102	46.8882	50.7115	36.3856	14.7715	21.1655	24.8019	17.5159	11.1826	14.9621	6.55032	23.7968	17.1788	9.44143	10.3266	46.0298	5.64101	34.5713	7.48172	48.2667	19.7843	41.6517	42.1112	39.4897	11.3484	15.4312	67.5638	21.0579	15.8228	21.5509	14.1705
ENSMUSG00000004798	577.508	496.673	377.932	801.062	667.039	690.712	604.526	485.329	750.656	177.41	575.689	526.906	539.5	532.543	300.45	487.735	477.957	1001.23	401.225	727.033	474.201	823.944	464.566	684.67	419.656	768.813	394.58	558.371	855.969	466.16	444.015	502.436	386.531
ENSMUSG00000004814	6.21368	0	0	12.53	3.3171	3.11045	0	2.9702	4.69208	2.94964	3.16865	3.14949	3.18184	1.54994	4.94505	3.21033	4.8642	2.84828	6.33293	1.57344	7.82628	0	1.55464	4.54016	0	17.4352	0.475027	1.85019	6.29954	1.54178	3.13475	0	0.474525
ENSMUSG00000004815	268.196	236.28	165.929	460.805	495.642	418.586	318.384	305.654	414.819	215.405	290.991	249.803	254.12	383.43	209.179	339.732	165.719	413.824	204.43	422.751	332.711	533.794	249.045	314.407	209.9	421.233	212.681	296.8	465.78	263.214	310.681	287.475	289.575
ENSMUSG00000004821	0	0	0	0	0	0	0	0	0	0	0	0	0	0	0	0	0	0	0	0	0	0	0	0	0	0	0	0	0	0	0	0	0
ENSMUSG00000004837	433.924	1018.18	589.493	2801.7	2335.28	1465.74	789.316	484.501	1567.74	475.384	849.853	548.217	461.119	595.692	536.015	551.015	508.953	2579.09	704.173	1510	560.957	2325.55	753.209	1154.41	690.209	1949.28	308.763	548.711	2089.86	662.839	672	559.087	640.025
ENSMUSG00000004842	1.06239	1.01718	0	0	0	0	0	1.00568	2.11339	0	1.40359	0	0	0.741361	0	1.87595	2.03412	1.16041	0	0	1.0701	0	0	1.59152	0	2.32652	1.11256	0	1.29599	0	2.89201	0	0
ENSMUSG00000004843	444.66	336.827	357.215	567.248	580.143	473.979	453.254	375.945	470.034	355.093	420.788	502.927	570.828	468.604	440.518	443.281	494.126	740.181	577.283	578.454	508.562	566.783	332.93	530.001	502.091	671.148	404.314	436.858	586.551	427.604	495.942	315.11	410.481
ENSMUSG00000004846	544.688	403.824	522.454	542.919	541.517	581.361	569.444	460.083	645.905	186.662	543.388	539.016	463.461	606.199	446.353	627.788	536.902	670.419	538.164	565.262	507.251	601.886	489.968	527.283	442.035	705.505	479.87	440.769	576.494	600.949	491.813	558.937	451.296
ENSMUSG00000004849	984.455	810.944	637.87	364.827	464.4	581.012	972.454	757.954	613.759	915.593	729.84	937.009	1074.91	846.075	783.208	632.618	1010.63	427.668	948.053	536.125	938.003	669.164	730.324	359.09	853.111	581.504	733.745	783.547	362.101	921.78	939.908	816.171	754.566
ENSMUSG00000004864	0	0	1.43615	6.23562	12.8724	1.81254	0	1.73082	2.66589	3.64365	4.18174	0	0	0.90319	2.85513	0.926485	5.71617	8.83242	0	7.00565	4.07338	3.39065	0	5.26601	0.897199	5.42249	1.54611	0.903644	12.5626	1.79688	1.41683	2.04146	2.82618
ENSMUSG00000004865	3175.33	2698.97	2119.16	2086.07	2192.59	2521.04	3204.21	2813.65	2594.39	1814.96	2614.38	3794.08	3549.84	3313.82	2200.11	2684.77	3136.94	2270.6	2803.63	2554.92	3430.1	2454.6	2696.08	1860.97	2370.83	2997.03	2629.91	3100.35	2305.2	3202.01	3282.49	3017.87	2430.6
ENSMUSG00000004872	0	0	0	0	0	0	0.99263	0	0	0	0	0	0	0	0	0	0	0	0	0	0	0	0	0	0	0	0	0	0	0	0.995013	0.942222	0
ENSMUSG00000004880	4406.3	5613.65	4199.73	1827.56	1527.93	2943.3	3641.92	6120.05	3561.82	5029.47	5751.59	6018.59	6730.53	4732.86	5543.34	5326.92	4480.72	1819.99	4644.15	3447.18	6523.81	3416.11	5393.61	2025.6	4910.95	3989.63	5869.89	4989.33	1573.32	4823.38	6732.17	7173.42	5252.35
ENSMUSG00000004885	0.885563	0	0	0.892873	1.51018	0.886595	0	1.69324	2.60799	0	0	0	2.69497	0	1.8324	0	0.901225	0	1.80511	4.45004	0	2.66345	1.47783	0	2.63314	0	0	1.47409	0.894453	1.4656	1.78703	0	0.906901
ENSMUSG00000004891	840.526	785.317	183.394	129.991	210.764	451.923	1067.23	606.135	534.9	236.46	204.242	245.549	263.468	685.088	185.28	195.38	204.76	139.092	219.473	587.484	233.689	270.258	789.892	298.819	374.176	550.413	196.256	782.699	181.518	841.687	204.98	791.398	262.065
ENSMUSG00000004892	0	0	0	13.4942	1.6124	2.36771	0	0	0.773871	0.7484	0	0	0	0	0	0	0	0	0	4.90456	0.79922	3.14245	0	0.790113	1.8461	1.57255	0	1.85931	2.38866	0	0	0	0
ENSMUSG00000004894	0	0	0	0	0	0	0	0	0	0	0	0	0	0	0	0	0	0	0	0	0	0	0	0	0	0	0	0	0	0	0	0	0
ENSMUSG00000004895	702.123	669.938	559.747	442.452	540.563	595.327	628.298	694.812	678.604	545.825	598.71	729.754	662.223	754.665	593.78	648.979	661.349	510.206	650.269	776.096	675.835	613.945	597.078	497.151	686.128	644.242	648.027	634.945	559.766	683.163	631.815	741.552	662.491
ENSMUSG00000004896	526.667	417.735	360.072	439.99	500.736	402.918	326.522	438.883	452.077	372.846	514.616	520.192	385.117	483.284	341.696	504.714	358.208	477.256	358.894	559.395	381.198	575.693	329.283	438.279	418.121	516.696	283.404	405.923	481.21	355.606	291.438	599.261	560.311
ENSMUSG00000004897	8329.53	8014.14	5277.13	1590.2	2653.98	4513.29	7001.61	9663.5	5852.03	6707.72	7030.45	9366.29	9383.78	8635.48	7874.88	6697.03	8271.09	1481.92	8331.75	6410.34	9559.2	4157.93	6712.07	2349.48	7478.81	4718.11	8751.46	7338.4	2150.57	8550.43	7900.87	9500.94	7023.87
ENSMUSG00000004902	5.91679	5.72598	6.05131	2.98284	0	1.97453	0	9.42757	0.968058	43.0668	2.98855	3.99868	11.0037	6.88743	8.16192	7.06507	12.0428	1.01029	10.0505	2.99653	10.9973	0.988645	5.92144	0	29.3217	1.96715	4.04384	6.89088	1.99206	7.82993	3.97996	1.88452	11.1088
ENSMUSG00000004929	848.105	745.075	869.398	163.895	190.805	634.434	890.155	769.639	659.099	491.768	831.49	1036.73	927.323	1101.62	739.476	847.788	1012.18	163.041	772.103	629.593	1030.85	397.835	911.648	269.612	641.59	525.246	841.483	884.8	268.401	1035.88	919.755	1101.26	902.872
ENSMUSG00000004931	202.606	129.59	318.927	265.262	366.066	260.914	154.201	178.342	258.819	108.287	258.517	349.788	269.389	226.58	286.864	352.445	331.992	340.423	291.518	298.13	340.576	250.827	192.071	203.609	188.748	236.992	305.394	134.926	227.744	170.166	217.106	198.576	322.395
ENSMUSG00000004933	101.223	137.467	58.2951	331.87	310.507	194.989	78.3889	78.4261	157.479	122.154	92.2835	50.1747	37.7329	80.83	45.4282	93.6675	59.0256	192.782	53.4728	189.509	51.7572	286.831	128.935	148.704	159.883	145.386	60.8698	87.6787	196.583	123.021	38.1662	88.9615	89.4317
ENSMUSG00000004934	407.232	516.998	174.165	189.75	255.956	340.345	492.233	387.624	354.037	280.34	374.647	394.073	338.97	297.002	302.399	364.049	298.647	328.131	229.107	525.367	352.73	321.305	204.966	263.925	264.073	325.275	213.314	239.198	310.148	331.793	282.189	480.421	339.152
ENSMUSG00000004936	757.015	791.639	736.485	1117.01	1213.37	1150.07	720.694	753.655	1194.41	487.917	726.211	1106.93	896.605	717.962	615.648	718.916	859.179	1414.58	928.724	1106.88	928.599	1128.93	723.954	1194.41	756.988	1190.68	740.21	642.171	1046.23	756.206	756.135	857.142	739.24
ENSMUSG00000004937	1248.18	954.472	904.826	737.29	865.68	970.285	936.391	1075.89	1086.05	759.463	963.531	1141.35	949.686	1154.48	1012.57	1026.56	1038.52	882.007	1007.67	1022.9	1090.68	997.798	1060.2	695.843	930.696	1010.05	988.636	1045.02	782.023	1125.42	981.029	1160.69	1067.41
ENSMUSG00000004939	0	0	0	3.9771	0	0	0.992643	0.942741	0	0	0.996199	1.04708	1.00034	0	1.02022	0	0	2.02582	1.00515	0.998905	0	0	0	0	0.977387	2.9204	0	4.34059	0.996039	0	1.98998	0.94225	0
ENSMUSG00000004945	434.327	391.023	320.697	269.14	363.402	331.51	377.877	433.352	435.341	823.229	349.652	445.031	465.534	421.016	379.426	355.549	476.914	343.04	450.117	468.624	460.992	424.073	365.656	262.635	423.511	407.712	381.668	367.479	295.629	440.695	371.228	408.596	384.83
ENSMUSG00000004947	631.828	515.527	400.648	344.136	420.601	475.563	514.768	569.919	495.521	311.45	455.464	593.804	508.825	629.046	414.618	406.701	479.694	468.667	550.438	632.989	553.35	477.232	507.35	392.615	592.725	429.938	502.371	535.217	419.979	693.427	481.522	572.691	485.051
ENSMUSG00000004948	0	0	0	0	0	0	0	0	0	0	0	0	0	0	0	0	0	0	0	0	0	0	0	0	0	0	0	0	0	0	0	0	0
ENSMUSG00000004951	51.3068	42.0134	32.2914	87.5441	127.142	53.3421	40.7178	57.3052	133.664	35.5964	22.9249	39.0082	18.0159	56.114	19.3952	44.4335	31.1275	125.605	40.2241	136.794	44.8874	142.442	45.316	79.1131	205.26	101.364	24.2764	31.5184	55.8079	83.597	21.9017	44.3101	34.3552
ENSMUSG00000004952	363.522	232.169	228.853	880.004	942.752	876.236	519.7	310.325	821.726	214.395	299.946	281.776	291.851	237.016	181.051	359.749	290.44	1259.65	257.045	939.275	306.186	890.283	320.085	978.832	360.877	1086.13	283.241	253.377	1118.83	328.545	312.032	257.65	388.065
ENSMUSG00000004961	0	0	0	0	0.698665	6.93651	0.687602	0	0	0.648599	1.38024	0	0	0.681631	0	0	0.695219	0	7.06139	0	0.692595	0.684898	0	0.6847	0.677112	0	0	0	0	0	0	1.30552	7.09541
ENSMUSG00000004980	23369.7	16196.6	19331.7	11858.3	14838.3	18225	26310.8	16710.1	15654.1	9365.66	24282.4	34349.7	37168.5	23502.9	26558.7	25018.9	29722.5	13821.2	28373.4	23485	31528.6	17690	20842.3	11701.9	19062	20201.1	29068.7	22334.7	13046.4	22954.8	31437.9	15494	25999.7
ENSMUSG00000004988	0	0	0	0	0	0.886596	0	0	0	0	0	0	0	0	0	0	0	0.822881	0	0	0	0	0	1.15938	0	1.15375	0	0	0	0	0	0	0
ENSMUSG00000004994	113.098	87.8707	105.819	170.513	154.576	198.25	170.556	110.438	102.49	100.761	142.806	168.997	125.42	103.539	118.706	66.1558	111.192	147.332	143.895	166.241	133.914	149.574	162.161	200.81	147.174	162.929	126.149	129.12	182.573	145.675	128.229	131.893	172.124
ENSMUSG00000004996	752.397	661.586	464.188	342.613	567.55	537.58	547.714	742.806	733.708	698.352	581.592	529.316	521.426	827.751	563.616	556.511	598.95	334.209	513.838	573.569	562.331	507.827	667.885	271.218	635.7	445.705	548.227	689.786	369.621	744.674	480.561	673.505	592.964
ENSMUSG00000005034	2505.03	2095.51	1478.41	2155.22	1800.8	2734.92	2242.68	2591.95	2276.66	1829.07	1973.1	2992.31	2833.74	2276.02	1509.75	1666.78	2289.03	2463.85	2169.84	2602.12	2682.47	2642.21	1665	1955.46	2469.54	2427.29	2177.24	1981.11	2357.85	1907.3	2477.78	2352.77	1998.05
ENSMUSG00000005043	130.465	200.23	133.197	721.711	844.685	667.518	183.944	161.343	787.194	73.3561	167.243	314.787	118.095	193.767	50.2615	225.839	162.002	756.826	167.082	416.446	149.007	971.372	199.711	606.444	61.5323	622.185	145.28	144.324	821.1	100.361	110.375	268.056	183.304
ENSMUSG00000005045	3.27923	3.96692	6.20374	6.61263	2.44558	4.85836	199.42	3.81008	8.85252	0.778186	1.2255	0.831062	6.65296	8.17973	3.76538	2.51719	4.17149	4.97162	5.01329	2.49108	201.557	3.64869	4.10219	2.46503	4.87529	7.35104	7.55561	1.63674	2.48409	201.444	5.7902	2.31836	3.35822
ENSMUSG00000005054	356.978	268.166	279.369	392.739	500.223	349.496	356.333	330.908	504.355	641.321	343.685	430.855	396.133	310.918	384.631	357.292	433.54	609.216	478.405	518.396	349.914	457.74	262.517	472.442	381.182	409.168	307.333	257.916	456.179	361.156	310.435	344.864	347.404
ENSMUSG00000005057	67.9284	172.914	59.1218	288.758	144.563	292.262	72.3682	180.257	322.118	39.5062	260.66	72.0639	49.5711	79.5869	55.6158	62.9341	61.943	214.483	62.8696	249.622	60.4287	146.638	181.356	135.766	54.1417	154.399	44.8498	77.1238	338.215	47.2453	56.8825	78.069	72.7009
ENSMUSG00000005069	429.915	450.581	351.787	523.974	561.599	540.029	342.892	610.086	515.495	277.457	379.136	480.618	455.734	513.745	356.81	524.257	438.351	630.933	532.905	510.884	425.137	676.248	405.538	393.324	530.479	558.758	359.831	397.767	444.824	529.495	396.241	578.325	405.57
ENSMUSG00000005078	160.572	129.718	137.672	204.427	271.655	238.657	267.168	160.09	201.476	199.783	133.967	191.839	260.253	248.617	174.204	154.2	179.053	370.977	234.271	292.467	198.714	297.598	228.244	204.036	171.034	359.258	151.539	163.618	264.325	144.688	149.433	171.908	204.731
ENSMUSG00000005087	1575.35	1633.29	1314.32	1488.28	1317.83	1630.77	1627.14	1812.88	1619.84	1510.31	1557.7	2063.86	1871.83	1617.34	1340.93	1489.87	1705.62	1912.15	1584	1794.74	1925.19	1698.24	1586.67	1675.39	2222.28	1812.29	1663.18	1773.21	2005.09	1848.97	1716.14	1892.58	1460.39
ENSMUSG00000005089	25.3352	8.83999	29.3739	107.926	103.167	115.579	109.818	14.185	103.915	14.0572	30.1025	52.6991	12.1628	31.8397	19.769	11.0264	30.6019	126.596	32.3097	83.816	6.10702	94.2131	18.4554	81.156	5.80854	100.372	10.4724	17.2268	80.8993	4.76863	21.5702	4.70425	22.7117
ENSMUSG00000005102	1089.4	1213.95	656.293	387.09	709.576	832.229	1382.36	1211.67	747.679	717.868	1092.15	1158.89	1362.94	1184.16	895.191	775.825	1144.24	526.818	1093.12	633.502	1446.8	854.496	1084.76	408.695	1049.76	828.248	1067.48	1076.03	502.299	1114.86	1150.11	1204.32	1000.13
ENSMUSG00000005103	3741.42	2833.69	2646.68	4301.5	4119.62	4361.5	4467.11	2798.85	4221.05	1812.59	3155.62	3974.14	3260.83	3459.7	2687.69	2320.28	3144.7	4807.97	2639.93	4221.35	3210.05	4795.54	3414.98	3594.22	2897.71	4173.64	2663.5	3289.98	4481.08	3692.35	3062.51	3033.49	3377.74
ENSMUSG00000005107	107.327	90.0298	92.1284	159.42	218.434	214.874	131.02	91.5568	183.878	108.664	98.7505	99.0986	105.35	126.713	66.0598	73.323	103.13	206.06	100.675	197.025	110.586	220.96	66.845	148.438	122.34	133.383	103.401	105.141	129.631	63.4369	89.5658	98.1187	102.686
ENSMUSG00000005124	11.2051	5.00476	14.1044	24.3333	37.0226	18.9844	10.4107	15.0998	10.1535	25.771	16.5436	27.9602	21.8586	27.0835	16.0513	11.4683	21.052	46.0845	23.7186	23.5719	17.4766	71.1786	5.17564	19.8694	5.12578	11.176	18.5562	8.60419	61.5006	42.7444	15.654	9.88291	15.0058
ENSMUSG00000005125	474.217	175.253	458.233	956.89	663.804	592.947	302.067	746.077	464.183	275.287	266.047	158.523	393.635	620.826	215.798	384.551	308.931	1283	302.774	773.595	133.408	799.347	217.019	643.225	875.54	1080.73	317.546	512.376	1218.53	322.543	357.461	305.942	246.073
ENSMUSG00000005131	0	1.17024	4.44649	4.59487	1.51595	0.481734	0.968633	1.41712	4.47367	2.8146	1.2216	3.00532	3.13012	0	1.49344	6.21489	4.91417	11.751	1.51075	4.27135	4.50838	0.964777	0	1.44677	1.4307	5.91045	7.00308	0	8.98307	1.47122	0	5.11079	1.51801
ENSMUSG00000005142	2323.68	2015.96	1460.48	3499.13	3350.44	3006.13	2574.5	2150.39	3136.1	1015.65	1742.57	1869.68	1658.96	2214.56	1343.1	1864.22	1775.26	3749.07	1654.87	3317.26	1775.22	3237.03	2141.31	2863.13	2042.8	3228.25	1664.32	1862.22	3527.65	2020.91	1816.21	2123.96	1798.93
ENSMUSG00000005148	1.13035	1.09389	1.93951	5.73615	10.6669	4.74651	4.06013	1.08065	7.44649	0	0	0	3.84746	4.7303	1.16945	3.88191	2.30066	9.71444	0.966432	5.76244	0.96129	4.75308	0.948913	3.8014	3.75916	6.62018	0	3.7862	8.6194	0.94109	1.14051	0	0
ENSMUSG00000005150	418.65	385.233	255.857	188.295	355.009	330.477	301.127	331.84	413.611	262.249	365.311	358.799	286.817	338.637	423.78	390.322	401.457	275.825	308.487	432.507	303.784	312.66	287.149	225.017	357.238	435.3	369.919	367.909	207.339	393.631	333.331	460.908	313.386
ENSMUSG00000005161	1521.45	1456.86	1324.51	966.549	1331.88	1271.73	1425.64	1519.27	1745.26	3087.14	1415.22	1748.6	1863.53	1610.46	1730.46	1412.47	1925.84	1092.17	1760.67	1925.95	1765.76	1452.85	1499.9	912.417	1494.4	1312.53	1675.82	1305.92	1034.52	1774.22	1433.99	1824.95	1463.85
ENSMUSG00000005198	5789.82	5693.6	3918.73	4785.94	4391.59	5529.49	5837.51	6681.84	5473.74	1657.81	4816.25	5156.1	5119.8	5969.74	2980.24	4830.24	3990.02	5092.45	4100.92	5268.15	4981.4	5575.12	5200.21	4095.83	6103.2	5657.49	4242.51	6030.51	4549.38	4643.21	4714.01	6151.27	4539.67
ENSMUSG00000005202	0	0	0	0	0	0	0	0	0	0	0	0	0	0	0	0	0	0	0	0	0	0	0	0	0	0	0	0	0	0	0	0	0
ENSMUSG00000005204	1631.82	1311.96	1223.66	1392.84	1250.23	1213.83	1358.46	1374.22	1155.78	1288.82	1229.78	2151.38	1736.63	1587.38	1442.31	1426.25	1655.21	1179.5	1909.73	1643.67	1684.92	1051.91	1465.22	1093.86	1184.52	1408.73	1271.99	1636.37	1209.25	1572.35	1731.84	1777.03	1333.71
ENSMUSG00000005220	0	0	0	0	0	0	0	0	0	0	0	0	0	0	0	0	0	0	0	0	0.999786	0	0	0	0	0	0	0	0	0	0	0	0
ENSMUSG00000005225	124.114	22.9221	49.4347	67.6729	84.079	41.9034	73.4025	55.1566	51.957	63.0146	37.5039	70.496	80.0739	88.8777	51.2347	59.5215	85.2901	98.0467	71.9469	85.2531	58.645	69.6563	95.1642	75.9688	73.6951	62.1996	54.3648	95.0035	61.395	61.9237	73.4109	55.8317	59.4768
ENSMUSG00000005232	0	0	0	0	0	0	0	0	0	0	0	0	0	0	0	0	0	0	0	0	0	0	0	0	0	0	0	0	0	0	0	0	0
ENSMUSG00000005233	342.297	376.116	318.141	61.5045	131.054	196.727	475.17	351.819	256.27	532.439	416.305	581.242	768.906	344.35	525.256	392.26	555.231	28.2851	647.698	263.668	660.477	175.591	423.013	120.531	450.792	263.447	532.793	455.181	94.9564	428.221	678.155	469.464	431.223
ENSMUSG00000005237	95.9973	9.04687	22.0964	20.6286	29.1299	225.568	6.273	23.0878	16.8244	23.6677	6.29586	7.81813	7.11246	22.5413	4.0298	25.3021	9.51382	76.3435	12.7037	48.1334	82.3178	12.4962	4.67786	73.4325	36.2901	8.54706	8.48602	74.8076	45.6373	16.2371	11.2159	15.6318	6.38232
ENSMUSG00000005251	6.90292	0	1.00857	12.9256	13.1107	6.91095	3.97033	6.59931	3.87224	1.87242	1.99234	3.99862	1.00036	4.91957	1.02023	2.01864	2.00713	18.1855	6.03028	3.99532	5.99856	4.94318	1.97382	8.89536	5.86436	11.8029	3.03284	2.95325	3.98412	0.978726	2.98493	1.88446	4.03958
ENSMUSG00000005262	528.455	559.869	472.044	629.426	855.175	933.738	831.223	572.633	694.384	604.179	463.599	449.663	626.155	788.525	583.282	740.539	541.934	716.658	486.934	624.55	574.754	583.366	547.405	452.686	759.672	693.42	508.217	818.51	831.539	642.708	657.314	708.265	537.446
ENSMUSG00000005267	78.4281	87.1849	59.5298	171.072	155.752	137.144	100.983	71.7566	152.764	57.1883	76.8169	64.7577	70.3803	99.6347	64.2685	86.8142	79.7056	214.123	81.6659	155.912	78.8435	175.138	91.7983	131.541	72.2073	177.256	70.926	85.1909	162.68	63.9551	80.8311	105.029	87.4505
ENSMUSG00000005268	2.9564	14.4643	22.2519	12.5242	60.0223	5.17996	8.46709	3.53302	5.27107	8.85795	0.746603	2.44629	4.49862	8.11209	7.08514	3.02597	3.00867	15.5848	3.01327	6.73775	3.02444	44.1086	17.0473	5.92638	21.6831	66.8799	0.757716	3.67813	8.2649	8.80302	7.92522	4.56088	3.02768
ENSMUSG00000005299	1042.63	835.403	690.382	810.663	814.128	958.49	1178.19	1047.55	986.42	668.105	810.159	1202.12	871.369	1203.79	974.422	786.908	1072.97	826.333	840.141	924.828	1005.42	1045.86	1047.93	691.868	1187.05	919.098	765.408	1022.06	766.847	1001.72	825.364	1159.03	833.63
ENSMUSG00000005312	2662.78	2065.6	1956.97	1627.44	1701.71	2373.36	2373.46	2394.89	2277.07	1226.96	2096.66	3182.45	2494.08	2803.56	2198.48	2317.08	2544.84	1891.85	2317.49	2183.7	2793.63	1912.45	2314.78	1783.55	2354.25	2163.59	2363.75	2053.5	1834.06	2972.58	2215.77	2356.63	2437.8
ENSMUSG00000005320	2.53675	14.5694	6.05363	15.3461	10.3773	3.38628	5.95772	1.61674	6.64063	0	2.56261	15.2616	0.857723	3.37474	0	3.46182	11.202	11.2621	4.30903	13.7036	7.73048	16.1069	0	3.39002	0	9.27733	1.73374	5.06464	28.4663	0	0.853191	4.03981	1.73195
ENSMUSG00000005338	10.4787	42.549	81.8735	218.173	194.498	179.655	74.6174	25.9374	94.088	9.91516	44.4684	38.9485	24.2225	27.5974	45.6081	33.8756	62.2259	202.097	38.8645	156.619	33.2219	184.845	30.8374	188.709	10.9504	214.402	37.8314	15.6209	200.635	22.5503	43.7775	28.8278	37.5419
ENSMUSG00000005339	0	1.66964	1.14525	6.95814	5.72604	2.59094	1.1271	1.07054	4.39706	2.12627	1.13121	0.874486	0	1.11729	2.67744	1.1461	0	11.4893	1.14127	3.49504	0	5.18903	0	11.2399	2.56499	5.16245	0	1.11783	1.7426	1.11141	0	1.06997	2.29356
ENSMUSG00000005354	2469.53	1611.34	2068.18	1219.31	2040.71	1687.01	2206.04	1566.88	1977.76	1665.81	1886.46	2688.44	2459.45	1863.14	2339.84	2100.87	2596.83	1477.17	2755.03	2554.24	2820.06	2063.63	1971.67	1362.55	1876.87	1728.86	2448.94	2088.12	1279.16	1850.6	2002.09	2088.82	2033.32
ENSMUSG00000005355	0	0	0	0	0	0	0	0	0	0	0	0	0	0	0	0	0	0	0	0	1.99954	0	0	0	0	0	0	0	0	0	0	0	0
ENSMUSG00000005357	0.934308	0	0.955568	1.88409	0	1.87084	0	0.893251	1.83441	0.887033	0.943875	0.947149	0	0	0.966651	0	1.90169	4.38019	0	2.83911	0	2.81014	0.935083	0.93647	0	1.86383	0.957838	0.932707	4.71854	0	0	0	0
ENSMUSG00000005360	236.853	129.595	239.741	671.643	641.933	357.676	240.244	181.806	545.391	88.6361	153.318	161.645	329.373	162.922	157.844	215.556	177.751	1160.43	282.217	443.719	189.384	555.816	247.514	545.405	105.516	682.634	148.123	255.423	398.197	137.295	167.57	129.355	241.383
ENSMUSG00000005362	459.591	454.987	313.098	652.294	611.14	706.26	477.589	435.441	659.414	574.402	480.47	696.675	660.387	441.53	415.094	484.706	591.87	800.516	556.613	539.527	564.157	800.046	425.864	509.837	414.748	696.708	459.901	460.585	687.12	366.815	579.292	474.91	533.071
ENSMUSG00000005364	12.7133	18.4524	23.2241	250.544	164.524	144.69	39.2976	13.8885	137.368	19.8266	47.1292	25.5706	23.9472	18.6267	13.9732	25.6884	18.5147	187.61	16.657	117.384	28.6402	249.364	21.6823	80.0821	15.2987	185.319	32.1099	10.8766	167.039	26.7361	36.6448	13.0135	37.2183
ENSMUSG00000005370	1745.51	1634.43	1171.81	704.32	1029.37	1285.49	2065.97	1716.9	1606.79	919.888	1318.47	1700.32	2224.5	1528.52	1436.6	1301.03	1592.59	810.244	1348.36	1529.16	1786.23	1479.8	1959.96	808.143	1588.52	1416.41	1728.12	1998.82	1071.25	1757.59	1985.27	2013.92	1346.36
ENSMUSG00000005371	681.299	593.568	692.754	1483.77	1453.66	1188.93	792.707	750.716	1096.94	331.976	727.775	927.14	846.084	728.767	519.883	706.993	743.76	2104.14	866.626	1487.28	727.471	1625.07	557.736	1221.95	792.659	1586.95	731.072	580.662	1356.12	687.176	767.893	488.145	731.339
ENSMUSG00000005373	17.5502	10.6925	17.3135	187.167	91.5149	27.463	28.8188	29.5252	157.181	16.5249	28.5207	40.9705	18.3647	12.283	11.8583	59.0072	10.1707	344.663	37.8554	41.1621	32.3007	130.708	19.5675	24.2309	7.17739	260.877	5.94996	10.0017	10.2399	7.40614	17.5358	11.0201	32.4165
ENSMUSG00000005374	751.288	734.336	497.676	327.517	429.5	667.847	741.056	623.551	663.549	435.181	569.339	905.81	728.642	937.048	400.932	648.459	672.425	465.711	735.246	622.247	780.032	497.677	753.588	425.516	667.654	678.915	680.594	692.051	362.728	767.54	582.594	877.272	618.237
ENSMUSG00000005378	849.559	756.69	639.512	379.407	532.241	588.401	766.218	943.888	819.844	1027.78	744.477	1053.81	1035.83	836.41	748.024	739.424	1003.36	370.69	957.38	876.34	976.941	627.973	764.671	390.687	653.128	828.882	789.784	780.573	375.124	989.663	924.161	996.723	867.917
ENSMUSG00000005397	900.516	934.495	858.533	1446.17	1213.71	1227.21	1463.21	1310.14	1237.55	384.452	827.592	1250.73	808.02	1163.14	647.314	843.399	910.132	2012.9	907.567	1199.29	1047.62	1225.39	1078.99	1274.08	1905.85	1631.36	773.937	1066.23	1043.33	1003.94	882.796	1072.43	782.669
ENSMUSG00000005410	4971.17	4387.38	3298.61	892.131	1221	2520.12	4433.12	3780.16	2676.09	3382.74	3909.96	4725.34	4908.11	4703.43	4518.03	3572.06	4646.45	556.959	4388.78	3005.67	5020.91	2067.39	4322.92	1229.71	4518.02	2834.05	4570.62	4209.66	1281.19	4809.12	4559.56	4745.49	4257.19
ENSMUSG00000005413	1537.62	688.439	761.319	695.491	812.824	1052.68	1534.36	1588.53	4724.23	1307.22	710.708	1206.46	811.211	3183.07	940.034	948.662	1296.13	791.759	1267.81	1324.58	875.4	486.937	930.923	851.664	2309.39	807.331	573.376	2388.5	1105.03	2320.72	777.17	1130.66	671.051
ENSMUSG00000005417	2080.47	1685.12	1400.14	2549.1	2150.86	2420.51	2133.83	1883.5	2719.19	1014.19	1468.92	1815.49	1480.84	2013.85	1044.55	1538.5	1798.1	2517.35	1757.75	2441.06	1644.67	2308.13	1519.06	1931.54	1683.32	2630.22	1487.94	1882.04	2307.4	1626.36	1369.55	1947.47	1372.92
ENSMUSG00000005442	3479.74	2772.76	3372.9	3954.75	2738	3347.97	2744.41	1931.23	2653.57	739.304	2104.2	2681.1	2043.06	2441.03	2134.68	3010.87	3278.03	2348.58	2930.46	2732.87	3229.89	2384.07	2360.84	2353.58	2621.13	2749.07	2277.43	2347.69	4286.71	3163.78	2056.93	2591.16	2550.65
ENSMUSG00000005447	1196.54	1028.86	998.091	238.963	384.02	610.643	585.4	1159.17	686.704	1659.14	1093.67	1153.94	1302.79	1227.29	1438.36	1180.59	1377.13	210.706	1384.84	769.761	1416.34	484.928	931.385	262.389	1362.1	631.733	1214.91	956.01	365.602	1214.52	1010.86	1102.84	1056.64
ENSMUSG00000005465	93.8587	228.229	302.924	1711.77	1851.52	1206.92	251.937	144.652	1260.15	56.2913	326.235	249.694	154.305	114.835	150.761	337.917	194.223	1658.77	198.392	1092.91	150.752	1489.28	196.65	1186.79	57.6716	1161.85	195.705	177.158	1837.5	67.6684	160.24	196.458	361.879
ENSMUSG00000005469	493.101	495.732	376.352	685.715	722.261	687.452	509.87	497.75	782.896	276.66	521.11	533.735	529.495	476.611	409.999	495.793	443.377	940.957	447.635	724.437	561.04	829.105	460.571	508.728	339.29	738.694	496.51	521.313	643.144	520.855	436.574	536.714	449.792
ENSMUSG00000005470	1473.75	1788.19	1042.98	267.522	243.501	663.091	1261.28	1378.32	704.033	1217.48	1166.25	1454.54	1733.72	1473.59	1204.74	1212.34	1443.14	73.6179	1439.88	777.876	1616.17	403.903	1472.75	355.246	1197.87	618.01	1414.32	1539.71	271.068	1661.54	1482.08	2205.81	1380.96
ENSMUSG00000005474	0	0	0	1.00437	1.30236	0.79284	0	1.32416	1.55481	1.315	0.800004	0.532365	2.02099	1.2706	0	0	0	0.811341	0.807119	1.40293	1.40421	2.58656	0	0	0	0.993568	0	0	1.39898	0	0	0.951826	0
ENSMUSG00000005481	3641.33	3212.02	3129.75	1009.32	1563.12	2271.78	3406.38	3657.9	2616.19	5087.89	3372.13	4487.09	4626.6	3908.36	4509.42	3349.78	4483.61	958.341	4023.03	2575.62	4623.39	2132.84	3384.65	1196.42	3741.66	2219.29	4038.75	3313.62	1310.72	3765.91	3880.57	3691.53	3758.09
ENSMUSG00000005483	593.939	632.16	476.704	573.66	593.953	699.01	550.772	637.35	617.494	688.404	581.887	824.386	629.82	659.879	447.638	521.107	669.488	1323.67	666.957	1460.83	655.981	690.093	559.963	721.142	576.128	634.576	524.215	601.739	703.931	636.338	589.351	793.376	565.958
ENSMUSG00000005493	22.4437	11.9348	12.9295	29.6011	25.0745	23.3247	14.4686	13.2401	22.7896	7.13999	13.2702	19.512	14.8174	23.5217	14.8068	19.0849	18.5017	33.6905	18.0061	27.2193	21.7589	27.2326	19.4465	22.3255	21.948	31.2877	16.6255	15.5973	18.542	20.9084	17.5458	10.3364	9.00866
ENSMUSG00000005501	303.603	258.052	304.111	426.427	340.93	346.076	304.575	270.776	350.388	148.813	321.811	368.414	405.051	400.971	293.716	370.104	443.599	358.18	354.829	327.855	356.981	409.825	276.957	423.873	240.945	406.871	250.179	232.58	454.826	279.71	363.953	311.042	414.501
ENSMUSG00000005503	0	0	0	0	0	0	0	0	0	0	0	0	0	0	0	0	0	0	0	0	0	0	0	0	0	0	0	0	0	0	0	0	0
ENSMUSG00000005505	356.25	338.269	264.614	268.125	266.701	315.967	390.722	298.405	388.842	156.004	358.087	335.056	262.933	329.65	210.665	238.059	271.837	416.685	293.155	422	269.583	494.568	188.706	271.332	326.412	499.504	251.241	425.168	345.059	298.101	375.145	424.051	384.668
ENSMUSG00000005506	4559.62	3668.74	3615.4	2411.19	3637.84	3466.68	4577.23	3647.12	3933.72	3221.76	2879.33	5093.01	4724.04	4645.88	2376.66	3963.31	4651.7	3008.49	4566.85	2845.43	5445.86	2962.52	3169.61	2849.85	4090.52	3991.02	3542.39	3738.33	3166.71	4466.6	3928.11	5222.42	3750.15
ENSMUSG00000005510	1041.81	941.333	839.044	662.828	929.135	730.692	898.889	1060.45	1085.68	1251.07	992.052	1051	1153	1010.77	1240.69	997.78	1203.23	804.134	1206.3	1141.04	1134.8	908.538	928.29	586.869	1050.8	880.156	1007.43	822.224	608.845	1017.27	938.173	1083.6	1151.68
ENSMUSG00000005514	875.19	741.404	595.107	1003.76	721.512	822.558	745.989	949.472	1010.33	393.312	676.357	958.446	866.353	863.13	477.914	742.81	766.113	1435.23	873.674	873.113	932.194	1020.07	893.697	652.937	893.216	1248.25	608.192	856.465	647.49	772.514	738.099	834.973	811.715
ENSMUSG00000005533	349.565	459.023	76.414	437.017	415.426	570.033	393.985	471.558	535.512	159.762	131.063	171.456	69.8358	694.051	41.1167	243.404	140.365	551.525	78.4439	406.519	199.092	651.57	315.053	635.435	568.664	576.529	118.857	364.894	450.174	449.857	82.7858	349.575	157.238
ENSMUSG00000005534	376.788	471.2	282.091	859.993	815.874	656.704	412.061	522.945	671.413	144.039	359.671	555.198	336.708	376.452	343.107	528.196	402.51	1176.49	537.517	685.933	478.582	997.375	389.164	615.625	659.873	1062.72	346.72	346.242	681.371	342.17	450.16	716.157	395.468
ENSMUSG00000005540	100.492	321.566	632.491	5263.08	5263.81	4070.97	737.964	234.146	4294.02	69.2551	840.831	570.937	399.971	155.16	202.927	678.991	362.586	5978.34	396.947	3098.84	413.612	4938.99	295.9	3907.24	75.7648	4535.35	333.662	278.272	4197.47	133.58	422.546	296.807	683.518
ENSMUSG00000005547	0	0	0	0	0	0	0	0	0	0	0	0	0	0	0	0	0	0	0	0	0	0	0	0.591506	0	0	0	0	0	0	0	0	1.71608
ENSMUSG00000005553	17.4331	22.9975	22.2953	2.44818	3.75058	10.3417	18.4098	48.3087	2.55133	48.6043	20.6554	22.0529	24.1672	10.8386	16.673	24.7515	14.291	0	29.6545	2.25638	33.0471	3.67855	38.6159	4.8673	26.3142	14.6316	32.2552	36.6958	10.0669	24.5616	8.61616	30.1296	11.7598
ENSMUSG00000005566	6952.38	5683.2	5239.75	2275.95	3299.35	4687.09	5350.36	6110.76	4698.71	3471.28	5781.14	7224.2	6506.58	7017.83	5990.59	5941.75	6174.75	2405.77	6211.14	5675.12	6707.25	3909.95	5786.43	2803.54	5985.22	4317.62	6387.93	5628.08	3273.65	6662.45	5727.59	6426.36	5997.42
ENSMUSG00000005575	1301.41	1221.49	1061.87	708.742	914.739	955.836	1149.05	1153.6	1094.58	924.211	1106.67	1448.66	1281.94	1366.1	1365.91	1237.51	1364.58	771.764	1462.25	1138.4	1463.11	1007.87	1159.37	686.121	1339.97	1046.64	1322.71	1162.46	706.467	1263.77	1275.21	1357.06	1206.27
ENSMUSG00000005580	53.5918	87.5522	40.6712	79.7963	59.0453	78.9881	72.0482	45.6215	86.691	24.2251	54.7962	61.0218	58.0826	46.2055	37.0283	55.8613	41.5001	68.2428	55.2839	71.2384	57.9903	79.7363	44.2303	89.2713	70.3776	117.597	34.21	60.539	79.9119	57.2302	51.1582	59.8462	44.38
ENSMUSG00000005583	1136.53	1498.14	970.098	2838.78	2033.17	2790.45	1850.53	1439.62	2718.43	1073.25	1164.03	1432.7	1473.85	1004.03	601.536	1102.04	1307.64	2746.99	980.442	2112.38	1136.73	3440.64	1269.07	1769.52	1963.91	2894.81	842.191	1186.81	1892.5	1270.08	1582.19	1020.08	1261.98
ENSMUSG00000005609	1143.7	668.08	688.284	938.529	854.487	726.336	968.767	1083.04	1053.91	501.138	695.057	1371.99	1470.43	905.961	951.057	1023.43	961.833	681.453	652.359	641.379	694.742	932.724	974.939	813.753	669.133	1209.74	759.722	755.029	494.829	1160.69	911.307	1124.89	988.848
ENSMUSG00000005610	17939.8	13365	13108.4	10993.7	9855.17	12903.3	16776.8	15817.1	12301.9	14529.7	14133.9	19564.9	17741.8	17316.2	12223	13170	17417.9	13921.5	16481.2	13648.4	17815.2	12682.5	14812.8	11974.9	16830.1	14189.8	14194.8	13884.1	11312.5	15057	16008.9	16696.7	13305.9
ENSMUSG00000005611	90.991	64.4652	63.583	224.34	120.587	209.828	146.614	70.4916	232.924	32.1328	113.809	76.2102	49.5888	81.0045	35.3753	126.544	58.0542	248.903	61.5764	201.841	67.6608	246.899	64.6012	313.928	58.9202	156.854	49.3366	64.7475	341.027	73.8015	44.3365	68.4454	114.048
ENSMUSG00000005615	343.34	401.351	309.233	476.04	367.542	588.312	571.308	453.68	531.051	266.548	384.021	496.728	374.571	403.782	283.288	370.407	433.745	711.181	432.07	617.517	371.641	568.695	292.249	509.808	457.939	712.212	302.539	327.73	564.388	346.611	380.168	387.846	336.317
ENSMUSG00000005621	1589.98	1911.4	1338.87	1753.69	1590.93	1916.52	1583.36	1916.71	1759.56	840.496	1552.64	1813.89	1133.28	1872.23	822.261	1165.98	1564.92	1991.45	1262.24	1706.89	1332.63	1953.17	1387.95	1484.93	1524.19	1625.35	1207.51	1660.73	1885	1570.05	1266.88	1811.44	1286.41
ENSMUSG00000005625	1700.74	1418.99	1221.3	1239.74	1292.89	1449.5	1640.94	1497.87	1634.78	1756.64	1316.48	1593.18	1596.94	1578.98	1544.11	1183.09	1815.76	1205.7	1679.26	1654.09	1710.05	1602.04	1366.95	1007.93	1830.53	1436.43	1336.22	1286.83	1457.23	1565.25	1457.71	1799.7	1394.08
ENSMUSG00000005628	16.3081	2.66092	3.19385	9.86601	34.8085	34.5682	11.6969	5.47686	17.9901	8.35867	1.63692	5.0328	8.6856	8.35669	2.27576	8.20983	5.05245	29.3196	16.1842	9.19459	5.234	28.4143	4.72059	8.65181	1.04889	3.77111	11.9648	7.09964	8.42826	1.82652	1.06778	14.4671	2.25268
ENSMUSG00000005640	15.3854	19.5421	28.9052	130.039	133.348	82.0906	43.1581	27.2702	62.7441	4.9836	41.0007	30.0313	16.5824	19.9023	15.9175	35.6681	18.5931	110.98	16.7149	100.319	13.6482	96.6294	19.2468	103.512	5.71835	114.516	22.6734	14.5539	131.116	20.9963	15.5235	22.9699	30.5275
ENSMUSG00000005649	0	0	0	0	0	0	0	0	0	0	0	0	0	0	0	0	0	0	0	0	0	0.941754	0	0	0	0	1.01097	0	0	0	0	0	0
ENSMUSG00000005656	980.6	944.968	481.397	703.375	657.178	835.694	862.51	780.061	599.013	860.702	661.602	1079.99	1040.79	909.782	529.573	668.706	771.156	700.466	961.447	1210.57	785.633	988.711	754.173	737.731	797.22	1044.05	756.704	813.889	711.523	1040.56	761.616	809.514	651.585
ENSMUSG00000005667	1350.73	1182.45	1148.37	562.094	533.365	765.802	1343.42	1304.92	893.983	1036.33	1248.4	1417.06	1468.31	1750.78	950.29	837.769	1055.58	722.883	1423.41	984.839	1725.25	1185.76	1267.13	516.684	959.61	889.125	1290.81	1394.99	929.474	1501.17	1378.1	1221.07	1394.46
ENSMUSG00000005672	33.3489	181.512	43.352	495.88	425.74	373.407	173.744	165.401	313.543	18.3687	177.26	143.891	119.996	240.194	119.99	111.385	130.572	513.374	136.403	428.949	145.494	368.632	48.1348	239.01	129.086	323.709	140.036	102.321	370.115	45.2513	159.918	117.56	61.9756
ENSMUSG00000005674	550.351	596.006	387.57	314.432	452.339	370.06	425.421	672.475	545.167	695.12	513.812	457.553	629.711	434.182	782.038	542.8	561.519	358.892	604.965	360.039	624.884	452.644	607.13	227.897	425.769	502.969	478.699	391.759	379.531	502.688	455.435	634.394	565.104
ENSMUSG00000005677	0	0	0	0	0	0	0	0	0	0	0	0	0	0	0	0	0	0	0	0.998864	0	0	0	0	0	0	0	0	0	0	0.994977	0	0
ENSMUSG00000005681	4.99643	3.86825	3.86607	4.76417	1.93296	2.0009	2.01163	3.61386	4.90485	5.69236	7.06638	1.01301	1.01368	6.97933	7.12923	8.18213	7.11869	5.11895	7.12925	5.06083	3.03929	5.00916	6.00045	1.00156	8.71075	0.996701	5.81296	3.99019	3.81804	4.68975	3.02479	6.68378	4.09349
ENSMUSG00000005682	1432.57	1268.68	1250.45	1214.01	1418.62	1312.54	1270.5	1602.45	1421.67	813.369	1498.2	1667.1	1596.34	1498.32	1271.89	1659.25	1370.07	1219.5	1492.93	1428.9	1681.04	1444.88	1380.25	954.169	1564.67	1532.83	1463.11	1399.23	1215.84	1393.99	1472.45	1322.71	1547.41
ENSMUSG00000005683	4215.65	3778.15	3095.23	2831.67	3273.51	3284.66	4015.02	4083.11	3640.9	2840.49	3209.71	4124.68	4021.28	4394.21	3325.97	3374.05	3717.26	3559.32	3724.78	3751.71	4158.02	3629.29	3899.29	2257.34	4249.72	3733.72	3461.56	3723.07	2652.36	3999.05	3606.79	4233.53	3557.74
ENSMUSG00000005686	345.839	429.14	289.046	216.641	371.921	195.983	363.261	245.392	190.899	78.4158	236.004	177.146	353.935	187.743	127.516	219.262	160.14	247.772	147.518	345.012	224.395	329.607	151.913	157.836	134.488	347.218	176.248	177.416	375.396	157.734	354.546	340.371	263.835
ENSMUSG00000005687	1053.89	991.135	812.506	583.353	805.58	866.843	1056.93	1099.89	1075.83	1397.34	941.014	1305.27	1203.94	1026.89	1171.3	1012.97	1222.78	763.28	1124.55	1084	1290.63	1049.5	905.16	640.4	953.583	896.208	988.445	1041.37	734.458	1012.08	1043.62	1112.27	996.653
ENSMUSG00000005696	14.5461	11.0216	29.7252	141.78	148.196	88.9774	17.7177	5.86274	75.3109	24.5781	18.7771	12.631	17.7737	32.8712	15.4083	17.933	23.2045	159.437	18.3498	77.5123	10.5647	124.817	13.8647	70.8018	6.0781	77.9566	25.7523	27.1874	124.974	6.95603	13.259	14.2826	25.3121
ENSMUSG00000005698	3555.97	4163.39	3066.65	1982.88	2045.86	3395.69	3395.44	4693.67	3151.78	2537.3	3493.57	4619.74	3842.65	3358.54	2628.84	2585.45	3651.46	2428.7	3187.14	2799.26	3715.81	2724.43	3097.91	1955.07	3504.92	3556.75	2795.46	3498.78	2380.8	3781.88	3256.09	4819.28	2924
ENSMUSG00000005699	103.518	100.212	40.3965	53.0164	63.0754	52.5832	57.327	119.828	79.1084	100.625	56.4347	61.1721	79.1268	128.288	85.7077	103.365	81.6011	89.7385	91.9097	80.8646	69.3187	74.3756	60.4742	67.193	52.4538	70.8261	99.9086	76.5254	66.6849	73.9811	62.6849	97.6955	61.6952
ENSMUSG00000005705	2.03215	0	0	2.04084	2.04135	1.00493	0	0	0	0.953035	0.995515	0	2.07473	2.0185	3.54076	2.10764	2.02949	0	1.03203	0	1.02463	1.00394	0	0	0.98164	2.00856	1.01763	0	0	0	0	5.45015	0
ENSMUSG00000005716	0	0	0	0	0	0	0	0	0.968057	0	2.98856	0	0	0	0	1.0093	2.00712	3.03092	1.00504	0.998844	5.99854	0	0	1.97674	0	0.983569	0	0	0.99602	0	0	0	0
ENSMUSG00000005718	813.51	736.642	452.915	194.12	268.403	435.858	643.922	726.097	528.728	567.497	566.402	694.665	647.141	794.873	554.205	585.992	717.334	152.335	653.53	502.884	704.298	375.887	730.826	237.734	805.364	407.756	690.579	672.228	242.235	842.678	607.405	702.657	633.382
ENSMUSG00000005732	3159.19	2580.9	2345.87	726.434	1091.83	1999.45	3370.77	2452.7	2070.67	3009.61	2556.88	3841.82	3672.19	3099.62	3300.68	2613.26	3765.67	671.991	3747.78	2238.35	3658.79	1665.45	2774.34	1084.8	2945.05	1914.07	3123.01	2678.41	998.108	3142.31	3345.97	2877.75	2782.79
ENSMUSG00000005763	57.1564	109.482	164.916	1083.7	1203.99	900.621	138.872	79.4214	878.656	82.6011	237.862	193.632	100.611	85.3637	111.684	192.644	117.791	1140.32	137.406	752.261	121.293	1128.92	80.1228	754.906	58.6446	829.644	139.975	96.6014	1266.2	39.7132	118.191	168.764	178.697
ENSMUSG00000005774	528.935	517.361	493.534	927.84	776.599	856.714	559.067	698.313	1061.61	255.705	603.937	506.805	708.166	547.455	480.803	573.492	433.662	924.842	456.904	803.304	566.989	1031.09	500.972	741.065	502.293	1046.87	425.808	742.776	941.284	573.782	631.647	645.972	600.377
ENSMUSG00000005779	2017.6	1927.72	1721.31	980.248	1862.53	1421.64	1813.23	2147.99	2158.43	3534.85	1893.53	2198.85	2352.92	2067.33	2522.73	1784.07	2229.74	1267.35	2306.11	2510.55	2464.25	1802.98	1864.57	1102.37	2090.77	1612.64	2085.5	1883.63	1209.69	1927.49	2092.78	2330.58	2208.4
ENSMUSG00000005800	12.8196	11.4519	5.04278	9.94273	0	5.92365	7.94056	11.3131	3.87218	5.61739	3.98479	1.99929	4.00131	31.4854	3.0607	7.06509	9.0321	16.1649	8.04045	6.99186	2.99926	9.8864	5.92142	16.8023	62.553	15.7372	3.03288	19.6882	2.98809	19.5748	3.97994	7.53799	4.03958
ENSMUSG00000005802	66.7298	63.6283	86.3127	431.39	397.424	294.2	131.368	101.321	230.236	82.9185	132.839	140.265	152.877	120.432	87.3129	145.635	136.421	493.643	151.023	302.166	131.324	362.046	89.533	310.803	159.51	394.449	87.5249	83.267	405.388	84.7355	135.648	70.784	133.661
ENSMUSG00000005803	84.0947	56.5339	60.3068	221.617	237.722	110.01	101.545	47.1251	184.165	50.21	39.9619	83.2713	67.5592	72.4431	76.463	70.6023	51.5284	365.558	117.95	125.136	59.7593	217.824	66.2661	156.303	51.3403	259.066	40.926	54.8098	165.782	55.6384	82.9846	62.3625	65.7808
ENSMUSG00000005804	365.586	315.223	216.541	369.384	500.649	346.315	392.488	341.633	449.106	281.498	345.355	403.606	338.407	378.557	347.462	242.933	349.148	504.695	376.863	436.199	358.326	556.245	292.598	381.358	452.907	382.279	401.237	287.581	440.81	338.557	395.554	381.919	365.865
ENSMUSG00000005813	931.907	768.344	692.493	512.35	617.181	695.299	833.296	830.068	683.008	563.736	634.062	1109.02	937.288	999.852	666.45	791.469	937.611	732.93	894.757	820.382	1107.11	591.521	763.702	523.403	725.157	810.981	675.783	757.966	696.415	927.571	799.421	831.235	668.924
ENSMUSG00000005823	545.096	457.958	383.858	704.617	749.011	617.08	511.787	481.782	715.953	333.462	482.968	536.494	460.036	559.837	428.052	510.439	500.842	817.068	426.721	627.615	430.863	705.764	499.716	544.682	493.687	771.112	479.94	555.755	681.977	490.048	428.416	619.341	458.089
ENSMUSG00000005824	1.97227	8.58897	10.0855	84.5134	71.6044	56.2747	14.8886	8.48481	49.3706	3.74491	8.96572	6.99766	12.004	7.87135	9.18216	16.1488	9.03208	83.8556	7.03535	65.9232	11.997	97.8753	8.88215	69.186	11.7287	52.1296	6.06578	5.90648	76.6939	5.87247	6.96488	8.48029	16.1583
ENSMUSG00000005836	16.4838	19.404	19.6149	92.2914	67.2122	54.1123	24.5689	20.0021	59.049	9.93187	53.5728	14.1397	15.0335	31.8788	10.823	28.4031	13.3076	100.549	26.6548	66.2249	7.95429	152.364	56.1276	125.154	23.3291	77.3862	23.7675	13.0537	77.4851	20.7656	11.2978	16.6595	15.1772
ENSMUSG00000005846	4166.26	3202.08	2713.38	937.232	1282.39	2210.81	4188.94	3569.55	2447.99	4089.45	3464	5038	5751.3	4406.92	3750.26	3557.16	5349.61	1116.86	4745.84	2526.44	5033.36	2134.88	3291.48	1449.86	4151.49	2629.95	4332.29	3380.24	1217.67	4150.27	4660	3124.02	3415.95
ENSMUSG00000005864	0	0	5.81775	0	0.737786	0	0	0	0	0	0	0	0	0	0	0	0	0	0	0	0	0	0	0	0	5.67367	0	0	0	0.477327	0	0	0
ENSMUSG00000005871	2343.47	2278.71	2022.17	2207.88	1599.09	2213.98	2417.94	2635.88	1363.65	830.532	2429.09	3555.74	3685.07	1806.91	993.945	1880.18	2124.86	1938.85	2028.58	1711.77	3588.82	2017.52	1951.48	1788.74	2359.74	2434.69	1574.02	2186.17	1649.54	2267.68	3400.44	2687.94	1843.03
ENSMUSG00000005873	533.495	596.455	767.509	1361.16	1563.2	1178.81	724.578	597.708	1352.37	823.886	872.662	1029.65	968.326	580.511	985.552	932.592	1001.56	1813.5	1061.34	1412.36	1089.73	1406.83	630.632	1063.49	720.337	1412.42	939.184	571.943	1207.18	526.564	836.782	707.631	1006.87
ENSMUSG00000005881	907.138	744.414	667.685	788.558	1103.77	982.462	835.046	811.268	1025.61	886.536	744.839	776.724	755.828	859.642	741.782	867.196	764.322	966.816	800.398	1105.68	759.721	1202.69	676.914	763.855	829.167	1004.61	713.46	684.021	1017.95	845.19	647.219	854.581	731.994
ENSMUSG00000005882	798.435	588.48	304.077	279.309	363.324	660.49	616.646	799.92	364.601	851.624	653.55	699.845	588.596	687.825	462.783	497.06	640.8	350.26	474.632	449.278	738.415	453.402	500.582	193.096	622.221	661.48	523.591	446.969	429.249	827.754	392.906	923.893	531.657
ENSMUSG00000005883	4.59926	20.4409	15.9464	53.2285	56.7837	33.7671	13.2654	6.55593	54.7758	4.36653	12.3898	6.21647	20.903	3.82412	7.13752	16.4756	6.24073	131.337	2.34374	62.969	6.21707	111.272	3.83573	80.3227	5.31823	26.7596	16.7703	6.12168	105.911	2.2824	8.50771	7.92982	28.7714
ENSMUSG00000005886	1432.84	1736.56	1050.38	1676.44	1489.34	2296.24	1763.14	1435.74	1923.69	775.551	1634.06	1621.75	1497.18	1648.69	665.551	1137.46	1178.46	1627.55	1122.46	1712.28	1494.95	1701.37	1576.21	1267.09	1991.02	1575.28	1033.7	1559.29	2381.14	1671.88	1064.24	1830.52	802.109
ENSMUSG00000005891	0	0	0	0	0	0	0	0	0	0	0	0	0	0	0	0	0	0	0	0	0	0	0	0	0	0	0	0	0	0	0	0	0
ENSMUSG00000005892	0	0	0	0	0	0	0	0	0	0	0	0	0	0	0	0	0	0	0	0	0	0	0	0	0	0	0	0	0	0	0	0	0
ENSMUSG00000005893	2909.03	1722.87	1075.84	2000.45	1744.73	1827.7	1730.95	2292.82	1646.95	1675.11	1953.85	2222.02	2096.17	1954.94	997.588	1461.15	1510.36	1757.22	1371.49	1817.74	1835.82	1604.03	2066.97	1684.92	2599.25	2545.93	1770.03	2354.77	1800.62	2166.82	1628.88	2500.55	1428.93
ENSMUSG00000005897	159.039	126.569	104.602	150.211	155.103	152.808	147.788	108.819	170.779	71.014	143.959	176.873	160.327	192.362	120.639	152.461	163.299	179.871	121.291	156.038	154.257	209.196	136.352	140.049	120.659	191.065	120.219	138.825	161.509	134.817	143.113	144.947	144.734
ENSMUSG00000005899	2158.22	1527.19	1017.22	552.465	322.699	840.474	1173.36	1727.55	1026.55	925.134	1154.55	1355.5	2010.85	2400.77	679.089	1401.42	1331.85	200.629	1710.15	959.272	1584.37	903.686	1215.17	617.496	2035.44	995.957	1579.57	1809.87	628.947	1701.48	1062.01	1678.3	906.638
ENSMUSG00000005907	185.583	231.49	140.874	203.434	316.929	249.762	242.092	274.343	276.338	145.29	202.972	188.791	216.204	213.481	195.126	243.728	158.932	253.136	128.192	335.53	181.698	339.115	145.911	218.975	295.812	214.743	299.588	243.474	232.867	313.972	196.067	178.972	205.085
ENSMUSG00000005917	0	0	0	0	0	0	0	0	0	0	0	0	0	0	0	0	0	0	0	0.99883	0	0	0	0	0	0	0	0	0	0	0	0	0
ENSMUSG00000005936	1855.23	1839.56	1564.04	1047.84	978.043	1684.98	2132.79	2263.54	1517.19	1631.69	1768.64	2069.86	1855.06	2260.17	1540.01	1255.44	1781.56	1162.86	1809.36	1434.75	2154.61	1433.54	1790.91	1507.12	2240.53	1842.61	1634.66	2072.53	1217.54	2016.11	1617.59	2019.16	1366.23
ENSMUSG00000005947	24.7403	50.6594	75.6443	620.403	671.684	398.857	48.5753	35.8517	459.696	31.8559	97.5682	68.911	61.0333	26.5327	42.8177	80.766	53.1225	757.323	41.1557	526.223	49.9706	674.218	44.4355	435.92	18.5875	422.029	69.8507	64.0395	792.602	26.3931	59.7134	44.2601	101.967
ENSMUSG00000005949	168.498	164.719	123.689	434.894	330.716	268.479	192.879	169.809	299.472	125.977	152.203	188.787	162.304	203.5	99.123	209.093	134.567	467.352	155.539	268.905	169.832	313.032	147.713	301.688	224.648	303.873	127.759	161.858	321.596	154.212	157.388	185.81	165.876
ENSMUSG00000005950	4.55757	2.28902	13.9837	36.7618	36.356	36.503	3.66987	3.48568	23.2649	6.05775	3.68323	7.39222	7.88458	4.54734	6.60132	10.2623	2.78288	68.1721	7.43204	22.1583	8.08151	27.4151	14.0765	35.6299	0	31.8204	4.67233	3.63968	37.7565	1.80938	4.59848	5.22572	9.33481
ENSMUSG00000005951	41.4296	53.2701	39.3452	104.43	120.881	78.0178	46.6646	36.7784	100.707	27.1588	39.8593	47.998	47.0297	64.9577	44.9038	47.451	41.0023	129.358	41.2193	87.9236	43.0021	111.749	41.4622	62.2858	35.1964	90.5157	31.349	33.4798	91.5754	40.1403	35.83	43.3564	37.3771
ENSMUSG00000005952	0	0	4.32428	10.4183	7.26522	5.17251	0	1.34737	3.16986	0	1.30479	0.842571	6.87272	0	2.57976	2.88497	1.43427	20.4339	1.43642	4.2094	1.30947	6.98949	2.82098	2.89002	0	18.0087	1.44486	0.829714	2.91241	7.02363	4.26607	1.34666	2.64552
ENSMUSG00000005958	7.19466	12.378	13.899	49.3445	42.509	30.9049	42.9554	8.83863	61.3818	5.64882	33.2793	13.7765	17.0294	12.7618	40.4491	20.4547	14.6438	67.0986	13.8507	48.6868	12.9673	70.6913	13.3898	55.4784	6.33855	82.8169	12.2931	34.3145	45.9664	18.9797	12.6671	29.4767	9.82404
ENSMUSG00000005968	92.5532	105.327	67.3256	108.75	94.818	20.0555	92.3668	199.335	33.0466	199.247	72.8028	78.7496	55.0831	136.168	87.5081	51.9347	76.6644	57.9634	49.7993	48.4974	73.7362	31.765	108.509	102.824	123.088	22.8348	116.866	84.8464	96.5334	146.676	111.009	50.4152	62.7074
ENSMUSG00000005973	377.274	325.599	374.249	455.348	480.301	543.644	431.749	382.432	571.522	225.485	443.685	499.208	491.99	402.988	368.933	374.015	435.093	527.416	449.565	602.789	523.944	607.599	351.677	463.453	353.905	619.055	412.053	369.099	493.18	409.611	450.632	423.252	397.038
ENSMUSG00000005980	0	0	0	0	0.92001	3.85654	5.08276	6.47378	0	0	0.239663	0	0.912555	0.897575	0.930707	0	3.92018	0	0	0	1.27719	0.237839	0	0	1.00101	0	0	3.80938	0	0	0.820457	0.859562	0
ENSMUSG00000005981	3438.81	2790.74	2792.46	1217.87	1904.13	2284.93	2756.84	2965.69	2793.4	2669.37	3294.73	4099.82	3999.23	3169.59	3613.73	3788.58	3872.37	1421.93	3840.73	2841.46	3801.56	2406.82	2824.51	1289.98	3218.84	2705.16	3578.77	2780.64	1540.61	3302.12	3337.3	3178.42	3300.05
ENSMUSG00000005982	1308.25	1104.86	652.908	1489.78	1165.47	1197.89	1509.97	1353.07	1627.16	888.578	1051.08	1289.98	1077.86	1639.98	583.227	1087.61	1102.56	1412.92	948.346	1253.66	1152.74	1534.29	1185.28	1134.03	1131.88	1365.37	897.327	934.204	1385.81	993.862	754.074	1186.12	882.428
ENSMUSG00000005983	42.4191	33.5984	45.4765	56.9194	58.0581	50.6247	41.3235	18.5569	62.3679	36.7514	19.3231	59.6325	47.6018	48.0379	69.3577	51.1178	41.1348	40.186	47.2407	37.7944	40.1998	41.6031	36.9388	29.6627	38.1875	84.6716	46.7708	29.5793	37.047	49.1332	62.6715	62.3478	52.6612
ENSMUSG00000005986	36.1658	63.7964	89.3094	133.977	126.638	120.722	63.716	109.651	125.53	20.4646	136.355	43.0617	69.8406	56.827	110.416	99.4956	39.1345	224.374	41.1052	142.109	109.074	146.299	53.9654	182.358	58.0114	112.537	61.6074	85.4897	203.781	42.7332	71.1086	75.536	95.3046
ENSMUSG00000005994	0	0	0	0	0	0	0	0	0	0	0	0	0	0	0	0	0	2.82066	0	0	0.720978	0	0	0	0	0	0	0	0	0	0	0	0
ENSMUSG00000006005	5505.27	5472.46	5369.41	3801.91	5973.02	5240.6	6944.06	6074.16	6425.61	2667.04	5659.08	8195.37	6961.87	5548.74	6447.38	7623.89	6932.66	5128.81	6243.66	7445.85	6973.7	6149.24	4821.04	3452	4520.88	6707.17	6824.45	4899.32	4022.8	5570.97	5348.54	6565.34	7228.94
ENSMUSG00000006007	0	0	0	0	0	0	0	0	0	0	0	0	0	0	0	0	0	0	0	0	0	0	0	0	0	0	0	0	0	0	0	0	0
ENSMUSG00000006010	386.923	310.938	429.503	407.604	358.165	366.995	437.796	315.378	357.884	320.391	441.351	623.816	642.897	471.223	456.243	467.932	504.345	517.153	463.547	510.543	544.539	402.873	422.859	331.375	440.816	552.99	541.612	393.915	385.379	411.025	560.496	324.448	467.383
ENSMUSG00000006014	49.4353	34.7484	29.4336	18.0704	30.114	26.6882	67.3512	49.9405	36.2703	11.0011	37.3416	26.8489	42.1166	30.987	32.5079	67.5739	27.1003	41.2258	27.7057	48.1255	39.7052	37.4234	33.2793	34.9594	87.9057	32.4424	30.3011	38.3964	29.2126	43.2561	30.8201	45.5462	25.4689
ENSMUSG00000006019	349.456	322.676	345.467	418.716	470.326	428.045	314.008	271.089	493.565	141.865	318.418	363.401	281.816	316.745	326.476	317.04	340.802	436.355	344.774	430.226	346.749	457.043	283.654	362.059	324.196	413.027	307.842	299.632	387.006	300.197	262.755	378.039	317.701
ENSMUSG00000006021	169.943	185.789	156.366	205.954	263.934	198.518	180.392	134.405	293.04	153.779	206.807	155.964	150.953	217.084	163.702	210.198	178.86	217.923	171.174	252.306	135.124	221.021	184.915	119.303	152.507	275.512	182.948	159.423	184.543	212.861	149.987	219.234	177.157
ENSMUSG00000006024	1303.69	1168.21	1027.27	1140.85	975.546	1346.54	1005.3	1107.27	1169.2	963.724	1106.11	1327.62	1180.44	1393.43	1173.69	1072.39	1274.8	1259.07	1327.79	1192.5	1414.06	1276.63	1180.39	1065.34	1304.53	1435.16	1129.68	1229.89	1228.21	1189.32	1232.65	1313.22	1149.84
ENSMUSG00000006050	549.144	506.853	563.357	656.629	786.509	643.466	521.702	612.025	775.71	687.642	676.185	804.898	710.636	573.066	724.861	698.926	741.101	794.707	860.555	729.278	824.363	811.547	509.829	566.48	517.153	704.729	715.836	471.194	682.289	535.214	683.777	599.291	722.546
ENSMUSG00000006056	0	0	0	0	0	0	0	0	0	0	0	0	0	0	0	0	0	0	0	0	0	0	0	0	0	0	0	0	0	0	0	0	0
ENSMUSG00000006057	1523.92	1164.81	1268.6	373.487	678.271	711.946	1174.42	1053.55	908.158	1623.95	1130.96	1426.16	1087.63	1403.37	1747.39	1143.3	1640.02	399.856	1303.72	999.027	1598.22	696.662	1231.42	510.959	1115.88	700.117	1443.92	1158.38	571.874	1418.88	1178.92	1330.84	1285.29
ENSMUSG00000006058	864.147	657.462	733.246	382.937	561.801	593.85	728.989	800.006	764.659	1218.73	674.298	928.477	908.896	863.148	839.316	725.276	971.96	447.416	1026	844.616	979.782	696.359	773.516	449.577	961.617	685.031	805.369	665.381	441.876	837.439	777.427	985.059	826.715
ENSMUSG00000006095	396.159	288.19	304.737	348.63	512.493	358.73	361.478	344.056	423.943	367.244	333.27	396.725	417.98	380.165	431.991	335.75	384.139	427.293	389.241	509.744	444.701	433.336	364.094	264.132	322.902	353.403	358.842	309.8	408.59	327.821	251.198	401.717	403.415
ENSMUSG00000006127	826.606	711.744	641.682	1086.66	1119.27	1053.23	740.223	701.158	1023.77	455.334	686.747	687.54	854.699	661.368	648.793	810.721	748.524	1381.38	852.663	1246.43	858.459	1275.9	779.289	732.873	782.699	1253.8	667.895	645.556	1036.42	625.595	787.759	779.364	728.198
ENSMUSG00000006134	1245.57	1501.94	855.109	905.103	1000.27	1430.95	1081.46	1219.72	1143.5	608.518	1076.39	1235.26	1195.76	1410.93	853.117	867.088	929.166	1199.47	982.66	1685.72	1235.6	1274.77	1164.79	1095.17	1325.38	1165.74	835.128	1229.41	1384.88	1044.69	948.804	1980.96	1116.61
ENSMUSG00000006143	0	0	0	0	0	0	0	0	0	0	0	0	1.13228	0	0	0	0	0	0.619472	0	1.14771	0	1.11707	0	1.10631	0	0	0	0	0	0	0	0
ENSMUSG00000006154	123.072	12.4383	141.368	399.368	656.733	161.224	46.3195	55.2547	249.058	5.19454	59.5669	122.924	182.76	44.9712	130.333	150.675	83.1658	720.019	54.8715	651.538	106.994	455.025	10.2919	405.93	23.4661	460.029	86.2506	52.8356	378.927	6.43744	53.5138	102.796	155.26
ENSMUSG00000006169	1949.28	1716.5	1362.37	1876.76	1673.95	2025	1711.52	1933.67	1816.49	1202.1	1612.63	2117.67	1935.36	2003.44	1327.54	1536.36	1821.23	2146.63	1726.78	2008.83	1935.54	2133.48	1753.36	1584.54	2137.02	2127.24	1629.51	1812.45	1963.35	1825.33	1593.94	1867.65	1633.41
ENSMUSG00000006179	3.02883	2.79889	1.54886	15.7995	22.0919	11.8886	3.63882	2.89561	19.2445	4.90033	3.05971	2.68129	1.53624	0	0	3.1284	2.62636	14.1292	0.484991	5.61045	1.6979	5.53593	1.44721	9.87995	0	17.3875	0.975716	4.53532	38.7519	2.56139	4.063	1.38174	2.96187
ENSMUSG00000006191	234.853	242.854	169.01	147.02	138.133	252.541	302.261	275.21	289.617	306.872	259.595	346.837	321.381	210.675	209.382	208.979	276.644	152.116	281.001	251.697	265.446	289.215	315.07	136.652	306.645	270.98	200.455	272.261	220.936	168.833	247.599	202.975	286.396
ENSMUSG00000006200	0	0	0	0	0	0	0	0	0	0	0	0	0	0	0	0	0	0	0	0	0	0	0	0	0	0	0	0	0	0	0	0	0
ENSMUSG00000006204	0	0	0	1.86604	4.732	0	0	0	0.908457	0	1.86963	0.938208	0.93879	0	0	0	2.70648	1.89618	0.943269	4.68664	0	4.63889	0	0.927572	0	8.307	0	0	1.86941	0	0	0	0
ENSMUSG00000006205	124.117	226.449	257.549	847.448	1062.14	756.858	374.499	226.33	1146.83	206.397	172.587	353.476	285.467	245.09	207.66	439.165	348.395	1424.34	367.323	951.062	281.698	973.364	233.98	805.201	136.488	1084.13	260.124	143.88	813.196	192.833	250.215	339.188	358.252
ENSMUSG00000006215	463.256	330.613	349.981	386.348	403.57	437.964	380.647	462.131	404.518	370.028	440.687	434.219	305.581	566.462	413.487	452.83	480.568	363.838	375.398	493.647	365.16	500.152	389.311	305.216	516.684	364.443	481.774	331.157	332.783	403.032	429.032	483.469	426.333
ENSMUSG00000006216	0	0	0	0	0	0	0	0	0.968077	0	0	0	0	0	0	0	0	0	0	0	0	0	0	0	0	0	0	0	0	0	0	0	0
ENSMUSG00000006218	0	0	0	0	1.00851	0	0	0	0	0	0	0	1.00035	0	0	0	0	0	0	0	0.99975	0.988632	0.986907	0	0	0	0	0	0	0	0	0	1.00988
ENSMUSG00000006219	167.371	199.393	142.967	210.402	118.405	124.857	227.334	75.5222	204.131	156.564	74.9073	109.671	77.3663	105.217	86.1076	187.537	109.29	138.717	316.555	155.807	126.234	175.035	80.1119	291.955	155.241	117.447	76.8392	158.753	124.136	223.4	70.6482	152.793	151.755
ENSMUSG00000006221	5.91674	1.90867	2.01708	5.96563	2.01705	2.96184	0.992592	2.82825	5.80831	1.8725	0.996217	2.99899	2.00069	7.87137	2.04049	6.05576	1.00356	4.04126	5.02529	3.99538	1.99948	4.94316	0	1.97675	4.88694	8.85216	7.07672	7.87528	4.98014	2.93623	0.994995	0.942244	3.02969
ENSMUSG00000006235	17.9879	17.4078	16.4604	65.3179	52.284	32.2263	36.5344	19.912	45.5395	18.452	15.3023	5.75835	4.80187	19.8368	13.7127	18.4105	15.4155	57.2268	20.2629	43.152	5.75889	41.7623	11.0739	35.1088	18.7668	47.2141	11.6469	16.0664	80.3235	15.9739	4.77618	7.79417	9.6955
ENSMUSG00000006241	2.63516	2.31273	5.39021	19.3869	10.8595	4.82103	4.81082	1.40312	9.04677	1.66791	4.16778	5.80043	1.78209	1.19223	1.51846	3.00432	4.46962	6.20326	1.79051	10.5428	1.2114	10.3272	2.63726	5.1788	2.61183	16.8532	1.22498	5.32825	10.4805	2.61543	2.65883	1.14174	1.22369
ENSMUSG00000006262	495.189	379.245	339.844	530.236	437.93	509.46	470.019	363.153	374.544	366.394	510.051	592.514	496.262	541.483	369.35	377.83	590.526	663.991	514.949	455.72	547.388	407.391	408.131	525.087	746.913	589.513	490.875	400.488	507.205	437.778	520.719	287.528	443.887
ENSMUSG00000006269	0	0	0	0.531824	17.9261	0	0	0	0	0	0	0	0	0	0	0	0	0	0	0	1.36416	1.34901	0	0	0	0	0	0	0	0	0	0	0
ENSMUSG00000006270	0	0	0	0	1.0085	0	0	0	0	0	0	0	0	0	0	0	0	0	0	0	0	0	0	0	0	0	0	0	0	0	0	0	0
ENSMUSG00000006273	1262.12	1110.65	1031.91	1490.93	1596.47	1451.04	1402.26	1110.11	1624.82	906.554	1106.82	1485.76	1319.65	1297.35	1122.13	1152.77	1359.22	2153.88	1416.86	1825.54	1332.86	1603.22	1091.72	1558.03	1246.33	1528.57	1134.75	1057.16	1712.33	1184.33	1135.93	1180.28	1134.87
ENSMUSG00000006276	1141.53	1006.32	886.782	1145.9	1302.2	1302.35	1127.14	1013.37	1190.83	533.917	986.326	1243.26	1087.53	1062.08	816.261	1023.34	1023.21	1150.53	1020.23	1119.2	1262.21	1211.9	1011.15	1096.87	868.313	1459.87	1052.52	971.363	1311.71	1140.4	947.218	1088.65	1112.11
ENSMUSG00000006281	1444.52	1225.03	1125.79	653.576	930.711	969.574	1299.95	1224.1	964.336	1673.74	1390.83	1750.86	1940.93	1249.34	1516.1	1519.38	1805.51	874.925	1889.45	1028.66	2004.62	919.87	1396.3	644.942	1259.43	994.727	1624.26	1299.97	760.378	1325.76	1856.65	1294.46	1540.85
ENSMUSG00000006288	589.026	577.338	498.139	801.288	809.765	651.978	559.383	591.686	754.155	742.96	622.985	809.054	647.413	717.551	597.287	656.223	660.591	651.906	780.055	804.374	664.912	619.896	518.004	463.147	718.693	599.172	783.769	657.88	551.325	614.388	557.072	600.916	605.103
ENSMUSG00000006289	553.075	599.384	520.059	430.294	551.913	583.839	589.445	615.127	835.466	902.244	693.588	798.386	866.661	565.958	760.681	624.485	734.489	566.601	833.111	809.581	834.562	663.889	586.896	372.636	557.366	650.012	794.446	668.051	387.371	600.524	779.825	689.73	768.129
ENSMUSG00000006299	1602.36	1278.61	1376.49	1500.36	1686.59	1558.16	1320.55	1620.82	1871.98	1044.28	1678.85	1794.83	1769.83	1479.7	1703.18	1627.25	1641.78	1760.38	1651.2	1859.8	1779.32	1802.76	1429.97	1221.94	1420.59	1750.4	1785.08	1399.29	1571.25	1404.83	1592.59	1558.29	1763.72
ENSMUSG00000006301	498.283	511.436	333.671	524.097	401.475	455.874	545.703	507.327	582.648	501.374	442.803	432.061	344.176	541.19	385.036	438.914	500.046	401.937	500.468	383.759	413.898	535.118	468.669	223.574	490.285	631.27	391.991	401.417	508.741	520.385	429.37	459.341	478.526
ENSMUSG00000006304	4839.12	3524.07	3757.09	4499.92	4658.67	4580.37	5186.07	3870.97	4522.79	3075.21	4494.59	5550.36	5137.62	4889.84	4450.47	4273.96	5167.22	5402.94	4931.72	4811.61	5062.28	5155.18	3461.2	3963.29	5024.72	4951.28	4611.61	3884.69	4699.98	4409.56	4425.65	3469.45	4469.77
ENSMUSG00000006307	2168.25	2025.09	1768.61	2498.33	2356.91	2819.66	2054.13	2578.66	2171.22	605.545	1937.53	2435.13	1802.29	2152.01	981.138	2194.89	1712.38	2657.56	1952.74	2388.79	1929.69	2103.6	2563.94	2373.45	2207.4	3121.9	1525.97	1838.95	2934.23	2572.64	1539.6	2783.61	2059.04
ENSMUSG00000006310	165.313	248.19	161.521	33.2493	65.5618	24.9712	268.706	153.22	50.4495	195.193	176.042	148.725	180.54	178.282	253.022	109.656	169.426	25.4826	228.612	60.1388	339.717	85.3037	280.933	69.4675	155.91	41.614	201.149	181.289	43.7615	143.704	217.582	266.506	201.281
ENSMUSG00000006311	0	0	0	0	0	0	0	0	0	0	0	0	1.00033	0	1.02024	0	0	0	0	0	0	0	0	0	0	0	0	0	0	0	0	0	0
ENSMUSG00000006313	15.778	10.4976	6.05133	5.96566	6.05106	1.97456	7.94058	7.54205	7.7444	5.61739	7.96951	2.999	4.00133	19.6784	12.2429	18.1674	7.02493	2.02062	7.03535	5.99301	10.9973	4.94318	8.88216	0.988381	8.79651	7.86862	9.09868	4.92205	6.97217	4.89371	9.94985	17.9028	9.08905
ENSMUSG00000006315	800.043	710.927	662.209	275.757	537.135	515.374	701.397	735.014	648.694	1308.35	567.742	853.545	712.105	734.733	771.406	682.706	863.434	371.624	806.767	652.646	898.861	541.024	669.255	346.962	760.288	496.309	760.313	667.045	386.721	747.767	655.15	787.374	688.172
ENSMUSG00000006333	25952.8	26573.1	17047	14147.4	21162.2	18634.4	20061.1	31470.5	26407.1	54042.7	22128.3	24810.1	27616.6	25272.1	26475	22999.5	26116.9	17350.5	25960.5	29069.5	24907	24369.5	20476.4	12752.1	23919.3	20183.3	24522.1	21761.4	16342.8	25602.8	23509.7	30703.6	23154.2
ENSMUSG00000006335	210.56	210.119	131.023	135.608	183.08	192.326	145.678	206.358	172.227	250.811	217.119	164.202	198.594	200.7	190.042	185.039	185.52	161.698	157.534	263.227	201.355	225.879	188.997	103.534	194.643	169.745	135.843	224.5	191.086	172.493	201.659	214.009	169.617
ENSMUSG00000006342	108.491	117.289	100.625	360.485	265.889	228.977	219.797	121.344	256.018	50.1089	100.301	148.252	89.233	155.058	77.9207	135.049	128.313	353.248	119.538	262.521	106.712	306.344	96.8384	261.791	145.31	286.528	95.1909	131.284	384.433	123.989	83.8248	129.813	94.6749
ENSMUSG00000006344	53.211	63.2743	55.9784	426.906	419.055	212.511	76.8375	49.5856	340.471	28.7078	50.0888	71.6468	63.5371	58.0079	38.553	82.9264	31.4173	400.785	74.7527	263.122	43.7213	388.342	45.0033	265.62	66.1434	343.635	37.6495	28.8649	378.797	26.9801	39.5611	68.1986	85.3276
ENSMUSG00000006345	6.09779	18.4195	9.9059	58.9073	128.293	57.9113	5.9654	2.33102	67.6185	8.31125	13.3027	9.86805	5.61855	4.05508	12.2143	17.4447	2.57543	71.5471	6.98675	73.1329	18.1944	63.5867	6.85846	69.8106	10.7533	73.1303	13.1598	11.7521	103.12	7.35617	7.71095	5.47788	24.4578
ENSMUSG00000006356	215.4	218.246	245.695	522.095	477.875	434.065	168.309	263.951	445.925	149.737	240.741	266.145	189.079	246.668	223.301	190.909	297.661	524.097	280.833	398.668	242.439	499.48	221.118	456.44	128.495	451.8	128.032	151.553	574.305	200.488	186.972	310.008	204.418
ENSMUSG00000006360	3688.39	2746.79	1709.42	1564.04	2663.51	2235.72	2690.73	2399.38	3545.1	3707.84	1844.35	2212.77	2462.09	2599.53	2148.02	1916.43	2595.42	2040.93	2302.05	4114.22	2348.3	2946.46	1861.13	1845.07	2952.89	2497.37	2133.52	1915.58	2481.41	3235.43	2065.91	1970.79	2041.76
ENSMUSG00000006362	786.505	441.853	407.847	931.94	664.38	923.011	511.928	453.849	526.087	45.2515	660.075	475.374	257.369	669.802	294.568	565.745	328.414	694.2	463.741	676.357	493.922	594.227	581.224	958.928	228.781	688.057	506.742	652.098	1104.19	753.472	261.017	642.945	440.986
ENSMUSG00000006369	36.2537	33.301	57.5478	75.7956	58.9241	77.8286	31.806	33.0579	41.7245	5.16654	22.9579	39.2341	22.55	48.18	22.2319	25.8492	37.6629	75.7466	47.5338	76.7787	21.2427	78.4917	26.5657	57.4343	37.7087	245.446	30.0971	49.0107	63.8746	36.4495	50.4633	52.6137	33.7394
ENSMUSG00000006373	604.497	450.443	447.798	664.176	730.164	585.455	601.499	472.321	606.968	739.625	462.232	698.765	701.236	607.077	564.193	522.816	687.442	830.473	720.622	684.203	620.848	724.673	499.374	513.953	711.54	748.501	565.128	473.502	545.821	591.161	603.956	440.032	586.749
ENSMUSG00000006378	447.689	447.41	557.347	26.3419	43.7418	25.0262	489.995	444.241	34.9376	554.289	589.756	740.77	710.354	411.821	734.863	482.507	819.09	50.0708	584.542	59.8883	842.621	41.3445	528.617	82.3255	360.019	47.1185	677.148	511.431	56.3148	484.232	694.155	551.289	671.635
ENSMUSG00000006386	82.9685	61.7568	85.1971	217.488	168.085	158.23	79.9905	132.238	143.146	19.2597	228.995	109.658	198.564	100.036	106.691	103.816	203.055	440.313	86.4547	326.45	91.72	157.453	201.391	164.757	165.06	241.305	71.5787	73.9083	226.281	65.4194	90.7049	258.004	79.4952
ENSMUSG00000006389	0	0	1.37544	0	0	0	0	0	0	0	0.7347	0	0	0	0	0	0	0	0	0	0	0	0	0	0	0	0	0	0	0	0	0	0
ENSMUSG00000006390	1096.98	999.377	857.233	644.097	785.141	832.671	942.109	1007.61	933.259	584.546	832.398	1143.21	1031.39	1097.08	829.857	895.143	1074.23	795.607	978.915	982.517	1184	797.988	985.697	724.037	933.905	839.155	936.29	926.874	760.259	946.583	898.03	1128.33	859.359
ENSMUSG00000006392	522.771	562.641	598.591	374.045	458.164	581.759	679.88	656.641	623.553	735.679	416.129	611.36	581.575	507.787	544.073	488.279	727.631	512.485	517.985	532.088	647.986	614.735	639.331	394.267	579.327	631.234	630.601	632.062	454.935	571.797	694.167	718.56	457.126
ENSMUSG00000006395	143.497	114.782	77.4349	162.74	225.893	172.802	99.1447	114.92	204.57	106.364	103.856	91.1598	67.6211	149.5	85.8578	121.673	84.9484	184.549	79.4796	174.59	95.0094	178.946	100.291	101.737	113.869	151.797	77.7621	79.6205	161.812	128.476	80.7008	103.466	77.1287
ENSMUSG00000006398	1527.24	1502.28	1524.07	223.758	465.194	836.826	1243.93	1776.75	955.735	1259.79	1623.61	1901.59	2072.72	1687.69	1678.71	1575.05	1893.02	101.796	1912.12	1086.59	1958.7	725.958	1477.87	335.46	1314.68	846.807	1825.69	1639.35	366.627	1673.1	1758.47	1915.82	1665.88
ENSMUSG00000006403	50.1243	53.3021	60.3107	21.8167	20.1173	32.4946	39.5987	104.183	28.9654	25.2119	67.5632	74.7239	63.8536	125.611	72.2703	62.4122	71.0661	34.2355	56.0946	57.8715	69.7992	26.6233	59.0589	43.3743	83.8351	42.1828	76.6315	57.9279	23.8418	67.3561	59.4993	107.057	78.5651
ENSMUSG00000006411	14.9977	8.66937	11.198	31.6066	48.8619	36.3297	33.0615	13.3222	40.6308	19.7172	17.98	14.9131	19.1844	10.9245	22.6554	16.3	9.11668	81.0874	23.1845	39.9781	15.1367	46.794	15.9383	54.0636	23.5924	39.3147	7.14303	3.97448	53.6668	15.8065	17.2607	24.6407	16.3096
ENSMUSG00000006412	796.355	743.518	839.343	326.663	483.967	571.777	684.939	762.434	679.96	808.823	979.788	1145.6	1022.69	725.642	1116.83	950.418	1028.39	453.963	982.86	795.08	942.724	600.587	668.668	403.356	730.852	613.974	1022	650.041	429.981	803.615	1020.47	878.589	932.682
ENSMUSG00000006418	1000.77	991.034	1000.01	1598.97	1628.95	1798.44	1171.17	1183.81	1622.76	888.691	1210.98	1413.39	1255.44	986.717	975.098	1209.84	1112.81	2393.97	1298.87	1929.44	1186.03	1989.54	999.959	1840.7	1465.3	1793.52	1158.18	919.121	1872.71	1020.36	1133.15	1458.34	1329.25
ENSMUSG00000006423	759.723	604.027	592.387	547.889	655.456	766.656	807.326	547.79	795.388	789.775	628.365	1000.61	863.203	889.31	725.408	740.634	753.237	814.055	809.685	876.491	855.794	919.823	618.439	649.328	818.543	978.137	654.278	720.873	664.166	794.473	777.853	713.902	609.097
ENSMUSG00000006435	2.97293	0.959005	2.02705	1.99834	5.06742	2.9764	0.997466	0	1.94568	0.94086	0	0	0	0.988817	1.02527	2.02853	2.01704	4.45552	1.01	2.00756	1.00472	1.987	0.991796	1.9865	2.94661	1.97682	2.0319	1.97849	5.00466	0	0.999861	1.89384	5.07438
ENSMUSG00000006442	3067.61	2547.61	2370.51	406.916	865.87	1448.99	2442.9	2963.71	1979.4	2179.61	2661.1	3571.17	3031.54	3334.32	3159.59	2689.45	3050.5	381.481	3168.69	2197.61	3197.34	1438.92	2842.59	753.068	2705.61	1755.56	2928.61	2724.75	726.377	3089.86	2725.73	3160.68	2797.87
ENSMUSG00000006445	26.6914	36.163	41.8575	91.5006	63.6938	73.0415	22.3882	74.4608	50.996	30.4795	38.1904	49.6059	39.7115	52.2387	36.8197	60.2652	81.4902	88.5617	100.428	91.6111	40.4236	69.5745	82.4851	77.5813	50.2644	141.31	31.0121	23.0923	59.3105	32.6729	38.6013	65.5347	65.2261
ENSMUSG00000006456	1611.73	1709.34	1244.02	566.225	767.81	1180.81	1409.34	1548.35	1092.74	519.716	1440.01	1729.62	1482.91	1534.11	1388.41	1410.6	1434.44	755.029	1393.46	1589.99	1583.53	940.06	1512.46	788.679	985.22	1028	1504.86	1764.89	848.073	1501.2	1443.85	1642.62	1569.96
ENSMUSG00000006457	1.76667	0.854861	3.24268	0.890634	3.24256	1.7687	0.889107	0.844466	3.46856	0	0	1.79092	0.896073	9.70852	1.82775	1.80819	0.898938	2.715	2.70085	3.57889	6.26878	3.54235	1.76807	0.885348	4.37755	5.28626	2.71672	0.881809	19.0637	9.25302	3.56507	0.844015	1.80924
ENSMUSG00000006462	0	0	0.748542	1.03682	2.85187	0	0	2.94933	2.01894	5.85782	0	1.04241	3.12943	1.02601	1.06393	2.105	2.83784	6.32125	4.19223	1.04155	0	2.06191	2.0583	3.82616	1.01922	3.07703	0	2.05309	4.15463	0	0.738495	0.982601	1.05308
ENSMUSG00000006463	218.662	208.55	160.598	193.763	205.62	205.041	247.193	163.62	202.143	93.7731	170.931	205.182	214.834	286.187	184.358	199.354	162.151	194.161	199.352	181.044	196.827	207.759	186.583	154.879	121.671	248.85	182.242	214.707	197.19	171.332	227.621	205.244	209.839
ENSMUSG00000006464	23.5871	21.1678	25.2142	45.3174	52.9434	29.1886	30.4224	16.698	40.7604	11.0982	34.4046	32.0269	28.2571	39.1998	36.2846	52.4656	20.1876	57.8735	24.7848	45.7843	32.9569	51.3855	34.7891	35.425	28.3955	58.4765	24.9523	34.8636	37.9624	30.1414	42.4649	25.2835	27.6616
ENSMUSG00000006469	0	0	0	0	1.00852	0	0	0	0	0	0	0	0	0	0	0	0	0	0	0	0	0	0	0	0	0	0	0	0	0	0	0	0
ENSMUSG00000006471	1151.33	1163.91	875.934	849.329	914.126	1014.77	963.555	1494.56	1095.87	823.622	1033.92	1194.11	1158.58	1258.8	896.878	1230.32	947.48	862.23	918.663	962.305	997.504	1144.41	1112.24	762.13	1289.76	1097.06	1072.69	1044.34	852.736	1145.96	862.969	1115.08	1222.65
ENSMUSG00000006476	126.538	228.628	101.003	306.524	375.235	255.699	176.965	143.237	268.851	105.939	234.865	127.037	180.372	186.352	172.111	143.021	107.836	365.979	227.434	281.151	198.614	308.324	151.552	310.869	154.961	393.712	137.911	147.833	406.45	244.88	167.853	194.878	201.164
ENSMUSG00000006488	0	0	0	0	0	0	0	0	0	0	0	0	0	0	0	0	0	0	0	0	0	0	0	0	0	0	0	0	0	0	0	0	0
ENSMUSG00000006490	0	0	0	0	0	0	0	0	0	0	0	0	0	0	0	0	0	0	0	0	0	0	0	0	0	0	0	0	0	0	0	0	0
ENSMUSG00000006494	2162.03	2241.11	1166.76	1631.68	1781.12	1752.83	1879.24	1739.3	2177.72	2464.52	1359.99	1952.88	2257.41	2424.76	1494.98	1652.25	1839.69	1564.56	2078.81	1750.24	1884.62	2008.76	1363.62	1119.14	2345.85	2039.14	1482.96	1491.27	1464.8	2057.71	2014.77	1760.53	1422.89
ENSMUSG00000006498	10489.6	10197.6	7202.09	3927.35	3718.61	6751.21	9454.09	11813.5	7288.65	6080.43	9292.51	11128.4	11264.8	9948.56	7090.43	7998.78	8891.47	3532.27	8632.12	6928.11	10642.4	6192.59	8785.73	3968.35	10655.5	7241.33	9576.11	9182.57	4479.72	10117.7	10151.7	11131.2	8556.86
ENSMUSG00000006517	187.506	140.088	150.388	159.204	201.855	194.309	136.085	164.164	240.258	133.752	227.303	208.087	242.265	208.748	246.064	161.61	201.869	184.015	215.984	221.619	276.197	216.775	231.816	142.201	123.02	192.688	219.545	189.15	177.427	141.736	239.973	249.551	236.494
ENSMUSG00000006519	1975.78	2075.25	1550.82	1795.98	2334.65	1816.35	1910.61	1821.15	2416.96	3849.92	1745.26	1993.11	2029.59	1813.52	2058.19	1898.53	2221.86	2000.57	2174.87	2638.28	1945.29	2356.79	1727.48	1689.89	1848.54	1995.65	1977.61	1690.33	2137.92	2038.34	1644.91	2143.99	1929.09
ENSMUSG00000006522	11.9145	46.1817	14.7957	85.2406	61.7609	87.3271	41.4286	11.9735	21.9143	22.4949	30.7854	23.1433	15.3936	15.0951	7.62209	17.6013	19.8752	59.8271	21.7183	71.9009	13.4443	57.6942	7.37302	27.9835	22.3399	55.7026	34.6484	17.4729	44.8229	39.7971	19.4468	12.671	18.862
ENSMUSG00000006526	229.425	261.129	149.085	345.764	343.991	263.84	157.721	204.033	346.802	231.281	168.554	173.828	181.074	247.741	136.938	236.584	182.825	382.818	185.406	316.691	152.618	318.76	151.851	277.97	268.897	411.497	137.744	195.948	317.445	181.291	204.118	259.934	206.941
ENSMUSG00000006527	411.113	373.678	267.776	382.792	426.789	494.205	439.188	397.712	459.765	296.525	348.339	458.806	404.694	413.837	281.956	305.465	341.43	511.347	351.529	561.448	426.271	507.509	401.405	472.578	442.264	523.976	291.354	416.012	460.592	450.193	392.497	487.155	315.048
ENSMUSG00000006529	0	0	0	0	1.00854	0.987287	0	0	0	0	0	0	0	0	0	0	1.00359	0	0	0.998872	0	0	0	0	0	0	0	0.984456	0	0	0	0	0
ENSMUSG00000006538	0	0.954353	5.04278	0.994289	0	1.97455	0.992562	0.942763	4.84026	0	2.98854	0	4.00132	1.96781	7.14169	1.00929	0	2.02063	1.00505	1.99768	1.99952	0.988651	0.98689	0.988353	0	0	3.0329	2.95326	1.99203	1.95746	0.994991	3.76903	1.00992
ENSMUSG00000006542	20.338	24.4058	44.2539	1.64047	6.65586	23.5819	25.3839	34.3636	30.0579	37.0705	64.2539	101.428	44.1124	28.4983	71.7082	100.473	53.8412	2.56701	40.3131	19.7761	52.8582	18.4634	27.6814	13.5662	27.3611	17.8511	62.5504	51.9296	4.83947	19.7695	61.9647	41.7241	54.1531
ENSMUSG00000006546	0	0	0	0	0	0	0	0	0	0	0	0	0	0	0	0	0	0	0	0	0	0	0	0	0	0	0	0	0	0	0	0	0
ENSMUSG00000006567	44.1057	48.2508	33.3412	6.76723	4.90299	1.91994	39.5684	45.8325	12.2361	36.4123	50.3673	49.5709	56.4127	34.4401	50.5913	36.3099	53.6674	7.85869	45.9294	8.74055	41.799	8.65142	55.6553	7.68797	45.6155	3.15304	64.8758	49.7717	6.3858	50.4369	59.9806	47.2304	70.6988
ENSMUSG00000006570	0	0	0	0	0	0	0	0	0	0	0	0	0	0	0	0	0	0	0	0	0	0	0	0	0	0	0	0	0	0	0	0	0
ENSMUSG00000006574	76.4096	51.5587	1.35366	0	0.676815	0	51.365	1.89806	0	21.6126	0.668571	26.6124	0.671282	19.8092	25.7606	7.45074	26.9668	0	2.02347	0.670343	26.261	1.99046	0.662301	1.32662	10.4948	0	12.8907	0.660634	0	17.0777	0	1.89706	2.03325
ENSMUSG00000006575	1.20599	6.48697	61.953	65.8032	56.7988	16.6359	29.7662	38.7921	54.1365	9.20893	8.52803	12.1544	66.8585	7.84472	7.91741	11.7195	29.1593	25.4125	11.5941	37.1187	11.2087	56.9875	16.8303	17.1403	44.6893	19.8869	14.2965	7.22333	89.4079	5.42526	12.7643	4.38748	11.7125
ENSMUSG00000006576	14.2732	18.7968	33.2177	85.9987	46.8712	36.3439	14.4601	4.17876	55.896	13.8781	6.85583	19.6898	38.2826	44.6496	13.765	35.0001	10.8539	48.8866	8.22491	95.6849	11.5301	35.186	27.1807	41.2734	10.1251	45.9531	2.75624	5.09982	86.2565	14.6938	14.9464	25.321	11.5612
ENSMUSG00000006585	1315.78	1120.65	967.037	537.464	550.009	889.876	1026.22	1244.55	861.241	964.226	1206.78	1171.6	1179.21	1174.23	1206.77	1124.57	1163.56	580.553	1174.14	1026.65	1316.53	755.133	1223.57	469.301	1507.86	898.615	1318.34	1348.33	600.242	1228.18	1142.27	1309.09	1322.19
ENSMUSG00000006586	4.40993	64.1673	6.44313	108.846	21.5962	61.9568	64.1138	2.40913	27.8353	1.5891	7.00057	9.76991	3.19538	40.9877	5.98447	8.38228	7.05242	79.8845	41.4569	60.7025	4.67649	84.7366	6.96836	85.8357	43.2834	22.3169	5.16679	17.6928	27.0057	5.00217	6.35646	9.20882	41.3628
ENSMUSG00000006587	7.88902	10.4976	16.1369	56.6737	54.4597	35.5419	12.9035	8.48481	42.5943	4.68115	17.9314	5.99796	7.00235	8.85527	6.12144	17.1581	9.03208	50.5154	7.03535	32.9616	5.99855	52.3979	5.92142	43.4884	8.79652	38.3595	10.1096	11.8129	64.7416	7.82995	9.94984	13.1915	7.06927
ENSMUSG00000006589	1464.14	1237.7	1310.29	459.894	784.14	935.096	1286.99	1372.74	1236.35	1979.21	1407.47	1608.67	1598.27	1416.63	1955.05	1446.09	1691.66	425.317	1724.69	1507.59	1753.49	881.578	1298.77	560.687	1389.23	966.464	1596.82	1293.2	596.566	1465.88	1401.34	1503.39	1528.3
ENSMUSG00000006599	1301.57	1005.53	887.484	592.214	721.902	922.432	1356.09	1097.03	803.208	694.505	1023.46	1611.36	1456.81	1240.12	945.552	911.891	1491.9	649.166	1458.18	1042.79	1545.34	811.977	1081.46	654.176	1205.42	1028.59	1124.5	1149.24	579.783	1248.65	1384.72	1041.45	905.499
ENSMUSG00000006611	129.983	134.974	101.858	349.736	270.397	205.683	173.551	186.899	157.499	146.624	30.2005	162.901	118.839	160.239	75.83	117.141	104.59	430.159	131.938	166.4	110.627	301.763	124.183	304.428	173.661	263.938	57.139	65.6875	319.103	102.901	68.5328	78.8971	82.6851
ENSMUSG00000006638	78.6673	30.1786	21.6776	51.0013	74.1617	84.9762	50.4264	60.3786	119.162	47.2849	55.8328	27.1124	52.213	34.1635	44.9303	54.0447	42.0643	55.0393	24.6619	34.7202	54.3838	56.8471	69.688	40.0995	31.8325	84.7158	20.8575	33.2985	65.3631	36.2211	31.8263	42.9715	27.2193
ENSMUSG00000006641	222.849	135.393	192.469	341.68	216.774	238.614	206.57	214.609	174.906	113.616	196.104	319.47	286.265	386.98	146.492	162.745	225.482	373.742	188.294	135.084	374.076	136.121	164.071	134.321	179.691	392.395	151.519	227.514	195.671	352.796	171.036	249.263	170.113
ENSMUSG00000006642	0	0	0	0	0	0.987261	1.98519	0	0	1.87248	0	0.999691	0	0	0	0	0	3.03089	0	0	0	0	0	0	0.977383	0	0	0.984445	0	0	0	0	0
ENSMUSG00000006649	7.83409	7.57363	6.14924	24.8106	46.6669	8.30692	6.4343	8.00334	9.86402	12.6154	15.31	4.36513	0.587518	6.15306	4.00013	2.76789	5.19078	25.7576	8.20598	20.6014	3.99749	31.1142	4.58737	13.5922	7.5968	24.9176	5.72648	10.0011	9.66813	7.05487	9.93494	8.72899	4.83299
ENSMUSG00000006651	4.65762	16.1162	12.9313	38.693	90.6973	13.2119	13.4055	12.4068	21.3371	5.15896	22.1499	7.08233	5.51218	10.0689	11.8106	33.2234	7.89991	25.4497	5.53815	41.8509	9.44392	32.6863	6.21504	29.937	6.92452	16.2594	3.18327	5.42441	49.7931	21.386	7.04917	11.1259	10.3347
ENSMUSG00000006673	1673.53	1636.74	1099.96	1211.92	1394.33	1505.07	1581.26	1525.1	1702.11	1232.46	1267.61	1924.94	1640.5	1647.48	1197.7	1403.73	1661.37	1423.09	1647.34	1485.01	1713.88	1509.49	1418.77	1107.89	1701.82	1602.47	1412.38	1390.42	1436.67	1457.56	1653.86	1497.3	1357.61
ENSMUSG00000006675	18.029	18.9747	17.3545	28.356	32.0449	72.1708	18.1839	11.7959	139.991	22.0242	88.4518	8.70033	9.33451	13.2326	13.511	17.4048	5.03582	25.3484	10.0866	67.9467	20.9945	67.3158	7.20374	20.3715	62.8951	112.021	9.51178	14.2864	28.1726	69.9022	21.4466	9.96503	11.4883
ENSMUSG00000006676	2041.11	2131.5	2105.48	2551.19	2345.91	2576.25	1788.55	2719.92	2458.48	870.592	2574.77	2442.93	2571.2	2415.8	1654.29	2498.06	1804.89	2731.17	1554.2	2389.99	2402.15	2817.16	1868.64	2170.16	1801.88	2382.58	2096.87	2239.09	2082.38	1927.86	2031.76	2529.5	2402.49
ENSMUSG00000006678	1478.1	1215.57	1029.07	249.081	327.443	700.586	1353.97	1161.9	787.072	794.002	1014.9	1739.48	1981.11	1050.48	1459.55	1126.94	1633.61	206.305	1753.93	961.065	1534.29	680.047	1290.99	354.194	1126.58	874.748	1591.09	1500.73	274.333	1502.07	2085.81	908.114	1175.25
ENSMUSG00000006699	5527.63	4253.62	4754.35	5934.58	6395.78	6211.72	6286.98	3946.06	5713.26	3770.02	5012.65	7424.92	7392.32	5000.17	5859.09	5193.88	6949.91	7525.51	6875.18	6804.71	6848.13	6633.52	4652	5598.24	4966.82	6529.18	5779.13	4607.39	6399.24	5124.99	6374.33	4240.4	5386.89
ENSMUSG00000006705	1375.76	1342.45	916.481	619.429	694.66	1443.04	1126.68	1157.08	972.236	538.949	995.815	1401.21	1251.33	1253.02	926.242	1040.58	1287.16	847.143	1174.49	1041.31	1409.61	803.546	1083.42	833.054	1193.07	1088.1	1050.97	1142.35	771.406	1258.65	1261.48	1527.17	1014.92
ENSMUSG00000006711	0	0	8.07718	0.949688	0.9633	0.943017	1.42212	7.55023	0.924619	0	0	0	0	0	0	0	0	17.9033	0	17.2792	0	0.472169	0.471352	0.472045	0	0.469767	8.56436	0	7.97682	0	0.475168	0	8.08793
ENSMUSG00000006715	921.268	1097.31	521.605	100.791	253.112	426.458	863.179	935.53	596.012	2209.22	754.567	986.275	1139.32	861.544	1042.25	755.45	1168.02	125.164	1143.53	676.296	1106.75	425.094	983.446	172.486	1019.55	568.62	1032.41	1029.16	184.259	995.528	948.805	1058.88	844.313
ENSMUSG00000006717	122.671	182.083	509.474	150.179	178.848	111.094	117.197	324.449	461.45	596.128	207.129	263.845	316.06	174.83	267.011	293.335	235.689	263.18	248.045	395.598	234.29	366.499	233.509	49.9022	115.945	601.146	154.083	51.3928	65.683	467.619	263.936	298.94	181.519
ENSMUSG00000006720	8.11525	3.1443	5.18736	11.4657	21.191	12.187	4.90543	5.81875	11.1885	2.88923	3.07426	5.14167	4.11988	6.07278	3.36145	10.3824	5.16173	10.8184	3.31142	7.19235	4.11746	39.155	4.06454	6.10028	2.01086	9.10601	4.15983	3.03794	6.56334	3.74695	3.07054	0.96928	8.3108
ENSMUSG00000006724	4.94006	9.56148	4.04189	0.996191	2.02086	0	2.98336	0.944538	2.90968	0	3.87773	3.00472	3.00675	7.88633	2.04437	3.03368	3.01643	2.02449	5.03486	3.00221	4.00667	2.97158	7.91031	3.96102	3.91703	1.97091	6.07736	4.78981	0.997946	3.92243	2.99065	3.7762	5.0591
ENSMUSG00000006728	4428.76	3831.96	3245.67	1375.56	2018.54	2667.97	3747.6	3709.91	3182.39	5117.34	3456.92	4360.89	4250.7	4124.8	4047.49	3465.25	4391.78	1143.61	4266.31	3313.84	4310.35	2582.18	4036.74	1631.72	3877.17	3004.31	4113.77	3733.28	1676.52	4517.27	3757.27	4639.36	3575.35
ENSMUSG00000006731	2484.2	2594.35	1922.98	4841.3	5575.55	4249.84	3121.46	2356.04	5222.75	1663.1	2350.87	2361.35	1899.27	2609.47	1829.43	2378.61	2129.32	5312	2113.66	4510.36	2138.05	5633.17	2245.81	3855.67	2128.29	4130.32	1865.85	2449.98	5115.03	2135.21	1893.14	2749.23	2225
ENSMUSG00000006732	732.141	672.38	503.079	234.401	285.689	433.207	589.617	648.028	466.467	924.835	563.767	713.928	638.613	762.612	610.535	551.867	712.943	218.277	699.882	485.644	707.564	410.135	650.971	257.883	687.905	535.495	596.096	609.339	276.476	679.707	622.681	772.616	608.589
ENSMUSG00000006736	385.34	285.973	238.524	526.842	590.991	468.041	505.481	448.045	493.51	425.166	224.87	312.523	344.219	504.662	293.052	307.206	325.666	658.7	430.094	461.663	316.955	638.106	353.887	480.99	382.111	458.515	292.485	353.105	532.569	487.382	329.675	517.606	245.401
ENSMUSG00000006740	1930.97	1774.08	1626.68	1698.33	1469.58	2052.51	2144.83	2290.01	1999.57	1129.86	1752.53	3491.28	3337.66	1837.51	1904.68	2115.01	2348.18	2266.62	2519.54	2207.99	3046.84	2157.95	1796.49	1703.84	1970.31	2302.15	2073.66	1637.01	1823.51	1876.24	3061.63	2286.95	2020.72
ENSMUSG00000006763	419.988	401.195	312.427	189.525	264.811	338.99	443.548	411.266	425.225	545.609	392.526	499.112	566.325	468.115	464.272	403.518	548.374	274.225	515.876	436.913	560.151	349.969	348.253	199.86	413.849	362.027	472.393	413.281	210.329	497.064	470.112	480.645	453.637
ENSMUSG00000006764	0	0	0	0	0	0.987274	0	0	0	0	0	0	0	0	0	1.00928	0	0	1.00504	0	0	0	0	0	0	0	0	0	0	0	0	0	0
ENSMUSG00000006777	0	0	0	0	0	0	0	0	0	0	0	0	0	0	0	0	0	1.01031	0	0	5.99855	0	0	0	0	0	0	0	0	0	0	0.942256	0
ENSMUSG00000006782	2088.53	2988.24	1872.75	2250.38	2299.14	3101.44	1843.94	2672.01	3622.28	1893.82	2400.63	2371.14	2801.79	1960.18	2158.2	2416.44	2086.38	2349.1	2454.05	3091.66	2668.57	3266.26	2521.78	1635.1	2451.62	2866.47	2313.24	2369.81	2253.22	2232.15	2252.22	4232.08	2147.26
ENSMUSG00000006784	2.49934	6.09479	4.94069	5.9039	9.23252	4.50784	7.65119	6.60664	7.92164	4.26484	3.29631	2.22222	20.5151	8.01991	9.18259	2.90177	4.36533	30.3506	5.89879	15.1195	5.79844	8.09223	2.83871	6.70098	6.22087	17.6012	3.60616	6.40419	5.00492	0.751868	3.83179	1.36626	5.18814
ENSMUSG00000006800	169.33	166.946	222.525	1160.43	594.119	650.698	340.596	405.038	501.234	66.7684	196.7	323.456	272.071	195.435	124.341	212.713	181.643	1015.46	215.3	634.385	174.931	884.992	384.55	1017.41	123.369	993.7	188.852	140.111	995.234	149.893	136.756	172.761	340.01
ENSMUSG00000006818	1186.51	955.967	787.946	601.555	800.972	661.497	886.256	1175.35	966.437	1021.63	1005.2	1159.9	928.173	1304.39	880.622	689.079	1033.05	1042.86	995.665	1042.74	1003.86	830.255	1204.44	395.608	955.275	894.164	921.291	1149.37	461.609	888.438	791.29	1309.92	986.823
ENSMUSG00000006850	186.378	144.103	243.061	186.924	195.652	198.442	129.034	134.814	255.565	109.539	302.842	309.896	285.096	162.346	306.072	252.325	327.162	207.113	323.627	204.762	334.918	223.433	188.499	157.151	103.603	215.403	346.76	158.49	186.257	116.47	319.39	259.119	301.959
ENSMUSG00000006906	209.439	169.404	170.14	238.869	310.291	278.319	196.888	220.83	284.473	137.19	156.34	244.7	224.801	215.29	174.48	155.309	187.336	340.495	194.254	214.901	220.072	311.616	175.884	228.139	225.628	271.546	213.703	190.134	290.772	198.761	233.181	155.178	156.811
ENSMUSG00000006920	638.715	583.178	609.5	1433.24	973.793	1021.84	609.409	518.1	1108.31	245.524	701.944	616.134	539.921	592.773	504.572	892.569	572.154	1477.96	561.341	1016.93	634.042	1084.43	523.215	963.83	448.514	1179.83	701.489	487.718	1181.04	475.543	529.108	449.327	647.669
ENSMUSG00000006930	57.9869	87.4626	38.161	460.009	323.585	245.112	173.246	94.4247	216.151	30.9884	100.299	35.3545	91.5086	76.1861	20.5158	59.5775	44.5281	427.666	27.3763	193.84	36.1319	285.723	82.4486	257.197	166.676	262.343	33.5532	90.9684	363.181	70.7452	41.449	110.856	50.6226
ENSMUSG00000006931	6.84793	29.673	54.2122	49.2309	94.4058	82.1952	5.90801	38.7418	101.125	48.1945	62.5934	51.6399	29.8762	18.0374	6.41006	84.8081	53.7436	201.749	62.9161	114.965	7.27316	113.61	51.2533	82.1121	39.4853	69.6793	6.68608	17.544	25.3218	82.1896	18.2403	58.6586	41.9275
ENSMUSG00000006932	7174.78	5414.23	5683.95	5001.27	4733	5996.97	6937.59	5901.27	5046.56	3230.51	5918.46	8626.27	7439.45	7161.78	5196.69	6284.24	6774.48	6118.29	6800.92	6242.84	7188.58	5926.25	6481.06	4913.7	6084.58	6973.46	5879.04	5857.04	5371.98	7093.57	6621.92	6350.02	6041.27
ENSMUSG00000006941	672.006	694.346	522.997	466.838	581.272	537.879	715.774	686.614	669.769	1061	528.602	805.063	726.55	817.478	758.017	622.365	782.654	571.087	832.826	755.492	722.381	673.41	611.44	450.331	818.001	610.898	590.52	643.3	482.467	752.69	618.028	904.09	643.805
ENSMUSG00000006948	0	0	0	1.98855	5.04258	0	2.97773	0	0.968064	0.936232	0.996189	0.999654	2.00068	0	1.02023	0	0	0	1.00505	0	0	1.97727	0.986897	0	0	0	0	1.96881	0.996025	0	0	0.942243	1.00991
ENSMUSG00000006958	4.81084	4.02946	3.73853	19.9474	20.0122	11.6929	4.84226	3.11798	10.3898	3.65394	3.15468	3.6859	2.72461	14.3862	1.99089	4.26158	6.28866	21.6867	6.50545	15.5931	3.1324	8.88457	4.16707	9.26722	5.15863	21.7354	0	2.88145	8.74638	3.06659	5.2515	7.8726	5.51618
ENSMUSG00000006998	4005.15	3369.91	2459.53	1997.13	2872.08	3175.36	4073.66	4332.44	3783.9	2839.77	3439.79	4452.06	4479.69	3943.01	3248.03	3234.78	3504.45	2453.34	4233.72	4262.48	3964.11	3431.75	3486.17	1943.48	3346.52	3179.4	3692.85	3401.14	2092.37	3895.54	4325	5180.36	3374.26
ENSMUSG00000007021	0	0.95432	0	0.994281	4.03406	2.96181	0.992579	0	0.968055	0	0.996186	0	0	0.983925	1.02026	1.00929	0	2.0206	3.01515	1.99768	1.99952	1.97729	0	2.96512	0.977407	0.983596	0	2.95324	2.98809	1.95748	0.994995	0	0
ENSMUSG00000007029	6501.38	7276.98	4939.11	3284.71	3896.98	5127.97	6288.3	9534.63	5744.65	4863.46	6725.52	7030.74	7131.86	8303.34	5920.12	6226.47	5730.18	3690.31	5905.02	5494.27	6501.27	4818.7	7573.67	3107.33	8821.13	5447.64	6716.58	7932.23	3259.88	7237.01	6327.03	8527.58	6759.57
ENSMUSG00000007030	5.78538	7.46499	11.8338	22.3604	29.305	21.2376	7.76421	8.29639	26.5033	2.99954	5.3192	16.6299	7.478	7.69654	4.98792	16.777	5.88764	22.7209	7.86182	16.603	4.27063	22.2336	13.5098	23.194	1.04381	20.1963	7.908	12.5131	15.5824	10.4521	5.83729	15.0938	10.7849
ENSMUSG00000007033	0	0	1.05964	2.03294	0	1.05096	0.992548	1.01461	1.02803	1.00145	0	0	0	0	0	0	1.07735	2.07148	2.14975	0	1.01747	0	0	1.0766	1.03223	1.29613	1.01097	1.02788	1.12687	0	0	0	1.02811
ENSMUSG00000007034	10.8509	8.59176	0	0	5.04421	0.987618	9.92898	12.2598	0.96835	5.61926	0	1.99999	1.00065	8.85812	1.02056	1.0096	1.00386	0	0	0.999184	4.00031	0	10.8595	0	10.6746	0.983897	0	15.7557	0.996367	8.81154	0	8.48303	0
ENSMUSG00000007035	38.6703	34.2865	31.7269	99.124	129.255	135.637	58.8877	44.437	92.2573	97.7513	57.4561	36.4621	36.3362	48.0213	130.76	103.122	67.1529	95.9291	80.9301	184.908	35.5106	146.108	96.214	14.4205	108.442	90.7852	25.7859	35.2851	42.0555	86.3511	74.8234	59.451	61.3596
ENSMUSG00000007036	563.102	429.499	433.798	670.197	698.306	663.346	519.92	446.132	776.773	423.793	543.712	521.259	513.105	644.608	558.841	482.839	527.078	695.419	443.636	607.221	434.387	719.773	560.18	510.998	561.09	719.616	543.64	470.253	806.884	507.767	455.413	568.56	575.607
ENSMUSG00000007038	1017.12	1035.9	683.118	741.958	789.682	772.865	652.98	1204.42	859.402	987.286	660.846	747.603	748.319	1054.31	768.097	828.026	947.122	628.07	942.578	882.796	790.528	871.818	644.38	724.881	1088.49	907.45	483.99	783.354	921.112	1013.34	441.753	1016.12	705.632
ENSMUSG00000007039	118.336	68.5733	131.44	135.435	167.467	85.79	49.699	108.445	115.55	98.8138	85.4512	115.166	120.819	151.241	146.87	104.422	130.608	125.126	84.3348	212.214	147.013	156.998	59.4297	71.7419	90.7744	104.518	68.6187	88.9167	141.64	114.288	103.162	101.481	99.9164
ENSMUSG00000007041	2971.5	2796.33	2481.65	2588.04	2809.06	2876.67	3003.48	2898.94	3263.2	4123.89	2945.3	3618.84	3602.36	2712.31	3309.95	2805.2	3630.77	2742.12	3651.3	3186.53	3627.53	3487.67	2601.63	2291.06	3423.88	3040.89	3256.75	2598.9	2648.69	3078.95	3089.76	3338.59	3033.78
ENSMUSG00000007050	855.513	735.201	748.916	216.008	416.248	529.61	798.151	668.394	592.358	733.089	707.238	1034.84	908.022	849.546	881.422	739.803	1094.97	155.699	1098.08	666.964	1011.79	492.577	835.383	317.657	791.312	614.027	951.034	855.956	364.432	838.466	830.737	765.937	780.445
ENSMUSG00000007080	1879.93	1730.42	1392.62	341.39	626.039	920.276	1827.65	1694.58	1201.36	891.62	1750.08	2080.96	2266.52	1809.52	1700.41	1716.17	1992.13	258.629	1941.76	1358.24	2378.46	983.495	1694.55	501.991	1975.97	1073.2	1846.19	1761.52	542.115	1578.64	1815.38	1908.04	1890.62
ENSMUSG00000007097	381.056	383.2	372.37	1095.94	1070.21	530.069	193.924	552.918	790.334	257.719	266.596	271.165	339.152	635.922	256.948	506.512	284.46	2608.97	522.686	803.57	316.145	1031.02	589.009	403.713	210.441	1304.08	227.59	273.801	498.724	173.409	272.879	255.922	572.567
ENSMUSG00000007107	0.998505	1.92819	1.02184	0	0	1.99008	0	0.951852	1.96893	0	0	1.01465	0	0	2.07484	0	1.0036	0	0	1.00636	1.00741	0.994756	0	0	0.988343	0	1.02557	0	0	0	0	0	0
ENSMUSG00000007122	1.29584	0	1.84365	3.97959	8.04932	0	1.20962	3.76225	2.54419	1.2303	1.30905	0	0.609543	0	0.621686	0	7.91253	1.32761	0	1.31254	3.04594	0.602423	1.29687	0	0	1.79799	2.65695	1.19968	1.21383	3.85841	1.30748	4.99841	1.32707
ENSMUSG00000007207	67.603	49.1006	47.3026	116.237	154.679	140.327	66.6083	99.3965	106.27	25.216	54.7424	60.3845	65.4009	71.2871	64.0333	34.248	43.7015	159.939	69.3606	129.764	46.6458	151.203	45.726	103.68	49.0219	131.809	60.0091	90.2472	145.571	70.6106	64.7505	50.4197	66.4461
ENSMUSG00000007209	0	0	0	0	0	0	0	0	0	0	0	0	0	0	0	0	0	0	0	0	0	0	0	0	0	0	0	0	0	0	0	0	0
ENSMUSG00000007216	79.5121	81.9094	92.7088	155.285	97.3583	75.8757	70.6025	85.056	105.578	43.9027	36.8116	111.416	106.506	52.5782	41.8238	82.4613	90.7839	129.855	81.5242	26.1199	126.25	104.638	144.389	41.5702	94.854	71.3518	97.4925	47.4701	81.5103	35.462	71.097	108.967	56.462
ENSMUSG00000007279	2.22084	0.898986	1.1282	8.21046	9.24619	5.162	3.33097	1.05462	2.73572	0	0	1.88338	11.8369	1.8537	2.88323	0	2.2452	0	0	3.35196	1.11838	5.52965	2.2226	3.72422	0	2.9535	1.13093	1.85462	2.22838	0	1.11303	2.12206	0
ENSMUSG00000007338	737.624	671.846	560.756	364.899	485.095	597.302	712.667	739.122	632.137	612.297	647.523	926.688	897.302	798.941	723.35	693.388	843.998	428.371	884.446	738.141	890.782	588.24	681.951	413.139	557.113	620.637	698.575	699.916	385.461	772.228	710.419	881.948	683.699
ENSMUSG00000007379	15.7008	17.7505	8.61819	50.8284	37.6053	41.6566	16.1151	9.87592	27.298	8.00025	27.917	22.2098	14.1934	21.7166	9.70453	8.71346	21.1687	48.6213	14.9311	37.3365	13.403	30.739	10.9632	27.8709	11.092	30.7429	6.04715	6.87482	42.8221	15.4881	6.08011	9.8707	16.2899
ENSMUSG00000007411	1455.2	937.089	767.686	777.973	1097.65	1242.32	1340.55	1068.84	1068.63	663.3	1050.86	1429.1	1567.76	1396.5	858.963	1027.1	992.861	1102.34	1295.26	1178.88	1068.12	1112.79	910.328	864.84	952.008	1198.39	1091.53	1168.71	1018.21	973.898	1168.5	1175.33	1215.83
ENSMUSG00000007415	521.223	413.155	350.798	406.218	357.967	451.791	525.848	461.845	449.691	347.659	451.936	574.708	585.991	473.571	429.766	429.23	506.864	488.128	544.96	500.832	502.58	473.957	464.055	374.513	468.814	557.669	434.082	429.661	374.315	487.875	468.363	443.598	472.036
ENSMUSG00000007440	0	1.47179	0	0	0	0	0	0	0	0	0	0	0	0	0	0	2.1327	0	0	0	0	0	0	0	0	0	0	0	0	0	0	0	0
ENSMUSG00000007457	0	0	0	0	0	0	0	0	0	0	0	0	0	0	0	0	0	0	0	0	0	0	0	0	0	0	0	0	0	0	0	0	0
ENSMUSG00000007458	3186.43	2481.2	2267.64	2967.2	3005.49	3014.75	3298.57	2702.22	3001.97	3036.59	2450.6	3539.93	3339.01	3019.53	2580.93	2638.52	3387.88	3551.63	3227.32	3244.87	3214.8	3336.82	2517.58	2751.07	3041.74	3285.79	2754.03	2543.09	3156.82	2967.86	2811.12	2655.15	2554.79
ENSMUSG00000007476	345.568	361.581	287.464	514.793	488.292	512.33	374.28	362.417	425.116	189.912	328.098	365.153	227.201	383.123	216.125	305.473	307.934	652.726	317.73	555.458	295.844	541.336	406.663	423.474	429.667	400.551	284.901	322.658	517.253	360.227	261.597	434.732	323.823
ENSMUSG00000007480	0	0	0	2.98283	0	0	0	2.82828	1.9361	3.74493	0.996193	0	0	0	0	0	0	5.05153	0	0.998837	0	0	0	0.988375	1.95477	3.93432	0	0.98441	0	0	0	0.942264	1.00989
ENSMUSG00000007564	3340.22	2375.15	2333.99	2155.13	2242.13	2209.58	2379.64	2585.99	2426.62	1636.35	2272.15	3014.23	2527.22	3428.11	2272.01	2367.84	2674.97	2201.46	2664.99	2542.15	2947.19	2419.86	2566.21	1852.78	3399.71	2255.52	2618.42	2336.74	2308.65	3031.18	2246.73	2703.15	2380.08
ENSMUSG00000007570	282.305	209.782	246.422	197.978	175.084	233.348	209.224	352.028	360.233	195.705	270.185	193.534	214.25	262.516	290.075	215.098	154.582	211.113	212.237	292.329	307.811	280.38	233.402	189.141	198.988	232.889	265.598	195.156	235.72	225.019	241.649	306.523	250.108
ENSMUSG00000007589	524.377	611.527	439.544	710.479	678.846	689.593	490.903	616.023	893.285	741.649	479.354	647.712	550.257	591.805	408.728	487.24	704.563	679.03	493.337	606.434	615.32	723.118	551.862	611.22	694.049	805.982	413.665	515.806	769.666	653.871	580.586	819.631	550.622
ENSMUSG00000007591	25.2135	15.247	17.0364	20.331	29.8612	20.8777	24.3259	17.4465	36.1327	8.17646	23.2052	20.5372	9.78282	22.5482	17.2338	25.8724	12.0438	29.9497	24.5365	29.0883	22.3676	40.9049	19.3076	21.0891	12.54	16.0963	17.0771	18.0282	19.7252	19.3448	17.7635	16.659	16.1381
ENSMUSG00000007594	0	0.954333	0	0	0	0	0.992605	0	1.93614	0	0	0	0	0.983953	0	0	0	2.02062	1.00504	0	0	0	0.98692	0.98837	0.977412	0.983591	1.01092	0	0	0.978778	0	0.942261	1.00988
ENSMUSG00000007603	1077.34	993.288	966.118	759.292	975.23	900.948	783.274	1109.76	967.688	933.774	977.87	1009.16	887.716	1070.43	1042.66	1029.52	910.166	710.566	972.311	927.048	957.073	953.321	880.487	637.158	1091.91	867.064	995.737	972.731	834.17	999.507	915.236	991.715	1070.45
ENSMUSG00000007610	404.05	392.933	222.997	272.744	368.199	362.303	310.389	413.406	401.899	351.255	283.864	311.517	312.405	420.214	320.537	273.437	326.199	218.439	340.796	378.353	372.316	367.334	367.71	201.074	261.383	321.045	296.995	398.938	271.281	415.523	290.494	464.869	340.168
ENSMUSG00000007613	623.126	448.576	398.537	1002.4	775.332	804.419	754.711	529.922	648.103	390.939	494.988	675.892	564.28	613.768	365.727	486.473	579.577	1057.86	540.519	763.407	595.418	896.768	500.598	738.681	676.239	934.608	456.464	552.148	1045.96	662.472	568.08	525.749	477.705
ENSMUSG00000007617	229.364	301.199	169.6	156.519	111.378	236.411	299.381	291.856	234.11	189.486	173.422	351.861	301.266	364.422	169.613	244.15	282.317	123.908	252.01	219.19	349.745	189.736	235.313	163.465	271.222	229.072	210.717	233.102	193.045	263.398	218.639	331.31	222.588
ENSMUSG00000007646	79.6322	45.9805	38.6832	35.1147	45.2607	66.0441	87.5405	27.5196	47.1733	31.84	79.9989	80.6168	73.5571	72.3347	69.3109	56.7777	47.9289	44.8855	61.9449	51.1637	60.4474	63.8062	86.01	24.9163	35.5093	56.7861	73.0959	80.1424	44.7773	56.002	69.4118	60.9796	69.5388
ENSMUSG00000007653	0	0	0	0	0	0	0	0	0	0	0	0	0	0	0.604469	0	0	0	0	0	0	0	0	0	0	0	0	0	1.71085	0	0	0	0
ENSMUSG00000007655	625.935	736.322	579.627	2068.74	2105.28	1206.99	625.509	818.995	1415.19	650.852	656.083	911.189	922.588	887.51	590.623	1027.2	776.623	3097.56	999.988	1049.14	847.448	1959.51	773.389	933.49	661.464	2743.39	764.207	655.439	1109.28	669.164	760.694	713.796	872.619
ENSMUSG00000007656	1157.01	931.133	904.002	702.904	965.806	946.608	1044.7	853.218	1060.87	1455.29	816.603	1313.18	1228.83	1121.25	1195.82	993.605	1292.33	782.835	1224.88	1040.52	1337.31	1031.88	1042.29	657.685	1267.83	865.654	1161.89	886.42	739.046	1207.01	1145.04	1059.47	1037.28
ENSMUSG00000007659	164.104	192.695	176.71	331.252	442.089	380.424	239.213	203.377	304.084	255.603	214.903	300.007	201.15	265.143	210.465	153.916	255.615	370.774	256.124	322.259	212.141	378.487	169.482	410.846	244.381	424.875	206.639	203.014	484.176	255.195	252.729	186.991	273.199
ENSMUSG00000007670	3562.93	3740.21	2827.48	1889.02	1886.18	2578.78	2889.18	3139.73	2494.83	1682.76	3212.98	3765.08	2753.6	3432.65	2989	3182.1	3157.9	1766.2	2960.32	2631.83	3481.14	2316.08	3504.65	1940.52	3296.23	2062.69	3316.89	3388.84	2070.9	3196.42	2981.32	3665.68	3151.59
ENSMUSG00000007682	0	0	3.02564	6.95995	7.05953	3.9491	1.98518	0	1.93618	0.936208	1.99236	0.99963	3.00102	0.983909	3.0608	4.03726	2.00707	11.1134	2.01019	2.99649	2.99918	8.89776	0	0.988408	1.95472	11.8029	3.0329	1.96889	3.98416	0	2.98503	1.88447	2.01982
ENSMUSG00000007721	654.985	502.948	587.187	307.356	402.278	463.98	490.652	440.962	532.865	489.304	567.269	680.736	480.699	568.199	635.936	509.852	674.353	295.473	616.612	578.981	641.486	462.065	489.794	331.409	597.678	417.126	577.391	485.648	373.682	570.931	525.156	602.35	594.236
ENSMUSG00000007739	4944.28	4328.01	3716.67	2283.47	2957.33	3382.11	4844.98	4860.49	4261.22	7301.27	4547.2	5963.79	5767.59	4828.91	5096.12	4136.89	5896.31	2896.22	5567.49	4273.68	5954.45	3709.59	4754.88	2656.96	4317.68	3568.43	4669.18	4858.22	2688.48	4970.18	5069.3	5505.97	4520.04
ENSMUSG00000007777	121.591	103.32	95.0366	84.2909	108.176	86.1037	117.411	75.3473	91.22	113.399	105.855	131.052	153.224	128.958	101.855	106.236	134.541	91.1508	123.925	120.206	139.431	93.1601	89.0394	73.3189	70.1627	106.487	114.519	101.29	79.8774	111.987	112.709	108.355	113.386
ENSMUSG00000007783	15.6971	34.8949	16.3112	117.603	52.9526	74.0713	26.2514	16.459	71.322	7.96972	11.7821	12.6613	13.3529	36.7597	10.8406	36.9011	25.2729	103.739	14.4077	73.0935	13.3057	78.1611	40.6943	57.8143	35.146	46.4517	23.7441	11.725	88.7608	38.6208	15.6351	40.2172	18.6226
ENSMUSG00000007805	4.00656	0.969341	2.04883	11.1091	12.2925	8.02244	4.03274	5.11652	14.1848	0.950951	4.04745	2.03077	9.14466	4.99698	5.18144	7.17622	5.09675	15.393	8.1669	10.1455	6.0929	18.0755	9.02187	13.0509	4.96381	15.9848	1.51414	1.9998	14.1637	3.97657	2.02126	2.87123	5.12891
ENSMUSG00000007812	586.811	546.473	336.329	589.721	556.36	532.889	627.134	537.904	572.54	709.239	407.963	630.476	593.986	655.098	409.227	497.443	607.704	718.987	582.257	693.52	661.469	653.064	519.657	509.44	657.777	685.809	452.092	521.507	549.535	617.425	481.02	671.221	429.323
ENSMUSG00000007815	5036.19	5504.45	3470.18	4687.5	5090.13	5453.03	5396.01	5709.71	6082.55	5292.4	4326.99	5815.78	5530.84	5056.64	4248.04	4358.94	6055.38	5392.3	5651.48	6248.64	5705.26	6173.36	5005.57	4163.69	5007.89	6081.84	5030.61	4888.92	4496.56	5481.51	4612.8	6296.77	4440.53
ENSMUSG00000007817	3199.9	2655.19	1574.6	2506.36	1602.47	3404.6	3542.91	2071.3	1876.96	751.257	1718.55	2277.37	1371.86	2996.49	870.202	2087.91	1901.96	1768.77	1847.14	2406.69	1670.4	2548.86	2399.99	1917.15	2723.43	2612.28	1897.47	2865.86	2026.51	2628.93	1391.73	2125.91	1319.97
ENSMUSG00000007827	407.744	680.724	435.96	255.686	353.968	213.777	659.003	687.253	398.87	214.826	386.68	458.018	309.199	583.022	326.497	488.747	467.918	395.065	399.74	360.671	607.602	415.233	523.58	145.943	499.175	452.741	443.232	565.172	333.705	708.846	476.793	521.351	398.537
ENSMUSG00000007833	1031.82	880.547	810.372	684.102	797.405	859.232	699.983	1183.82	773.382	983.392	794.621	953.674	1090.38	1407.48	880.916	937.263	1041.25	542.199	867.154	827.921	854.453	594.332	1064.4	741.278	868.839	652.921	1491.18	929.443	896.856	991.637	892.193	1049.02	756.918
ENSMUSG00000007836	3395.24	2698.84	2538.53	1533.17	2234.87	2109.81	3258.61	2424.77	3144.23	2137.42	3189.8	3820.71	3407.15	3652.3	3265.79	3161.12	3557.64	1593.26	3200.09	3267.2	3356.18	2818.61	2926.17	1506.28	3643.71	2030.1	3140.05	3213.12	1650.41	3004.74	2968.04	2675.05	3103.41
ENSMUSG00000007837	36.2646	19.0658	75.7101	131.984	104.473	61.6382	34.1746	34.7775	118.134	28.6525	35.626	33.5221	22.2377	38.31	33.1167	57.8716	31.786	89.67	35.4378	82.2614	27.4265	93.9505	41.3704	68.498	38.2811	128.701	23.6195	20.1053	77.6144	29.1012	23.9966	40.3197	37.1478
ENSMUSG00000007850	8167.23	7467.27	6766.69	5595.22	6351.17	6730.18	7275.91	7713.37	6258.97	4892.26	9297.76	9363.48	10472.4	8799.66	8354.91	8141.95	8875.83	5832.66	9713.29	6271.1	10041.6	7027.34	7471.17	4851.58	7158.03	7948.29	7798.62	7920.31	5004.35	9164.82	8284.1	7061.13	8181.35
ENSMUSG00000007867	28.4049	16.67	31.8949	32.9074	58.276	27.2298	13.6027	21.6683	36.5394	25.8091	14.6537	22.2038	13.795	18.996	9.37965	17.6302	17.5974	95.0302	18.48	61.903	13.1134	45.3589	18.1464	52.5328	13.4786	44.7836	8.36492	12.6704	37.5438	11.6976	9.14746	17.3253	22.2829
ENSMUSG00000007872	775.928	664.299	517.098	724.794	1136.45	825.8	650.022	713.632	1171.25	1070.19	524.436	676.69	718.771	861.832	638.873	832.297	731.654	660.342	840.528	932.635	751.986	945.368	672.93	537.882	491.092	948.811	804.784	716.564	816.336	627.815	588.449	852.435	611.137
ENSMUSG00000007877	0.986122	0	1.00855	0.994278	0	2.96182	0.99258	0	2.90416	0	1.99238	0.999668	0	0.983907	1.02025	3.0279	0	2.02061	1.00504	1.99766	5.99853	1.97727	0.986899	2.96512	0.977384	0	1.01095	1.96881	0	0	0.994985	0	0
ENSMUSG00000007880	5142.08	4733.38	3584.27	5361.76	4707.24	5866.88	4806.93	4233.79	5227.11	1319.93	4258.71	5062.31	4210.56	4761.44	2534.23	4123.74	3935.86	6094.8	3410.31	5123.72	4392.26	5239.58	4422.14	4532.37	4551.44	5364.41	3766.71	4646.34	5839.89	4253.93	4147.77	5056	4072.76
ENSMUSG00000007888	0.50834	0	4.99925	0	11.6002	0.508939	2.41957	1.45796	16.6914	2.28225	5.26403	4.87374	1.03134	1.52161	0.525927	7.71981	4.89274	7.53523	15.6274	0.514886	5.20972	0	10.2855	0	2.01535	2.02811	5.13939	0.507469	1.54033	4.85147	5.18485	0.971448	2.4618
ENSMUSG00000007891	5374.84	3477.85	4035.2	5484.42	5738.12	4668.12	6240.14	4578.6	6108.58	5026.45	3425.96	5831.94	4193.29	5104.99	3583.05	4265.67	6176.05	8287.91	5769.93	6463.88	4228.06	6149.05	3105.6	5413.51	4976.04	6763.83	3828.54	3616.92	6189.7	5818.5	3746.25	4376.29	3525.83
ENSMUSG00000007892	26469.1	21805.7	19564.5	13580.2	19566.2	18097.6	18288.3	21016.6	21098.2	36335	20452.1	21540.6	20900.4	25404.6	25093.4	21794.9	24223.5	15466.1	23880.8	23146.3	22833.1	20173.8	19481.9	12843.1	24221.1	16190.5	22149.5	19864.1	17330.5	24538	20001.8	23672	21903.8
ENSMUSG00000007907	0	0	0	0	0	0	0	0	0	0	0	0	0	0	0	0	0	0	0	0	0	0	0	0	0	0	0	0	0	0	0	0	0
ENSMUSG00000007908	280.43	238.763	141.077	9.30273	28.6214	79.6076	125.722	212.659	83.8813	166.322	250.164	232.068	282.004	203.065	184.013	200.439	137.504	8.7784	234.362	137.848	195.699	57.0179	177.614	21.7998	236.363	71.9473	192.909	199.257	29.4911	184.995	205.21	294.957	174.938
ENSMUSG00000007944	0	0	0	0	0	0.987257	0	0	0	0	0	0	0	0	0	0	0	0	0	0	0	0	0	0	0	0	0	0	0	0	0	0	0
ENSMUSG00000007946	0	0.861453	3.39224	0	0	0	0	0	0	0.845128	0	0	0	0	0.920974	0	0	0	0	0.901634	0.90249	0	0	0.892186	0	0	0	0.88862	0	0	0.898182	1.70112	1.82324
ENSMUSG00000007950	203.273	215.694	167.791	601.275	569.473	476.924	192.821	165.624	439.441	95.5529	231.789	184.798	159.762	217.492	191.737	242.992	220.997	553.373	193.713	485.746	206.138	614.601	224.54	440.801	137.249	455.579	187.785	218.491	608.423	171.692	146.046	280.005	213.663
ENSMUSG00000007987	564.102	492.735	372.692	119.384	166.319	282.292	550.934	426.463	343.929	542.287	540.87	574.397	656.656	555.579	548.647	448.565	659.367	102.1	624.888	405.217	662.945	269.116	467.366	178.171	466.481	325.296	609.849	563.969	167.569	654.193	571.573	628.773	602.47
ENSMUSG00000007989	3.75641	0	52.6671	102.158	6.14652	7.52133	7.56171	1.43653	102.365	50.1459	5.31252	44.8135	6.85874	5.99666	0.777223	0	5.3519	20.7814	3.82849	10.6532	1.52338	9.79122	3.75922	8.28269	3.72289	18.7328	0.770226	0.749835	6.07029	52.4226	0	2.15351	52.7372
ENSMUSG00000008028	10.8221	1.76545	0	3.81667	1.8657	0	5.64636	4.36013	0.895421	7.31433	6.2275	2.85584	2.77586	13.1633	3.77931	4.66788	4.64136	0.93451	5.37707	1.84781	1.33643	0	6.6977	0.914222	0.904061	2.96188	2.88689	3.94895	1.8426	3.32116	3.68134	14.3504	1.86826
ENSMUSG00000008035	608.848	528.344	529.078	431.217	333.688	381.649	373.202	566.232	434.798	372.955	585.459	646.165	562.21	558.972	456.825	398.826	651.943	324.758	625.212	369.753	704.768	407.519	629.282	357.959	416.277	438.198	614.127	525.369	355.353	498.663	604.07	664.973	546.056
ENSMUSG00000008036	1046.06	972.32	895.175	717.479	805.783	887.516	1003.28	1033.73	1092.63	980.248	866.694	1277.21	1365.47	968.609	1159.84	981.047	1333.06	875.225	1283.58	1215.11	1399.67	1064.52	906.192	626.135	1052.03	1036.61	1137.85	998.724	842.825	1089.77	1033.87	1239.17	1057.07
ENSMUSG00000008090	57.6509	52.9262	66.5771	238.173	192.975	113.898	61.7378	87.5318	161.632	76.0644	82.527	86.9076	39.2662	76.4812	83.9403	85.2411	60.9029	367.963	75.6249	154.861	55.9704	219.853	64.3684	107.236	72.0279	257.27	33.9526	63.3056	86.5462	60.4888	55.6758	74.814	92.4057
ENSMUSG00000008129	10.5484	10.0194	11.4033	34.5214	27.6522	74.9305	12.8258	10.6593	30.2023	10.5856	64.615	68.1404	12.4839	9.44219	53.198	42.5919	38.4087	16.3187	15.4221	22.5868	12.129	28.2009	7.97037	64.4136	13.419	34.1569	13.5176	11.9253	27.7931	6.97965	10.3196	10.9191	13.0496
ENSMUSG00000008136	28.0863	27.091	68.4445	18.8774	51.7147	56.5639	10.4694	44.863	45.7626	9.87523	5.60406	25.7246	28.7174	13.1457	28.1754	36.7018	17.6423	27.707	14.8415	65.7368	9.92724	18.8178	1.38797	14.5952	19.7471	39.6737	6.39806	37.8683	46.914	13.0765	6.29694	11.5337	15.2561
ENSMUSG00000008140	1123.82	1033.18	678.478	1001.44	1271.9	1110.16	962.368	923.696	1473.94	934.664	996.484	996.616	825.144	1187.96	928.291	975.092	912.98	983.811	991.836	1287.75	1008.12	1187.06	960.43	881.117	968.562	1066.21	924.408	963.956	1042.18	1051.89	806.492	1142.91	986.846
ENSMUSG00000008153	0.33939	12.0029	22.5685	41.9509	66.1371	21.9711	7.40351	4.70302	28.936	4.64702	7.18029	7.72934	4.54192	10.0821	25.2078	10.0772	2.2865	91.5863	1.03773	27.1872	8.0564	24.0111	9.61341	4.08202	0.67277	44.2544	1.04381	10.0872	12.3904	7.28703	2.4693	14.0321	10.0146
ENSMUSG00000008167	117.673	47.7402	55.7925	109.531	115.81	150.451	85.631	59.8786	80.039	114.368	58.8038	41.157	93.3699	67.2216	66.9627	77.2859	89.1789	99.9764	104.947	73.7203	73.0513	77.9829	99.2254	115.29	58.7567	64.4428	62.188	96.4701	87.9384	55.0306	107.505	70.034	68.1514
ENSMUSG00000008193	3337.07	3801.13	2864.17	4192.84	3343.1	4406.03	2625.12	3073.54	4156.74	1693.98	3501.37	3828.06	3086.28	2894.43	2617.91	3414.85	3296.76	4097.73	3023.64	4450.1	3467.86	4154.83	3221.16	3615.61	3279.1	4186.71	3125.99	3498.9	3327.61	2840.35	2918.04	4695.66	3223.91
ENSMUSG00000008200	2937.63	2737.82	2085.2	2680.93	2475.93	2881.56	2717.94	3433.56	2753.37	2082.39	2320.69	2860.1	2719.52	3400.41	1836	2833.22	2308.1	2639.49	2149.58	2876.44	2796.61	2684.84	2622.13	2054.13	4586.48	3106.47	1982.52	2697.62	2520.79	3328.05	2604.52	2612.45	2465.98
ENSMUSG00000008206	322.085	402.259	250.153	676.773	659.536	615.141	388.798	466.265	729.286	468.448	285.215	394.908	355.252	400.324	363.904	386.499	372.829	669.103	377.326	457.678	339.911	673.992	381.9	443.986	439.672	554.315	387.262	352.523	723.438	395.052	304.987	560.26	436.803
ENSMUSG00000008226	388.972	290.291	216.517	141.577	177.282	193.148	360.111	256.653	250.635	236.58	348.471	371.804	476.948	265.613	318.325	230.767	363.667	176.898	327.859	166.442	373.752	174.333	332.737	148.078	227.71	292.741	310.47	208.202	112.22	305.224	339.457	304.025	242.075
ENSMUSG00000008301	459.898	415.55	477.143	336.506	383.454	455.54	493.757	502.54	514.46	303.599	642.863	860.927	810.582	445.476	625.012	523.313	808.416	449.753	808.518	518.184	841.171	462.599	428.644	359.995	434.986	441.978	684.141	447.868	354.371	430.901	625.58	504.29	640.821
ENSMUSG00000008305	308.033	182.803	244.537	160.152	172.612	314.886	255.94	223.052	214.706	170.018	302.978	416.441	309.786	246.012	215.707	321.516	415.366	196.843	261.181	206.447	444.241	299.648	122.268	253.656	244.69	264.115	321.366	236.45	173.631	221.931	330.217	169.583	298.124
ENSMUSG00000008307	11.8403	8.48944	90.9365	97.327	108.147	13.7301	87.5203	31.3471	14.1961	134.918	116.522	97.9298	47.7544	42.6165	60.0263	89.2102	30.1954	98.9957	40.9482	116.564	50.9697	217.951	107.902	12.1859	191.262	41.1105	78.9659	59.4949	60.7253	96.3213	92.2035	7.22378	94.645
ENSMUSG00000008318	373.655	287.242	251.741	382.875	431.963	497.199	311.83	446.639	464.228	366.605	280.086	412.244	324.81	486.695	322.395	368.663	273.982	632.867	267.255	510.564	372.907	439.382	325.707	575.807	435.411	521.245	278.761	326.562	604.319	552.426	270.101	405.427	397.166
ENSMUSG00000008333	1071.25	581.914	732.206	507.067	675.979	807.854	1126.75	637.811	535.271	597.388	1003.42	1285.82	1555.02	1160.16	1130.56	871.763	1360.97	606.916	1330.57	986.215	1304.2	846.7	823.175	525.616	968.281	1011.86	1106.09	954.243	610.716	1047.54	1414.87	496.575	996.884
ENSMUSG00000008348	6840.57	6235.82	5883.37	8582.65	9436.88	8132.68	6922.14	8182.06	10286.3	5324.56	5816.02	7472.79	6743.61	6971.71	5550.58	5902.7	6372.23	10791.6	5974.58	9856.63	6445.58	10369.6	6694.6	7037.36	8114.7	9508.28	6261.8	6512.71	8523.93	5870.03	6680	8819.53	6308.57
ENSMUSG00000008373	1662.07	1427.57	1256.87	625.883	846.193	1199.45	1496.49	1538.71	1282.71	1353.88	1301.61	1716.25	1675.29	1716.35	1457.99	1412.27	1630	664.2	1597.63	1338.82	1687.25	1113.55	1464.39	735.721	1470.1	1240.96	1478.33	1497.78	731.232	1677.04	1520.63	1718.96	1327.46
ENSMUSG00000008384	105.608	117.349	138.87	236.26	261.335	195.414	100.604	156.371	199.557	191.961	149.551	173.658	109.043	147.653	150.235	131.252	157.51	308.171	157.608	310.402	135.747	283.6	153.684	238.74	111.215	181.612	98.6012	116.72	295.346	81.4207	101.8	149.562	127.467
ENSMUSG00000008393	406.207	514.382	299.54	508.251	581.912	522.269	388.096	494.948	492.92	394.233	322.765	416.86	385.13	493.729	321.376	361.329	430.529	770.4	503.531	631.265	403.901	559.493	521.009	453.663	585.388	705.224	342.716	442.985	448.211	494.728	365.159	729.303	310.842
ENSMUSG00000008398	707.817	725.16	444.386	1062.29	1042.42	1074.17	807.239	657.996	1046.52	431.379	611.37	636.083	763.1	812.681	511.908	608.44	664.725	1096.32	590.212	904.664	629.35	1214.33	665.98	970.732	864.831	1148.38	495.145	578.221	1129.9	646.51	539.639	810.148	573.455
ENSMUSG00000008429	404.263	327.378	330.188	660.132	566.489	597.268	404.744	348.65	554.227	297.211	425.313	494.108	476.126	467.803	351.417	405.175	432.946	849.077	436.49	596.587	462.103	611.779	369.425	504.355	525.589	667.406	411.091	424.665	594.595	400.039	417.837	358.328	435.623
ENSMUSG00000008435	438.178	354.987	293.809	157.024	169.889	165.36	342.871	512.393	335.151	509.744	290.115	422.684	259.455	359.605	310.534	273.233	382.442	182.697	332.802	379.795	255.964	253.068	256.751	216.434	411.92	278.556	301.529	373.105	177.484	225.613	290.577	289.696	341.766
ENSMUSG00000008438	0.986107	0	0	0	2.01705	1.97452	0	0	1.93613	0.936198	1.99239	0.9997	2.00071	1.9678	2.04048	2.01862	0	0	0	0.998811	0.999727	0.988633	0.986898	0	2.93218	0	0	0.984432	0	0.978758	0.995002	0	1.00992
ENSMUSG00000008450	236.235	174.423	308.88	74.5533	103.741	229.6	209.391	165.12	106.321	203.386	164.276	331.83	267.01	250.55	328.132	201.695	333.68	107.641	246.695	245.681	246.328	170.286	207.317	110.045	271.707	136.705	180.023	151.895	167.843	245.617	270.01	215.094	285.579
ENSMUSG00000008461	0	0.732824	0	0.763497	0	0.758104	2.28651	1.94635	1.48667	0	0	0	0	0	0	0.775015	0	1.55161	0	0.766971	2.06398	4.55494	0	4.08098	0	2.26578	2.08711	2.03233	0.764834	0	0	0	0
ENSMUSG00000008475	3692.01	2604.38	2776.22	3532.72	3788.92	3482.09	4089.94	2700.67	3198.21	4044.56	3117.35	4034.03	3974.99	3568.87	3742.09	3183.62	3987.04	4529.43	3732.24	3804.23	3693.78	3946.2	2751.48	3168.69	3701.08	3605.03	3319.43	2842.8	3840.11	3285.48	3354.56	2698.84	3493.05
ENSMUSG00000008482	0	1.47361	2.257	0	0	0.736461	3.70207	0	0	0	6.15301	1.54361	3.08932	0.733958	1.5221	3.76444	1.54963	0	0	1.49017	1.54375	0	1.52393	1.52618	1.45818	0	1.50826	1.46864	3.07599	2.19029	3.07279	4.40484	2.25999
ENSMUSG00000008489	0	0	0	1.18672	0.601876	0	1.96221	0	0	0	0	0	0	0	0	0	0.598866	0.602925	0	0	0	0	0	0	0	0	0.603328	0	11.557	0	0	0	0
ENSMUSG00000008496	1709.34	1790.94	1321.66	1685.91	1564.11	1872.24	1579.45	1294.52	1824.93	610.894	1442.04	1433.38	1272.79	2091.13	997.707	1331.84	1103.24	1480.11	1217.55	1466.72	1501.13	1856.16	1672.65	1323.18	1830.36	1764.57	1275.7	1764.36	1636.73	1909.78	1260.82	1986.72	1431.56
ENSMUSG00000008540	354.962	282.472	374.153	696.389	905.304	426.39	256.164	274.056	605.906	477.219	316.483	368.254	481.929	318.038	557.86	420.17	368.408	1692.42	532.229	520.056	427.374	651.74	381.022	390.254	316.108	1009.92	347.381	255.714	358.537	285.063	412.158	288.803	470.524
ENSMUSG00000008575	136.09	180.7	158.296	695.294	540.351	846.071	303.384	147.813	417.544	108.308	211.822	260.726	186.654	212.92	123.806	425.857	210.572	810.44	205.621	440.215	212.817	546.116	182.519	643.297	152.371	1008.37	178.74	158.09	557.608	174.013	191.647	129.536	223.041
ENSMUSG00000008590	0	0	0	0	0	0	0	0	0	0.936208	0	0	0	0	0	0	0	1.01031	0	0	0	0	0	0	0	0	0	0	0	0	0	0	0
ENSMUSG00000008601	6.52999	0	4.0071	2.27664	8.31944	3.44784	12.7928	28.0412	4.65047	17.8851	0.890969	3.54192	10.2088	8.56057	21.3258	9.29161	33.672	1.5726	33.4754	1.32283	2.59417	2.8482	3.92108	0	23.6219	3.73358	21.4822	1.67392	5.16832	4.53677	2.63545	2.40334	1.33747
ENSMUSG00000008604	2361.23	1134.6	1515.14	785.937	886.59	1309.91	1759.82	1167.99	1342.17	623.458	1545.3	1901.86	1541.07	2034.9	1411.46	1348.84	1733.12	772.643	1673.57	1274.48	2111.2	832.823	1953.38	1105.2	1803.58	1545.68	1362.91	1696.47	946.357	2627.04	1285.14	1774.84	1377.16
ENSMUSG00000008658	0	0	0	5.10418	2.95843	2.89614	0	2.05656	6.49106	0	4.34621	0.733122	0	0	0	0	0	13.5827	0	0.732517	0	1.45006	0	11.7743	2.13209	2.16397	0.741434	0	2.19135	0	0.729691	0.690992	0.740615
ENSMUSG00000008668	24595.8	20764.1	16654.7	10051.5	15079.6	14828.5	17475.8	23488.3	17644.9	47365.3	19088.8	22217.7	25216.7	22247.2	25311.6	19831	24550.4	12420.4	23705.8	20367.9	23316.6	16943.5	18745.6	9707.83	23415.7	15149.1	21468.9	19197.8	12056.6	22250.8	20616.7	22796.4	20283
ENSMUSG00000008682	1795.85	2008.67	1214.18	1198.05	1465.41	1179.86	1848.03	2722.9	1557.52	3028.24	1445.8	2298.64	2860.93	1915.49	1801.16	1514.99	2023.07	1261.44	2073.93	1715.58	2463.76	1601.55	1471.22	1250.46	1813.45	2109.38	1752.07	1313.27	902.788	1617.53	2569.54	2138.71	2005.7
ENSMUSG00000008683	11239.1	12005.5	6698.89	6657.37	9884.41	8317.68	9218.59	14652	12220.2	31415.2	9877.9	11862	14576.4	10758.6	10735.2	9883.43	12221.3	9489.57	12281.9	12590.8	11549.5	11899.2	8637.09	5282.59	10766.5	10712.4	10426.6	9996.07	7090.48	11447.4	11585.4	13564	9574.57
ENSMUSG00000008690	2271.96	2504.69	1911.88	1321.32	1879.11	1844.72	2034.43	2734.01	2362.15	3486.41	2120.73	2748.61	3236.45	2459.4	2673.13	2100.89	3016.05	1426.87	2638.89	2647.34	2835.82	2107.8	2209.27	1318.59	2518.97	2223.73	2700.23	2132	1644.2	2425.62	2605.74	2871.85	2769.73
ENSMUSG00000008730	3546.67	3112.2	2841.18	4188.24	2809.64	4303.29	4193.96	3583.6	3340.42	1662.24	2875.93	3523.19	2740.61	4507.65	1931.85	2638.77	2758.94	4101.55	2769.7	3160.94	3058.71	3618.17	3188.64	2858.14	5359.67	4400.73	3036.52	3033.91	4501.55	3866.13	2746.56	3198.97	2970.55
ENSMUSG00000008734	67.6091	104.955	153.669	456.107	359.715	297.573	125.434	202.911	388.507	146.566	128.205	123.576	125.418	238.98	56.4295	130.984	105.452	620.578	89.1748	364.309	158.113	512.128	187.714	268.598	264.61	433.837	120.887	143.037	261.473	67.104	119.304	156.439	132.709
ENSMUSG00000008763	1550.53	1530.5	739.799	771.215	616.536	1667.89	1681.07	2093.16	1239.95	1210.26	863.774	1487.1	1503.73	1286.89	756.815	882.345	1051.14	1144.62	877.773	834.448	1579.21	1316.47	1389.16	931.665	1497.32	1103.66	891.012	1304.66	877.933	1617.19	1214.32	1598.32	1045.77
ENSMUSG00000008789	0	0	0	0	0	0	0	0	0	0	0	0	0	0	0	0	0	0	0	0	0	0	0	0	0	0	0	0	0	0	0	0	0
ENSMUSG00000008813	0	0	0	0	0	0	0	0	0	0	0	0	0	0	0	0	0	0	0	0	0	0	0	0	0	0	0	0	0	0	0	0	0
ENSMUSG00000008822	116.57	104.705	113.519	125.64	148.733	137.661	131.622	92.8423	135.116	168.767	97.6813	151.188	167.283	98.4834	145.192	140.802	136.083	120.297	151.956	162.106	151.116	145.382	132.184	85.5995	93.3557	145.976	141.608	106.852	118.132	122.726	136.215	120.236	118.297
ENSMUSG00000008843	2.95838	0.954335	2.01711	1.98855	6.05107	4.93639	0	0	5.8083	0	3.98477	5.99798	1.00033	0	1.02023	3.02789	3.0107	9.09278	2.0101	3.99536	1.99951	4.94321	2.96071	4.94186	0.977389	8.85219	1.01096	0.984404	2.98808	0	1.98996	0.942263	2.0198
ENSMUSG00000008845	101.76	60.9399	15.5247	64.4663	47.0874	41.5922	30.4433	88.3892	24.5766	23.4443	13.3539	41.0696	35.4717	88.7606	24.5143	30.5141	42.8607	70.6196	60.7365	38.3665	35.3153	31.2577	34.5453	48.4807	84.3192	136.256	26.4103	48.5764	60.2611	67.7145	27.5643	63.5708	30.5582
ENSMUSG00000008855	569.324	527.829	517.803	917.578	1103.94	953.033	603.885	604.905	1175.29	324.599	468.681	421.049	616.287	606.231	496.555	669.716	481.553	948.621	522.515	1286.07	680.97	1235.52	657.919	674.301	462.103	944.511	579.004	623.549	994.06	502.798	582.492	685.128	616.75
ENSMUSG00000008859	345.53	325.866	282.285	495.358	647.41	486.646	429.609	408.74	704.717	376.341	352.061	546.382	457.891	382.352	328.237	363.352	478.802	683.108	428.218	647.497	403.332	634.895	311.424	467.653	373.972	512.072	354.009	373.375	518.653	371.095	292.865	527.933	366.433
ENSMUSG00000008874	0	0	0	0	0	0	0	0	0	0	0	0	0	0	0	0	0	0	0	0	0	0	0	0	0	0	0	0	0	0	0	0	0
ENSMUSG00000008892	1646.9	1377.36	1349.59	858.305	1109.58	1347.2	1679.52	1225.01	1308.31	1425.25	1404.96	2116.69	2021.98	1503.49	1684.76	1459.19	2011.31	1087.13	1879.93	1627.54	2010.08	1275.57	1491.9	1052.24	1513.13	1303.26	1749.68	1526.58	975.538	1560.31	1812.62	1441.62	1509.9
ENSMUSG00000008932	0.766382	0	1.31836	2.2596	0	0	0.770428	3.69669	0	0	3.22399	0	0	0	0.791914	0	0	0	2.6271	2.32861	0	1.29356	0	0	0	0	2.64258	0	0	0	0	1.23154	3.13558
ENSMUSG00000008958	667.102	504.978	361.596	496.729	509.991	648.02	531.705	717.34	771.283	541.289	573.349	708.543	808.599	558.296	535.077	507.983	532.381	572.16	598.348	677.684	599.943	607.121	395.945	384.429	345.996	703.285	613.952	535.051	515.845	600.196	513.895	691.917	459.583
ENSMUSG00000008976	1439.88	1312.34	923.93	677.01	1024.2	1269.12	1246.02	1501.53	1185.13	901.77	1258.37	1649.51	1690.2	1417.33	876.448	1161.08	1277.94	1039.68	1566.59	1254.98	1593.17	1156.42	1235.38	1009.92	1568.15	1235.7	1305.43	1340.89	940.739	1498.42	1599.06	1565.09	1125.54
ENSMUSG00000008999	3.94453	5.72598	8.06846	54.6851	53.4512	27.6437	3.97032	3.77098	36.7859	3.745	7.96956	5.99803	4.00132	3.93571	3.06075	12.1115	5.01784	61.6288	3.01518	35.9581	2.99928	54.3751	5.92146	36.5698	7.81916	43.2774	6.06578	5.90645	65.7376	6.8512	3.9799	6.59573	4.03957
ENSMUSG00000009013	2364.25	1811.12	1756.47	1218.17	1357.96	1725.51	1992.37	1342.59	1404.65	1264.49	1965.12	2846.48	2337.38	2152.76	2201.2	2138.34	2557.86	1954.01	2640.17	2375.93	2451.84	1489.33	1930.36	1588.46	1075.53	1626.02	1956.4	1787.63	1427.75	2338.01	2068.69	2320.64	2051.7
ENSMUSG00000009030	526.932	384.505	395.743	392.822	362.929	462.502	469.824	459.076	504.811	482.548	397.593	502.325	502.552	480.823	354.517	370.57	519.98	405.803	505.748	515.644	506.209	595.268	421.197	390.57	440.527	569.457	459.049	430.025	427.796	481.07	561.16	495.358	405.889
ENSMUSG00000009035	525.1	602.252	351.881	781.68	579.178	903.508	592.548	712.931	683.001	242.522	354.844	651.01	498.729	600.29	321.989	489.265	365.701	935.652	402.478	795.873	495.871	884.211	596.958	905.699	864.819	973.809	476.428	602.322	651.872	400.692	392.834	719.439	469.623
ENSMUSG00000009047	0	0	0	0	0	0	0	0	0	0	0	0	0	0	0	0	0	0	0	0	0	0	0	0	0	0	0	0	0	0	0	0	0
ENSMUSG00000009070	0	0	0	0	0	0	0	0	0	0	0	0	0	0	0	0	0	0	0	0	0	0	0	0	0	0	0	0	0	0	0	0	0
ENSMUSG00000009073	1325.85	1505.19	890.39	1052.3	830.9	1148.45	1757.5	1697.27	1098.53	712.009	1246.15	1856.24	1351.28	1566.65	973.642	1243.57	1716.42	1148.24	1093.2	1002.98	2149.91	999.537	1258.49	946.364	1301.86	1552.57	1402.22	1338.06	798.113	1291.91	1431.24	1575.48	1046.51
ENSMUSG00000009075	0	0	0	0	0	0	0	0.942766	0	0	0	0	0	0	0	0	0	0	0	0.998841	0	0	0	0	0	0	0	0	0	0	0	0	0
ENSMUSG00000009076	255.78	229.22	224.677	194.428	268.799	237.665	214.207	224.083	248.248	305.401	230.733	266.441	265.448	232.854	252.408	237.755	287.979	182.784	284.869	285.979	297.288	235.07	198.128	193.37	254.672	240.549	276.49	218.331	227.829	277.922	238.32	251.96	231.015
ENSMUSG00000009079	8874.6	7500.92	6396.02	3353.04	4892.65	6681.58	7940.83	8267.76	6832.22	5092.91	6077.58	7978.46	7695.37	9056.08	6026.71	8176.8	7937.94	3905.77	7305.91	6931.06	8509.97	6213.45	6468.01	4028.8	9561.29	7988.91	6593.48	5738.81	3942.48	7373.63	7637.38	6647.69	7155.03
ENSMUSG00000009090	1391.18	959.045	902.985	2092.3	1753.99	1877.74	1473.45	1382.6	1878.25	626.468	1122.8	1458	1071.19	1523.34	824.147	899.817	979.612	1862.06	975.718	1842.39	1082.44	1733.72	1188.67	1107.69	1644.24	1818.28	1017.58	1134.89	2006.86	1421.53	1193.16	1056.86	1073.73
ENSMUSG00000009092	60.531	47.1252	34.2551	66.4498	46.0716	42.777	31.1101	49.7634	64.5558	12.6648	51.3958	72.703	52.1541	25.6749	38.6589	73.0787	54.215	27.5669	72.8094	74.4234	113.71	57.311	27.8432	49.5273	50.6279	49.8634	61.4076	51.4458	41.9769	33.7254	65.1731	50.3538	65.1796
ENSMUSG00000009093	0	0.936765	0	0	0	0	0	0	1.96649	0.950929	0	1.01535	0	0.999352	0	1.02513	0	1.02617	0.986564	0	0	0	0	0	0	2.89642	0.992358	0	0	1.92147	0	0	0
ENSMUSG00000009097	5.43808	10.7537	13.0384	87.4143	101.763	51.0738	10.6202	22.1508	72.9746	22.2614	23.1619	12.8271	13.5035	19.9718	12.0146	17.5842	8.87195	68.3713	14.8085	53.6539	13.8319	82.5971	13.6707	80.6786	11.5242	74.8419	20.1593	18.6326	84.0099	15.0939	14.8217	23.5841	21.8241
ENSMUSG00000009108	30.2851	14.7993	28.6254	1.07768	1.09372	15.5283	37.7806	24.3307	22.7374	26.0754	35.2323	46.9915	47.6942	31.574	35.2234	32.0008	69.7459	0	60.6293	14.246	41.2022	6.07548	34.2123	3.56647	18.316	14.526	35.5534	16.4975	2.57786	36.402	67.4069	21.1906	35.1332
ENSMUSG00000009112	1419	1247.98	805.284	581.798	525.144	989.462	994.421	1099.17	1534.09	1021.98	734.846	1056.53	867.259	1175.3	785.368	1030.61	1276.02	646.85	946.559	824.291	1395.21	1048.33	1048.2	732.898	893.028	778.349	1080.91	1159.05	521.674	1057.09	904.062	1519.53	864.849
ENSMUSG00000009114	0	0	0	0	0	0	0	0	0	0	0	0	0	0	0	0	0	0	0	0	0	0	0	0	0	0	0	0	0	0.978738	0	0	0
ENSMUSG00000009115	0	0	1.04276	1.028	0	0	1.02623	0	0	0	0	1.03357	0	0	0	0	0	2.08915	0	0.773349	0	0	0	1.02189	0	0	0	0	1.02981	1.01194	0	0	0
ENSMUSG00000009145	75.8255	79.5578	103.697	74.602	119.26	66.0633	91.1586	87.8894	95.9456	68.1664	121.769	108.218	115.313	105.034	102.642	123.409	113.119	87.968	117.952	72.1659	124.735	133.279	105.8	94.1353	50.7804	83.615	128.033	96.1581	108.609	87.0328	111.32	104.311	114.62
ENSMUSG00000009185	85.7932	46.762	135.146	807.351	542.58	387.999	108.19	75.4206	608.904	124.519	149.428	86.9707	127.043	67.8903	128.55	116.069	99.3529	1516.47	135.682	759.116	89.978	470.592	58.2274	969.593	111.423	408.184	73.8002	58.0803	1690.25	59.7033	78.6038	80.0914	124.217
ENSMUSG00000009207	416.606	251.007	330.657	197.12	191.226	267.332	389.665	260.821	195.766	185.436	298.692	412.366	415.603	373.769	347.82	330.975	392.089	240.931	350.434	282.199	441.176	198.575	288.134	167.901	460.028	286.235	392.049	271.171	187.07	336.793	398.728	295.692	327.492
ENSMUSG00000009210	0	0	0	0.829836	0	0	0	0	2.42384	0	0	0	0	0	0	0	0	2.52965	0.838832	1.26869	0	0	0	1.2554	0	1.2493	0	0	3.79535	0	0	0.786415	0
ENSMUSG00000009214	0	0	1.03624	0	4.39444	0	0	0.96863	0	3.84771	0.86815	0	0	2.02185	0	0	1.03112	0	1.03264	0	1.02719	1.01578	1.01399	1.0155	1.0042	2.02113	1.76205	0	1.02336	2.01121	1.0223	1.93623	0
ENSMUSG00000009216	0	0	0	3.9771	3.02552	0.987302	0	0	0	0	0	0	1.00034	0	2.04046	1.0093	0	3.03094	0	0.998875	0	3.95454	0	1.97674	0	1.96716	0	0	4.98015	0.978743	0	0	0
ENSMUSG00000009246	0	0	0	2.89953	2.71771	3.51781	1.4473	0	11.8434	0	0	0	1.46683	0	0	1.47164	0	3.31238	0.732719	0	1.46604	1.44154	0	2.89863	0	9.21268	0	10.5689	0.726157	0.713575	0	0	0
ENSMUSG00000009248	0	0	0	0	0	1.97456	0	0.94277	0	0	2.98857	0	0	0	1.02025	2.01861	0	1.01032	1.00507	0.998826	0	0.988624	0.986898	0	0.977394	0	1.01094	0.984396	0	1.95749	0.994995	0	2.01977
ENSMUSG00000009281	119.263	125.037	133.954	535.521	603.711	343.267	190.774	146.346	420.426	179.363	163.724	163.729	149.159	139.521	215.738	180.102	158.1	745.077	195.608	405.981	173.132	492.777	137.865	406.641	194.748	519.035	139.795	90.4266	447.164	176.026	141.731	147.064	154.561
ENSMUSG00000009291	546.257	606.596	340.265	1072.05	1035.88	816.233	534.628	544.864	1019.93	812.214	566.24	602.984	524.655	763.663	435.032	463.937	440.517	1295.48	467.035	1157.5	479.251	1104.46	467.814	882.657	527.471	850.7	416.643	387.113	932.963	479.73	380.35	679.533	519.05
ENSMUSG00000009292	194.895	269.471	158.784	391.601	451.856	480.604	360.536	259.966	355.002	79.0515	176.086	242.488	167.972	248.615	61.3384	292.395	205.264	396.504	100.607	475.934	172.261	579.233	195.864	381.734	328.364	524.892	115.443	113.865	539.221	135.298	261.405	172.64	68.9502
ENSMUSG00000009293	899.448	579.746	511.406	515.582	570.709	649.743	513.067	896.716	889.845	722.979	557.13	755.945	795.673	888.125	666.72	554.151	816.826	773.48	604.012	930.987	694.771	769.267	608.054	592.727	700.955	800.356	601.601	679.573	570.754	825.608	605.577	904	599.729
ENSMUSG00000009350	66.9343	9.72973	22.4362	44.6997	18.8506	29.5005	46.3817	30.437	19.1616	8.74982	30.4695	13.5893	23.7972	26.7504	51.9464	10.2902	29.5473	5.15025	33.3023	39.3415	15.2893	6.7197	9.22338	26.9008	32.6772	30.9194	21.4732	6.69093	41.5648	66.3803	8.031	19.2132	12.0123
ENSMUSG00000009356	0	0	0	3.15053	7.19019	0.782108	6.25456	0.746795	3.83427	0	0	0.791865	0.792409	0	0	0	0	85.1369	0.796132	4.74748	0	3.91581	0	3.1318	0.77428	2.33745	6.67872	0	5.52309	1.55065	0	0	0
ENSMUSG00000009376	26.3946	23.9952	66.1376	184.602	157.872	116.912	49.9139	32.7364	168.692	22.3198	80.9899	103.968	77.3247	70.4427	30.6176	48.2991	31.7451	397.854	112.12	92.3563	212.867	140.501	118.373	98.4843	30.1243	334.251	32.7991	38.5112	105.022	39.6922	56.7709	35.1553	49.9658
ENSMUSG00000009378	2.95834	5.72592	7.05989	51.7023	42.3575	21.72	5.95548	1.88547	18.393	2.80869	8.96566	11.9959	14.0047	6.88744	4.08101	4.0372	15.0535	87.8968	9.0455	34.9593	11.9971	24.716	3.9476	61.2791	2.93216	40.3266	7.07677	5.90644	45.8171	3.91498	16.9148	6.59572	13.1286
ENSMUSG00000009394	10.3717	10.2329	8.7133	23.0479	30.3761	23.7755	16.1755	14.1763	24.0346	12.9691	7.09533	15.1396	9.77991	16.98	8.7849	17.6731	10.2809	27.3207	11.4898	19.4196	3.72429	23.3153	11.569	8.49428	31.4499	31.0426	3.76604	9.06329	17.6788	13.9693	2.77989	11.0928	10.6617
ENSMUSG00000009406	139.132	144.001	135.783	214.199	191.531	194.362	169.718	143.787	195.553	115.315	144.234	169.954	143.823	167.878	109.529	157.108	124.101	212.763	148.189	189.977	165.296	229.313	136.651	193.726	145.415	240.829	165.445	146.079	218.483	127.308	153.531	143.494	150.239
ENSMUSG00000009418	179.349	161.567	179.97	960.929	725.382	729.418	378.81	243.973	827.052	86.0015	326.15	182.993	190.896	216.161	55.892	364.92	205.425	1017.62	211.56	994.515	169.279	733.591	252.348	1160.6	282.513	796.207	206.73	220.793	1225.55	193.209	138.51	221.597	265.32
ENSMUSG00000009470	5598.95	5044.83	3333.42	3310.52	2325.33	3837.04	5710.38	6099.65	3835.39	3082.31	4024.48	6313.89	5414.52	5704.42	2783.59	3594.67	4539.29	3036.39	4123.57	3945.34	5527.82	3623.43	5123.09	3011.51	6002.1	4420.8	3815.06	5222.59	3016.29	5619.67	4696.25	5594.05	3631.31
ENSMUSG00000009471	0	0	0	0	0	0	0	0	0	0	0	0	0	0	0	0	0	0	0	0	0	0	0	0	0	0	0	0	0	0	0	0	0
ENSMUSG00000009487	0	0	0	0	0	0	0	0	0	0	0	0	0	0	0	0	0	0	0	1.99776	0	0	0	0	0	0	0	0	0	0	0	1.88448	0
ENSMUSG00000009535	1126.86	893.171	960.26	346.667	540.339	717.489	931.382	1154.23	798.491	1485.66	1254.18	1660.13	1826.93	1077.7	1286.59	1286.14	1546.83	483.609	1652.57	974.957	1696.56	685.031	746.776	407.688	1234.48	789.793	1355.43	916.423	524.319	835.208	1444.06	817.24	1224.69
ENSMUSG00000009545	6.59879	9.2887	7.55569	13.3066	11.0431	52.0434	60.1721	139.34	55.7412	48.2137	4.84809	8.51373	98.1614	11.3723	50.6779	7.36781	50.46	9.21901	51.7576	7.29145	53.9176	17.4411	6.00364	50.2974	55.0897	10.1717	47.757	5.98844	13.936	52.7844	4.84223	51.3896	5.52912
ENSMUSG00000009549	890.406	814.273	839.055	690.05	936.59	826.976	970.942	712.145	829.039	1205	727.749	1024.81	1053.36	912.672	1042.32	832.787	1134.13	848.758	1087.01	984.963	982.47	886.087	721.819	594.623	889.641	946.832	905.084	805.634	707.99	949.24	892.348	813.97	855.474
ENSMUSG00000009551	0	0.598827	0	0	0	0	0	0	1.09414	0	0	0	0	0	0	0	1.13429	1.14191	0	0	0	0	0	0	0	0	0	0	1.12576	0	0	0	0
ENSMUSG00000009555	2693.31	2065.52	1605.74	1280.8	1190.24	1785.43	2306.09	2227.56	1479.61	1750.26	1816.14	2439.07	2015.95	2505.31	1776.62	1991.82	2293.74	1288.59	2218.03	1357.89	2055.52	1454.17	1973.11	1265.81	2663.84	1910.4	1923.1	2003.89	1463.9	2386.16	2142.06	2092.55	1768.84
ENSMUSG00000009563	440.328	736.901	370.807	444.995	447.099	442.345	384.272	437.191	719.101	784.213	260.09	319.672	346.297	398.21	309.917	274.305	625.487	535.15	389.276	636.296	358.184	406.227	371.797	256.965	405.066	329.642	292.736	340.17	336.879	468.066	322.8	386.216	399.622
ENSMUSG00000009566	771.423	553.28	732.669	213.641	321.687	395.525	575.343	710.336	385.604	446.545	960.633	1043.18	752.916	789.347	1033.36	831.734	959.726	255.75	878.707	450.794	1273.81	409.101	607.408	270.694	1070.53	420.49	920.471	708.645	242.623	867.075	1110.05	547.647	759.108
ENSMUSG00000009569	641.783	532.903	492.782	612.174	524.536	604.145	590.163	559.866	668.201	210.868	541.868	597.253	472.445	711.927	269.435	412.013	459.696	621.452	411.106	586.105	594.531	574.413	502.14	592.666	622.928	565.976	366.51	480.811	644.907	519.764	625.135	474.13	398.688
ENSMUSG00000009575	6873.65	6890.42	3846.46	1406.94	1454.59	3100.93	6527	5876.38	4931.81	2946.35	5851.71	8599.11	7498.65	7079.17	4194.41	5986.28	5377.59	1501.35	6286.16	3722.68	7549.2	2763.05	6207.5	2354.71	4241.61	4678.73	6199.58	7455.08	1508.61	6427.36	7524.65	7912.6	5892.04
ENSMUSG00000009580	0	0	0	0	0	0	0	0	0	0	0	0	0	0	0	0	0	0	0	0	0	0	0	0	0	0	0	0	0	0	0	0	0
ENSMUSG00000009585	3123.81	3330.84	2712.52	4200.96	4055.73	3996.08	3094.44	4257.4	3965.63	2368.68	3280.63	3908.08	3379.18	3691.53	2637.28	3115.64	3504.59	5002.47	3416.45	4130.81	3449.62	4408.43	3036.7	3659.1	3647.42	4149.61	2874.69	3119.04	4431.27	3233.16	2994.41	4170.03	3083.37
ENSMUSG00000009588	0	0	0	0.994254	0	0	0	0	0	0	0.9962	0	0	0	0	0	1.00359	0	0	0	0	0	0	0.98838	0	0	0	0	0	0	0	0	0
ENSMUSG00000009596	0	0	0	0	0	0	0	0	0	0	1.51149	0	0	0	0	0	0	0	0	0	0	0	0	0	1.59567	0	0	0	0	0	0.812179	0	0
ENSMUSG00000009614	25.4728	32.648	14.8538	59.1529	214.433	94.3955	29.1052	31.0153	58.1914	20.4681	54.7887	12.4921	41.9157	41.0688	11.3833	32.3871	36.6711	140.546	30.7975	66.152	30.6022	120.738	45.7456	48.9689	54.7522	136.946	35.6806	10.5442	51.9425	19.3958	26.6166	45.6306	77.2608
ENSMUSG00000009621	1576.92	978.433	1088.91	1164.11	1327.08	1160.72	1354.65	950.129	1365.75	365.278	1186.67	1446.47	1206.68	1373.73	452.886	1058.68	1442.08	1774.4	1025.15	1306.83	981.157	1954.39	1074.38	720.702	1290.37	1757.88	1579.05	1219.9	796.081	1143	1098.46	1600.39	1688.16
ENSMUSG00000009628	0	7.3131	4.72213	6.80591	6.90328	11.2373	3.39712	0.645388	5.14461	0	1.36385	0.684193	0	2.31095	0	4.74098	0.687008	6.91565	5.34116	12.527	0.684398	2.81938	1.46345	5.41236	0	11.9501	2.07596	2.31207	12.4919	1.45122	1.36213	2.213	0.691211
ENSMUSG00000009630	1013.74	901.839	741.287	568.725	661.585	697.017	874.456	926.73	796.706	780.819	760.093	1153.61	1102.37	1016.39	898.832	855.885	1091.88	705.195	1098.52	947.896	1109.73	787.946	839.856	570.291	1034.08	869.481	905.822	829.859	636.46	968.956	939.266	914.927	788.728
ENSMUSG00000009633	53.2509	41.0361	46.3934	124.284	142.2	82.9312	28.7846	37.7103	64.8594	25.2783	43.8323	52.9822	31.0104	56.0833	58.1537	69.6416	43.1533	251.567	85.4294	106.876	65.9839	137.421	37.5024	83.0232	50.8243	103.276	37.4056	28.5479	92.6303	56.7671	35.8194	36.7478	71.7025
ENSMUSG00000009640	258.937	277.596	217.641	235.206	292.714	247.342	223.693	302.063	363.965	269.624	227.66	288.084	290	261.386	246.15	253.449	293.066	268.99	279.41	312.017	260.118	323.308	270.701	205.608	353.271	283.611	304.048	255.119	206.179	270.096	243.618	270.33	276.418
ENSMUSG00000009646	0	0	0	0	1.00852	0	0	0	0	0	0	0	0	0	0	0	0	0	0	0	0	0	0	0	0	0	0	0	0	0	0	0	0
ENSMUSG00000009647	217.519	148.795	133.233	195.636	195.933	203.2	193.133	131.097	230.61	74.7183	165.786	219.969	185.087	180.223	150.04	158.482	166.224	235.888	174.687	251.439	177.277	220.33	169.898	184.927	166.926	242.092	173.412	147.072	190.098	169.928	182.649	159.91	141.454
ENSMUSG00000009654	1.65308	11.2729	1.69063	2.50005	0.845277	0.827506	1.66383	0	11.435	0	0.83494	1.67575	0	3.29867	4.27557	1.69189	0.841124	1.69357	2.52715	11.7987	0	10.0294	0	1.65682	0	1.6488	1.69471	0	2.50446	0.820351	0.833932	0.789739	0
ENSMUSG00000009670	0	0	0	1.79092	0	1.77829	0	0	0	0	0	0	2.30883	0	0.918833	0	0	0	0	0	0	0	0	3.42185	0	0.885838	0	0	0	0	0	1.08741	0
ENSMUSG00000009681	374.035	236.691	215.064	621.75	586.433	364.874	316.669	387.993	422.248	98.9409	458.944	372.731	302.575	437.571	160.325	424.389	357.338	532.371	194.781	504.202	263.532	535.066	240.828	535.76	324.691	707.243	314.727	389.697	551.979	348.617	335.676	362.878	364.014
ENSMUSG00000009687	962.462	1000.53	931.82	2250.91	2436.7	2101.49	1568.95	980.026	2209.04	917.9	1142.55	1219.18	1122.65	972.028	1019.18	1136.53	1117.68	2428.19	1099.03	2032.89	1153.93	2607.46	944.113	1680.68	1190.59	2028.44	1159.38	902.467	2601.19	976.486	1047.44	1154.08	1119.36
ENSMUSG00000009731	7.79574	12.2596	13.9529	45.196	107.839	39.0243	17.6551	11.1794	45.9173	3.70063	14.7663	11.8541	18.7817	16.5289	9.07361	24.9343	14.8756	59.902	10.9249	47.3774	18.7709	50.8016	14.6285	45.9044	5.79499	41.7938	21.9783	13.6188	49.2125	14.5076	17.698	14.8979	34.9286
ENSMUSG00000009733	131.175	159.734	187.888	179.911	187.461	156.867	148.287	74.6188	192.564	104.095	180.993	147.334	125.842	145.172	69.8461	101.71	91.2508	208.458	119.929	124.819	143.532	264.312	175.594	261.104	46.4322	290.729	114.124	105.39	171.168	134.96	171.564	101.407	129.342
ENSMUSG00000009734	0	0	0	2.10691	0.295845	0	0	0	0	0	0	3.08795	0	0	0	0	0	0.296393	0	0	0	0	0	0	0	0	3.12283	0	0	0	0	0	0
ENSMUSG00000009739	40.4501	125.682	169.265	830.201	813.649	590.554	160.758	172.965	662.18	65.2019	162.19	183.019	65.5937	145.835	55.3665	201.723	129.362	872.743	152.806	608.085	82.808	983.795	78.5949	558.918	140.338	611.928	95.0321	109.744	725.794	76.2488	72.1746	107.557	143.298
ENSMUSG00000009741	1629.41	1479.85	1402.68	1873.85	2149.45	2017.53	1586.54	1639.97	2001.05	1317.59	1652.4	2060.08	1851.55	1815.93	1545.06	1720.85	1829.1	2278.04	1749.77	2114.28	2000.52	2274.04	1469.34	1586.37	1976.64	2132.51	1511.07	1471.93	2059.61	1496.18	1666.61	1532.49	1606.11
ENSMUSG00000009772	349.584	462.857	465.595	490.096	513.545	471.824	349.945	385.329	485.118	293.748	646.941	607.444	548.992	401.134	523.54	568.88	496.53	651.539	590.387	632.008	520.977	620.354	354.605	457.4	427.075	421.024	442.482	361.882	519.111	343.787	410.027	560.493	487.2
ENSMUSG00000009828	115.401	117.188	89.2296	159.224	183.246	133.399	129.755	115.986	166.363	93.1498	103.551	128.639	99.6529	131.803	90.3451	100.642	82.5613	198.697	118.091	145.225	124.934	169.091	96.4535	126.51	156.048	179.68	105.745	108.417	163.56	94.0496	78.9395	121.129	87.672
ENSMUSG00000009863	1763.9	1441.63	1544.62	978.013	1171.07	1362.27	1637.11	1482.95	1584.81	1948.21	1796.14	2240.57	2212.75	1749.76	2131.91	1713.31	2282.05	1149.92	2362.4	1531.15	2335.34	1423.11	1583.67	917.972	1688.68	1480.61	1990.15	1562.04	1039.77	1785.47	1765.79	1756.56	1898.91
ENSMUSG00000009876	12.8245	8.59221	12.1072	43.7647	43.3826	31.6048	8.93654	12.1085	32.9263	5.61955	5.97942	7.00031	8.00573	11.8115	6.12377	10.0968	10.0395	54.5774	12.0652	52.9585	14.0019	41.5387	8.88553	48.4486	12.7109	34.4383	18.2042	8.86307	107.612	9.79116	4.97681	12.2539	10.1028
ENSMUSG00000009894	71.6591	70.226	96.5828	199.916	313.673	177.013	73.9534	52.031	237.587	51.671	101.713	125.056	88.3341	65.1632	80.7071	88.197	98.6457	245.253	94.2974	172.463	88.9128	185.515	68.9922	210.408	50.3462	251.504	66.9543	70.6288	231.774	100.721	97.9289	128.998	103.266
ENSMUSG00000009900	0	0	0	0	0	0	0	0	0	0	0	0	0	0	0	0	0	0	0	0	0	0	0	0	0	0	0	0	0	0	0	0	0
ENSMUSG00000009905	256.244	463.721	266.742	244.47	265.916	233.965	461.045	553.588	268.714	659.067	310.423	459.132	333.341	434.422	299.539	493.699	426.747	315.643	336.967	463.028	481.98	275.279	414.307	258.334	605.624	377.693	324.02	365.098	239.269	489.75	354.771	320.691	323.457
ENSMUSG00000009907	1677.38	1525.56	1376.74	1414.83	1409.44	1446.4	1488.89	1486.93	1378.53	1174.68	1626.99	1957.32	2079.81	1624.21	1649.06	1530.1	1691.7	1663.29	1859.61	1629.83	1840.66	1608.25	1264.57	1285.37	1769.56	1757.19	1719.17	1396.71	1366.7	1549.82	1899.38	1412.13	1664.82
ENSMUSG00000009927	12053.5	10450.5	8860.18	5105.82	7309.55	7250.54	9202.9	11536	9067.17	28549.7	9405.49	12397.4	13204	10984.3	12818.7	10224.7	13259.3	5991.21	12536.2	10347.3	12758.2	8238.53	9257.15	4950.04	11527.7	7346.82	11010.5	9424.6	5980.62	10920.1	10676.9	11262.5	10234.6
ENSMUSG00000009941	1.064	2.05936	2.17636	2.43673	4.35258	0	4.05424	1.0172	3.13345	2.02032	3.2552	1.07857	4.31727	2.1232	3.3024	1.08897	0	3.27024	0	1.07771	2.1574	3.20007	1.61245	5.65191	2.10913	1.06125	2.18156	1.06215	2.441	0	0.812823	0	3.26889
ENSMUSG00000009995	437.299	515.44	396.939	891.54	1223.19	991.231	524.562	452.171	1161.32	577.121	555.588	477.327	519.584	521.817	482.083	485.135	432.339	1075.69	383.285	922.167	559.936	1302.3	477.667	732.594	367.06	886.09	436.719	441.097	753.937	417.313	510.289	619.507	461.589
ENSMUSG00000010021	16.4516	8.97796	9.91015	29.4111	30.9131	105.204	8.63878	17.4994	38.7624	4.97961	29.0928	13.6891	0.967378	9.19114	9.50201	15.0805	6.30822	29.2039	6.83786	24.4186	16.1194	50.1988	38.4591	26.2009	12.4538	103.966	12.6273	14.9784	42.9472	21.8892	26.5988	30.4139	19.5873
ENSMUSG00000010025	600.691	438.414	501.308	758.206	689.249	737.423	559.622	500.09	630.036	206.24	526.717	727.053	586.025	601.142	421.622	569.892	500.609	1128.57	531.608	608.303	722.539	556.104	628.027	707.966	614.927	921.456	489.801	445.075	740.037	673.942	442.167	549.886	583.709
ENSMUSG00000010044	2.13314	1.97698	2.78575	3.43289	7.84005	7.832	1.37081	0	1.50009	0	7.0859	8.00486	2.06682	0.679415	3.52253	6.2594	0.692986	8.50042	6.69396	4.8281	5.57202	4.09611	1.5293	13.3445	2.11425	4.25526	0	2.12944	2.75114	4.23435	2.15231	8.15296	6.27627
ENSMUSG00000010045	231.74	252.897	182.548	318.168	289.443	319.877	232.262	269.629	379.476	203.163	238.089	267.91	219.074	278.449	208.129	222.046	267.952	390.989	274.379	402.531	245.94	322.296	218.106	275.756	239.461	367.857	203.203	228.383	307.772	268.176	227.852	326.962	196.929
ENSMUSG00000010047	211.864	100.052	156.476	340.759	257.862	311.033	187.19	148.145	285.391	72.1933	140.392	188.39	139.385	193.233	96.3669	123.288	132.256	397.824	213.874	330.565	83.344	366.402	154.796	388.713	241.289	453.095	102.119	116.576	474.261	247.179	109.439	184.132	174.343
ENSMUSG00000010048	1594.71	1341.64	1162.53	338.04	576.862	940.623	1389.12	1168.52	1103.49	966.875	1193.8	1553.87	1244.36	1677.62	1290.1	1159.72	1404.4	382.284	1285.06	1102.47	1409.42	738.676	1447.27	598.212	1122.41	1023.96	1345.58	1261.17	517.043	1632.19	1256.53	1463.15	1316.4
ENSMUSG00000010051	31.8672	28.7078	40.8234	100.078	94.1812	96.5261	28.7304	53.1213	88.4558	18.2242	35.8097	63.9933	46.0438	43.9081	23.8135	54.9914	34.7788	195.813	70.0913	119.746	49.7404	72.3742	38.9685	137.531	20.767	135.068	40.1663	43.3666	116.144	44.8426	51.0122	24.4588	35.8755
ENSMUSG00000010054	351.722	445.695	242.705	280.533	485.809	371.569	208.649	303.236	496.846	340.695	212.427	338.989	233.982	240.244	203.052	337.182	260.312	598.376	256.377	360.165	398.987	391.062	287.646	293.338	174.454	313.957	261.967	190.479	330.066	353.252	237.161	406.218	229.706
ENSMUSG00000010057	160.208	196.919	160.63	247.516	346.689	272.004	147.403	185.121	287.561	103.02	181.922	206.863	174.287	132.368	209.236	172.081	185.957	302.693	236.933	280.584	235.069	308.67	172.02	219.345	86.1145	249.61	165.151	159.037	363.443	185.261	218.299	234.134	153.011
ENSMUSG00000010064	0	0.779844	0.824136	3.24984	4.98297	1.61349	1.62213	4.3707	1.20316	0	0.814018	1.63372	3.26968	0	2.50105	4.00924	0	9.11407	4.10635	2.44855	0	1.61571	0.806442	1.61529	1.59734	4.82234	13.9531	2.41323	0.813878	0	0	2.30986	0
ENSMUSG00000010066	3.17051	23.8312	5.67451	41.0029	15.0623	12.2876	6.33862	3.03108	30.8575	10.7748	1.65312	1.65884	2.41211	0	0	22.7132	3.22655	17.8653	3.23138	14.089	2.41076	24.4885	3.64301	5.561	11.0753	13.1138	3.35528	1.63354	13.6098	1.62424	4.95338	3.90909	9.80982
ENSMUSG00000010067	482.426	409.795	364.534	540.937	626.417	514.412	387.682	492.047	594.41	383.335	434.56	491.745	455.815	557.884	414.236	493.112	545.591	729.171	435.44	829.163	449.747	683.813	364.275	529.598	483.016	582.165	458.796	362.573	578.377	489.342	394.145	508.887	458.227
ENSMUSG00000010080	0	0	0	0	0.720087	0	0	0	0	0	0	0	0	0	0	0	0	0	0	0	1.41018	0	0	0	0	0	0	0	0	0	0	0	0
ENSMUSG00000010086	0	0	0	0	0	0	0	0	0	0	0	0	0	0	0	0	0	0	0	0	0	0	0	0	0	0	0	0	0	0	0	0	0
ENSMUSG00000010095	2472.96	1874.11	1497.33	1051.12	1506.22	1600.21	2272.29	2345.33	2071.63	1796.8	1845.34	2274.23	2403.73	2810.96	1669.73	1797.01	2622.23	1615.49	2705.34	1958.31	2549.93	1685	1625.9	1441.14	2236.62	1668.69	1732.58	2181.7	1510.73	2195.94	1797.95	2461.03	1560.29
ENSMUSG00000010097	2859.11	2576.24	2951.85	3784.86	4482	3549.19	2914.94	2596.46	3881.67	1861.8	3140.79	4018.61	3541.33	3118.48	3425.58	3737.82	3502.18	4571.75	3770.41	4274.06	3836.54	3670	2491.75	3573.12	2474.83	4130.7	3143.46	2447.49	4070.81	2945.97	3328.48	2939.39	3674.6
ENSMUSG00000010110	557.366	500.453	547.138	885.12	872.864	780.689	483.265	638.037	1037.97	574.319	610.187	713.208	697.54	691.83	562.875	734.709	633.789	1248.77	734.964	1002.32	710.88	964.861	628.132	725.201	631.627	1062.35	596.735	655.593	913.366	662.301	666.308	698.038	656.749
ENSMUSG00000010122	1.81877	9.6807	0	0	0	0	1.8307	6.08576	6.70941	3.45349	0.918658	0.921875	1.845	27.2786	0	0	0	0	0.926845	0	0.921938	0	6.37077	0.911467	4.50664	1.81406	0.813785	4.53905	0.918525	3.61035	2.75265	6.08253	0
ENSMUSG00000010136	0.991113	0	0.931927	2.99792	0	1.98455	0	0	4.86476	0	1.00123	1.00473	1.00541	0	1.02541	2.02881	0	0	0	3.01167	0	0.993636	0.991901	0	0	0.988559	0	0.989385	4.00425	0	0	0.947026	0
ENSMUSG00000010142	1512.38	1198.2	778.374	1400.92	1678.99	1382.97	1653.03	914.209	2279.21	1411.42	1321.65	1076.43	1263.53	1199.99	1126.46	1079.69	1141.91	1264.77	1077.92	1766.97	1226.14	2035.63	1293.33	799.007	1118.55	1326.85	1077.04	1342.3	1171.68	1071.04	1215.56	899.431	1107.53
ENSMUSG00000010154	2.74535	4.428	7.48741	3.01742	4.08083	0	2.00815	3.81475	6.85494	3.7884	5.03871	6.06754	0	2.98598	3.0962	3.06299	7.10641	5.11012	5.08354	2.02083	4.04543	1.83491	1.99672	2.9995	0.988741	8.95487	4.09076	0.995811	1.0076	5.94058	2.01306	9.53181	4.08646
ENSMUSG00000010175	41.4846	77.126	58.2696	308.001	173.966	230.319	78.7663	60.8767	142.535	22.4318	73.3388	86.0196	56.4286	75.2575	28.288	88.8507	52.4379	217.339	51.8899	205.321	43.9696	224.02	53.7837	267.429	53.2652	262.369	43.4958	44.236	304.734	68.2481	46.6138	76.0739	61.7954
ENSMUSG00000010205	3944.01	3395.18	2723.12	1830.11	1924.77	2826.5	3222.52	3394.33	2791.47	1752.37	2951.21	3615.07	2957.3	3798.01	2602.43	2878.4	3049.01	1615.33	2962.99	2779.56	3404.16	2586.85	3343.14	1755.36	3620.31	2454.15	3161.52	3604.11	2005	3489.14	2836.29	3818.72	2892.28
ENSMUSG00000010277	4630.86	4556.88	2777.12	3571.05	3988.2	4879.88	4376.12	4221.34	4732.15	2237.45	3452.56	4848.07	4142.11	4507.17	2988.47	3799.42	3698.18	4171.4	3661.96	4728.6	3842.18	4467.92	4422.03	3349.46	3931.72	5036.34	3645.22	4222.26	3202.03	3839.71	3831.23	4456.08	3667.76
ENSMUSG00000010290	400.368	327.334	372.156	311.208	313.648	352.458	393.059	327.137	308.808	292.105	482.156	594.8	581.196	429.972	460.128	433.998	504.793	416.247	523.632	358.583	506.876	411.274	355.286	323.198	390.956	395.398	460.999	370.139	327.692	380.731	509.432	299.636	513.027
ENSMUSG00000010307	198.254	192.179	169.806	699.708	672.736	442.681	372.589	111.11	578.605	165.13	195.506	172.739	144.489	137.758	150.076	267.43	262.389	855.881	157.639	792.211	166.549	682.823	120.686	689.102	141.298	585.963	187.893	93.3387	825.156	168.1	132.254	185.324	158.398
ENSMUSG00000010311	0	0	1.5141	2.46519	4.61649	2.44785	1.20363	0	1.4533	2.54082	1.37486	0	1.50177	2.43951	0	0	0	3.03347	2.08067	2.47652	0.689887	1.63416	1.19674	0	0	3.01512	0	0	1.20781	0	4.55459	0	0
ENSMUSG00000010342	2.94212	2.84725	1.50453	2.96644	6.01787	4.41835	2.96134	12.8545	18.0533	14.3912	0	0	0.746173	2.93551	0.761014	2.25842	0	5.27497	0.749626	18.1857	2.23705	27.2975	1.47226	7.37205	15.0238	30.284	1.50811	1.46847	41.2055	1.46006	0.742093	1.40564	19.1877
ENSMUSG00000010358	341.838	345.974	513.485	612.83	632.881	921.494	458.569	538.8	651.333	497.129	567.208	640.247	511.428	343.178	532.403	575.603	452.545	781.59	579.381	745.018	503.255	816.23	445.934	765.23	736.192	698.415	549.374	388.651	657.638	390.709	421.132	727.117	657.231
ENSMUSG00000010362	190.026	176.777	183.7	234.202	277.484	209.791	238.961	164.998	221.026	264.989	193.044	194.956	231.562	197.408	185.158	237.033	192.234	234.414	216.121	304.6	211.536	249.618	220.145	175.764	168.369	211.241	193.675	165.775	214.837	199.952	183.141	239.125	216.066
ENSMUSG00000010376	1672.2	1349.78	1348.37	814.611	1104.69	1103.33	1409.28	1372.19	1348.32	1745.23	1319.15	1840.22	1954.31	1621.8	1878.59	1488.92	1927.31	957.69	2044.49	1501.06	1814.68	1203.06	1419.78	894.838	1675.13	1239.05	1661.71	1388.92	951.798	1543.89	1726.25	1646	1623.39
ENSMUSG00000010392	940.959	700.39	539.636	682.953	610.251	666.536	892.033	649.684	524.124	460.73	543.487	754.598	667.328	818.927	478.565	516.055	769.532	691.343	692.506	844.95	733.467	776.385	527.457	581.259	889.109	911.762	544.266	594.948	649.746	750.52	719.334	576.759	449.213
ENSMUSG00000010406	557.113	542.064	375.565	314.456	513.034	443.286	526.519	585.237	612.709	953.594	392.031	604.495	578.451	622.752	534.529	476.649	637.729	375.948	642.247	678.577	617.466	590.082	487.584	292.927	584.613	399.34	474.201	462.78	341.656	617.733	449.578	587.038	514.535
ENSMUSG00000010435	0	0	0	0	0	0	0	0	0	0	0	0	0	0	0	0	0	0	0	0	0	0	0	0	0	0	0	0	0	0	0	0	0
ENSMUSG00000010453	1480.56	1039.04	1397.2	1229.58	1214.31	1322.48	1113.03	1511.6	1323.2	1211.78	1534.34	2019.94	1574.55	1737.47	1421.01	1559.74	1409.05	959.465	1388.88	1527.38	1342.8	1307.15	1317.75	693.943	1693.2	1708.86	1256.45	720.429	1115.03	1480.12	1237.8	1454.14	1576.63
ENSMUSG00000010461	0	0.817896	5.31331	5.1125	18.7389	7.11157	2.65514	2.42381	0.829588	0	0	1.71342	4.56009	0.8432	1.3645	0.864926	1.7201	4.32913	6.45837	11.4857	3.42716	4.23632	1.49961	5.92915	3.35049	5.90045	0.866401	1.4958	8.48124	1.67752	2.55808	5.72704	2.59646
ENSMUSG00000010476	41.4085	36.9089	39.4191	201.606	216.55	229.259	55.7576	34.6001	294.187	14.5288	49.3996	67.25	51.1366	53.8053	27.0211	64.1551	61.3187	224.638	56.7869	297.66	39.1868	283.985	41.3309	170.179	41.3179	316.765	51.4689	86.6416	187.886	47.4022	52.1987	53.3854	57.0979
ENSMUSG00000010492	0	0	0	0	0	0	0	0	0	0.438213	0	0	3.18579	0.460549	0	0	0	0	0	0.467529	0	0	0	0.462632	12.7568	0	0	0	0	0	0	0	0
ENSMUSG00000010505	0.548131	0	0	0	0	0	0	0	0	0	0	0	0	0	0	1.37677	0	0	0	0	0.555745	0	0	0	0	0	0	0	0	0	0	0.523785	5.48217
ENSMUSG00000010517	845.07	614.197	589.249	553.238	520.747	666.241	926.637	633.267	539.317	563.192	691.468	1001.07	1163.36	829.836	811.351	779.25	1062.21	571.851	1102.92	774.854	1160.32	758.641	788.555	482.063	833.892	844.982	991.465	774.475	549.889	809.935	1007.81	584.163	803.098
ENSMUSG00000010529	1.97226	2.86299	1.00855	7.9542	12.1021	2.96182	4.96287	0.94276	9.68052	0	0	0.999664	1.00034	0.983921	2.04049	1.0093	2.00713	12.1237	5.02526	12.9849	0	9.88639	1.9738	9.88372	0	5.90146	2.02193	1.96881	1.99205	2.93623	0.994979	0.942256	1.00991
ENSMUSG00000010538	51.0329	44.6152	36.1027	17.5082	31.7882	32.3807	41.798	35.9628	49.7038	61.7821	33.6186	55.1224	54.5287	49.1827	45.0147	39.81	49.4059	24.0944	59.8279	49.8436	44.2471	42.3784	35.5449	18.9423	38.6629	41.5028	39.8437	39.6806	29.6364	34.8229	47.2978	51.749	54.2019
ENSMUSG00000010554	966.732	882.302	852.606	432.877	564.523	687.953	977.44	890.158	928.893	416.804	1024.69	1734.12	1440.2	1033.53	1029.09	943.983	1433.69	517.624	1385.89	1154.65	1243.35	682.734	742.691	617.897	559.524	994.456	1222.1	824.418	544.835	1028.82	1208.25	1120.16	1053.29
ENSMUSG00000010592	0.58787	0.568893	0.601227	1.18544	0	0	2.78369	0	0.577101	0	1.3969	0.595944	0	0	0	0	0	1.80685	0	0	0	7.16356	0	7.16163	7.20199	7.12688	1.20535	0	0.593778	0	1.39523	0	0
ENSMUSG00000010601	0	3.29852	0.512426	2.40052	0	1.71777	0	0	0	0	1.72172	0	0	1.70051	0	0	0	0.870368	0	0	0	1.70944	0	1.01655	0	0	0	0	1.05097	0	0	0	0
ENSMUSG00000010607	118.851	138.293	91.1346	88.7468	158.717	93.4216	106.775	118.319	128.243	207.958	107.165	116.5	101.632	123.485	137.19	101.537	131.323	114.721	106.116	119.388	145.638	129.986	109.249	79.7426	123.639	85.2339	125.872	113.742	113.099	111.137	112.981	121.072	103.609
ENSMUSG00000010608	3987.23	3141.21	3590.08	3419.44	3428.12	3710.35	4097.11	3566.36	3893.46	1466.27	4343.71	4527.45	3724.32	3719.05	3158.63	4016.02	3502.61	3462.8	3338.07	4128.93	3552.28	4427.63	3087.68	2981.63	4676.49	3602.05	3225.86	4116.76	2898.15	4151.03	3635.76	3330.58	4702.62
ENSMUSG00000010609	275.453	363.688	335.772	866.886	901.044	747.51	301.723	829.074	787.088	624.403	342.246	345.397	339.351	354.407	403.192	623.15	427.298	958.025	384.251	658.499	347.437	1297.35	241.086	633.962	324.431	1301.47	307.437	526.573	984.627	436.57	341.842	463.451	538.803
ENSMUSG00000010651	0	0	5.4858	30.4954	14.2321	11.3978	1.23648	0	21.4796	2.58366	1.22514	2.71579	1.23012	1.23189	3.79929	11.462	0	36.9436	4.05343	8.37807	5.68429	24.1419	5.75276	9.90728	5.82153	24.9155	5.60462	4.94607	8.41312	0	10.1798	0	7.22107
ENSMUSG00000010660	47.0549	47.6511	63.9938	202.506	205.588	127.208	77.5351	38.8203	153.74	17.6982	44.8216	54.8919	34.4181	72.7796	41.3275	55.956	44.2655	209.031	41.617	125.747	49.3805	145.484	35.5353	123.048	36.5791	136.768	54.038	36.7541	175.487	27.9593	20.1893	45.748	77.9817
ENSMUSG00000010663	426.007	387.457	422.584	423.561	492.154	433.414	398.021	371.446	520.812	228.441	483.152	594.8	625.21	454.57	502.978	465.287	512.821	565.773	535.693	528.385	676.834	473.558	470.754	392.384	386.069	518.345	517.613	443.97	398.41	383.667	519.382	492.798	511.007
ENSMUSG00000010721	36.0262	35.5356	28.8929	161.482	102.396	63.1899	46.0872	38.3774	60.1605	29.6586	30.8351	37.6581	18.4999	63.5545	49.0238	28.0849	32.2055	62.9883	48.4365	54.8219	31.0154	59.0898	50.0833	58.638	37.4845	81.4201	20.3118	42.2848	86.6018	24.2458	43.1615	80.399	63.9964
ENSMUSG00000010751	90.197	107.247	210.787	185.516	186.191	217.289	184.557	172.273	150.543	87.4415	186.886	84.1292	166.985	177.339	143.174	145.459	145.412	285.229	125.227	173.806	222.669	151.499	179.211	117.322	227.592	211.603	126.899	118.909	105.09	132.115	99.8307	200.152	161.992
ENSMUSG00000010755	913.66	710.572	506.628	416.196	446.818	547.407	913.813	1026.71	715.273	750.958	519.46	792.855	871.766	1167.83	826.782	630.1	789.451	372.141	729.639	635.555	794.037	587.802	782.436	506.249	717.366	597.025	792.232	699.383	418.59	921.339	567.883	1081.88	786.09
ENSMUSG00000010760	0	0	0	0.994274	0	0	0	0	0	0	0	0	0	0	0	0	0	0	0	0	0	0	0	0	0	0	0	0	0	0	0	0	0
ENSMUSG00000010796	0	0	0	0	0	0	0	0	0	0	0	0	0	0	0	0	0	0	0	0	0	0	0	0	0	0	0	0	0	0	0	0	0
ENSMUSG00000010797	1.97227	0.954313	1.00854	5.96563	3.02552	0.987288	2.97774	2.82829	4.84023	2.80869	0.9962	0	3.00098	3.9357	3.06072	2.0186	2.00713	7.07215	6.03029	3.99532	4.99879	1.97726	1.97382	6.91859	0	12.7865	3.0329	1.96882	2.98807	0.978761	0.994968	0	0
ENSMUSG00000010803	0	0	0	0	0	0	0	0	0	0	0	0	0	0	0	0	0	0	0	0	0	0	0	0	0	0	0	0	0	0	0	0	0
ENSMUSG00000010825	0	0	0	0	0	0	0	0	0	0	0	0	0	0	0	0	0	0	0	0	0	0	0	0	0	0	0	0	0	0	0	0	0
ENSMUSG00000010830	26.6255	19.0865	21.1796	36.7882	44.3746	37.5165	34.74	32.9965	43.5623	48.6842	21.9162	43.9852	25.0084	41.3245	27.5465	24.2232	37.1319	47.4845	47.2374	38.9547	27.9931	35.591	21.7119	46.4535	40.073	40.3266	32.3508	25.5947	22.9086	33.2773	21.8897	45.2281	40.3958
ENSMUSG00000010841	0	0	0	0	0	0	0	0	0	0	0	0	0	0	0	0	0	0	0	0	0	0	0	0	0	0	0	0	0	0	0	0	0
ENSMUSG00000010911	241.241	174.99	262.897	244.589	285.773	202.406	198.044	137.43	171.668	186.1	138.459	267.749	260.4	186.499	254.098	189.623	274.222	240.198	396.458	252.637	277.484	249.417	268.772	174.017	138.613	177.737	265.395	190.128	151.983	243.269	212.903	199.398	247.377
ENSMUSG00000010914	449.634	361.764	340.958	224.425	243.207	306.853	432.604	365.465	352.723	384.99	365.248	540.039	496.435	471.779	386.741	429.12	485.684	332.757	501.92	374.286	472.041	346.842	361.654	219.838	379.066	493.96	411.493	391.02	209.332	533.172	504.824	452.474	413.713
ENSMUSG00000010936	1301.38	1070.62	911.508	744.4	727.371	991.468	1139.11	1133.31	1010.48	636.105	940.816	1226.06	1086.45	1223.64	843.32	898.888	1074.78	719.627	998.338	935.573	1138.79	881.162	1092.45	782.072	1247.82	1017.72	1056.6	1063.2	873.149	1182.55	964.569	1173.48	986.975
ENSMUSG00000011008	1050.05	900.943	938.977	643.253	845.737	919.363	1077.33	1293.46	964.785	1089.19	905.418	1181.98	1148.5	1201.03	921.25	885	1087.76	840.253	1024.62	1164.85	1070.2	683.709	773.942	684.303	1298.87	949.818	1070.23	782.808	725.736	981.636	1132.05	650.721	869.979
ENSMUSG00000011034	0.986103	0	0	0	1.00855	0	0	0.942767	0	0	0	0	0	0	0	1.00931	0	0	0	0	0	0	0	0	0	0.983545	0	0	0	0	0	0	0
ENSMUSG00000011052	0	0	0	0.994276	0	0	0	0	0	0	0	0	0	0	0	0	0	0	0	0	0	0	0	0	0	0	0	0	0	0	0	0	0
ENSMUSG00000011096	205.365	365.612	183.633	256.732	338.618	310.587	305.672	290.969	421.965	311.526	443.672	320.242	179.111	429.247	331.809	511.697	395.018	241.601	287.392	424.648	328.28	469.237	316.129	393.04	362.696	386.439	350.274	335.877	269.516	403.704	311.016	410.547	239.36
ENSMUSG00000011114	675.351	554.861	572.166	865.022	861.019	867.455	632.75	638.796	890.886	816.777	608.794	762.426	716.541	686.25	686.178	598.6	759.421	922.775	707.965	890.853	730.367	896.872	630.843	786.038	722.278	840.769	659.372	578.076	912.459	655.129	608.662	649.866	650.381
ENSMUSG00000011118	0	0	0	0	0	0	0	0	0	0	0	0	0	0	0	0	0	0	0	0	0	0	0	0	0	0	0	0	0	0	0	0	0
ENSMUSG00000011148	204.264	138.691	98.5621	170.625	170.219	182.491	167.065	138.922	235.586	155.73	115.176	134.416	195.95	126.942	118.661	145.805	125.315	116.305	145.319	230.58	187.966	211.03	200.625	118.719	239.965	143.54	169.528	147.31	162.533	169.829	105.332	145.873	163.462
ENSMUSG00000011154	0	0	0	0	0.945338	0	0	0	1.15618	0	0	0	0	0	0	0	1.19859	3.95281	0	0	2.04531	2.94822	0	0.917707	1.99955	1.17471	0	0	0	0	0.921973	0	0
ENSMUSG00000011158	1117.75	966.533	786.18	1125	1282.13	1248.1	1038.58	1213.65	1196.92	676.352	970.959	1127.27	995.46	1253.26	862.591	976.995	947.182	1280.31	925.954	1096.45	980.243	1223.45	864.815	895.962	1218.82	1365.92	819.441	1005.22	1220.55	1226.61	1014.71	1060.15	1011
ENSMUSG00000011171	5.39341	0	1.57601	18.5982	5.51582	3.08551	27.5147	0.736584	3.78176	1.4583	0.778353	12.6398	1.56316	1.53263	0.797105	12.7616	1.56823	9.56834	1.57052	4.68244	1.55733	3.08981	1.53726	0.772258	17.5546	4.61093	2.36967	2.30742	3.89106	0.764696	1.55481	11.2926	0.789041
ENSMUSG00000011179	5433.19	4089.99	4901.2	1421.5	2014.51	3223.51	6594.51	4942.95	3482.39	6129.04	4561.33	6749.33	6600.74	5764.49	5247.37	4632.9	6903.98	1439.91	6574.39	4308.02	6615.25	3139.38	4879.77	2234.87	6168.82	3732.4	5737.9	5056.93	1830.92	6445.62	5902.87	5041.11	4957.35
ENSMUSG00000011254	717.695	547.227	384.019	129.955	187.198	289.163	567.607	776.098	416.42	834.456	550.351	651.593	665.99	547.844	547.726	537.03	704.08	118.812	590.207	483.624	676.335	400.867	520.653	172.337	634.378	394.269	512.028	530.602	200.662	740.842	591.661	916.172	527.069
ENSMUSG00000011256	732.563	1269.76	851.005	1297.22	1412.03	1454.03	743.779	1120.34	1514.21	450.996	1088.57	1103.61	1135.57	772.287	860.488	980.879	791.922	1246.55	866.922	1402.27	1273.48	1427.51	1173.96	1069.66	820.041	1545.44	899.137	1251.6	1391.27	841.569	1112.18	1264.12	1137.55
ENSMUSG00000011257	5386.71	4597.69	4072.4	1373.81	2248.03	2799.09	4602.91	4568.04	3642.95	3033.12	4781.1	5546.07	4489.34	5623.44	4797.31	4591.33	4981.67	1186.92	4634.63	3815.35	5349.09	2889.8	4826.56	1656.86	4494.27	2951.63	5297.49	4753.25	1697.84	4760.03	4711.91	4925.68	4821.33
ENSMUSG00000011263	51.1831	42.8359	31.8566	46.1167	82.3593	66.5014	66.0758	34.4802	97.2484	14.0079	32.2942	60.6915	39.0547	72.1745	27.5528	59.7782	54.303	80.2978	27.5689	97.8706	47.6867	86.7574	42.5261	50.1704	26.9509	83.2308	32.7731	50.0493	53.1226	32.5421	31.4281	61.1226	51.7927
ENSMUSG00000011267	236.245	222.636	145.577	136.677	147.362	160.303	184.914	207.064	185.674	171.522	176.751	199.389	165.784	215.467	149.87	167.18	162.499	134.58	158.307	208.151	155.84	187.395	209.981	120.77	236.19	160.069	182.875	244.106	150.594	185.68	139.736	206.872	133.446
ENSMUSG00000011305	21.6948	9.54332	15.1283	12.9255	14.1192	5.92368	3.97032	15.0841	8.71244	1.87245	0.996156	2.99899	3.00102	8.85525	5.10123	8.07437	6.02142	27.2784	7.03538	4.99416	5.99852	15.8182	8.88218	3.95347	8.79651	27.5401	2.02192	5.90645	1.99206	6.8512	10.9448	6.59579	16.1583
ENSMUSG00000011306	669.338	595.527	467.569	538.286	601.31	593.367	561.784	650.31	698.777	389.031	554.447	637.892	612.232	699.772	553.096	578.187	549.561	617.582	556.583	659.835	574.637	628.794	562.679	435.769	544.721	696.244	547.261	564.404	589.843	582.722	582.588	601.284	582.879
ENSMUSG00000011349	0	0	0	0	0	0	0	0	0	0	0	0	0	0	0	0	0	0	0	0	0	0	0	0	0	0	0	0	0	0	0	0	0
ENSMUSG00000011350	0	0	0	0	0	0	0	0	0	0	0	0	0	0	0	0	0	0	0	0	0	0	0	0	0	0	0	0	0	0	0	0	0
ENSMUSG00000011382	241.489	179.983	147.649	281.825	235.545	185.853	187.392	170.98	204.945	130.312	148.751	161.877	170.528	265.712	131.424	193.01	163.589	410.185	192.323	224.279	198.904	241.272	210.568	149.028	195.618	305.326	118.879	218.762	146.239	222.949	171.298	182.462	209.593
ENSMUSG00000011427	191.704	179.234	197.702	262.946	210.939	255.638	191.061	211.495	237.485	100.959	197.15	395.931	175.369	329.33	138.4	232.527	233.149	371.372	229.134	325.241	198.351	368.489	257.744	231.947	146.485	217.439	130.303	214.157	188.916	224.326	180.384	220.189	167.146
ENSMUSG00000011463	0	0	0	0	0	0	0	0	0	0	0	0	0	0	0	0	0	0	0	0	0	0	0	0	0	0	0	0	0	0	0	0	0
ENSMUSG00000011486	0	0	0	0	0	0	0	0	0	0	0	0	0	0	0	0	0	0	0	0	0	0	0	0	0	0	0	0	0	0	0	0	0
ENSMUSG00000011589	0	0.514394	0	0	0	0	0	0	0.521787	0	0.536963	0	0	0	0	0.544028	0.540928	0	0	0	0	0.532895	0	1.0655	0	13.7529	29.4217	0	0	0	0	0	0
ENSMUSG00000011632	39.4451	27.6755	5.04276	0	2.01703	0.987269	17.8663	23.5689	0.968047	38.3856	10.9581	10.9963	14.0047	31.4854	9.18216	10.093	20.0713	2.02062	10.0505	2.99652	22.9944	1.97728	16.7774	1.97675	35.1861	1.96715	9.09866	18.7038	0.996029	22.5111	7.95989	21.6718	13.1286
ENSMUSG00000011658	119.905	124.889	150.231	379.678	418.861	320.272	122.949	124.863	339.354	90.1804	172.539	146.499	141.751	72.2804	99.1861	162.602	135.174	368.195	162.903	301.072	115.306	436.694	100.59	211.199	40.0418	284.684	123.381	115.74	284.182	92.2055	105.191	81.5646	71.8982
ENSMUSG00000011751	4.13109	19.3298	5.2813	3.1239	7.39355	5.16987	2.74349	5.92415	8.28241	3.92201	2.20014	4.18778	1.04763	2.0609	5.45944	4.30547	3.88287	9.54752	3.1578	9.43678	2.20803	10.354	0	11.4107	3.07087	25.0728	5.29387	2.06195	9.41776	1.02504	21.1953	3.94724	6.34593
ENSMUSG00000011752	4676.18	3568.42	3484.15	1269.26	1948.45	2473.01	4245.91	3892.78	2858.06	3833.81	3623.37	5373.13	5447.83	4789.37	4804.76	3771.42	5352.17	1629.41	5096.63	3652.37	5442.65	2518.46	3681.47	1660.74	4603.65	3013.96	4481.8	3573.2	1561.93	5269.44	4422.19	4049.74	4024.54
ENSMUSG00000011831	629.416	458.354	254.62	304.081	255.69	450.248	542.294	224.861	314.288	248.396	280.981	485.258	426.063	543.196	254.366	244.841	440.639	349.094	472.074	305.958	458.003	327.388	420.953	386.138	433.992	512.56	233.03	410.935	290.181	331.635	456.155	352.528	215.576
ENSMUSG00000011832	80.8415	77.6114	104.941	252.249	164.99	206.667	75.7075	86.1812	290.831	37.628	85.1358	67.1809	60.053	85.3019	40.8128	57.9854	128.513	311.931	51.3499	154.54	91.1931	270.722	78.3129	123.808	43.3921	153.433	78.1436	63.4773	159.187	89.077	67.2741	67.0555	59.4918
ENSMUSG00000011837	238.066	214.259	213.375	193.855	216.773	254.777	236.279	224.153	275.427	170.196	227.149	271.216	261.359	227.432	235.884	277.421	235.054	190.012	299.575	267.63	227.561	251.817	198.343	103.179	278.213	235.986	277.471	273.885	214.216	307.956	226.915	253.35	213.504
ENSMUSG00000011877	1758.72	1329.19	1229.09	842.982	873.238	1225.65	1519.3	1554.43	1212.67	711.061	1149.56	1416.61	1340.87	1953.05	1053.23	1285.59	1291.72	876.334	1144.91	1370.45	1458.98	1125.67	1194.16	849.717	1604.45	1209.56	1203.9	1322.43	1215.55	1792.23	1276.95	1659.61	1214.95
ENSMUSG00000011884	870.045	840.981	682.337	1434.47	1394.05	1223.88	930.066	723.975	1385.43	579.414	772.141	906.14	771.81	826.656	625.926	851.361	840.39	1438.92	882.602	1394.51	841.604	1642.56	800.371	1212.24	778.614	1323.04	776.256	788.29	1732.47	817.561	722.469	941.773	771.343
ENSMUSG00000011958	1445.77	1042.42	1004.27	1279.13	1137.42	1347.14	1261.44	1285.09	1221.17	1152.34	1270.67	1766.73	1627.86	1458.14	1204.41	1320.21	1438.48	1603.55	1556.32	1315.68	1423.83	1284.76	1147.75	1190.6	1154.22	1301.38	1198.16	1195.84	1346.51	1331.69	1403.15	1283.53	1301.65
ENSMUSG00000011960	1316.48	1407.14	1081.5	1243.07	1172.72	1398.59	1658.67	1150	1196.94	646.624	1448.25	1980.07	1641.21	1634.16	1188.71	1467.65	1630.2	1417.34	1347.62	1694.02	1750.01	1569.87	1339.87	1151.64	1535.88	1787.28	1118.37	1056.78	1306.46	1682.04	1477.6	1376.37	1419.36
ENSMUSG00000012017	20.3816	52.9758	44.1923	195.602	152.641	153.547	76.3578	61.7789	165.98	13.2266	23.2396	75.7384	14.3495	71.7261	18.8355	42.7095	69.2403	160.499	27.9251	129.263	42.1989	131.561	43.1603	101.511	92.4349	118.936	13.5816	37.4001	119.808	15.1717	42.0808	50.6552	77.6585
ENSMUSG00000012042	0	0	0	0	1.00851	0	0	0	0	0	0	0	0	0	0	0	0	0	0	0	0	0	0	0	0	0	0	0	0	0	0	0	0
ENSMUSG00000012076	410.481	474.123	258.783	233.417	229.616	319.988	337.982	472.721	374.818	418.686	358.506	324.611	427.623	447.309	344.035	357.675	343.015	236.288	361.589	565.548	381.406	351.683	364.685	278.726	274.447	386.838	292.578	307.093	259.298	491.464	362.104	413.565	403.896
ENSMUSG00000012114	1355.89	890.396	850.544	995.516	1049.24	1405.75	1070.12	906.304	999.745	634.192	759.261	939.599	842.894	1351.27	670.432	938.84	745.274	998.981	703.683	1092.2	777.249	1028.14	948.318	1129.91	1478.54	1202.97	756.392	1005.32	1355.85	1077.13	921.468	1135.5	853.897
ENSMUSG00000012117	733.239	695.51	647.937	403.805	472.882	878.045	630.097	669.074	789.918	646.364	676.798	774.87	723.279	721.309	701.727	570.49	625.456	501.069	581.162	654.218	786.227	641.482	828.403	430.072	531.357	653.149	849.918	712.599	480.912	840.301	840.82	798.462	729.594
ENSMUSG00000012123	64.4568	17.6384	30.7269	15.9029	51.0338	56.3171	9.28171	50.1586	91.0656	131.983	42.6781	55.323	41.8759	48.8756	59.3464	57.0994	46.6249	42.6238	20.2197	112.617	9.62038	41.7245	44.2236	27.631	55.6285	63.0315	57.5785	67.6856	97.5431	22.0686	19.9644	32.3743	65.6668
ENSMUSG00000012126	104.637	141.262	139.179	244.69	294.269	320.007	206.715	81.9378	271.042	62.5156	179.563	205.954	102.169	170.076	188.076	205.295	149.186	219.687	142.331	226.291	102.396	408.002	99.2193	193.956	118.144	284.955	123.18	164.436	252.198	199.006	153.134	117.635	125.266
ENSMUSG00000012187	0	3.9307	5.95605	17.4563	31.2794	4.53475	1.10613	1.05061	19.8211	0.614319	7.47164	5.28786	2.22958	1.09051	4.01672	1.32454	2.23678	75.8938	2.22787	6.55409	1.31203	10.3795	1.09982	8.43104	1.924	27.3012	14.8469	0	10.4689	5.17125	0	4.17731	5.30132
ENSMUSG00000012211	0	0	0	5.2209	0	1.69545	4.35968	0	0	0	0.85538	0.858365	0	0	0.876029	0.866634	0	0	0.862992	0.857651	0.858436	0.848888	0	0	0	4.32017	0.868058	0	0.855234	0.463597	0	0.809062	0.867149
ENSMUSG00000012282	0	0	0	0	0	0	0	0	0	0	0	0	0	0	0	1.0093	0	0	0	0	0	0	0	0	0	0	0	0	0.996021	0	0	0	0
ENSMUSG00000012296	352.656	393.097	405.951	206.059	261.635	383.252	396.096	501.112	458.11	409.843	430.88	531.002	435.242	519.729	406.744	434.193	387.623	259.435	499.947	402.313	501.358	400.817	439.228	148.77	556.7	353.414	562.484	353.38	293.619	440.502	302.075	565.224	484.503
ENSMUSG00000012350	12.3507	50.8597	19.5215	242.632	137.842	202.918	86.6506	62.8309	205.465	23.7572	45.5339	57.8817	37.7679	16.244	26.7938	46.6332	35.9088	259.933	18.3094	201.85	36.9202	206.916	56.6987	213.581	12.2413	185.955	32.3308	41.3912	211.276	41.7969	50.3738	40.4547	64.754
ENSMUSG00000012396	2.95868	1.90888	4.09868	5.96775	3.08473	0.987338	1.8976	0.947589	2.99276	0.936323	1.01196	4.14237	0	3.93973	2.04068	6.05666	2.00793	3.07438	5.02623	3.99555	2.99972	4.9437	1.97395	2.96572	5.30874	4.18765	2.02485	5.06781	4.16461	5.09046	0	0	3.15289
ENSMUSG00000012405	7931.35	6950.76	5145.33	3254.36	4695.91	4829.73	6436.16	7077.28	5893.74	12697.4	6705.74	8941.67	8451.04	7454.45	8684.03	6946.75	9227.16	3907.53	9045.08	6829.86	8640.28	5309.35	6378.03	3285.28	7400.54	5044.01	7775.89	6824.17	3817.97	7787.59	6148.35	7130.12	6977.02
ENSMUSG00000012422	1049.11	839.7	886.117	662.695	850.235	913.015	1067.91	805.379	728.496	1565.67	876.575	1310.86	1482.07	1113.73	1228.52	1005.02	1290.57	1021.06	1278.83	994.89	1340.73	980.883	953.928	672.348	1227.46	1009.79	1107.56	942.624	803.348	1135.12	1151.66	888.342	946.353
ENSMUSG00000012428	270.199	249.079	415.524	1300.51	1383.68	829.312	524.078	309.224	1043.56	190.056	398.476	577.805	474.16	400.454	388.712	466.296	486.729	2015.56	553.784	949.894	526.871	1156.71	316.797	1209.77	471.102	1895.35	345.749	262.838	889.45	228.047	391.029	352.402	520.096
ENSMUSG00000012429	373.928	283.668	381.851	239.427	299.147	327.929	367.194	249.675	309.917	218.931	360.832	520.029	593.824	313.412	459.335	472.552	487.668	258.313	577.853	353.106	520.745	317.526	330.043	234.304	197.754	345.543	459.514	366.443	251.953	443.87	441.942	285.006	407.637
ENSMUSG00000012443	3499.67	3364	3005.5	449.408	742.255	2058.47	3874	3504.23	2025.28	2337.78	3448.77	5407.18	5495.18	3554.28	3459.12	3274.71	4522.06	212.191	4410.25	2204.61	4910.79	1362.47	3940.71	948.808	3697.47	2056.65	4079.51	4219.15	802.97	4202.72	4752.04	3635.62	3592.19
ENSMUSG00000012483	297.342	276.423	264.99	142.171	233.086	228.087	279.137	264.926	244.599	543.834	299.361	447.457	524.225	315.427	483.457	329.723	457.226	110.802	425.79	341.702	476.369	231.184	327.42	166.824	291.643	243.967	426.714	344.518	142.953	337.338	411.441	280.126	342.007
ENSMUSG00000012519	68.1501	58.0958	85.4665	113.991	63.1099	115.097	62.7661	71.3996	65.4589	48.114	47.8836	90.1151	80.2313	71.4389	40.7278	101.413	56.9723	132.317	78.6987	101.398	61.806	92.9825	37.789	102.889	105.533	151.054	55.6074	33.6836	112.381	33.4896	41.3408	40.5589	55.9471
ENSMUSG00000012520	0	0	0	0	0	0	0	0	0	0	0	0	0	0	0	0	0	0	0	0	0	0	0	0	0	0	0	0	0	0	0	0	0
ENSMUSG00000012535	2701.04	2230.92	1555.75	1287.47	1503.39	1712.53	2116.03	2577.67	1951.88	1291.42	1893.5	2773.68	2698.31	2961.43	1718.37	1969.76	2381.58	1354.94	2277.13	2284.64	2645.52	2009.99	1996.16	1034.48	2434.07	2408.45	2089.66	2545.22	1489.97	2439.68	2607.33	2665.34	1861.5
ENSMUSG00000012609	516.39	356.438	216.449	265.131	294.475	330.373	503.594	383.79	351.374	104.698	286.18	403.258	434.865	311.521	237.788	350.953	274.79	227.063	326.09	305.118	346.244	297.612	369.4	260.858	234.121	367.677	238.361	451.391	183.889	376.627	416.806	558.149	338.94
ENSMUSG00000012640	491.371	508.856	487.015	606.327	569.682	576.012	333.397	490.489	420.381	621.315	390.901	409.102	468.425	395.153	212.293	309.778	363.958	583.221	601.3	593.56	613.441	657.729	216.94	470.163	514.155	613.843	338.954	378.138	372.007	471.97	504.737	595.732	445.48
ENSMUSG00000012705	96.5524	89.5816	214.637	648.096	628.255	267.775	60.7802	115.943	402.849	150.375	92.4039	131.46	162.198	96.3263	202.293	192.454	102.756	1503.16	299.83	354.521	209.668	551.331	155.846	196.91	72.9234	713.688	112.649	83.5784	158.892	74.202	127.323	120.061	298.053
ENSMUSG00000012777	0	0	0	0	0	0	0	0	0	0	0	0	0	0	0	0	0	0	0	0	0	0	0	0	0	0	0	0	0	0	0	0	0
ENSMUSG00000012819	0	1.53976	1.6683	13.9366	17.0467	38.3146	4.37009	2.07945	10.1429	7.96929	16.9774	1.61285	13.8198	3.17536	7.11232	3.17514	0	29.0601	4.93957	11.2679	9.96069	13.4288	1.08835	46.7282	6.41947	9.93713	1.11477	1.58169	34.3949	2.33217	5.09264	1.94371	5.55052
ENSMUSG00000012848	23938.2	21765.8	17014.6	10317.2	14858.1	14684.1	17080.3	22325.3	17816.3	39664.3	18045.2	21282	21742.6	22811.7	23455.7	18855.4	23740.4	11769.1	22496.1	19552.7	22201.4	16090.7	18737.3	9931.95	24186.8	14105.8	20727.9	19205.6	12710.9	22439.1	18374.3	23398.4	19407.5
ENSMUSG00000012889	6.52772	18.0493	19.0748	121.758	154.105	72.3573	19.4639	1.78303	98.9569	4.42677	21.866	18.2006	8.51372	11.1653	12.9716	34.932	8.54124	143.662	14.2616	76.8814	12.2705	120.887	13.1741	88.3697	5.0033	102.492	12.6939	12.1018	139.642	7.02123	16.9364	12.4747	17.1902
ENSMUSG00000013033	786.076	1106.31	795.79	886.102	659.998	969.516	849.654	887.805	1005.2	373.938	978.385	1006.17	817.079	1242.52	514.556	1153.15	548.701	655.502	697.304	839.902	714.374	839.335	1307.53	584.117	751.102	1132.23	583.162	968.945	1004.22	793.213	831.034	1228.12	744.939
ENSMUSG00000013076	144.061	156.075	131.584	599.745	441.995	341.977	172.362	287.459	344.212	73.1174	170.244	232.726	151.652	207.923	104.05	189.176	129.089	604.299	158.831	319.368	259.794	430.913	173.191	359.931	217.032	557.948	142.116	191.359	357.062	172.587	265.088	205.322	190.024
ENSMUSG00000013083	12.4383	3.67049	6.48487	0	2.18255	1.62737	12.9516	8.33403	6.43492	16.1389	3.8315	3.50591	8.52951	4.33518	13.397	8.79941	12.6582	2.18643	8.76239	3.84168	10.8128	6.41861	10.8747	0.543061	12.5052	10.4786	15.4129	12.5951	2.18906	8.03254	12.9775	3.10632	8.28821
ENSMUSG00000013089	123.679	158.886	105.929	414.277	234.238	233.471	451.863	520.513	240.57	215.723	286.901	143.805	276.09	351.865	219.135	118.799	252.315	375.027	152.696	153.052	264.643	376.896	156.799	164.736	297.109	319.899	228.323	164.198	449.225	281.722	313.19	168.642	185.144
ENSMUSG00000013091	0	0	0	0	0	0	0	0	0	0	0	0	0	0	0	0	1.00356	1.01031	0	0	0	0	0	0	0	0	0	0	0	0	0	0	0
ENSMUSG00000013150	73.0185	74.0896	58.9748	61.3462	110.464	109.096	86.3789	56.7557	101.143	57.8269	60.4586	123.06	55.0524	122.288	36.6862	80.604	73.4023	100.41	67.2712	111.121	41.1963	62.6894	43.2189	89.8944	20.5013	108.456	36.9738	84.9294	132.875	47.8811	21.536	81.289	80.6775
ENSMUSG00000013155	170.321	167.443	230.699	42.6909	107.543	125.698	145.124	170.132	143.739	164.757	274.065	251.42	261.031	219.397	303.689	308.15	289.04	39.8945	308.91	171.202	328.665	121.638	194.37	74.6376	175.516	108.3	259.395	205.485	57.7767	197.582	263.036	227.508	320.746
ENSMUSG00000013158	2.05541	0	0.808135	0	0	0	0.795341	0	0	0.750189	0	0	0	1.5768	0	2.10371	0	0	0	0	0.801094	2.06066	0	0	0	0	0.810073	0	0.701337	0.784251	0	0	0
ENSMUSG00000013160	761.091	685.332	620.185	908.469	953.106	999.332	773.575	773.553	1048.9	655.163	610.332	847.221	759.427	610.267	675.7	753.466	843.746	1181.74	825.873	1080.71	781.533	993.325	596.662	830.039	784.179	1072.76	708.33	614.755	944.113	723.485	602.999	787.215	677.327
ENSMUSG00000013236	3133.5	3265.41	1202.17	633.782	1521.59	1627.98	2048.09	2786.95	1985.24	1372.77	2162.39	1783.55	1902.27	2729.78	1357.12	2199.98	1440.24	672.89	1477.87	1846.91	1803.55	1199.8	2676.56	949.52	2429.77	2224.64	1806.52	2789.25	994.595	3362.42	1946.41	3013.05	2093.37
ENSMUSG00000013275	681.627	489.914	388.702	802.962	578.839	1007.39	311.545	484.074	535.879	136.314	615.704	699.532	478.755	525.052	235.88	447.484	295.17	515.215	544.782	474.287	298.439	714.675	364.599	552.69	367.42	847.313	610.141	261.448	694.083	305.056	277.359	611.648	338.41
ENSMUSG00000013338	0	0	0	0	1.29724	0	0	0	0	0	0	0	0	0	0	0	0	0.788459	0	0	0	0	0	0	0	0	0	0	0	0	0	0	0
ENSMUSG00000013353	0	0	1.00852	0	0	0	0	0	0	0	0	0	0	0	1.02459	0	0	1.01028	0	0	0.996998	0	0.986886	0	0	0	0	0	0	0	0.99497	0	0
ENSMUSG00000013367	1.8123	2.63076	2.78022	16.4451	18.534	5.4431	2.73616	1.73258	11.5638	0.860247	3.66149	0.918592	0.919194	0.904097	0.937468	7.68234	2.76645	22.8794	2.77053	5.50684	4.59329	16.3214	1.81368	13.6229	1.79618	10.8455	0.928935	0	6.40659	0	4.22918	2.59748	0
ENSMUSG00000013415	0	0	0	0.254805	0	0.253038	0	0	0	0	0	0	0	0	0	0	0	0	0	0	2.42476	0	2.38151	0	0	0	0	0	0	2.37379	2.4132	0	0
ENSMUSG00000013418	0.986109	0.954345	0	2.98281	3.02555	1.97457	5.95544	1.8855	3.87219	4.68115	1.99239	0	2.00066	0	1.02025	4.0372	0	7.07215	2.0101	6.99184	0	3.95456	0	12.8488	0	10.8194	3.03288	0	2.98806	0	1.98999	1.8845	1.00989
ENSMUSG00000013419	23.4563	34.74	30.0034	116.418	99.1586	67.7176	29.1819	53.5228	82.7395	12.5269	26.2857	30.9321	28.0173	44.0164	33.0622	30.4815	23.3279	132.26	47.2549	86.2953	25.4215	124.03	30.8146	85.0025	27.6748	101.656	10.9826	21.0444	102.246	28.4527	20.0178	35.0255	24.0969
ENSMUSG00000013465	1264.91	948.39	1035.71	1030.51	1264.51	1399.77	976.432	1091.69	1181.92	807.704	991.315	1359.11	1254.59	1250.71	1048.49	976.326	1229.56	1418.44	1060.19	1270.02	1203.73	1229.52	1096.95	990.941	1047.89	1421.18	929.009	1014.69	1156.84	1097.25	976.997	1249.44	1093.75
ENSMUSG00000013483	1.61562	1.06963	1.76287	3.25799	2.26079	1.10661	0	0	2.53812	1.04935	0	0.873718	1.74847	2.20568	0	1.1313	1.12481	4.41483	1.12648	4.47824	1.12061	4.43247	0	2.21568	0	6.87687	0	0	2.23278	0.855423	1.11525	1.0561	2.48186
ENSMUSG00000013495	307.592	224.669	222.927	348.65	354.07	325.787	340.491	207.359	365.053	186.162	249.154	240.931	238.68	319.156	192.677	282.867	220.791	339.092	241.583	369.827	264.206	378.663	277.5	328.28	221.294	399.46	221.588	275.157	321.083	248.204	290.429	295.709	232.577
ENSMUSG00000013523	16.5508	38.4782	14.9644	39.8008	82.0494	27.029	16.5406	4.2935	36.1427	22.4003	25.5016	45.124	27.1507	5.47672	64.2073	31.0482	24.6804	55.2562	20.8744	21.1216	39.6857	39.9489	19.4236	23.9425	2.47291	63.3937	47.8551	6.97386	17.0347	22.3533	30.8204	32.8222	13.2867
ENSMUSG00000013539	237.176	191.958	144.99	242.299	236.53	235.492	186.12	196.743	276.943	240.193	200.121	238.422	223.271	188.511	196.295	175.982	211.853	242.266	191.521	204.173	202.702	288.134	150.953	226.182	192.271	332.266	147.705	223.797	305.534	151.62	235.941	194.218	104.782
ENSMUSG00000013562	0	0.954327	0	0.994273	0	0	0	0	0.968056	0	0	0	0	0	0	0	0	0	0	0	0	0.988636	0	0.988374	0	0	0	0	0	0	0	0	0
ENSMUSG00000013584	8.87516	4.77165	16.1369	38.7767	32.2724	20.7328	1.98515	1.88553	17.4249	3.74495	5.97715	14.995	12.004	2.95176	12.2429	8.07436	15.0534	45.4639	9.04546	24.9709	14.9963	16.8069	5.92141	39.5349	7.8191	26.5566	16.1754	7.8753	48.8052	8.80867	11.9398	5.65352	11.1088
ENSMUSG00000013593	2135.71	2087.66	2234.02	1400.07	1883.21	1705.97	1981.66	2148.45	2245.95	2156.4	2460.99	2901.86	3038.34	2177.48	3009.83	2605.24	2556.09	1879.42	2754.07	2359.85	2785.87	2085.64	1955.39	1219.25	2145.53	1984.08	2698.64	1981.9	1395.36	2274.04	2336.97	2403.82	2713.65
ENSMUSG00000013611	0	0	0	0	0	4.01919	1.01022	0	0.985213	0	1.01389	0	0	0	0	0	0	0	0	0	0	2.01237	1.00443	0	0	1.00103	0	0	0	0	0	1.64206	1.02782
ENSMUSG00000013622	441.757	414.736	318.926	454.589	662.85	438.88	418.578	515.142	566.656	741.282	256.937	370.377	457.618	463.622	406.391	385.371	441.713	722.815	440.847	525.558	377.76	559.525	354.421	342.223	459.274	592.189	355.537	368.108	465.285	407.323	345.836	443.776	356.553
ENSMUSG00000013629	5493.89	4539.33	3671.68	1146.53	1014.06	3267.91	5720.08	5088.33	3652.32	1785.53	4457.36	4223.31	4913.23	5257.01	3297.03	3654.74	3354.66	739.804	3672.44	2834.75	4743.74	2680.15	5755.27	1387.43	5407.58	3160.79	4394.12	5502.82	1561.39	4662.82	4558.51	4853.41	4516.03
ENSMUSG00000013643	0	0	0	0	0	0	0	0	0	0	0	0	0	0	0	0	0	0	0	0	0	0	0	0	0	0	0	0	0	0	0	0	0
ENSMUSG00000013646	422.577	405.339	236.046	438.887	222.607	459.794	410.528	381.801	354.997	210.356	308.77	413.496	348.144	452.423	285.816	258.234	151.978	344.809	367.494	477.152	357.054	574.147	486.298	381.007	200.545	371.049	325.836	148.124	428.095	388.223	352.785	684.146	367.457
ENSMUSG00000013653	0	0	0	0.994272	1.00851	0.987276	0	0	0.96805	0	0	0.999669	0	0	1.02024	0	0	2.02061	1.00505	0.99884	0	0	0.986902	0	0	0.983568	0	0	0.996018	0	0	0.942249	1.00989
ENSMUSG00000013662	1880.55	1480.16	1410.97	977.372	1135.59	1485.85	1836.26	1614	1258.47	1408.1	1718.43	2413.19	2629.89	1989.48	1703.8	1707.73	2206.84	1219.44	2024.18	1601.14	2291.44	1354.44	1637.28	1004.19	2277.32	1551.1	1888.48	1662.67	1028.89	1813.61	2153.15	1331.4	1747.12
ENSMUSG00000013663	2548.78	2166.9	1737.42	2690.5	2593.81	2676.84	3104.57	2662.33	2543.98	1785.43	2110.66	3160.65	3016.93	2832.4	1907.01	2418.95	2624.87	3451.27	2593.63	2895.8	2663.16	2903.35	2174.14	2229.37	3127.27	3115.49	2377.29	2569.99	2665.06	2860.55	2523.53	2155.16	2508.02
ENSMUSG00000013668	0	0	0	0	0	0	0	0	0	0	0	0	0	0	0	0	0	0	0	0	0	0	0	0	0	0	0	0	0	0	0	0	0
ENSMUSG00000013698	396.213	376.947	507.323	1494.67	1330.44	1151.22	684.048	416.471	1142.49	302.65	539.971	683.369	482.926	500.347	401.278	613.406	671.811	1680.77	594.427	1212.99	479.673	1327.88	398.805	1275.25	358.576	1392.04	464.154	364.894	1488.93	385.457	466.406	460.136	511.131
ENSMUSG00000013701	1496.1	1704.86	1216.57	525.778	919.18	890.809	1369.88	1609.03	1368.52	3914.33	1365.23	1755.52	1599.8	1519.72	1590.55	1548.67	1783.26	528.04	1707.76	1429.97	1703.49	1531.74	1281.45	633.222	1463.66	1093.24	1306.26	1148.8	658.516	1603.92	1376.46	1808.17	1361.76
ENSMUSG00000013707	376.701	354.055	315.677	687.044	737.223	559.785	382.14	308.282	606	433.477	357.632	341.885	324.109	363.066	326.477	353.254	388.379	824.411	412.071	626.271	339.917	747.411	264.491	543.604	338.177	620.637	357.881	275.635	754.987	290.687	306.455	378.785	336.295
ENSMUSG00000013736	1342.02	1269.14	948.779	610.585	797.626	1068.04	1214.01	1421.12	989.681	2269.74	1150.99	1661.79	1689.88	1649.79	1353.83	1237.87	1606.86	515.42	1642.42	1122.02	1498.99	968.585	1285.66	663.958	1414.86	1226.32	1307.76	1094.41	564.659	1440.53	1446.8	1513.94	1134.05
ENSMUSG00000013766	0	0	0	11.1501	0	1.25059	0	0	2.85742	0	0	0	0	0	0	0.717263	0	14.263	0	2.83934	0	0	0	7.72636	0	6.29089	0	0	6.30834	0	0	0	0
ENSMUSG00000013787	2889.66	2584.64	2477.41	2221.95	2679.29	2633.12	2536.9	2939.23	3051.78	1746.17	2843.23	2939.15	2915.73	3200.6	2413.87	2886.36	2627.11	2252.23	2946.2	2993.21	3126.86	2654.37	2522.61	1928.83	3098.17	2993.59	2844.42	2714.94	2354.23	2944.25	2699.45	2923.29	2558.77
ENSMUSG00000013822	802.695	717.427	562.98	331.793	417.764	488.401	592.207	772.145	598.614	1618.38	697.013	862.12	863.657	824.036	899.283	705.406	946.046	320.771	900.559	605.77	892.569	535.419	738.869	328.359	830.874	536.515	721.769	672.337	369.02	807.085	719.71	894.895	715.149
ENSMUSG00000013833	833.328	809.164	584.166	424.734	474.527	606.321	671.888	618.955	600.671	453.417	531.362	695.521	632.642	743.986	509.92	624.345	639.752	380.234	568.148	660.206	583.697	683.96	883.102	429.65	966.698	525.863	605.921	588.919	475.844	802.078	564.46	598.351	548.228
ENSMUSG00000013846	974.14	964.072	599.597	2018.74	2015.99	1704.23	1164.25	1185.69	1682.92	552.868	768.844	878.489	667.704	1226.6	510.716	778.043	950.165	2213.58	687.517	1596.83	855.172	2234.65	831.464	1561.9	1412.36	1792.32	672.781	856.35	2019.46	1031.33	727.611	1241.87	734.425
ENSMUSG00000013858	1609.63	1641.83	1384.97	1358.84	1782.13	1470.46	1262.98	1710.07	1933.97	1441.21	1673.15	1672.16	1283.19	1883.85	1487.84	1738.45	1481.51	1381.8	1473.92	1646.39	1534.32	1775.87	1362.38	1149.98	1848.08	1566.07	1366.19	1515.93	1340.83	1579.09	1235.75	1793.78	1658.61
ENSMUSG00000013878	260.121	140.664	149.301	362.199	303.339	317.515	238.462	184.24	322.85	233.841	269.395	252.147	257.502	300.402	166.994	361.891	258.083	411.688	241.537	335.272	245.344	350.043	241.39	300.682	344.87	399.653	183.609	241.387	287.03	272.987	251.576	137.639	293.978
ENSMUSG00000013921	23.2501	68.1145	46.543	256.619	146.199	113.129	135.41	29.3266	211.892	28.8576	24.6672	115.851	74.3885	84.807	38.3908	92.2239	75.9557	166.144	21.9958	105.126	39.8358	257.872	56.4189	154.938	36.4737	161.74	33.5577	32.3827	191.741	40.5815	15.842	38.7216	44.3927
ENSMUSG00000013928	3.03269	0.926024	0.978641	2.09299	0.978605	0	2.0894	0	3.91647	1.0623	0	2.91007	0.970667	0.954739	0	0	1.94763	5.23379	0.975257	0.969216	0.970126	0	0	4.1611	0.948403	3.02486	0.980984	0	0.966482	0.949735	1.93096	1.06914	0.979964
ENSMUSG00000013936	0	0	0.946131	2.21018	0.946093	1.09731	0	0	1.07594	0	0.934533	0	0	0	0	0	0	1.89555	0.942849	1.11016	0	0	0	1.8544	0	0.922701	0	0	1.10703	0	0.9334	0	0
ENSMUSG00000013973	543.285	609.188	146.818	429.163	530.359	340.047	330.603	323.547	671.217	405.581	702.319	653.448	397.199	581.351	501.364	189.382	411.24	201.35	438.602	563.322	523.074	369.914	400.125	463.035	375.279	459.647	467.831	370.016	505.938	513.345	391.712	514.294	460.256
ENSMUSG00000013974	23.6671	22.9038	36.3079	165.05	161.362	125.384	61.5395	23.5689	140.367	41.1943	49.8095	41.9859	35.0118	24.5979	29.587	45.4184	38.1354	213.175	29.1465	108.873	32.9919	164.114	26.6464	158.139	19.5478	134.75	34.3727	12.7974	182.272	23.4898	51.7392	42.4014	56.5541
ENSMUSG00000013997	274.121	218.723	194.829	400.53	384.566	342.75	238.168	252.087	462.801	246.725	276.461	265.267	260.095	253.555	213.756	280.405	252.912	434.453	322.338	440.063	249.607	441.976	190.482	313.946	207.864	438.552	263.95	254.891	412.885	241.935	249.551	277.341	283.265
ENSMUSG00000014030	5255.62	5929.98	5773.28	4427.27	6662.54	6828.86	5227.28	5288.94	8331.86	2152.87	7398.49	4134.2	4560.89	6459.13	3048.17	4791.58	4377.32	5190.51	3397.11	6462.87	5075.34	6346.2	5750.79	3500.99	6840.22	6724.29	5527.21	4622.23	4964.7	6116.21	4984.88	4424.68	5153.99
ENSMUSG00000014039	579.78	466.066	230.955	344.061	437.285	660.269	425.519	499.158	359.392	241.558	429.319	415.776	304.938	478.331	174.224	392.044	309.252	315.27	398.82	411.862	438.552	497.05	423.748	400.794	258.166	457.826	274.48	315.7	382.949	373.39	413.904	727.427	294.783
ENSMUSG00000014074	709.726	692.599	489.903	441.288	395.895	592.335	754.658	532.046	533.973	730.493	583.699	795.937	839.624	790.099	581.551	592.787	742.371	457.06	827.643	660.665	815.415	544.738	621.882	408.427	652.776	630.236	638.295	747.266	412.023	682.784	771.335	750.414	676.218
ENSMUSG00000014075	46.7735	22.2807	26.8357	47.2542	60.2858	40.795	47.138	13.7974	61.891	47.3631	28.2304	45.0392	47.1312	43.7032	44.759	53.5414	43.5148	67.7987	69.0595	72.3399	37.3304	58.334	24.6803	58.5345	52.5645	60.8616	42.5128	20.3606	48.2144	55.1528	49.0655	27.356	36.4351
ENSMUSG00000014077	1090.59	1068.94	770.538	1377.68	1391.49	1196.21	1316.18	1276.43	1690.31	949.677	1071.17	1310.54	1440.32	1248.24	855.445	1095.56	1263.54	2130.98	1266.98	1469.25	1236.78	1383.79	1089.41	979.387	1195.71	1616.59	1072	1023.2	1190.7	1257.41	1324.74	1402	1124.22
ENSMUSG00000014104	0	0	0	0	0	0	0	0	0	0	0	0	0	0	0	0	0	0	0	0	0	0	0	0	0	0	0	0	0	0	0	0	0
ENSMUSG00000014158	30.116	22.5064	20.1199	83.585	89.5606	52.0093	44.4506	29.6383	77.2588	16.8189	17.0013	20.5429	9.88384	40.8347	6.41483	18.3021	17.1271	69.8762	11.0898	53.8308	13.2485	59.4974	17.783	38.0432	30.8998	65.6002	12.713	27.7928	63.766	22.0995	28.9674	34.5571	23.8871
ENSMUSG00000014164	32.2437	33.8397	36.3021	163.11	132.175	112.195	37.1654	39.7651	122.61	14.7598	29.4493	29.6151	33.9195	32.9279	21.1705	49.9496	26.7947	171.996	27.745	144.97	29.8013	149.353	36.0007	109.131	30.8793	137.558	13.4946	31.7662	157.524	30.8678	34.3717	46.4443	30.855
ENSMUSG00000014177	206.406	215.883	191.196	245.001	246.97	253.405	269.178	178.671	214.314	200.045	275.114	334.365	256.23	213.873	208.176	184.035	248.202	330.241	261.24	286.498	245.855	236.025	203.908	238.522	129.37	294.74	328.554	190.472	264.481	249.081	262.956	226.409	217.915
ENSMUSG00000014195	2738.56	2807.29	2386.4	3009.62	3708.26	3250.52	2793.08	3014.37	3584.29	1432.05	3019.22	3752.07	3865.22	2822.93	2887.53	3203.73	3384.93	3444.79	3378.26	3679.91	3532.3	3586.23	2442.68	2186.37	2576.34	3425.98	3135.69	2725.23	2862.97	2618.86	3350.83	3054.92	3268.31
ENSMUSG00000014198	0	0	12.719	4.07001	20.1563	6.07048	9.14834	1.99413	3.81929	3.4797	0	3.31096	2.00418	1.02277	4.28879	3.69775	0	7.23386	1.50038	7.08291	1.17221	4.776	14.3547	35.199	1.07327	10.0141	1.13394	0.877059	7.76245	1.45999	3.7975	1.78788	5.10975
ENSMUSG00000014226	2316.13	2099.31	2536.09	699.384	946.249	1344.24	2536.12	2258.54	1767.78	3308.49	2954.82	4167.04	3120.43	2643.48	3234.73	2589.53	3511.38	982.739	3562.03	2247.82	3047.08	1304.12	2225.55	1259.11	1995.01	1473.8	2936.38	2349.34	932.329	2547.78	3038.37	2450.17	3161.47
ENSMUSG00000014232	333.297	312.408	244.352	227.329	251.163	319.466	284.79	329.886	335.698	396.249	290.426	473.097	369.574	377.889	376.614	365.584	366.859	242.686	359.979	388.974	440.393	387.032	218.562	207.162	355.083	365.889	341.104	281.976	210.195	340.166	350.184	390.507	356.258
ENSMUSG00000014243	35.5006	40.0817	31.2651	46.7309	61.5193	39.491	28.7846	32.0538	55.1789	63.6639	43.8323	40.9862	48.0162	34.4371	54.0727	41.3812	46.164	62.6391	52.2627	50.9407	31.9922	70.1934	27.6333	37.5581	35.1861	49.1788	35.3837	21.657	51.7933	15.6599	23.8796	37.6901	54.5343
ENSMUSG00000014245	234.377	218.51	178.225	188.249	163.463	199.16	197.141	151.323	182.304	128.497	169.952	219.515	191.79	195.243	151.179	158.495	177.678	201.9	296.813	212.546	153.868	175.994	188.172	124.479	166.03	193.819	163.367	202.836	147.69	195.555	199.284	212.348	182.907
ENSMUSG00000014294	799.75	710.974	1028.72	424.555	778.572	618.035	576.684	773.061	787.994	1248	1022.09	1193.6	1236.42	797.957	1498.73	1190.97	1258.47	619.319	1291.49	890.963	1272.69	750.377	646.423	392.384	769.206	674.733	1326.38	656.602	518.929	794.739	1018.86	815.048	1217.93
ENSMUSG00000014301	101.177	141.931	162.269	80.1185	122.015	78.7518	133.272	153.094	118.359	141.841	146.762	165.701	141.134	111.284	147.145	152.903	124.416	109.9	142.708	167.94	190.698	107.085	125.222	62.6826	165.786	141.557	128.46	75.8141	96.2625	111.657	117.208	146.369	127.22
ENSMUSG00000014303	57.5108	57.3988	46.6988	80.7202	87.465	83.3396	49.9618	84.8554	72.7455	24.4726	33.5802	31.4508	19.3477	35.0154	28.502	56.9807	40.5946	158.395	34.9328	94.1199	19.4714	81.6294	25.1352	232.888	32.5523	124.569	18.9324	22.8475	82.5133	26.5313	64.3874	41.4938	53.522
ENSMUSG00000014313	1498.8	1406.55	1143.94	742.687	1227.04	970.906	1364.28	1420.04	1303.07	2430.66	1314.96	1740.02	1712.63	1513.39	1756.75	1533.78	1782.09	992.603	1862.35	1603.99	1709.4	1176.96	1148.81	750.605	1488.74	1468.32	1549.49	1383.64	754.679	1523.94	1394.24	1519.96	1519.27
ENSMUSG00000014329	62.6332	102.692	80.5174	272.758	204.84	168.755	129.581	105.461	201.916	41.2379	110.964	112.832	96.6749	126.013	65.2884	108.571	109.588	306.602	111.592	192.769	113.98	186.603	74.7773	228.519	117.367	266.005	87.193	70.0861	266.306	82.1255	110.93	78.2997	86.7097
ENSMUSG00000014349	1291.83	1105.11	883.493	1141.43	1349.39	1295.31	1201.01	1197.3	1451.11	797.672	1065.92	1457.51	1196.4	1355.84	949.844	1130.41	1308.65	1558.91	1289.48	1609.13	1207.7	1390.03	1056.98	1158.37	1172.87	1329.79	1056.46	1050.37	1291.84	1197.98	1092.49	1382.28	1056.35
ENSMUSG00000014351	0	0	0	0	0	0	0	0	0	0	0	0	0	0	0	0	0	0	0	0	0	0	0	0	0	0	0	0	0	0	0	0	0
ENSMUSG00000014353	349.118	267.292	204.012	597.231	511.385	421.472	351.941	367.19	393.87	257.239	318.053	467.596	375.584	386.895	221.031	333.739	319.902	610.008	269.716	498.258	377.504	557.342	239.344	454.93	370.655	611.658	369.264	281.732	545.69	352.81	323.799	266.238	411.928
ENSMUSG00000014355	4219.57	3371.29	3053.36	2123.02	2288.31	3042.71	4132.3	3939.23	2954.1	2196.53	3235.66	4524.63	4395.08	4766.73	2953.58	3202.48	3964.52	2039.04	3752.46	3019.28	4672.37	2747.19	3852.11	1728.3	4402.15	2966.11	3665.5	4242.46	2199.64	4177.54	4018.63	3889.71	2814.99
ENSMUSG00000014361	273.393	192.454	132.859	360.299	341.143	257.345	448.356	217.271	302.724	154.868	142.79	211.674	170.095	287.586	80.1042	192.017	202.522	577.748	219.733	377.167	155.985	344.953	147.088	341.399	273.945	487.313	126.565	191.118	444.798	307.782	165.342	135.569	146.05
ENSMUSG00000014402	523.193	466.079	455.42	524.755	672.275	596.359	536.856	379.028	581.267	438.774	440.762	676.8	672.801	551.182	549.907	417.388	661.3	759.635	650.881	708.149	650.269	639.93	496.541	518.047	449.314	676.349	618.648	584.054	604.656	622.32	589.357	454.755	504.754
ENSMUSG00000014418	1136.15	1160.26	729.066	968.69	1035.18	964.92	839.641	1376.96	1438.13	687.797	796.339	1253.04	1130.68	1269.16	718.373	744.554	1227.26	992.472	958.773	1208.27	1185.52	945.033	1141.12	878.289	1061.66	1239.83	1167.15	800.582	1085.88	956.867	1093.98	1229.07	855.995
ENSMUSG00000014426	865.215	703.032	574.606	667.652	763.531	757.668	727.954	675.308	894.558	282.657	655.867	886.727	771.032	843.841	509.405	701.124	738.012	754.504	678.98	710.786	789.356	660.73	717.043	605.232	729.793	695.28	667.571	735.622	718.843	721.26	776.955	821.797	654.111
ENSMUSG00000014444	1807.16	2184.39	2488.6	1457.55	2155.4	2301.8	2344.78	1956.88	2837.25	1002.61	1493.41	2128.46	2112.63	1968.48	1802.98	2257.73	2116.95	2286.51	2009.85	2847.98	2397.47	2280.7	2014.67	1627.77	2185.9	2099.14	2009.68	1806.03	1857.58	1917.85	1816.9	1909.9	2239.13
ENSMUSG00000014453	692.925	1006.73	331.03	1818.75	2024.56	1473.19	605.732	932.428	1760.35	675.717	487.468	341.552	349.375	620.843	278.553	427.094	259.972	1917.22	348.971	1238.55	404.309	1912.59	680.532	1148.58	714.132	1406.66	274.707	827.986	1366.12	602.115	375.785	644.635	621.543
ENSMUSG00000014470	363.755	321.074	315.889	719.301	697.695	669.713	325.165	303.773	590.379	216.936	283.704	324.041	188.801	483.232	220.51	278.025	331.653	660.818	394.947	451.299	286.793	576.712	292.089	535.482	329.984	641.667	304.402	357.616	755.493	350.44	241.03	326.634	298.697
ENSMUSG00000014496	1226.28	981.621	844.77	563.726	583.229	936.893	1027.21	993.087	961.827	840.329	806.105	1395.22	1824.69	1205.89	722.786	874.766	1293.14	553.461	1234.07	687.263	1524.36	739.64	906.381	770.731	1500.1	1238.6	1121.71	1176.96	816.946	1311.31	1391.88	708.693	708.307
ENSMUSG00000014498	3558.02	2624.27	2067.14	1943.62	1593.97	2522.29	2910.75	2816.18	2149.39	825.792	2260.45	2485.79	1918.1	4044.97	1201.05	1870.54	1835.94	1451.59	1727.44	2134.96	2310.88	1728.85	2806.77	1627.1	3161.23	2405.53	1959.78	2500.11	1946.52	2597.2	1875.3	2448.53	2162.27
ENSMUSG00000014503	14.2343	9.85035	15.1419	4.66998	9.46332	17.4123	7.65874	6.19241	19.7236	5.16003	24.3039	22.5127	17.8973	4.33826	15.3174	29.3591	20.7171	3.34094	26.5183	16.5152	18.7623	19.4814	7.40845	8.71579	1.07738	23.8521	13.3511	9.76595	5.60766	2.75519	24.1288	5.30496	10.4239
ENSMUSG00000014504	840.496	782.914	908.213	348.094	539.99	565.155	883.62	842.002	688.574	1201.26	1116.18	1497.51	1484.94	848.546	1266.13	1234.15	1379.59	451.505	1505.91	814.636	1473.41	662.416	781.552	406.141	820.685	717.119	1249.19	750.373	365.327	905.555	1340.33	973.322	1158.49
ENSMUSG00000014529	0	0	0	0	0	0	0	0	0	0	0	0	0	0	0	0	0	0	0	0	0	0	0	0	0	0	0	0	0	0	0	0	0
ENSMUSG00000014542	0	0	0	0	3.59935	0	0	0	0.558201	0	0	0	0.576838	0	0	0	0	0.582561	0	0	0	3.52845	0	0	0	0	0	0	0	0.56435	0	0	0
ENSMUSG00000014543	5.97389	3.75997	3.97361	24.093	21.854	9.96808	4.88831	1.90372	9.53509	9.45272	6.95888	8.86181	9.08995	7.94735	8.24071	17.3237	6.07954	28.5618	5.07379	8.06785	5.90841	13.8259	6.97504	16.9645	7.70167	28.7991	5.1036	2.98176	15.7669	6.91734	8.82034	9.28097	5.96833
ENSMUSG00000014547	420.92	309.606	293.82	722.53	631.694	602.309	502.272	368.49	583.933	167.858	345.652	468.733	377.227	434.726	267.084	373.709	365.189	846.386	392.081	639.562	365.589	643.389	370.513	610.593	392.068	705.593	335.034	372.537	657.686	404.76	321.819	330.055	346.678
ENSMUSG00000014550	524.359	1012.87	296.875	641.197	321.486	639.603	422.448	635.794	698.133	480.319	272.086	644.28	477.566	670.157	351.659	275.014	313.932	772.786	676.256	450.745	529.018	704.168	375.946	264.648	746.756	753.562	624.895	504.407	510.899	669.197	434.386	563.425	281.369
ENSMUSG00000014551	571.435	447.474	351.506	190.838	321.963	341.897	491.338	423.916	445.307	456.066	343.928	524.541	517.374	459.367	473.614	417.217	528.227	267.515	517.547	598.43	520.351	416.554	417.552	252.825	288.05	376.565	442.466	431.016	257.952	555.431	422.506	527.505	404.102
ENSMUSG00000014554	335.669	286.109	283.531	422.282	388.107	354.795	209.214	195.209	436.278	191.559	313.48	226.23	241.662	314.259	148.6	326.851	219.874	448.484	270.608	363.727	199.832	495.579	223.633	407.413	140.321	490.422	227.962	172.662	342.663	344.319	211.838	286.731	202.349
ENSMUSG00000014592	211.594	147.41	186.968	77.2225	127.119	103.771	200.066	188.26	203.721	318.289	188.641	254.941	192.208	198.752	181.044	228.511	198.374	137.032	242.087	228.064	267.18	154.535	168.137	79.4034	218.932	201.055	289.718	205.808	120.905	217.823	273.179	197.039	225.967
ENSMUSG00000014599	229.907	302.944	254.902	1242.39	843.94	924.511	276.283	434.751	923.418	161.916	336.595	381.971	447.82	581.43	224.135	295.321	301.465	1045.14	209.13	764.926	341.623	909.543	325.627	1098.87	526.812	1030.07	322.344	317.06	1322.05	415.99	290.218	324.998	445.793
ENSMUSG00000014601	528.171	469.79	420.845	752.909	754.195	813.219	563.493	706.045	858.254	416.439	531.024	505.049	554.043	694.921	387.759	743.033	553.537	787.675	733.668	923.692	766.229	767.611	437.802	796.79	499.671	666.843	509.249	610.364	957.76	496.351	608.489	535.782	588.665
ENSMUSG00000014602	3.87	4.49423	5.86162	55.6453	39.6021	74.3699	13.3354	35.4563	26.6071	2.93934	66.8474	6.43899	10.8661	77.8551	6.72972	8.71413	8.66458	37.1141	5.52197	27.4391	6.2775	33.9565	6.50855	32.582	4.60288	44.4354	3.33364	40.3256	67.3728	6.14564	70.6932	9.61433	13.4751
ENSMUSG00000014603	0	0	0	23.1547	3.79476	1.48593	1.49393	0.709468	2.1855	0.704555	0.749665	0	0	0	0	0	0.755223	3.9222	0.756356	7.88128	0	7.22293	0	0.743793	0.735534	2.22056	0	0	7.73351	0	0	0	0.759987
ENSMUSG00000014606	620.42	589.069	489.636	1096.64	998.277	1032.88	606.63	471.505	957.727	422.243	516.667	608.498	547.177	590.971	488.319	519.965	616.787	1123.57	711.169	818.662	591.76	965.339	600.806	1038.71	407.323	1069.33	476.081	606.907	1115.53	507.166	439.096	750.564	504.746
ENSMUSG00000014609	2.31783	0.449612	1.4255	4.67395	5.86023	6.96158	0.935283	1.52059	2.28043	0	2.07612	0	0	2.31263	0	2.37228	0	1.90398	0	7.46006	7.04958	1.39735	2.31966	6.96208	2.29729	7.06762	2.37619	2.31379	2.81558	1.84449	0	1.51978	0
ENSMUSG00000014633	221.939	226.244	161.967	88.0793	167.563	166.235	225.73	236.77	302.897	320.346	187.552	333.262	334.862	316.699	308.177	260.938	347.382	74.0533	314.498	258.657	317.87	193.895	255.736	101.039	212.932	194.82	330.363	237.687	114.307	278.135	316.434	316.847	250.095
ENSMUSG00000014668	1048.3	882.11	623.672	870.698	896.695	887.363	751.487	870.584	948.147	499.719	732.783	899.98	772.574	972.393	473.476	698.559	783.945	860.416	855.285	1016.78	801.567	944.519	872.787	764.253	791.028	1028.16	620.154	766.39	881.671	797.511	763.696	1030.98	630.323
ENSMUSG00000014686	18.3681	20.9339	8.05106	51.1501	121.847	54.7769	39.3568	8.36202	46.3665	4.98252	16.7883	19.5293	3.54909	17.4542	1.80985	25.0663	8.01125	64.5206	3.56584	34.5519	10.6411	66.6444	7.00288	41.9399	7.8023	90.8366	9.86369	6.98519	34.4546	11.2856	9.7078	17.8109	22.1528
ENSMUSG00000014704	0.986116	0	3.02566	7.95421	13.1107	1.97457	0.992584	2.82829	7.53575	0.936235	0.996208	5.99797	3.00099	2.34634	1.02026	0	3.37451	8.97477	2.0101	5.99303	2.99926	5.74721	2.218	7.90697	4.89339	4.9179	3.03289	1.96884	10.9563	2.93621	2.98497	4.71124	2.01981
ENSMUSG00000014725	2.96396	1.90814	2.02564	22.4339	11.2286	10.8504	4.03214	2.82784	17.2925	3.73719	3.87602	4.00055	1.99918	5.90124	5.10311	6.86165	1.59993	12.1829	4.02216	9.9902	4.92835	14.8684	5.34564	5.94254	2.93134	8.96105	2.02372	2.20248	13.9448	0.978487	0.994717	3.76916	5.05083
ENSMUSG00000014747	0	0	0	0	0	0	0	0	0	0	0	0	0	0	0	0	0	0	0	0	0	0	0	0	0	0	0	0	0	0.978746	0	0	0
ENSMUSG00000014748	1664.8	1567.95	1001.1	1235.43	1071.54	1216.44	1403.04	1654.49	1345.49	1491.29	1155.09	1561.78	1269.93	1824.28	1003.49	1107.32	1392.98	1223.01	1443.89	1348.5	1507.34	1402.58	1487.7	1081.53	1683.2	1266.55	1122.4	1486.31	989.622	1604.79	1086.62	2045.8	1149.75
ENSMUSG00000014763	594.865	489.615	399.252	832.614	802.522	789.909	582.63	498.413	759.385	292.443	503.529	666.703	581.388	551.666	379.295	505.586	506.73	966.993	568.895	838.61	561.731	851.384	527.643	720.154	391.06	924.218	476.334	558.787	838.228	559.565	541.334	526.045	522.161
ENSMUSG00000014767	633.638	438.351	496.281	411.073	420.355	604.752	594.422	432.43	422.187	489.292	468.908	681.233	669.668	625.515	522.483	542.529	852.374	474.559	759.161	542.872	735.281	456.731	499.297	428.166	619.656	602.153	539.224	567.982	379.02	694.943	667.515	441.223	615.931
ENSMUSG00000014769	2738.82	2265.08	2044.37	1479.84	2207.33	2046.39	2423.68	2480.65	2300.21	4218.16	2340.17	3031.34	3203.15	2717.09	2913.28	2365.19	3184.62	1888.01	3145.57	2757.9	3143.58	2246.24	2156.24	1400.57	2765.17	2215.26	2743.17	2272.11	1682.13	2726.93	2412.62	2631.39	2532.39
ENSMUSG00000014771	559.24	469.155	357.342	254.332	406.339	354.213	460.387	533.044	416.628	695.139	475.285	635.271	740.657	551.205	639.514	430.819	687.141	318.616	641.921	547.276	646.365	406.316	411.1	222.354	461.298	374.039	617.61	406.784	254.692	479.627	588.893	407.227	495.122
ENSMUSG00000014773	63.1471	43.3779	50.2483	175.146	105.036	82.5141	58.0135	116.633	53.6283	7.31436	47.6342	53.6481	22.7352	61.6186	25.3613	26.523	53.4158	186.814	17.8456	72.3596	18.4616	84.2597	52.2089	132.115	91.5888	92.8624	36.4457	26.2892	132.362	13.2076	20.4935	20.0765	57.5943
ENSMUSG00000014776	4.93066	3.81734	8.06846	27.8397	33.281	14.1143	10.9207	8.48481	19.3611	3.74493	9.9619	9.99666	2.00071	7.87137	11.2226	6.05578	11.0392	41.8123	19.0351	18.9779	9.86556	36.5796	7.89524	11.8605	7.81909	30.4908	10.1096	2.95326	22.9086	8.80869	3.97993	8.48029	16.1583
ENSMUSG00000014778	494.546	412.074	393.632	679.286	563.231	603.408	482.27	450.026	618.518	137.139	467.358	353.64	284.743	486.972	276.019	538.828	276.445	874.446	469.551	551.063	373.946	631.383	374.64	681.043	315.126	676.955	362.005	496.663	704.712	524.944	424.577	484.823	398.324
ENSMUSG00000014782	4.2039	1.41425	2.98929	2.21019	0.85991	2.78271	4.23533	6.2871	3.30151	3.98534	1.87188	0	1.26656	3.64529	1.51199	5.23508	6.55654	1.49721	5.13533	2.12596	6.97655	4.89585	8.56405	2.92946	9.18293	0.924123	2.24732	4.37656	4.23992	7.50434	4.2355	5.58552	31.1872
ENSMUSG00000014786	145.428	140.333	87.3189	65.6192	87.9659	68.2061	111.242	135.491	94.2752	99.8843	116.829	113.947	105.681	148.949	114.795	161.217	97.6681	63.8453	103.256	96.8841	105.37	74.6871	136.916	65.766	157.679	79.4679	99.9441	176.095	60.3103	151.199	111.708	148.37	126.198
ENSMUSG00000014791	40.6217	27.2629	48.0035	85.5208	95.5104	87.3219	58.8879	50.619	89.9768	21.182	39.4958	64.0843	43.0722	48.4085	52.9937	46.1616	36.8514	82.4678	48.9994	68.4888	41.198	114.814	38.9575	72.7501	22.3167	88.0788	26.6472	38.7187	90.3046	48.2255	43.1313	44.1859	45.3463
ENSMUSG00000014813	46.3481	32.4471	50.4276	221.723	186.575	168.824	59.5543	70.7068	82.2843	35.5769	48.8133	72.9754	65.0219	59.035	59.174	48.4463	65.2317	183.876	54.2728	221.742	60.9851	177.955	45.3977	183.837	110.445	234.091	41.4494	32.4856	304.784	79.2782	58.7042	48.0548	60.5937
ENSMUSG00000014837	106.335	115.944	68.7148	137.72	99.191	69.5835	98.4705	72.1136	72.1851	61.8395	73.4718	77.2672	95.9192	80.9495	55.9459	95.9402	47.2468	88.5504	50.9005	110.542	75.3161	126.47	47.9505	58.4222	55.4911	111.439	52.7209	66.3597	131.849	75.321	83.3519	84.1581	53.5219
ENSMUSG00000014846	48.1458	24.1444	41.6047	96.0109	81.4447	36.3041	51.5908	64.0807	79.6208	37.6431	44.356	41.9644	40.197	51.9048	30.35	57.8433	51.2816	102.352	26.2061	70.6599	36.229	71.1344	35.6682	84.2724	45.7952	112.063	48.3993	36.1971	50.6684	31.2898	43.2179	31.9461	79.2649
ENSMUSG00000014850	966.873	871.277	647.25	382.208	563.479	650.573	750.23	998.006	671.06	708.728	805.153	1195.64	1144.56	826.286	1049.58	1106.32	869.173	364.235	1033.79	794.014	1110.59	530.105	718.301	397.408	1053.06	656.859	968.326	866.711	477.064	843.201	1008.95	787.128	979.515
ENSMUSG00000014852	10.3595	7.97475	3.20186	48.4441	30.6987	26.0612	12.4328	3.93369	33.9262	4.88575	11.5205	7.31707	6.30964	10.3214	5.39843	17.1259	7.39247	59.5474	6.35172	35.0676	6.30132	30.1004	12.6474	53.582	11.2819	34.0299	4.25075	4.10791	60.7005	10.2416	5.19704	6.90151	14.9456
ENSMUSG00000014856	385.727	336.739	300.193	309.945	405.427	330.942	307.952	367.497	410.341	625.486	310.572	374.698	373.221	399.56	383.858	324.235	418.738	354.424	407.288	453.5	390.938	362.959	368.41	248.928	310.294	391.98	312.946	332.316	344.925	360.291	298.838	445.639	340.338
ENSMUSG00000014859	2132.03	1824.16	1583.35	993.244	1313.12	1602.08	1810.59	1929.29	1750.06	1241.33	1691.66	2067.84	1847.25	2322.32	1786.13	1708.48	1837.15	1071.44	1837.58	1755.69	1982.48	1604.9	1912.01	1114.88	2146.67	1596.65	1825.71	1936.09	1211.57	2093.57	1597.98	2223.32	1705.49
ENSMUSG00000014867	1763.77	1992.7	1394.29	1737.14	1685.5	2018.48	1923.57	2115.78	2241.16	1914.69	1813.09	2193.43	1402.95	2088.91	1288.92	1525.72	2061.57	1845.73	1887.85	2224.5	1758.21	2385.13	1976.67	1899.65	2147.78	2269.93	1504.16	1973.96	1932.05	1685.22	1604.39	2762.04	1734.53
ENSMUSG00000014873	671.831	724.652	478.101	381.119	498.93	531.051	638.554	642.793	586.595	552.702	519.667	680.235	662.728	739.924	520.312	595.461	615.788	466.986	657.035	661.31	591.199	550.54	679.816	392.77	493.896	690.192	546.003	601.311	454.407	644.495	555.752	627.081	552.392
ENSMUSG00000014905	263.447	188.731	195.416	398.921	304.955	342.976	330.413	176.791	214.093	254.958	218.367	318.91	322.061	241.673	260.579	246.92	285.782	560.574	263.584	348.947	312.091	354.091	228.886	439.109	260.156	422.541	256.231	230.235	411.319	262.431	307.68	148.453	252.007
ENSMUSG00000014907	582.553	480.102	401.012	154.429	224.548	380.008	667.458	344.485	292.805	215.18	612.006	844.64	899.491	657.79	517.52	514.359	618.983	134.154	678.244	495.323	731.208	345.706	573.521	230.712	628.856	375.296	524.613	612.499	197.624	554.466	808.892	313.001	674.76
ENSMUSG00000014932	255.002	179.689	133.079	162.708	142.475	128.754	218.099	182.627	124.232	100.277	144.403	226.084	236.095	247.02	151.323	208.353	208.49	200.588	230.41	199.857	220.687	130.889	227.527	135.98	170.216	198.474	148.669	210.063	179.232	198.443	202.837	187.563	140.51
ENSMUSG00000014956	5241.53	3012.73	3377.49	2287.64	2468.62	3086.3	5523.79	2748.81	2045.27	2445.25	4174.34	6431.93	6516.06	4651.09	4599	4253.59	5761.7	3015.96	5670.45	3385.74	6059.07	3036.76	4136.77	2451.14	4216.23	3341.94	4580.87	4248.78	2620.98	5114.92	5403.25	2192.15	4070.35
ENSMUSG00000014959	1843.23	1495.2	1256.44	1142.74	1176.99	1414.15	1740.99	1609.58	1411.56	1381.14	1292.56	1907.12	1553.92	1887.67	1436.13	1380.95	1764.49	1252.63	1706.64	1580.92	1741.93	1344.37	1480.05	991.529	1992.55	1613.83	1450.12	1418.11	1201.93	1632.23	1454.91	1540.98	1373.47
ENSMUSG00000014980	430.079	265.198	316.505	168.989	211.273	245.911	327.039	243.942	259.037	722.972	400.231	433.276	494.437	428.852	453.24	371.006	380.837	156.069	455.406	249.973	427.756	258.032	322.088	174.879	288.173	244.986	431.787	326.664	154.481	363.931	380.118	285.137	458.029
ENSMUSG00000015001	0	0	0	0	0	0	0	0	0	0	0	0	0	0	0	0	0	0	0	0	0	0	0	0	0	0	0	0	0	0	0	0	0
ENSMUSG00000015002	1941.91	1531.81	983.071	1463.8	1404.13	1471.7	1590.96	1522.75	1207.36	1059.76	1180.4	1469.65	1495.42	2174.23	853.839	1384.33	1577.78	1682.97	1411.73	1472.77	1669.67	1443.69	1325.91	1106.86	1671.78	1566.93	1524.8	1620.74	1252.68	1372.48	1697.99	1707.23	1372.66
[truncated: 52,150 more rows]
