# Supplementary material for: Regulation of CHK1 inhibitor resistance by a c-Rel and USP1 dependent pathway
Source: Biochem J. 2022 Oct 14;479(19):2063–86. doi: 10.1042/BCJ20220102 (PMC9704646; doi:10.1042/BCJ20220102)
Supplement: Supplementary Material 8 [file BCJ-479-2063-s8.pdf]

## Sheet: Description
Supp Data File 6 RNASeq all_genes_list_U2OS.xlsx
Gene lists from RNA Seq analysis of wild type control and CHK1i (CCT244747) resistant U2OS cells with or without CCT244747 treatment for 24 hours.
Tab 1: Comparison of gene expression changes in between WT untreated U2OS cells (WT.Not) and untreated CHK1i resistant U2OS cells (CR.Not)
Tab 2: Comparison of gene expression changes in between WT untreated U2OS cells (WT.Not) and WT CHK1i treated U2OS cells (WT.CHK1i)
Tab 3: Comparison of gene expression changes in between untreated CHK1i resistant U2OS cells (CR.Not) and CHK1i treated resistant U2OS cells U2OS cells (CR.CHK1i)
Tab 4: Comparison of gene expression changes in between CHK1i treated WT U2OS cells (WT.CHK1i) and CHK1i treated CHK1i resistant U2OS cells (CR.CHK1i)
Tab 5: Comparison of gene expression changes in between untreated WT U2OS cells (WT.Not) and CHK1i treated CHK1i resistant U2OS cells (CR.CHK1i)
Tab 6: Comparison of gene expression changes in between CHK1i treated WT U2OS cells (WT.CHK1i) and untreated CHK1i resistant U2OS cells (CR.CHK1i)

## Sheet: CT_CR.Not_WT.Not
	Gene	baseMean	log2FoldChange	lfcSE	stat	pvalue	padj	ensembl_geneid	entrez	symbol	chr	start	end	strand	biotype	description	Panther.Class.1	Panther.Class.2	Panther.Class.3	GeneID
ENSG00000000003	ENSG00000000003	1380.39	0.151713	0.123721	1.22625	0.220106	0.407759	ENSG00000000003	7105	TSPAN6	X	100627109	100639991	-1	protein_coding	tetraspanin 6 [Source:HGNC Symbol;Acc:HGNC:11858]	NA	NA	NA	ENSG00000000003
ENSG00000000005	ENSG00000000005	2.06304	3.97692	4.22101	0.942174	0.346104	0.544045	ENSG00000000005	64102	TNMD	X	100584802	100599885	1	protein_coding	tenomodulin [Source:HGNC Symbol;Acc:HGNC:17757]	NA	NA	NA	ENSG00000000005
ENSG00000000419	ENSG00000000419	1371.39	0.23011	0.126879	1.81361	0.069737	0.185965	ENSG00000000419	8813	DPM1	20	50934867	50958555	-1	protein_coding	dolichyl-phosphate mannosyltransferase subunit 1, catalytic [Source:HGNC Symbol;Acc:HGNC:3005]	glycosyltransferase(PC00111)	NA	NA	ENSG00000000419
ENSG00000000457	ENSG00000000457	206.445	0.104302	0.166951	0.624746	0.532138	0.708509	ENSG00000000457	57147	SCYL3	1	169849631	169894267	-1	protein_coding	SCY1 like pseudokinase 3 [Source:HGNC Symbol;Acc:HGNC:19285]	NA	NA	NA	ENSG00000000457
ENSG00000000460	ENSG00000000460	634.771	0.135125	0.231182	0.584496	0.558887	0.729488	ENSG00000000460	55732	C1orf112	1	169662007	169854080	1	protein_coding	chromosome 1 open reading frame 112 [Source:HGNC Symbol;Acc:HGNC:25565]	NA	NA	NA	ENSG00000000460
ENSG00000000938	ENSG00000000938	0.427055	1.37919	2.43058	0.567431	0.570422	NA	ENSG00000000938	2268	FGR	1	27612064	27635277	-1	protein_coding	FGR proto-oncogene, Src family tyrosine kinase [Source:HGNC Symbol;Acc:HGNC:3697]	NA	NA	NA	ENSG00000000938
ENSG00000000971	ENSG00000000971	217.037	0.919674	0.374859	2.45339	0.0141519	0.0577404	ENSG00000000971	3075	CFH	1	196651878	196747504	1	protein_coding	complement factor H [Source:HGNC Symbol;Acc:HGNC:4883]	NA	NA	NA	ENSG00000000971
ENSG00000001036	ENSG00000001036	1973.91	0.26896	0.237273	1.13354	0.256985	0.450745	ENSG00000001036	2519	FUCA2	6	143494811	143511690	-1	protein_coding	fucosidase, alpha-L- 2, plasma [Source:HGNC Symbol;Acc:HGNC:4008]	NA	NA	NA	ENSG00000001036
ENSG00000001084	ENSG00000001084	1678.54	0.0995348	0.158736	0.627045	0.53063	0.707357	ENSG00000001084	2729	GCLC	6	53497341	53616970	-1	protein_coding	glutamate-cysteine ligase catalytic subunit [Source:HGNC Symbol;Acc:HGNC:4311]	ligase(PC00142)	NA	NA	ENSG00000001084
ENSG00000001167	ENSG00000001167	2511.81	0.397979	0.21792	1.82626	0.0678111	0.182568	ENSG00000001167	4800	NFYA	6	41072945	41099976	1	protein_coding	nuclear transcription factor Y subunit alpha [Source:HGNC Symbol;Acc:HGNC:7804]	nucleic acid binding(PC00171)	transcription factor(PC00218)	NA	ENSG00000001167
ENSG00000001460	ENSG00000001460	317.767	0.205803	0.186241	1.10504	0.269144	0.465196	ENSG00000001460	90529	STPG1	1	24356999	24416934	-1	protein_coding	sperm tail PG-rich repeat containing 1 [Source:HGNC Symbol;Acc:HGNC:28070]	structural protein(PC00211)	NA	NA	ENSG00000001460
ENSG00000001461	ENSG00000001461	696.52	0.58458	0.230514	2.53598	0.0112133	0.0483576	ENSG00000001461	57185	NIPAL3	1	24415794	24472976	1	protein_coding	NIPA like domain containing 3 [Source:HGNC Symbol;Acc:HGNC:25233]	NA	NA	NA	ENSG00000001461
ENSG00000001497	ENSG00000001497	2096.68	0.413887	0.107913	3.83537	0.000125373	0.00132946	ENSG00000001497	81887	LAS1L	X	65512582	65534775	-1	protein_coding	LAS1 like, ribosome biogenesis factor [Source:HGNC Symbol;Acc:HGNC:25726]	NA	NA	NA	ENSG00000001497
ENSG00000001561	ENSG00000001561	618.683	-0.216952	0.175582	-1.23562	0.216601	0.403632	ENSG00000001561	22875	ENPP4	6	46129993	46146699	1	protein_coding	ectonucleotide pyrophosphatase/phosphodiesterase 4 (putative) [Source:HGNC Symbol;Acc:HGNC:3359]	nucleotide phosphatase(PC00173)	pyrophosphatase(PC00196)	NA	ENSG00000001561
ENSG00000001617	ENSG00000001617	1229.09	0.340912	0.328324	1.03834	0.299111	0.49777	ENSG00000001617	6405	SEMA3F	3	50155045	50189075	1	protein_coding	semaphorin 3F [Source:HGNC Symbol;Acc:HGNC:10728]	membrane-bound signaling molecule(PC00152)	NA	NA	ENSG00000001617
ENSG00000001626	ENSG00000001626	4.14378	3.93848	1.52405	2.58421	0.0097601	0.0433554	ENSG00000001626	1080	CFTR	7	117465784	117715971	1	protein_coding	cystic fibrosis transmembrane conductance regulator [Source:HGNC Symbol;Acc:HGNC:1884]	ATP-binding cassette (ABC) transporter(PC00003)	NA	NA	ENSG00000001626
ENSG00000001629	ENSG00000001629	2554.12	-0.431785	0.342455	-1.26085	0.207363	0.392347	ENSG00000001629	54467	ANKIB1	7	92246234	92401384	1	protein_coding	ankyrin repeat and IBR domain containing 1 [Source:HGNC Symbol;Acc:HGNC:22215]	ubiquitin-protein ligase(PC00234)	NA	NA	ENSG00000001629
ENSG00000001630	ENSG00000001630	2077.51	-0.388699	0.248191	-1.56613	0.117319	0.266882	ENSG00000001630	1595	CYP51A1	7	92112151	92142952	-1	protein_coding	cytochrome P450 family 51 subfamily A member 1 [Source:HGNC Symbol;Acc:HGNC:2649]	oxygenase(PC00177)	NA	NA	ENSG00000001630
ENSG00000001631	ENSG00000001631	939.62	0.181163	0.293464	0.617327	0.537019	0.712007	ENSG00000001631	889	KRIT1	7	92198969	92246166	-1	protein_coding	KRIT1, ankyrin repeat containing [Source:HGNC Symbol;Acc:HGNC:1573]	NA	NA	NA	ENSG00000001631
ENSG00000002016	ENSG00000002016	582.795	1.18039	0.3328	3.54684	0.000389875	0.0033742	ENSG00000002016	5893	RAD52	12	912077	990053	-1	protein_coding	RAD52 homolog, DNA repair protein [Source:HGNC Symbol;Acc:HGNC:9824]	DNA binding protein(PC00009)	NA	NA	ENSG00000002016
ENSG00000002079	ENSG00000002079	252.078	-1.41791	0.405278	-3.49861	0.000467682	0.00392399	ENSG00000002079	NA	MYH16	7	99238829	99311130	1	transcribed_unitary_pseudogene	myosin heavy chain 16 pseudogene [Source:HGNC Symbol;Acc:HGNC:31038]	NA	NA	NA	ENSG00000002079
ENSG00000002330	ENSG00000002330	468.021	-0.0763925	0.245569	-0.311083	0.755737	0.864764	ENSG00000002330	572	BAD	11	64269830	64284704	-1	protein_coding	BCL2 associated agonist of cell death [Source:HGNC Symbol;Acc:HGNC:936]	NA	NA	NA	ENSG00000002330
ENSG00000002549	ENSG00000002549	1087.73	0.301814	0.193516	1.55963	0.118847	0.268999	ENSG00000002549	51056	LAP3	4	17577192	17607972	1	protein_coding	leucine aminopeptidase 3 [Source:HGNC Symbol;Acc:HGNC:18449]	metalloprotease(PC00153)	NA	NA	ENSG00000002549
ENSG00000002586	ENSG00000002586	1756.09	0.390539	0.173009	2.25734	0.023987	0.0863437	ENSG00000002586	4267	CD99	X	2691179	2741309	1	protein_coding	CD99 molecule (Xg blood group) [Source:HGNC Symbol;Acc:HGNC:7082]	NA	NA	NA	ENSG00000002586
ENSG00000002587	ENSG00000002587	6.41346	1.21831	0.609029	2.00041	0.0454558	0.137143	ENSG00000002587	9957	HS3ST1	4	11393150	11429765	-1	protein_coding	heparan sulfate-glucosamine 3-sulfotransferase 1 [Source:HGNC Symbol;Acc:HGNC:5194]	NA	NA	NA	ENSG00000002587
ENSG00000002726	ENSG00000002726	1.839	-0.0989971	1.09364	-0.0905211	0.927873	0.963891	ENSG00000002726	26	AOC1	7	150824627	150861504	1	protein_coding	amine oxidase, copper containing 1 [Source:HGNC Symbol;Acc:HGNC:80]	NA	NA	NA	ENSG00000002726
ENSG00000002745	ENSG00000002745	0	NA	NA	NA	NA	NA	ENSG00000002745	51384	WNT16	7	121325367	121341104	1	protein_coding	Wnt family member 16 [Source:HGNC Symbol;Acc:HGNC:16267]	signaling molecule(PC00207)	NA	NA	ENSG00000002745
ENSG00000002746	ENSG00000002746	81.1475	-0.192122	0.27225	-0.705681	0.480387	0.664997	ENSG00000002746	23072	HECW1	7	43112599	43566001	1	protein_coding	HECT, C2 and WW domain containing E3 ubiquitin protein ligase 1 [Source:HGNC Symbol;Acc:HGNC:22195]	ubiquitin-protein ligase(PC00234)	NA	NA	ENSG00000002746
ENSG00000002822	ENSG00000002822	1301.79	-0.446133	0.182298	-2.44727	0.0143943	0.0585593	ENSG00000002822	8379	MAD1L1	7	1815793	2233243	-1	protein_coding	MAD1 mitotic arrest deficient like 1 [Source:HGNC Symbol;Acc:HGNC:6762]	NA	NA	NA	ENSG00000002822
ENSG00000002834	ENSG00000002834	11836.6	-0.425337	0.169758	-2.50555	0.0122261	0.0517196	ENSG00000002834	3927	LASP1	17	38869859	38921770	1	protein_coding	LIM and SH3 protein 1 [Source:HGNC Symbol;Acc:HGNC:6513]	NA	NA	NA	ENSG00000002834
ENSG00000002919	ENSG00000002919	476.703	-0.188755	0.160499	-1.17605	0.239573	0.431214	ENSG00000002919	29916	SNX11	17	48103357	48123074	1	protein_coding	sorting nexin 11 [Source:HGNC Symbol;Acc:HGNC:14975]	NA	NA	NA	ENSG00000002919
ENSG00000002933	ENSG00000002933	46.0028	0.478452	0.509112	0.939778	0.347331	0.545409	ENSG00000002933	55365	TMEM176A	7	150800403	150805120	1	protein_coding	transmembrane protein 176A [Source:HGNC Symbol;Acc:HGNC:24930]	receptor(PC00197)	NA	NA	ENSG00000002933
ENSG00000003056	ENSG00000003056	6175.27	-0.230465	0.126002	-1.82906	0.0673909	0.181727	ENSG00000003056	4074	M6PR	12	8940363	8949955	-1	protein_coding	mannose-6-phosphate receptor, cation dependent [Source:HGNC Symbol;Acc:HGNC:6752]	receptor(PC00197)	NA	NA	ENSG00000003056
ENSG00000003096	ENSG00000003096	181.712	-0.765571	0.332306	-2.30381	0.0212331	0.0789713	ENSG00000003096	90293	KLHL13	X	117897813	118117340	-1	protein_coding	kelch like family member 13 [Source:HGNC Symbol;Acc:HGNC:22931]	NA	NA	NA	ENSG00000003096
ENSG00000003137	ENSG00000003137	814.122	0.644468	0.195853	3.29057	0.000999839	0.00722849	ENSG00000003137	56603	CYP26B1	2	72129238	72148038	-1	protein_coding	cytochrome P450 family 26 subfamily B member 1 [Source:HGNC Symbol;Acc:HGNC:20581]	oxygenase(PC00177)	NA	NA	ENSG00000003137
ENSG00000003147	ENSG00000003147	68.7668	-0.164248	0.305632	-0.537403	0.590989	0.752883	ENSG00000003147	3382	ICA1	7	8113184	8262687	-1	protein_coding	islet cell autoantigen 1 [Source:HGNC Symbol;Acc:HGNC:5343]	NA	NA	NA	ENSG00000003147
ENSG00000003249	ENSG00000003249	361.003	-1.27597	0.406205	-3.1412	0.00168257	0.0109205	ENSG00000003249	79007	DBNDD1	16	90004865	90020128	-1	protein_coding	dysbindin domain containing 1 [Source:HGNC Symbol;Acc:HGNC:28455]	NA	NA	NA	ENSG00000003249
ENSG00000003393	ENSG00000003393	1458.15	0.27102	0.252603	1.07291	0.283312	0.481293	ENSG00000003393	57679	ALS2	2	201700554	201781189	-1	protein_coding	ALS2, alsin Rho guanine nucleotide exchange factor [Source:HGNC Symbol;Acc:HGNC:443]	NA	NA	NA	ENSG00000003393
ENSG00000003400	ENSG00000003400	74.4456	-0.357495	0.304079	-1.17567	0.239729	0.431372	ENSG00000003400	843	CASP10	2	201182881	201229406	1	protein_coding	caspase 10 [Source:HGNC Symbol;Acc:HGNC:1500]	cysteine protease(PC00081)	protease inhibitor(PC00191)	NA	ENSG00000003400
ENSG00000003402	ENSG00000003402	1180.3	0.361236	0.152469	2.36923	0.017825	0.0692298	ENSG00000003402	8837	CFLAR	2	201116104	201176687	1	protein_coding	CASP8 and FADD like apoptosis regulator [Source:HGNC Symbol;Acc:HGNC:1876]	cysteine protease(PC00081)	protease inhibitor(PC00191)	NA	ENSG00000003402
ENSG00000003436	ENSG00000003436	1059.94	0.129505	0.151935	0.85237	0.394009	0.591671	ENSG00000003436	7035	TFPI	2	187464230	187565760	-1	protein_coding	tissue factor pathway inhibitor [Source:HGNC Symbol;Acc:HGNC:11760]	serine protease inhibitor(PC00204)	NA	NA	ENSG00000003436
ENSG00000003509	ENSG00000003509	940.02	0.861974	0.313515	2.74939	0.00597059	0.0298235	ENSG00000003509	55471	NDUFAF7	2	37231631	37253403	1	protein_coding	NADH:ubiquinone oxidoreductase complex assembly factor 7 [Source:HGNC Symbol;Acc:HGNC:28816]	NA	NA	NA	ENSG00000003509
ENSG00000003756	ENSG00000003756	2797.62	0.361697	0.25513	1.4177	0.156279	0.324602	ENSG00000003756	10181	RBM5	3	50088908	50119021	1	protein_coding	RNA binding motif protein 5 [Source:HGNC Symbol;Acc:HGNC:9902]	NA	NA	NA	ENSG00000003756
ENSG00000003987	ENSG00000003987	2.19716	0.62374	1.16249	0.536553	0.591576	0.753177	ENSG00000003987	9108	MTMR7	8	17298030	17413528	-1	protein_coding	myotubularin related protein 7 [Source:HGNC Symbol;Acc:HGNC:7454]	phosphatase(PC00181)	NA	NA	ENSG00000003987
ENSG00000003989	ENSG00000003989	860.791	0.030296	0.212345	0.142674	0.886548	0.94128	ENSG00000003989	6542	SLC7A2	8	17497088	17570573	1	protein_coding	solute carrier family 7 member 2 [Source:HGNC Symbol;Acc:HGNC:11060]	amino acid transporter(PC00046)	NA	NA	ENSG00000003989
ENSG00000004059	ENSG00000004059	1757.53	-0.336858	0.191123	-1.76252	0.077982	0.200773	ENSG00000004059	381	ARF5	7	127588345	127591705	1	protein_coding	ADP ribosylation factor 5 [Source:HGNC Symbol;Acc:HGNC:658]	NA	NA	NA	ENSG00000004059
ENSG00000004139	ENSG00000004139	78.9018	0.300184	0.355438	0.844549	0.398363	0.595697	ENSG00000004139	23098	SARM1	17	28364356	28404049	1	protein_coding	sterile alpha and TIR motif containing 1 [Source:HGNC Symbol;Acc:HGNC:17074]	NA	NA	NA	ENSG00000004139
ENSG00000004142	ENSG00000004142	1918.53	-0.599442	0.236925	-2.5301	0.0114031	0.0490242	ENSG00000004142	26073	POLDIP2	17	28347177	28357522	-1	protein_coding	DNA polymerase delta interacting protein 2 [Source:HGNC Symbol;Acc:HGNC:23781]	NA	NA	NA	ENSG00000004142
ENSG00000004399	ENSG00000004399	1908.01	0.297774	0.166328	1.79027	0.0734099	0.192731	ENSG00000004399	23129	PLXND1	3	129555175	129606818	-1	protein_coding	plexin D1 [Source:HGNC Symbol;Acc:HGNC:9107]	NA	NA	NA	ENSG00000004399
ENSG00000004455	ENSG00000004455	3591.53	0.181393	0.169845	1.068	0.285522	0.483424	ENSG00000004455	204	AK2	1	33007940	33080996	-1	protein_coding	adenylate kinase 2 [Source:HGNC Symbol;Acc:HGNC:362]	nucleotide kinase(PC00172)	NA	NA	ENSG00000004455
ENSG00000004468	ENSG00000004468	2.73498	2.41578	1.29744	1.86196	0.0626085	0.172864	ENSG00000004468	952	CD38	4	15778275	15853230	1	protein_coding	CD38 molecule [Source:HGNC Symbol;Acc:HGNC:1667]	cyclase(PC00079)	glycosidase(PC00110)	NA	ENSG00000004468
ENSG00000004478	ENSG00000004478	6800.71	0.106695	0.163305	0.653348	0.513532	0.692969	ENSG00000004478	2288	FKBP4	12	2794953	2805423	1	protein_coding	FK506 binding protein 4 [Source:HGNC Symbol;Acc:HGNC:3720]	calcium-binding protein(PC00060)	chaperone(PC00072)	isomerase(PC00135)	ENSG00000004478
ENSG00000004487	ENSG00000004487	3522.38	-0.000282327	0.0947992	-0.00297816	0.997624	0.999191	ENSG00000004487	23028	KDM1A	1	23019448	23083689	1	protein_coding	lysine demethylase 1A [Source:HGNC Symbol;Acc:HGNC:29079]	DNA methyltransferase(PC00013)	oxidase(PC00175)	NA	ENSG00000004487
ENSG00000004534	ENSG00000004534	3590.94	1.10889	0.327717	3.38367	0.00071523	0.00551923	ENSG00000004534	10180	RBM6	3	49940007	50100045	1	protein_coding	RNA binding motif protein 6 [Source:HGNC Symbol;Acc:HGNC:9903]	NA	NA	NA	ENSG00000004534
ENSG00000004660	ENSG00000004660	527.986	0.332897	0.0848488	3.92341	8.73031e-05	0.000985278	ENSG00000004660	84254	CAMKK1	17	3860315	3894891	-1	protein_coding	calcium/calmodulin dependent protein kinase kinase 1 [Source:HGNC Symbol;Acc:HGNC:1469]	NA	NA	NA	ENSG00000004660
ENSG00000004700	ENSG00000004700	3154.1	-0.67805	0.208582	-3.25077	0.00115094	0.00807094	ENSG00000004700	5965	RECQL	12	21468911	21501669	-1	protein_coding	RecQ like helicase [Source:HGNC Symbol;Acc:HGNC:9948]	DNA helicase(PC00011)	NA	NA	ENSG00000004700
ENSG00000004766	ENSG00000004766	541.173	-0.0384825	0.202035	-0.190474	0.848938	0.920126	ENSG00000004766	55610	VPS50	7	93232340	93361121	1	protein_coding	VPS50, EARP/GARPII complex subunit [Source:HGNC Symbol;Acc:HGNC:25956]	NA	NA	NA	ENSG00000004766
ENSG00000004776	ENSG00000004776	23.2915	-1.41925	0.358956	-3.95383	7.691e-05	0.000884973	ENSG00000004776	126393	HSPB6	19	35754569	35758079	-1	protein_coding	heat shock protein family B (small) member 6 [Source:HGNC Symbol;Acc:HGNC:26511]	NA	NA	NA	ENSG00000004776
ENSG00000004777	ENSG00000004777	418.108	-0.68098	0.282872	-2.40738	0.0160676	0.0637357	ENSG00000004777	115703	ARHGAP33	19	35774532	35788822	1	protein_coding	Rho GTPase activating protein 33 [Source:HGNC Symbol;Acc:HGNC:23085]	NA	NA	NA	ENSG00000004777
ENSG00000004779	ENSG00000004779	952.185	-0.0307015	0.153294	-0.200278	0.841263	0.916462	ENSG00000004779	4706	NDUFAB1	16	23581002	23596356	-1	protein_coding	NADH:ubiquinone oxidoreductase subunit AB1 [Source:HGNC Symbol;Acc:HGNC:7694]	transfer/carrier protein(PC00219)	NA	NA	ENSG00000004779
ENSG00000004799	ENSG00000004799	162.9	2.05304	0.655803	3.13057	NA	NA	ENSG00000004799	5166	PDK4	7	95583499	95596491	-1	protein_coding	pyruvate dehydrogenase kinase 4 [Source:HGNC Symbol;Acc:HGNC:8812]	protein kinase(PC00193)	NA	NA	ENSG00000004799
ENSG00000004809	ENSG00000004809	2.00817	-0.598731	1.27239	-0.470557	0.637957	0.787287	ENSG00000004809	85413	SLC22A16	6	110424687	110476641	-1	protein_coding	solute carrier family 22 member 16 [Source:HGNC Symbol;Acc:HGNC:20302]	NA	NA	NA	ENSG00000004809
ENSG00000004838	ENSG00000004838	34.2067	0.925471	0.500638	1.84858	0.0645179	0.176256	ENSG00000004838	51364	ZMYND10	3	50341110	50346852	-1	protein_coding	zinc finger MYND-type containing 10 [Source:HGNC Symbol;Acc:HGNC:19412]	NA	NA	NA	ENSG00000004838
ENSG00000004846	ENSG00000004846	41.8166	-1.36973	0.290135	-4.72099	2.347e-06	4.32451e-05	ENSG00000004846	340273	ABCB5	7	20615207	20777038	1	protein_coding	ATP binding cassette subfamily B member 5 [Source:HGNC Symbol;Acc:HGNC:46]	cysteine protease(PC00081)	serine protease(PC00203)	NA	ENSG00000004846
ENSG00000004848	ENSG00000004848	1.05709	1.93459	1.64606	1.17529	0.239879	NA	ENSG00000004848	170302	ARX	X	25003694	25016420	-1	protein_coding	aristaless related homeobox [Source:HGNC Symbol;Acc:HGNC:18060]	NA	NA	NA	ENSG00000004848
ENSG00000004864	ENSG00000004864	1326.78	-0.2678	0.200828	-1.33348	0.182375	0.35918	ENSG00000004864	10165	SLC25A13	7	96120220	96322147	-1	protein_coding	solute carrier family 25 member 13 [Source:HGNC Symbol;Acc:HGNC:10983]	NA	NA	NA	ENSG00000004864
ENSG00000004866	ENSG00000004866	350.759	-0.0407455	0.149231	-0.273036	0.784826	0.883762	ENSG00000004866	7982	ST7	7	116953238	117230103	1	protein_coding	suppression of tumorigenicity 7 [Source:HGNC Symbol;Acc:HGNC:11351]	NA	NA	NA	ENSG00000004866
ENSG00000004897	ENSG00000004897	3729.09	-0.953553	0.133511	-7.1421	9.19135e-13	6.61987e-11	ENSG00000004897	996	CDC27	17	47117703	47189422	-1	protein_coding	cell division cycle 27 [Source:HGNC Symbol;Acc:HGNC:1728]	NA	NA	NA	ENSG00000004897
ENSG00000004939	ENSG00000004939	12.5892	0.656105	0.515001	1.27399	0.202667	0.386412	ENSG00000004939	6521	SLC4A1	17	44248385	44268141	-1	protein_coding	solute carrier family 4 member 1 (Diego blood group) [Source:HGNC Symbol;Acc:HGNC:11027]	NA	NA	NA	ENSG00000004939
ENSG00000004948	ENSG00000004948	1.83354	-2.87914	1.38746	-2.07512	0.0379755	0.120651	ENSG00000004948	799	CALCR	7	93424487	93574730	-1	protein_coding	calcitonin receptor [Source:HGNC Symbol;Acc:HGNC:1440]	NA	NA	NA	ENSG00000004948
ENSG00000004961	ENSG00000004961	395.795	0.53093	0.16136	3.29034	0.00100067	0.00722849	ENSG00000004961	3052	HCCS	X	11111301	11123078	1	protein_coding	holocytochrome c synthase [Source:HGNC Symbol;Acc:HGNC:4837]	lyase(PC00144)	NA	NA	ENSG00000004961
ENSG00000004975	ENSG00000004975	818.895	-0.456837	0.161386	-2.83071	0.00464443	0.0245168	ENSG00000004975	1856	DVL2	17	7225341	7234545	-1	protein_coding	dishevelled segment polarity protein 2 [Source:HGNC Symbol;Acc:HGNC:3086]	enzyme modulator(PC00095)	signaling molecule(PC00207)	NA	ENSG00000004975
ENSG00000005001	ENSG00000005001	1.40683	-1.89859	1.47981	-1.28299	0.199494	NA	ENSG00000005001	64063	PRSS22	16	2852727	2858170	-1	protein_coding	protease, serine 22 [Source:HGNC Symbol;Acc:HGNC:14368]	serine protease(PC00203)	NA	NA	ENSG00000005001
ENSG00000005007	ENSG00000005007	1624.58	0.408097	0.169732	2.40436	0.0162009	0.064174	ENSG00000005007	5976	UPF1	19	18831938	18868236	1	protein_coding	UPF1, RNA helicase and ATPase [Source:HGNC Symbol;Acc:HGNC:9962]	DNA helicase(PC00011)	RNA helicase(PC00032)	endoribonuclease(PC00094)	ENSG00000005007
ENSG00000005020	ENSG00000005020	6.6826	0.456674	0.594935	0.767603	0.442723	0.633499	ENSG00000005020	8935	SKAP2	7	26667062	26995239	-1	protein_coding	src kinase associated phosphoprotein 2 [Source:HGNC Symbol;Acc:HGNC:15687]	NA	NA	NA	ENSG00000005020
ENSG00000005022	ENSG00000005022	8937.14	-0.444174	0.119171	-3.72719	0.000193625	0.00190387	ENSG00000005022	292	SLC25A5	X	119468400	119471319	1	protein_coding	solute carrier family 25 member 5 [Source:HGNC Symbol;Acc:HGNC:10991]	NA	NA	NA	ENSG00000005022
ENSG00000005059	ENSG00000005059	237.009	-1.35405	0.26096	-5.18875	2.11715e-07	5.23183e-06	ENSG00000005059	55013	MCUB	4	109560205	109688726	1	protein_coding	mitochondrial calcium uniporter dominant negative beta subunit [Source:HGNC Symbol;Acc:HGNC:26076]	NA	NA	NA	ENSG00000005059
ENSG00000005073	ENSG00000005073	199.34	0.274979	0.201699	1.36331	0.172785	0.346155	ENSG00000005073	3207	HOXA11	7	27181510	27185223	-1	protein_coding	homeobox A11 [Source:HGNC Symbol;Acc:HGNC:5101]	NA	NA	NA	ENSG00000005073
ENSG00000005075	ENSG00000005075	1014.77	-0.0839501	0.163451	-0.513609	0.607525	0.764907	ENSG00000005075	5439	POLR2J	7	102473118	102478907	-1	protein_coding	RNA polymerase II subunit J [Source:HGNC Symbol;Acc:HGNC:9197]	DNA-directed RNA polymerase(PC00019)	nucleotidyltransferase(PC00174)	NA	ENSG00000005075
ENSG00000005100	ENSG00000005100	1238.23	0.153513	0.251536	0.610302	0.541661	0.715797	ENSG00000005100	56919	DHX33	17	5440912	5469060	-1	protein_coding	DEAH-box helicase 33 [Source:HGNC Symbol;Acc:HGNC:16718]	RNA helicase(PC00032)	NA	NA	ENSG00000005100
ENSG00000005102	ENSG00000005102	16.1957	-0.695576	0.416356	-1.67063	0.0947951	0.229564	ENSG00000005102	4222	MEOX1	17	43640388	43661954	-1	protein_coding	mesenchyme homeobox 1 [Source:HGNC Symbol;Acc:HGNC:7013]	DNA binding protein(PC00009)	homeodomain transcription factor(PC00119)	NA	ENSG00000005102
ENSG00000005108	ENSG00000005108	13.6547	1.32963	0.913049	1.45626	0.145321	0.309043	ENSG00000005108	221981	THSD7A	7	11370357	11832198	-1	protein_coding	thrombospondin type 1 domain containing 7A [Source:HGNC Symbol;Acc:HGNC:22207]	extracellular matrix glycoprotein(PC00100)	NA	NA	ENSG00000005108
ENSG00000005156	ENSG00000005156	1330.2	-0.172697	0.130075	-1.32767	0.184287	0.361874	ENSG00000005156	3980	LIG3	17	34980494	35009743	1	protein_coding	DNA ligase 3 [Source:HGNC Symbol;Acc:HGNC:6600]	DNA ligase(PC00012)	NA	NA	ENSG00000005156
ENSG00000005175	ENSG00000005175	1555.97	0.000366818	0.165452	0.00221706	0.998231	0.999417	ENSG00000005175	79657	RPAP3	12	47661249	47706061	-1	protein_coding	RNA polymerase II associated protein 3 [Source:HGNC Symbol;Acc:HGNC:26151]	NA	NA	NA	ENSG00000005175
ENSG00000005187	ENSG00000005187	59.5719	-0.744616	0.536497	-1.38792	0.16516	0.336959	ENSG00000005187	6296	ACSM3	16	20610243	20797581	1	protein_coding	acyl-CoA synthetase medium chain family member 3 [Source:HGNC Symbol;Acc:HGNC:10522]	dehydrogenase(PC00092)	ligase(PC00142)	NA	ENSG00000005187
ENSG00000005189	ENSG00000005189	250.255	-0.817853	0.175288	-4.66578	3.07451e-06	5.50996e-05	ENSG00000005189	81691	REXO5	16	20806429	20849668	1	protein_coding	RNA exonuclease 5 [Source:HGNC Symbol;Acc:HGNC:24661]	exoribonuclease(PC00099)	NA	NA	ENSG00000005189
ENSG00000005194	ENSG00000005194	987.086	0.0792552	0.209105	0.379021	0.704672	0.832111	ENSG00000005194	57019	CIAPIN1	16	57428169	57447528	-1	protein_coding	cytokine induced apoptosis inhibitor 1 [Source:HGNC Symbol;Acc:HGNC:28050]	NA	NA	NA	ENSG00000005194
ENSG00000005206	ENSG00000005206	432.2	0.16915	0.227869	0.742312	0.457898	0.646471	ENSG00000005206	56928	SPPL2B	19	2328615	2354806	1	protein_coding	signal peptide peptidase like 2B [Source:HGNC Symbol;Acc:HGNC:30627]	aspartic protease(PC00053)	NA	NA	ENSG00000005206
ENSG00000005238	ENSG00000005238	931.936	0.298382	0.325067	0.917908	0.358667	0.556605	ENSG00000005238	80256	FAM214B	9	35104112	35116341	-1	protein_coding	family with sequence similarity 214 member B [Source:HGNC Symbol;Acc:HGNC:25666]	NA	NA	NA	ENSG00000005238
ENSG00000005243	ENSG00000005243	195.994	-0.863296	0.291783	-2.95869	0.00308946	0.0177302	ENSG00000005243	51226	COPZ2	17	48026167	48038030	-1	protein_coding	coatomer protein complex subunit zeta 2 [Source:HGNC Symbol;Acc:HGNC:19356]	vesicle coat protein(PC00235)	NA	NA	ENSG00000005243
ENSG00000005249	ENSG00000005249	591.068	-0.298247	0.336868	-0.885353	0.375966	0.574077	ENSG00000005249	5577	PRKAR2B	7	107044649	107161811	1	protein_coding	protein kinase cAMP-dependent type II regulatory subunit beta [Source:HGNC Symbol;Acc:HGNC:9392]	NA	NA	NA	ENSG00000005249
ENSG00000005302	ENSG00000005302	695.352	-0.0811532	0.182119	-0.445605	0.655882	0.799687	ENSG00000005302	10943	MSL3	X	11758159	11775753	1	protein_coding	MSL complex subunit 3 [Source:HGNC Symbol;Acc:HGNC:7370]	chromatin/chromatin-binding protein(PC00077)	transcription factor(PC00218)	NA	ENSG00000005302
ENSG00000005339	ENSG00000005339	3168.36	-1.35747	0.295703	-4.59066	4.41838e-06	7.57265e-05	ENSG00000005339	1387	CREBBP	16	3725054	3880726	-1	protein_coding	CREB binding protein [Source:HGNC Symbol;Acc:HGNC:2348]	acetyltransferase(PC00038)	chromatin/chromatin-binding protein(PC00077)	transcription cofactor(PC00217)	ENSG00000005339
ENSG00000005379	ENSG00000005379	60.1702	3.27724	0.489942	6.68902	2.24666e-11	1.29375e-09	ENSG00000005379	9256	TSPOAP1	17	58301228	58328760	-1	protein_coding	TSPO associated protein 1 [Source:HGNC Symbol;Acc:HGNC:16831]	NA	NA	NA	ENSG00000005379
ENSG00000005381	ENSG00000005381	0.418516	1.65016	2.9129	0.566501	0.571053	NA	ENSG00000005381	4353	MPO	17	58269856	58280935	-1	protein_coding	myeloperoxidase [Source:HGNC Symbol;Acc:HGNC:7218]	peroxidase(PC00180)	NA	NA	ENSG00000005381
ENSG00000005421	ENSG00000005421	0.309363	-0.463564	3.62436	-0.127902	0.898226	NA	ENSG00000005421	5444	PON1	7	95297676	95324707	-1	protein_coding	paraoxonase 1 [Source:HGNC Symbol;Acc:HGNC:9204]	NA	NA	NA	ENSG00000005421
ENSG00000005436	ENSG00000005436	630.541	0.223821	0.221632	1.00988	0.312554	0.510721	ENSG00000005436	6936	GCFC2	2	75652000	75710989	-1	protein_coding	GC-rich sequence DNA-binding factor 2 [Source:HGNC Symbol;Acc:HGNC:1317]	nucleic acid binding(PC00171)	transcription factor(PC00218)	NA	ENSG00000005436
ENSG00000005448	ENSG00000005448	960.878	-0.196664	0.198535	-0.990578	0.321892	0.520929	ENSG00000005448	84058	WDR54	2	74421678	74425755	1	protein_coding	WD repeat domain 54 [Source:HGNC Symbol;Acc:HGNC:25770]	NA	NA	NA	ENSG00000005448
ENSG00000005469	ENSG00000005469	268.857	1.12332	0.30552	3.67675	0.000236227	0.00223664	ENSG00000005469	54677	CROT	7	87345681	87399795	1	protein_coding	carnitine O-octanoyltransferase [Source:HGNC Symbol;Acc:HGNC:2366]	acetyltransferase(PC00038)	acyltransferase(PC00042)	NA	ENSG00000005469
ENSG00000005471	ENSG00000005471	113.509	0.496471	0.490608	1.01195	0.311562	0.509922	ENSG00000005471	5244	ABCB4	7	87401697	87480435	-1	protein_coding	ATP binding cassette subfamily B member 4 [Source:HGNC Symbol;Acc:HGNC:45]	cysteine protease(PC00081)	serine protease(PC00203)	NA	ENSG00000005471
ENSG00000005483	ENSG00000005483	2125.08	-0.29576	0.171982	-1.71972	0.0854842	0.213597	ENSG00000005483	55904	KMT2E	7	105014179	105114361	1	protein_coding	lysine methyltransferase 2E [Source:HGNC Symbol;Acc:HGNC:18541]	NA	NA	NA	ENSG00000005483
ENSG00000005486	ENSG00000005486	1288.91	-0.282476	0.122918	-2.29808	0.0215572	0.0798016	ENSG00000005486	57414	RHBDD2	7	75842602	75888926	1	protein_coding	rhomboid domain containing 2 [Source:HGNC Symbol;Acc:HGNC:23082]	receptor(PC00197)	NA	NA	ENSG00000005486
ENSG00000005513	ENSG00000005513	112.422	0.393781	0.634502	0.620614	0.534853	0.710482	ENSG00000005513	30812	SOX8	16	981808	986979	1	protein_coding	SRY-box 8 [Source:HGNC Symbol;Acc:HGNC:11203]	NA	NA	NA	ENSG00000005513
ENSG00000005700	ENSG00000005700	1433.66	-0.0160746	0.0851717	-0.188732	0.850303	0.920782	ENSG00000005700	25998	IBTK	6	82169983	82247754	-1	protein_coding	inhibitor of Bruton tyrosine kinase [Source:HGNC Symbol;Acc:HGNC:17853]	NA	NA	NA	ENSG00000005700
ENSG00000005801	ENSG00000005801	1250.09	1.24178	0.463822	2.67727	0.00742239	0.0352504	ENSG00000005801	7748	ZNF195	11	3339261	3379222	-1	protein_coding	zinc finger protein 195 [Source:HGNC Symbol;Acc:HGNC:12986]	NA	NA	NA	ENSG00000005801
ENSG00000005810	ENSG00000005810	1552.26	0.194167	0.16351	1.1875	0.235031	0.425811	ENSG00000005810	23077	MYCBP2	13	77044655	77327050	-1	protein_coding	MYC binding protein 2, E3 ubiquitin protein ligase [Source:HGNC Symbol;Acc:HGNC:23386]	NA	NA	NA	ENSG00000005810
ENSG00000005812	ENSG00000005812	710.959	-0.311516	0.178284	-1.74731	0.0805841	0.205091	ENSG00000005812	26224	FBXL3	13	76992598	77027195	-1	protein_coding	F-box and leucine rich repeat protein 3 [Source:HGNC Symbol;Acc:HGNC:13599]	NA	NA	NA	ENSG00000005812
ENSG00000005844	ENSG00000005844	10.1244	1.44499	0.738269	1.95727	0.0503158	0.147716	ENSG00000005844	3683	ITGAL	16	30472658	30523185	1	protein_coding	integrin subunit alpha L [Source:HGNC Symbol;Acc:HGNC:6148]	NA	NA	NA	ENSG00000005844
ENSG00000005882	ENSG00000005882	940.233	-1.03999	0.362996	-2.86502	0.00416984	0.0225339	ENSG00000005882	5164	PDK2	17	50094737	50112152	1	protein_coding	pyruvate dehydrogenase kinase 2 [Source:HGNC Symbol;Acc:HGNC:8810]	protein kinase(PC00193)	NA	NA	ENSG00000005882
ENSG00000005884	ENSG00000005884	20667.1	-0.134623	0.068518	-1.96478	0.0494403	0.145806	ENSG00000005884	3675	ITGA3	17	50055968	50090481	1	protein_coding	integrin subunit alpha 3 [Source:HGNC Symbol;Acc:HGNC:6139]	NA	NA	NA	ENSG00000005884
ENSG00000005889	ENSG00000005889	452.142	-0.500846	0.230245	-2.17528	0.0296095	0.100649	ENSG00000005889	7543	ZFX	X	24149173	24216255	1	protein_coding	zinc finger protein, X-linked [Source:HGNC Symbol;Acc:HGNC:12869]	KRAB box transcription factor(PC00029)	NA	NA	ENSG00000005889
ENSG00000005893	ENSG00000005893	4945.18	0.170498	0.159516	1.06884	0.28514	0.483107	ENSG00000005893	3920	LAMP2	X	120427827	120469365	-1	protein_coding	lysosomal associated membrane protein 2 [Source:HGNC Symbol;Acc:HGNC:6501]	membrane trafficking regulatory protein(PC00151)	NA	NA	ENSG00000005893
ENSG00000005961	ENSG00000005961	49.6844	0.653253	0.513549	1.27204	0.20336	0.387293	ENSG00000005961	3674	ITGA2B	17	44372180	44389505	-1	protein_coding	integrin subunit alpha 2b [Source:HGNC Symbol;Acc:HGNC:6138]	NA	NA	NA	ENSG00000005961
ENSG00000005981	ENSG00000005981	4.64551	1.76901	1.05765	1.67258	0.0944092	0.228893	ENSG00000005981	51666	ASB4	7	95478444	95540232	1	protein_coding	ankyrin repeat and SOCS box containing 4 [Source:HGNC Symbol;Acc:HGNC:16009]	NA	NA	NA	ENSG00000005981
ENSG00000006007	ENSG00000006007	2001.91	-0.431043	0.183421	-2.35002	0.0187723	0.0718058	ENSG00000006007	51573	GDE1	16	19501689	19522145	-1	protein_coding	glycerophosphodiester phosphodiesterase 1 [Source:HGNC Symbol;Acc:HGNC:29644]	NA	NA	NA	ENSG00000006007
ENSG00000006015	ENSG00000006015	282.449	0.115202	0.228328	0.504547	0.613877	0.769706	ENSG00000006015	55049	C19orf60	19	18588685	18592336	1	protein_coding	chromosome 19 open reading frame 60 [Source:HGNC Symbol;Acc:HGNC:26098]	NA	NA	NA	ENSG00000006015
ENSG00000006016	ENSG00000006016	288.581	-0.333017	0.794177	-0.419324	0.674979	0.813089	ENSG00000006016	9244	CRLF1	19	18572220	18607741	-1	protein_coding	cytokine receptor like factor 1 [Source:HGNC Symbol;Acc:HGNC:2364]	cytokine(PC00083)	defense/immunity protein(PC00090)	NA	ENSG00000006016
ENSG00000006025	ENSG00000006025	383.071	0.122167	0.276259	0.44222	0.65833	0.801444	ENSG00000006025	114881	OSBPL7	17	47807372	47821834	-1	protein_coding	oxysterol binding protein like 7 [Source:HGNC Symbol;Acc:HGNC:16387]	NA	NA	NA	ENSG00000006025
ENSG00000006042	ENSG00000006042	1582.96	-0.621097	0.155767	-3.98735	6.68145e-05	0.000787813	ENSG00000006042	26022	TMEM98	17	32927910	32945106	1	protein_coding	transmembrane protein 98 [Source:HGNC Symbol;Acc:HGNC:24529]	NA	NA	NA	ENSG00000006042
ENSG00000006047	ENSG00000006047	192.12	1.3487	0.238263	5.66052	1.50911e-08	4.94176e-07	ENSG00000006047	51087	YBX2	17	7288252	7294615	-1	protein_coding	Y-box binding protein 2 [Source:HGNC Symbol;Acc:HGNC:17948]	NA	NA	NA	ENSG00000006047
ENSG00000006059	ENSG00000006059	0.639072	-0.525608	2.42742	-0.216529	0.828575	NA	ENSG00000006059	3883	KRT33A	17	41346092	41350812	-1	protein_coding	keratin 33A [Source:HGNC Symbol;Acc:HGNC:6450]	NA	NA	NA	ENSG00000006059
ENSG00000006062	ENSG00000006062	830.313	1.34215	0.15236	8.80905	1.26213e-18	1.96955e-16	ENSG00000006062	9020	MAP3K14	17	45263121	45317040	-1	protein_coding	mitogen-activated protein kinase kinase kinase 14 [Source:HGNC Symbol;Acc:HGNC:6853]	NA	NA	NA	ENSG00000006062
ENSG00000006071	ENSG00000006071	39.1741	-0.427693	0.586752	-0.728916	0.466053	0.652949	ENSG00000006071	6833	ABCC8	11	17392885	17476845	-1	protein_coding	ATP binding cassette subfamily C member 8 [Source:HGNC Symbol;Acc:HGNC:59]	ATP-binding cassette (ABC) transporter(PC00003)	NA	NA	ENSG00000006071
ENSG00000006116	ENSG00000006116	0.0627571	-0.525604	4.32804	-0.121442	0.903341	NA	ENSG00000006116	10368	CACNG3	16	24255553	24362801	1	protein_coding	calcium voltage-gated channel auxiliary subunit gamma 3 [Source:HGNC Symbol;Acc:HGNC:1407]	voltage-gated calcium channel(PC00240)	NA	NA	ENSG00000006116
ENSG00000006118	ENSG00000006118	2612.6	1.45939	0.299383	4.87465	1.08999e-06	2.20616e-05	ENSG00000006118	54972	TMEM132A	11	60924463	60937159	1	protein_coding	transmembrane protein 132A [Source:HGNC Symbol;Acc:HGNC:31092]	NA	NA	NA	ENSG00000006118
ENSG00000006125	ENSG00000006125	7972.87	-0.743328	0.310453	-2.39433	0.0166506	0.0656572	ENSG00000006125	163	AP2B1	17	35578046	35726409	1	protein_coding	adaptor related protein complex 2 beta 1 subunit [Source:HGNC Symbol;Acc:HGNC:563]	membrane traffic protein(PC00150)	NA	NA	ENSG00000006125
ENSG00000006128	ENSG00000006128	1.4346	0.087512	1.37736	0.0635362	0.94934	NA	ENSG00000006128	6863	TAC1	7	97731908	97740472	1	protein_coding	tachykinin precursor 1 [Source:HGNC Symbol;Acc:HGNC:11517]	NA	NA	NA	ENSG00000006128
ENSG00000006194	ENSG00000006194	1035.96	-0.110817	0.0795966	-1.39223	0.163852	0.335101	ENSG00000006194	10127	ZNF263	16	3263800	3301401	1	protein_coding	zinc finger protein 263 [Source:HGNC Symbol;Acc:HGNC:13056]	NA	NA	NA	ENSG00000006194
ENSG00000006210	ENSG00000006210	386.428	-0.837597	0.43546	-1.92348	0.0544201	0.156459	ENSG00000006210	6376	CX3CL1	16	57372458	57385048	1	protein_coding	C-X3-C motif chemokine ligand 1 [Source:HGNC Symbol;Acc:HGNC:10647]	chemokine(PC00074)	NA	NA	ENSG00000006210
ENSG00000006282	ENSG00000006282	3146.51	-0.175451	0.137502	-1.27599	0.20196	0.385439	ENSG00000006282	64847	SPATA20	17	50543058	50555852	1	protein_coding	spermatogenesis associated 20 [Source:HGNC Symbol;Acc:HGNC:26125]	NA	NA	NA	ENSG00000006282
ENSG00000006283	ENSG00000006283	388.971	-1.20119	0.400665	-2.99799	0.00271768	0.0160408	ENSG00000006283	8913	CACNA1G	17	50561068	50627474	1	protein_coding	calcium voltage-gated channel subunit alpha1 G [Source:HGNC Symbol;Acc:HGNC:1394]	voltage-gated calcium channel(PC00240)	voltage-gated sodium channel(PC00243)	NA	ENSG00000006283
ENSG00000006327	ENSG00000006327	4142.94	0.80126	0.284523	2.81616	0.00486022	0.0254382	ENSG00000006327	51330	TNFRSF12A	16	3018445	3022383	1	protein_coding	TNF receptor superfamily member 12A [Source:HGNC Symbol;Acc:HGNC:18152]	NA	NA	NA	ENSG00000006327
ENSG00000006377	ENSG00000006377	0.0820095	0	4.32804	0	1	NA	ENSG00000006377	1750	DLX6	7	97005548	97011039	1	protein_coding	distal-less homeobox 6 [Source:HGNC Symbol;Acc:HGNC:2919]	DNA binding protein(PC00009)	homeodomain transcription factor(PC00119)	NA	ENSG00000006377
ENSG00000006432	ENSG00000006432	1728.75	-0.535228	0.389069	-1.37567	0.168925	0.341826	ENSG00000006432	4293	MAP3K9	14	70722526	70809534	-1	protein_coding	mitogen-activated protein kinase kinase kinase 9 [Source:HGNC Symbol;Acc:HGNC:6861]	NA	NA	NA	ENSG00000006432
ENSG00000006451	ENSG00000006451	1614.26	0.342661	0.154371	2.21972	0.0264375	0.0928228	ENSG00000006451	5898	RALA	7	39623483	39708124	1	protein_coding	RAS like proto-oncogene A [Source:HGNC Symbol;Acc:HGNC:9839]	small GTPase(PC00208)	NA	NA	ENSG00000006451
ENSG00000006453	ENSG00000006453	1351.77	-0.144376	0.202637	-0.712483	0.476166	0.661532	ENSG00000006453	55971	BAIAP2L1	7	98291651	98401068	-1	protein_coding	BAI1 associated protein 2 like 1 [Source:HGNC Symbol;Acc:HGNC:21649]	receptor(PC00197)	NA	NA	ENSG00000006453
ENSG00000006459	ENSG00000006459	483.962	1.84976	0.231857	7.97803	1.48687e-15	1.58603e-13	ENSG00000006459	80853	KDM7A	7	140084746	140177035	-1	protein_coding	lysine demethylase 7A [Source:HGNC Symbol;Acc:HGNC:22224]	NA	NA	NA	ENSG00000006459
ENSG00000006468	ENSG00000006468	143.686	-0.941664	0.62235	-1.51308	0.13026	0.286595	ENSG00000006468	2115	ETV1	7	13891228	13991425	-1	protein_coding	ETS variant 1 [Source:HGNC Symbol;Acc:HGNC:3490]	nucleic acid binding(PC00171)	signaling molecule(PC00207)	winged helix/forkhead transcription factor(PC00246)	ENSG00000006468
ENSG00000006530	ENSG00000006530	570.665	0.225257	0.121184	1.8588	0.0630555	0.173756	ENSG00000006530	55750	AGK	7	141551189	141655244	1	protein_coding	acylglycerol kinase [Source:HGNC Symbol;Acc:HGNC:21869]	NA	NA	NA	ENSG00000006530
ENSG00000006534	ENSG00000006534	1005.56	0.0028254	0.174385	0.0162021	0.987073	0.9945	ENSG00000006534	221	ALDH3B1	11	68008578	68029282	1	protein_coding	aldehyde dehydrogenase 3 family member B1 [Source:HGNC Symbol;Acc:HGNC:410]	NA	NA	NA	ENSG00000006534
ENSG00000006555	ENSG00000006555	1.92868	2.35591	1.40036	1.68236	0.092499	0.225574	ENSG00000006555	55001	TTC22	1	54779712	54801267	-1	protein_coding	tetratricopeptide repeat domain 22 [Source:HGNC Symbol;Acc:HGNC:26067]	NA	NA	NA	ENSG00000006555
ENSG00000006576	ENSG00000006576	1928.75	-0.693418	0.154852	-4.47795	7.53649e-06	0.000120737	ENSG00000006576	57157	PHTF2	7	77798792	77957503	1	protein_coding	putative homeodomain transcription factor 2 [Source:HGNC Symbol;Acc:HGNC:13411]	homeodomain transcription factor(PC00119)	nucleic acid binding(PC00171)	NA	ENSG00000006576
ENSG00000006606	ENSG00000006606	201.451	0.370491	0.353583	1.04782	0.294722	0.493481	ENSG00000006606	10344	CCL26	7	75769533	75789896	-1	protein_coding	C-C motif chemokine ligand 26 [Source:HGNC Symbol;Acc:HGNC:10625]	chemokine(PC00074)	NA	NA	ENSG00000006606
ENSG00000006607	ENSG00000006607	951.906	0.118315	0.256008	0.462154	0.643971	0.791808	ENSG00000006607	9855	FARP2	2	241356243	241494841	1	protein_coding	FERM, ARH/RhoGEF and pleckstrin domain protein 2 [Source:HGNC Symbol;Acc:HGNC:16460]	NA	NA	NA	ENSG00000006607
ENSG00000006611	ENSG00000006611	78.2185	0.767329	0.543294	1.41236	0.157843	0.32691	ENSG00000006611	10083	USH1C	11	17493895	17544416	-1	protein_coding	USH1 protein network component harmonin [Source:HGNC Symbol;Acc:HGNC:12597]	cytoskeletal protein(PC00085)	NA	NA	ENSG00000006611
ENSG00000006625	ENSG00000006625	1588.98	-0.38286	0.160154	-2.39057	0.0168221	0.0661477	ENSG00000006625	79017	GGCT	7	30496621	30504844	-1	protein_coding	gamma-glutamylcyclotransferase [Source:HGNC Symbol;Acc:HGNC:21705]	NA	NA	NA	ENSG00000006625
ENSG00000006634	ENSG00000006634	1381.89	-0.216568	0.154674	-1.40016	0.161466	0.332	ENSG00000006634	10926	DBF4	7	87876216	87909541	1	protein_coding	DBF4 zinc finger [Source:HGNC Symbol;Acc:HGNC:17364]	kinase activator(PC00138)	NA	NA	ENSG00000006634
ENSG00000006638	ENSG00000006638	48.2164	1.14924	0.308416	3.72627	0.000194336	0.00191011	ENSG00000006638	6915	TBXA2R	19	3594506	3606840	-1	protein_coding	thromboxane A2 receptor [Source:HGNC Symbol;Acc:HGNC:11608]	G-protein coupled receptor(PC00021)	NA	NA	ENSG00000006638
ENSG00000006652	ENSG00000006652	1066.65	1.1584	0.156593	7.39752	1.38749e-13	1.13882e-11	ENSG00000006652	3475	IFRD1	7	112422968	112481017	1	protein_coding	interferon related developmental regulator 1 [Source:HGNC Symbol;Acc:HGNC:5456]	NA	NA	NA	ENSG00000006652
ENSG00000006659	ENSG00000006659	0.198618	0.909724	4.32203	0.210485	0.833289	NA	ENSG00000006659	56891	LGALS14	19	39704306	39709444	1	protein_coding	galectin 14 [Source:HGNC Symbol;Acc:HGNC:30054]	cell adhesion molecule(PC00069)	signaling molecule(PC00207)	NA	ENSG00000006659
ENSG00000006695	ENSG00000006695	316.954	-0.0290903	0.164209	-0.177154	0.859388	0.925738	ENSG00000006695	1352	COX10	17	14069496	14208677	1	protein_coding	COX10, heme A:farnesyltransferase cytochrome c oxidase assembly factor [Source:HGNC Symbol;Acc:HGNC:2260]	acyltransferase(PC00042)	NA	NA	ENSG00000006695
ENSG00000006704	ENSG00000006704	898.108	0.371587	0.194952	1.90604	0.0566446	0.161095	ENSG00000006704	9569	GTF2IRD1	7	74453790	74602604	1	protein_coding	GTF2I repeat domain containing 1 [Source:HGNC Symbol;Acc:HGNC:4661]	NA	NA	NA	ENSG00000006704
ENSG00000006712	ENSG00000006712	2260.87	-0.100128	0.142663	-0.70185	0.482773	0.666985	ENSG00000006712	54623	PAF1	19	39385852	39391195	-1	protein_coding	PAF1 homolog, Paf1/RNA polymerase II complex component [Source:HGNC Symbol;Acc:HGNC:25459]	NA	NA	NA	ENSG00000006712
ENSG00000006715	ENSG00000006715	1885.22	-0.913134	0.149576	-6.10483	1.02911e-09	4.336e-08	ENSG00000006715	27072	VPS41	7	38722963	38932394	-1	protein_coding	VPS41, HOPS complex subunit [Source:HGNC Symbol;Acc:HGNC:12713]	membrane traffic protein(PC00150)	NA	NA	ENSG00000006715
ENSG00000006740	ENSG00000006740	184.087	0.72332	0.357006	2.02607	0.0427576	0.131486	ENSG00000006740	9912	ARHGAP44	17	12789539	12991643	1	protein_coding	Rho GTPase activating protein 44 [Source:HGNC Symbol;Acc:HGNC:29096]	NA	NA	NA	ENSG00000006740
ENSG00000006744	ENSG00000006744	1329.18	0.187449	0.178455	1.0504	0.293535	0.492163	ENSG00000006744	60528	ELAC2	17	12992391	13018187	-1	protein_coding	elaC ribonuclease Z 2 [Source:HGNC Symbol;Acc:HGNC:14198]	NA	NA	NA	ENSG00000006744
ENSG00000006747	ENSG00000006747	85.6996	1.27911	0.545904	2.3431	0.0191242	0.0728211	ENSG00000006747	85477	SCIN	7	12570577	12660179	1	protein_coding	scinderin [Source:HGNC Symbol;Acc:HGNC:21695]	non-motor actin binding protein(PC00165)	NA	NA	ENSG00000006747
ENSG00000006756	ENSG00000006756	12.7908	2.39424	0.626931	3.81898	0.000134005	0.00140101	ENSG00000006756	414	ARSD	X	2903970	2929351	-1	protein_coding	arylsulfatase D [Source:HGNC Symbol;Acc:HGNC:717]	hydrolase(PC00121)	NA	NA	ENSG00000006756
ENSG00000006757	ENSG00000006757	155.924	-0.0849536	0.182833	-0.464651	0.642181	0.790261	ENSG00000006757	8228	PNPLA4	X	7898247	7927739	-1	protein_coding	patatin like phospholipase domain containing 4 [Source:HGNC Symbol;Acc:HGNC:24887]	NA	NA	NA	ENSG00000006757
ENSG00000006788	ENSG00000006788	0.227233	0	3.85774	0	1	NA	ENSG00000006788	8735	MYH13	17	10300865	10373130	-1	protein_coding	myosin heavy chain 13 [Source:HGNC Symbol;Acc:HGNC:7571]	NA	NA	NA	ENSG00000006788
ENSG00000006831	ENSG00000006831	4005.45	-0.865095	0.20055	-4.31361	1.60613e-05	0.000231093	ENSG00000006831	79602	ADIPOR2	12	1688574	1788678	1	protein_coding	adiponectin receptor 2 [Source:HGNC Symbol;Acc:HGNC:24041]	receptor(PC00197)	NA	NA	ENSG00000006831
ENSG00000006837	ENSG00000006837	34.6491	-0.941464	0.271685	-3.46528	0.000529688	0.00434898	ENSG00000006837	51265	CDKL3	5	134286350	134371047	-1	protein_coding	cyclin dependent kinase like 3 [Source:HGNC Symbol;Acc:HGNC:15483]	non-receptor serine/threonine protein kinase(PC00167)	non-receptor tyrosine protein kinase(PC00168)	NA	ENSG00000006837
ENSG00000007001	ENSG00000007001	0	NA	NA	NA	NA	NA	ENSG00000007001	151531	UPP2	2	157876702	158136154	1	protein_coding	uridine phosphorylase 2 [Source:HGNC Symbol;Acc:HGNC:23061]	phosphorylase(PC00187)	NA	NA	ENSG00000007001
ENSG00000007038	ENSG00000007038	0.183913	0.917077	4.32804	0.211892	0.832191	NA	ENSG00000007038	10942	PRSS21	16	2817180	2826304	1	protein_coding	protease, serine 21 [Source:HGNC Symbol;Acc:HGNC:9485]	annexin(PC00050)	calmodulin(PC00061)	peptide hormone(PC00179)	ENSG00000007038
ENSG00000007047	ENSG00000007047	782.954	-0.213629	0.475833	-0.448959	0.653461	0.797851	ENSG00000007047	57787	MARK4	19	45079288	45305283	1	protein_coding	microtubule affinity regulating kinase 4 [Source:HGNC Symbol;Acc:HGNC:13538]	non-receptor serine/threonine protein kinase(PC00167)	NA	NA	ENSG00000007047
ENSG00000007062	ENSG00000007062	1.742	-1.44441	1.13706	-1.2703	0.203979	NA	ENSG00000007062	8842	PROM1	4	15963076	16084378	-1	protein_coding	prominin 1 [Source:HGNC Symbol;Acc:HGNC:9454]	membrane traffic protein(PC00150)	NA	NA	ENSG00000007062
ENSG00000007080	ENSG00000007080	899.61	0.3618	0.163362	2.21471	0.0267796	0.0937139	ENSG00000007080	115098	CCDC124	19	17933016	17943991	1	protein_coding	coiled-coil domain containing 124 [Source:HGNC Symbol;Acc:HGNC:25171]	NA	NA	NA	ENSG00000007080
ENSG00000007129	ENSG00000007129	1.81362	1.76655	1.74956	1.00971	0.312635	NA	ENSG00000007129	90273	CEACAM21	19	41549518	41586844	1	protein_coding	carcinoembryonic antigen related cell adhesion molecule 21 [Source:HGNC Symbol;Acc:HGNC:28834]	cell adhesion molecule(PC00069)	immunoglobulin receptor superfamily(PC00124)	protein kinase(PC00193)	ENSG00000007129
ENSG00000007168	ENSG00000007168	2005.24	-0.0688065	0.102182	-0.67337	0.500712	0.681674	ENSG00000007168	5048	PAFAH1B1	17	2593210	2685615	1	protein_coding	platelet activating factor acetylhydrolase 1b regulatory subunit 1 [Source:HGNC Symbol;Acc:HGNC:8574]	NA	NA	NA	ENSG00000007168
ENSG00000007171	ENSG00000007171	42.3565	1.00468	0.36301	2.76764	0.00564646	0.0285428	ENSG00000007171	4843	NOS2	17	27756766	27800499	-1	protein_coding	nitric oxide synthase 2 [Source:HGNC Symbol;Acc:HGNC:7873]	NA	NA	NA	ENSG00000007171
ENSG00000007174	ENSG00000007174	7.1818	0.0462508	0.825667	0.0560163	0.955329	0.97788	ENSG00000007174	1770	DNAH9	17	11598431	11969748	1	protein_coding	dynein axonemal heavy chain 9 [Source:HGNC Symbol;Acc:HGNC:2953]	hydrolase(PC00121)	microtubule binding motor protein(PC00156)	NA	ENSG00000007174
ENSG00000007202	ENSG00000007202	7560.51	-0.295763	0.175674	-1.68359	0.0922603	0.225172	ENSG00000007202	9703	KIAA0100	17	28614440	28645454	-1	protein_coding	KIAA0100 [Source:HGNC Symbol;Acc:HGNC:28960]	NA	NA	NA	ENSG00000007202
ENSG00000007216	ENSG00000007216	0.197271	0	4.32804	0	1	NA	ENSG00000007216	9058	SLC13A2	17	28473293	28497781	1	protein_coding	solute carrier family 13 member 2 [Source:HGNC Symbol;Acc:HGNC:10917]	cation transporter(PC00068)	NA	NA	ENSG00000007216
ENSG00000007237	ENSG00000007237	263.013	-0.0764421	0.488217	-0.156574	0.875581	0.934942	ENSG00000007237	8522	GAS7	17	9910609	10198551	-1	protein_coding	growth arrest specific 7 [Source:HGNC Symbol;Acc:HGNC:4169]	NA	NA	NA	ENSG00000007237
ENSG00000007255	ENSG00000007255	130.985	-0.700551	0.35224	-1.98884	0.0467184	0.140033	ENSG00000007255	79090	TRAPPC6A	19	45162928	45178237	-1	protein_coding	trafficking protein particle complex 6A [Source:HGNC Symbol;Acc:HGNC:23069]	NA	NA	NA	ENSG00000007255
ENSG00000007264	ENSG00000007264	20.9289	0.0765448	0.463233	0.16524	0.868755	0.931467	ENSG00000007264	4145	MATK	19	3777970	3802129	-1	protein_coding	megakaryocyte-associated tyrosine kinase [Source:HGNC Symbol;Acc:HGNC:6906]	NA	NA	NA	ENSG00000007264
ENSG00000007306	ENSG00000007306	0	NA	NA	NA	NA	NA	ENSG00000007306	1087	CEACAM7	19	41673307	41706976	-1	protein_coding	carcinoembryonic antigen related cell adhesion molecule 7 [Source:HGNC Symbol;Acc:HGNC:1819]	cell adhesion molecule(PC00069)	immunoglobulin receptor superfamily(PC00124)	protein kinase(PC00193)	ENSG00000007306
ENSG00000007312	ENSG00000007312	2.48689	3.65849	1.44932	2.52428	0.0115937	0.0496676	ENSG00000007312	974	CD79B	17	63928740	63932354	-1	protein_coding	CD79b molecule [Source:HGNC Symbol;Acc:HGNC:1699]	immunoglobulin receptor superfamily(PC00124)	NA	NA	ENSG00000007312
ENSG00000007314	ENSG00000007314	9.42496	-0.480348	0.633397	-0.758367	0.448231	0.638342	ENSG00000007314	6329	SCN4A	17	63938554	63972918	-1	protein_coding	sodium voltage-gated channel alpha subunit 4 [Source:HGNC Symbol;Acc:HGNC:10591]	voltage-gated calcium channel(PC00240)	voltage-gated sodium channel(PC00243)	NA	ENSG00000007314
ENSG00000007341	ENSG00000007341	473.347	0.0588165	0.171185	0.343585	0.731159	0.849512	ENSG00000007341	54879	ST7L	1	112523518	112620825	-1	protein_coding	suppression of tumorigenicity 7 like [Source:HGNC Symbol;Acc:HGNC:18441]	NA	NA	NA	ENSG00000007341
ENSG00000007350	ENSG00000007350	5.166	0.230187	0.739764	0.311163	0.755677	0.864764	ENSG00000007350	8277	TKTL1	X	154295671	154330350	1	protein_coding	transketolase like 1 [Source:HGNC Symbol;Acc:HGNC:11835]	dehydrogenase(PC00092)	lyase(PC00144)	transketolase(PC00221)	ENSG00000007350
ENSG00000007372	ENSG00000007372	0.453654	0.886015	4.20504	0.210703	0.833119	NA	ENSG00000007372	5080	PAX6	11	31784779	31818062	-1	protein_coding	paired box 6 [Source:HGNC Symbol;Acc:HGNC:8620]	NA	NA	NA	ENSG00000007372
ENSG00000007376	ENSG00000007376	438.325	-0.212489	0.22278	-0.953808	0.340181	0.538766	ENSG00000007376	113000	RPUSD1	16	784974	788397	-1	protein_coding	RNA pseudouridylate synthase domain containing 1 [Source:HGNC Symbol;Acc:HGNC:14173]	NA	NA	NA	ENSG00000007376
ENSG00000007384	ENSG00000007384	1028.78	0.634481	0.38064	1.66688	0.0955385	0.230922	ENSG00000007384	64285	RHBDF1	16	58059	76355	-1	protein_coding	rhomboid 5 homolog 1 [Source:HGNC Symbol;Acc:HGNC:20561]	serine protease(PC00203)	NA	NA	ENSG00000007384
ENSG00000007392	ENSG00000007392	983.772	0.41972	0.340909	1.23118	0.218257	0.405641	ENSG00000007392	55692	LUC7L	16	188969	229463	-1	protein_coding	LUC7 like [Source:HGNC Symbol;Acc:HGNC:6723]	NA	NA	NA	ENSG00000007392
ENSG00000007402	ENSG00000007402	202.609	-0.175868	0.616249	-0.285385	0.775349	0.878123	ENSG00000007402	9254	CACNA2D2	3	50362799	50504244	-1	protein_coding	calcium voltage-gated channel auxiliary subunit alpha2delta 2 [Source:HGNC Symbol;Acc:HGNC:1400]	NA	NA	NA	ENSG00000007402
ENSG00000007516	ENSG00000007516	381.889	0.675004	0.540279	1.24936	0.211532	0.397439	ENSG00000007516	8938	BAIAP3	16	1333601	1349441	1	protein_coding	BAI1 associated protein 3 [Source:HGNC Symbol;Acc:HGNC:948]	NA	NA	NA	ENSG00000007516
ENSG00000007520	ENSG00000007520	731.223	-0.231183	0.178582	-1.29455	0.195476	0.376892	ENSG00000007520	115939	TSR3	16	1349240	1351911	-1	protein_coding	TSR3, acp transferase ribosome maturation factor [Source:HGNC Symbol;Acc:HGNC:14175]	NA	NA	NA	ENSG00000007520
ENSG00000007541	ENSG00000007541	579.474	-0.302683	0.22043	-1.37315	0.169705	0.342745	ENSG00000007541	9091	PIGQ	16	566995	584136	1	protein_coding	phosphatidylinositol glycan anchor biosynthesis class Q [Source:HGNC Symbol;Acc:HGNC:14135]	glycosyltransferase(PC00111)	NA	NA	ENSG00000007541
ENSG00000007545	ENSG00000007545	1008.24	0.22683	0.138613	1.63642	0.101751	0.24171	ENSG00000007545	57585	CRAMP1	16	1612325	1677908	1	protein_coding	cramped chromatin regulator homolog 1 [Source:HGNC Symbol;Acc:HGNC:14122]	NA	NA	NA	ENSG00000007545
ENSG00000007866	ENSG00000007866	1278.09	1.01045	0.0749032	13.4901	1.78914e-41	2.15378e-38	ENSG00000007866	7005	TEAD3	6	35473597	35497076	-1	protein_coding	TEA domain transcription factor 3 [Source:HGNC Symbol;Acc:HGNC:11716]	transcription factor(PC00218)	NA	NA	ENSG00000007866
ENSG00000007908	ENSG00000007908	0.429067	2.50514	2.76	0.907661	0.364057	NA	ENSG00000007908	6401	SELE	1	169722641	169764705	-1	protein_coding	selectin E [Source:HGNC Symbol;Acc:HGNC:10718]	NA	NA	NA	ENSG00000007908
ENSG00000007923	ENSG00000007923	999.402	0.169761	0.214485	0.791483	0.428662	0.621649	ENSG00000007923	55735	DNAJC11	1	6634168	6701924	-1	protein_coding	DnaJ heat shock protein family (Hsp40) member C11 [Source:HGNC Symbol;Acc:HGNC:25570]	NA	NA	NA	ENSG00000007923
ENSG00000007933	ENSG00000007933	5.0897	1.00061	0.645767	1.54949	0.121263	0.272637	ENSG00000007933	2328	FMO3	1	171090877	171117819	1	protein_coding	flavin containing monooxygenase 3 [Source:HGNC Symbol;Acc:HGNC:3771]	oxygenase(PC00177)	NA	NA	ENSG00000007933
ENSG00000007944	ENSG00000007944	357.122	-0.0502718	0.219545	-0.228982	0.818883	0.903911	ENSG00000007944	29116	MYLIP	6	16129125	16148248	1	protein_coding	myosin regulatory light chain interacting protein [Source:HGNC Symbol;Acc:HGNC:21155]	NA	NA	NA	ENSG00000007944
ENSG00000007952	ENSG00000007952	0	NA	NA	NA	NA	NA	ENSG00000007952	27035	NOX1	X	100843324	100874345	-1	protein_coding	NADPH oxidase 1 [Source:HGNC Symbol;Acc:HGNC:7889]	oxidase(PC00175)	NA	NA	ENSG00000007952
ENSG00000007968	ENSG00000007968	534.295	-0.705805	0.40399	-1.74708	0.0806227	0.205106	ENSG00000007968	1870	E2F2	1	23506430	23531220	-1	protein_coding	E2F transcription factor 2 [Source:HGNC Symbol;Acc:HGNC:3114]	nucleic acid binding(PC00171)	transcription factor(PC00218)	NA	ENSG00000007968
ENSG00000008018	ENSG00000008018	3789.39	0.0508699	0.1218	0.41765	0.676203	0.813942	ENSG00000008018	5689	PSMB1	6	170535117	170553341	-1	protein_coding	proteasome subunit beta 1 [Source:HGNC Symbol;Acc:HGNC:9537]	NA	NA	NA	ENSG00000008018
ENSG00000008056	ENSG00000008056	52.4286	0.431445	0.532892	0.809629	0.418153	0.612665	ENSG00000008056	6853	SYN1	X	47571898	47619943	-1	protein_coding	synapsin I [Source:HGNC Symbol;Acc:HGNC:11494]	membrane trafficking regulatory protein(PC00151)	non-motor actin binding protein(PC00165)	NA	ENSG00000008056
ENSG00000008083	ENSG00000008083	842.326	-0.155474	0.15219	-1.02158	0.30698	0.505237	ENSG00000008083	3720	JARID2	6	15246296	15522040	1	protein_coding	jumonji and AT-rich interaction domain containing 2 [Source:HGNC Symbol;Acc:HGNC:6196]	zinc finger transcription factor(PC00244)	NA	NA	ENSG00000008083
ENSG00000008086	ENSG00000008086	266.831	-0.0203104	0.303432	-0.0669357	0.946633	0.973732	ENSG00000008086	6792	CDKL5	X	18425583	18653629	1	protein_coding	cyclin dependent kinase like 5 [Source:HGNC Symbol;Acc:HGNC:11411]	non-receptor serine/threonine protein kinase(PC00167)	non-receptor tyrosine protein kinase(PC00168)	NA	ENSG00000008086
ENSG00000008118	ENSG00000008118	10.5744	-1.75039	0.638344	-2.74209	0.006105	0.0303509	ENSG00000008118	57172	CAMK1G	1	209583717	209613938	1	protein_coding	calcium/calmodulin dependent protein kinase IG [Source:HGNC Symbol;Acc:HGNC:14585]	non-receptor serine/threonine protein kinase(PC00167)	NA	NA	ENSG00000008118
ENSG00000008128	ENSG00000008128	739.88	1.13291	0.360803	3.13997	0.00168965	0.010958	ENSG00000008128	728642	CDK11A	1	1702730	1724324	-1	protein_coding	cyclin dependent kinase 11A [Source:HGNC Symbol;Acc:HGNC:1730]	non-receptor serine/threonine protein kinase(PC00167)	non-receptor tyrosine protein kinase(PC00168)	NA	ENSG00000008128
ENSG00000008130	ENSG00000008130	744.125	0.36766	0.226152	1.62572	0.104009	0.24543	ENSG00000008130	65220	NADK	1	1751232	1780457	-1	protein_coding	NAD kinase [Source:HGNC Symbol;Acc:HGNC:29831]	nucleotide kinase(PC00172)	NA	NA	ENSG00000008130
ENSG00000008196	ENSG00000008196	0.31678	0.874817	2.97791	0.293769	0.768935	NA	ENSG00000008196	7021	TFAP2B	6	50818723	50847613	1	protein_coding	transcription factor AP-2 beta [Source:HGNC Symbol;Acc:HGNC:11743]	transcription factor(PC00218)	NA	NA	ENSG00000008196
ENSG00000008197	ENSG00000008197	0.247699	-0.525605	3.77998	-0.13905	0.889411	NA	ENSG00000008197	83741	TFAP2D	6	50713828	50772988	1	protein_coding	transcription factor AP-2 delta [Source:HGNC Symbol;Acc:HGNC:15581]	transcription factor(PC00218)	NA	NA	ENSG00000008197
ENSG00000008226	ENSG00000008226	7.48126	-0.970206	0.833824	-1.16356	0.244602	0.436875	ENSG00000008226	9940	DLEC1	3	38039205	38124025	1	protein_coding	deleted in lung and esophageal cancer 1 [Source:HGNC Symbol;Acc:HGNC:2899]	NA	NA	NA	ENSG00000008226
ENSG00000008256	ENSG00000008256	4792.27	-1.29524	0.190963	-6.78267	1.17972e-11	7.10077e-10	ENSG00000008256	9265	CYTH3	7	6161776	6272644	-1	protein_coding	cytohesin 3 [Source:HGNC Symbol;Acc:HGNC:9504]	NA	NA	NA	ENSG00000008256
ENSG00000008277	ENSG00000008277	233.712	-0.240918	0.341567	-0.705333	0.480603	0.665201	ENSG00000008277	53616	ADAM22	7	87934143	88202889	1	protein_coding	ADAM metallopeptidase domain 22 [Source:HGNC Symbol;Acc:HGNC:201]	metalloprotease(PC00153)	NA	NA	ENSG00000008277
ENSG00000008282	ENSG00000008282	2335.3	0.196001	0.146257	1.34011	0.180209	0.356192	ENSG00000008282	6856	SYPL1	7	106090503	106112576	-1	protein_coding	synaptophysin like 1 [Source:HGNC Symbol;Acc:HGNC:11507]	membrane trafficking regulatory protein(PC00151)	NA	NA	ENSG00000008282
ENSG00000008283	ENSG00000008283	1182.13	0.122276	0.125439	0.974786	0.329667	0.528644	ENSG00000008283	1534	CYB561	17	63432304	63446378	-1	protein_coding	cytochrome b561 [Source:HGNC Symbol;Acc:HGNC:2571]	reductase(PC00198)	NA	NA	ENSG00000008283
ENSG00000008294	ENSG00000008294	3482.6	-0.180675	0.18078	-0.999418	0.317592	0.516091	ENSG00000008294	9043	SPAG9	17	50962174	51120865	-1	protein_coding	sperm associated antigen 9 [Source:HGNC Symbol;Acc:HGNC:14524]	kinase modulator(PC00140)	NA	NA	ENSG00000008294
ENSG00000008300	ENSG00000008300	1268.55	-0.484328	0.266525	-1.81719	0.0691873	0.185065	ENSG00000008300	1951	CELSR3	3	48636469	48662915	-1	protein_coding	cadherin EGF LAG seven-pass G-type receptor 3 [Source:HGNC Symbol;Acc:HGNC:3230]	G-protein coupled receptor(PC00021)	cadherin(PC00057)	NA	ENSG00000008300
ENSG00000008311	ENSG00000008311	542.565	-0.214129	0.190691	-1.12291	0.261474	0.455863	ENSG00000008311	10157	AASS	7	122075647	122144280	-1	protein_coding	aminoadipate-semialdehyde synthase [Source:HGNC Symbol;Acc:HGNC:17366]	NA	NA	NA	ENSG00000008311
ENSG00000008323	ENSG00000008323	1.71292	0.432232	1.10687	0.390498	0.696168	NA	ENSG00000008323	55200	PLEKHG6	12	6310436	6328506	1	protein_coding	pleckstrin homology and RhoGEF domain containing G6 [Source:HGNC Symbol;Acc:HGNC:25562]	NA	NA	NA	ENSG00000008323
ENSG00000008324	ENSG00000008324	334.992	-0.00148973	0.20631	-0.00722082	0.994239	0.997605	ENSG00000008324	51188	SS18L2	3	42581840	42595114	1	protein_coding	SS18 like 2 [Source:HGNC Symbol;Acc:HGNC:15593]	chromatin/chromatin-binding protein(PC00077)	NA	NA	ENSG00000008324
ENSG00000008382	ENSG00000008382	212.514	-0.0193629	0.259149	-0.0747173	0.94044	0.970304	ENSG00000008382	84954	MPND	19	4343527	4360086	1	protein_coding	MPN domain containing [Source:HGNC Symbol;Acc:HGNC:25934]	chromatin/chromatin-binding protein(PC00077)	metalloprotease(PC00153)	transcription cofactor(PC00217)	ENSG00000008382
ENSG00000008394	ENSG00000008394	506.912	-0.133617	0.249028	-0.536555	0.591575	0.753177	ENSG00000008394	4257	MGST1	12	16347142	16609259	1	protein_coding	microsomal glutathione S-transferase 1 [Source:HGNC Symbol;Acc:HGNC:7061]	NA	NA	NA	ENSG00000008394
ENSG00000008405	ENSG00000008405	1164.35	0.450894	0.0815805	5.52699	3.2578e-08	9.97062e-07	ENSG00000008405	1407	CRY1	12	106991364	107093829	-1	protein_coding	cryptochrome circadian clock 1 [Source:HGNC Symbol;Acc:HGNC:2384]	DNA photolyase(PC00014)	lyase(PC00144)	NA	ENSG00000008405
ENSG00000008438	ENSG00000008438	0.127883	0.917077	4.32804	0.211892	0.832191	NA	ENSG00000008438	8993	PGLYRP1	19	46019153	46023065	-1	protein_coding	peptidoglycan recognition protein 1 [Source:HGNC Symbol;Acc:HGNC:8904]	NA	NA	NA	ENSG00000008438
ENSG00000008441	ENSG00000008441	1027.16	0.252159	0.412571	0.611189	0.541074	0.71532	ENSG00000008441	4784	NFIX	19	12995608	13098796	1	protein_coding	nuclear factor I X [Source:HGNC Symbol;Acc:HGNC:7788]	nucleic acid binding(PC00171)	transcription factor(PC00218)	NA	ENSG00000008441
ENSG00000008513	ENSG00000008513	2075.19	-0.604883	0.212216	-2.85032	0.00436756	0.0233627	ENSG00000008513	6482	ST3GAL1	8	133454848	133571940	-1	protein_coding	ST3 beta-galactoside alpha-2,3-sialyltransferase 1 [Source:HGNC Symbol;Acc:HGNC:10862]	NA	NA	NA	ENSG00000008513
ENSG00000008516	ENSG00000008516	17.5017	0.717201	0.381769	1.87863	0.0602956	0.168409	ENSG00000008516	64386	MMP25	16	3046681	3060726	1	protein_coding	matrix metallopeptidase 25 [Source:HGNC Symbol;Acc:HGNC:14246]	metalloprotease(PC00153)	NA	NA	ENSG00000008516
ENSG00000008517	ENSG00000008517	2007.02	3.28198	0.161117	20.3701	3.07758e-92	3.89006e-88	ENSG00000008517	9235	IL32	16	3065297	3082192	1	protein_coding	interleukin 32 [Source:HGNC Symbol;Acc:HGNC:16830]	NA	NA	NA	ENSG00000008517
ENSG00000008710	ENSG00000008710	1786.16	0.613865	0.258313	2.37644	0.0174807	0.0682531	ENSG00000008710	5310	PKD1	16	2088710	2135898	-1	protein_coding	polycystin 1, transient receptor potential channel interacting [Source:HGNC Symbol;Acc:HGNC:9008]	NA	NA	NA	ENSG00000008710
ENSG00000008735	ENSG00000008735	8.30011	1.11124	0.674172	1.6483	0.0992903	0.237515	ENSG00000008735	23542	MAPK8IP2	22	50600685	50613981	1	protein_coding	mitogen-activated protein kinase 8 interacting protein 2 [Source:HGNC Symbol;Acc:HGNC:6883]	signaling molecule(PC00207)	NA	NA	ENSG00000008735
ENSG00000008838	ENSG00000008838	1209.46	0.559898	0.232068	2.41265	0.0158372	0.0630395	ENSG00000008838	9862	MED24	17	40019097	40061215	-1	protein_coding	mediator complex subunit 24 [Source:HGNC Symbol;Acc:HGNC:22963]	NA	NA	NA	ENSG00000008838
ENSG00000008853	ENSG00000008853	595.806	-1.30219	0.237974	-5.47197	4.45071e-08	1.30678e-06	ENSG00000008853	23221	RHOBTB2	8	22987417	23020199	1	protein_coding	Rho related BTB domain containing 2 [Source:HGNC Symbol;Acc:HGNC:18756]	small GTPase(PC00208)	NA	NA	ENSG00000008853
ENSG00000008869	ENSG00000008869	888.691	0.726339	0.284438	2.5536	0.0106617	0.0465157	ENSG00000008869	54497	HEATR5B	2	36968383	37084342	-1	protein_coding	HEAT repeat containing 5B [Source:HGNC Symbol;Acc:HGNC:29273]	NA	NA	NA	ENSG00000008869
ENSG00000008952	ENSG00000008952	2219.4	-0.611234	0.171207	-3.57015	0.000356778	0.00313971	ENSG00000008952	7095	SEC62	3	169966635	169998373	1	protein_coding	SEC62 homolog, preprotein translocation factor [Source:HGNC Symbol;Acc:HGNC:11846]	NA	NA	NA	ENSG00000008952
ENSG00000008988	ENSG00000008988	20295	0.0190182	0.182412	0.10426	0.916963	0.957506	ENSG00000008988	6224	RPS20	8	56067295	56074581	-1	protein_coding	ribosomal protein S20 [Source:HGNC Symbol;Acc:HGNC:10405]	ribosomal protein(PC00202)	NA	NA	ENSG00000008988
ENSG00000009307	ENSG00000009307	23525.4	-0.151989	0.256072	-0.593541	0.552819	0.724645	ENSG00000009307	7812	CSDE1	1	114716913	114758676	-1	protein_coding	cold shock domain containing E1 [Source:HGNC Symbol;Acc:HGNC:29905]	NA	NA	NA	ENSG00000009307
ENSG00000009335	ENSG00000009335	1073.24	-0.0665022	0.205759	-0.323205	0.74654	0.85917	ENSG00000009335	9690	UBE3C	7	157138913	157269372	1	protein_coding	ubiquitin protein ligase E3C [Source:HGNC Symbol;Acc:HGNC:16803]	NA	NA	NA	ENSG00000009335
ENSG00000009413	ENSG00000009413	427.17	0.645215	0.277395	2.32598	0.0200195	0.0754687	ENSG00000009413	5980	REV3L	6	111299028	111483715	-1	protein_coding	REV3 like, DNA directed polymerase zeta catalytic subunit [Source:HGNC Symbol;Acc:HGNC:9968]	NA	NA	NA	ENSG00000009413
ENSG00000009694	ENSG00000009694	19.767	1.13007	0.395676	2.85606	0.00428933	0.0230466	ENSG00000009694	10178	TENM1	X	124375903	124963817	-1	protein_coding	teneurin transmembrane protein 1 [Source:HGNC Symbol;Acc:HGNC:8117]	NA	NA	NA	ENSG00000009694
ENSG00000009709	ENSG00000009709	229.398	-0.124553	0.28002	-0.444801	0.656464	0.800164	ENSG00000009709	5081	PAX7	1	18631006	18748866	1	protein_coding	paired box 7 [Source:HGNC Symbol;Acc:HGNC:8621]	NA	NA	NA	ENSG00000009709
ENSG00000009724	ENSG00000009724	1.5624	1.15598	1.4452	0.799877	0.423782	NA	ENSG00000009724	10747	MASP2	1	11026523	11047233	-1	protein_coding	mannan binding lectin serine peptidase 2 [Source:HGNC Symbol;Acc:HGNC:6902]	serine protease(PC00203)	NA	NA	ENSG00000009724
ENSG00000009765	ENSG00000009765	13.8291	0.88881	0.64892	1.36968	0.170788	0.343916	ENSG00000009765	389434	IYD	6	150368892	150405969	1	protein_coding	iodotyrosine deiodinase [Source:HGNC Symbol;Acc:HGNC:21071]	peroxidase(PC00180)	NA	NA	ENSG00000009765
ENSG00000009780	ENSG00000009780	185.094	0.080309	0.164739	0.487492	0.62591	0.778653	ENSG00000009780	199870	FAM76A	1	27725979	27763122	1	protein_coding	family with sequence similarity 76 member A [Source:HGNC Symbol;Acc:HGNC:28530]	NA	NA	NA	ENSG00000009780
ENSG00000009790	ENSG00000009790	1.36249	-1.82027	1.36213	-1.33634	0.181438	NA	ENSG00000009790	80342	TRAF3IP3	1	209756032	209782320	1	protein_coding	TRAF3 interacting protein 3 [Source:HGNC Symbol;Acc:HGNC:30766]	chaperone(PC00072)	NA	NA	ENSG00000009790
ENSG00000009830	ENSG00000009830	1538.01	-0.216379	0.242302	-0.893013	0.37185	0.570307	ENSG00000009830	29954	POMT2	14	77274956	77320884	-1	protein_coding	protein O-mannosyltransferase 2 [Source:HGNC Symbol;Acc:HGNC:19743]	NA	NA	NA	ENSG00000009830
ENSG00000009844	ENSG00000009844	1771.49	-0.260738	0.176325	-1.47874	0.139211	0.299789	ENSG00000009844	51534	VTA1	6	142147162	142224689	1	protein_coding	vesicle trafficking 1 [Source:HGNC Symbol;Acc:HGNC:20954]	NA	NA	NA	ENSG00000009844
ENSG00000009950	ENSG00000009950	18.4547	0.31751	0.435288	0.729425	0.465742	0.65273	ENSG00000009950	51085	MLXIPL	7	73593194	73624543	-1	protein_coding	MLX interacting protein like [Source:HGNC Symbol;Acc:HGNC:12744]	NA	NA	NA	ENSG00000009950
ENSG00000009954	ENSG00000009954	4402.93	-0.476689	0.196537	-2.42544	0.0152899	0.0613343	ENSG00000009954	9031	BAZ1B	7	73440398	73522278	-1	protein_coding	bromodomain adjacent to zinc finger domain 1B [Source:HGNC Symbol;Acc:HGNC:961]	NA	NA	NA	ENSG00000009954
ENSG00000010017	ENSG00000010017	1041.49	0.336368	0.106642	3.15417	0.00160954	0.0105412	ENSG00000010017	10048	RANBP9	6	13621498	13711564	-1	protein_coding	RAN binding protein 9 [Source:HGNC Symbol;Acc:HGNC:13727]	transfer/carrier protein(PC00219)	transporter(PC00227)	NA	ENSG00000010017
ENSG00000010030	ENSG00000010030	20.0424	0.62712	0.3934	1.5941	0.110913	0.256436	ENSG00000010030	51513	ETV7	6	36354091	36387800	-1	protein_coding	ETS variant 7 [Source:HGNC Symbol;Acc:HGNC:18160]	nucleic acid binding(PC00171)	signaling molecule(PC00207)	winged helix/forkhead transcription factor(PC00246)	ENSG00000010030
ENSG00000010072	ENSG00000010072	603.946	0.170759	0.160649	1.06293	0.287812	0.485967	ENSG00000010072	83932	SPRTN	1	231337104	231355023	1	protein_coding	SprT-like N-terminal domain [Source:HGNC Symbol;Acc:HGNC:25356]	NA	NA	NA	ENSG00000010072
ENSG00000010165	ENSG00000010165	1128.89	0.44714	0.12347	3.62146	0.000292946	0.0026803	ENSG00000010165	51603	METTL13	1	171781664	171814023	1	protein_coding	methyltransferase like 13 [Source:HGNC Symbol;Acc:HGNC:24248]	NA	NA	NA	ENSG00000010165
ENSG00000010219	ENSG00000010219	530.589	0.651079	0.148595	4.38157	1.17826e-05	0.000177195	ENSG00000010219	8798	DYRK4	12	4562204	4615302	1	protein_coding	dual specificity tyrosine phosphorylation regulated kinase 4 [Source:HGNC Symbol;Acc:HGNC:3095]	non-receptor serine/threonine protein kinase(PC00167)	non-receptor tyrosine protein kinase(PC00168)	NA	ENSG00000010219
ENSG00000010244	ENSG00000010244	5409.51	-0.113234	0.145993	-0.775608	0.43798	0.629578	ENSG00000010244	7756	ZNF207	17	32350117	32381886	1	protein_coding	zinc finger protein 207 [Source:HGNC Symbol;Acc:HGNC:12998]	DNA binding protein(PC00009)	NA	NA	ENSG00000010244
ENSG00000010256	ENSG00000010256	3559.57	0.0196018	0.119897	0.163489	0.870133	0.93236	ENSG00000010256	7384	UQCRC1	3	48599002	48610976	-1	protein_coding	ubiquinol-cytochrome c reductase core protein I [Source:HGNC Symbol;Acc:HGNC:12585]	metalloprotease(PC00153)	NA	NA	ENSG00000010256
ENSG00000010270	ENSG00000010270	1492.55	-0.163225	0.127032	-1.28491	0.198823	0.381326	ENSG00000010270	83930	STARD3NL	7	38178222	38230671	1	protein_coding	STARD3 N-terminal like [Source:HGNC Symbol;Acc:HGNC:19169]	NA	NA	NA	ENSG00000010270
ENSG00000010278	ENSG00000010278	4047.4	0.0408513	0.22291	0.183263	0.854591	0.923298	ENSG00000010278	928	CD9	12	6199715	6238271	1	protein_coding	CD9 molecule [Source:HGNC Symbol;Acc:HGNC:1709]	NA	NA	NA	ENSG00000010278
ENSG00000010282	ENSG00000010282	1.41607	-1.33527	1.54616	-0.863609	0.387802	NA	ENSG00000010282	57467	HHATL	3	42692663	42702827	-1	protein_coding	hedgehog acyltransferase like [Source:HGNC Symbol;Acc:HGNC:13242]	acyltransferase(PC00042)	NA	NA	ENSG00000010282
ENSG00000010292	ENSG00000010292	10139.9	-0.997702	0.112249	-8.88827	6.2066e-19	1.00579e-16	ENSG00000010292	9918	NCAPD2	12	6493356	6531955	1	protein_coding	non-SMC condensin I complex subunit D2 [Source:HGNC Symbol;Acc:HGNC:24305]	nucleic acid binding(PC00171)	NA	NA	ENSG00000010292
ENSG00000010295	ENSG00000010295	82.3838	0.0735912	0.228669	0.321824	0.747586	0.859683	ENSG00000010295	25900	IFFO1	12	6538375	6556083	-1	protein_coding	intermediate filament family orphan 1 [Source:HGNC Symbol;Acc:HGNC:24970]	NA	NA	NA	ENSG00000010295
ENSG00000010310	ENSG00000010310	65.4313	1.16896	0.538417	2.1711	0.0299238	0.101377	ENSG00000010310	2696	GIPR	19	45668244	45683724	1	protein_coding	gastric inhibitory polypeptide receptor [Source:HGNC Symbol;Acc:HGNC:4271]	NA	NA	NA	ENSG00000010310
ENSG00000010318	ENSG00000010318	195.915	-0.395881	0.274192	-1.44381	0.148792	0.313665	ENSG00000010318	51533	PHF7	3	52410657	52423641	1	protein_coding	PHD finger protein 7 [Source:HGNC Symbol;Acc:HGNC:18458]	DNA binding protein(PC00009)	NA	NA	ENSG00000010318
ENSG00000010319	ENSG00000010319	170.038	-1.39464	0.218223	-6.39087	1.64946e-10	8.09679e-09	ENSG00000010319	56920	SEMA3G	3	52433053	52445085	-1	protein_coding	semaphorin 3G [Source:HGNC Symbol;Acc:HGNC:30400]	membrane-bound signaling molecule(PC00152)	NA	NA	ENSG00000010319
ENSG00000010322	ENSG00000010322	1973.18	0.832829	0.211727	3.93351	8.37151e-05	0.000949022	ENSG00000010322	11188	NISCH	3	52455118	52493071	1	protein_coding	nischarin [Source:HGNC Symbol;Acc:HGNC:18006]	enzyme modulator(PC00095)	NA	NA	ENSG00000010322
ENSG00000010327	ENSG00000010327	2.37221	-0.425047	1.28014	-0.332031	0.739866	0.854664	ENSG00000010327	23166	STAB1	3	52495338	52524495	1	protein_coding	stabilin 1 [Source:HGNC Symbol;Acc:HGNC:18628]	NA	NA	NA	ENSG00000010327
ENSG00000010361	ENSG00000010361	161.866	-1.02067	0.258499	-3.94845	7.86582e-05	0.000901805	ENSG00000010361	80199	FUZ	19	49806869	49817376	-1	protein_coding	fuzzy planar cell polarity protein [Source:HGNC Symbol;Acc:HGNC:26219]	NA	NA	NA	ENSG00000010361
ENSG00000010379	ENSG00000010379	11.9931	0.356519	0.815063	0.437412	0.661812	0.804202	ENSG00000010379	6540	SLC6A13	12	220621	262873	-1	protein_coding	solute carrier family 6 member 13 [Source:HGNC Symbol;Acc:HGNC:11046]	cation transporter(PC00068)	NA	NA	ENSG00000010379
ENSG00000010404	ENSG00000010404	4272.4	-0.244948	0.351743	-0.696384	0.486188	0.669601	ENSG00000010404	3423	IDS	X	149476990	149521096	-1	protein_coding	iduronate 2-sulfatase [Source:HGNC Symbol;Acc:HGNC:5389]	NA	NA	NA	ENSG00000010404
ENSG00000010438	ENSG00000010438	0.11785	0	4.32804	0	1	NA	ENSG00000010438	5646	PRSS3	9	33750466	33799231	1	protein_coding	protease, serine 3 [Source:HGNC Symbol;Acc:HGNC:9486]	serine protease(PC00203)	NA	NA	ENSG00000010438
ENSG00000010539	ENSG00000010539	574.877	0.247878	0.197297	1.25637	0.208981	0.394434	ENSG00000010539	7752	ZNF200	16	3222325	3236221	-1	protein_coding	zinc finger protein 200 [Source:HGNC Symbol;Acc:HGNC:12993]	NA	NA	NA	ENSG00000010539
ENSG00000010610	ENSG00000010610	2.37645	-1.89251	1.16937	-1.6184	0.105577	0.24782	ENSG00000010610	920	CD4	12	6786858	6820808	1	protein_coding	CD4 molecule [Source:HGNC Symbol;Acc:HGNC:1678]	NA	NA	NA	ENSG00000010610
ENSG00000010626	ENSG00000010626	464.497	-1.21344	0.280941	-4.31919	1.56606e-05	0.00022597	ENSG00000010626	10233	LRRC23	12	6873569	6914243	1	protein_coding	leucine rich repeat containing 23 [Source:HGNC Symbol;Acc:HGNC:19138]	NA	NA	NA	ENSG00000010626
ENSG00000010671	ENSG00000010671	2.89646	-0.131211	0.982883	-0.133496	0.893801	0.944217	ENSG00000010671	695	BTK	X	101349447	101390796	-1	protein_coding	Bruton tyrosine kinase [Source:HGNC Symbol;Acc:HGNC:1133]	NA	NA	NA	ENSG00000010671
ENSG00000010704	ENSG00000010704	9.37757	1.14982	0.474837	2.42151	0.0154563	0.0618792	ENSG00000010704	3077	HFE	6	26087281	26098343	1	protein_coding	hemochromatosis [Source:HGNC Symbol;Acc:HGNC:4886]	NA	NA	NA	ENSG00000010704
ENSG00000010803	ENSG00000010803	918.338	-0.361502	0.111692	-3.23661	0.00120959	0.00839146	ENSG00000010803	22955	SCMH1	1	41027200	41242154	-1	protein_coding	sex comb on midleg homolog 1 (Drosophila) [Source:HGNC Symbol;Acc:HGNC:19003]	chromatin/chromatin-binding protein(PC00077)	transcription factor(PC00218)	NA	ENSG00000010803
ENSG00000010810	ENSG00000010810	590.099	0.489111	0.313119	1.56206	0.118274	0.268157	ENSG00000010810	2534	FYN	6	111660332	111873452	-1	protein_coding	FYN proto-oncogene, Src family tyrosine kinase [Source:HGNC Symbol;Acc:HGNC:4037]	NA	NA	NA	ENSG00000010810
ENSG00000010818	ENSG00000010818	1139.91	0.162092	0.347444	0.466527	0.640838	0.789138	ENSG00000010818	3097	HIVEP2	6	142751467	142956698	-1	protein_coding	human immunodeficiency virus type I enhancer binding protein 2 [Source:HGNC Symbol;Acc:HGNC:4921]	NA	NA	NA	ENSG00000010818
ENSG00000010932	ENSG00000010932	0.0589248	0	4.32804	0	1	NA	ENSG00000010932	2326	FMO1	1	171248471	171285978	1	protein_coding	flavin containing monooxygenase 1 [Source:HGNC Symbol;Acc:HGNC:3769]	oxygenase(PC00177)	NA	NA	ENSG00000010932
ENSG00000011007	ENSG00000011007	1939.52	0.210874	0.210927	0.999749	0.317432	0.516023	ENSG00000011007	6924	ELOA	1	23743155	23762059	1	protein_coding	elongin A [Source:HGNC Symbol;Acc:HGNC:11620]	NA	NA	NA	ENSG00000011007
ENSG00000011009	ENSG00000011009	1336.09	0.400011	0.149855	2.66932	0.00760045	0.0358188	ENSG00000011009	11313	LYPLA2	1	23790970	23795539	1	protein_coding	lysophospholipase II [Source:HGNC Symbol;Acc:HGNC:6738]	NA	NA	NA	ENSG00000011009
ENSG00000011021	ENSG00000011021	1030.16	0.382392	0.366976	1.04201	0.297408	0.496072	ENSG00000011021	1185	CLCN6	1	11806096	11843144	1	protein_coding	chloride voltage-gated channel 6 [Source:HGNC Symbol;Acc:HGNC:2024]	NA	NA	NA	ENSG00000011021
ENSG00000011028	ENSG00000011028	10333.1	-0.54169	0.167426	-3.2354	0.00121472	0.00842014	ENSG00000011028	9902	MRC2	17	62627401	62693597	1	protein_coding	mannose receptor C type 2 [Source:HGNC Symbol;Acc:HGNC:16875]	NA	NA	NA	ENSG00000011028
ENSG00000011052	ENSG00000011052	931.399	-0.147292	0.541019	-0.27225	0.78543	0.884125	ENSG00000011052	654364	NME1-NME2	17	51153590	51171744	1	protein_coding	NME1-NME2 readthrough [Source:HGNC Symbol;Acc:HGNC:33531]	NA	NA	NA	ENSG00000011052
ENSG00000011083	ENSG00000011083	0.117133	0	4.32804	0	1	NA	ENSG00000011083	6534	SLC6A7	5	150189957	150222788	1	protein_coding	solute carrier family 6 member 7 [Source:HGNC Symbol;Acc:HGNC:11054]	cation transporter(PC00068)	NA	NA	ENSG00000011083
ENSG00000011105	ENSG00000011105	1340.88	-0.476974	0.276662	-1.72403	0.084702	0.212301	ENSG00000011105	10867	TSPAN9	12	3077355	3286564	1	protein_coding	tetraspanin 9 [Source:HGNC Symbol;Acc:HGNC:21640]	NA	NA	NA	ENSG00000011105
ENSG00000011114	ENSG00000011114	861.445	-0.544979	0.288116	-1.89153	0.0585542	0.165059	ENSG00000011114	55727	BTBD7	14	93237550	93333092	-1	protein_coding	BTB domain containing 7 [Source:HGNC Symbol;Acc:HGNC:18269]	NA	NA	NA	ENSG00000011114
ENSG00000011132	ENSG00000011132	230.053	0.646801	0.133643	4.83976	1.29994e-06	2.59136e-05	ENSG00000011132	9546	APBA3	19	3750819	3761699	-1	protein_coding	amyloid beta precursor protein binding family A member 3 [Source:HGNC Symbol;Acc:HGNC:580]	membrane trafficking regulatory protein(PC00151)	NA	NA	ENSG00000011132
ENSG00000011143	ENSG00000011143	469.264	-0.356759	0.184902	-1.92945	0.053675	0.154933	ENSG00000011143	54903	MKS1	17	58205437	58219605	-1	protein_coding	Meckel syndrome, type 1 [Source:HGNC Symbol;Acc:HGNC:7121]	extracellular matrix protein(PC00102)	NA	NA	ENSG00000011143
ENSG00000011198	ENSG00000011198	544.939	-0.152791	0.217485	-0.702536	0.482345	0.666722	ENSG00000011198	51099	ABHD5	3	43690113	43734371	1	protein_coding	abhydrolase domain containing 5 [Source:HGNC Symbol;Acc:HGNC:21396]	NA	NA	NA	ENSG00000011198
ENSG00000011201	ENSG00000011201	1306.28	0.958493	0.366541	2.61497	0.00892353	0.0404958	ENSG00000011201	3730	ANOS1	X	8528874	8732186	-1	protein_coding	anosmin 1 [Source:HGNC Symbol;Acc:HGNC:6211]	NA	NA	NA	ENSG00000011201
ENSG00000011243	ENSG00000011243	1014.85	0.774673	0.229606	3.37393	0.000741045	0.0056717	ENSG00000011243	26993	AKAP8L	19	15380048	15419141	-1	protein_coding	A-kinase anchoring protein 8 like [Source:HGNC Symbol;Acc:HGNC:29857]	NA	NA	NA	ENSG00000011243
ENSG00000011258	ENSG00000011258	556.013	-0.474472	0.204102	-2.32468	0.0200888	0.0756173	ENSG00000011258	54799	MBTD1	17	51177425	51260163	-1	protein_coding	mbt domain containing 1 [Source:HGNC Symbol;Acc:HGNC:19866]	chromatin/chromatin-binding protein(PC00077)	transcription factor(PC00218)	NA	ENSG00000011258
ENSG00000011260	ENSG00000011260	1490.13	0.0337607	0.104151	0.324151	0.745824	0.858659	ENSG00000011260	51096	UTP18	17	51260528	51297936	1	protein_coding	UTP18, small subunit processome component [Source:HGNC Symbol;Acc:HGNC:24274]	NA	NA	NA	ENSG00000011260
ENSG00000011275	ENSG00000011275	3727.61	-0.773318	0.21824	-3.54343	0.000394953	0.00340881	ENSG00000011275	54476	RNF216	7	5620047	5781739	-1	protein_coding	ring finger protein 216 [Source:HGNC Symbol;Acc:HGNC:21698]	NA	NA	NA	ENSG00000011275
ENSG00000011295	ENSG00000011295	410.954	0.522575	0.198119	2.63769	0.00834738	0.0383829	ENSG00000011295	54902	TTC19	17	15999380	16045015	1	protein_coding	tetratricopeptide repeat domain 19 [Source:HGNC Symbol;Acc:HGNC:26006]	NA	NA	NA	ENSG00000011295
ENSG00000011304	ENSG00000011304	6633.12	-0.168592	0.203754	-0.82743	0.407993	0.603634	ENSG00000011304	5725	PTBP1	19	797075	812327	1	protein_coding	polypyrimidine tract binding protein 1 [Source:HGNC Symbol;Acc:HGNC:9583]	NA	NA	NA	ENSG00000011304
ENSG00000011332	ENSG00000011332	85.4547	0.362685	0.328882	1.10278	0.270123	0.466349	ENSG00000011332	8193	DPF1	19	38211006	38229714	-1	protein_coding	double PHD fingers 1 [Source:HGNC Symbol;Acc:HGNC:20225]	acetyltransferase(PC00038)	chromatin/chromatin-binding protein(PC00077)	zinc finger transcription factor(PC00244)	ENSG00000011332
ENSG00000011347	ENSG00000011347	168.843	1.02279	0.470607	2.17335	0.0297541	0.100964	ENSG00000011347	9066	SYT7	11	61515313	61581148	-1	protein_coding	synaptotagmin 7 [Source:HGNC Symbol;Acc:HGNC:11514]	membrane trafficking regulatory protein(PC00151)	NA	NA	ENSG00000011347
ENSG00000011376	ENSG00000011376	832.79	0.156301	0.134082	1.16571	0.243731	0.435917	ENSG00000011376	23395	LARS2	3	45388506	45549421	1	protein_coding	leucyl-tRNA synthetase 2, mitochondrial [Source:HGNC Symbol;Acc:HGNC:17095]	aminoacyl-tRNA synthetase(PC00047)	NA	NA	ENSG00000011376
ENSG00000011405	ENSG00000011405	3098.25	-0.404758	0.237235	-1.70615	0.0879806	0.217953	ENSG00000011405	5286	PIK3C2A	11	17077730	17207983	-1	protein_coding	phosphatidylinositol-4-phosphate 3-kinase catalytic subunit type 2 alpha [Source:HGNC Symbol;Acc:HGNC:8971]	kinase(PC00137)	NA	NA	ENSG00000011405
ENSG00000011422	ENSG00000011422	1773.33	0.318744	0.179343	1.77729	0.0755202	0.196556	ENSG00000011422	5329	PLAUR	19	43646095	43670547	-1	protein_coding	plasminogen activator, urokinase receptor [Source:HGNC Symbol;Acc:HGNC:9053]	NA	NA	NA	ENSG00000011422
ENSG00000011426	ENSG00000011426	11676.6	-0.522756	0.158342	-3.30143	0.000961928	0.00700592	ENSG00000011426	54443	ANLN	7	36389806	36453791	1	protein_coding	anillin actin binding protein [Source:HGNC Symbol;Acc:HGNC:14082]	NA	NA	NA	ENSG00000011426
ENSG00000011451	ENSG00000011451	386.987	-0.0902662	0.223349	-0.404149	0.686103	0.820235	ENSG00000011451	58525	WIZ	19	15419980	15449951	-1	protein_coding	widely interspaced zinc finger motifs [Source:HGNC Symbol;Acc:HGNC:30917]	KRAB box transcription factor(PC00029)	NA	NA	ENSG00000011451
ENSG00000011454	ENSG00000011454	1156.35	-0.0262849	0.164439	-0.159845	0.873003	0.933678	ENSG00000011454	2844	RABGAP1	9	122940833	123104866	1	protein_coding	RAB GTPase activating protein 1 [Source:HGNC Symbol;Acc:HGNC:17155]	G-protein modulator(PC00022)	cysteine protease(PC00081)	NA	ENSG00000011454
ENSG00000011465	ENSG00000011465	3.82091	-1.48015	0.912952	-1.62128	0.104958	0.246938	ENSG00000011465	1634	DCN	12	91140484	91183123	-1	protein_coding	decorin [Source:HGNC Symbol;Acc:HGNC:2705]	NA	NA	NA	ENSG00000011465
ENSG00000011478	ENSG00000011478	489.891	0.185801	0.154524	1.20241	0.229206	0.418502	ENSG00000011478	54814	QPCTL	19	45692483	45703989	1	protein_coding	glutaminyl-peptide cyclotransferase like [Source:HGNC Symbol;Acc:HGNC:25952]	metalloprotease(PC00153)	transferase(PC00220)	NA	ENSG00000011478
ENSG00000011485	ENSG00000011485	1932.39	-0.196015	0.115934	-1.69075	0.0908847	0.22287	ENSG00000011485	5536	PPP5C	19	46346994	46392981	1	protein_coding	protein phosphatase 5 catalytic subunit [Source:HGNC Symbol;Acc:HGNC:9322]	NA	NA	NA	ENSG00000011485
ENSG00000011523	ENSG00000011523	685.155	-0.352069	0.281822	-1.24926	0.21157	0.397446	ENSG00000011523	23177	CEP68	2	65056366	65087004	1	protein_coding	centrosomal protein 68 [Source:HGNC Symbol;Acc:HGNC:29076]	NA	NA	NA	ENSG00000011523
ENSG00000011566	ENSG00000011566	1191.85	-0.00615451	0.126709	-0.048572	0.96126	0.980973	ENSG00000011566	8491	MAP4K3	2	39249266	39437312	-1	protein_coding	mitogen-activated protein kinase kinase kinase kinase 3 [Source:HGNC Symbol;Acc:HGNC:6865]	NA	NA	NA	ENSG00000011566
ENSG00000011590	ENSG00000011590	0.224554	0	4.32804	0	1	NA	ENSG00000011590	27033	ZBTB32	19	35704527	35717038	1	protein_coding	zinc finger and BTB domain containing 32 [Source:HGNC Symbol;Acc:HGNC:16763]	NA	NA	NA	ENSG00000011590
ENSG00000011600	ENSG00000011600	0.119751	0.917077	4.32804	0.211892	0.832191	NA	ENSG00000011600	7305	TYROBP	19	35904401	35908295	-1	protein_coding	TYRO protein tyrosine kinase binding protein [Source:HGNC Symbol;Acc:HGNC:12449]	NA	NA	NA	ENSG00000011600
ENSG00000011638	ENSG00000011638	398.745	-0.284124	0.279005	-1.01835	0.308512	0.507	ENSG00000011638	57146	TMEM159	16	21158377	21180616	1	protein_coding	transmembrane protein 159 [Source:HGNC Symbol;Acc:HGNC:30136]	NA	NA	NA	ENSG00000011638
ENSG00000011677	ENSG00000011677	442.595	-0.363699	0.301398	-1.2067	0.227546	0.416446	ENSG00000011677	2556	GABRA3	X	152166234	152451358	-1	protein_coding	gamma-aminobutyric acid type A receptor alpha3 subunit [Source:HGNC Symbol;Acc:HGNC:4077]	GABA receptor(PC00023)	acetylcholine receptor(PC00037)	NA	ENSG00000011677
ENSG00000012048	ENSG00000012048	1448.93	-1.17634	0.295897	-3.97549	7.02351e-05	0.000818601	ENSG00000012048	672	BRCA1	17	43044295	43170245	-1	protein_coding	BRCA1, DNA repair associated [Source:HGNC Symbol;Acc:HGNC:1100]	ubiquitin-protein ligase(PC00234)	NA	NA	ENSG00000012048
ENSG00000012061	ENSG00000012061	2001.51	-0.216693	0.162668	-1.33212	0.182822	0.359799	ENSG00000012061	2067	ERCC1	19	45407333	45478828	-1	protein_coding	ERCC excision repair 1, endonuclease non-catalytic subunit [Source:HGNC Symbol;Acc:HGNC:3433]	endodeoxyribonuclease(PC00093)	NA	NA	ENSG00000012061
ENSG00000012124	ENSG00000012124	84.7705	-0.329146	0.460988	-0.714002	0.475226	0.660675	ENSG00000012124	933	CD22	19	35319261	35347355	1	protein_coding	CD22 molecule [Source:HGNC Symbol;Acc:HGNC:1643]	NA	NA	NA	ENSG00000012124
ENSG00000012171	ENSG00000012171	640.65	-0.134657	0.25569	-0.526642	0.598442	0.758279	ENSG00000012171	7869	SEMA3B	3	50267558	50277546	1	protein_coding	semaphorin 3B [Source:HGNC Symbol;Acc:HGNC:10724]	membrane-bound signaling molecule(PC00152)	NA	NA	ENSG00000012171
ENSG00000012174	ENSG00000012174	375.083	-0.546309	0.259267	-2.10713	0.035106	0.113896	ENSG00000012174	51360	MBTPS2	X	21839636	21885424	1	protein_coding	membrane bound transcription factor peptidase, site 2 [Source:HGNC Symbol;Acc:HGNC:15455]	metalloprotease(PC00153)	NA	NA	ENSG00000012174
ENSG00000012211	ENSG00000012211	436.701	0.652142	0.143556	4.54278	5.55172e-06	9.26998e-05	ENSG00000012211	4007	PRICKLE3	X	49175264	49186528	-1	protein_coding	prickle planar cell polarity protein 3 [Source:HGNC Symbol;Acc:HGNC:6645]	actin family cytoskeletal protein(PC00041)	structural protein(PC00211)	NA	ENSG00000012211
ENSG00000012223	ENSG00000012223	18.9731	1.34742	0.755895	1.78254	0.0746608	0.195022	ENSG00000012223	4057	LTF	3	46435645	46485234	-1	protein_coding	lactotransferrin [Source:HGNC Symbol;Acc:HGNC:6720]	receptor(PC00197)	serine protease(PC00203)	transfer/carrier protein(PC00219)	ENSG00000012223
ENSG00000012232	ENSG00000012232	2839.25	0.143423	0.246215	0.58251	0.560223	0.73055	ENSG00000012232	2137	EXTL3	8	28600469	28755599	1	protein_coding	exostosin like glycosyltransferase 3 [Source:HGNC Symbol;Acc:HGNC:3518]	NA	NA	NA	ENSG00000012232
ENSG00000012504	ENSG00000012504	0.23886	2.0861	4.29633	0.485554	0.627283	NA	ENSG00000012504	9971	NR1H4	12	100473708	100564413	1	protein_coding	nuclear receptor subfamily 1 group H member 4 [Source:HGNC Symbol;Acc:HGNC:7967]	C4 zinc finger nuclear receptor(PC00169)	nucleic acid binding(PC00171)	receptor(PC00197)	ENSG00000012504
ENSG00000012660	ENSG00000012660	5071.98	-0.100725	0.136377	-0.738574	0.460166	0.648332	ENSG00000012660	60481	ELOVL5	6	53267398	53349179	-1	protein_coding	ELOVL fatty acid elongase 5 [Source:HGNC Symbol;Acc:HGNC:21308]	acyltransferase(PC00042)	NA	NA	ENSG00000012660
ENSG00000012779	ENSG00000012779	829.297	-0.0730214	0.256431	-0.284761	0.775827	0.8784	ENSG00000012779	240	ALOX5	10	45374176	45446119	1	protein_coding	arachidonate 5-lipoxygenase [Source:HGNC Symbol;Acc:HGNC:435]	oxygenase(PC00177)	NA	NA	ENSG00000012779
ENSG00000012817	ENSG00000012817	0.307723	1.75554	4.31728	0.406632	0.684279	NA	ENSG00000012817	8284	KDM5D	Y	19703865	19744939	-1	protein_coding	lysine demethylase 5D [Source:HGNC Symbol;Acc:HGNC:11115]	zinc finger transcription factor(PC00244)	NA	NA	ENSG00000012817
ENSG00000012822	ENSG00000012822	1460.4	0.616394	0.332487	1.85389	0.0637546	0.174977	ENSG00000012822	57658	CALCOCO1	12	53708517	53727745	-1	protein_coding	calcium binding and coiled-coil domain 1 [Source:HGNC Symbol;Acc:HGNC:29306]	NA	NA	NA	ENSG00000012822
ENSG00000012963	ENSG00000012963	886.355	-1.00692	0.248982	-4.04414	5.25166e-05	0.000641363	ENSG00000012963	55148	UBR7	14	93207056	93229215	1	protein_coding	ubiquitin protein ligase E3 component n-recognin 7 (putative) [Source:HGNC Symbol;Acc:HGNC:20344]	NA	NA	NA	ENSG00000012963
ENSG00000012983	ENSG00000012983	2322.33	-0.0249229	0.113234	-0.2201	0.825793	0.907655	ENSG00000012983	11183	MAP4K5	14	50418501	50561126	-1	protein_coding	mitogen-activated protein kinase kinase kinase kinase 5 [Source:HGNC Symbol;Acc:HGNC:6867]	NA	NA	NA	ENSG00000012983
ENSG00000013016	ENSG00000013016	658.835	0.237903	0.425035	0.559726	0.575666	0.741471	ENSG00000013016	30845	EHD3	2	31234337	31269447	1	protein_coding	EH domain containing 3 [Source:HGNC Symbol;Acc:HGNC:3244]	G-protein modulator(PC00022)	calcium-binding protein(PC00060)	membrane traffic protein(PC00150)	ENSG00000013016
ENSG00000013275	ENSG00000013275	2439.91	-0.109009	0.123172	-0.885009	0.376152	0.574257	ENSG00000013275	5704	PSMC4	19	39971005	39981441	1	protein_coding	proteasome 26S subunit, ATPase 4 [Source:HGNC Symbol;Acc:HGNC:9551]	hydrolase(PC00121)	NA	NA	ENSG00000013275
ENSG00000013288	ENSG00000013288	949.383	-0.223982	0.0770992	-2.90512	0.00367112	0.0203778	ENSG00000013288	23324	MAN2B2	4	6575175	6623362	1	protein_coding	mannosidase alpha class 2B member 2 [Source:HGNC Symbol;Acc:HGNC:29623]	NA	NA	NA	ENSG00000013288
ENSG00000013293	ENSG00000013293	18.9993	1.55254	0.736669	2.10751	0.0350735	0.113805	ENSG00000013293	57709	SLC7A14	3	170459584	170586074	-1	protein_coding	solute carrier family 7 member 14 [Source:HGNC Symbol;Acc:HGNC:29326]	amino acid transporter(PC00046)	NA	NA	ENSG00000013293
ENSG00000013297	ENSG00000013297	9.23768	1.00437	0.752054	1.3355	0.181713	0.358267	ENSG00000013297	5010	CLDN11	3	170418865	170860380	1	protein_coding	claudin 11 [Source:HGNC Symbol;Acc:HGNC:8514]	tight junction(PC00214)	NA	NA	ENSG00000013297
ENSG00000013306	ENSG00000013306	4753.31	0.229582	0.113702	2.01916	0.0434708	0.133124	ENSG00000013306	51629	SLC25A39	17	44319625	44324870	-1	protein_coding	solute carrier family 25 member 39 [Source:HGNC Symbol;Acc:HGNC:24279]	NA	NA	NA	ENSG00000013306
ENSG00000013364	ENSG00000013364	3576.31	-0.185104	0.233671	-0.792156	0.428269	0.621437	ENSG00000013364	9961	MVP	16	29820394	29848039	1	protein_coding	major vault protein [Source:HGNC Symbol;Acc:HGNC:7531]	ribonucleoprotein(PC00201)	NA	NA	ENSG00000013364
ENSG00000013374	ENSG00000013374	508.193	0.0199015	0.340657	0.0584209	0.953413	0.97719	ENSG00000013374	51667	NUB1	7	151341699	151378449	1	protein_coding	negative regulator of ubiquitin like proteins 1 [Source:HGNC Symbol;Acc:HGNC:17623]	NA	NA	NA	ENSG00000013374
ENSG00000013375	ENSG00000013375	1001.39	0.516048	0.181039	2.85049	0.00436526	0.0233602	ENSG00000013375	5238	PGM3	6	83161150	83193936	-1	protein_coding	phosphoglucomutase 3 [Source:HGNC Symbol;Acc:HGNC:8907]	NA	NA	NA	ENSG00000013375
ENSG00000013392	ENSG00000013392	153.626	0.25703	0.203806	1.26115	0.207255	0.392229	ENSG00000013392	112611	RWDD2A	6	83193379	83198932	1	protein_coding	RWD domain containing 2A [Source:HGNC Symbol;Acc:HGNC:21385]	phosphatase(PC00181)	NA	NA	ENSG00000013392
ENSG00000013441	ENSG00000013441	1557.2	1.683	0.502414	3.34982	0.000808633	0.00608763	ENSG00000013441	1195	CLK1	2	200853009	200864744	-1	protein_coding	CDC like kinase 1 [Source:HGNC Symbol;Acc:HGNC:2068]	NA	NA	NA	ENSG00000013441
ENSG00000013503	ENSG00000013503	344.283	0.184005	0.25205	0.730033	0.46537	0.652499	ENSG00000013503	55703	POLR3B	12	106357658	106510198	1	protein_coding	RNA polymerase III subunit B [Source:HGNC Symbol;Acc:HGNC:30348]	DNA-directed RNA polymerase(PC00019)	nucleotidyltransferase(PC00174)	NA	ENSG00000013503
ENSG00000013523	ENSG00000013523	642.169	-0.0654482	0.198289	-0.330065	0.741351	0.855261	ENSG00000013523	23357	ANGEL1	14	76786178	76826246	-1	protein_coding	angel homolog 1 [Source:HGNC Symbol;Acc:HGNC:19961]	exoribonuclease(PC00099)	NA	NA	ENSG00000013523
ENSG00000013561	ENSG00000013561	638.103	-0.301815	0.254498	-1.18592	0.235653	0.426681	ENSG00000013561	9604	RNF14	5	141958328	141990291	1	protein_coding	ring finger protein 14 [Source:HGNC Symbol;Acc:HGNC:10058]	ubiquitin-protein ligase(PC00234)	NA	NA	ENSG00000013561
ENSG00000013563	ENSG00000013563	928.978	0.0538688	0.222141	0.242498	0.808394	0.897624	ENSG00000013563	1774	DNASE1L1	X	154401238	154412112	-1	protein_coding	deoxyribonuclease 1 like 1 [Source:HGNC Symbol;Acc:HGNC:2957]	NA	NA	NA	ENSG00000013563
ENSG00000013573	ENSG00000013573	2941.03	0.388789	0.309933	1.25443	0.209687	0.395146	ENSG00000013573	1663	DDX11	12	31073845	31104791	1	protein_coding	DEAD/H-box helicase 11 [Source:HGNC Symbol;Acc:HGNC:2736]	DNA helicase(PC00011)	NA	NA	ENSG00000013573
ENSG00000013583	ENSG00000013583	838.992	-0.204703	0.178348	-1.14777	0.251065	0.444058	ENSG00000013583	50865	HEBP1	12	12974864	13000273	-1	protein_coding	heme binding protein 1 [Source:HGNC Symbol;Acc:HGNC:17176]	NA	NA	NA	ENSG00000013583
ENSG00000013588	ENSG00000013588	3490.29	-0.313224	0.174859	-1.7913	0.0732454	0.192458	ENSG00000013588	9052	GPRC5A	12	12890782	12917937	1	protein_coding	G protein-coupled receptor class C group 5 member A [Source:HGNC Symbol;Acc:HGNC:9836]	G-protein coupled receptor(PC00021)	NA	NA	ENSG00000013588
ENSG00000013619	ENSG00000013619	326.52	0.421415	0.181392	2.32323	0.0201667	0.0758538	ENSG00000013619	10046	MAMLD1	X	150361422	150514178	1	protein_coding	mastermind like domain containing 1 [Source:HGNC Symbol;Acc:HGNC:2568]	NA	NA	NA	ENSG00000013619
ENSG00000013725	ENSG00000013725	1.29488	1.57593	1.47376	1.06932	0.284925	NA	ENSG00000013725	923	CD6	11	60971680	61020377	1	protein_coding	CD6 molecule [Source:HGNC Symbol;Acc:HGNC:1691]	oxidase(PC00175)	receptor(PC00197)	serine protease(PC00203)	ENSG00000013725
ENSG00000013810	ENSG00000013810	2959.85	-0.138368	0.238328	-0.580581	0.561523	0.731302	ENSG00000013810	10460	TACC3	4	1721490	1745176	1	protein_coding	transforming acidic coiled-coil containing protein 3 [Source:HGNC Symbol;Acc:HGNC:11524]	NA	NA	NA	ENSG00000013810
ENSG00000014123	ENSG00000014123	721.851	0.073458	0.136841	0.536815	0.591396	0.753173	ENSG00000014123	23376	UFL1	6	96521595	96555276	1	protein_coding	UFM1 specific ligase 1 [Source:HGNC Symbol;Acc:HGNC:23039]	NA	NA	NA	ENSG00000014123
ENSG00000014138	ENSG00000014138	673.83	-0.0931081	0.208525	-0.446508	0.655231	0.799167	ENSG00000014138	23649	POLA2	11	65261762	65305589	1	protein_coding	DNA polymerase alpha 2, accessory subunit [Source:HGNC Symbol;Acc:HGNC:30073]	DNA-directed DNA polymerase(PC00018)	NA	NA	ENSG00000014138
ENSG00000014164	ENSG00000014164	809.283	-0.219569	0.116571	-1.88356	0.0596239	0.167148	ENSG00000014164	23144	ZC3H3	8	143437655	143541453	-1	protein_coding	zinc finger CCCH-type containing 3 [Source:HGNC Symbol;Acc:HGNC:28972]	NA	NA	NA	ENSG00000014164
ENSG00000014216	ENSG00000014216	2329.19	0.173727	0.16098	1.07918	0.280506	0.47843	ENSG00000014216	823	CAPN1	11	65180566	65212006	1	protein_coding	calpain 1 [Source:HGNC Symbol;Acc:HGNC:1476]	annexin(PC00050)	calmodulin(PC00061)	cysteine protease(PC00081)	ENSG00000014216
ENSG00000014257	ENSG00000014257	1.44749	1.62658	1.90873	0.852176	0.394116	NA	ENSG00000014257	55	ACPP	3	132317367	132368298	1	protein_coding	acid phosphatase, prostate [Source:HGNC Symbol;Acc:HGNC:125]	phosphatase(PC00181)	NA	NA	ENSG00000014257
ENSG00000014641	ENSG00000014641	4692.12	0.413121	0.115801	3.56752	0.000360376	0.0031633	ENSG00000014641	4190	MDH1	2	63588609	63607197	1	protein_coding	malate dehydrogenase 1 [Source:HGNC Symbol;Acc:HGNC:6970]	dehydrogenase(PC00092)	NA	NA	ENSG00000014641
ENSG00000014824	ENSG00000014824	1724.93	-0.709745	0.221719	-3.2011	0.00136903	0.00922169	ENSG00000014824	10463	SLC30A9	4	41990472	42090457	1	protein_coding	solute carrier family 30 member 9 [Source:HGNC Symbol;Acc:HGNC:1329]	NA	NA	NA	ENSG00000014824
ENSG00000014914	ENSG00000014914	620.929	0.280418	0.169689	1.65254	0.0984242	0.236	ENSG00000014914	10903	MTMR11	1	149928651	149936869	-1	protein_coding	myotubularin related protein 11 [Source:HGNC Symbol;Acc:HGNC:24307]	phosphatase(PC00181)	NA	NA	ENSG00000014914
ENSG00000014919	ENSG00000014919	869.99	-0.583217	0.146395	-3.98385	6.7809e-05	0.000796566	ENSG00000014919	1355	COX15	10	99711844	99732100	-1	protein_coding	COX15, cytochrome c oxidase assembly homolog [Source:HGNC Symbol;Acc:HGNC:2263]	NA	NA	NA	ENSG00000014919
ENSG00000015133	ENSG00000015133	5.83589	1.71529	0.849426	2.01935	0.0434511	0.13308	ENSG00000015133	440193	CCDC88C	14	91271323	91417844	-1	protein_coding	coiled-coil domain containing 88C [Source:HGNC Symbol;Acc:HGNC:19967]	kinase modulator(PC00140)	membrane traffic protein(PC00150)	NA	ENSG00000015133
ENSG00000015153	ENSG00000015153	457.634	0.32795	0.126256	2.59749	0.00939065	0.0421066	ENSG00000015153	10138	YAF2	12	42157104	42238349	-1	protein_coding	YY1 associated factor 2 [Source:HGNC Symbol;Acc:HGNC:17363]	transcription cofactor(PC00217)	NA	NA	ENSG00000015153
ENSG00000015171	ENSG00000015171	674.563	-0.34565	0.232999	-1.48348	0.137946	0.297804	ENSG00000015171	10771	ZMYND11	10	134465	254637	1	protein_coding	zinc finger MYND-type containing 11 [Source:HGNC Symbol;Acc:HGNC:16966]	NA	NA	NA	ENSG00000015171
ENSG00000015285	ENSG00000015285	3.7387	0.925162	0.784577	1.17919	0.238324	0.429696	ENSG00000015285	7454	WAS	X	48676596	48691427	1	protein_coding	Wiskott-Aldrich syndrome [Source:HGNC Symbol;Acc:HGNC:12731]	actin family cytoskeletal protein(PC00041)	NA	NA	ENSG00000015285
ENSG00000015413	ENSG00000015413	0.950456	3.00636	1.94173	1.54829	0.121552	NA	ENSG00000015413	1800	DPEP1	16	89613308	89638456	1	protein_coding	dipeptidase 1 (renal) [Source:HGNC Symbol;Acc:HGNC:3002]	NA	NA	NA	ENSG00000015413
ENSG00000015475	ENSG00000015475	313.553	0.0232811	0.172088	0.135286	0.892386	0.94411	ENSG00000015475	637	BID	22	17734138	17774770	-1	protein_coding	BH3 interacting domain death agonist [Source:HGNC Symbol;Acc:HGNC:1050]	NA	NA	NA	ENSG00000015475
ENSG00000015479	ENSG00000015479	9579.87	-0.683183	0.163542	-4.17743	2.94826e-05	0.000385576	ENSG00000015479	9782	MATR3	5	139293648	139331677	1	protein_coding	matrin 3 [Source:HGNC Symbol;Acc:HGNC:6912]	NA	NA	NA	ENSG00000015479
ENSG00000015520	ENSG00000015520	4.06023	0.811742	0.824928	0.984015	0.325108	0.523776	ENSG00000015520	29881	NPC1L1	7	44512535	44541315	-1	protein_coding	NPC1 like intracellular cholesterol transporter 1 [Source:HGNC Symbol;Acc:HGNC:7898]	NA	NA	NA	ENSG00000015520
ENSG00000015532	ENSG00000015532	1095.01	-0.0529992	0.130615	-0.405766	0.684915	0.81947	ENSG00000015532	64132	XYLT2	17	50346092	50363138	1	protein_coding	xylosyltransferase 2 [Source:HGNC Symbol;Acc:HGNC:15517]	NA	NA	NA	ENSG00000015532
ENSG00000015568	ENSG00000015568	356.642	0.20353	0.513101	0.396666	0.691614	0.823561	ENSG00000015568	84220	RGPD5	2	109792758	109857695	1	protein_coding	RANBP2-like and GRIP domain containing 5 [Source:HGNC Symbol;Acc:HGNC:32418]	NA	NA	NA	ENSG00000015568
ENSG00000015592	ENSG00000015592	1.27946	-0.218637	1.43099	-0.152787	0.878566	NA	ENSG00000015592	81551	STMN4	8	27235323	27258420	-1	protein_coding	stathmin 4 [Source:HGNC Symbol;Acc:HGNC:16078]	NA	NA	NA	ENSG00000015592
ENSG00000015676	ENSG00000015676	2493.16	-0.762093	0.242516	-3.14244	0.00167546	0.0108855	ENSG00000015676	23386	NUDCD3	7	44379121	44490880	-1	protein_coding	NudC domain containing 3 [Source:HGNC Symbol;Acc:HGNC:22208]	microtubule family cytoskeletal protein(PC00157)	NA	NA	ENSG00000015676
ENSG00000016082	ENSG00000016082	2.40505	-0.920448	0.87642	-1.05024	0.293609	0.492237	ENSG00000016082	3670	ISL1	5	51383391	51394738	1	protein_coding	ISL LIM homeobox 1 [Source:HGNC Symbol;Acc:HGNC:6132]	homeodomain transcription factor(PC00119)	nucleic acid binding(PC00171)	zinc finger transcription factor(PC00244)	ENSG00000016082
ENSG00000016391	ENSG00000016391	84.3701	-0.329536	0.270034	-1.22035	0.222333	0.410099	ENSG00000016391	55349	CHDH	3	53812335	53846390	-1	protein_coding	choline dehydrogenase [Source:HGNC Symbol;Acc:HGNC:24288]	dehydrogenase(PC00092)	NA	NA	ENSG00000016391
ENSG00000016402	ENSG00000016402	4.59066	-0.680524	1.0104	-0.673521	0.500616	0.681616	ENSG00000016402	53832	IL20RA	6	136999971	137045180	-1	protein_coding	interleukin 20 receptor subunit alpha [Source:HGNC Symbol;Acc:HGNC:6003]	defense/immunity protein(PC00090)	type I cytokine receptor(PC00231)	type II cytokine receptor(PC00232)	ENSG00000016402
ENSG00000016490	ENSG00000016490	0	NA	NA	NA	NA	NA	ENSG00000016490	1179	CLCA1	1	86468368	86500289	1	protein_coding	chloride channel accessory 1 [Source:HGNC Symbol;Acc:HGNC:2015]	ion channel(PC00133)	metalloprotease(PC00153)	NA	ENSG00000016490
ENSG00000016602	ENSG00000016602	0	NA	NA	NA	NA	NA	ENSG00000016602	22802	CLCA4	1	86547078	86580754	1	protein_coding	chloride channel accessory 4 [Source:HGNC Symbol;Acc:HGNC:2018]	ion channel(PC00133)	metalloprotease(PC00153)	NA	ENSG00000016602
ENSG00000016864	ENSG00000016864	1068.64	0.335596	0.148245	2.26379	0.0235872	0.0852443	ENSG00000016864	55830	GLT8D1	3	52694488	52706032	-1	protein_coding	glycosyltransferase 8 domain containing 1 [Source:HGNC Symbol;Acc:HGNC:24870]	NA	NA	NA	ENSG00000016864
ENSG00000017260	ENSG00000017260	2391.39	0.0665077	0.179438	0.370646	0.710902	0.836316	ENSG00000017260	27032	ATP2C1	3	130850595	131016712	1	protein_coding	ATPase secretory pathway Ca2+ transporting 1 [Source:HGNC Symbol;Acc:HGNC:13211]	cation transporter(PC00068)	hydrolase(PC00121)	ion channel(PC00133)	ENSG00000017260
ENSG00000017427	ENSG00000017427	3.13381	-1.14201	1.11434	-1.02483	0.305442	0.504049	ENSG00000017427	3479	IGF1	12	102395867	102480645	-1	protein_coding	insulin like growth factor 1 [Source:HGNC Symbol;Acc:HGNC:5464]	NA	NA	NA	ENSG00000017427
ENSG00000017483	ENSG00000017483	15.2001	0.234131	0.691823	0.338426	0.735042	0.851832	ENSG00000017483	92745	SLC38A5	X	48458537	48470256	-1	protein_coding	solute carrier family 38 member 5 [Source:HGNC Symbol;Acc:HGNC:18070]	amino acid transporter(PC00046)	NA	NA	ENSG00000017483
ENSG00000017797	ENSG00000017797	3447.09	-0.0531886	0.345534	-0.153932	0.877663	0.936509	ENSG00000017797	10928	RALBP1	18	9475009	9538116	1	protein_coding	ralA binding protein 1 [Source:HGNC Symbol;Acc:HGNC:9841]	G-protein modulator(PC00022)	NA	NA	ENSG00000017797
ENSG00000018189	ENSG00000018189	1392.22	0.783452	0.287535	2.72471	0.0064357	0.0316096	ENSG00000018189	22902	RUFY3	4	70704204	70807315	1	protein_coding	RUN and FYVE domain containing 3 [Source:HGNC Symbol;Acc:HGNC:30285]	NA	NA	NA	ENSG00000018189
ENSG00000018236	ENSG00000018236	571.533	-3.65385	0.770007	-4.74521	NA	NA	ENSG00000018236	1272	CNTN1	12	40692442	41072418	1	protein_coding	contactin 1 [Source:HGNC Symbol;Acc:HGNC:2171]	NA	NA	NA	ENSG00000018236
ENSG00000018280	ENSG00000018280	17.8377	-0.472823	0.56603	-0.835331	0.403531	0.599898	ENSG00000018280	6556	SLC11A1	2	218382029	218396894	1	protein_coding	solute carrier family 11 member 1 [Source:HGNC Symbol;Acc:HGNC:10907]	cation transporter(PC00068)	NA	NA	ENSG00000018280
ENSG00000018408	ENSG00000018408	1163.19	-0.728002	0.36805	-1.978	0.0479292	0.142678	ENSG00000018408	25937	WWTR1	3	149517235	149736714	-1	protein_coding	WW domain containing transcription regulator 1 [Source:HGNC Symbol;Acc:HGNC:24042]	kinase modulator(PC00140)	transcription cofactor(PC00217)	NA	ENSG00000018408
ENSG00000018510	ENSG00000018510	3440.42	-0.461502	0.269216	-1.71424	0.0864844	0.215465	ENSG00000018510	8540	AGPS	2	177392644	177559299	1	protein_coding	alkylglycerone phosphate synthase [Source:HGNC Symbol;Acc:HGNC:327]	NA	NA	NA	ENSG00000018510
ENSG00000018607	ENSG00000018607	0.418119	1.46508	2.44977	0.598049	0.549807	NA	ENSG00000018607	NA	ZNF806	2	132309309	132318736	1	unprocessed_pseudogene	zinc finger protein 806 [Source:HGNC Symbol;Acc:HGNC:33228]	NA	NA	NA	ENSG00000018607
ENSG00000018610	ENSG00000018610	328.512	-0.141976	0.191841	-0.74007	0.459258	0.647617	ENSG00000018610	63932	CXorf56	X	119538149	119565408	-1	protein_coding	chromosome X open reading frame 56 [Source:HGNC Symbol;Acc:HGNC:26239]	NA	NA	NA	ENSG00000018610
ENSG00000018625	ENSG00000018625	38.5119	0.460723	0.331889	1.38819	0.16508	0.336855	ENSG00000018625	477	ATP1A2	1	160115759	160143591	1	protein_coding	ATPase Na+/K+ transporting subunit alpha 2 [Source:HGNC Symbol;Acc:HGNC:800]	cation transporter(PC00068)	hydrolase(PC00121)	ion channel(PC00133)	ENSG00000018625
ENSG00000018699	ENSG00000018699	659.504	0.455694	0.157981	2.88449	0.00392049	0.0214292	ENSG00000018699	55622	TTC27	2	32628032	32821051	1	protein_coding	tetratricopeptide repeat domain 27 [Source:HGNC Symbol;Acc:HGNC:25986]	NA	NA	NA	ENSG00000018699
ENSG00000018869	ENSG00000018869	42.8752	-0.628302	0.35113	-1.78937	0.0735548	0.192971	ENSG00000018869	147948	ZNF582	19	56375846	56393545	-1	protein_coding	zinc finger protein 582 [Source:HGNC Symbol;Acc:HGNC:26421]	KRAB box transcription factor(PC00029)	NA	NA	ENSG00000018869
ENSG00000019102	ENSG00000019102	0.457711	1.71802	2.45286	0.700416	0.483668	NA	ENSG00000019102	23584	VSIG2	11	124747472	124752238	-1	protein_coding	V-set and immunoglobulin domain containing 2 [Source:HGNC Symbol;Acc:HGNC:17149]	NA	NA	NA	ENSG00000019102
ENSG00000019144	ENSG00000019144	3551.85	0.334548	0.184969	1.80867	0.0705018	0.187372	ENSG00000019144	23187	PHLDB1	11	118606440	118658038	1	protein_coding	pleckstrin homology like domain family B member 1 [Source:HGNC Symbol;Acc:HGNC:23697]	NA	NA	NA	ENSG00000019144
ENSG00000019169	ENSG00000019169	147.625	1.78934	0.272831	6.55841	5.43838e-11	2.91276e-09	ENSG00000019169	8685	MARCO	2	118942166	118994660	1	protein_coding	macrophage receptor with collagenous structure [Source:HGNC Symbol;Acc:HGNC:6895]	NA	NA	NA	ENSG00000019169
ENSG00000019186	ENSG00000019186	362.821	0.600315	0.43138	1.39161	0.164039	0.335375	ENSG00000019186	1591	CYP24A1	20	54153449	54173973	-1	protein_coding	cytochrome P450 family 24 subfamily A member 1 [Source:HGNC Symbol;Acc:HGNC:2602]	oxygenase(PC00177)	NA	NA	ENSG00000019186
ENSG00000019485	ENSG00000019485	353.486	-0.362254	0.199645	-1.81449	0.0696023	0.185802	ENSG00000019485	56981	PRDM11	11	45095806	45235110	1	protein_coding	PR/SET domain 11 [Source:HGNC Symbol;Acc:HGNC:13996]	NA	NA	NA	ENSG00000019485
ENSG00000019505	ENSG00000019505	8.53071	2.97506	0.911507	3.26389	0.00109893	0.00779054	ENSG00000019505	57586	SYT13	11	45240301	45286319	-1	protein_coding	synaptotagmin 13 [Source:HGNC Symbol;Acc:HGNC:14962]	membrane trafficking regulatory protein(PC00151)	NA	NA	ENSG00000019505
ENSG00000019549	ENSG00000019549	365.784	-0.398881	0.43671	-0.913377	0.361044	0.559283	ENSG00000019549	6591	SNAI2	8	48917768	48921740	-1	protein_coding	snail family transcriptional repressor 2 [Source:HGNC Symbol;Acc:HGNC:11094]	NA	NA	NA	ENSG00000019549
ENSG00000019582	ENSG00000019582	1.56659	-0.787326	1.48373	-0.530639	0.595669	NA	ENSG00000019582	972	CD74	5	150401637	150412929	-1	protein_coding	CD74 molecule [Source:HGNC Symbol;Acc:HGNC:1697]	protease inhibitor(PC00191)	NA	NA	ENSG00000019582
ENSG00000019991	ENSG00000019991	1.11155	1.91787	1.92591	0.995825	0.319335	NA	ENSG00000019991	3082	HGF	7	81699006	81770438	-1	protein_coding	hepatocyte growth factor [Source:HGNC Symbol;Acc:HGNC:4893]	serine protease(PC00203)	NA	NA	ENSG00000019991
ENSG00000019995	ENSG00000019995	1689.39	-0.384314	0.133226	-2.88468	0.00391806	0.0214205	ENSG00000019995	54764	ZRANB1	10	124942123	124988189	1	protein_coding	zinc finger RANBP2-type containing 1 [Source:HGNC Symbol;Acc:HGNC:18224]	cysteine protease(PC00081)	NA	NA	ENSG00000019995
ENSG00000020129	ENSG00000020129	664.423	0.100123	0.217456	0.460428	0.645209	0.792573	ENSG00000020129	23154	NCDN	1	35557473	35567274	1	protein_coding	neurochondrin [Source:HGNC Symbol;Acc:HGNC:17597]	NA	NA	NA	ENSG00000020129
ENSG00000020181	ENSG00000020181	472.239	-0.686782	0.309676	-2.21774	0.0265725	0.0932057	ENSG00000020181	25960	ADGRA2	8	37784191	37844896	1	protein_coding	adhesion G protein-coupled receptor A2 [Source:HGNC Symbol;Acc:HGNC:17849]	NA	NA	NA	ENSG00000020181
ENSG00000020219	ENSG00000020219	0	NA	NA	NA	NA	NA	ENSG00000020219	NA	CCT8L1P	7	152445477	152447150	1	processed_pseudogene	chaperonin containing TCP1 subunit 8 like 1, pseudogene [Source:HGNC Symbol;Acc:HGNC:32153]	NA	NA	NA	ENSG00000020219
ENSG00000020256	ENSG00000020256	861.569	0.278059	0.184844	1.5043	0.132505	0.290144	ENSG00000020256	55734	ZFP64	20	52051663	52204308	-1	protein_coding	ZFP64 zinc finger protein [Source:HGNC Symbol;Acc:HGNC:15940]	KRAB box transcription factor(PC00029)	NA	NA	ENSG00000020256
ENSG00000020426	ENSG00000020426	910.958	-0.177855	0.169816	-1.04734	0.294943	0.493654	ENSG00000020426	4331	MNAT1	14	60734742	60969953	1	protein_coding	MNAT1, CDK activating kinase assembly factor [Source:HGNC Symbol;Acc:HGNC:7181]	kinase activator(PC00138)	transcription factor(PC00218)	NA	ENSG00000020426
ENSG00000020577	ENSG00000020577	3383	0.366246	0.120364	3.04281	0.00234379	0.0142396	ENSG00000020577	23034	SAMD4A	14	54567097	54793315	1	protein_coding	sterile alpha motif domain containing 4A [Source:HGNC Symbol;Acc:HGNC:23023]	NA	NA	NA	ENSG00000020577
ENSG00000020633	ENSG00000020633	148.273	-0.231089	0.308701	-0.748586	0.454107	0.643344	ENSG00000020633	864	RUNX3	1	24899511	24965121	-1	protein_coding	runt related transcription factor 3 [Source:HGNC Symbol;Acc:HGNC:10473]	Runt transcription factor(PC00254)	nucleic acid binding(PC00171)	NA	ENSG00000020633
ENSG00000020922	ENSG00000020922	1204.25	0.200336	0.16717	1.1984	0.230761	0.420508	ENSG00000020922	4361	MRE11	11	94415578	94493908	-1	protein_coding	MRE11 homolog, double strand break repair nuclease [Source:HGNC Symbol;Acc:HGNC:7230]	NA	NA	NA	ENSG00000020922
ENSG00000021300	ENSG00000021300	136.655	-0.0419317	0.425466	-0.0985549	0.921492	0.960552	ENSG00000021300	58473	PLEKHB1	11	73646178	73662819	1	protein_coding	pleckstrin homology domain containing B1 [Source:HGNC Symbol;Acc:HGNC:19079]	NA	NA	NA	ENSG00000021300
ENSG00000021355	ENSG00000021355	593.422	-0.471896	0.314511	-1.50041	0.133507	0.291457	ENSG00000021355	1992	SERPINB1	6	2832332	2842006	-1	protein_coding	serpin family B member 1 [Source:HGNC Symbol;Acc:HGNC:3311]	serine protease inhibitor(PC00204)	NA	NA	ENSG00000021355
ENSG00000021461	ENSG00000021461	1.99716	0.713614	1.38154	0.516534	0.605481	0.763496	ENSG00000021461	64816	CYP3A43	7	99828013	99866102	1	protein_coding	cytochrome P450 family 3 subfamily A member 43 [Source:HGNC Symbol;Acc:HGNC:17450]	oxygenase(PC00177)	NA	NA	ENSG00000021461
ENSG00000021488	ENSG00000021488	8.9489	0.604101	0.696957	0.86677	0.386068	0.583581	ENSG00000021488	11136	SLC7A9	19	32830509	32869766	-1	protein_coding	solute carrier family 7 member 9 [Source:HGNC Symbol;Acc:HGNC:11067]	NA	NA	NA	ENSG00000021488
ENSG00000021574	ENSG00000021574	896.947	-0.756966	0.332479	-2.27674	0.022802	0.0831675	ENSG00000021574	6683	SPAST	2	32063611	32157637	1	protein_coding	spastin [Source:HGNC Symbol;Acc:HGNC:11233]	non-motor microtubule binding protein(PC00166)	NA	NA	ENSG00000021574
ENSG00000021645	ENSG00000021645	274.603	-0.0521098	0.15715	-0.331593	0.740197	0.854664	ENSG00000021645	9369	NRXN3	14	78170373	79868290	1	protein_coding	neurexin 3 [Source:HGNC Symbol;Acc:HGNC:8010]	NA	NA	NA	ENSG00000021645
ENSG00000021762	ENSG00000021762	728.494	0.12083	0.172785	0.699307	0.48436	0.668029	ENSG00000021762	114879	OSBPL5	11	3087116	3166739	-1	protein_coding	oxysterol binding protein like 5 [Source:HGNC Symbol;Acc:HGNC:16392]	NA	NA	NA	ENSG00000021762
ENSG00000021776	ENSG00000021776	1319.2	0.413671	0.202509	2.04273	0.0410791	0.127624	ENSG00000021776	9716	AQR	15	34851782	34969839	-1	protein_coding	aquarius intron-binding spliceosomal factor [Source:HGNC Symbol;Acc:HGNC:29513]	DNA helicase(PC00011)	RNA helicase(PC00032)	endoribonuclease(PC00094)	ENSG00000021776
ENSG00000021826	ENSG00000021826	814.693	-0.303768	0.212569	-1.42903	0.152996	0.319754	ENSG00000021826	1373	CPS1	2	210477682	210679107	1	protein_coding	carbamoyl-phosphate synthase 1 [Source:HGNC Symbol;Acc:HGNC:2323]	cysteine protease(PC00081)	ligase(PC00142)	metalloprotease(PC00153)	ENSG00000021826
ENSG00000021852	ENSG00000021852	0	NA	NA	NA	NA	NA	ENSG00000021852	732	C8B	1	56929210	56966140	-1	protein_coding	complement C8 beta chain [Source:HGNC Symbol;Acc:HGNC:1353]	NA	NA	NA	ENSG00000021852
ENSG00000022267	ENSG00000022267	2866.68	0.204578	0.221089	0.925318	0.354801	0.552978	ENSG00000022267	2273	FHL1	X	136146702	136211359	1	protein_coding	four and a half LIM domains 1 [Source:HGNC Symbol;Acc:HGNC:3702]	NA	NA	NA	ENSG00000022267
ENSG00000022277	ENSG00000022277	2517.06	-0.00695127	0.195248	-0.0356022	0.9716	0.986688	ENSG00000022277	51507	RTFDC1	20	56468585	56519449	1	protein_coding	replication termination factor 2 domain containing 1 [Source:HGNC Symbol;Acc:HGNC:15890]	NA	NA	NA	ENSG00000022277
ENSG00000022355	ENSG00000022355	17.1502	1.04635	0.63194	1.65578	0.0977664	0.234803	ENSG00000022355	2554	GABRA1	5	161847063	161899981	1	protein_coding	gamma-aminobutyric acid type A receptor alpha1 subunit [Source:HGNC Symbol;Acc:HGNC:4075]	GABA receptor(PC00023)	acetylcholine receptor(PC00037)	NA	ENSG00000022355
ENSG00000022556	ENSG00000022556	174.698	4.85795	0.399276	12.1669	4.66611e-34	3.37027e-31	ENSG00000022556	55655	NLRP2	19	54953130	55001142	1	protein_coding	NLR family pyrin domain containing 2 [Source:HGNC Symbol;Acc:HGNC:22948]	NA	NA	NA	ENSG00000022556
ENSG00000022567	ENSG00000022567	223.988	-0.0489219	0.293008	-0.166965	0.867398	0.930485	ENSG00000022567	57210	SLC45A4	8	141207166	141308305	-1	protein_coding	solute carrier family 45 member 4 [Source:HGNC Symbol;Acc:HGNC:29196]	carbohydrate transporter(PC00067)	NA	NA	ENSG00000022567
ENSG00000022840	ENSG00000022840	2583.78	0.35279	0.11182	3.15499	0.00160502	0.0105171	ENSG00000022840	9921	RNF10	12	120533480	120577594	1	protein_coding	ring finger protein 10 [Source:HGNC Symbol;Acc:HGNC:10055]	NA	NA	NA	ENSG00000022840
ENSG00000022976	ENSG00000022976	107.401	0.720562	0.437534	1.64687	0.0995848	0.237995	ENSG00000022976	55778	ZNF839	14	102317377	102342702	1	protein_coding	zinc finger protein 839 [Source:HGNC Symbol;Acc:HGNC:20345]	NA	NA	NA	ENSG00000022976
ENSG00000023041	ENSG00000023041	1297.06	0.285151	0.341117	0.835934	0.403192	0.59957	ENSG00000023041	64429	ZDHHC6	10	112424428	112446917	-1	protein_coding	zinc finger DHHC-type containing 6 [Source:HGNC Symbol;Acc:HGNC:19160]	NA	NA	NA	ENSG00000023041
ENSG00000023171	ENSG00000023171	292.234	1.20481	0.359212	3.35402	0.000796467	0.00601215	ENSG00000023171	57476	GRAMD1B	11	123358428	123627774	1	protein_coding	GRAM domain containing 1B [Source:HGNC Symbol;Acc:HGNC:29214]	NA	NA	NA	ENSG00000023171
ENSG00000023191	ENSG00000023191	1526.88	0.114307	0.158905	0.719338	0.471932	0.657739	ENSG00000023191	6050	RNH1	11	494512	507300	-1	protein_coding	ribonuclease/angiogenin inhibitor 1 [Source:HGNC Symbol;Acc:HGNC:10074]	nucleic acid binding(PC00171)	transcription cofactor(PC00217)	NA	ENSG00000023191
ENSG00000023228	ENSG00000023228	2659.61	0.0378065	0.227698	0.166038	0.868127	0.930873	ENSG00000023228	4719	NDUFS1	2	206114817	206159603	-1	protein_coding	NADH:ubiquinone oxidoreductase core subunit S1 [Source:HGNC Symbol;Acc:HGNC:7707]	dehydrogenase(PC00092)	reductase(PC00198)	NA	ENSG00000023228
ENSG00000023287	ENSG00000023287	2815.28	0.0872052	0.244812	0.356212	0.721682	0.843541	ENSG00000023287	9821	RB1CC1	8	52622456	52745843	-1	protein_coding	RB1 inducible coiled-coil 1 [Source:HGNC Symbol;Acc:HGNC:15574]	NA	NA	NA	ENSG00000023287
ENSG00000023318	ENSG00000023318	2194.49	0.893787	0.269297	3.31896	0.000903518	0.00666305	ENSG00000023318	23071	ERP44	9	99979179	100099040	-1	protein_coding	endoplasmic reticulum protein 44 [Source:HGNC Symbol;Acc:HGNC:18311]	NA	NA	NA	ENSG00000023318
ENSG00000023330	ENSG00000023330	1412.06	0.643575	0.146426	4.39522	1.10663e-05	0.000168224	ENSG00000023330	211	ALAS1	3	52198086	52214327	1	protein_coding	5'-aminolevulinate synthase 1 [Source:HGNC Symbol;Acc:HGNC:396]	transferase(PC00220)	NA	NA	ENSG00000023330
ENSG00000023445	ENSG00000023445	1393.43	3.82808	0.254621	15.0344	4.37048e-51	8.49889e-48	ENSG00000023445	330	BIRC3	11	102317450	102339403	1	protein_coding	baculoviral IAP repeat containing 3 [Source:HGNC Symbol;Acc:HGNC:591]	protease inhibitor(PC00191)	NA	NA	ENSG00000023445
ENSG00000023516	ENSG00000023516	1386.81	-0.260172	0.200589	-1.29704	0.194618	0.375855	ENSG00000023516	11215	AKAP11	13	42272153	42323267	1	protein_coding	A-kinase anchoring protein 11 [Source:HGNC Symbol;Acc:HGNC:369]	NA	NA	NA	ENSG00000023516
ENSG00000023572	ENSG00000023572	80.7971	1.03771	0.262573	3.9521	7.74684e-05	0.000890587	ENSG00000023572	51022	GLRX2	1	193096468	193106114	-1	protein_coding	glutaredoxin 2 [Source:HGNC Symbol;Acc:HGNC:16065]	NA	NA	NA	ENSG00000023572
ENSG00000023608	ENSG00000023608	3346.38	-0.281942	0.150368	-1.87501	0.060792	0.169272	ENSG00000023608	6617	SNAPC1	14	61762357	61796428	1	protein_coding	small nuclear RNA activating complex polypeptide 1 [Source:HGNC Symbol;Acc:HGNC:11134]	NA	NA	NA	ENSG00000023608
ENSG00000023697	ENSG00000023697	919.407	-0.586089	0.251048	-2.33457	0.0195657	0.0740896	ENSG00000023697	51071	DERA	12	15911172	16037282	1	protein_coding	deoxyribose-phosphate aldolase [Source:HGNC Symbol;Acc:HGNC:24269]	aldolase(PC00044)	NA	NA	ENSG00000023697
ENSG00000023734	ENSG00000023734	4798.56	0.221546	0.103135	2.14811	0.0317047	0.105585	ENSG00000023734	11171	STRAP	12	15882391	15903478	1	protein_coding	serine/threonine kinase receptor associated protein [Source:HGNC Symbol;Acc:HGNC:30796]	NA	NA	NA	ENSG00000023734
ENSG00000023839	ENSG00000023839	126.522	2.10066	0.535302	3.92425	8.69989e-05	0.000983162	ENSG00000023839	1244	ABCC2	10	99782732	99852192	1	protein_coding	ATP binding cassette subfamily C member 2 [Source:HGNC Symbol;Acc:HGNC:53]	ATP-binding cassette (ABC) transporter(PC00003)	NA	NA	ENSG00000023839
ENSG00000023892	ENSG00000023892	103.934	3.60571	0.400786	8.9966	2.32811e-19	4.23415e-17	ENSG00000023892	50619	DEF6	6	35297852	35321771	1	protein_coding	DEF6, guanine nucleotide exchange factor [Source:HGNC Symbol;Acc:HGNC:2760]	nucleic acid binding(PC00171)	NA	NA	ENSG00000023892
ENSG00000023902	ENSG00000023902	814.427	0.253244	0.136769	1.85162	0.06408	0.175489	ENSG00000023902	51177	PLEKHO1	1	150149183	150164720	1	protein_coding	pleckstrin homology domain containing O1 [Source:HGNC Symbol;Acc:HGNC:24310]	NA	NA	NA	ENSG00000023902
ENSG00000023909	ENSG00000023909	807.203	0.572565	0.251355	2.27791	0.0227318	0.0829715	ENSG00000023909	2730	GCLM	1	93885205	93909456	-1	protein_coding	glutamate-cysteine ligase modifier subunit [Source:HGNC Symbol;Acc:HGNC:4312]	ligase(PC00142)	NA	NA	ENSG00000023909
ENSG00000024048	ENSG00000024048	1066.2	0.745984	0.0835956	8.92372	4.50882e-19	7.72636e-17	ENSG00000024048	23304	UBR2	6	42564062	42693504	1	protein_coding	ubiquitin protein ligase E3 component n-recognin 2 [Source:HGNC Symbol;Acc:HGNC:21289]	NA	NA	NA	ENSG00000024048
ENSG00000024422	ENSG00000024422	839.692	-0.739678	0.4149	-1.78279	0.0746211	0.194979	ENSG00000024422	30846	EHD2	19	47713343	47743134	1	protein_coding	EH domain containing 2 [Source:HGNC Symbol;Acc:HGNC:3243]	G-protein modulator(PC00022)	calcium-binding protein(PC00060)	membrane traffic protein(PC00150)	ENSG00000024422
ENSG00000024526	ENSG00000024526	2020.01	-0.463056	0.143014	-3.23785	0.00120436	0.00837126	ENSG00000024526	55635	DEPDC1	1	68474152	68497221	-1	protein_coding	DEP domain containing 1 [Source:HGNC Symbol;Acc:HGNC:22949]	nucleic acid binding(PC00171)	NA	NA	ENSG00000024526
ENSG00000024862	ENSG00000024862	234.365	-0.117866	0.251615	-0.468437	0.639472	0.788475	ENSG00000024862	25901	CCDC28A	6	138773509	138793319	1	protein_coding	coiled-coil domain containing 28A [Source:HGNC Symbol;Acc:HGNC:21098]	receptor(PC00197)	NA	NA	ENSG00000024862
ENSG00000025039	ENSG00000025039	426.055	-0.239107	0.367258	-0.65106	0.515008	0.694336	ENSG00000025039	58528	RRAGD	6	89364636	89412270	-1	protein_coding	Ras related GTP binding D [Source:HGNC Symbol;Acc:HGNC:19903]	small GTPase(PC00208)	NA	NA	ENSG00000025039
ENSG00000025156	ENSG00000025156	772.472	-0.0277092	0.19625	-0.141193	0.887717	0.941615	ENSG00000025156	3298	HSF2	6	122399546	122433119	1	protein_coding	heat shock transcription factor 2 [Source:HGNC Symbol;Acc:HGNC:5225]	winged helix/forkhead transcription factor(PC00246)	NA	NA	ENSG00000025156
ENSG00000025293	ENSG00000025293	847.08	0.0915701	0.1422	0.643953	0.519606	0.697999	ENSG00000025293	51230	PHF20	20	35771974	35950381	1	protein_coding	PHD finger protein 20 [Source:HGNC Symbol;Acc:HGNC:16098]	NA	NA	NA	ENSG00000025293
ENSG00000025423	ENSG00000025423	34.1581	1.5385	0.478266	3.21682	0.00129618	0.00885845	ENSG00000025423	8630	HSD17B6	12	56752161	56787790	1	protein_coding	hydroxysteroid 17-beta dehydrogenase 6 [Source:HGNC Symbol;Acc:HGNC:23316]	dehydrogenase(PC00092)	reductase(PC00198)	NA	ENSG00000025423
ENSG00000025434	ENSG00000025434	162.501	0.294282	0.25694	1.14533	0.252071	0.445059	ENSG00000025434	10062	NR1H3	11	47248300	47269032	1	protein_coding	nuclear receptor subfamily 1 group H member 3 [Source:HGNC Symbol;Acc:HGNC:7966]	C4 zinc finger nuclear receptor(PC00169)	nucleic acid binding(PC00171)	receptor(PC00197)	ENSG00000025434
ENSG00000025708	ENSG00000025708	11.9691	-0.440799	0.845641	-0.52126	0.602186	0.761201	ENSG00000025708	1890	TYMP	22	50525752	50530056	-1	protein_coding	thymidine phosphorylase [Source:HGNC Symbol;Acc:HGNC:3148]	glycosyltransferase(PC00111)	NA	NA	ENSG00000025708
ENSG00000025770	ENSG00000025770	1499.81	0.215038	0.321852	0.668127	0.504052	0.684783	ENSG00000025770	29781	NCAPH2	22	50508216	50523472	1	protein_coding	non-SMC condensin II complex subunit H2 [Source:HGNC Symbol;Acc:HGNC:25071]	NA	NA	NA	ENSG00000025770
ENSG00000025772	ENSG00000025772	2367.96	0.397819	0.148126	2.68569	0.00723805	0.0345591	ENSG00000025772	10953	TOMM34	20	44942130	44960486	-1	protein_coding	translocase of outer mitochondrial membrane 34 [Source:HGNC Symbol;Acc:HGNC:15746]	NA	NA	NA	ENSG00000025772
ENSG00000025796	ENSG00000025796	1919.73	0.333512	0.196157	1.70023	0.0890874	0.219913	ENSG00000025796	11231	SEC63	6	107867756	107958189	-1	protein_coding	SEC63 homolog, protein translocation regulator [Source:HGNC Symbol;Acc:HGNC:21082]	chaperone(PC00072)	NA	NA	ENSG00000025796
ENSG00000025800	ENSG00000025800	2368.45	-0.217068	0.348317	-0.623191	0.533159	0.709233	ENSG00000025800	23633	KPNA6	1	32108038	32176568	1	protein_coding	karyopherin subunit alpha 6 [Source:HGNC Symbol;Acc:HGNC:6399]	transfer/carrier protein(PC00219)	NA	NA	ENSG00000025800
ENSG00000026025	ENSG00000026025	34044.2	0.0400971	0.120122	0.333803	0.738528	0.853971	ENSG00000026025	7431	VIM	10	17228259	17237593	1	protein_coding	vimentin [Source:HGNC Symbol;Acc:HGNC:12692]	NA	NA	NA	ENSG00000026025
ENSG00000026036	ENSG00000026036	284.682	1.29771	0.526869	2.46305	0.0137759	0.0566546	ENSG00000026036	NA	RTEL1-TNFRSF6B	20	63659300	63698684	1	protein_coding	RTEL1-TNFRSF6B readthrough (NMD candidate) [Source:HGNC Symbol;Acc:HGNC:44095]	DNA helicase(PC00011)	NA	NA	ENSG00000026036
ENSG00000026103	ENSG00000026103	1409.56	0.473431	0.239554	1.9763	0.0481211	0.14305	ENSG00000026103	355	FAS	10	88990582	89015785	1	protein_coding	Fas cell surface death receptor [Source:HGNC Symbol;Acc:HGNC:11920]	NA	NA	NA	ENSG00000026103
ENSG00000026297	ENSG00000026297	354.45	1.36098	0.242354	5.61567	1.95799e-08	6.24185e-07	ENSG00000026297	8635	RNASET2	6	166929504	166957191	-1	protein_coding	ribonuclease T2 [Source:HGNC Symbol;Acc:HGNC:21686]	NA	NA	NA	ENSG00000026297
ENSG00000026508	ENSG00000026508	6660.16	1.09218	0.239373	4.56268	5.0504e-06	8.51161e-05	ENSG00000026508	960	CD44	11	35138870	35232402	1	protein_coding	CD44 molecule (Indian blood group) [Source:HGNC Symbol;Acc:HGNC:1681]	NA	NA	NA	ENSG00000026508
ENSG00000026559	ENSG00000026559	391.853	0.00968863	0.218411	0.0443597	0.964618	0.982614	ENSG00000026559	3755	KCNG1	20	51003656	51023129	-1	protein_coding	potassium voltage-gated channel modifier subfamily G member 1 [Source:HGNC Symbol;Acc:HGNC:6248]	NA	NA	NA	ENSG00000026559
ENSG00000026652	ENSG00000026652	605.247	0.733867	0.215581	3.40414	0.000663715	0.00519948	ENSG00000026652	56895	AGPAT4	6	161129979	161274061	-1	protein_coding	1-acylglycerol-3-phosphate O-acyltransferase 4 [Source:HGNC Symbol;Acc:HGNC:20885]	NA	NA	NA	ENSG00000026652
ENSG00000026751	ENSG00000026751	332.902	0.452406	0.266846	1.69538	0.0900037	0.221483	ENSG00000026751	57823	SLAMF7	1	160739057	160754821	1	protein_coding	SLAM family member 7 [Source:HGNC Symbol;Acc:HGNC:21394]	cell adhesion molecule(PC00069)	immunoglobulin receptor superfamily(PC00124)	membrane-bound signaling molecule(PC00152)	ENSG00000026751
ENSG00000026950	ENSG00000026950	262.787	0.212844	0.228147	0.932926	0.350858	0.549037	ENSG00000026950	11119	BTN3A1	6	26402237	26415216	1	protein_coding	butyrophilin subfamily 3 member A1 [Source:HGNC Symbol;Acc:HGNC:1138]	protease inhibitor(PC00191)	NA	NA	ENSG00000026950
ENSG00000027001	ENSG00000027001	299.046	0.65473	0.214306	3.05512	0.00224972	0.0137582	ENSG00000027001	4285	MIPEP	13	23730189	23889419	-1	protein_coding	mitochondrial intermediate peptidase [Source:HGNC Symbol;Acc:HGNC:7104]	metalloprotease(PC00153)	NA	NA	ENSG00000027001
ENSG00000027075	ENSG00000027075	937.878	-0.4989	0.432456	-1.15364	0.248647	0.441355	ENSG00000027075	5583	PRKCH	14	61187559	61550976	1	protein_coding	protein kinase C eta [Source:HGNC Symbol;Acc:HGNC:9403]	annexin(PC00050)	calmodulin(PC00061)	non-receptor serine/threonine protein kinase(PC00167)	ENSG00000027075
ENSG00000027644	ENSG00000027644	7.13323	0.190048	0.6497	0.292516	0.769892	0.874512	ENSG00000027644	3645	INSRR	1	156840063	156859018	-1	protein_coding	insulin receptor related receptor [Source:HGNC Symbol;Acc:HGNC:6093]	NA	NA	NA	ENSG00000027644
ENSG00000027697	ENSG00000027697	870.058	0.330074	0.153364	2.15223	0.0313796	0.104839	ENSG00000027697	3459	IFNGR1	6	137197484	137219449	-1	protein_coding	interferon gamma receptor 1 [Source:HGNC Symbol;Acc:HGNC:5439]	defense/immunity protein(PC00090)	type I cytokine receptor(PC00231)	type II cytokine receptor(PC00232)	ENSG00000027697
ENSG00000027847	ENSG00000027847	413.215	0.347566	0.106133	3.27481	0.00105733	0.00754849	ENSG00000027847	11285	B4GALT7	5	177600100	177610347	1	protein_coding	beta-1,4-galactosyltransferase 7 [Source:HGNC Symbol;Acc:HGNC:930]	NA	NA	NA	ENSG00000027847
ENSG00000027869	ENSG00000027869	6.61089	0.824448	0.778267	1.05934	0.289446	0.487622	ENSG00000027869	9047	SH2D2A	1	156806243	156816862	-1	protein_coding	SH2 domain containing 2A [Source:HGNC Symbol;Acc:HGNC:10821]	NA	NA	NA	ENSG00000027869
ENSG00000028116	ENSG00000028116	1432.07	0.123543	0.153352	0.805614	0.420466	0.614663	ENSG00000028116	7444	VRK2	2	57907651	58159920	1	protein_coding	vaccinia related kinase 2 [Source:HGNC Symbol;Acc:HGNC:12719]	non-receptor serine/threonine protein kinase(PC00167)	NA	NA	ENSG00000028116
ENSG00000028137	ENSG00000028137	16.5818	2.46036	0.64468	3.8164	0.00013541	0.00141278	ENSG00000028137	7133	TNFRSF1B	1	12167003	12209228	1	protein_coding	TNF receptor superfamily member 1B [Source:HGNC Symbol;Acc:HGNC:11917]	NA	NA	NA	ENSG00000028137
ENSG00000028203	ENSG00000028203	980.271	-0.221976	0.127477	-1.7413	0.0816303	0.206941	ENSG00000028203	55591	VEZT	12	95217746	95302790	1	protein_coding	vezatin, adherens junctions transmembrane protein [Source:HGNC Symbol;Acc:HGNC:18258]	NA	NA	NA	ENSG00000028203
ENSG00000028277	ENSG00000028277	179.418	0.512387	0.41608	1.23146	0.21815	0.405473	ENSG00000028277	5452	POU2F2	19	42086110	42196585	-1	protein_coding	POU class 2 homeobox 2 [Source:HGNC Symbol;Acc:HGNC:9213]	NA	NA	NA	ENSG00000028277
ENSG00000028310	ENSG00000028310	872.713	-0.117715	0.223372	-0.52699	0.598201	0.758095	ENSG00000028310	65980	BRD9	5	850291	892824	-1	protein_coding	bromodomain containing 9 [Source:HGNC Symbol;Acc:HGNC:25818]	chromatin/chromatin-binding protein(PC00077)	NA	NA	ENSG00000028310
ENSG00000028528	ENSG00000028528	3616.24	-0.314591	0.177077	-1.77658	0.0756378	0.196744	ENSG00000028528	6642	SNX1	15	64094123	64146090	1	protein_coding	sorting nexin 1 [Source:HGNC Symbol;Acc:HGNC:11172]	membrane trafficking regulatory protein(PC00151)	NA	NA	ENSG00000028528
ENSG00000028839	ENSG00000028839	621.455	0.254201	0.115659	2.19785	0.0279597	0.0965751	ENSG00000028839	9519	TBPL1	6	133952170	133990432	1	protein_coding	TATA-box binding protein like 1 [Source:HGNC Symbol;Acc:HGNC:11589]	TATA-binding transcription factor(PC00255)	nucleic acid binding(PC00171)	NA	ENSG00000028839
ENSG00000029153	ENSG00000029153	1442.16	-0.41312	0.314128	-1.31513	0.188466	0.367445	ENSG00000029153	56938	ARNTL2	12	27332854	27425289	1	protein_coding	aryl hydrocarbon receptor nuclear translocator like 2 [Source:HGNC Symbol;Acc:HGNC:18984]	basic helix-loop-helix transcription factor(PC00055)	NA	NA	ENSG00000029153
ENSG00000029363	ENSG00000029363	4810.05	-0.351499	0.160739	-2.18677	0.0287596	0.0984753	ENSG00000029363	9774	BCLAF1	6	136256627	136289851	-1	protein_coding	BCL2 associated transcription factor 1 [Source:HGNC Symbol;Acc:HGNC:16863]	transcription factor(PC00218)	NA	NA	ENSG00000029363
ENSG00000029364	ENSG00000029364	3142.08	-0.806386	0.121208	-6.65293	2.87319e-11	1.62857e-09	ENSG00000029364	55334	SLC39A9	14	69398015	69462388	1	protein_coding	solute carrier family 39 member 9 [Source:HGNC Symbol;Acc:HGNC:20182]	cation transporter(PC00068)	NA	NA	ENSG00000029364
ENSG00000029534	ENSG00000029534	53.9335	-0.682251	0.35116	-1.94285	0.0520342	0.151407	ENSG00000029534	286	ANK1	8	41653220	41896762	-1	protein_coding	ankyrin 1 [Source:HGNC Symbol;Acc:HGNC:492]	NA	NA	NA	ENSG00000029534
ENSG00000029559	ENSG00000029559	0.117633	0.917077	4.32804	0.211892	0.832191	NA	ENSG00000029559	3381	IBSP	4	87799581	87812435	1	protein_coding	integrin binding sialoprotein [Source:HGNC Symbol;Acc:HGNC:5341]	cell adhesion molecule(PC00069)	extracellular matrix structural protein(PC00103)	structural protein(PC00211)	ENSG00000029559
ENSG00000029639	ENSG00000029639	359.491	0.858115	0.132824	6.46056	1.04314e-10	5.28469e-09	ENSG00000029639	51106	TFB1M	6	155257509	155314493	-1	protein_coding	transcription factor B1, mitochondrial [Source:HGNC Symbol;Acc:HGNC:17037]	RNA methyltransferase(PC00033)	NA	NA	ENSG00000029639
ENSG00000029725	ENSG00000029725	1148.97	0.0363131	0.256031	0.141831	0.887214	0.941464	ENSG00000029725	9135	RABEP1	17	5282265	5385812	1	protein_coding	rabaptin, RAB GTPase binding effector protein 1 [Source:HGNC Symbol;Acc:HGNC:17677]	NA	NA	NA	ENSG00000029725
ENSG00000029993	ENSG00000029993	1647.4	-0.352032	0.117489	-2.99631	0.0027327	0.0161236	ENSG00000029993	3149	HMGB3	X	150980509	150990775	1	protein_coding	high mobility group box 3 [Source:HGNC Symbol;Acc:HGNC:5004]	HMG box transcription factor(PC00024)	chromatin/chromatin-binding protein(PC00077)	signaling molecule(PC00207)	ENSG00000029993
ENSG00000030066	ENSG00000030066	2633.47	-0.134474	0.097783	-1.37523	0.169059	0.342015	ENSG00000030066	23279	NUP160	11	47778087	47848555	-1	protein_coding	nucleoporin 160 [Source:HGNC Symbol;Acc:HGNC:18017]	transporter(PC00227)	NA	NA	ENSG00000030066
ENSG00000030110	ENSG00000030110	893.307	0.487317	0.270327	1.8027	0.0714358	0.189178	ENSG00000030110	578	BAK1	6	33572547	33580293	-1	protein_coding	BCL2 antagonist/killer 1 [Source:HGNC Symbol;Acc:HGNC:949]	signaling molecule(PC00207)	NA	NA	ENSG00000030110
ENSG00000030304	ENSG00000030304	0.0587078	0.917077	4.32804	0.211892	0.832191	NA	ENSG00000030304	4593	MUSK	9	110668771	110801620	1	protein_coding	muscle associated receptor tyrosine kinase [Source:HGNC Symbol;Acc:HGNC:7525]	NA	NA	NA	ENSG00000030304
ENSG00000030419	ENSG00000030419	298.032	-0.353022	0.405848	-0.869836	0.38439	0.582088	ENSG00000030419	22807	IKZF2	2	212999691	213152427	-1	protein_coding	IKAROS family zinc finger 2 [Source:HGNC Symbol;Acc:HGNC:13177]	KRAB box transcription factor(PC00029)	NA	NA	ENSG00000030419
ENSG00000030582	ENSG00000030582	6279.6	0.0367388	0.211517	0.173692	0.862107	0.927013	ENSG00000030582	2896	GRN	17	44345086	44353102	1	protein_coding	granulin precursor [Source:HGNC Symbol;Acc:HGNC:4601]	NA	NA	NA	ENSG00000030582
ENSG00000031003	ENSG00000031003	920.296	-0.432538	0.179572	-2.40871	0.016009	0.0635831	ENSG00000031003	51306	FAM13B	5	137937960	138051961	-1	protein_coding	family with sequence similarity 13 member B [Source:HGNC Symbol;Acc:HGNC:1335]	NA	NA	NA	ENSG00000031003
ENSG00000031081	ENSG00000031081	750.125	-0.747498	0.333587	-2.24079	0.0250397	0.0891553	ENSG00000031081	57514	ARHGAP31	3	119294373	119420714	1	protein_coding	Rho GTPase activating protein 31 [Source:HGNC Symbol;Acc:HGNC:29216]	NA	NA	NA	ENSG00000031081
ENSG00000031691	ENSG00000031691	406.903	-0.120537	0.154244	-0.781467	0.434528	0.627033	ENSG00000031691	55166	CENPQ	6	49463378	49493107	1	protein_coding	centromere protein Q [Source:HGNC Symbol;Acc:HGNC:21347]	NA	NA	NA	ENSG00000031691
ENSG00000031698	ENSG00000031698	4712.51	0.410284	0.169637	2.4186	0.0155804	0.0622231	ENSG00000031698	6301	SARS	1	109213918	109238169	1	protein_coding	seryl-tRNA synthetase [Source:HGNC Symbol;Acc:HGNC:10537]	RNA binding protein(PC00031)	aminoacyl-tRNA synthetase(PC00047)	NA	ENSG00000031698
ENSG00000031823	ENSG00000031823	884.243	-0.336081	0.204251	-1.64543	0.0998804	0.238498	ENSG00000031823	8498	RANBP3	19	5916139	5978142	-1	protein_coding	RAN binding protein 3 [Source:HGNC Symbol;Acc:HGNC:9850]	G-protein modulator(PC00022)	NA	NA	ENSG00000031823
ENSG00000032219	ENSG00000032219	904.932	0.413908	0.231835	1.78536	0.074203	0.194288	ENSG00000032219	5926	ARID4A	14	58298385	58373887	1	protein_coding	AT-rich interaction domain 4A [Source:HGNC Symbol;Acc:HGNC:9885]	transcription cofactor(PC00217)	NA	NA	ENSG00000032219
ENSG00000032389	ENSG00000032389	285.626	-0.332977	0.251308	-1.32498	0.185178	0.363191	ENSG00000032389	7260	EIPR1	2	3188925	3377882	-1	protein_coding	EARP complex and GARP complex interacting protein 1 [Source:HGNC Symbol;Acc:HGNC:12383]	NA	NA	NA	ENSG00000032389
ENSG00000032444	ENSG00000032444	1368.89	1.03866	0.26792	3.87673	0.000105868	0.0011536	ENSG00000032444	10908	PNPLA6	19	7534004	7561764	1	protein_coding	patatin like phospholipase domain containing 6 [Source:HGNC Symbol;Acc:HGNC:16268]	esterase(PC00097)	NA	NA	ENSG00000032444
ENSG00000032742	ENSG00000032742	311.411	0.0785653	0.205962	0.381455	0.702866	0.83065	ENSG00000032742	8100	IFT88	13	20567069	20691437	1	protein_coding	intraflagellar transport 88 [Source:HGNC Symbol;Acc:HGNC:20606]	NA	NA	NA	ENSG00000032742
ENSG00000033011	ENSG00000033011	502.878	-0.0289198	0.317164	-0.0911824	0.927348	0.963795	ENSG00000033011	56052	ALG1	16	5033960	5087379	1	protein_coding	ALG1, chitobiosyldiphosphodolichol beta-mannosyltransferase [Source:HGNC Symbol;Acc:HGNC:18294]	glycosyltransferase(PC00111)	NA	NA	ENSG00000033011
ENSG00000033030	ENSG00000033030	967.169	1.2147	0.421662	2.88073	0.0039675	0.021658	ENSG00000033030	55596	ZCCHC8	12	122471600	122501073	-1	protein_coding	zinc finger CCHC-type containing 8 [Source:HGNC Symbol;Acc:HGNC:25265]	nucleic acid binding(PC00171)	NA	NA	ENSG00000033030
ENSG00000033050	ENSG00000033050	573.665	0.502162	0.302267	1.66132	0.0966492	0.232939	ENSG00000033050	10061	ABCF2	7	151207837	151227230	-1	protein_coding	ATP binding cassette subfamily F member 2 [Source:HGNC Symbol;Acc:HGNC:71]	ATP-binding cassette (ABC) transporter(PC00003)	hydrolase(PC00121)	translation elongation factor(PC00222)	ENSG00000033050
ENSG00000033100	ENSG00000033100	329.528	0.849264	0.182295	4.65874	3.18149e-06	5.67421e-05	ENSG00000033100	54480	CHPF2	7	151232489	151238827	1	protein_coding	chondroitin polymerizing factor 2 [Source:HGNC Symbol;Acc:HGNC:29270]	glycosyltransferase(PC00111)	NA	NA	ENSG00000033100
ENSG00000033122	ENSG00000033122	14.9502	-1.25321	0.383945	-3.26403	0.00109838	0.0077888	ENSG00000033122	57554	LRRC7	1	69568398	70151945	1	protein_coding	leucine rich repeat containing 7 [Source:HGNC Symbol;Acc:HGNC:18531]	NA	NA	NA	ENSG00000033122
ENSG00000033170	ENSG00000033170	1741.8	-0.766753	0.132475	-5.78789	7.12746e-09	2.48185e-07	ENSG00000033170	2530	FUT8	14	65410592	65744121	1	protein_coding	fucosyltransferase 8 [Source:HGNC Symbol;Acc:HGNC:4019]	NA	NA	NA	ENSG00000033170
ENSG00000033178	ENSG00000033178	3317.03	-0.153454	0.262904	-0.583687	0.559431	0.729893	ENSG00000033178	55236	UBA6	4	67612652	67701179	-1	protein_coding	ubiquitin like modifier activating enzyme 6 [Source:HGNC Symbol;Acc:HGNC:25581]	ligase(PC00142)	transfer/carrier protein(PC00219)	NA	ENSG00000033178
ENSG00000033327	ENSG00000033327	613.011	-0.0303413	0.225515	-0.134542	0.892974	0.944116	ENSG00000033327	9846	GAB2	11	78215297	78418348	-1	protein_coding	GRB2 associated binding protein 2 [Source:HGNC Symbol;Acc:HGNC:14458]	transmembrane receptor regulatory/adaptor protein(PC00226)	NA	NA	ENSG00000033327
ENSG00000033627	ENSG00000033627	26.6448	-0.0779004	0.338529	-0.230114	0.818003	0.903382	ENSG00000033627	535	ATP6V0A1	17	42458844	42522611	1	protein_coding	ATPase H+ transporting V0 subunit a1 [Source:HGNC Symbol;Acc:HGNC:865]	ATP synthase(PC00002)	hydrolase(PC00121)	NA	ENSG00000033627
ENSG00000033800	ENSG00000033800	1413.69	0.137307	0.131461	1.04447	0.296267	0.495237	ENSG00000033800	8554	PIAS1	15	68054179	68198603	1	protein_coding	protein inhibitor of activated STAT 1 [Source:HGNC Symbol;Acc:HGNC:2752]	NA	NA	NA	ENSG00000033800
ENSG00000033867	ENSG00000033867	1177.7	0.123237	0.263819	0.467128	0.640408	0.789001	ENSG00000033867	9497	SLC4A7	3	27372721	27484420	-1	protein_coding	solute carrier family 4 member 7 [Source:HGNC Symbol;Acc:HGNC:11033]	cation transporter(PC00068)	NA	NA	ENSG00000033867
ENSG00000034053	ENSG00000034053	463.363	0.673899	0.204529	3.29488	0.000984653	0.00714467	ENSG00000034053	321	APBA2	15	28884483	29118315	1	protein_coding	amyloid beta precursor protein binding family A member 2 [Source:HGNC Symbol;Acc:HGNC:579]	membrane trafficking regulatory protein(PC00151)	NA	NA	ENSG00000034053
ENSG00000034152	ENSG00000034152	1466.84	0.857184	0.164966	5.19614	2.03474e-07	5.04295e-06	ENSG00000034152	5606	MAP2K3	17	21284672	21315240	1	protein_coding	mitogen-activated protein kinase kinase 3 [Source:HGNC Symbol;Acc:HGNC:6843]	NA	NA	NA	ENSG00000034152
ENSG00000034239	ENSG00000034239	6.49775	0.296529	1.04638	0.283387	0.77688	0.878923	ENSG00000034239	79645	EFCAB1	8	48710789	48735311	-1	protein_coding	EF-hand calcium binding domain 1 [Source:HGNC Symbol;Acc:HGNC:25678]	NA	NA	NA	ENSG00000034239
ENSG00000034510	ENSG00000034510	21171.1	-0.00124109	0.162646	-0.00763059	0.993912	0.997463	ENSG00000034510	9168	TMSB10	2	84905625	84906675	1	protein_coding	thymosin beta 10 [Source:HGNC Symbol;Acc:HGNC:11879]	NA	NA	NA	ENSG00000034510
ENSG00000034533	ENSG00000034533	141.659	-0.240422	0.173019	-1.38957	0.16466	0.336209	ENSG00000034533	28990	ASTE1	3	131013875	131027649	-1	protein_coding	asteroid homolog 1 [Source:HGNC Symbol;Acc:HGNC:25021]	NA	NA	NA	ENSG00000034533
ENSG00000034677	ENSG00000034677	1833.89	0.136909	0.273403	0.500759	0.616541	0.771686	ENSG00000034677	25897	RNF19A	8	100257060	100336218	-1	protein_coding	ring finger protein 19A, RBR E3 ubiquitin protein ligase [Source:HGNC Symbol;Acc:HGNC:13432]	ubiquitin-protein ligase(PC00234)	NA	NA	ENSG00000034677
ENSG00000034693	ENSG00000034693	500.493	0.741079	0.232442	3.18823	0.00143145	0.00956315	ENSG00000034693	8504	PEX3	6	143450807	143490010	1	protein_coding	peroxisomal biogenesis factor 3 [Source:HGNC Symbol;Acc:HGNC:8858]	NA	NA	NA	ENSG00000034693
ENSG00000034713	ENSG00000034713	1586.41	0.228663	0.244588	0.934891	0.349844	0.547994	ENSG00000034713	11345	GABARAPL2	16	75566351	75577881	1	protein_coding	GABA type A receptor associated protein like 2 [Source:HGNC Symbol;Acc:HGNC:13291]	non-motor microtubule binding protein(PC00166)	NA	NA	ENSG00000034713
ENSG00000034971	ENSG00000034971	0.116827	0	4.32804	0	1	NA	ENSG00000034971	4653	MYOC	1	171635417	171652683	-1	protein_coding	myocilin [Source:HGNC Symbol;Acc:HGNC:7610]	receptor(PC00197)	structural protein(PC00211)	NA	ENSG00000034971
ENSG00000035115	ENSG00000035115	134.24	0.746475	0.319151	2.33894	0.0193386	0.0734778	ENSG00000035115	26751	SH3YL1	2	217730	266398	-1	protein_coding	SH3 and SYLF domain containing 1 [Source:HGNC Symbol;Acc:HGNC:29546]	non-motor actin binding protein(PC00165)	NA	NA	ENSG00000035115
ENSG00000035141	ENSG00000035141	2118.77	0.0807383	0.175801	0.459258	0.646049	0.793129	ENSG00000035141	84908	FAM136A	2	70295975	70302090	-1	protein_coding	family with sequence similarity 136 member A [Source:HGNC Symbol;Acc:HGNC:25911]	NA	NA	NA	ENSG00000035141
ENSG00000035403	ENSG00000035403	6510.5	-0.171584	0.165294	-1.03805	0.299245	0.497823	ENSG00000035403	7414	VCL	10	73995193	74121363	1	protein_coding	vinculin [Source:HGNC Symbol;Acc:HGNC:12665]	NA	NA	NA	ENSG00000035403
ENSG00000035499	ENSG00000035499	1200.7	-1.25174	0.152332	-8.21723	2.08259e-16	2.54337e-14	ENSG00000035499	55789	DEPDC1B	5	60596912	60700190	-1	protein_coding	DEP domain containing 1B [Source:HGNC Symbol;Acc:HGNC:24902]	nucleic acid binding(PC00171)	NA	NA	ENSG00000035499
ENSG00000035664	ENSG00000035664	106.301	0.72643	0.30464	2.38455	0.0171	0.0670732	ENSG00000035664	23604	DAPK2	15	63907036	64072033	-1	protein_coding	death associated protein kinase 2 [Source:HGNC Symbol;Acc:HGNC:2675]	non-receptor serine/threonine protein kinase(PC00167)	NA	NA	ENSG00000035664
ENSG00000035681	ENSG00000035681	1260.85	0.273056	0.143921	1.89725	0.0577943	0.163519	ENSG00000035681	8439	NSMAF	8	58583504	58659844	-1	protein_coding	neutral sphingomyelinase activation associated factor [Source:HGNC Symbol;Acc:HGNC:8017]	NA	NA	NA	ENSG00000035681
ENSG00000035687	ENSG00000035687	1010.17	0.0155968	0.153771	0.101429	0.91921	0.959083	ENSG00000035687	159	ADSS	1	244408494	244452134	-1	protein_coding	adenylosuccinate synthase [Source:HGNC Symbol;Acc:HGNC:292]	ligase(PC00142)	NA	NA	ENSG00000035687
ENSG00000035720	ENSG00000035720	0	NA	NA	NA	NA	NA	ENSG00000035720	26228	STAP1	4	67558728	67607337	1	protein_coding	signal transducing adaptor family member 1 [Source:HGNC Symbol;Acc:HGNC:24133]	protein kinase receptor(PC00194)	NA	NA	ENSG00000035720
ENSG00000035862	ENSG00000035862	9432.92	-0.550284	0.216511	-2.5416	0.0110347	0.0477498	ENSG00000035862	7077	TIMP2	17	78852977	78925387	-1	protein_coding	TIMP metallopeptidase inhibitor 2 [Source:HGNC Symbol;Acc:HGNC:11821]	protease inhibitor(PC00191)	NA	NA	ENSG00000035862
ENSG00000035928	ENSG00000035928	3288.97	-0.256889	0.171865	-1.49471	0.134989	0.293666	ENSG00000035928	5981	RFC1	4	39287456	39366375	-1	protein_coding	replication factor C subunit 1 [Source:HGNC Symbol;Acc:HGNC:9969]	NA	NA	NA	ENSG00000035928
ENSG00000036054	ENSG00000036054	1561.53	-0.802352	0.121802	-6.58738	4.4767e-11	2.44959e-09	ENSG00000036054	55773	TBC1D23	3	100261000	100325251	1	protein_coding	TBC1 domain family member 23 [Source:HGNC Symbol;Acc:HGNC:25622]	NA	NA	NA	ENSG00000036054
ENSG00000036257	ENSG00000036257	2283.91	0.2456	0.0895753	2.74182	0.00610995	0.0303696	ENSG00000036257	8452	CUL3	2	224470150	224585397	-1	protein_coding	cullin 3 [Source:HGNC Symbol;Acc:HGNC:2553]	NA	NA	NA	ENSG00000036257
ENSG00000036448	ENSG00000036448	71.097	0.124311	0.269804	0.460747	0.64498	0.792471	ENSG00000036448	9172	MYOM2	8	2045040	2165552	1	protein_coding	myomesin 2 [Source:HGNC Symbol;Acc:HGNC:7614]	NA	NA	NA	ENSG00000036448
ENSG00000036473	ENSG00000036473	0.383117	0.656025	3.45657	0.18979	0.849473	NA	ENSG00000036473	5009	OTC	X	38352545	38421450	1	protein_coding	ornithine carbamoyltransferase [Source:HGNC Symbol;Acc:HGNC:8512]	NA	NA	NA	ENSG00000036473
ENSG00000036530	ENSG00000036530	19.9007	0.234353	0.387778	0.604349	0.545612	0.719138	ENSG00000036530	10858	CYP46A1	14	99684304	99727301	1	protein_coding	cytochrome P450 family 46 subfamily A member 1 [Source:HGNC Symbol;Acc:HGNC:2641]	oxygenase(PC00177)	NA	NA	ENSG00000036530
ENSG00000036549	ENSG00000036549	1398.38	-0.011383	0.139794	-0.0814267	0.935103	0.967554	ENSG00000036549	26009	ZZZ3	1	77562416	77683419	-1	protein_coding	zinc finger ZZ-type containing 3 [Source:HGNC Symbol;Acc:HGNC:24523]	zinc finger transcription factor(PC00244)	NA	NA	ENSG00000036549
ENSG00000036565	ENSG00000036565	0	NA	NA	NA	NA	NA	ENSG00000036565	6570	SLC18A1	8	20144855	20183206	-1	protein_coding	solute carrier family 18 member A1 [Source:HGNC Symbol;Acc:HGNC:10934]	NA	NA	NA	ENSG00000036565
ENSG00000036672	ENSG00000036672	22.1021	2.54515	0.449435	5.663	1.48746e-08	4.88352e-07	ENSG00000036672	9099	USP2	11	119355215	119381726	-1	protein_coding	ubiquitin specific peptidase 2 [Source:HGNC Symbol;Acc:HGNC:12618]	cysteine protease(PC00081)	NA	NA	ENSG00000036672
ENSG00000036828	ENSG00000036828	25.7482	0.415357	0.509106	0.815855	0.414583	0.609801	ENSG00000036828	846	CASR	3	122183683	122291629	1	protein_coding	calcium sensing receptor [Source:HGNC Symbol;Acc:HGNC:1514]	G-protein coupled receptor(PC00021)	ionotropic glutamate receptor(PC00134)	NA	ENSG00000036828
ENSG00000037042	ENSG00000037042	129.09	-1.70332	0.245477	-6.93882	3.95399e-12	2.58287e-10	ENSG00000037042	27175	TUBG2	17	42659305	42667006	1	protein_coding	tubulin gamma 2 [Source:HGNC Symbol;Acc:HGNC:12419]	tubulin(PC00228)	NA	NA	ENSG00000037042
ENSG00000037241	ENSG00000037241	634.026	1.06513	0.217216	4.90356	9.41166e-07	1.93751e-05	ENSG00000037241	51121	RPL26L1	5	172958729	172969771	1	protein_coding	ribosomal protein L26 like 1 [Source:HGNC Symbol;Acc:HGNC:17050]	ribosomal protein(PC00202)	NA	NA	ENSG00000037241
ENSG00000037280	ENSG00000037280	333.836	-1.01371	0.305245	-3.32097	0.000897059	0.00663089	ENSG00000037280	2324	FLT4	5	180601506	180649624	-1	protein_coding	fms related tyrosine kinase 4 [Source:HGNC Symbol;Acc:HGNC:3767]	NA	NA	NA	ENSG00000037280
ENSG00000037474	ENSG00000037474	3565.69	0.692788	0.233351	2.96887	0.00298893	0.0172789	ENSG00000037474	54888	NSUN2	5	6599239	6633291	-1	protein_coding	NOP2/Sun RNA methyltransferase family member 2 [Source:HGNC Symbol;Acc:HGNC:25994]	methyltransferase(PC00155)	nucleic acid binding(PC00171)	NA	ENSG00000037474
ENSG00000037637	ENSG00000037637	406.1	0.7971	0.206823	3.85402	0.000116196	0.00124838	ENSG00000037637	54455	FBXO42	1	16246839	16352454	-1	protein_coding	F-box protein 42 [Source:HGNC Symbol;Acc:HGNC:29249]	NA	NA	NA	ENSG00000037637
ENSG00000037749	ENSG00000037749	1106.73	-0.699409	0.370555	-1.88746	0.0590983	0.166157	ENSG00000037749	4238	MFAP3	5	154038906	154220478	1	protein_coding	microfibril associated protein 3 [Source:HGNC Symbol;Acc:HGNC:7034]	NA	NA	NA	ENSG00000037749
ENSG00000037757	ENSG00000037757	416.778	0.318317	0.208147	1.52929	0.126193	0.280475	ENSG00000037757	84245	MRI1	19	13764532	13774282	1	protein_coding	methylthioribose-1-phosphate isomerase 1 [Source:HGNC Symbol;Acc:HGNC:28469]	NA	NA	NA	ENSG00000037757
ENSG00000037897	ENSG00000037897	287.987	0.453349	0.145736	3.11076	0.00186607	0.011838	ENSG00000037897	4234	METTL1	12	57768471	57772793	-1	protein_coding	methyltransferase like 1 [Source:HGNC Symbol;Acc:HGNC:7030]	methyltransferase(PC00155)	NA	NA	ENSG00000037897
ENSG00000037965	ENSG00000037965	206.175	0.212489	0.254505	0.834909	0.403769	0.600146	ENSG00000037965	3224	HOXC8	12	54009106	54012362	1	protein_coding	homeobox C8 [Source:HGNC Symbol;Acc:HGNC:5129]	NA	NA	NA	ENSG00000037965
ENSG00000038002	ENSG00000038002	422.07	0.195479	0.19054	1.02592	0.30493	0.503561	ENSG00000038002	175	AGA	4	177430770	177442503	-1	protein_coding	aspartylglucosaminidase [Source:HGNC Symbol;Acc:HGNC:318]	protease(PC00190)	NA	NA	ENSG00000038002
ENSG00000038210	ENSG00000038210	301.142	-0.27046	0.247991	-1.0906	0.275448	0.472378	ENSG00000038210	55300	PI4K2B	4	25233975	25279092	1	protein_coding	phosphatidylinositol 4-kinase type 2 beta [Source:HGNC Symbol;Acc:HGNC:18215]	kinase(PC00137)	NA	NA	ENSG00000038210
ENSG00000038219	ENSG00000038219	1751.85	0.494519	0.175165	2.82316	0.00475523	0.024974	ENSG00000038219	259282	BOD1L1	4	13568738	13627723	-1	protein_coding	biorientation of chromosomes in cell division 1 like 1 [Source:HGNC Symbol;Acc:HGNC:31792]	NA	NA	NA	ENSG00000038219
ENSG00000038274	ENSG00000038274	1333.81	-0.00937236	0.167147	-0.0560725	0.955284	0.977874	ENSG00000038274	27430	MAT2B	5	163503114	163519336	1	protein_coding	methionine adenosyltransferase 2B [Source:HGNC Symbol;Acc:HGNC:6905]	NA	NA	NA	ENSG00000038274
ENSG00000038295	ENSG00000038295	24.815	-0.532276	0.732517	-0.726639	0.467447	0.654141	ENSG00000038295	7092	TLL1	4	165873258	166103895	1	protein_coding	tolloid like 1 [Source:HGNC Symbol;Acc:HGNC:11843]	NA	NA	NA	ENSG00000038295
ENSG00000038358	ENSG00000038358	1809.61	0.70224	0.26412	2.65879	0.00784229	0.0366321	ENSG00000038358	23644	EDC4	16	67873023	67884503	1	protein_coding	enhancer of mRNA decapping 4 [Source:HGNC Symbol;Acc:HGNC:17157]	major histocompatibility complex antigen(PC00149)	NA	NA	ENSG00000038358
ENSG00000038382	ENSG00000038382	8051.79	0.710843	0.308593	2.3035	0.0212509	0.0790148	ENSG00000038382	7204	TRIO	5	14143702	14532128	1	protein_coding	trio Rho guanine nucleotide exchange factor [Source:HGNC Symbol;Acc:HGNC:12303]	signaling molecule(PC00207)	NA	NA	ENSG00000038382
ENSG00000038427	ENSG00000038427	25.4455	-0.889312	0.448339	-1.98357	0.0473039	0.141202	ENSG00000038427	1462	VCAN	5	83471465	83582303	1	protein_coding	versican [Source:HGNC Symbol;Acc:HGNC:2464]	extracellular matrix glycoprotein(PC00100)	NA	NA	ENSG00000038427
ENSG00000038532	ENSG00000038532	1591.24	-0.0765322	0.099602	-0.768381	0.442261	0.633003	ENSG00000038532	23274	CLEC16A	16	10944488	11182189	1	protein_coding	C-type lectin domain containing 16A [Source:HGNC Symbol;Acc:HGNC:29013]	NA	NA	NA	ENSG00000038532
ENSG00000038945	ENSG00000038945	2.68135	1.00708	0.966675	1.0418	0.297503	0.496166	ENSG00000038945	4481	MSR1	8	16107878	16567490	-1	protein_coding	macrophage scavenger receptor 1 [Source:HGNC Symbol;Acc:HGNC:7376]	oxidase(PC00175)	receptor(PC00197)	serine protease(PC00203)	ENSG00000038945
ENSG00000039068	ENSG00000039068	33.3892	0.219622	0.406094	0.540816	0.588635	0.751094	ENSG00000039068	999	CDH1	16	68737225	68835548	1	protein_coding	cadherin 1 [Source:HGNC Symbol;Acc:HGNC:1748]	NA	NA	NA	ENSG00000039068
ENSG00000039123	ENSG00000039123	2534.17	-0.198003	0.186583	-1.0612	0.288598	0.486906	ENSG00000039123	23517	SKIV2L2	5	55307760	55425581	1	protein_coding	Ski2 like RNA helicase 2 [Source:HGNC Symbol;Acc:HGNC:18734]	NA	NA	NA	ENSG00000039123
ENSG00000039139	ENSG00000039139	96.1993	0.911264	0.274597	3.31855	0.000904845	0.00666895	ENSG00000039139	1767	DNAH5	5	13690331	13944543	-1	protein_coding	dynein axonemal heavy chain 5 [Source:HGNC Symbol;Acc:HGNC:2950]	hydrolase(PC00121)	microtubule binding motor protein(PC00156)	NA	ENSG00000039139
ENSG00000039319	ENSG00000039319	1479.01	0.153337	0.183416	0.836009	0.40315	0.59957	ENSG00000039319	9765	ZFYVE16	5	80408013	80479350	1	protein_coding	zinc finger FYVE-type containing 16 [Source:HGNC Symbol;Acc:HGNC:20756]	NA	NA	NA	ENSG00000039319
ENSG00000039523	ENSG00000039523	1672.79	0.864585	0.093342	9.26255	1.99602e-20	4.13602e-18	ENSG00000039523	79567	RIPOR1	16	67518418	67546788	1	protein_coding	RHO family interacting cell polarization regulator 1 [Source:HGNC Symbol;Acc:HGNC:25836]	NA	NA	NA	ENSG00000039523
ENSG00000039537	ENSG00000039537	0.188709	1.65279	4.32121	0.382482	0.702104	NA	ENSG00000039537	729	C6	5	41142234	41261438	-1	protein_coding	complement C6 [Source:HGNC Symbol;Acc:HGNC:1339]	NA	NA	NA	ENSG00000039537
ENSG00000039560	ENSG00000039560	3784.85	-0.193961	0.257136	-0.754313	0.450661	0.640434	ENSG00000039560	26064	RAI14	5	34656237	34832627	1	protein_coding	retinoic acid induced 14 [Source:HGNC Symbol;Acc:HGNC:14873]	NA	NA	NA	ENSG00000039560
ENSG00000039600	ENSG00000039600	2.13776	1.92015	1.49196	1.287	0.198096	0.380392	ENSG00000039600	11063	SOX30	5	157625679	157671480	-1	protein_coding	SRY-box 30 [Source:HGNC Symbol;Acc:HGNC:30635]	NA	NA	NA	ENSG00000039600
ENSG00000039650	ENSG00000039650	719.369	-0.0979676	0.187067	-0.523705	0.600484	0.760114	ENSG00000039650	11284	PNKP	19	49859882	49878351	-1	protein_coding	polynucleotide kinase 3'-phosphatase [Source:HGNC Symbol;Acc:HGNC:9154]	NA	NA	NA	ENSG00000039650
ENSG00000039987	ENSG00000039987	1.32055	2.95161	1.48695	1.98502	0.0471426	NA	ENSG00000039987	54831	BEST2	19	12751702	12758458	1	protein_coding	bestrophin 2 [Source:HGNC Symbol;Acc:HGNC:17107]	anion channel(PC00049)	NA	NA	ENSG00000039987
ENSG00000040199	ENSG00000040199	1196.67	0.457805	0.15863	2.88599	0.0039019	0.0213547	ENSG00000040199	23035	PHLPP2	16	71637835	71724701	-1	protein_coding	PH domain and leucine rich repeat protein phosphatase 2 [Source:HGNC Symbol;Acc:HGNC:29149]	NA	NA	NA	ENSG00000040199
ENSG00000040275	ENSG00000040275	1321.08	-0.123911	0.237946	-0.520754	0.602538	0.76144	ENSG00000040275	54908	SPDL1	5	169583634	169604778	1	protein_coding	spindle apparatus coiled-coil protein 1 [Source:HGNC Symbol;Acc:HGNC:26010]	NA	NA	NA	ENSG00000040275
ENSG00000040341	ENSG00000040341	1714.81	-0.365399	0.322555	-1.13283	0.257287	0.451118	ENSG00000040341	27067	STAU2	8	73420369	73747708	-1	protein_coding	staufen double-stranded RNA binding protein 2 [Source:HGNC Symbol;Acc:HGNC:11371]	NA	NA	NA	ENSG00000040341
ENSG00000040487	ENSG00000040487	293.127	0.910399	0.232467	3.91624	8.99389e-05	0.00100962	ENSG00000040487	54896	PQLC2	1	19312326	19329300	1	protein_coding	PQ loop repeat containing 2 [Source:HGNC Symbol;Acc:HGNC:26001]	NA	NA	NA	ENSG00000040487
ENSG00000040531	ENSG00000040531	233.932	0.338819	0.179048	1.89234	0.058446	0.164809	ENSG00000040531	1497	CTNS	17	3636468	3661542	1	protein_coding	cystinosin, lysosomal cystine transporter [Source:HGNC Symbol;Acc:HGNC:2518]	amino acid transporter(PC00046)	NA	NA	ENSG00000040531
ENSG00000040608	ENSG00000040608	232.547	-1.23373	0.23447	-5.26178	1.42667e-07	3.66155e-06	ENSG00000040608	65078	RTN4R	22	20241415	20283246	-1	protein_coding	reticulon 4 receptor [Source:HGNC Symbol;Acc:HGNC:18601]	NA	NA	NA	ENSG00000040608
ENSG00000040633	ENSG00000040633	1012.37	-0.013212	0.141831	-0.093153	0.925782	0.96288	ENSG00000040633	79142	PHF23	17	7235028	7239722	-1	protein_coding	PHD finger protein 23 [Source:HGNC Symbol;Acc:HGNC:28428]	NA	NA	NA	ENSG00000040633
ENSG00000040731	ENSG00000040731	67.5896	0.791169	0.398242	1.98665	0.0469608	0.140527	ENSG00000040731	1008	CDH10	5	24487100	24644978	-1	protein_coding	cadherin 10 [Source:HGNC Symbol;Acc:HGNC:1749]	NA	NA	NA	ENSG00000040731
ENSG00000040933	ENSG00000040933	1326.3	0.0152866	0.240898	0.0634567	0.949403	0.974775	ENSG00000040933	3631	INPP4A	2	98444854	98594390	1	protein_coding	inositol polyphosphate-4-phosphatase type I A [Source:HGNC Symbol;Acc:HGNC:6074]	NA	NA	NA	ENSG00000040933
ENSG00000041353	ENSG00000041353	59.1318	-1.27536	0.480956	-2.65172	0.00800824	0.0372148	ENSG00000041353	5874	RAB27B	18	54717860	54895516	1	protein_coding	RAB27B, member RAS oncogene family [Source:HGNC Symbol;Acc:HGNC:9767]	NA	NA	NA	ENSG00000041353
ENSG00000041357	ENSG00000041357	4554.18	0.104126	0.102909	1.01183	0.31162	0.509922	ENSG00000041357	5685	PSMA4	15	78540405	78552419	1	protein_coding	proteasome subunit alpha 4 [Source:HGNC Symbol;Acc:HGNC:9533]	NA	NA	NA	ENSG00000041357
ENSG00000041515	ENSG00000041515	104.935	0.391924	0.282725	1.38624	0.165674	0.337571	ENSG00000041515	23026	MYO16	13	108596152	109208007	1	protein_coding	myosin XVI [Source:HGNC Symbol;Acc:HGNC:29822]	NA	NA	NA	ENSG00000041515
ENSG00000041802	ENSG00000041802	1864.92	0.299695	0.221364	1.35386	0.175782	0.350365	ENSG00000041802	55341	LSG1	3	194640788	194672477	-1	protein_coding	large 60S subunit nuclear export GTPase 1 [Source:HGNC Symbol;Acc:HGNC:25652]	NA	NA	NA	ENSG00000041802
ENSG00000041880	ENSG00000041880	513.207	0.464074	0.269697	1.72072	0.085301	0.213409	ENSG00000041880	10039	PARP3	3	51942345	51948867	1	protein_coding	poly(ADP-ribose) polymerase family member 3 [Source:HGNC Symbol;Acc:HGNC:273]	NA	NA	NA	ENSG00000041880
ENSG00000041982	ENSG00000041982	5465.09	-1.24065	0.327912	-3.78349	0.000154644	0.00157956	ENSG00000041982	3371	TNC	9	115019578	115118257	-1	protein_coding	tenascin C [Source:HGNC Symbol;Acc:HGNC:5318]	NA	NA	NA	ENSG00000041982
ENSG00000041988	ENSG00000041988	177.144	0.690165	0.15958	4.32489	1.52611e-05	0.000220836	ENSG00000041988	90326	THAP3	1	6624866	6635586	1	protein_coding	THAP domain containing 3 [Source:HGNC Symbol;Acc:HGNC:20855]	NA	NA	NA	ENSG00000041988
ENSG00000042062	ENSG00000042062	7.65215	0.758924	0.601812	1.26107	0.207285	0.392257	ENSG00000042062	140876	RIPOR3	20	50586108	50691528	-1	protein_coding	RIPOR family member 3 [Source:HGNC Symbol;Acc:HGNC:16168]	NA	NA	NA	ENSG00000042062
ENSG00000042088	ENSG00000042088	419.552	-0.872895	0.184758	-4.72453	2.30649e-06	4.25917e-05	ENSG00000042088	55775	TDP1	14	89954939	90044768	1	protein_coding	tyrosyl-DNA phosphodiesterase 1 [Source:HGNC Symbol;Acc:HGNC:18884]	phosphodiesterase(PC00185)	NA	NA	ENSG00000042088
ENSG00000042286	ENSG00000042286	1135.13	0.506575	0.248157	2.04135	0.0412156	0.127907	ENSG00000042286	84883	AIFM2	10	70098223	70132934	-1	protein_coding	apoptosis inducing factor, mitochondria associated 2 [Source:HGNC Symbol;Acc:HGNC:21411]	dehydrogenase(PC00092)	oxidase(PC00175)	reductase(PC00198)	ENSG00000042286
ENSG00000042304	ENSG00000042304	2.0489	0.878481	0.991517	0.885997	0.375619	0.573814	ENSG00000042304	56918	C2orf83	2	227610090	227648606	-1	protein_coding	chromosome 2 open reading frame 83 [Source:HGNC Symbol;Acc:HGNC:25344]	NA	NA	NA	ENSG00000042304
ENSG00000042317	ENSG00000042317	227.662	-0.761791	0.297967	-2.55663	0.0105692	0.0462105	ENSG00000042317	55812	SPATA7	14	88384924	88470350	1	protein_coding	spermatogenesis associated 7 [Source:HGNC Symbol;Acc:HGNC:20423]	NA	NA	NA	ENSG00000042317
ENSG00000042429	ENSG00000042429	878.925	0.599314	0.323616	1.85193	0.064036	0.175434	ENSG00000042429	9440	MED17	11	93784227	93814963	1	protein_coding	mediator complex subunit 17 [Source:HGNC Symbol;Acc:HGNC:2375]	NA	NA	NA	ENSG00000042429
ENSG00000042445	ENSG00000042445	1081.79	0.513581	0.0951171	5.39946	6.68427e-08	1.86923e-06	ENSG00000042445	54884	RETSAT	2	85342088	85354620	-1	protein_coding	retinol saturase [Source:HGNC Symbol;Acc:HGNC:25991]	NA	NA	NA	ENSG00000042445
ENSG00000042493	ENSG00000042493	677.168	0.0124628	0.248232	0.0502063	0.959958	0.980396	ENSG00000042493	822	CAPG	2	85394748	85418432	-1	protein_coding	capping actin protein, gelsolin like [Source:HGNC Symbol;Acc:HGNC:1474]	non-motor actin binding protein(PC00165)	NA	NA	ENSG00000042493
ENSG00000042753	ENSG00000042753	2515.13	-0.107691	0.146181	-0.736693	0.461309	0.649435	ENSG00000042753	1175	AP2S1	19	46838136	46850992	-1	protein_coding	adaptor related protein complex 2 sigma 1 subunit [Source:HGNC Symbol;Acc:HGNC:565]	vesicle coat protein(PC00235)	NA	NA	ENSG00000042753
ENSG00000042781	ENSG00000042781	2.03722	0.243577	1.35817	0.179342	0.857669	0.924521	ENSG00000042781	7399	USH2A	1	215622894	216423396	-1	protein_coding	usherin [Source:HGNC Symbol;Acc:HGNC:12601]	extracellular matrix linker protein(PC00101)	protease inhibitor(PC00191)	receptor(PC00197)	ENSG00000042781
ENSG00000042813	ENSG00000042813	0.060796	0	4.32804	0	1	NA	ENSG00000042813	11055	ZPBP	7	49850421	50121329	-1	protein_coding	zona pellucida binding protein [Source:HGNC Symbol;Acc:HGNC:15662]	NA	NA	NA	ENSG00000042813
ENSG00000042832	ENSG00000042832	21.8321	0.895296	0.78182	1.14514	0.252149	0.445079	ENSG00000042832	7038	TG	8	132866958	133134903	1	protein_coding	thyroglobulin [Source:HGNC Symbol;Acc:HGNC:11764]	protease inhibitor(PC00191)	NA	NA	ENSG00000042832
ENSG00000042980	ENSG00000042980	36.8207	2.28964	0.581146	3.93987	8.15262e-05	0.000930046	ENSG00000042980	10863	ADAM28	8	24294040	24359018	1	protein_coding	ADAM metallopeptidase domain 28 [Source:HGNC Symbol;Acc:HGNC:206]	metalloprotease(PC00153)	NA	NA	ENSG00000042980
ENSG00000043039	ENSG00000043039	10.7101	0.182007	0.41803	0.435391	0.663278	0.805237	ENSG00000043039	8538	BARX2	11	129375940	129452279	1	protein_coding	BARX homeobox 2 [Source:HGNC Symbol;Acc:HGNC:956]	DNA binding protein(PC00009)	homeodomain transcription factor(PC00119)	NA	ENSG00000043039
ENSG00000043093	ENSG00000043093	1366.64	-0.682494	0.274935	-2.48239	0.0130506	0.0542719	ENSG00000043093	54165	DCUN1D1	3	182938074	182985953	-1	protein_coding	defective in cullin neddylation 1 domain containing 1 [Source:HGNC Symbol;Acc:HGNC:18184]	NA	NA	NA	ENSG00000043093
ENSG00000043143	ENSG00000043143	887.865	-1.40854	0.303481	-4.64127	3.46271e-06	6.11293e-05	ENSG00000043143	23338	JADE2	5	134524312	134583230	1	protein_coding	jade family PHD finger 2 [Source:HGNC Symbol;Acc:HGNC:22984]	nucleic acid binding(PC00171)	zinc finger transcription factor(PC00244)	NA	ENSG00000043143
ENSG00000043355	ENSG00000043355	4.06998	1.21146	0.814666	1.48706	0.136999	0.296467	ENSG00000043355	7546	ZIC2	13	99981772	99986773	1	protein_coding	Zic family member 2 [Source:HGNC Symbol;Acc:HGNC:12873]	C2H2 zinc finger transcription factor(PC00248)	NA	NA	ENSG00000043355
ENSG00000043462	ENSG00000043462	0.570794	2.42269	2.21235	1.09508	0.273484	NA	ENSG00000043462	3937	LCP2	5	170246237	170298227	-1	protein_coding	lymphocyte cytosolic protein 2 [Source:HGNC Symbol;Acc:HGNC:6529]	signaling molecule(PC00207)	NA	NA	ENSG00000043462
ENSG00000043514	ENSG00000043514	727.844	0.639216	0.317365	2.01413	0.0439957	0.134244	ENSG00000043514	54802	TRIT1	1	39841022	39883511	-1	protein_coding	tRNA isopentenyltransferase 1 [Source:HGNC Symbol;Acc:HGNC:20286]	nucleotidyltransferase(PC00174)	NA	NA	ENSG00000043514
ENSG00000043591	ENSG00000043591	0.355672	0.195738	2.54877	0.0767971	0.938785	NA	ENSG00000043591	153	ADRB1	10	114044056	114046908	1	protein_coding	adrenoceptor beta 1 [Source:HGNC Symbol;Acc:HGNC:285]	G-protein coupled receptor(PC00021)	NA	NA	ENSG00000043591
ENSG00000044012	ENSG00000044012	0.0559401	0	4.32804	0	1	NA	ENSG00000044012	2981	GUCA2B	1	42153421	42155824	1	protein_coding	guanylate cyclase activator 2B [Source:HGNC Symbol;Acc:HGNC:4683]	NA	NA	NA	ENSG00000044012
ENSG00000044090	ENSG00000044090	1369.34	0.718338	0.144193	4.98178	6.30023e-07	1.36128e-05	ENSG00000044090	9820	CUL7	6	43037617	43053945	-1	protein_coding	cullin 7 [Source:HGNC Symbol;Acc:HGNC:21024]	NA	NA	NA	ENSG00000044090
ENSG00000044115	ENSG00000044115	8359.66	-0.787667	0.216323	-3.64117	0.000271407	0.00251786	ENSG00000044115	1495	CTNNA1	5	138610967	138935034	1	protein_coding	catenin alpha 1 [Source:HGNC Symbol;Acc:HGNC:2509]	cell adhesion molecule(PC00069)	non-motor actin binding protein(PC00165)	NA	ENSG00000044115
ENSG00000044446	ENSG00000044446	614.142	0.65905	0.300474	2.19337	0.0282807	0.0973803	ENSG00000044446	5256	PHKA2	X	18892300	18984598	-1	protein_coding	phosphorylase kinase regulatory subunit alpha 2 [Source:HGNC Symbol;Acc:HGNC:8926]	kinase activator(PC00138)	NA	NA	ENSG00000044446
ENSG00000044459	ENSG00000044459	287.819	-0.671582	0.143204	-4.6897	2.73607e-06	4.96896e-05	ENSG00000044459	54875	CNTLN	9	17134982	17503923	1	protein_coding	centlein [Source:HGNC Symbol;Acc:HGNC:23432]	NA	NA	NA	ENSG00000044459
ENSG00000044524	ENSG00000044524	3.82357	-4.77554	1.14895	-4.15644	3.23246e-05	0.000419059	ENSG00000044524	2042	EPHA3	3	89107524	89482134	1	protein_coding	EPH receptor A3 [Source:HGNC Symbol;Acc:HGNC:3387]	NA	NA	NA	ENSG00000044524
ENSG00000044574	ENSG00000044574	22592	0.409991	0.174076	2.35525	0.0185102	0.0711274	ENSG00000044574	3309	HSPA5	9	125234853	125241330	-1	protein_coding	heat shock protein family A (Hsp70) member 5 [Source:HGNC Symbol;Acc:HGNC:5238]	NA	NA	NA	ENSG00000044574
ENSG00000046604	ENSG00000046604	2547.13	-1.80689	0.204158	-8.85046	8.71563e-19	1.38573e-16	ENSG00000046604	1829	DSG2	18	31498043	31549008	1	protein_coding	desmoglein 2 [Source:HGNC Symbol;Acc:HGNC:3049]	cadherin(PC00057)	cell junction protein(PC00070)	NA	ENSG00000046604
ENSG00000046647	ENSG00000046647	98.4804	0.262199	0.191339	1.37034	0.170582	0.343747	ENSG00000046647	54960	GEMIN8	X	14008279	14029893	-1	protein_coding	gem nuclear organelle associated protein 8 [Source:HGNC Symbol;Acc:HGNC:26044]	NA	NA	NA	ENSG00000046647
ENSG00000046651	ENSG00000046651	454.491	0.597611	0.271246	2.20321	0.0275798	0.0957323	ENSG00000046651	8481	OFD1	X	13734745	13769353	1	protein_coding	OFD1, centriole and centriolar satellite protein [Source:HGNC Symbol;Acc:HGNC:2567]	NA	NA	NA	ENSG00000046651
ENSG00000046653	ENSG00000046653	35.3897	-1.06652	0.361593	-2.94949	0.00318294	0.0181759	ENSG00000046653	2824	GPM6B	X	13771031	13938638	-1	protein_coding	glycoprotein M6B [Source:HGNC Symbol;Acc:HGNC:4461]	myelin protein(PC00161)	NA	NA	ENSG00000046653
ENSG00000046774	ENSG00000046774	4.00416	4.30405	1.37524	3.12968	0.00175	0.0112484	ENSG00000046774	51438	MAGEC2	X	142202345	142205290	-1	protein_coding	MAGE family member C2 [Source:HGNC Symbol;Acc:HGNC:13574]	cell adhesion molecule(PC00069)	NA	NA	ENSG00000046774
ENSG00000046889	ENSG00000046889	38.1838	0.460046	0.600698	0.765853	0.443764	0.634307	ENSG00000046889	80243	PREX2	8	67952118	68237030	1	protein_coding	phosphatidylinositol-3,4,5-trisphosphate dependent Rac exchange factor 2 [Source:HGNC Symbol;Acc:HGNC:22950]	guanyl-nucleotide exchange factor(PC00113)	NA	NA	ENSG00000046889
ENSG00000047056	ENSG00000047056	149.779	0.299133	0.174516	1.71407	0.0865161	0.215508	ENSG00000047056	22884	WDR37	10	1049538	1132297	1	protein_coding	WD repeat domain 37 [Source:HGNC Symbol;Acc:HGNC:31406]	NA	NA	NA	ENSG00000047056
ENSG00000047188	ENSG00000047188	1005.73	0.00480046	0.170714	0.0281198	0.977567	0.989703	ENSG00000047188	64848	YTHDC2	5	113513683	113595285	1	protein_coding	YTH domain containing 2 [Source:HGNC Symbol;Acc:HGNC:24721]	RNA helicase(PC00032)	NA	NA	ENSG00000047188
ENSG00000047230	ENSG00000047230	208.177	0.930632	0.29565	3.14775	0.00164532	0.0107283	ENSG00000047230	56474	CTPS2	X	16588003	16712936	-1	protein_coding	CTP synthase 2 [Source:HGNC Symbol;Acc:HGNC:2520]	cysteine protease(PC00081)	ligase(PC00142)	NA	ENSG00000047230
ENSG00000047249	ENSG00000047249	785.749	0.289844	0.182418	1.58891	0.112082	0.258336	ENSG00000047249	51606	ATP6V1H	8	53715557	53843558	-1	protein_coding	ATPase H+ transporting V1 subunit H [Source:HGNC Symbol;Acc:HGNC:18303]	ATP synthase(PC00002)	hydrolase(PC00121)	NA	ENSG00000047249
ENSG00000047315	ENSG00000047315	5268.74	0.277859	0.153794	1.80669	0.0708099	0.187974	ENSG00000047315	5431	POLR2B	4	56977722	57031168	1	protein_coding	RNA polymerase II subunit B [Source:HGNC Symbol;Acc:HGNC:9188]	DNA-directed RNA polymerase(PC00019)	nucleotidyltransferase(PC00174)	NA	ENSG00000047315
ENSG00000047346	ENSG00000047346	286.322	-0.082997	0.22292	-0.372317	0.709657	0.835629	ENSG00000047346	56204	FAM214A	15	52581317	52709817	-1	protein_coding	family with sequence similarity 214 member A [Source:HGNC Symbol;Acc:HGNC:25609]	NA	NA	NA	ENSG00000047346
ENSG00000047365	ENSG00000047365	1285.09	-0.0624161	0.274111	-0.227703	0.819877	0.904562	ENSG00000047365	116984	ARAP2	4	35948221	36244509	-1	protein_coding	ArfGAP with RhoGAP domain, ankyrin repeat and PH domain 2 [Source:HGNC Symbol;Acc:HGNC:16924]	NA	NA	NA	ENSG00000047365
ENSG00000047410	ENSG00000047410	6487.21	0.394597	0.287265	1.37363	0.169556	0.342526	ENSG00000047410	7175	TPR	1	186311652	186375693	-1	protein_coding	translocated promoter region, nuclear basket protein [Source:HGNC Symbol;Acc:HGNC:12017]	NA	NA	NA	ENSG00000047410
ENSG00000047457	ENSG00000047457	1.44756	2.45858	1.54205	1.59436	0.110855	NA	ENSG00000047457	1356	CP	3	149162410	149222055	-1	protein_coding	ceruloplasmin [Source:HGNC Symbol;Acc:HGNC:2295]	oxidase(PC00175)	NA	NA	ENSG00000047457
ENSG00000047578	ENSG00000047578	763.06	0.0367603	0.106982	0.343611	0.731139	0.849512	ENSG00000047578	23247	KIAA0556	16	27550133	27780369	1	protein_coding	KIAA0556 [Source:HGNC Symbol;Acc:HGNC:29068]	NA	NA	NA	ENSG00000047578
ENSG00000047579	ENSG00000047579	242.588	0.00924685	0.128861	0.0717584	0.942794	0.97158	ENSG00000047579	84062	DTNBP1	6	15522801	15663058	-1	protein_coding	dystrobrevin binding protein 1 [Source:HGNC Symbol;Acc:HGNC:17328]	NA	NA	NA	ENSG00000047579
ENSG00000047597	ENSG00000047597	38.4453	-0.277325	0.292675	-0.947551	0.343358	0.541819	ENSG00000047597	7504	XK	X	37685759	37732130	1	protein_coding	X-linked Kx blood group [Source:HGNC Symbol;Acc:HGNC:12811]	NA	NA	NA	ENSG00000047597
ENSG00000047617	ENSG00000047617	388.686	0.328842	0.3352	0.98103	0.326578	0.525251	ENSG00000047617	57101	ANO2	12	5531869	5946232	-1	protein_coding	anoctamin 2 [Source:HGNC Symbol;Acc:HGNC:1183]	NA	NA	NA	ENSG00000047617
ENSG00000047621	ENSG00000047621	623.319	-0.325276	0.195055	-1.66761	0.095393	0.230637	ENSG00000047621	57102	C12orf4	12	4487728	4538508	-1	protein_coding	chromosome 12 open reading frame 4 [Source:HGNC Symbol;Acc:HGNC:1184]	NA	NA	NA	ENSG00000047621
ENSG00000047634	ENSG00000047634	470.472	0.41261	0.123766	3.33379	0.000856724	0.00637374	ENSG00000047634	6322	SCML1	X	17737449	17754988	1	protein_coding	sex comb on midleg like 1 (Drosophila) [Source:HGNC Symbol;Acc:HGNC:10580]	chromatin/chromatin-binding protein(PC00077)	transcription factor(PC00218)	NA	ENSG00000047634
ENSG00000047644	ENSG00000047644	131.689	-0.520218	0.251699	-2.06683	0.0387504	0.122421	ENSG00000047644	55841	WWC3	X	10015562	10144478	1	protein_coding	WWC family member 3 [Source:HGNC Symbol;Acc:HGNC:29237]	NA	NA	NA	ENSG00000047644
ENSG00000047648	ENSG00000047648	37.8401	1.22636	0.302946	4.04812	5.16309e-05	0.000632862	ENSG00000047648	395	ARHGAP6	X	11137543	11665701	-1	protein_coding	Rho GTPase activating protein 6 [Source:HGNC Symbol;Acc:HGNC:676]	cytoskeletal protein(PC00085)	NA	NA	ENSG00000047648
ENSG00000047662	ENSG00000047662	7.7047	0.242926	0.626579	0.387702	0.698236	0.828082	ENSG00000047662	27146	FAM184B	4	17629306	17781512	-1	protein_coding	family with sequence similarity 184 member B [Source:HGNC Symbol;Acc:HGNC:29235]	NA	NA	NA	ENSG00000047662
ENSG00000047849	ENSG00000047849	9544.44	-0.342143	0.171147	-1.99912	0.0455949	0.137448	ENSG00000047849	4134	MAP4	3	47850690	48089272	-1	protein_coding	microtubule associated protein 4 [Source:HGNC Symbol;Acc:HGNC:6862]	NA	NA	NA	ENSG00000047849
ENSG00000047932	ENSG00000047932	1413.76	0.00707052	0.207149	0.0341326	0.972771	0.987143	ENSG00000047932	57120	GOPC	6	117560269	117602542	-1	protein_coding	golgi associated PDZ and coiled-coil motif containing [Source:HGNC Symbol;Acc:HGNC:17643]	NA	NA	NA	ENSG00000047932
ENSG00000047936	ENSG00000047936	308.555	2.59078	0.263341	9.83811	7.71433e-23	2.07466e-20	ENSG00000047936	6098	ROS1	6	117288300	117425855	-1	protein_coding	ROS proto-oncogene 1, receptor tyrosine kinase [Source:HGNC Symbol;Acc:HGNC:10261]	NA	NA	NA	ENSG00000047936
ENSG00000048028	ENSG00000048028	1932.28	-0.386696	0.223058	-1.73361	0.0829879	0.209291	ENSG00000048028	57646	USP28	11	113797874	113875570	-1	protein_coding	ubiquitin specific peptidase 28 [Source:HGNC Symbol;Acc:HGNC:12625]	cysteine protease(PC00081)	NA	NA	ENSG00000048028
ENSG00000048052	ENSG00000048052	1109.84	-0.440461	0.286879	-1.53536	0.124696	0.277982	ENSG00000048052	9734	HDAC9	7	18086949	19002416	1	protein_coding	histone deacetylase 9 [Source:HGNC Symbol;Acc:HGNC:14065]	NA	NA	NA	ENSG00000048052
ENSG00000048140	ENSG00000048140	2394.67	-0.106067	0.21895	-0.484432	0.628079	0.78023	ENSG00000048140	26262	TSPAN17	5	176647387	176659054	1	protein_coding	tetraspanin 17 [Source:HGNC Symbol;Acc:HGNC:13594]	NA	NA	NA	ENSG00000048140
ENSG00000048162	ENSG00000048162	828.054	1.40772	0.334952	4.20274	2.63703e-05	0.000351976	ENSG00000048162	51491	NOP16	5	176383938	176388975	-1	protein_coding	NOP16 nucleolar protein [Source:HGNC Symbol;Acc:HGNC:26934]	NA	NA	NA	ENSG00000048162
ENSG00000048342	ENSG00000048342	398.291	0.544277	0.246395	2.20896	0.0271774	0.0947126	ENSG00000048342	57545	CC2D2A	4	15469865	15601557	1	protein_coding	coiled-coil and C2 domain containing 2A [Source:HGNC Symbol;Acc:HGNC:29253]	NA	NA	NA	ENSG00000048342
ENSG00000048392	ENSG00000048392	7505.93	0.75199	0.445048	1.68968	0.0910888	0.223143	ENSG00000048392	50484	RRM2B	8	102204502	102239118	-1	protein_coding	ribonucleotide reductase regulatory TP53 inducible subunit M2B [Source:HGNC Symbol;Acc:HGNC:17296]	reductase(PC00198)	NA	NA	ENSG00000048392
ENSG00000048405	ENSG00000048405	391.865	0.339211	0.140955	2.40653	0.0161051	0.0638646	ENSG00000048405	168850	ZNF800	7	127346790	127431924	-1	protein_coding	zinc finger protein 800 [Source:HGNC Symbol;Acc:HGNC:27267]	NA	NA	NA	ENSG00000048405
ENSG00000048462	ENSG00000048462	0.391769	-0.467712	2.94168	-0.158995	0.873673	NA	ENSG00000048462	608	TNFRSF17	16	11965107	11968068	1	protein_coding	TNF receptor superfamily member 17 [Source:HGNC Symbol;Acc:HGNC:11913]	tumor necrosis factor receptor(PC00230)	NA	NA	ENSG00000048462
ENSG00000048471	ENSG00000048471	342.842	-0.464139	0.177364	-2.61687	0.00887408	0.0403049	ENSG00000048471	92017	SNX29	16	11976737	12574289	1	protein_coding	sorting nexin 29 [Source:HGNC Symbol;Acc:HGNC:30542]	NA	NA	NA	ENSG00000048471
ENSG00000048540	ENSG00000048540	9.41162	-2.83243	0.621128	-4.56013	5.11216e-06	8.60996e-05	ENSG00000048540	55885	LMO3	12	16548373	16610594	-1	protein_coding	LIM domain only 3 [Source:HGNC Symbol;Acc:HGNC:6643]	NA	NA	NA	ENSG00000048540
ENSG00000048544	ENSG00000048544	1516.1	0.529811	0.153387	3.45407	0.000552199	0.00449874	ENSG00000048544	55173	MRPS10	6	42206801	42217865	-1	protein_coding	mitochondrial ribosomal protein S10 [Source:HGNC Symbol;Acc:HGNC:14502]	NA	NA	NA	ENSG00000048544
ENSG00000048545	ENSG00000048545	0	NA	NA	NA	NA	NA	ENSG00000048545	2978	GUCA1A	6	42155406	42180056	1	protein_coding	guanylate cyclase activator 1A [Source:HGNC Symbol;Acc:HGNC:4678]	NA	NA	NA	ENSG00000048545
ENSG00000048649	ENSG00000048649	2157.44	-0.205823	0.181194	-1.13592	0.255988	0.449683	ENSG00000048649	51773	RSF1	11	77659996	77821017	-1	protein_coding	remodeling and spacing factor 1 [Source:HGNC Symbol;Acc:HGNC:18118]	acetyltransferase(PC00038)	chromatin/chromatin-binding protein(PC00077)	zinc finger transcription factor(PC00244)	ENSG00000048649
ENSG00000048707	ENSG00000048707	1623.03	0.417366	0.212004	1.96867	0.0489911	0.144887	ENSG00000048707	55187	VPS13D	1	12230067	12512047	1	protein_coding	vacuolar protein sorting 13 homolog D [Source:HGNC Symbol;Acc:HGNC:23595]	NA	NA	NA	ENSG00000048707
ENSG00000048740	ENSG00000048740	96.5244	-0.52453	0.253733	-2.06726	0.0387101	0.122315	ENSG00000048740	10659	CELF2	10	10798397	11336675	1	protein_coding	CUGBP Elav-like family member 2 [Source:HGNC Symbol;Acc:HGNC:2550]	NA	NA	NA	ENSG00000048740
ENSG00000048828	ENSG00000048828	4083.17	-0.250739	0.244741	-1.0245	0.305597	0.504081	ENSG00000048828	23196	FAM120A	9	93451722	93566107	1	protein_coding	family with sequence similarity 120A [Source:HGNC Symbol;Acc:HGNC:13247]	NA	NA	NA	ENSG00000048828
ENSG00000048991	ENSG00000048991	1346.4	-0.155792	0.159874	-0.974463	0.329827	0.528827	ENSG00000048991	23518	R3HDM1	2	135531455	135725270	1	protein_coding	R3H domain containing 1 [Source:HGNC Symbol;Acc:HGNC:9757]	NA	NA	NA	ENSG00000048991
ENSG00000049089	ENSG00000049089	963.233	0.697524	0.336018	2.07586	0.0379073	0.12054	ENSG00000049089	1298	COL9A2	1	40300487	40317816	-1	protein_coding	collagen type IX alpha 2 chain [Source:HGNC Symbol;Acc:HGNC:2218]	NA	NA	NA	ENSG00000049089
ENSG00000049130	ENSG00000049130	759.892	0.73913	0.40943	1.80526	0.0710333	0.188428	ENSG00000049130	4254	KITLG	12	88492793	88580851	-1	protein_coding	KIT ligand [Source:HGNC Symbol;Acc:HGNC:6343]	NA	NA	NA	ENSG00000049130
ENSG00000049167	ENSG00000049167	383.575	-0.374689	0.200206	-1.87152	0.0612726	0.170248	ENSG00000049167	1161	ERCC8	5	60873831	60945073	-1	protein_coding	ERCC excision repair 8, CSA ubiquitin ligase complex subunit [Source:HGNC Symbol;Acc:HGNC:3439]	NA	NA	NA	ENSG00000049167
ENSG00000049192	ENSG00000049192	1198.25	-1.00297	0.262935	-3.8145	0.000136459	0.00142313	ENSG00000049192	11174	ADAMTS6	5	65148736	65481920	-1	protein_coding	ADAM metallopeptidase with thrombospondin type 1 motif 6 [Source:HGNC Symbol;Acc:HGNC:222]	extracellular matrix glycoprotein(PC00100)	metalloprotease(PC00153)	serine protease inhibitor(PC00204)	ENSG00000049192
ENSG00000049239	ENSG00000049239	969.1	-0.494653	0.252915	-1.95581	0.0504876	0.148135	ENSG00000049239	9563	H6PD	1	9234775	9271337	1	protein_coding	hexose-6-phosphate dehydrogenase/glucose 1-dehydrogenase [Source:HGNC Symbol;Acc:HGNC:4795]	dehydrogenase(PC00092)	NA	NA	ENSG00000049239
ENSG00000049245	ENSG00000049245	1411.8	-0.179705	0.194523	-0.923824	0.355578	0.553647	ENSG00000049245	9341	VAMP3	1	7771269	7781432	1	protein_coding	vesicle associated membrane protein 3 [Source:HGNC Symbol;Acc:HGNC:12644]	NA	NA	NA	ENSG00000049245
ENSG00000049246	ENSG00000049246	1907.09	-0.577235	0.18417	-3.13426	0.0017229	0.0111251	ENSG00000049246	8863	PER3	1	7784320	7845177	1	protein_coding	period circadian clock 3 [Source:HGNC Symbol;Acc:HGNC:8847]	transcription cofactor(PC00217)	NA	NA	ENSG00000049246
ENSG00000049247	ENSG00000049247	0.143704	1.75554	4.31728	0.406632	0.684278	NA	ENSG00000049247	10911	UTS2	1	7843083	7853512	-1	protein_coding	urotensin 2 [Source:HGNC Symbol;Acc:HGNC:12636]	NA	NA	NA	ENSG00000049247
ENSG00000049249	ENSG00000049249	652.034	2.17332	0.283939	7.65417	1.94567e-14	1.77569e-12	ENSG00000049249	3604	TNFRSF9	1	7915894	7943165	-1	protein_coding	TNF receptor superfamily member 9 [Source:HGNC Symbol;Acc:HGNC:11924]	NA	NA	NA	ENSG00000049249
ENSG00000049283	ENSG00000049283	42.4748	0.281792	0.494572	0.569768	0.568835	0.736462	ENSG00000049283	55040	EPN3	17	50532543	50543750	1	protein_coding	epsin 3 [Source:HGNC Symbol;Acc:HGNC:18235]	NA	NA	NA	ENSG00000049283
ENSG00000049323	ENSG00000049323	2092.19	-0.514293	0.302653	-1.69928	0.0892665	0.220183	ENSG00000049323	4052	LTBP1	2	32946972	33399509	1	protein_coding	latent transforming growth factor beta binding protein 1 [Source:HGNC Symbol;Acc:HGNC:6714]	annexin(PC00050)	calmodulin(PC00061)	cell adhesion molecule(PC00069)	ENSG00000049323
ENSG00000049449	ENSG00000049449	11189.6	-0.0465412	0.118198	-0.393756	0.693761	0.824812	ENSG00000049449	5954	RCN1	11	31812391	32105755	1	protein_coding	reticulocalbin 1 [Source:HGNC Symbol;Acc:HGNC:9934]	calmodulin(PC00061)	NA	NA	ENSG00000049449
ENSG00000049540	ENSG00000049540	3.47567	-0.0780625	1.14494	-0.0681803	0.945642	0.973127	ENSG00000049540	2006	ELN	7	74027789	74069907	1	protein_coding	elastin [Source:HGNC Symbol;Acc:HGNC:3327]	NA	NA	NA	ENSG00000049540
ENSG00000049541	ENSG00000049541	1228.14	-0.417318	0.214342	-1.94697	0.0515378	0.150361	ENSG00000049541	5982	RFC2	7	74231499	74254458	-1	protein_coding	replication factor C subunit 2 [Source:HGNC Symbol;Acc:HGNC:9970]	DNA-directed DNA polymerase(PC00018)	nucleotidyltransferase(PC00174)	NA	ENSG00000049541
ENSG00000049618	ENSG00000049618	1902.52	-0.23677	0.186011	-1.27288	0.20306	0.386868	ENSG00000049618	57492	ARID1B	6	156777374	157210779	1	protein_coding	AT-rich interaction domain 1B [Source:HGNC Symbol;Acc:HGNC:18040]	NA	NA	NA	ENSG00000049618
ENSG00000049656	ENSG00000049656	8970.98	-0.74958	0.300857	-2.49148	0.0127212	0.0532848	ENSG00000049656	81037	CLPTM1L	5	1317744	1345099	-1	protein_coding	CLPTM1 like [Source:HGNC Symbol;Acc:HGNC:24308]	lyase(PC00144)	NA	NA	ENSG00000049656
ENSG00000049759	ENSG00000049759	2126.27	0.361263	0.166151	2.17431	0.0296818	0.100814	ENSG00000049759	23327	NEDD4L	18	58044367	58401540	1	protein_coding	neural precursor cell expressed, developmentally down-regulated 4-like, E3 ubiquitin protein ligase [Source:HGNC Symbol;Acc:HGNC:7728]	ubiquitin-protein ligase(PC00234)	NA	NA	ENSG00000049759
ENSG00000049768	ENSG00000049768	13.1653	-0.851315	0.523356	-1.62665	0.103812	0.245213	ENSG00000049768	50943	FOXP3	X	49250436	49264826	-1	protein_coding	forkhead box P3 [Source:HGNC Symbol;Acc:HGNC:6106]	NA	NA	NA	ENSG00000049768
ENSG00000049769	ENSG00000049769	76.3687	-0.413652	0.411674	-1.0048	0.314992	0.51341	ENSG00000049769	89801	PPP1R3F	X	49269843	49301461	1	protein_coding	protein phosphatase 1 regulatory subunit 3F [Source:HGNC Symbol;Acc:HGNC:14944]	phosphatase modulator(PC00184)	NA	NA	ENSG00000049769
ENSG00000049860	ENSG00000049860	1383.87	0.402084	0.299618	1.34199	0.179599	0.355403	ENSG00000049860	3074	HEXB	5	74640023	74722647	1	protein_coding	hexosaminidase subunit beta [Source:HGNC Symbol;Acc:HGNC:4879]	glycosidase(PC00110)	NA	NA	ENSG00000049860
ENSG00000049883	ENSG00000049883	380.037	-0.0806868	0.135702	-0.594588	0.552119	0.724316	ENSG00000049883	79810	PTCD2	5	72320367	72368395	1	protein_coding	pentatricopeptide repeat domain 2 [Source:HGNC Symbol;Acc:HGNC:25734]	NA	NA	NA	ENSG00000049883
ENSG00000050030	ENSG00000050030	39.6932	0.551945	0.762094	0.724249	0.468913	0.655503	ENSG00000050030	340533	NEXMIF	X	74732849	74925485	-1	protein_coding	neurite extension and migration factor [Source:HGNC Symbol;Acc:HGNC:29433]	NA	NA	NA	ENSG00000050030
ENSG00000050130	ENSG00000050130	2103.69	0.0351137	0.0640519	0.548207	0.58355	0.746906	ENSG00000050130	51528	JKAMP	14	59484443	59505410	1	protein_coding	JNK1/MAPK8-associated membrane protein [Source:HGNC Symbol;Acc:HGNC:20184]	NA	NA	NA	ENSG00000050130
ENSG00000050165	ENSG00000050165	6005.88	-0.0839492	0.182894	-0.459004	0.646231	0.79319	ENSG00000050165	27122	DKK3	11	11963106	12009769	-1	protein_coding	dickkopf WNT signaling pathway inhibitor 3 [Source:HGNC Symbol;Acc:HGNC:2893]	NA	NA	NA	ENSG00000050165
ENSG00000050327	ENSG00000050327	18.0812	-0.317407	0.780278	-0.406787	0.684164	0.818846	ENSG00000050327	7984	ARHGEF5	7	144355288	144380632	1	protein_coding	Rho guanine nucleotide exchange factor 5 [Source:HGNC Symbol;Acc:HGNC:13209]	NA	NA	NA	ENSG00000050327
ENSG00000050344	ENSG00000050344	3.31867	1.8181	1.02013	1.78222	0.0747131	0.195078	ENSG00000050344	9603	NFE2L3	7	26152240	26187125	1	protein_coding	nuclear factor, erythroid 2 like 3 [Source:HGNC Symbol;Acc:HGNC:7783]	hydrolase(PC00121)	non-motor actin binding protein(PC00165)	nucleic acid binding(PC00171)	ENSG00000050344
ENSG00000050393	ENSG00000050393	781.307	0.182934	0.164392	1.1128	0.265796	0.460985	ENSG00000050393	63933	MCUR1	6	13786557	13814568	-1	protein_coding	mitochondrial calcium uniporter regulator 1 [Source:HGNC Symbol;Acc:HGNC:21097]	NA	NA	NA	ENSG00000050393
ENSG00000050405	ENSG00000050405	4461.28	1.07218	0.231081	4.63985	3.4866e-06	6.14652e-05	ENSG00000050405	51474	LIMA1	12	50175788	50283546	-1	protein_coding	LIM domain and actin binding 1 [Source:HGNC Symbol;Acc:HGNC:24636]	actin family cytoskeletal protein(PC00041)	nuclease(PC00170)	transcription factor(PC00218)	ENSG00000050405
ENSG00000050426	ENSG00000050426	929.432	0.373889	0.148397	2.51951	0.0117517	0.0501563	ENSG00000050426	25875	LETMD1	12	51047962	51060424	1	protein_coding	LETM1 domain containing 1 [Source:HGNC Symbol;Acc:HGNC:24241]	NA	NA	NA	ENSG00000050426
ENSG00000050438	ENSG00000050438	516.919	-0.188097	0.367115	-0.512366	0.608395	0.765474	ENSG00000050438	9498	SLC4A8	12	51391317	51515763	1	protein_coding	solute carrier family 4 member 8 [Source:HGNC Symbol;Acc:HGNC:11034]	cation transporter(PC00068)	NA	NA	ENSG00000050438
ENSG00000050555	ENSG00000050555	769.914	1.26304	0.43266	2.91925	0.00350874	0.0196894	ENSG00000050555	10319	LAMC3	9	131009082	131094473	1	protein_coding	laminin subunit gamma 3 [Source:HGNC Symbol;Acc:HGNC:6494]	extracellular matrix linker protein(PC00101)	protease inhibitor(PC00191)	receptor(PC00197)	ENSG00000050555
ENSG00000050628	ENSG00000050628	16.3675	1.98813	0.618307	3.21544	0.00130244	0.00889643	ENSG00000050628	5733	PTGER3	1	70852353	71047808	-1	protein_coding	prostaglandin E receptor 3 [Source:HGNC Symbol;Acc:HGNC:9595]	G-protein coupled receptor(PC00021)	NA	NA	ENSG00000050628
ENSG00000050730	ENSG00000050730	82.1661	1.35728	0.422361	3.21356	0.001311	0.00895246	ENSG00000050730	79931	TNIP3	4	121131408	121227466	-1	protein_coding	TNFAIP3 interacting protein 3 [Source:HGNC Symbol;Acc:HGNC:19315]	NA	NA	NA	ENSG00000050730
ENSG00000050748	ENSG00000050748	1186.72	-0.198932	0.203988	-0.975215	0.329454	0.528612	ENSG00000050748	5601	MAPK9	5	180233143	180292099	-1	protein_coding	mitogen-activated protein kinase 9 [Source:HGNC Symbol;Acc:HGNC:6886]	non-receptor serine/threonine protein kinase(PC00167)	NA	NA	ENSG00000050748
ENSG00000050767	ENSG00000050767	0.359926	1.73884	2.95436	0.588566	0.556153	NA	ENSG00000050767	91522	COL23A1	5	178237618	178590555	-1	protein_coding	collagen type XXIII alpha 1 chain [Source:HGNC Symbol;Acc:HGNC:22990]	NA	NA	NA	ENSG00000050767
ENSG00000050820	ENSG00000050820	1596.38	0.614858	0.131909	4.66122	3.14335e-06	5.61582e-05	ENSG00000050820	9564	BCAR1	16	75228187	75268053	-1	protein_coding	BCAR1, Cas family scaffolding protein [Source:HGNC Symbol;Acc:HGNC:971]	NA	NA	NA	ENSG00000050820
ENSG00000051009	ENSG00000051009	679.725	0.744374	0.242983	3.06348	0.00218779	0.0134404	ENSG00000051009	84067	FAM160A2	11	6211335	6234711	-1	protein_coding	family with sequence similarity 160 member A2 [Source:HGNC Symbol;Acc:HGNC:25378]	NA	NA	NA	ENSG00000051009
ENSG00000051108	ENSG00000051108	1601.77	0.447341	0.156259	2.86282	0.0041989	0.0226715	ENSG00000051108	9709	HERPUD1	16	56932048	56944863	1	protein_coding	homocysteine inducible ER protein with ubiquitin like domain 1 [Source:HGNC Symbol;Acc:HGNC:13744]	NA	NA	NA	ENSG00000051108
ENSG00000051128	ENSG00000051128	673.416	0.160585	0.203157	0.79045	0.429265	0.622134	ENSG00000051128	9454	HOMER3	19	18929201	18941261	-1	protein_coding	homer scaffolding protein 3 [Source:HGNC Symbol;Acc:HGNC:17514]	NA	NA	NA	ENSG00000051128
ENSG00000051180	ENSG00000051180	288.446	-1.0401	0.342757	-3.0345	0.00240933	0.0145191	ENSG00000051180	5888	RAD51	15	40694774	40732339	1	protein_coding	RAD51 recombinase [Source:HGNC Symbol;Acc:HGNC:9817]	NA	NA	NA	ENSG00000051180
ENSG00000051341	ENSG00000051341	1439.03	0.148993	0.533235	0.279413	0.779928	0.880912	ENSG00000051341	10721	POLQ	3	121431427	121546641	-1	protein_coding	DNA polymerase theta [Source:HGNC Symbol;Acc:HGNC:9186]	DNA-directed DNA polymerase(PC00018)	exodeoxyribonuclease(PC00098)	hydrolase(PC00121)	ENSG00000051341
ENSG00000051382	ENSG00000051382	603.222	-0.709582	0.173367	-4.09294	4.2593e-05	0.00053422	ENSG00000051382	5291	PIK3CB	3	138652699	138834938	-1	protein_coding	phosphatidylinositol-4,5-bisphosphate 3-kinase catalytic subunit beta [Source:HGNC Symbol;Acc:HGNC:8976]	kinase(PC00137)	NA	NA	ENSG00000051382
ENSG00000051523	ENSG00000051523	6.37245	1.97384	0.959876	2.05635	0.0397488	0.124688	ENSG00000051523	1535	CYBA	16	88643283	88651152	-1	protein_coding	cytochrome b-245 alpha chain [Source:HGNC Symbol;Acc:HGNC:2577]	NA	NA	NA	ENSG00000051523
ENSG00000051596	ENSG00000051596	648.069	0.162364	0.150831	1.07646	0.28172	0.479461	ENSG00000051596	84321	THOC3	5	175917873	176034680	-1	protein_coding	THO complex 3 [Source:HGNC Symbol;Acc:HGNC:19072]	RNA binding protein(PC00031)	NA	NA	ENSG00000051596
ENSG00000051620	ENSG00000051620	1464.96	0.50395	0.135325	3.724	0.000196089	0.00192366	ENSG00000051620	23593	HEBP2	6	138403531	138422197	1	protein_coding	heme binding protein 2 [Source:HGNC Symbol;Acc:HGNC:15716]	NA	NA	NA	ENSG00000051620
ENSG00000051825	ENSG00000051825	1420.4	-0.267205	0.130501	-2.04753	0.0406062	0.126641	ENSG00000051825	10198	MPHOSPH9	12	123152320	123244014	-1	protein_coding	M-phase phosphoprotein 9 [Source:HGNC Symbol;Acc:HGNC:7215]	NA	NA	NA	ENSG00000051825
ENSG00000052126	ENSG00000052126	1558.8	-0.370465	0.161111	-2.29945	0.0214796	0.0796195	ENSG00000052126	54477	PLEKHA5	12	19129752	19376400	1	protein_coding	pleckstrin homology domain containing A5 [Source:HGNC Symbol;Acc:HGNC:30036]	NA	NA	NA	ENSG00000052126
ENSG00000052344	ENSG00000052344	13.5989	0.896406	0.565134	1.58618	0.112698	0.259235	ENSG00000052344	5652	PRSS8	16	31131433	31135762	-1	protein_coding	protease, serine 8 [Source:HGNC Symbol;Acc:HGNC:9491]	serine protease(PC00203)	NA	NA	ENSG00000052344
ENSG00000052723	ENSG00000052723	1665.32	0.136369	0.232953	0.585392	0.558284	0.729037	ENSG00000052723	80143	SIKE1	1	114769479	114780685	-1	protein_coding	suppressor of IKBKE 1 [Source:HGNC Symbol;Acc:HGNC:26119]	NA	NA	NA	ENSG00000052723
ENSG00000052749	ENSG00000052749	1381.5	0.658036	0.30632	2.1482	0.0316981	0.105577	ENSG00000052749	23223	RRP12	10	97356358	97426076	-1	protein_coding	ribosomal RNA processing 12 homolog [Source:HGNC Symbol;Acc:HGNC:29100]	NA	NA	NA	ENSG00000052749
ENSG00000052795	ENSG00000052795	444.644	0.0938743	0.256825	0.365518	0.714725	0.838394	ENSG00000052795	57600	FNIP2	4	158769138	158908049	1	protein_coding	folliculin interacting protein 2 [Source:HGNC Symbol;Acc:HGNC:29280]	NA	NA	NA	ENSG00000052795
ENSG00000052802	ENSG00000052802	1528.34	-0.136206	0.219424	-0.620746	0.534767	0.710437	ENSG00000052802	6307	MSMO1	4	165327623	165343160	1	protein_coding	methylsterol monooxygenase 1 [Source:HGNC Symbol;Acc:HGNC:10545]	oxidase(PC00175)	NA	NA	ENSG00000052802
ENSG00000052841	ENSG00000052841	1609.58	0.827242	0.26916	3.07342	0.00211617	0.0130831	ENSG00000052841	55761	TTC17	11	43358932	43494933	1	protein_coding	tetratricopeptide repeat domain 17 [Source:HGNC Symbol;Acc:HGNC:25596]	NA	NA	NA	ENSG00000052841
ENSG00000052850	ENSG00000052850	30.8929	7.17243	1.04719	6.84923	7.42467e-12	4.62305e-10	ENSG00000052850	60529	ALX4	11	44260444	44310166	-1	protein_coding	ALX homeobox 4 [Source:HGNC Symbol;Acc:HGNC:450]	NA	NA	NA	ENSG00000052850
ENSG00000053108	ENSG00000053108	32.0551	-0.956931	0.461009	-2.07573	0.0379187	0.120561	ENSG00000053108	23105	FSTL4	5	133196455	133612564	-1	protein_coding	follistatin like 4 [Source:HGNC Symbol;Acc:HGNC:21389]	protease inhibitor(PC00191)	NA	NA	ENSG00000053108
ENSG00000053254	ENSG00000053254	2491.22	-1.03117	0.445613	-2.31405	0.0206651	0.0773831	ENSG00000053254	1112	FOXN3	14	89124871	89619149	-1	protein_coding	forkhead box N3 [Source:HGNC Symbol;Acc:HGNC:1928]	NA	NA	NA	ENSG00000053254
ENSG00000053328	ENSG00000053328	1.04396	0.658236	1.37984	0.477037	0.633336	NA	ENSG00000053328	728464	METTL24	6	110245928	110358272	-1	protein_coding	methyltransferase like 24 [Source:HGNC Symbol;Acc:HGNC:21566]	NA	NA	NA	ENSG00000053328
ENSG00000053371	ENSG00000053371	744.773	0.211196	0.178998	1.17988	0.23805	0.429333	ENSG00000053371	8574	AKR7A2	1	19303965	19312146	-1	protein_coding	aldo-keto reductase family 7 member A2 [Source:HGNC Symbol;Acc:HGNC:389]	reductase(PC00198)	NA	NA	ENSG00000053371
ENSG00000053372	ENSG00000053372	1537.66	0.961541	0.292572	3.28651	0.00101438	0.00731417	ENSG00000053372	51154	MRTO4	1	19251539	19260128	1	protein_coding	MRT4 homolog, ribosome maturation factor [Source:HGNC Symbol;Acc:HGNC:18477]	NA	NA	NA	ENSG00000053372
ENSG00000053438	ENSG00000053438	0.0820095	0	4.32804	0	1	NA	ENSG00000053438	4826	NNAT	20	37521215	37523693	1	protein_coding	neuronatin [Source:HGNC Symbol;Acc:HGNC:7860]	NA	NA	NA	ENSG00000053438
ENSG00000053501	ENSG00000053501	219.42	0.23607	0.178577	1.32195	0.186184	0.364411	ENSG00000053501	55850	USE1	19	17215346	17219829	1	protein_coding	unconventional SNARE in the ER 1 [Source:HGNC Symbol;Acc:HGNC:30882]	NA	NA	NA	ENSG00000053501
ENSG00000053524	ENSG00000053524	84.9667	-0.114199	0.332593	-0.343361	0.731327	0.849591	ENSG00000053524	23101	MCF2L2	3	183178043	183428778	-1	protein_coding	MCF.2 cell line derived transforming sequence-like 2 [Source:HGNC Symbol;Acc:HGNC:30319]	signaling molecule(PC00207)	NA	NA	ENSG00000053524
ENSG00000053702	ENSG00000053702	0.475573	0.865765	2.49908	0.346433	0.729017	NA	ENSG00000053702	83714	NRIP2	12	2825348	2835544	-1	protein_coding	nuclear receptor interacting protein 2 [Source:HGNC Symbol;Acc:HGNC:23078]	aspartic protease(PC00053)	NA	NA	ENSG00000053702
ENSG00000053747	ENSG00000053747	29.0065	0.913216	0.588908	1.55069	0.120975	0.272233	ENSG00000053747	3909	LAMA3	18	23689443	23955066	1	protein_coding	laminin subunit alpha 3 [Source:HGNC Symbol;Acc:HGNC:6483]	extracellular matrix linker protein(PC00101)	protease inhibitor(PC00191)	receptor(PC00197)	ENSG00000053747
ENSG00000053770	ENSG00000053770	1510.34	-0.444368	0.222009	-2.00157	0.0453307	0.136913	ENSG00000053770	55745	AP5M1	14	57268909	57298742	1	protein_coding	adaptor related protein complex 5 mu 1 subunit [Source:HGNC Symbol;Acc:HGNC:20192]	NA	NA	NA	ENSG00000053770
ENSG00000053900	ENSG00000053900	489.101	0.418857	0.279848	1.49673	0.134464	0.292761	ENSG00000053900	29945	ANAPC4	4	25377213	25418498	1	protein_coding	anaphase promoting complex subunit 4 [Source:HGNC Symbol;Acc:HGNC:19990]	NA	NA	NA	ENSG00000053900
ENSG00000053918	ENSG00000053918	10.6822	-1.31712	0.701899	-1.87652	0.0605845	0.168923	ENSG00000053918	3784	KCNQ1	11	2444684	2849109	1	protein_coding	potassium voltage-gated channel subfamily Q member 1 [Source:HGNC Symbol;Acc:HGNC:6294]	NA	NA	NA	ENSG00000053918
ENSG00000054116	ENSG00000054116	1374.33	0.312405	0.128439	2.43231	0.0150027	0.0604602	ENSG00000054116	27095	TRAPPC3	1	36136570	36156053	-1	protein_coding	trafficking protein particle complex 3 [Source:HGNC Symbol;Acc:HGNC:19942]	NA	NA	NA	ENSG00000054116
ENSG00000054118	ENSG00000054118	5107.73	-0.466525	0.143889	-3.24226	0.00118586	0.00826536	ENSG00000054118	9967	THRAP3	1	36224416	36305357	1	protein_coding	thyroid hormone receptor associated protein 3 [Source:HGNC Symbol;Acc:HGNC:22964]	transcription factor(PC00218)	NA	NA	ENSG00000054118
ENSG00000054148	ENSG00000054148	1604.52	0.506719	0.10644	4.76059	1.93029e-06	3.63891e-05	ENSG00000054148	29085	PHPT1	9	136848724	136851027	1	protein_coding	phosphohistidine phosphatase 1 [Source:HGNC Symbol;Acc:HGNC:30033]	NA	NA	NA	ENSG00000054148
ENSG00000054179	ENSG00000054179	0.177622	-0.525604	4.32804	-0.121442	0.903341	NA	ENSG00000054179	954	ENTPD2	9	137048098	137054045	-1	protein_coding	ectonucleoside triphosphate diphosphohydrolase 2 [Source:HGNC Symbol;Acc:HGNC:3364]	nucleotide phosphatase(PC00173)	NA	NA	ENSG00000054179
ENSG00000054219	ENSG00000054219	4.3887	1.27888	0.826187	1.54793	0.121638	0.273161	ENSG00000054219	4065	LY75	2	159803355	159904749	-1	protein_coding	lymphocyte antigen 75 [Source:HGNC Symbol;Acc:HGNC:6729]	NA	NA	NA	ENSG00000054219
ENSG00000054267	ENSG00000054267	1236.78	0.178945	0.128097	1.39694	0.162431	0.333435	ENSG00000054267	51742	ARID4B	1	235131634	235328219	-1	protein_coding	AT-rich interaction domain 4B [Source:HGNC Symbol;Acc:HGNC:15550]	transcription cofactor(PC00217)	NA	NA	ENSG00000054267
ENSG00000054277	ENSG00000054277	115.998	-0.668675	0.331555	-2.01679	0.0437177	0.133702	ENSG00000054277	23596	OPN3	1	241590102	241677376	-1	protein_coding	opsin 3 [Source:HGNC Symbol;Acc:HGNC:14007]	G-protein coupled receptor(PC00021)	NA	NA	ENSG00000054277
ENSG00000054282	ENSG00000054282	206.452	-0.142042	0.24504	-0.57967	0.562137	0.731574	ENSG00000054282	10806	SDCCAG8	1	243256034	243500092	1	protein_coding	serologically defined colon cancer antigen 8 [Source:HGNC Symbol;Acc:HGNC:10671]	NA	NA	NA	ENSG00000054282
ENSG00000054356	ENSG00000054356	4015.82	0.347099	0.118648	2.92544	0.00343965	0.0193749	ENSG00000054356	5798	PTPRN	2	219289623	219309648	-1	protein_coding	protein tyrosine phosphatase, receptor type N [Source:HGNC Symbol;Acc:HGNC:9676]	NA	NA	NA	ENSG00000054356
ENSG00000054392	ENSG00000054392	937.738	-0.458041	0.162213	-2.8237	0.00474726	0.0249528	ENSG00000054392	55733	HHAT	1	210328252	210676296	1	protein_coding	hedgehog acyltransferase [Source:HGNC Symbol;Acc:HGNC:18270]	acyltransferase(PC00042)	NA	NA	ENSG00000054392
ENSG00000054523	ENSG00000054523	2324.95	-0.732958	0.284447	-2.57679	0.00997239	0.0441046	ENSG00000054523	23095	KIF1B	1	10210805	10381603	1	protein_coding	kinesin family member 1B [Source:HGNC Symbol;Acc:HGNC:16636]	microtubule binding motor protein(PC00156)	NA	NA	ENSG00000054523
ENSG00000054598	ENSG00000054598	232.553	0.0179619	0.290114	0.0619134	0.950632	0.975474	ENSG00000054598	2296	FOXC1	6	1609972	1613897	1	protein_coding	forkhead box C1 [Source:HGNC Symbol;Acc:HGNC:3800]	DNA binding protein(PC00009)	winged helix/forkhead transcription factor(PC00246)	NA	ENSG00000054598
ENSG00000054611	ENSG00000054611	509.028	-0.561453	0.225526	-2.48953	0.0127912	0.053457	ENSG00000054611	25771	TBC1D22A	22	46762617	47175699	1	protein_coding	TBC1 domain family member 22A [Source:HGNC Symbol;Acc:HGNC:1309]	G-protein modulator(PC00022)	cysteine protease(PC00081)	NA	ENSG00000054611
ENSG00000054654	ENSG00000054654	3893.97	-0.568683	0.305187	-1.86339	0.062407	0.172477	ENSG00000054654	23224	SYNE2	14	63852983	64226433	1	protein_coding	spectrin repeat containing nuclear envelope protein 2 [Source:HGNC Symbol;Acc:HGNC:17084]	NA	NA	NA	ENSG00000054654
ENSG00000054690	ENSG00000054690	917.885	0.122887	0.255797	0.480409	0.630937	0.782288	ENSG00000054690	57475	PLEKHH1	14	67533301	67589612	1	protein_coding	pleckstrin homology, MyTH4 and FERM domain containing H1 [Source:HGNC Symbol;Acc:HGNC:17733]	NA	NA	NA	ENSG00000054690
ENSG00000054793	ENSG00000054793	1401.86	0.700302	0.250071	2.80042	0.00510367	0.0263626	ENSG00000054793	10079	ATP9A	20	51596514	51768634	-1	protein_coding	ATPase phospholipid transporting 9A (putative) [Source:HGNC Symbol;Acc:HGNC:13540]	cation transporter(PC00068)	hydrolase(PC00121)	NA	ENSG00000054793
ENSG00000054796	ENSG00000054796	0	NA	NA	NA	NA	NA	ENSG00000054796	23626	SPO11	20	57329759	57343994	1	protein_coding	SPO11, initiator of meiotic double stranded breaks [Source:HGNC Symbol;Acc:HGNC:11250]	DNA binding protein(PC00009)	NA	NA	ENSG00000054796
ENSG00000054803	ENSG00000054803	8.08505	-0.41871	0.722789	-0.579297	0.562388	0.73175	ENSG00000054803	140689	CBLN4	20	55997440	56005472	-1	protein_coding	cerebellin 4 precursor [Source:HGNC Symbol;Acc:HGNC:16231]	NA	NA	NA	ENSG00000054803
ENSG00000054938	ENSG00000054938	0.0820095	0	4.32804	0	1	NA	ENSG00000054938	25884	CHRDL2	11	74696429	74731385	-1	protein_coding	chordin like 2 [Source:HGNC Symbol;Acc:HGNC:24168]	NA	NA	NA	ENSG00000054938
ENSG00000054965	ENSG00000054965	2194.07	-0.523409	0.333787	-1.5681	0.116859	0.266095	ENSG00000054965	23201	FAM168A	11	73400487	73598189	-1	protein_coding	family with sequence similarity 168 member A [Source:HGNC Symbol;Acc:HGNC:28999]	NA	NA	NA	ENSG00000054965
ENSG00000054967	ENSG00000054967	473.372	1.04975	0.243176	4.31683	1.58284e-05	0.000228131	ENSG00000054967	84957	RELT	11	73376264	73397474	1	protein_coding	RELT, TNF receptor [Source:HGNC Symbol;Acc:HGNC:13764]	NA	NA	NA	ENSG00000054967
ENSG00000054983	ENSG00000054983	1118.16	-1.70265	0.263666	-6.45761	1.06367e-10	5.36716e-09	ENSG00000054983	2581	GALC	14	87837820	87993665	-1	protein_coding	galactosylceramidase [Source:HGNC Symbol;Acc:HGNC:4115]	NA	NA	NA	ENSG00000054983
ENSG00000055044	ENSG00000055044	3574.23	0.547507	0.310859	1.76127	0.0781931	0.201213	ENSG00000055044	51602	NOP58	2	202265716	202303666	1	protein_coding	NOP58 ribonucleoprotein [Source:HGNC Symbol;Acc:HGNC:29926]	ribonucleoprotein(PC00201)	NA	NA	ENSG00000055044
ENSG00000055070	ENSG00000055070	4178.95	0.185864	0.317061	0.586208	0.557735	0.728634	ENSG00000055070	26099	SZRD1	1	16352575	16398145	1	protein_coding	SUZ RNA binding domain containing 1 [Source:HGNC Symbol;Acc:HGNC:30232]	NA	NA	NA	ENSG00000055070
ENSG00000055118	ENSG00000055118	163.202	1.16002	0.24665	4.70312	2.56216e-06	4.68679e-05	ENSG00000055118	3757	KCNH2	7	150944961	150978315	-1	protein_coding	potassium voltage-gated channel subfamily H member 2 [Source:HGNC Symbol;Acc:HGNC:6251]	NA	NA	NA	ENSG00000055118
ENSG00000055130	ENSG00000055130	709.677	0.155505	0.130351	1.19297	0.232882	0.423193	ENSG00000055130	8454	CUL1	7	148697914	148801036	1	protein_coding	cullin 1 [Source:HGNC Symbol;Acc:HGNC:2551]	ubiquitin-protein ligase(PC00234)	NA	NA	ENSG00000055130
ENSG00000055147	ENSG00000055147	613.158	-0.291442	0.201376	-1.44725	0.147826	0.312592	ENSG00000055147	10827	FAM114A2	5	153990128	154038936	-1	protein_coding	family with sequence similarity 114 member A2 [Source:HGNC Symbol;Acc:HGNC:1333]	NA	NA	NA	ENSG00000055147
ENSG00000055163	ENSG00000055163	2878.52	0.841264	0.176735	4.76005	1.93549e-06	3.64599e-05	ENSG00000055163	26999	CYFIP2	5	157266079	157395595	1	protein_coding	cytoplasmic FMR1 interacting protein 2 [Source:HGNC Symbol;Acc:HGNC:13760]	G-protein modulator(PC00022)	NA	NA	ENSG00000055163
ENSG00000055208	ENSG00000055208	3653.26	-0.241059	0.248313	-0.970787	0.331654	0.530363	ENSG00000055208	23118	TAB2	6	149218641	149411613	1	protein_coding	TGF-beta activated kinase 1/MAP3K7 binding protein 2 [Source:HGNC Symbol;Acc:HGNC:17075]	NA	NA	NA	ENSG00000055208
ENSG00000055211	ENSG00000055211	1454.44	-0.173556	0.148629	-1.16771	0.242923	0.435267	ENSG00000055211	116254	GINM1	6	149566294	149591748	1	protein_coding	glycoprotein integral membrane 1 [Source:HGNC Symbol;Acc:HGNC:21074]	NA	NA	NA	ENSG00000055211
ENSG00000055332	ENSG00000055332	2288.21	-0.461678	0.23648	-1.95229	0.0509037	0.149009	ENSG00000055332	5610	EIF2AK2	2	37099210	37157065	-1	protein_coding	eukaryotic translation initiation factor 2 alpha kinase 2 [Source:HGNC Symbol;Acc:HGNC:9437]	non-receptor serine/threonine protein kinase(PC00167)	NA	NA	ENSG00000055332
ENSG00000055483	ENSG00000055483	1989.81	0.242984	0.154317	1.57458	0.115354	0.263523	ENSG00000055483	57602	USP36	17	78787381	78841441	-1	protein_coding	ubiquitin specific peptidase 36 [Source:HGNC Symbol;Acc:HGNC:20062]	cysteine protease(PC00081)	NA	NA	ENSG00000055483
ENSG00000055609	ENSG00000055609	378.762	0.204577	0.313925	0.651676	0.51461	0.69398	ENSG00000055609	58508	KMT2C	7	152134922	152436005	-1	protein_coding	lysine methyltransferase 2C [Source:HGNC Symbol;Acc:HGNC:13726]	NA	NA	NA	ENSG00000055609
ENSG00000055732	ENSG00000055732	2.21363	1.28421	1.10988	1.15707	0.247244	0.4397	ENSG00000055732	55283	MCOLN3	1	85018082	85048499	-1	protein_coding	mucolipin 3 [Source:HGNC Symbol;Acc:HGNC:13358]	ion channel(PC00133)	NA	NA	ENSG00000055732
ENSG00000055813	ENSG00000055813	88.4787	-0.474644	0.624035	-0.760606	0.446892	0.637311	ENSG00000055813	114800	CCDC85A	2	56184123	56386173	1	protein_coding	coiled-coil domain containing 85A [Source:HGNC Symbol;Acc:HGNC:29400]	NA	NA	NA	ENSG00000055813
ENSG00000055917	ENSG00000055917	3059.77	-0.237796	0.209665	-1.13417	0.256723	0.450441	ENSG00000055917	23369	PUM2	2	20248691	20352234	-1	protein_coding	pumilio RNA binding family member 2 [Source:HGNC Symbol;Acc:HGNC:14958]	mRNA processing factor(PC00147)	translation factor(PC00223)	NA	ENSG00000055917
ENSG00000055950	ENSG00000055950	1069.89	-0.157842	0.0769279	-2.05182	0.040187	0.125765	ENSG00000055950	84545	MRPL43	10	100969458	100987515	-1	protein_coding	mitochondrial ribosomal protein L43 [Source:HGNC Symbol;Acc:HGNC:14517]	ribosomal protein(PC00202)	NA	NA	ENSG00000055950
ENSG00000055955	ENSG00000055955	54.45	0.557836	0.644634	0.865353	0.386845	0.584475	ENSG00000055955	3700	ITIH4	3	52812975	52831479	-1	protein_coding	inter-alpha-trypsin inhibitor heavy chain family member 4 [Source:HGNC Symbol;Acc:HGNC:6169]	serine protease inhibitor(PC00204)	NA	NA	ENSG00000055955
ENSG00000055957	ENSG00000055957	0.479055	1.6105	2.86354	0.562415	0.573833	NA	ENSG00000055957	3697	ITIH1	3	52777592	52792068	1	protein_coding	inter-alpha-trypsin inhibitor heavy chain 1 [Source:HGNC Symbol;Acc:HGNC:6166]	serine protease inhibitor(PC00204)	NA	NA	ENSG00000055957
ENSG00000056050	ENSG00000056050	516.23	0.026041	0.12201	0.213434	0.830989	0.909894	ENSG00000056050	54969	HPF1	4	169729465	169757953	-1	protein_coding	histone PARylation factor 1 [Source:HGNC Symbol;Acc:HGNC:26051]	NA	NA	NA	ENSG00000056050
ENSG00000056097	ENSG00000056097	4709.72	-0.0896868	0.159672	-0.561693	0.574325	0.74034	ENSG00000056097	51663	ZFR	5	32354350	32444761	-1	protein_coding	zinc finger RNA binding protein [Source:HGNC Symbol;Acc:HGNC:17277]	mRNA processing factor(PC00147)	NA	NA	ENSG00000056097
ENSG00000056277	ENSG00000056277	205.798	-0.244695	0.113746	-2.15124	0.031457	0.105023	ENSG00000056277	55609	ZNF280C	X	130202711	130268899	-1	protein_coding	zinc finger protein 280C [Source:HGNC Symbol;Acc:HGNC:25955]	NA	NA	NA	ENSG00000056277
ENSG00000056291	ENSG00000056291	503.937	-0.322264	0.161833	-1.99134	0.0464432	0.13939	ENSG00000056291	10886	NPFFR2	4	72031804	72148067	1	protein_coding	neuropeptide FF receptor 2 [Source:HGNC Symbol;Acc:HGNC:4525]	G-protein coupled receptor(PC00021)	NA	NA	ENSG00000056291
ENSG00000056487	ENSG00000056487	270.847	0.353607	0.46416	0.761821	0.446167	0.636697	ENSG00000056487	112885	PHF21B	22	44881162	45009999	-1	protein_coding	PHD finger protein 21B [Source:HGNC Symbol;Acc:HGNC:25161]	NA	NA	NA	ENSG00000056487
ENSG00000056558	ENSG00000056558	273.635	3.12387	0.508405	6.14444	8.02455e-10	3.4434e-08	ENSG00000056558	7185	TRAF1	9	120902393	120929173	-1	protein_coding	TNF receptor associated factor 1 [Source:HGNC Symbol;Acc:HGNC:12031]	signaling molecule(PC00207)	NA	NA	ENSG00000056558
ENSG00000056586	ENSG00000056586	1213.86	-0.278694	0.317998	-0.876402	0.380812	0.578628	ENSG00000056586	54542	RC3H2	9	122844556	122905341	-1	protein_coding	ring finger and CCCH-type domains 2 [Source:HGNC Symbol;Acc:HGNC:21461]	NA	NA	NA	ENSG00000056586
ENSG00000056736	ENSG00000056736	78.7159	-0.564918	0.319469	-1.7683	0.0770105	0.199123	ENSG00000056736	55540	IL17RB	3	53846580	53865800	1	protein_coding	interleukin 17 receptor B [Source:HGNC Symbol;Acc:HGNC:18015]	NA	NA	NA	ENSG00000056736
ENSG00000056972	ENSG00000056972	248.31	0.189903	0.23406	0.811342	0.417169	0.611826	ENSG00000056972	10758	TRAF3IP2	6	111556454	111606278	-1	protein_coding	TRAF3 interacting protein 2 [Source:HGNC Symbol;Acc:HGNC:1343]	NA	NA	NA	ENSG00000056972
ENSG00000056998	ENSG00000056998	293.83	-0.49821	0.33972	-1.46653	0.142503	0.304779	ENSG00000056998	8908	GYG2	X	2828788	2882820	1	protein_coding	glycogenin 2 [Source:HGNC Symbol;Acc:HGNC:4700]	glycosyltransferase(PC00111)	NA	NA	ENSG00000056998
ENSG00000057019	ENSG00000057019	11986.8	-1.08041	0.228353	-4.73132	2.23063e-06	4.14026e-05	ENSG00000057019	131566	DCBLD2	3	98795941	98901689	-1	protein_coding	discoidin, CUB and LCCL domain containing 2 [Source:HGNC Symbol;Acc:HGNC:24627]	NA	NA	NA	ENSG00000057019
ENSG00000057149	ENSG00000057149	8.56752	4.86147	2.49298	1.95007	NA	NA	ENSG00000057149	6317	SERPINB3	18	63655197	63661963	-1	protein_coding	serpin family B member 3 [Source:HGNC Symbol;Acc:HGNC:10569]	serine protease inhibitor(PC00204)	NA	NA	ENSG00000057149
ENSG00000057252	ENSG00000057252	1819.13	-0.130214	0.201964	-0.644738	0.519097	0.697575	ENSG00000057252	6646	SOAT1	1	179293714	179358680	1	protein_coding	sterol O-acyltransferase 1 [Source:HGNC Symbol;Acc:HGNC:11177]	acyltransferase(PC00042)	NA	NA	ENSG00000057252
ENSG00000057294	ENSG00000057294	1172.41	-1.20941	0.278194	-4.34739	1.3777e-05	0.000203436	ENSG00000057294	5318	PKP2	12	32790745	32896840	-1	protein_coding	plakophilin 2 [Source:HGNC Symbol;Acc:HGNC:9024]	intermediate filament binding protein(PC00130)	NA	NA	ENSG00000057294
ENSG00000057468	ENSG00000057468	4.96176	1.70339	1.00778	1.69025	0.090981	0.223003	ENSG00000057468	4438	MSH4	1	75796882	75913238	1	protein_coding	mutS homolog 4 [Source:HGNC Symbol;Acc:HGNC:7327]	DNA binding protein(PC00009)	NA	NA	ENSG00000057468
ENSG00000057593	ENSG00000057593	1.13452	-1.14084	1.5227	-0.749223	0.453723	NA	ENSG00000057593	2155	F7	13	113105788	113120681	1	protein_coding	coagulation factor VII [Source:HGNC Symbol;Acc:HGNC:3544]	serine protease(PC00203)	NA	NA	ENSG00000057593
ENSG00000057608	ENSG00000057608	6740.66	-0.167149	0.182755	-0.914604	0.360399	0.558608	ENSG00000057608	2665	GDI2	10	5765223	5842132	-1	protein_coding	GDP dissociation inhibitor 2 [Source:HGNC Symbol;Acc:HGNC:4227]	G-protein modulator(PC00022)	acyltransferase(PC00042)	NA	ENSG00000057608
ENSG00000057657	ENSG00000057657	135.719	-0.392235	0.625761	-0.626814	NA	NA	ENSG00000057657	639	PRDM1	6	106086320	106109939	1	protein_coding	PR/SET domain 1 [Source:HGNC Symbol;Acc:HGNC:9346]	NA	NA	NA	ENSG00000057657
ENSG00000057663	ENSG00000057663	774.16	-0.285411	0.199273	-1.43227	0.152068	0.31853	ENSG00000057663	9474	ATG5	6	106045423	106325791	-1	protein_coding	autophagy related 5 [Source:HGNC Symbol;Acc:HGNC:589]	membrane trafficking regulatory protein(PC00151)	NA	NA	ENSG00000057663
ENSG00000057704	ENSG00000057704	39.8707	-1.07397	0.631377	-1.701	0.0889439	0.219666	ENSG00000057704	57458	TMCC3	12	94567124	94650562	-1	protein_coding	transmembrane and coiled-coil domain family 3 [Source:HGNC Symbol;Acc:HGNC:29199]	NA	NA	NA	ENSG00000057704
ENSG00000057757	ENSG00000057757	927.132	0.160878	0.191316	0.840902	0.400403	0.597602	ENSG00000057757	57095	PITHD1	1	23778405	23788232	1	protein_coding	PITH domain containing 1 [Source:HGNC Symbol;Acc:HGNC:25022]	NA	NA	NA	ENSG00000057757
ENSG00000057935	ENSG00000057935	1580.29	0.00492918	0.207408	0.0237656	0.98104	0.991772	ENSG00000057935	57504	MTA3	2	42494569	42756947	1	protein_coding	metastasis associated 1 family member 3 [Source:HGNC Symbol;Acc:HGNC:23784]	chromatin/chromatin-binding protein(PC00077)	histone(PC00118)	NA	ENSG00000057935
ENSG00000058056	ENSG00000058056	1246.58	-1.17711	0.23248	-5.06327	4.1213e-07	9.41234e-06	ENSG00000058056	8975	USP13	3	179652755	179789401	1	protein_coding	ubiquitin specific peptidase 13 (isopeptidase T-3) [Source:HGNC Symbol;Acc:HGNC:12611]	cysteine protease(PC00081)	NA	NA	ENSG00000058056
ENSG00000058063	ENSG00000058063	3565.86	-0.808801	0.342661	-2.36035	0.0182576	0.0705197	ENSG00000058063	23200	ATP11B	3	182793500	182921635	1	protein_coding	ATPase phospholipid transporting 11B (putative) [Source:HGNC Symbol;Acc:HGNC:13553]	cation transporter(PC00068)	hydrolase(PC00121)	NA	ENSG00000058063
ENSG00000058085	ENSG00000058085	2333.66	0.265516	0.30099	0.88214	0.377701	0.575475	ENSG00000058085	3918	LAMC2	1	183186238	183244900	1	protein_coding	laminin subunit gamma 2 [Source:HGNC Symbol;Acc:HGNC:6493]	extracellular matrix linker protein(PC00101)	protease inhibitor(PC00191)	receptor(PC00197)	ENSG00000058085
ENSG00000058091	ENSG00000058091	2253.96	-0.771274	0.428155	-1.80139	0.0716416	0.189604	ENSG00000058091	5218	CDK14	7	90466424	91210590	1	protein_coding	cyclin dependent kinase 14 [Source:HGNC Symbol;Acc:HGNC:8883]	non-receptor serine/threonine protein kinase(PC00167)	non-receptor tyrosine protein kinase(PC00168)	NA	ENSG00000058091
ENSG00000058262	ENSG00000058262	7189.95	-0.0828495	0.218538	-0.379108	0.704608	0.832087	ENSG00000058262	29927	SEC61A1	3	128051641	128071683	1	protein_coding	Sec61 translocon alpha 1 subunit [Source:HGNC Symbol;Acc:HGNC:18276]	membrane traffic protein(PC00150)	transporter(PC00227)	NA	ENSG00000058262
ENSG00000058272	ENSG00000058272	1877.39	-0.409848	0.296928	-1.38029	0.167497	0.340133	ENSG00000058272	4659	PPP1R12A	12	79773563	79935460	-1	protein_coding	protein phosphatase 1 regulatory subunit 12A [Source:HGNC Symbol;Acc:HGNC:7618]	NA	NA	NA	ENSG00000058272
ENSG00000058335	ENSG00000058335	1672.07	-0.59898	0.302443	-1.98047	0.0476506	0.142069	ENSG00000058335	5923	RASGRF1	15	78959947	79090773	-1	protein_coding	Ras protein specific guanine nucleotide releasing factor 1 [Source:HGNC Symbol;Acc:HGNC:9875]	guanyl-nucleotide exchange factor(PC00113)	NA	NA	ENSG00000058335
ENSG00000058404	ENSG00000058404	23.4712	0.110928	0.477132	0.23249	0.816157	0.902439	ENSG00000058404	816	CAMK2B	7	44217150	44334577	-1	protein_coding	calcium/calmodulin dependent protein kinase II beta [Source:HGNC Symbol;Acc:HGNC:1461]	NA	NA	NA	ENSG00000058404
ENSG00000058453	ENSG00000058453	525.396	1.06171	0.337147	3.1491	0.00163772	0.0106965	ENSG00000058453	9696	CROCC	1	16740273	16972979	1	protein_coding	ciliary rootlet coiled-coil, rootletin [Source:HGNC Symbol;Acc:HGNC:21299]	kinase modulator(PC00140)	viral protein(PC00237)	NA	ENSG00000058453
ENSG00000058600	ENSG00000058600	992.482	0.0811839	0.148352	0.547239	0.584215	0.747416	ENSG00000058600	55718	POLR3E	16	22297375	22335103	1	protein_coding	RNA polymerase III subunit E [Source:HGNC Symbol;Acc:HGNC:30347]	DNA-directed RNA polymerase(PC00019)	NA	NA	ENSG00000058600
ENSG00000058668	ENSG00000058668	1918.81	0.312481	0.248109	1.25945	0.207867	0.393001	ENSG00000058668	493	ATP2B4	1	203626561	203744081	1	protein_coding	ATPase plasma membrane Ca2+ transporting 4 [Source:HGNC Symbol;Acc:HGNC:817]	cation transporter(PC00068)	hydrolase(PC00121)	ion channel(PC00133)	ENSG00000058668
ENSG00000058673	ENSG00000058673	6369.83	0.258828	0.123984	2.08759	0.036835	0.118051	ENSG00000058673	9877	ZC3H11A	1	203795654	203854999	1	protein_coding	zinc finger CCCH-type containing 11A [Source:HGNC Symbol;Acc:HGNC:29093]	nucleic acid binding(PC00171)	NA	NA	ENSG00000058673
ENSG00000058729	ENSG00000058729	699.08	0.667844	0.131402	5.08243	3.72633e-07	8.64236e-06	ENSG00000058729	55781	RIOK2	5	97160867	97183260	-1	protein_coding	RIO kinase 2 [Source:HGNC Symbol;Acc:HGNC:18999]	NA	NA	NA	ENSG00000058729
ENSG00000058799	ENSG00000058799	585.287	0.502154	0.119807	4.19137	2.77281e-05	0.000366423	ENSG00000058799	54432	YIPF1	1	53851719	53889834	-1	protein_coding	Yip1 domain family member 1 [Source:HGNC Symbol;Acc:HGNC:25231]	NA	NA	NA	ENSG00000058799
ENSG00000058804	ENSG00000058804	1720.59	-0.230025	0.230143	-0.99949	0.317558	0.516091	ENSG00000058804	55706	NDC1	1	53765460	53838860	-1	protein_coding	NDC1 transmembrane nucleoporin [Source:HGNC Symbol;Acc:HGNC:25525]	NA	NA	NA	ENSG00000058804
ENSG00000058866	ENSG00000058866	175.018	-0.702978	0.394915	-1.78007	0.0750639	0.195701	ENSG00000058866	1608	DGKG	3	186105668	186362237	-1	protein_coding	diacylglycerol kinase gamma [Source:HGNC Symbol;Acc:HGNC:2853]	kinase(PC00137)	NA	NA	ENSG00000058866
ENSG00000059122	ENSG00000059122	967.836	0.490023	0.16898	2.89989	0.00373297	0.0206182	ENSG00000059122	84256	FLYWCH1	16	2911937	2951208	1	protein_coding	FLYWCH-type zinc finger 1 [Source:HGNC Symbol;Acc:HGNC:25404]	NA	NA	NA	ENSG00000059122
ENSG00000059145	ENSG00000059145	861.968	0.191515	0.15498	1.23574	0.216556	0.403577	ENSG00000059145	64718	UNKL	16	1363205	1414751	-1	protein_coding	unkempt family like zinc finger [Source:HGNC Symbol;Acc:HGNC:14184]	NA	NA	NA	ENSG00000059145
ENSG00000059377	ENSG00000059377	14.8873	-0.148986	0.549	-0.271377	0.786101	0.884726	ENSG00000059377	6916	TBXAS1	7	139777051	140020325	1	protein_coding	thromboxane A synthase 1 [Source:HGNC Symbol;Acc:HGNC:11609]	NA	NA	NA	ENSG00000059377
ENSG00000059378	ENSG00000059378	453.187	0.808839	0.180151	4.48978	7.12964e-06	0.000114801	ENSG00000059378	64761	PARP12	7	140023744	140063721	-1	protein_coding	poly(ADP-ribose) polymerase family member 12 [Source:HGNC Symbol;Acc:HGNC:21919]	NA	NA	NA	ENSG00000059378
ENSG00000059573	ENSG00000059573	2927.36	-0.0175441	0.107398	-0.163355	0.870239	0.93236	ENSG00000059573	5832	ALDH18A1	10	95605929	95656706	-1	protein_coding	aldehyde dehydrogenase 18 family member A1 [Source:HGNC Symbol;Acc:HGNC:9722]	amino acid kinase(PC00045)	dehydrogenase(PC00092)	NA	ENSG00000059573
ENSG00000059588	ENSG00000059588	206.78	1.13253	0.453993	2.49461	0.0126097	0.0529172	ENSG00000059588	6894	TARBP1	1	234391313	234479103	-1	protein_coding	TAR (HIV-1) RNA binding protein 1 [Source:HGNC Symbol;Acc:HGNC:11568]	NA	NA	NA	ENSG00000059588
ENSG00000059691	ENSG00000059691	363.273	0.0773256	0.155135	0.498441	0.618174	0.77287	ENSG00000059691	5188	GATB	4	151670504	151761023	-1	protein_coding	glutamyl-tRNA amidotransferase subunit B [Source:HGNC Symbol;Acc:HGNC:8849]	ligase(PC00142)	NA	NA	ENSG00000059691
ENSG00000059728	ENSG00000059728	135.989	0.639014	0.348245	1.83496	0.0665122	0.180024	ENSG00000059728	4084	MXD1	2	69897688	69942945	1	protein_coding	MAX dimerization protein 1 [Source:HGNC Symbol;Acc:HGNC:6761]	basic helix-loop-helix transcription factor(PC00055)	NA	NA	ENSG00000059728
ENSG00000059758	ENSG00000059758	545.746	-0.115255	0.201679	-0.571478	0.567676	0.7357	ENSG00000059758	5128	CDK17	12	96278261	96400560	-1	protein_coding	cyclin dependent kinase 17 [Source:HGNC Symbol;Acc:HGNC:8750]	non-receptor serine/threonine protein kinase(PC00167)	non-receptor tyrosine protein kinase(PC00168)	NA	ENSG00000059758
ENSG00000059769	ENSG00000059769	241.051	1.19111	0.249478	4.7744	1.80244e-06	3.4106e-05	ENSG00000059769	548645	DNAJC25	9	111631352	111654351	1	protein_coding	DnaJ heat shock protein family (Hsp40) member C25 [Source:HGNC Symbol;Acc:HGNC:34187]	NA	NA	NA	ENSG00000059769
ENSG00000059804	ENSG00000059804	2112.68	0.375269	0.46827	0.801394	0.422903	0.617014	ENSG00000059804	6515	SLC2A3	12	7919230	7936275	-1	protein_coding	solute carrier family 2 member 3 [Source:HGNC Symbol;Acc:HGNC:11007]	NA	NA	NA	ENSG00000059804
ENSG00000059915	ENSG00000059915	127.333	-0.846211	0.496789	-1.70336	0.0885004	0.218849	ENSG00000059915	5662	PSD	10	102402617	102421539	-1	protein_coding	pleckstrin and Sec7 domain containing [Source:HGNC Symbol;Acc:HGNC:9507]	NA	NA	NA	ENSG00000059915
ENSG00000060069	ENSG00000060069	556.788	0.506448	0.135428	3.73962	0.000184299	0.00183139	ENSG00000060069	9150	CTDP1	18	79679801	79756623	1	protein_coding	CTD phosphatase subunit 1 [Source:HGNC Symbol;Acc:HGNC:2498]	protein phosphatase(PC00195)	NA	NA	ENSG00000060069
ENSG00000060138	ENSG00000060138	8518.46	0.689696	0.110569	6.23767	4.44125e-10	2.00491e-08	ENSG00000060138	8531	YBX3	12	10699089	10723312	-1	protein_coding	Y-box binding protein 3 [Source:HGNC Symbol;Acc:HGNC:2428]	NA	NA	NA	ENSG00000060138
ENSG00000060140	ENSG00000060140	119.903	-0.00588857	0.347117	-0.0169642	0.986465	0.994133	ENSG00000060140	55359	STYK1	12	10618939	10674318	-1	protein_coding	serine/threonine/tyrosine kinase 1 [Source:HGNC Symbol;Acc:HGNC:18889]	NA	NA	NA	ENSG00000060140
ENSG00000060237	ENSG00000060237	6494.66	-0.38366	0.195034	-1.96714	0.0491668	0.145265	ENSG00000060237	65125	WNK1	12	752593	911452	1	protein_coding	WNK lysine deficient protein kinase 1 [Source:HGNC Symbol;Acc:HGNC:14540]	non-receptor serine/threonine protein kinase(PC00167)	NA	NA	ENSG00000060237
ENSG00000060303	ENSG00000060303	0.471669	-2.8399	2.21977	-1.27936	0.200769	NA	ENSG00000060303	NA	RPS17P5	6	50857255	50857662	-1	processed_pseudogene	ribosomal protein S17 pseudogene 5 [Source:HGNC Symbol;Acc:HGNC:21352]	NA	NA	NA	ENSG00000060303
ENSG00000060339	ENSG00000060339	3553.77	0.641112	0.3276	1.957	0.0503478	0.147793	ENSG00000060339	55749	CCAR1	10	68721012	68792377	1	protein_coding	cell division cycle and apoptosis regulator 1 [Source:HGNC Symbol;Acc:HGNC:24236]	calmodulin(PC00061)	NA	NA	ENSG00000060339
ENSG00000060491	ENSG00000060491	1421.18	0.00444723	0.180626	0.0246212	0.980357	0.991337	ENSG00000060491	11054	OGFR	20	62804835	62814000	1	protein_coding	opioid growth factor receptor [Source:HGNC Symbol;Acc:HGNC:15768]	receptor(PC00197)	NA	NA	ENSG00000060491
ENSG00000060558	ENSG00000060558	6.73827	2.13334	1.15195	1.85194	0.0640344	0.175434	ENSG00000060558	2769	GNA15	19	3136193	3163769	1	protein_coding	G protein subunit alpha 15 [Source:HGNC Symbol;Acc:HGNC:4383]	heterotrimeric G-protein(PC00117)	NA	NA	ENSG00000060558
ENSG00000060566	ENSG00000060566	4.19241	1.60048	1.1216	1.42696	0.153592	0.320707	ENSG00000060566	84699	CREB3L3	19	4153601	4173054	1	protein_coding	cAMP responsive element binding protein 3 like 3 [Source:HGNC Symbol;Acc:HGNC:18855]	NA	NA	NA	ENSG00000060566
ENSG00000060642	ENSG00000060642	370.426	-0.298273	0.104304	-2.85965	0.00424103	0.0228405	ENSG00000060642	55650	PIGV	1	26787472	26798398	1	protein_coding	phosphatidylinositol glycan anchor biosynthesis class V [Source:HGNC Symbol;Acc:HGNC:26031]	NA	NA	NA	ENSG00000060642
ENSG00000060656	ENSG00000060656	1661.19	0.728809	0.262988	2.77127	0.00558384	0.0283225	ENSG00000060656	10076	PTPRU	1	29236516	29326813	1	protein_coding	protein tyrosine phosphatase, receptor type U [Source:HGNC Symbol;Acc:HGNC:9683]	protein phosphatase(PC00195)	receptor(PC00197)	NA	ENSG00000060656
ENSG00000060688	ENSG00000060688	1565.83	0.131208	0.218883	0.599441	0.548879	0.721516	ENSG00000060688	9410	SNRNP40	1	31259568	31296782	-1	protein_coding	small nuclear ribonucleoprotein U5 subunit 40 [Source:HGNC Symbol;Acc:HGNC:30857]	NA	NA	NA	ENSG00000060688
ENSG00000060709	ENSG00000060709	55.0007	0.247513	0.548108	0.451578	0.651573	0.796617	ENSG00000060709	23504	RIMBP2	12	130396137	130517917	-1	protein_coding	RIMS binding protein 2 [Source:HGNC Symbol;Acc:HGNC:30339]	NA	NA	NA	ENSG00000060709
ENSG00000060718	ENSG00000060718	4824.06	-1.09679	0.40494	-2.70852	0.00675849	0.0328756	ENSG00000060718	1301	COL11A1	1	102876467	103108496	-1	protein_coding	collagen type XI alpha 1 chain [Source:HGNC Symbol;Acc:HGNC:2186]	NA	NA	NA	ENSG00000060718
ENSG00000060749	ENSG00000060749	3529.23	-0.420973	0.256736	-1.63971	0.101066	0.240533	ENSG00000060749	79832	QSER1	11	32893178	32993316	1	protein_coding	glutamine and serine rich 1 [Source:HGNC Symbol;Acc:HGNC:26154]	NA	NA	NA	ENSG00000060749
ENSG00000060762	ENSG00000060762	346.254	0.391941	0.15178	2.5823	0.00981454	0.043536	ENSG00000060762	51660	MPC1	6	166364919	166383013	-1	protein_coding	mitochondrial pyruvate carrier 1 [Source:HGNC Symbol;Acc:HGNC:21606]	NA	NA	NA	ENSG00000060762
ENSG00000060971	ENSG00000060971	808.985	0.701687	0.208944	3.35826	0.000784358	0.0059367	ENSG00000060971	30	ACAA1	3	38103129	38137242	-1	protein_coding	acetyl-CoA acyltransferase 1 [Source:HGNC Symbol;Acc:HGNC:82]	acetyltransferase(PC00038)	NA	NA	ENSG00000060971
ENSG00000060982	ENSG00000060982	3664.15	-0.722001	0.254203	-2.84025	0.00450784	0.02398	ENSG00000060982	586	BCAT1	12	24810022	24949459	-1	protein_coding	branched chain amino acid transaminase 1 [Source:HGNC Symbol;Acc:HGNC:976]	transaminase(PC00216)	NA	NA	ENSG00000060982
ENSG00000061273	ENSG00000061273	3128.01	0.464526	0.175228	2.65098	0.00802598	0.0372835	ENSG00000061273	51564	HDAC7	12	47782722	47833132	-1	protein_coding	histone deacetylase 7 [Source:HGNC Symbol;Acc:HGNC:14067]	NA	NA	NA	ENSG00000061273
ENSG00000061337	ENSG00000061337	242.642	-0.8034	0.315842	-2.54368	0.0109691	0.0475297	ENSG00000061337	11178	LZTS1	8	20246165	20303963	-1	protein_coding	leucine zipper tumor suppressor 1 [Source:HGNC Symbol;Acc:HGNC:13861]	NA	NA	NA	ENSG00000061337
ENSG00000061455	ENSG00000061455	11.2183	-1.00416	1.14708	-0.875402	0.381355	0.579193	ENSG00000061455	93166	PRDM6	5	123089121	123194266	1	protein_coding	PR/SET domain 6 [Source:HGNC Symbol;Acc:HGNC:9350]	NA	NA	NA	ENSG00000061455
ENSG00000061492	ENSG00000061492	0	NA	NA	NA	NA	NA	ENSG00000061492	7478	WNT8A	5	138083892	138092365	1	protein_coding	Wnt family member 8A [Source:HGNC Symbol;Acc:HGNC:12788]	signaling molecule(PC00207)	NA	NA	ENSG00000061492
ENSG00000061656	ENSG00000061656	118.151	2.53456	0.440633	5.75208	8.81507e-09	3.0033e-07	ENSG00000061656	6676	SPAG4	20	35615892	35621049	1	protein_coding	sperm associated antigen 4 [Source:HGNC Symbol;Acc:HGNC:11214]	non-motor microtubule binding protein(PC00166)	NA	NA	ENSG00000061656
ENSG00000061676	ENSG00000061676	6414.46	-0.0669806	0.122174	-0.548237	0.583529	0.746906	ENSG00000061676	10787	NCKAP1	2	182909115	183038858	-1	protein_coding	NCK associated protein 1 [Source:HGNC Symbol;Acc:HGNC:7666]	NA	NA	NA	ENSG00000061676
ENSG00000061794	ENSG00000061794	1019.98	0.143197	0.136514	1.04896	0.294198	0.492876	ENSG00000061794	60488	MRPS35	12	27710773	27756295	1	protein_coding	mitochondrial ribosomal protein S35 [Source:HGNC Symbol;Acc:HGNC:16635]	ribosomal protein(PC00202)	NA	NA	ENSG00000061794
ENSG00000061918	ENSG00000061918	136.095	-0.292924	0.405367	-0.722616	0.469916	0.656035	ENSG00000061918	2983	GUCY1B3	4	155758992	155807591	1	protein_coding	guanylate cyclase 1 soluble subunit beta [Source:HGNC Symbol;Acc:HGNC:4687]	NA	NA	NA	ENSG00000061918
ENSG00000061936	ENSG00000061936	1310.03	0.296713	0.173347	1.71167	0.0869574	0.216281	ENSG00000061936	6433	SFSWAP	12	131711081	131799737	1	protein_coding	splicing factor SWAP homolog [Source:HGNC Symbol;Acc:HGNC:10790]	mRNA splicing factor(PC00148)	NA	NA	ENSG00000061936
ENSG00000061938	ENSG00000061938	886.327	0.0278094	0.134234	0.20717	0.835877	0.912661	ENSG00000061938	10188	TNK2	3	195863364	195911945	-1	protein_coding	tyrosine kinase non receptor 2 [Source:HGNC Symbol;Acc:HGNC:19297]	NA	NA	NA	ENSG00000061938
ENSG00000061987	ENSG00000061987	1386.59	0.733465	0.249151	2.94386	0.00324146	0.0184434	ENSG00000061987	23041	MON2	12	62466817	62600479	1	protein_coding	MON2 homolog, regulator of endosome-to-Golgi trafficking [Source:HGNC Symbol;Acc:HGNC:29177]	NA	NA	NA	ENSG00000061987
ENSG00000062038	ENSG00000062038	14.5847	0.788618	0.534741	1.47477	0.140276	0.301161	ENSG00000062038	1001	CDH3	16	68636189	68722616	1	protein_coding	cadherin 3 [Source:HGNC Symbol;Acc:HGNC:1762]	NA	NA	NA	ENSG00000062038
ENSG00000062096	ENSG00000062096	0.881434	-2.47915	1.53801	-1.61192	0.106979	NA	ENSG00000062096	416	ARSF	X	3041471	3112726	1	protein_coding	arylsulfatase F [Source:HGNC Symbol;Acc:HGNC:721]	hydrolase(PC00121)	NA	NA	ENSG00000062096
ENSG00000062194	ENSG00000062194	2394.02	0.0695709	0.154523	0.450228	0.652546	0.797002	ENSG00000062194	65056	GPBP1	5	57173948	57264679	1	protein_coding	GC-rich promoter binding protein 1 [Source:HGNC Symbol;Acc:HGNC:29520]	NA	NA	NA	ENSG00000062194
ENSG00000062282	ENSG00000062282	350.133	1.32268	0.243373	5.43479	5.48622e-08	1.57425e-06	ENSG00000062282	84649	DGAT2	11	75759512	75801535	1	protein_coding	diacylglycerol O-acyltransferase 2 [Source:HGNC Symbol;Acc:HGNC:16940]	acyltransferase(PC00042)	NA	NA	ENSG00000062282
ENSG00000062370	ENSG00000062370	169.038	0.254861	0.192436	1.3244	0.185371	0.363317	ENSG00000062370	7771	ZNF112	19	44326555	44367217	-1	protein_coding	zinc finger protein 112 [Source:HGNC Symbol;Acc:HGNC:12892]	KRAB box transcription factor(PC00029)	NA	NA	ENSG00000062370
ENSG00000062485	ENSG00000062485	5923.09	0.00102114	0.167179	0.00610804	0.995127	0.997983	ENSG00000062485	1431	CS	12	56271699	56300392	-1	protein_coding	citrate synthase [Source:HGNC Symbol;Acc:HGNC:2422]	lyase(PC00144)	transferase(PC00220)	NA	ENSG00000062485
ENSG00000062524	ENSG00000062524	23.3484	0.405944	0.401663	1.01066	0.31218	0.510452	ENSG00000062524	4058	LTK	15	41503638	41513887	-1	protein_coding	leukocyte receptor tyrosine kinase [Source:HGNC Symbol;Acc:HGNC:6721]	NA	NA	NA	ENSG00000062524
ENSG00000062582	ENSG00000062582	1700.43	0.268781	0.126713	2.12118	0.0339069	0.111058	ENSG00000062582	64951	MRPS24	7	43866558	43869893	-1	protein_coding	mitochondrial ribosomal protein S24 [Source:HGNC Symbol;Acc:HGNC:14510]	ribosomal protein(PC00202)	NA	NA	ENSG00000062582
ENSG00000062598	ENSG00000062598	1663.98	0.152298	0.117876	1.29202	0.196351	0.378161	ENSG00000062598	63916	ELMO2	20	46366049	46432985	-1	protein_coding	engulfment and cell motility 2 [Source:HGNC Symbol;Acc:HGNC:17233]	signaling molecule(PC00207)	NA	NA	ENSG00000062598
ENSG00000062650	ENSG00000062650	3206.36	-0.0248148	0.1473	-0.168465	0.866217	0.929647	ENSG00000062650	23063	WAPL	10	86435256	86521815	-1	protein_coding	WAPL cohesin release factor [Source:HGNC Symbol;Acc:HGNC:23293]	NA	NA	NA	ENSG00000062650
ENSG00000062716	ENSG00000062716	12371.4	-0.289356	0.259421	-1.11539	0.264683	0.459812	ENSG00000062716	81671	VMP1	17	59707192	59842255	1	protein_coding	vacuole membrane protein 1 [Source:HGNC Symbol;Acc:HGNC:29559]	receptor(PC00197)	signaling molecule(PC00207)	NA	ENSG00000062716
ENSG00000062725	ENSG00000062725	2124.27	-0.65147	0.236863	-2.75041	0.0059521	0.0297428	ENSG00000062725	10513	APPBP2	17	60443149	60526219	-1	protein_coding	amyloid beta precursor protein binding protein 2 [Source:HGNC Symbol;Acc:HGNC:622]	NA	NA	NA	ENSG00000062725
ENSG00000062822	ENSG00000062822	1854	0.109745	0.32266	0.340126	0.733762	0.85109	ENSG00000062822	5424	POLD1	19	50384204	50418018	1	protein_coding	DNA polymerase delta 1, catalytic subunit [Source:HGNC Symbol;Acc:HGNC:9175]	NA	NA	NA	ENSG00000062822
ENSG00000063015	ENSG00000063015	0.882456	2.34269	2.16294	1.0831	0.278762	NA	ENSG00000063015	124925	SEZ6	17	28954901	29006440	-1	protein_coding	seizure related 6 homolog [Source:HGNC Symbol;Acc:HGNC:15955]	NA	NA	NA	ENSG00000063015
ENSG00000063046	ENSG00000063046	16995.8	-0.37862	0.350562	-1.08004	0.280126	0.477962	ENSG00000063046	1975	EIF4B	12	53006158	53042209	1	protein_coding	eukaryotic translation initiation factor 4B [Source:HGNC Symbol;Acc:HGNC:3285]	translation initiation factor(PC00224)	NA	NA	ENSG00000063046
ENSG00000063127	ENSG00000063127	275.848	-0.0249269	0.438939	-0.056789	0.954713	0.977768	ENSG00000063127	28968	SLC6A16	19	49289638	49325225	-1	protein_coding	solute carrier family 6 member 16 [Source:HGNC Symbol;Acc:HGNC:13622]	cation transporter(PC00068)	NA	NA	ENSG00000063127
ENSG00000063169	ENSG00000063169	327.941	-0.256848	0.171956	-1.49369	0.135257	0.293938	ENSG00000063169	29998	BICRA	19	47608196	47703277	1	protein_coding	BRD4 interacting chromatin remodeling complex associated protein [Source:HGNC Symbol;Acc:HGNC:4332]	NA	NA	NA	ENSG00000063169
ENSG00000063176	ENSG00000063176	193.681	-0.0209611	0.30363	-0.0690351	0.944962	0.972802	ENSG00000063176	56848	SPHK2	19	48619291	48630717	1	protein_coding	sphingosine kinase 2 [Source:HGNC Symbol;Acc:HGNC:18859]	NA	NA	NA	ENSG00000063176
ENSG00000063177	ENSG00000063177	9337.18	-0.0292726	0.134573	-0.217522	0.827801	0.908785	ENSG00000063177	6141	RPL18	19	48615328	48619536	-1	protein_coding	ribosomal protein L18 [Source:HGNC Symbol;Acc:HGNC:10310]	ribosomal protein(PC00202)	NA	NA	ENSG00000063177
ENSG00000063180	ENSG00000063180	910.99	-0.424178	0.247854	-1.7114	0.0870065	0.216361	ENSG00000063180	770	CA11	19	48637942	48646312	-1	protein_coding	carbonic anhydrase 11 [Source:HGNC Symbol;Acc:HGNC:1370]	NA	NA	NA	ENSG00000063180
ENSG00000063241	ENSG00000063241	674.518	-0.314155	0.177708	-1.76782	0.0770913	0.19923	ENSG00000063241	79763	ISOC2	19	55452985	55462343	-1	protein_coding	isochorismatase domain containing 2 [Source:HGNC Symbol;Acc:HGNC:26278]	NA	NA	NA	ENSG00000063241
ENSG00000063244	ENSG00000063244	4383.01	0.00214151	0.173173	0.0123663	0.990133	0.995665	ENSG00000063244	11338	U2AF2	19	55654146	55674715	1	protein_coding	U2 small nuclear RNA auxiliary factor 2 [Source:HGNC Symbol;Acc:HGNC:23156]	NA	NA	NA	ENSG00000063244
ENSG00000063245	ENSG00000063245	1854.38	-0.73485	0.254647	-2.88576	0.00390465	0.0213611	ENSG00000063245	29924	EPN1	19	55675226	55709858	1	protein_coding	epsin 1 [Source:HGNC Symbol;Acc:HGNC:21604]	NA	NA	NA	ENSG00000063245
ENSG00000063322	ENSG00000063322	1033.07	-0.57139	0.223522	-2.5563	0.0105792	0.0462383	ENSG00000063322	55588	MED29	19	39391303	39400637	1	protein_coding	mediator complex subunit 29 [Source:HGNC Symbol;Acc:HGNC:23074]	NA	NA	NA	ENSG00000063322
ENSG00000063438	ENSG00000063438	248.578	-0.70938	0.197453	-3.59266	0.00032732	0.00293012	ENSG00000063438	57491	AHRR	5	304176	438291	1	protein_coding	aryl-hydrocarbon receptor repressor [Source:HGNC Symbol;Acc:HGNC:346]	basic helix-loop-helix transcription factor(PC00055)	receptor(PC00197)	NA	ENSG00000063438
ENSG00000063515	ENSG00000063515	0.405654	2.08982	3.32488	0.62854	0.52965	NA	ENSG00000063515	2928	GSC2	22	19148576	19150283	-1	protein_coding	goosecoid homeobox 2 [Source:HGNC Symbol;Acc:HGNC:4613]	NA	NA	NA	ENSG00000063515
ENSG00000063587	ENSG00000063587	834.863	0.118181	0.114602	1.03123	0.302435	0.501107	ENSG00000063587	10838	ZNF275	X	153334155	153360110	1	protein_coding	zinc finger protein 275 [Source:HGNC Symbol;Acc:HGNC:13069]	NA	NA	NA	ENSG00000063587
ENSG00000063601	ENSG00000063601	683.786	-0.211765	0.153933	-1.37569	0.168916	0.341826	ENSG00000063601	8776	MTMR1	X	150692971	150765103	1	protein_coding	myotubularin related protein 1 [Source:HGNC Symbol;Acc:HGNC:7449]	phosphatase(PC00181)	NA	NA	ENSG00000063601
ENSG00000063660	ENSG00000063660	9853.05	-0.974717	0.215273	-4.52782	5.95964e-06	9.82777e-05	ENSG00000063660	2817	GPC1	2	240435671	240468078	1	protein_coding	glypican 1 [Source:HGNC Symbol;Acc:HGNC:4449]	NA	NA	NA	ENSG00000063660
ENSG00000063761	ENSG00000063761	136.348	-0.138643	0.160886	-0.861744	0.388828	0.586596	ENSG00000063761	57143	ADCK1	14	77800083	77935012	1	protein_coding	aarF domain containing kinase 1 [Source:HGNC Symbol;Acc:HGNC:19038]	serine protease(PC00203)	NA	NA	ENSG00000063761
ENSG00000063854	ENSG00000063854	561.316	-0.00820606	0.201899	-0.0406443	0.967579	0.984362	ENSG00000063854	3029	HAGH	16	1795620	1827194	-1	protein_coding	hydroxyacylglutathione hydrolase [Source:HGNC Symbol;Acc:HGNC:4805]	NA	NA	NA	ENSG00000063854
ENSG00000063978	ENSG00000063978	1018.64	-0.416697	0.227763	-1.82952	0.0673222	0.181614	ENSG00000063978	6047	RNF4	4	2462220	2625320	1	protein_coding	ring finger protein 4 [Source:HGNC Symbol;Acc:HGNC:10067]	NA	NA	NA	ENSG00000063978
ENSG00000064012	ENSG00000064012	918.987	-0.0695316	0.133949	-0.519089	0.603699	0.762275	ENSG00000064012	841	CASP8	2	201233443	201287711	1	protein_coding	caspase 8 [Source:HGNC Symbol;Acc:HGNC:1509]	cysteine protease(PC00081)	protease inhibitor(PC00191)	NA	ENSG00000064012
ENSG00000064042	ENSG00000064042	2356.25	-0.423738	0.224504	-1.88744	0.0591013	0.166157	ENSG00000064042	22998	LIMCH1	4	41359607	41700044	1	protein_coding	LIM and calponin homology domains 1 [Source:HGNC Symbol;Acc:HGNC:29191]	actin family cytoskeletal protein(PC00041)	NA	NA	ENSG00000064042
ENSG00000064102	ENSG00000064102	1076.01	0.511168	0.151458	3.37499	0.00073819	0.00565327	ENSG00000064102	55726	INTS13	12	26905181	26938326	-1	protein_coding	integrator complex subunit 13 [Source:HGNC Symbol;Acc:HGNC:20174]	NA	NA	NA	ENSG00000064102
ENSG00000064115	ENSG00000064115	5125.07	-0.121574	0.248336	-0.489556	0.624448	0.777829	ENSG00000064115	51768	TM7SF3	12	26973195	27014434	-1	protein_coding	transmembrane 7 superfamily member 3 [Source:HGNC Symbol;Acc:HGNC:23049]	NA	NA	NA	ENSG00000064115
ENSG00000064195	ENSG00000064195	25.4158	-0.054166	0.370303	-0.146275	0.883705	0.940002	ENSG00000064195	1747	DLX3	17	49990005	49995224	-1	protein_coding	distal-less homeobox 3 [Source:HGNC Symbol;Acc:HGNC:2916]	DNA binding protein(PC00009)	homeodomain transcription factor(PC00119)	NA	ENSG00000064195
ENSG00000064199	ENSG00000064199	454.016	0.329118	0.15878	2.07279	0.038192	0.121162	ENSG00000064199	53340	SPA17	11	124673798	124697518	1	protein_coding	sperm autoantigenic protein 17 [Source:HGNC Symbol;Acc:HGNC:11210]	NA	NA	NA	ENSG00000064199
ENSG00000064201	ENSG00000064201	3.72788	5.00519	1.89458	2.64185	0.00824554	0.0380309	ENSG00000064201	10077	TSPAN32	11	2301997	2318200	1	protein_coding	tetraspanin 32 [Source:HGNC Symbol;Acc:HGNC:13410]	NA	NA	NA	ENSG00000064201
ENSG00000064205	ENSG00000064205	9.89779	2.00666	0.744825	2.69414	0.0070571	0.0339687	ENSG00000064205	8839	WISP2	20	44714844	44728509	1	protein_coding	WNT1 inducible signaling pathway protein 2 [Source:HGNC Symbol;Acc:HGNC:12770]	growth factor(PC00112)	NA	NA	ENSG00000064205
ENSG00000064218	ENSG00000064218	10.7648	-0.661679	0.485109	-1.36398	0.172574	0.345886	ENSG00000064218	58524	DMRT3	9	976964	991731	1	protein_coding	doublesex and mab-3 related transcription factor 3 [Source:HGNC Symbol;Acc:HGNC:13909]	NA	NA	NA	ENSG00000064218
ENSG00000064225	ENSG00000064225	155.194	1.35739	0.30497	4.4509	8.55098e-06	0.000135529	ENSG00000064225	10402	ST3GAL6	3	98732236	98821201	1	protein_coding	ST3 beta-galactoside alpha-2,3-sialyltransferase 6 [Source:HGNC Symbol;Acc:HGNC:18080]	NA	NA	NA	ENSG00000064225
ENSG00000064270	ENSG00000064270	2.64338	1.56292	1.04712	1.49259	0.135545	0.294212	ENSG00000064270	9914	ATP2C2	16	84368527	84464187	1	protein_coding	ATPase secretory pathway Ca2+ transporting 2 [Source:HGNC Symbol;Acc:HGNC:29103]	cation transporter(PC00068)	hydrolase(PC00121)	ion channel(PC00133)	ENSG00000064270
ENSG00000064300	ENSG00000064300	325.745	-0.175606	0.904847	-0.194073	NA	NA	ENSG00000064300	4804	NGFR	17	49495293	49515017	1	protein_coding	nerve growth factor receptor [Source:HGNC Symbol;Acc:HGNC:7809]	tumor necrosis factor receptor(PC00230)	NA	NA	ENSG00000064300
ENSG00000064309	ENSG00000064309	448.891	-0.179812	0.297467	-0.604477	0.545527	0.719063	ENSG00000064309	50937	CDON	11	125955796	126063335	-1	protein_coding	cell adhesion associated, oncogene regulated [Source:HGNC Symbol;Acc:HGNC:17104]	NA	NA	NA	ENSG00000064309
ENSG00000064313	ENSG00000064313	2354.3	0.0444736	0.128164	0.347006	0.728586	0.848026	ENSG00000064313	6873	TAF2	8	119730775	119832863	-1	protein_coding	TATA-box binding protein associated factor 2 [Source:HGNC Symbol;Acc:HGNC:11536]	metalloprotease(PC00153)	transcription factor(PC00218)	NA	ENSG00000064313
ENSG00000064393	ENSG00000064393	1667.74	-0.359587	0.393893	-0.912907	0.361292	0.559528	ENSG00000064393	28996	HIPK2	7	139561570	139777778	-1	protein_coding	homeodomain interacting protein kinase 2 [Source:HGNC Symbol;Acc:HGNC:14402]	non-receptor serine/threonine protein kinase(PC00167)	non-receptor tyrosine protein kinase(PC00168)	NA	ENSG00000064393
ENSG00000064419	ENSG00000064419	1363.62	-0.05972	0.131344	-0.454685	0.649336	0.795426	ENSG00000064419	23534	TNPO3	7	128954180	129055173	-1	protein_coding	transportin 3 [Source:HGNC Symbol;Acc:HGNC:17103]	transporter(PC00227)	NA	NA	ENSG00000064419
ENSG00000064489	ENSG00000064489	62.2748	-0.208953	0.670533	-0.311623	0.755327	0.864557	ENSG00000064489	4207	BORCS8-MEF2B	19	19145567	19192158	-1	protein_coding	BORCS8-MEF2B readthrough [Source:HGNC Symbol;Acc:HGNC:39979]	MADS box transcription factor(PC00250)	NA	NA	ENSG00000064489
ENSG00000064490	ENSG00000064490	435.468	-0.0295459	0.156828	-0.188397	0.850565	0.920819	ENSG00000064490	8625	RFXANK	19	19192229	19201869	1	protein_coding	regulatory factor X associated ankyrin containing protein [Source:HGNC Symbol;Acc:HGNC:9987]	transcription factor(PC00218)	NA	NA	ENSG00000064490
ENSG00000064545	ENSG00000064545	235.402	0.954159	0.311027	3.06777	0.00215662	0.0132683	ENSG00000064545	54929	TMEM161A	19	19119169	19138513	-1	protein_coding	transmembrane protein 161A [Source:HGNC Symbol;Acc:HGNC:26020]	NA	NA	NA	ENSG00000064545
ENSG00000064547	ENSG00000064547	146.953	1.42112	0.472244	3.0093	0.00261853	0.0155318	ENSG00000064547	9170	LPAR2	19	19623668	19628930	-1	protein_coding	lysophosphatidic acid receptor 2 [Source:HGNC Symbol;Acc:HGNC:3168]	G-protein coupled receptor(PC00021)	NA	NA	ENSG00000064547
ENSG00000064601	ENSG00000064601	4065.89	0.790471	0.16024	4.93304	8.09577e-07	1.69562e-05	ENSG00000064601	5476	CTSA	20	45890144	45898820	1	protein_coding	cathepsin A [Source:HGNC Symbol;Acc:HGNC:9251]	serine protease(PC00203)	NA	NA	ENSG00000064601
ENSG00000064607	ENSG00000064607	2536.71	0.343758	0.17678	1.94456	0.0518286	0.150993	ENSG00000064607	10147	SUGP2	19	18990888	19034023	-1	protein_coding	SURP and G-patch domain containing 2 [Source:HGNC Symbol;Acc:HGNC:18641]	mRNA splicing factor(PC00148)	NA	NA	ENSG00000064607
ENSG00000064651	ENSG00000064651	1399.35	-0.388618	0.0961364	-4.04237	5.29147e-05	0.000645912	ENSG00000064651	6558	SLC12A2	5	128083766	128189688	1	protein_coding	solute carrier family 12 member 2 [Source:HGNC Symbol;Acc:HGNC:10911]	NA	NA	NA	ENSG00000064651
ENSG00000064652	ENSG00000064652	640.979	-0.456478	0.174388	-2.6176	0.00885503	0.0402545	ENSG00000064652	28966	SNX24	5	122843439	123029354	1	protein_coding	sorting nexin 24 [Source:HGNC Symbol;Acc:HGNC:21533]	NA	NA	NA	ENSG00000064652
ENSG00000064655	ENSG00000064655	127.815	-1.19156	0.491148	-2.42607	0.0152632	0.0612564	ENSG00000064655	2139	EYA2	20	46894624	47188844	1	protein_coding	EYA transcriptional coactivator and phosphatase 2 [Source:HGNC Symbol;Acc:HGNC:3520]	NA	NA	NA	ENSG00000064655
ENSG00000064666	ENSG00000064666	3405.1	0.0339161	0.150677	0.225092	0.821908	0.905916	ENSG00000064666	1265	CNN2	19	1026581	1039068	1	protein_coding	calponin 2 [Source:HGNC Symbol;Acc:HGNC:2156]	non-motor actin binding protein(PC00165)	NA	NA	ENSG00000064666
ENSG00000064687	ENSG00000064687	240.209	1.17727	0.428325	2.74854	0.00598619	0.0298896	ENSG00000064687	10347	ABCA7	19	1040101	1065572	1	protein_coding	ATP binding cassette subfamily A member 7 [Source:HGNC Symbol;Acc:HGNC:37]	ATP-binding cassette (ABC) transporter(PC00003)	NA	NA	ENSG00000064687
ENSG00000064692	ENSG00000064692	21.8256	-2.03728	0.693154	-2.93914	0.00329121	0.0186719	ENSG00000064692	9627	SNCAIP	5	122311354	122464219	1	protein_coding	synuclein alpha interacting protein [Source:HGNC Symbol;Acc:HGNC:11139]	NA	NA	NA	ENSG00000064692
ENSG00000064703	ENSG00000064703	1094.73	0.0799956	0.203175	0.393728	0.693782	0.824812	ENSG00000064703	11218	DDX20	1	111755245	111768016	1	protein_coding	DEAD-box helicase 20 [Source:HGNC Symbol;Acc:HGNC:2743]	NA	NA	NA	ENSG00000064703
ENSG00000064726	ENSG00000064726	2076.7	-0.29288	0.210822	-1.38923	0.164764	0.336366	ENSG00000064726	53339	BTBD1	15	83016422	83067354	-1	protein_coding	BTB domain containing 1 [Source:HGNC Symbol;Acc:HGNC:1120]	DNA topoisomerase(PC00017)	NA	NA	ENSG00000064726
ENSG00000064763	ENSG00000064763	87.2207	-0.235137	0.311362	-0.755187	0.450137	0.639918	ENSG00000064763	55711	FAR2	12	29149103	29340980	1	protein_coding	fatty acyl-CoA reductase 2 [Source:HGNC Symbol;Acc:HGNC:25531]	NA	NA	NA	ENSG00000064763
ENSG00000064787	ENSG00000064787	4.7241	0.967589	0.893878	1.08246	0.279047	0.476675	ENSG00000064787	8537	BCAS1	20	53936777	54070594	-1	protein_coding	breast carcinoma amplified sequence 1 [Source:HGNC Symbol;Acc:HGNC:974]	NA	NA	NA	ENSG00000064787
ENSG00000064835	ENSG00000064835	0	NA	NA	NA	NA	NA	ENSG00000064835	5449	POU1F1	3	87259404	87276587	-1	protein_coding	POU class 1 homeobox 1 [Source:HGNC Symbol;Acc:HGNC:9210]	NA	NA	NA	ENSG00000064835
ENSG00000064886	ENSG00000064886	29.8443	-0.659702	0.359576	-1.83467	0.0665549	0.180102	ENSG00000064886	1117	CHI3L2	1	111200771	111243440	1	protein_coding	chitinase 3 like 2 [Source:HGNC Symbol;Acc:HGNC:1933]	NA	NA	NA	ENSG00000064886
ENSG00000064932	ENSG00000064932	743.205	0.723006	0.171138	4.22469	2.39272e-05	0.00032243	ENSG00000064932	22904	SBNO2	19	1107636	1174283	-1	protein_coding	strawberry notch homolog 2 [Source:HGNC Symbol;Acc:HGNC:29158]	helicase(PC00115)	nuclease(PC00170)	NA	ENSG00000064932
ENSG00000064933	ENSG00000064933	631.696	0.424092	0.259872	1.63193	0.102695	0.243357	ENSG00000064933	5378	PMS1	2	189784085	189877629	1	protein_coding	PMS1 homolog 1, mismatch repair system component [Source:HGNC Symbol;Acc:HGNC:9121]	DNA binding protein(PC00009)	NA	NA	ENSG00000064933
ENSG00000064961	ENSG00000064961	2148.71	0.129886	0.161671	0.803399	0.421744	0.615785	ENSG00000064961	10362	HMG20B	19	3572777	3579088	1	protein_coding	high mobility group 20B [Source:HGNC Symbol;Acc:HGNC:5002]	NA	NA	NA	ENSG00000064961
ENSG00000064989	ENSG00000064989	22.2947	-1.03258	0.551495	-1.87233	0.0611612	0.170019	ENSG00000064989	10203	CALCRL	2	187343129	187448460	-1	protein_coding	calcitonin receptor like receptor [Source:HGNC Symbol;Acc:HGNC:16709]	NA	NA	NA	ENSG00000064989
ENSG00000064995	ENSG00000064995	1253.39	0.725564	0.133081	5.45205	4.97936e-08	1.44025e-06	ENSG00000064995	6882	TAF11	6	34877778	34888089	-1	protein_coding	TATA-box binding protein associated factor 11 [Source:HGNC Symbol;Acc:HGNC:11544]	transcription factor(PC00218)	NA	NA	ENSG00000064995
ENSG00000064999	ENSG00000064999	1202.24	0.584683	0.269518	2.16937	0.0300547	0.101752	ENSG00000064999	23294	ANKS1A	6	34889265	35091413	1	protein_coding	ankyrin repeat and sterile alpha motif domain containing 1A [Source:HGNC Symbol;Acc:HGNC:20961]	transmembrane receptor regulatory/adaptor protein(PC00226)	NA	NA	ENSG00000064999
ENSG00000065000	ENSG00000065000	2351.74	0.0811065	0.117369	0.691041	0.48954	0.672512	ENSG00000065000	8943	AP3D1	19	2100988	2164465	-1	protein_coding	adaptor related protein complex 3 delta 1 subunit [Source:HGNC Symbol;Acc:HGNC:568]	transporter(PC00227)	NA	NA	ENSG00000065000
ENSG00000065029	ENSG00000065029	598.095	0.814537	0.19227	4.23643	2.27099e-05	0.000309325	ENSG00000065029	7629	ZNF76	6	35258909	35295985	1	protein_coding	zinc finger protein 76 [Source:HGNC Symbol;Acc:HGNC:13149]	NA	NA	NA	ENSG00000065029
ENSG00000065054	ENSG00000065054	413.711	0.208144	0.19516	1.06653	0.286184	0.484123	ENSG00000065054	9351	SLC9A3R2	16	2025356	2039026	1	protein_coding	SLC9A3 regulator 2 [Source:HGNC Symbol;Acc:HGNC:11076]	NA	NA	NA	ENSG00000065054
ENSG00000065057	ENSG00000065057	215.814	0.129832	0.136186	0.953342	0.340417	0.539038	ENSG00000065057	4913	NTHL1	16	2039815	2047866	-1	protein_coding	nth like DNA glycosylase 1 [Source:HGNC Symbol;Acc:HGNC:8028]	DNA glycosylase(PC00010)	endodeoxyribonuclease(PC00093)	glycosidase(PC00110)	ENSG00000065057
ENSG00000065060	ENSG00000065060	1931.25	0.688954	0.239209	2.88013	0.00397512	0.0216902	ENSG00000065060	54887	UHRF1BP1	6	34792015	34883138	1	protein_coding	UHRF1 binding protein 1 [Source:HGNC Symbol;Acc:HGNC:21216]	NA	NA	NA	ENSG00000065060
ENSG00000065135	ENSG00000065135	4516.63	-0.295351	0.20729	-1.42482	0.15421	0.321598	ENSG00000065135	2773	GNAI3	1	109548611	109618321	1	protein_coding	G protein subunit alpha i3 [Source:HGNC Symbol;Acc:HGNC:4387]	heterotrimeric G-protein(PC00117)	NA	NA	ENSG00000065135
ENSG00000065150	ENSG00000065150	4351.66	-0.189277	0.186444	-1.01519	0.310014	0.508708	ENSG00000065150	3843	IPO5	13	97953658	98024297	1	protein_coding	importin 5 [Source:HGNC Symbol;Acc:HGNC:6402]	G-protein modulator(PC00022)	transfer/carrier protein(PC00219)	transporter(PC00227)	ENSG00000065150
ENSG00000065154	ENSG00000065154	4274.14	-0.998225	0.163399	-6.10912	1.00184e-09	4.23522e-08	ENSG00000065154	4942	OAT	10	124397303	124418976	-1	protein_coding	ornithine aminotransferase [Source:HGNC Symbol;Acc:HGNC:8091]	transaminase(PC00216)	NA	NA	ENSG00000065154
ENSG00000065183	ENSG00000065183	2497.26	0.378008	0.311868	1.21208	0.225483	0.413929	ENSG00000065183	10885	WDR3	1	117929720	117966542	1	protein_coding	WD repeat domain 3 [Source:HGNC Symbol;Acc:HGNC:12755]	NA	NA	NA	ENSG00000065183
ENSG00000065243	ENSG00000065243	2099.29	-0.189061	0.115993	-1.62994	0.103114	0.244176	ENSG00000065243	5586	PKN2	1	88684222	88836255	1	protein_coding	protein kinase N2 [Source:HGNC Symbol;Acc:HGNC:9406]	annexin(PC00050)	calmodulin(PC00061)	non-receptor serine/threonine protein kinase(PC00167)	ENSG00000065243
ENSG00000065268	ENSG00000065268	488.895	0.121632	0.227706	0.534161	0.59323	0.754218	ENSG00000065268	57418	WDR18	19	984271	998438	1	protein_coding	WD repeat domain 18 [Source:HGNC Symbol;Acc:HGNC:17956]	NA	NA	NA	ENSG00000065268
ENSG00000065308	ENSG00000065308	2226.89	-0.258333	0.218209	-1.18388	0.23646	0.427488	ENSG00000065308	9697	TRAM2	6	52497402	52576915	-1	protein_coding	translocation associated membrane protein 2 [Source:HGNC Symbol;Acc:HGNC:16855]	NA	NA	NA	ENSG00000065308
ENSG00000065320	ENSG00000065320	909.314	0.199314	0.09832	2.0272	0.0426422	0.131191	ENSG00000065320	9423	NTN1	17	9021542	9244000	1	protein_coding	netrin 1 [Source:HGNC Symbol;Acc:HGNC:8029]	extracellular matrix linker protein(PC00101)	protease inhibitor(PC00191)	receptor(PC00197)	ENSG00000065320
ENSG00000065325	ENSG00000065325	338.974	0.610072	0.324549	1.87975	0.0601422	0.168148	ENSG00000065325	9340	GLP2R	17	9822206	9892102	1	protein_coding	glucagon like peptide 2 receptor [Source:HGNC Symbol;Acc:HGNC:4325]	NA	NA	NA	ENSG00000065325
ENSG00000065328	ENSG00000065328	1430.69	-0.447734	0.34751	-1.2884	0.197605	0.379742	ENSG00000065328	55388	MCM10	10	13161554	13211104	1	protein_coding	minichromosome maintenance 10 replication initiation factor [Source:HGNC Symbol;Acc:HGNC:18043]	NA	NA	NA	ENSG00000065328
ENSG00000065357	ENSG00000065357	1198.15	1.43263	0.299548	4.78265	1.73003e-06	3.29579e-05	ENSG00000065357	1606	DGKA	12	55927319	55954027	1	protein_coding	diacylglycerol kinase alpha [Source:HGNC Symbol;Acc:HGNC:2849]	kinase(PC00137)	NA	NA	ENSG00000065357
ENSG00000065361	ENSG00000065361	191.566	-0.549795	0.378251	-1.45352	0.14608	0.310146	ENSG00000065361	2065	ERBB3	12	56079857	56103505	1	protein_coding	erb-b2 receptor tyrosine kinase 3 [Source:HGNC Symbol;Acc:HGNC:3431]	NA	NA	NA	ENSG00000065361
ENSG00000065371	ENSG00000065371	0.833021	-2.28811	1.81359	-1.26165	0.207076	NA	ENSG00000065371	54763	ROPN1	3	123968521	123992178	-1	protein_coding	rhophilin associated tail protein 1 [Source:HGNC Symbol;Acc:HGNC:17692]	NA	NA	NA	ENSG00000065371
ENSG00000065413	ENSG00000065413	274.002	-0.895641	0.326494	-2.74321	0.00608416	0.030289	ENSG00000065413	91526	ANKRD44	2	196967017	197311173	-1	protein_coding	ankyrin repeat domain 44 [Source:HGNC Symbol;Acc:HGNC:25259]	NA	NA	NA	ENSG00000065413
ENSG00000065427	ENSG00000065427	4838.6	0.469428	0.128975	3.63969	0.000272971	0.00253052	ENSG00000065427	3735	KARS	16	75627474	75648643	-1	protein_coding	lysyl-tRNA synthetase [Source:HGNC Symbol;Acc:HGNC:6215]	RNA binding protein(PC00031)	aminoacyl-tRNA synthetase(PC00047)	NA	ENSG00000065427
ENSG00000065457	ENSG00000065457	606.119	-0.58586	0.175019	-3.34741	0.000815704	0.00613395	ENSG00000065457	23536	ADAT1	16	75596981	75623300	-1	protein_coding	adenosine deaminase, tRNA specific 1 [Source:HGNC Symbol;Acc:HGNC:228]	NA	NA	NA	ENSG00000065457
ENSG00000065485	ENSG00000065485	808.74	0.411666	0.2382	1.72823	0.0839462	0.211075	ENSG00000065485	10954	PDIA5	3	123067062	123225227	1	protein_coding	protein disulfide isomerase family A member 5 [Source:HGNC Symbol;Acc:HGNC:24811]	NA	NA	NA	ENSG00000065485
ENSG00000065491	ENSG00000065491	894.936	1.04641	0.144813	7.22595	4.97622e-13	3.80459e-11	ENSG00000065491	55633	TBC1D22B	6	37257772	37332970	1	protein_coding	TBC1 domain family member 22B [Source:HGNC Symbol;Acc:HGNC:21602]	G-protein modulator(PC00022)	cysteine protease(PC00081)	NA	ENSG00000065491
ENSG00000065518	ENSG00000065518	1559.26	-0.176705	0.107089	-1.65007	0.098928	0.236827	ENSG00000065518	4710	NDUFB4	3	120596309	120602500	1	protein_coding	NADH:ubiquinone oxidoreductase subunit B4 [Source:HGNC Symbol;Acc:HGNC:7699]	reductase(PC00198)	NA	NA	ENSG00000065518
ENSG00000065526	ENSG00000065526	2191.67	0.701193	0.129127	5.43026	5.62721e-08	1.60741e-06	ENSG00000065526	23013	SPEN	1	15847864	15940460	1	protein_coding	spen family transcriptional repressor [Source:HGNC Symbol;Acc:HGNC:17575]	NA	NA	NA	ENSG00000065526
ENSG00000065534	ENSG00000065534	688.755	-0.470542	0.249054	-1.88931	0.0588498	0.165652	ENSG00000065534	4638	MYLK	3	123610049	123884331	-1	protein_coding	myosin light chain kinase [Source:HGNC Symbol;Acc:HGNC:7590]	NA	NA	NA	ENSG00000065534
ENSG00000065548	ENSG00000065548	3054.16	0.330278	0.0969034	3.40832	0.000653647	0.00513909	ENSG00000065548	55854	ZC3H15	2	186486156	186509363	1	protein_coding	zinc finger CCCH-type containing 15 [Source:HGNC Symbol;Acc:HGNC:29528]	zinc finger transcription factor(PC00244)	NA	NA	ENSG00000065548
ENSG00000065559	ENSG00000065559	1069.48	-0.034759	0.220168	-0.157875	0.874555	0.934436	ENSG00000065559	6416	MAP2K4	17	12020824	12143830	1	protein_coding	mitogen-activated protein kinase kinase 4 [Source:HGNC Symbol;Acc:HGNC:6844]	NA	NA	NA	ENSG00000065559
ENSG00000065600	ENSG00000065600	393.894	0.759457	0.213031	3.565	0.000363852	0.00318606	ENSG00000065600	55248	TMEM206	1	212363931	212414901	-1	protein_coding	transmembrane protein 206 [Source:HGNC Symbol;Acc:HGNC:25593]	NA	NA	NA	ENSG00000065600
ENSG00000065609	ENSG00000065609	50.5062	-0.218894	0.554787	-0.394556	0.693171	0.824357	ENSG00000065609	9892	SNAP91	6	83552880	83709691	-1	protein_coding	synaptosome associated protein 91 [Source:HGNC Symbol;Acc:HGNC:14986]	vesicle coat protein(PC00235)	NA	NA	ENSG00000065609
ENSG00000065613	ENSG00000065613	2268.62	-0.414001	0.302667	-1.36784	0.171362	0.344607	ENSG00000065613	9748	SLK	10	103967201	104029233	1	protein_coding	STE20 like kinase [Source:HGNC Symbol;Acc:HGNC:11088]	NA	NA	NA	ENSG00000065613
ENSG00000065615	ENSG00000065615	614.882	-0.149495	0.308648	-0.484354	0.628135	0.78023	ENSG00000065615	51167	CYB5R4	6	83859643	83967424	1	protein_coding	cytochrome b5 reductase 4 [Source:HGNC Symbol;Acc:HGNC:20147]	NA	NA	NA	ENSG00000065615
ENSG00000065618	ENSG00000065618	333.966	2.19365	0.242209	9.05684	1.34285e-19	2.53338e-17	ENSG00000065618	1308	COL17A1	10	104031286	104086002	-1	protein_coding	collagen type XVII alpha 1 chain [Source:HGNC Symbol;Acc:HGNC:2194]	NA	NA	NA	ENSG00000065618
ENSG00000065621	ENSG00000065621	412.562	-1.10292	0.209515	-5.26413	1.40856e-07	3.61874e-06	ENSG00000065621	119391	GSTO2	10	104268873	104304945	1	protein_coding	glutathione S-transferase omega 2 [Source:HGNC Symbol;Acc:HGNC:23064]	NA	NA	NA	ENSG00000065621
ENSG00000065665	ENSG00000065665	632.816	1.05772	0.245836	4.30255	1.6884e-05	0.000240061	ENSG00000065665	55176	SEC61A2	10	12129637	12169961	1	protein_coding	Sec61 translocon alpha 2 subunit [Source:HGNC Symbol;Acc:HGNC:17702]	membrane traffic protein(PC00150)	transporter(PC00227)	NA	ENSG00000065665
ENSG00000065675	ENSG00000065675	299.053	-0.346524	0.151783	-2.28302	0.0224289	0.0821982	ENSG00000065675	5588	PRKCQ	10	6427143	6580301	-1	protein_coding	protein kinase C theta [Source:HGNC Symbol;Acc:HGNC:9410]	annexin(PC00050)	calmodulin(PC00061)	non-receptor serine/threonine protein kinase(PC00167)	ENSG00000065675
ENSG00000065717	ENSG00000065717	652.263	0.0688369	0.427067	0.161185	0.871948	0.933307	ENSG00000065717	7089	TLE2	19	2997638	3047635	-1	protein_coding	transducin like enhancer of split 2 [Source:HGNC Symbol;Acc:HGNC:11838]	transcription cofactor(PC00217)	NA	NA	ENSG00000065717
ENSG00000065802	ENSG00000065802	1243.9	0.169075	0.154579	1.09378	0.27405	0.470716	ENSG00000065802	51665	ASB1	2	238426742	238452250	1	protein_coding	ankyrin repeat and SOCS box containing 1 [Source:HGNC Symbol;Acc:HGNC:16011]	NA	NA	NA	ENSG00000065802
ENSG00000065809	ENSG00000065809	964.034	-0.0771762	0.308432	-0.250221	0.802417	0.894562	ENSG00000065809	83641	FAM107B	10	14518557	14774897	-1	protein_coding	family with sequence similarity 107 member B [Source:HGNC Symbol;Acc:HGNC:23726]	NA	NA	NA	ENSG00000065809
ENSG00000065833	ENSG00000065833	738.953	0.41564	0.139454	2.98048	0.00287797	0.0167938	ENSG00000065833	4199	ME1	6	83210389	83431071	-1	protein_coding	malic enzyme 1 [Source:HGNC Symbol;Acc:HGNC:6983]	acyltransferase(PC00042)	decarboxylase(PC00089)	dehydrogenase(PC00092)	ENSG00000065833
ENSG00000065882	ENSG00000065882	3483.04	-0.0742694	0.124744	-0.595375	0.551593	0.723934	ENSG00000065882	23216	TBC1D1	4	37891087	38139175	1	protein_coding	TBC1 domain family member 1 [Source:HGNC Symbol;Acc:HGNC:11578]	G-protein modulator(PC00022)	cysteine protease(PC00081)	NA	ENSG00000065882
ENSG00000065883	ENSG00000065883	1942.73	0.026311	0.117794	0.223364	0.823252	0.906611	ENSG00000065883	8621	CDK13	7	39950037	40097134	1	protein_coding	cyclin dependent kinase 13 [Source:HGNC Symbol;Acc:HGNC:1733]	non-receptor serine/threonine protein kinase(PC00167)	non-receptor tyrosine protein kinase(PC00168)	NA	ENSG00000065883
ENSG00000065911	ENSG00000065911	5305.15	-0.00262889	0.167243	-0.015719	0.987459	0.9945	ENSG00000065911	10797	MTHFD2	2	74198562	74217565	1	protein_coding	methylenetetrahydrofolate dehydrogenase (NADP+ dependent) 2, methenyltetrahydrofolate cyclohydrolase [Source:HGNC Symbol;Acc:HGNC:7434]	dehydrogenase(PC00092)	hydrolase(PC00121)	NA	ENSG00000065911
ENSG00000065923	ENSG00000065923	1100.07	0.724385	0.217253	3.33429	0.000855173	0.00636783	ENSG00000065923	84679	SLC9A7	X	46599252	46759172	-1	protein_coding	solute carrier family 9 member A7 [Source:HGNC Symbol;Acc:HGNC:17123]	NA	NA	NA	ENSG00000065923
ENSG00000065970	ENSG00000065970	1684.21	-0.46275	0.290639	-1.59218	0.111344	0.257128	ENSG00000065970	55810	FOXJ2	12	8032703	8055503	1	protein_coding	forkhead box J2 [Source:HGNC Symbol;Acc:HGNC:24818]	NA	NA	NA	ENSG00000065970
ENSG00000065978	ENSG00000065978	34519.9	-0.201416	0.221746	-0.908317	0.363711	0.562189	ENSG00000065978	4904	YBX1	1	42682427	42702349	1	protein_coding	Y-box binding protein 1 [Source:HGNC Symbol;Acc:HGNC:8014]	NA	NA	NA	ENSG00000065978
ENSG00000065989	ENSG00000065989	553.925	0.0717312	0.224257	0.319862	0.749073	0.860584	ENSG00000065989	5141	PDE4A	19	10416773	10469631	1	protein_coding	phosphodiesterase 4A [Source:HGNC Symbol;Acc:HGNC:8780]	NA	NA	NA	ENSG00000065989
ENSG00000066027	ENSG00000066027	698.245	0.138427	0.333713	0.41481	0.678281	0.814605	ENSG00000066027	5525	PPP2R5A	1	212285537	212361863	1	protein_coding	protein phosphatase 2 regulatory subunit B'alpha [Source:HGNC Symbol;Acc:HGNC:9309]	protein phosphatase(PC00195)	NA	NA	ENSG00000066027
ENSG00000066032	ENSG00000066032	15.4318	1.03146	0.75026	1.3748	0.169192	0.342202	ENSG00000066032	1496	CTNNA2	2	79185231	80648861	1	protein_coding	catenin alpha 2 [Source:HGNC Symbol;Acc:HGNC:2510]	cell adhesion molecule(PC00069)	non-motor actin binding protein(PC00165)	NA	ENSG00000066032
ENSG00000066044	ENSG00000066044	1973	-0.276415	0.192795	-1.43373	0.15165	0.318098	ENSG00000066044	1994	ELAVL1	19	7958579	8005659	-1	protein_coding	ELAV like RNA binding protein 1 [Source:HGNC Symbol;Acc:HGNC:3312]	NA	NA	NA	ENSG00000066044
ENSG00000066056	ENSG00000066056	16.6433	0.0683015	0.576589	0.118458	0.905705	0.951092	ENSG00000066056	7075	TIE1	1	43300993	43323108	1	protein_coding	tyrosine kinase with immunoglobulin like and EGF like domains 1 [Source:HGNC Symbol;Acc:HGNC:11809]	NA	NA	NA	ENSG00000066056
ENSG00000066084	ENSG00000066084	1431.19	-0.38131	0.263536	-1.4469	0.147925	0.312726	ENSG00000066084	57609	DIP2B	12	50504985	50748667	1	protein_coding	disco interacting protein 2 homolog B [Source:HGNC Symbol;Acc:HGNC:29284]	NA	NA	NA	ENSG00000066084
ENSG00000066117	ENSG00000066117	2145.35	-0.50464	0.155171	-3.25215	0.00114534	0.00804505	ENSG00000066117	6602	SMARCD1	12	50084972	50100712	1	protein_coding	SWI/SNF related, matrix associated, actin dependent regulator of chromatin, subfamily d, member 1 [Source:HGNC Symbol;Acc:HGNC:11106]	chromatin/chromatin-binding protein(PC00077)	NA	NA	ENSG00000066117
ENSG00000066135	ENSG00000066135	2404.91	-0.251229	0.166341	-1.51032	0.130961	0.287658	ENSG00000066135	9682	KDM4A	1	43650158	43705515	1	protein_coding	lysine demethylase 4A [Source:HGNC Symbol;Acc:HGNC:22978]	zinc finger transcription factor(PC00244)	NA	NA	ENSG00000066135
ENSG00000066136	ENSG00000066136	1678.6	-0.100228	0.213157	-0.470207	0.638207	0.787441	ENSG00000066136	4802	NFYC	1	40691648	40771603	1	protein_coding	nuclear transcription factor Y subunit gamma [Source:HGNC Symbol;Acc:HGNC:7806]	DNA-directed DNA polymerase(PC00018)	chromatin/chromatin-binding protein(PC00077)	transcription factor(PC00218)	ENSG00000066136
ENSG00000066185	ENSG00000066185	5.64502	2.93633	1.0199	2.87903	0.00398898	0.0217471	ENSG00000066185	84217	ZMYND12	1	42430329	42456267	-1	protein_coding	zinc finger MYND-type containing 12 [Source:HGNC Symbol;Acc:HGNC:21192]	NA	NA	NA	ENSG00000066185
ENSG00000066230	ENSG00000066230	83.4086	-0.776667	0.323032	-2.4043	0.0162035	0.0641743	ENSG00000066230	6550	SLC9A3	5	473310	524332	-1	protein_coding	solute carrier family 9 member A3 [Source:HGNC Symbol;Acc:HGNC:11073]	NA	NA	NA	ENSG00000066230
ENSG00000066248	ENSG00000066248	144.673	-0.200481	0.597737	-0.3354	0.737324	0.853302	ENSG00000066248	25791	NGEF	2	232878686	233013272	-1	protein_coding	neuronal guanine nucleotide exchange factor [Source:HGNC Symbol;Acc:HGNC:7807]	NA	NA	NA	ENSG00000066248
ENSG00000066279	ENSG00000066279	3006.03	-0.235048	0.368625	-0.637634	0.523712	0.701394	ENSG00000066279	259266	ASPM	1	197084128	197146694	-1	protein_coding	abnormal spindle microtubule assembly [Source:HGNC Symbol;Acc:HGNC:19048]	NA	NA	NA	ENSG00000066279
ENSG00000066294	ENSG00000066294	10.0297	0.376166	0.520308	0.722968	0.4697	0.65595	ENSG00000066294	8832	CD84	1	160541095	160579516	-1	protein_coding	CD84 molecule [Source:HGNC Symbol;Acc:HGNC:1704]	cell adhesion molecule(PC00069)	immunoglobulin receptor superfamily(PC00124)	membrane-bound signaling molecule(PC00152)	ENSG00000066294
ENSG00000066322	ENSG00000066322	1955.51	0.121839	0.209589	0.581321	0.561024	0.730953	ENSG00000066322	64834	ELOVL1	1	43363397	43368074	-1	protein_coding	ELOVL fatty acid elongase 1 [Source:HGNC Symbol;Acc:HGNC:14418]	acyltransferase(PC00042)	NA	NA	ENSG00000066322
ENSG00000066336	ENSG00000066336	2.4134	-0.0652206	1.02239	-0.0637922	0.949136	0.974582	ENSG00000066336	6688	SPI1	11	47354860	47378576	-1	protein_coding	Spi-1 proto-oncogene [Source:HGNC Symbol;Acc:HGNC:11241]	nucleic acid binding(PC00171)	signaling molecule(PC00207)	winged helix/forkhead transcription factor(PC00246)	ENSG00000066336
ENSG00000066379	ENSG00000066379	275.039	0.144176	0.134274	1.07374	0.282937	0.480846	ENSG00000066379	30834	ZNRD1	6	30058899	30064909	1	protein_coding	zinc ribbon domain containing 1 [Source:HGNC Symbol;Acc:HGNC:13182]	NA	NA	NA	ENSG00000066379
ENSG00000066382	ENSG00000066382	58.966	-0.539232	0.482689	-1.11714	0.263934	0.458889	ENSG00000066382	744	MPPED2	11	30384493	30586872	-1	protein_coding	metallophosphoesterase domain containing 2 [Source:HGNC Symbol;Acc:HGNC:1180]	hydrolase(PC00121)	NA	NA	ENSG00000066382
ENSG00000066405	ENSG00000066405	0.322171	0.0996394	3.59756	0.0276964	0.977904	NA	ENSG00000066405	51208	CLDN18	3	137998735	138033655	1	protein_coding	claudin 18 [Source:HGNC Symbol;Acc:HGNC:2039]	tight junction(PC00214)	NA	NA	ENSG00000066405
ENSG00000066422	ENSG00000066422	1120.49	0.00339252	0.0976542	0.0347402	0.972287	0.986915	ENSG00000066422	27107	ZBTB11	3	101648889	101677495	-1	protein_coding	zinc finger and BTB domain containing 11 [Source:HGNC Symbol;Acc:HGNC:16740]	NA	NA	NA	ENSG00000066422
ENSG00000066427	ENSG00000066427	543.854	0.0514403	0.242176	0.212409	0.831788	0.910286	ENSG00000066427	4287	ATXN3	14	92038652	92106621	-1	protein_coding	ataxin 3 [Source:HGNC Symbol;Acc:HGNC:7106]	cysteine protease(PC00081)	transcription factor(PC00218)	NA	ENSG00000066427
ENSG00000066455	ENSG00000066455	802.331	-0.291641	0.343416	-0.849236	0.39575	0.59332	ENSG00000066455	9950	GOLGA5	14	92794231	92839963	1	protein_coding	golgin A5 [Source:HGNC Symbol;Acc:HGNC:4428]	NA	NA	NA	ENSG00000066455
ENSG00000066468	ENSG00000066468	529.105	-1.00928	0.161723	-6.2408	4.35352e-10	1.97215e-08	ENSG00000066468	2263	FGFR2	10	121478334	121598458	-1	protein_coding	fibroblast growth factor receptor 2 [Source:HGNC Symbol;Acc:HGNC:3689]	NA	NA	NA	ENSG00000066468
ENSG00000066557	ENSG00000066557	730.738	-0.269205	0.1125	-2.39294	0.0167141	0.0658251	ENSG00000066557	55631	LRRC40	1	70144805	70205620	-1	protein_coding	leucine rich repeat containing 40 [Source:HGNC Symbol;Acc:HGNC:26004]	NA	NA	NA	ENSG00000066557
ENSG00000066583	ENSG00000066583	765.783	-0.345488	0.154456	-2.2368	0.0252991	0.0898514	ENSG00000066583	51015	ISOC1	5	129094751	129114028	1	protein_coding	isochorismatase domain containing 1 [Source:HGNC Symbol;Acc:HGNC:24254]	NA	NA	NA	ENSG00000066583
ENSG00000066629	ENSG00000066629	171.081	0.132686	0.469927	0.282355	0.777671	0.879463	ENSG00000066629	2009	EML1	14	99737693	99942060	1	protein_coding	echinoderm microtubule associated protein like 1 [Source:HGNC Symbol;Acc:HGNC:3330]	NA	NA	NA	ENSG00000066629
ENSG00000066651	ENSG00000066651	398.458	0.591262	0.164218	3.60047	0.000317638	0.00286785	ENSG00000066651	60487	TRMT11	6	125986430	126039276	1	protein_coding	tRNA methyltransferase 11 homolog [Source:HGNC Symbol;Acc:HGNC:21080]	NA	NA	NA	ENSG00000066651
ENSG00000066654	ENSG00000066654	1283.85	-0.714792	0.132177	-5.40785	6.37861e-08	1.79367e-06	ENSG00000066654	55623	THUMPD1	16	20702816	20742084	-1	protein_coding	THUMP domain containing 1 [Source:HGNC Symbol;Acc:HGNC:23807]	NA	NA	NA	ENSG00000066654
ENSG00000066697	ENSG00000066697	2494.97	0.213559	0.204472	1.04444	0.29628	0.495237	ENSG00000066697	91283	MSANTD3	9	100427156	100451711	1	protein_coding	Myb/SANT DNA binding domain containing 3 [Source:HGNC Symbol;Acc:HGNC:23370]	NA	NA	NA	ENSG00000066697
ENSG00000066735	ENSG00000066735	167.155	-0.500065	0.230211	-2.1722	0.0298402	0.101189	ENSG00000066735	26153	KIF26A	14	104138723	104180894	1	protein_coding	kinesin family member 26A [Source:HGNC Symbol;Acc:HGNC:20226]	microtubule binding motor protein(PC00156)	NA	NA	ENSG00000066735
ENSG00000066739	ENSG00000066739	417.462	-0.934723	0.277018	-3.37423	0.000740238	0.00566724	ENSG00000066739	55102	ATG2B	14	96279202	96363870	-1	protein_coding	autophagy related 2B [Source:HGNC Symbol;Acc:HGNC:20187]	NA	NA	NA	ENSG00000066739
ENSG00000066777	ENSG00000066777	2014.41	0.416315	0.12311	3.38166	0.000720493	0.00555124	ENSG00000066777	10565	ARFGEF1	8	67173511	67343677	-1	protein_coding	ADP ribosylation factor guanine nucleotide exchange factor 1 [Source:HGNC Symbol;Acc:HGNC:15772]	NA	NA	NA	ENSG00000066777
ENSG00000066813	ENSG00000066813	3.16708	1.24542	1.40741	0.884904	0.376208	0.574274	ENSG00000066813	348158	ACSM2B	16	20536226	20576427	-1	protein_coding	acyl-CoA synthetase medium chain family member 2B [Source:HGNC Symbol;Acc:HGNC:30931]	dehydrogenase(PC00092)	ligase(PC00142)	NA	ENSG00000066813
ENSG00000066827	ENSG00000066827	232.122	-0.180579	0.165234	-1.09287	0.27445	0.471114	ENSG00000066827	57623	ZFAT	8	134477788	134713049	-1	protein_coding	zinc finger and AT-hook domain containing [Source:HGNC Symbol;Acc:HGNC:19899]	KRAB box transcription factor(PC00029)	NA	NA	ENSG00000066827
ENSG00000066855	ENSG00000066855	822.729	0.15599	0.189758	0.822047	0.41105	0.606581	ENSG00000066855	9650	MTFR1	8	65644734	65771261	1	protein_coding	mitochondrial fission regulator 1 [Source:HGNC Symbol;Acc:HGNC:29510]	NA	NA	NA	ENSG00000066855
ENSG00000066923	ENSG00000066923	75.3985	0.511402	0.351528	1.4548	0.145725	0.3096	ENSG00000066923	10734	STAG3	7	100177563	100221488	1	protein_coding	stromal antigen 3 [Source:HGNC Symbol;Acc:HGNC:11356]	chromatin/chromatin-binding protein(PC00077)	NA	NA	ENSG00000066923
ENSG00000066926	ENSG00000066926	536.523	-0.76389	0.303661	-2.5156	0.011883	0.050577	ENSG00000066926	2235	FECH	18	57548283	57586772	-1	protein_coding	ferrochelatase [Source:HGNC Symbol;Acc:HGNC:3647]	lyase(PC00144)	NA	NA	ENSG00000066926
ENSG00000066933	ENSG00000066933	988.471	-0.556	0.115464	-4.81536	1.46937e-06	2.89072e-05	ENSG00000066933	4649	MYO9A	15	71822289	72118577	-1	protein_coding	myosin IXA [Source:HGNC Symbol;Acc:HGNC:7608]	NA	NA	NA	ENSG00000066933
ENSG00000067048	ENSG00000067048	0.0587078	0.917077	4.32804	0.211892	0.832191	NA	ENSG00000067048	8653	DDX3Y	Y	12904108	12920478	1	protein_coding	DEAD-box helicase 3, Y-linked [Source:HGNC Symbol;Acc:HGNC:2699]	NA	NA	NA	ENSG00000067048
ENSG00000067057	ENSG00000067057	1700.11	0.149001	0.176529	0.844061	0.398635	0.595998	ENSG00000067057	5214	PFKP	10	3066333	3137712	1	protein_coding	phosphofructokinase, platelet [Source:HGNC Symbol;Acc:HGNC:8878]	carbohydrate kinase(PC00065)	NA	NA	ENSG00000067057
ENSG00000067064	ENSG00000067064	770.29	-0.477433	0.220159	-2.16858	0.0301147	0.101914	ENSG00000067064	3422	IDI1	10	1039908	1049170	-1	protein_coding	isopentenyl-diphosphate delta isomerase 1 [Source:HGNC Symbol;Acc:HGNC:5387]	isomerase(PC00135)	NA	NA	ENSG00000067064
ENSG00000067066	ENSG00000067066	1028.89	0.0810946	0.191704	0.423019	0.672281	0.81123	ENSG00000067066	6672	SP100	2	230415942	230544090	1	protein_coding	SP100 nuclear antigen [Source:HGNC Symbol;Acc:HGNC:11206]	NA	NA	NA	ENSG00000067066
ENSG00000067082	ENSG00000067082	1199.89	-0.363001	0.373472	-0.971963	0.331069	0.529662	ENSG00000067082	1316	KLF6	10	3775996	3785281	-1	protein_coding	Kruppel like factor 6 [Source:HGNC Symbol;Acc:HGNC:2235]	DNA binding protein(PC00009)	transcription cofactor(PC00217)	zinc finger transcription factor(PC00244)	ENSG00000067082
ENSG00000067113	ENSG00000067113	313.075	0.0351265	0.166148	0.211417	0.832562	0.910662	ENSG00000067113	8611	PLPP1	5	55424854	55535050	-1	protein_coding	phospholipid phosphatase 1 [Source:HGNC Symbol;Acc:HGNC:9228]	phosphatase(PC00181)	pyrophosphatase(PC00196)	NA	ENSG00000067113
ENSG00000067141	ENSG00000067141	2011.18	-0.902855	0.204159	-4.42231	9.76532e-06	0.000151638	ENSG00000067141	4756	NEO1	15	73051710	73305206	1	protein_coding	neogenin 1 [Source:HGNC Symbol;Acc:HGNC:7754]	NA	NA	NA	ENSG00000067141
ENSG00000067167	ENSG00000067167	4920.41	-0.0621811	0.23881	-0.260378	0.794572	0.889583	ENSG00000067167	23471	TRAM1	8	70573442	70608387	-1	protein_coding	translocation associated membrane protein 1 [Source:HGNC Symbol;Acc:HGNC:20568]	NA	NA	NA	ENSG00000067167
ENSG00000067177	ENSG00000067177	557.187	0.268187	0.262289	1.02249	0.306551	0.504794	ENSG00000067177	5255	PHKA1	X	72578814	72714319	-1	protein_coding	phosphorylase kinase regulatory subunit alpha 1 [Source:HGNC Symbol;Acc:HGNC:8925]	kinase activator(PC00138)	NA	NA	ENSG00000067177
ENSG00000067182	ENSG00000067182	2319.65	-0.104443	0.22664	-0.460831	0.64492	0.792471	ENSG00000067182	7132	TNFRSF1A	12	6328757	6342114	-1	protein_coding	TNF receptor superfamily member 1A [Source:HGNC Symbol;Acc:HGNC:11916]	NA	NA	NA	ENSG00000067182
ENSG00000067191	ENSG00000067191	462.068	0.115972	0.272312	0.425881	0.670195	0.810027	ENSG00000067191	782	CACNB1	17	39173456	39197703	-1	protein_coding	calcium voltage-gated channel auxiliary subunit beta 1 [Source:HGNC Symbol;Acc:HGNC:1401]	voltage-gated calcium channel(PC00240)	NA	NA	ENSG00000067191
ENSG00000067208	ENSG00000067208	647.251	-0.0810592	0.341434	-0.237408	0.81234	0.899849	ENSG00000067208	7813	EVI5	1	92508696	92792404	-1	protein_coding	ecotropic viral integration site 5 [Source:HGNC Symbol;Acc:HGNC:3501]	G-protein modulator(PC00022)	cysteine protease(PC00081)	NA	ENSG00000067208
ENSG00000067221	ENSG00000067221	182.629	-0.1709	0.302998	-0.564029	0.572735	0.739321	ENSG00000067221	9399	STOML1	15	73978923	73994622	-1	protein_coding	stomatin like 1 [Source:HGNC Symbol;Acc:HGNC:14560]	cytoskeletal protein(PC00085)	protease inhibitor(PC00191)	NA	ENSG00000067221
ENSG00000067225	ENSG00000067225	66210.5	-0.238257	0.204115	-1.16726	0.243104	0.43543	ENSG00000067225	5315	PKM	15	72199029	72231822	-1	protein_coding	pyruvate kinase, muscle [Source:HGNC Symbol;Acc:HGNC:9021]	NA	NA	NA	ENSG00000067225
ENSG00000067248	ENSG00000067248	1366.57	-0.583747	0.152214	-3.83504	0.000125545	0.00133017	ENSG00000067248	54505	DHX29	5	55256245	55307722	-1	protein_coding	DExH-box helicase 29 [Source:HGNC Symbol;Acc:HGNC:15815]	RNA helicase(PC00032)	NA	NA	ENSG00000067248
ENSG00000067334	ENSG00000067334	2182.81	0.459785	0.214143	2.14709	0.0317859	0.105772	ENSG00000067334	30836	DNTTIP2	1	93866283	93879918	-1	protein_coding	deoxynucleotidyltransferase terminal interacting protein 2 [Source:HGNC Symbol;Acc:HGNC:24013]	NA	NA	NA	ENSG00000067334
ENSG00000067365	ENSG00000067365	548.239	0.0870609	0.168847	0.515619	0.606121	0.763959	ENSG00000067365	79091	METTL22	16	8621683	8649654	1	protein_coding	methyltransferase like 22 [Source:HGNC Symbol;Acc:HGNC:28368]	methyltransferase(PC00155)	NA	NA	ENSG00000067365
ENSG00000067369	ENSG00000067369	2385.92	-0.445849	0.0849694	-5.24717	1.54451e-07	3.92936e-06	ENSG00000067369	7158	TP53BP1	15	43403061	43510728	-1	protein_coding	tumor protein p53 binding protein 1 [Source:HGNC Symbol;Acc:HGNC:11999]	NA	NA	NA	ENSG00000067369
ENSG00000067445	ENSG00000067445	2249.82	-0.170047	0.163791	-1.0382	0.299178	0.497797	ENSG00000067445	7216	TRO	X	54920462	54931431	1	protein_coding	trophinin [Source:HGNC Symbol;Acc:HGNC:12326]	cell adhesion molecule(PC00069)	NA	NA	ENSG00000067445
ENSG00000067533	ENSG00000067533	592.74	0.181399	0.220154	0.823963	0.40996	0.605592	ENSG00000067533	51018	RRP15	1	218285287	218337983	1	protein_coding	ribosomal RNA processing 15 homolog [Source:HGNC Symbol;Acc:HGNC:24255]	NA	NA	NA	ENSG00000067533
ENSG00000067560	ENSG00000067560	10344.3	-0.210214	0.189697	-1.10816	0.267794	0.463563	ENSG00000067560	387	RHOA	3	49359145	49412998	-1	protein_coding	ras homolog family member A [Source:HGNC Symbol;Acc:HGNC:667]	small GTPase(PC00208)	NA	NA	ENSG00000067560
ENSG00000067596	ENSG00000067596	1546.68	-0.546179	0.117779	-4.63734	3.52927e-06	6.21308e-05	ENSG00000067596	1659	DHX8	17	43483865	43544463	1	protein_coding	DEAH-box helicase 8 [Source:HGNC Symbol;Acc:HGNC:2749]	RNA helicase(PC00032)	NA	NA	ENSG00000067596
ENSG00000067601	ENSG00000067601	60.6202	-0.520333	0.199945	-2.60239	0.00925776	0.0416805	ENSG00000067601	NA	PMS2P4	7	67295608	67302907	-1	transcribed_unprocessed_pseudogene	PMS1 homolog 2, mismatch repair system component pseudogene 4 [Source:HGNC Symbol;Acc:HGNC:9129]	NA	NA	NA	ENSG00000067601
ENSG00000067606	ENSG00000067606	541.193	0.18006	0.31586	0.570062	0.568636	0.736282	ENSG00000067606	5590	PRKCZ	1	2050470	2185395	1	protein_coding	protein kinase C zeta [Source:HGNC Symbol;Acc:HGNC:9412]	annexin(PC00050)	calmodulin(PC00061)	non-receptor serine/threonine protein kinase(PC00167)	ENSG00000067606
ENSG00000067646	ENSG00000067646	0.0589248	0	4.32804	0	1	NA	ENSG00000067646	7544	ZFY	Y	2935281	2982506	1	protein_coding	zinc finger protein, Y-linked [Source:HGNC Symbol;Acc:HGNC:12870]	KRAB box transcription factor(PC00029)	NA	NA	ENSG00000067646
ENSG00000067704	ENSG00000067704	3639.71	-0.20792	0.143802	-1.44587	0.148213	0.313006	ENSG00000067704	55699	IARS2	1	220094102	220148041	1	protein_coding	isoleucyl-tRNA synthetase 2, mitochondrial [Source:HGNC Symbol;Acc:HGNC:29685]	aminoacyl-tRNA synthetase(PC00047)	NA	NA	ENSG00000067704
ENSG00000067715	ENSG00000067715	96.8049	-0.984709	0.423523	-2.32504	0.0200698	0.0755795	ENSG00000067715	6857	SYT1	12	78863993	79452008	1	protein_coding	synaptotagmin 1 [Source:HGNC Symbol;Acc:HGNC:11509]	membrane trafficking regulatory protein(PC00151)	NA	NA	ENSG00000067715
ENSG00000067798	ENSG00000067798	1018.77	0.758258	0.174644	4.34173	1.41367e-05	0.000207535	ENSG00000067798	89795	NAV3	12	77324641	78213008	1	protein_coding	neuron navigator 3 [Source:HGNC Symbol;Acc:HGNC:15998]	NA	NA	NA	ENSG00000067798
ENSG00000067829	ENSG00000067829	817.878	0.967754	0.0994366	9.73237	2.19421e-22	5.54696e-20	ENSG00000067829	3421	IDH3G	X	153785766	153794523	-1	protein_coding	isocitrate dehydrogenase 3 (NAD(+)) gamma [Source:HGNC Symbol;Acc:HGNC:5386]	dehydrogenase(PC00092)	NA	NA	ENSG00000067829
ENSG00000067836	ENSG00000067836	521.886	-0.440377	0.399606	-1.10203	0.27045	0.466624	ENSG00000067836	79641	ROGDI	16	4796968	4802950	-1	protein_coding	rogdi homolog [Source:HGNC Symbol;Acc:HGNC:29478]	NA	NA	NA	ENSG00000067836
ENSG00000067840	ENSG00000067840	568.487	-0.913791	0.333172	-2.7427	0.00609359	0.030324	ENSG00000067840	57595	PDZD4	X	153802166	153830565	-1	protein_coding	PDZ domain containing 4 [Source:HGNC Symbol;Acc:HGNC:21167]	NA	NA	NA	ENSG00000067840
ENSG00000067842	ENSG00000067842	33.9627	0.8096	0.591927	1.36774	0.171394	0.344607	ENSG00000067842	492	ATP2B3	X	153517676	153582939	1	protein_coding	ATPase plasma membrane Ca2+ transporting 3 [Source:HGNC Symbol;Acc:HGNC:816]	cation transporter(PC00068)	hydrolase(PC00121)	ion channel(PC00133)	ENSG00000067842
ENSG00000067900	ENSG00000067900	2359.18	-0.504138	0.180366	-2.79508	0.00518875	0.0267097	ENSG00000067900	6093	ROCK1	18	20946906	21111851	-1	protein_coding	Rho associated coiled-coil containing protein kinase 1 [Source:HGNC Symbol;Acc:HGNC:10251]	non-receptor serine/threonine protein kinase(PC00167)	NA	NA	ENSG00000067900
ENSG00000067955	ENSG00000067955	1580.87	-0.267722	0.215493	-1.24237	0.2141	0.400788	ENSG00000067955	865	CBFB	16	67029116	67101058	1	protein_coding	core-binding factor beta subunit [Source:HGNC Symbol;Acc:HGNC:1539]	NA	NA	NA	ENSG00000067955
ENSG00000067992	ENSG00000067992	308.492	-0.181271	0.187781	-0.96533	0.334379	0.532916	ENSG00000067992	5165	PDK3	X	24465221	24539837	1	protein_coding	pyruvate dehydrogenase kinase 3 [Source:HGNC Symbol;Acc:HGNC:8811]	protein kinase(PC00193)	NA	NA	ENSG00000067992
ENSG00000068001	ENSG00000068001	1547.35	0.1161	0.107055	1.08449	0.278146	0.475578	ENSG00000068001	8692	HYAL2	3	50317790	50322906	-1	protein_coding	hyaluronoglucosaminidase 2 [Source:HGNC Symbol;Acc:HGNC:5321]	glycosidase(PC00110)	receptor(PC00197)	NA	ENSG00000068001
ENSG00000068024	ENSG00000068024	84.4095	-0.406712	0.339725	-1.19718	0.231236	0.421005	ENSG00000068024	9759	HDAC4	2	239048168	239401654	-1	protein_coding	histone deacetylase 4 [Source:HGNC Symbol;Acc:HGNC:14063]	NA	NA	NA	ENSG00000068024
ENSG00000068028	ENSG00000068028	444.965	1.02936	0.256616	4.01128	6.03892e-05	0.00072284	ENSG00000068028	11186	RASSF1	3	50329782	50340980	-1	protein_coding	Ras association domain family member 1 [Source:HGNC Symbol;Acc:HGNC:9882]	G-protein modulator(PC00022)	NA	NA	ENSG00000068028
ENSG00000068078	ENSG00000068078	98.0763	1.01542	0.477358	2.12716	0.0334067	0.109806	ENSG00000068078	2261	FGFR3	4	1793307	1808872	1	protein_coding	fibroblast growth factor receptor 3 [Source:HGNC Symbol;Acc:HGNC:3690]	NA	NA	NA	ENSG00000068078
ENSG00000068079	ENSG00000068079	3.90591	1.3013	0.996166	1.30631	0.191447	0.371552	ENSG00000068079	3430	IFI35	17	43006725	43014456	1	protein_coding	interferon induced protein 35 [Source:HGNC Symbol;Acc:HGNC:5399]	transcription cofactor(PC00217)	NA	NA	ENSG00000068079
ENSG00000068097	ENSG00000068097	1207.04	-0.179544	0.189057	-0.949686	0.342272	0.540621	ENSG00000068097	63897	HEATR6	17	60043194	60078931	-1	protein_coding	HEAT repeat containing 6 [Source:HGNC Symbol;Acc:HGNC:24076]	major histocompatibility complex antigen(PC00149)	NA	NA	ENSG00000068097
ENSG00000068120	ENSG00000068120	2012.45	-0.116476	0.177829	-0.654989	0.512475	0.692267	ENSG00000068120	80347	COASY	17	42561467	42566277	1	protein_coding	Coenzyme A synthase [Source:HGNC Symbol;Acc:HGNC:29932]	kinase(PC00137)	NA	NA	ENSG00000068120
ENSG00000068137	ENSG00000068137	581.27	0.609897	0.280436	2.17482	0.0296438	0.100712	ENSG00000068137	79990	PLEKHH3	17	42667914	42676994	-1	protein_coding	pleckstrin homology, MyTH4 and FERM domain containing H3 [Source:HGNC Symbol;Acc:HGNC:26105]	NA	NA	NA	ENSG00000068137
ENSG00000068305	ENSG00000068305	1299.93	-0.0747735	0.1468	-0.509356	0.610503	0.767073	ENSG00000068305	4205	MEF2A	15	99565417	99716466	1	protein_coding	myocyte enhancer factor 2A [Source:HGNC Symbol;Acc:HGNC:6993]	MADS box transcription factor(PC00250)	NA	NA	ENSG00000068305
ENSG00000068308	ENSG00000068308	1609.15	0.0123074	0.234414	0.052503	0.958128	0.979199	ENSG00000068308	55593	OTUD5	X	48922028	48958386	-1	protein_coding	OTU deubiquitinase 5 [Source:HGNC Symbol;Acc:HGNC:25402]	cysteine protease(PC00081)	nucleic acid binding(PC00171)	NA	ENSG00000068308
ENSG00000068323	ENSG00000068323	3019.23	0.614157	0.0900203	6.82243	8.9514e-12	5.5193e-10	ENSG00000068323	7030	TFE3	X	49028726	49043486	-1	protein_coding	transcription factor binding to IGHM enhancer 3 [Source:HGNC Symbol;Acc:HGNC:11752]	NA	NA	NA	ENSG00000068323
ENSG00000068354	ENSG00000068354	606.933	0.126379	0.158115	0.799284	0.424126	0.618048	ENSG00000068354	4943	TBC1D25	X	48539457	48562609	1	protein_coding	TBC1 domain family member 25 [Source:HGNC Symbol;Acc:HGNC:8092]	G-protein modulator(PC00022)	cysteine protease(PC00081)	NA	ENSG00000068354
ENSG00000068366	ENSG00000068366	1628.1	-0.351338	0.292028	-1.2031	0.228939	0.418177	ENSG00000068366	2182	ACSL4	X	109624244	109733403	-1	protein_coding	acyl-CoA synthetase long chain family member 4 [Source:HGNC Symbol;Acc:HGNC:3571]	ligase(PC00142)	NA	NA	ENSG00000068366
ENSG00000068383	ENSG00000068383	445.376	-0.427418	0.233064	-1.83391	0.0666677	0.180328	ENSG00000068383	3632	INPP5A	10	132537820	132783480	1	protein_coding	inositol polyphosphate-5-phosphatase A [Source:HGNC Symbol;Acc:HGNC:6076]	phosphatase(PC00181)	NA	NA	ENSG00000068383
ENSG00000068394	ENSG00000068394	738.341	0.0841491	0.117591	0.715606	0.474235	0.65966	ENSG00000068394	27238	GPKOW	X	49113389	49123801	-1	protein_coding	G-patch domain and KOW motifs [Source:HGNC Symbol;Acc:HGNC:30677]	nucleic acid binding(PC00171)	NA	NA	ENSG00000068394
ENSG00000068400	ENSG00000068400	1452.07	0.169606	0.112859	1.50281	0.132889	0.290735	ENSG00000068400	56850	GRIPAP1	X	48973720	49002264	-1	protein_coding	GRIP1 associated protein 1 [Source:HGNC Symbol;Acc:HGNC:18706]	NA	NA	NA	ENSG00000068400
ENSG00000068438	ENSG00000068438	1823.28	0.27217	0.160321	1.69765	0.0895729	0.220702	ENSG00000068438	24140	FTSJ1	X	48476021	48486364	1	protein_coding	FtsJ RNA methyltransferase homolog 1 (E. coli) [Source:HGNC Symbol;Acc:HGNC:13254]	NA	NA	NA	ENSG00000068438
ENSG00000068489	ENSG00000068489	5223.18	-1.35638	0.264496	-5.12815	2.92596e-07	6.98473e-06	ENSG00000068489	55771	PRR11	17	59155499	59204705	1	protein_coding	proline rich 11 [Source:HGNC Symbol;Acc:HGNC:25619]	NA	NA	NA	ENSG00000068489
ENSG00000068615	ENSG00000068615	70.1706	0.0784046	0.277519	0.28252	0.777545	0.879404	ENSG00000068615	65055	REEP1	2	86213993	86338083	-1	protein_coding	receptor accessory protein 1 [Source:HGNC Symbol;Acc:HGNC:25786]	receptor(PC00197)	transporter(PC00227)	NA	ENSG00000068615
ENSG00000068650	ENSG00000068650	2349.56	-0.161667	0.284773	-0.567706	0.570235	0.737485	ENSG00000068650	23250	ATP11A	13	112690329	112887168	1	protein_coding	ATPase phospholipid transporting 11A [Source:HGNC Symbol;Acc:HGNC:13552]	cation transporter(PC00068)	hydrolase(PC00121)	NA	ENSG00000068650
ENSG00000068654	ENSG00000068654	2531.66	0.0799856	0.304276	0.262872	0.792649	0.888532	ENSG00000068654	NA	POLR1A	2	86020216	86106155	-1	protein_coding	RNA polymerase I subunit A [Source:HGNC Symbol;Acc:HGNC:17264]	DNA-directed RNA polymerase(PC00019)	nucleotidyltransferase(PC00174)	NA	ENSG00000068654
ENSG00000068697	ENSG00000068697	4489.51	0.224916	0.110061	2.04355	0.0409977	0.127528	ENSG00000068697	9741	LAPTM4A	2	20032650	20052028	-1	protein_coding	lysosomal protein transmembrane 4 alpha [Source:HGNC Symbol;Acc:HGNC:6924]	transporter(PC00227)	NA	NA	ENSG00000068697
ENSG00000068724	ENSG00000068724	524.019	0.274013	0.121397	2.25716	0.023998	0.086371	ENSG00000068724	57217	TTC7A	2	46916157	47076137	1	protein_coding	tetratricopeptide repeat domain 7A [Source:HGNC Symbol;Acc:HGNC:19750]	NA	NA	NA	ENSG00000068724
ENSG00000068745	ENSG00000068745	2149.29	0.344708	0.200576	1.71859	0.0856884	0.214009	ENSG00000068745	51447	IP6K2	3	48688003	48740353	-1	protein_coding	inositol hexakisphosphate kinase 2 [Source:HGNC Symbol;Acc:HGNC:17313]	kinase(PC00137)	NA	NA	ENSG00000068745
ENSG00000068781	ENSG00000068781	3.33362	2.04792	1.99886	1.02454	0.305579	0.504081	ENSG00000068781	286749	STON1-GTF2A1L	2	48529925	48776517	1	protein_coding	STON1-GTF2A1L readthrough [Source:HGNC Symbol;Acc:HGNC:30651]	nucleic acid binding(PC00171)	transcription cofactor(PC00217)	NA	ENSG00000068781
ENSG00000068784	ENSG00000068784	691.808	-0.632473	0.110112	-5.74393	9.25022e-09	3.13887e-07	ENSG00000068784	55133	SRBD1	2	45388680	45612165	-1	protein_coding	S1 RNA binding domain 1 [Source:HGNC Symbol;Acc:HGNC:25521]	nucleic acid binding(PC00171)	NA	NA	ENSG00000068784
ENSG00000068796	ENSG00000068796	2237.86	-0.90996	0.192524	-4.72648	2.2845e-06	4.22784e-05	ENSG00000068796	3796	KIF2A	5	62306162	62537249	1	protein_coding	kinesin family member 2A [Source:HGNC Symbol;Acc:HGNC:6318]	microtubule binding motor protein(PC00156)	NA	NA	ENSG00000068796
ENSG00000068831	ENSG00000068831	33.6507	0.998101	0.78142	1.27729	0.201499	0.384969	ENSG00000068831	10235	RASGRP2	11	64726911	64745456	-1	protein_coding	RAS guanyl releasing protein 2 [Source:HGNC Symbol;Acc:HGNC:9879]	guanyl-nucleotide exchange factor(PC00113)	NA	NA	ENSG00000068831
ENSG00000068878	ENSG00000068878	4653.47	0.598605	0.171483	3.49076	0.000481643	0.00402643	ENSG00000068878	23198	PSME4	2	53864067	53970840	-1	protein_coding	proteasome activator subunit 4 [Source:HGNC Symbol;Acc:HGNC:20635]	NA	NA	NA	ENSG00000068878
ENSG00000068885	ENSG00000068885	997.591	-0.220393	0.282574	-0.779946	0.435422	0.627636	ENSG00000068885	57560	IFT80	3	160256986	160399880	-1	protein_coding	intraflagellar transport 80 [Source:HGNC Symbol;Acc:HGNC:29262]	NA	NA	NA	ENSG00000068885
ENSG00000068903	ENSG00000068903	362.875	-0.0139152	0.207697	-0.0669978	0.946583	0.973732	ENSG00000068903	22933	SIRT2	19	38878555	38899862	-1	protein_coding	sirtuin 2 [Source:HGNC Symbol;Acc:HGNC:10886]	chromatin/chromatin-binding protein(PC00077)	deacetylase(PC00087)	NA	ENSG00000068903
ENSG00000068912	ENSG00000068912	2313.51	-0.0460948	0.214658	-0.214737	0.829973	0.909717	ENSG00000068912	27248	ERLEC1	2	53787044	53818819	1	protein_coding	endoplasmic reticulum lectin 1 [Source:HGNC Symbol;Acc:HGNC:25222]	NA	NA	NA	ENSG00000068912
ENSG00000068971	ENSG00000068971	345.091	1.07181	0.190551	5.62477	1.85754e-08	5.94414e-07	ENSG00000068971	5526	PPP2R5B	11	64917553	64934473	1	protein_coding	protein phosphatase 2 regulatory subunit B'beta [Source:HGNC Symbol;Acc:HGNC:9310]	protein phosphatase(PC00195)	NA	NA	ENSG00000068971
ENSG00000068976	ENSG00000068976	58.6323	0.597751	0.500886	1.19339	0.232718	0.423033	ENSG00000068976	5837	PYGM	11	64746389	64760297	-1	protein_coding	glycogen phosphorylase, muscle associated [Source:HGNC Symbol;Acc:HGNC:9726]	phosphorylase(PC00187)	NA	NA	ENSG00000068976
ENSG00000068985	ENSG00000068985	17.9312	4.75804	0.844916	5.63138	1.7877e-08	5.75707e-07	ENSG00000068985	8712	PAGE1	X	49687450	49695993	-1	protein_coding	PAGE family member 1 [Source:HGNC Symbol;Acc:HGNC:4107]	NA	NA	NA	ENSG00000068985
ENSG00000069011	ENSG00000069011	177.18	-0.20444	0.229527	-0.890701	0.37309	0.571445	ENSG00000069011	5307	PITX1	5	135027735	135034813	-1	protein_coding	paired like homeodomain 1 [Source:HGNC Symbol;Acc:HGNC:9004]	NA	NA	NA	ENSG00000069011
ENSG00000069018	ENSG00000069018	0.0560307	0	4.32804	0	1	NA	ENSG00000069018	57113	TRPC7	5	136213320	136365537	-1	protein_coding	transient receptor potential cation channel subfamily C member 7 [Source:HGNC Symbol;Acc:HGNC:20754]	ion channel(PC00133)	NA	NA	ENSG00000069018
ENSG00000069020	ENSG00000069020	765.358	-0.717875	0.340078	-2.11092	0.0347795	0.113215	ENSG00000069020	375449	MAST4	5	66596361	67169595	1	protein_coding	microtubule associated serine/threonine kinase family member 4 [Source:HGNC Symbol;Acc:HGNC:19037]	annexin(PC00050)	calmodulin(PC00061)	non-receptor serine/threonine protein kinase(PC00167)	ENSG00000069020
ENSG00000069122	ENSG00000069122	37.5818	1.94803	0.540285	3.60555	0.000311487	0.00282236	ENSG00000069122	221395	ADGRF5	6	46852512	46954943	-1	protein_coding	adhesion G protein-coupled receptor F5 [Source:HGNC Symbol;Acc:HGNC:19030]	NA	NA	NA	ENSG00000069122
ENSG00000069188	ENSG00000069188	1057.73	-0.0601016	0.382923	-0.156955	0.875281	0.934816	ENSG00000069188	54549	SDK2	17	73334384	73644089	-1	protein_coding	sidekick cell adhesion molecule 2 [Source:HGNC Symbol;Acc:HGNC:19308]	NA	NA	NA	ENSG00000069188
ENSG00000069206	ENSG00000069206	0.175034	-0.525604	4.32804	-0.121442	0.903341	NA	ENSG00000069206	8756	ADAM7	8	24440930	24526970	1	protein_coding	ADAM metallopeptidase domain 7 [Source:HGNC Symbol;Acc:HGNC:214]	metalloprotease(PC00153)	NA	NA	ENSG00000069206
ENSG00000069248	ENSG00000069248	1375.01	0.293538	0.172742	1.69928	0.0892657	0.220183	ENSG00000069248	55746	NUP133	1	229440260	229508341	-1	protein_coding	nucleoporin 133 [Source:HGNC Symbol;Acc:HGNC:18016]	NA	NA	NA	ENSG00000069248
ENSG00000069275	ENSG00000069275	11508.1	-0.569586	0.174049	-3.27256	0.00106577	0.00760015	ENSG00000069275	64710	NUCKS1	1	205712819	205750276	-1	protein_coding	nuclear casein kinase and cyclin dependent kinase substrate 1 [Source:HGNC Symbol;Acc:HGNC:29923]	NA	NA	NA	ENSG00000069275
ENSG00000069329	ENSG00000069329	3083.31	-0.163533	0.222344	-0.735494	0.462039	0.649919	ENSG00000069329	55737	VPS35	16	46656132	46689518	-1	protein_coding	VPS35, retromer complex component [Source:HGNC Symbol;Acc:HGNC:13487]	membrane traffic protein(PC00150)	NA	NA	ENSG00000069329
ENSG00000069345	ENSG00000069345	1891.86	0.370259	0.163633	2.26275	0.0236514	0.0853666	ENSG00000069345	10294	DNAJA2	16	46955362	46973788	-1	protein_coding	DnaJ heat shock protein family (Hsp40) member A2 [Source:HGNC Symbol;Acc:HGNC:14884]	NA	NA	NA	ENSG00000069345
ENSG00000069399	ENSG00000069399	287.448	1.46741	0.315749	4.64738	3.36171e-06	5.95543e-05	ENSG00000069399	602	BCL3	19	44747705	44760044	1	protein_coding	B-cell CLL/lymphoma 3 [Source:HGNC Symbol;Acc:HGNC:998]	NA	NA	NA	ENSG00000069399
ENSG00000069424	ENSG00000069424	577.036	-0.0048116	0.245494	-0.0195997	0.984363	0.99344	ENSG00000069424	8514	KCNAB2	1	5991466	6101193	1	protein_coding	potassium voltage-gated channel subfamily A regulatory beta subunit 2 [Source:HGNC Symbol;Acc:HGNC:6229]	NA	NA	NA	ENSG00000069424
ENSG00000069431	ENSG00000069431	319.113	0.1725	0.362513	0.475845	0.634185	0.784661	ENSG00000069431	10060	ABCC9	12	21797401	21942529	-1	protein_coding	ATP binding cassette subfamily C member 9 [Source:HGNC Symbol;Acc:HGNC:60]	ATP-binding cassette (ABC) transporter(PC00003)	NA	NA	ENSG00000069431
ENSG00000069482	ENSG00000069482	1.21906	1.9546	1.57794	1.2387	0.215456	NA	ENSG00000069482	51083	GAL	11	68683779	68691175	1	protein_coding	galanin and GMAP prepropeptide [Source:HGNC Symbol;Acc:HGNC:4114]	NA	NA	NA	ENSG00000069482
ENSG00000069493	ENSG00000069493	288.182	1.3674	0.561048	2.43723	0.0148002	0.0598447	ENSG00000069493	29121	CLEC2D	12	9664969	9699555	1	protein_coding	C-type lectin domain family 2 member D [Source:HGNC Symbol;Acc:HGNC:14351]	NA	NA	NA	ENSG00000069493
ENSG00000069509	ENSG00000069509	535.057	0.245461	0.131963	1.86007	0.0628753	0.173411	ENSG00000069509	139341	FUNDC1	X	44523639	44543001	-1	protein_coding	FUN14 domain containing 1 [Source:HGNC Symbol;Acc:HGNC:28746]	NA	NA	NA	ENSG00000069509
ENSG00000069535	ENSG00000069535	133.845	0.495521	0.445228	1.11296	0.265726	0.460985	ENSG00000069535	4129	MAOB	X	43766611	43882447	-1	protein_coding	monoamine oxidase B [Source:HGNC Symbol;Acc:HGNC:6834]	DNA methyltransferase(PC00013)	oxidase(PC00175)	NA	ENSG00000069535
ENSG00000069667	ENSG00000069667	451.127	-0.0532112	0.312819	-0.170102	0.86493	0.928701	ENSG00000069667	6095	RORA	15	60488284	61229319	-1	protein_coding	RAR related orphan receptor A [Source:HGNC Symbol;Acc:HGNC:10258]	NA	NA	NA	ENSG00000069667
ENSG00000069696	ENSG00000069696	9.95946	1.34022	0.75855	1.76682	0.0772577	0.199497	ENSG00000069696	1815	DRD4	11	637293	640706	1	protein_coding	dopamine receptor D4 [Source:HGNC Symbol;Acc:HGNC:3025]	G-protein coupled receptor(PC00021)	NA	NA	ENSG00000069696
ENSG00000069702	ENSG00000069702	245.243	0.225626	0.333257	0.677033	0.498385	0.679824	ENSG00000069702	7049	TGFBR3	1	91680343	91906335	-1	protein_coding	transforming growth factor beta receptor 3 [Source:HGNC Symbol;Acc:HGNC:11774]	NA	NA	NA	ENSG00000069702
ENSG00000069764	ENSG00000069764	0.727398	0.684462	3.24316	0.211048	0.83285	NA	ENSG00000069764	8399	PLA2G10	16	14672545	14694669	-1	protein_coding	phospholipase A2 group X [Source:HGNC Symbol;Acc:HGNC:9029]	phospholipase(PC00186)	NA	NA	ENSG00000069764
ENSG00000069812	ENSG00000069812	14.9372	-0.151919	0.503812	-0.30154	0.763003	0.869938	ENSG00000069812	54626	HES2	1	6412418	6424670	-1	protein_coding	hes family bHLH transcription factor 2 [Source:HGNC Symbol;Acc:HGNC:16005]	basic helix-loop-helix transcription factor(PC00055)	NA	NA	ENSG00000069812
ENSG00000069849	ENSG00000069849	1838.33	0.452227	0.239815	1.88573	0.0593315	0.166526	ENSG00000069849	483	ATP1B3	3	141876124	141926514	1	protein_coding	ATPase Na+/K+ transporting subunit beta 3 [Source:HGNC Symbol;Acc:HGNC:806]	cation transporter(PC00068)	NA	NA	ENSG00000069849
ENSG00000069869	ENSG00000069869	2276.11	-0.0713975	0.252169	-0.283133	0.777075	0.879104	ENSG00000069869	4734	NEDD4	15	55826922	55993746	-1	protein_coding	neural precursor cell expressed, developmentally down-regulated 4, E3 ubiquitin protein ligase [Source:HGNC Symbol;Acc:HGNC:7727]	ubiquitin-protein ligase(PC00234)	NA	NA	ENSG00000069869
ENSG00000069943	ENSG00000069943	235.659	1.04288	0.34278	3.04241	0.00234693	0.0142553	ENSG00000069943	9488	PIGB	15	55318960	55355648	1	protein_coding	phosphatidylinositol glycan anchor biosynthesis class B [Source:HGNC Symbol;Acc:HGNC:8959]	glycosyltransferase(PC00111)	NA	NA	ENSG00000069943
ENSG00000069956	ENSG00000069956	3232.18	-0.859466	0.291164	-2.95183	0.00315898	0.0180513	ENSG00000069956	5597	MAPK6	15	51952106	52067372	1	protein_coding	mitogen-activated protein kinase 6 [Source:HGNC Symbol;Acc:HGNC:6879]	non-receptor serine/threonine protein kinase(PC00167)	NA	NA	ENSG00000069956
ENSG00000069966	ENSG00000069966	783.525	-0.682728	0.126199	-5.40992	6.30517e-08	1.77698e-06	ENSG00000069966	10681	GNB5	15	52115105	52191369	-1	protein_coding	G protein subunit beta 5 [Source:HGNC Symbol;Acc:HGNC:4401]	heterotrimeric G-protein(PC00117)	hydrolase(PC00121)	NA	ENSG00000069966
ENSG00000069974	ENSG00000069974	416.682	-0.508155	0.20342	-2.49806	0.0124874	0.0525347	ENSG00000069974	5873	RAB27A	15	55202966	55319113	-1	protein_coding	RAB27A, member RAS oncogene family [Source:HGNC Symbol;Acc:HGNC:9766]	NA	NA	NA	ENSG00000069974
ENSG00000069998	ENSG00000069998	627.579	-0.000469224	0.199114	-0.00235656	0.99812	0.999417	ENSG00000069998	27440	HDHD5	22	17137511	17165287	-1	protein_coding	haloacid dehalogenase like hydrolase domain containing 5 [Source:HGNC Symbol;Acc:HGNC:1843]	transferase(PC00220)	NA	NA	ENSG00000069998
ENSG00000070010	ENSG00000070010	3628.61	0.136828	0.145588	0.93983	0.347305	0.545401	ENSG00000070010	7353	UFD1	22	19449910	19479215	-1	protein_coding	ubiquitin recognition factor in ER associated degradation 1 [Source:HGNC Symbol;Acc:HGNC:12520]	NA	NA	NA	ENSG00000070010
ENSG00000070018	ENSG00000070018	3471.76	-0.139587	0.100589	-1.38769	0.165231	0.337076	ENSG00000070018	4040	LRP6	12	12116025	12267012	-1	protein_coding	LDL receptor related protein 6 [Source:HGNC Symbol;Acc:HGNC:6698]	NA	NA	NA	ENSG00000070018
ENSG00000070019	ENSG00000070019	0.471898	1.19447	2.32364	0.514053	0.607215	NA	ENSG00000070019	2984	GUCY2C	12	14612632	14696585	-1	protein_coding	guanylate cyclase 2C [Source:HGNC Symbol;Acc:HGNC:4688]	adenylate cyclase(PC00043)	guanylate cyclase(PC00114)	NA	ENSG00000070019
ENSG00000070031	ENSG00000070031	0.21101	0.195736	4.32804	0.0452252	0.963928	NA	ENSG00000070031	6343	SCT	11	626431	627143	-1	protein_coding	secretin [Source:HGNC Symbol;Acc:HGNC:10607]	NA	NA	NA	ENSG00000070031
ENSG00000070047	ENSG00000070047	868.457	0.16033	0.170801	0.938696	0.347887	0.545942	ENSG00000070047	57661	PHRF1	11	576486	612222	1	protein_coding	PHD and ring finger domains 1 [Source:HGNC Symbol;Acc:HGNC:24351]	NA	NA	NA	ENSG00000070047
ENSG00000070061	ENSG00000070061	1348.56	1.21062	0.158361	7.64469	2.09445e-14	1.89777e-12	ENSG00000070061	8518	ELP1	9	108867517	108934116	-1	protein_coding	elongator complex protein 1 [Source:HGNC Symbol;Acc:HGNC:5959]	kinase activator(PC00138)	NA	NA	ENSG00000070061
ENSG00000070081	ENSG00000070081	3978.49	0.832604	0.247026	3.37051	0.000750282	0.00573198	ENSG00000070081	4925	NUCB2	11	17208153	17349974	1	protein_coding	nucleobindin 2 [Source:HGNC Symbol;Acc:HGNC:8044]	annexin(PC00050)	calmodulin(PC00061)	nucleic acid binding(PC00171)	ENSG00000070081
ENSG00000070087	ENSG00000070087	5263.9	-0.69513	0.19581	-3.55002	0.000385198	0.00334122	ENSG00000070087	5217	PFN2	3	149964904	150050788	-1	protein_coding	profilin 2 [Source:HGNC Symbol;Acc:HGNC:8882]	NA	NA	NA	ENSG00000070087
ENSG00000070159	ENSG00000070159	813.194	0.705594	0.270309	2.61032	0.00904563	0.0409003	ENSG00000070159	5774	PTPN3	9	109375466	109498313	-1	protein_coding	protein tyrosine phosphatase, non-receptor type 3 [Source:HGNC Symbol;Acc:HGNC:9655]	NA	NA	NA	ENSG00000070159
ENSG00000070182	ENSG00000070182	881.017	-0.0894646	0.245101	-0.365011	0.715103	0.838605	ENSG00000070182	6710	SPTB	14	64746283	64879883	-1	protein_coding	spectrin beta, erythrocytic [Source:HGNC Symbol;Acc:HGNC:11274]	NA	NA	NA	ENSG00000070182
ENSG00000070190	ENSG00000070190	12.8776	-0.570847	0.437897	-1.30361	0.192367	0.372697	ENSG00000070190	27071	DAPP1	4	99816833	99870154	1	protein_coding	dual adaptor of phosphotyrosine and 3-phosphoinositides 1 [Source:HGNC Symbol;Acc:HGNC:16500]	NA	NA	NA	ENSG00000070190
ENSG00000070193	ENSG00000070193	3.71999	-1.45447	1.25332	-1.16049	0.245848	0.437989	ENSG00000070193	2255	FGF10	5	44303544	44389706	-1	protein_coding	fibroblast growth factor 10 [Source:HGNC Symbol;Acc:HGNC:3666]	growth factor(PC00112)	NA	NA	ENSG00000070193
ENSG00000070214	ENSG00000070214	2028.46	-1.03283	0.371358	-2.78122	0.00541556	0.0276744	ENSG00000070214	23446	SLC44A1	9	105244622	105439171	1	protein_coding	solute carrier family 44 member 1 [Source:HGNC Symbol;Acc:HGNC:18798]	transporter(PC00227)	NA	NA	ENSG00000070214
ENSG00000070269	ENSG00000070269	489.137	0.267671	0.249877	1.07121	0.284074	0.482134	ENSG00000070269	54916	TMEM260	14	56488354	56650606	1	protein_coding	transmembrane protein 260 [Source:HGNC Symbol;Acc:HGNC:20185]	NA	NA	NA	ENSG00000070269
ENSG00000070366	ENSG00000070366	954.428	-0.174725	0.212499	-0.822237	0.410942	0.606528	ENSG00000070366	23293	SMG6	17	2059839	2303771	-1	protein_coding	SMG6, nonsense mediated mRNA decay factor [Source:HGNC Symbol;Acc:HGNC:17809]	NA	NA	NA	ENSG00000070366
ENSG00000070367	ENSG00000070367	4200.43	-0.756557	0.371071	-2.03884	0.0414656	0.128525	ENSG00000070367	10640	EXOC5	14	57200507	57269008	-1	protein_coding	exocyst complex component 5 [Source:HGNC Symbol;Acc:HGNC:10696]	membrane trafficking regulatory protein(PC00151)	NA	NA	ENSG00000070367
ENSG00000070371	ENSG00000070371	807.826	-0.359343	0.173194	-2.0748	0.0380054	0.120716	ENSG00000070371	8218	CLTCL1	22	19179473	19291716	-1	protein_coding	clathrin heavy chain like 1 [Source:HGNC Symbol;Acc:HGNC:2093]	vesicle coat protein(PC00235)	NA	NA	ENSG00000070371
ENSG00000070388	ENSG00000070388	2.01805	0.194454	1.05704	0.183961	0.854044	0.923172	ENSG00000070388	27006	FGF22	19	639879	644371	1	protein_coding	fibroblast growth factor 22 [Source:HGNC Symbol;Acc:HGNC:3679]	growth factor(PC00112)	NA	NA	ENSG00000070388
ENSG00000070404	ENSG00000070404	1977.57	0.201714	0.199664	1.01027	0.312367	0.510551	ENSG00000070404	10272	FSTL3	19	676365	683399	1	protein_coding	follistatin like 3 [Source:HGNC Symbol;Acc:HGNC:3973]	protease inhibitor(PC00191)	NA	NA	ENSG00000070404
ENSG00000070413	ENSG00000070413	1486.36	-0.948619	0.210823	-4.49959	6.80842e-06	0.000110402	ENSG00000070413	9993	DGCR2	22	19036282	19122454	-1	protein_coding	DiGeorge syndrome critical region gene 2 [Source:HGNC Symbol;Acc:HGNC:2845]	NA	NA	NA	ENSG00000070413
ENSG00000070423	ENSG00000070423	365.993	0.189507	0.22946	0.82588	0.408872	0.604647	ENSG00000070423	55658	RNF126	19	647526	663277	-1	protein_coding	ring finger protein 126 [Source:HGNC Symbol;Acc:HGNC:21151]	NA	NA	NA	ENSG00000070423
ENSG00000070444	ENSG00000070444	483.25	-0.231075	0.269162	-0.8585	0.390616	0.588327	ENSG00000070444	4335	MNT	17	2384060	2401118	-1	protein_coding	MAX network transcriptional repressor [Source:HGNC Symbol;Acc:HGNC:7188]	basic helix-loop-helix transcription factor(PC00055)	NA	NA	ENSG00000070444
ENSG00000070476	ENSG00000070476	503.988	-0.0496672	0.200673	-0.247503	0.804519	0.895511	ENSG00000070476	79364	ZXDC	3	126437601	126475919	-1	protein_coding	ZXD family zinc finger C [Source:HGNC Symbol;Acc:HGNC:28160]	C2H2 zinc finger transcription factor(PC00248)	NA	NA	ENSG00000070476
ENSG00000070495	ENSG00000070495	832.637	0.591666	0.0981839	6.02611	1.67958e-09	6.67605e-08	ENSG00000070495	23210	JMJD6	17	76712832	76726799	-1	protein_coding	arginine demethylase and lysine hydroxylase [Source:HGNC Symbol;Acc:HGNC:19355]	receptor(PC00197)	NA	NA	ENSG00000070495
ENSG00000070501	ENSG00000070501	455.403	-0.0518328	0.123139	-0.420927	0.673808	0.81226	ENSG00000070501	5423	POLB	8	42338454	42371808	1	protein_coding	DNA polymerase beta [Source:HGNC Symbol;Acc:HGNC:9174]	DNA-directed DNA polymerase(PC00018)	NA	NA	ENSG00000070501
ENSG00000070526	ENSG00000070526	0.465652	-1.44068	3.35419	-0.429517	0.667547	NA	ENSG00000070526	55808	ST6GALNAC1	17	76624761	76643838	-1	protein_coding	ST6 N-acetylgalactosaminide alpha-2,6-sialyltransferase 1 [Source:HGNC Symbol;Acc:HGNC:23614]	NA	NA	NA	ENSG00000070526
ENSG00000070540	ENSG00000070540	735.515	-0.282698	0.402649	-0.702095	0.48262	0.66692	ENSG00000070540	55062	WIPI1	17	68420948	68457513	-1	protein_coding	WD repeat domain, phosphoinositide interacting 1 [Source:HGNC Symbol;Acc:HGNC:25471]	NA	NA	NA	ENSG00000070540
ENSG00000070601	ENSG00000070601	44.9754	0.538718	0.358167	1.5041	0.132556	0.290207	ENSG00000070601	22844	FRMPD1	9	37651000	37746904	1	protein_coding	FERM and PDZ domain containing 1 [Source:HGNC Symbol;Acc:HGNC:29159]	NA	NA	NA	ENSG00000070601
ENSG00000070610	ENSG00000070610	2069	0.908332	0.231777	3.91898	8.89236e-05	0.00100044	ENSG00000070610	57704	GBA2	9	35736866	35749228	-1	protein_coding	glucosylceramidase beta 2 [Source:HGNC Symbol;Acc:HGNC:18986]	NA	NA	NA	ENSG00000070610
ENSG00000070614	ENSG00000070614	6822.49	-1.00981	0.31436	-3.21226	0.00131694	0.00897849	ENSG00000070614	3340	NDST1	5	150485818	150558211	1	protein_coding	N-deacetylase and N-sulfotransferase 1 [Source:HGNC Symbol;Acc:HGNC:7680]	NA	NA	NA	ENSG00000070614
ENSG00000070669	ENSG00000070669	2471.46	0.746777	0.289509	2.57946	0.00989547	0.0438488	ENSG00000070669	440	ASNS	7	97852118	97872542	-1	protein_coding	asparagine synthetase (glutamine-hydrolyzing) [Source:HGNC Symbol;Acc:HGNC:753]	cysteine protease(PC00081)	ligase(PC00142)	NA	ENSG00000070669
ENSG00000070718	ENSG00000070718	767.681	-0.556984	0.188193	-2.95965	0.00307992	0.01769	ENSG00000070718	10947	AP3M2	8	42152946	42171673	1	protein_coding	adaptor related protein complex 3 mu 2 subunit [Source:HGNC Symbol;Acc:HGNC:570]	extracellular matrix glycoprotein(PC00100)	receptor(PC00197)	NA	ENSG00000070718
ENSG00000070729	ENSG00000070729	11.8881	1.43761	0.578018	2.48713	0.0128778	0.0537479	ENSG00000070729	1258	CNGB1	16	57882340	57971116	-1	protein_coding	cyclic nucleotide gated channel beta 1 [Source:HGNC Symbol;Acc:HGNC:2151]	NA	NA	NA	ENSG00000070729
ENSG00000070731	ENSG00000070731	1.40355	0.697666	2.15652	0.323515	0.746305	NA	ENSG00000070731	10610	ST6GALNAC2	17	76565379	76586956	-1	protein_coding	ST6 N-acetylgalactosaminide alpha-2,6-sialyltransferase 2 [Source:HGNC Symbol;Acc:HGNC:10867]	NA	NA	NA	ENSG00000070731
ENSG00000070748	ENSG00000070748	9.41832	1.26793	0.9415	1.34671	0.178072	0.35346	ENSG00000070748	1103	CHAT	10	49609095	49665104	1	protein_coding	choline O-acetyltransferase [Source:HGNC Symbol;Acc:HGNC:1912]	acetyltransferase(PC00038)	acyltransferase(PC00042)	NA	ENSG00000070748
ENSG00000070756	ENSG00000070756	34789.3	0.0777726	0.134503	0.578222	0.563115	0.732314	ENSG00000070756	26986	PABPC1	8	100685816	100722809	-1	protein_coding	poly(A) binding protein cytoplasmic 1 [Source:HGNC Symbol;Acc:HGNC:8554]	NA	NA	NA	ENSG00000070756
ENSG00000070759	ENSG00000070759	175.677	0.441352	0.279462	1.57929	0.11427	0.261684	ENSG00000070759	10420	TESK2	1	45343883	45491166	-1	protein_coding	testis-specific kinase 2 [Source:HGNC Symbol;Acc:HGNC:11732]	NA	NA	NA	ENSG00000070759
ENSG00000070761	ENSG00000070761	1227.43	-0.0660422	0.145634	-0.453479	0.650204	0.795971	ENSG00000070761	29105	CFAP20	16	58113588	58129450	-1	protein_coding	cilia and flagella associated protein 20 [Source:HGNC Symbol;Acc:HGNC:29523]	nuclease(PC00170)	transcription factor(PC00218)	NA	ENSG00000070761
ENSG00000070770	ENSG00000070770	2578.19	-0.0549759	0.257784	-0.213263	0.831122	0.909894	ENSG00000070770	1459	CSNK2A2	16	58157907	58197920	-1	protein_coding	casein kinase 2 alpha 2 [Source:HGNC Symbol;Acc:HGNC:2459]	NA	NA	NA	ENSG00000070770
ENSG00000070778	ENSG00000070778	1340.21	-1.40037	0.194008	-7.21811	5.27134e-13	3.99058e-11	ENSG00000070778	11099	PTPN21	14	88465778	88554733	-1	protein_coding	protein tyrosine phosphatase, non-receptor type 21 [Source:HGNC Symbol;Acc:HGNC:9651]	NA	NA	NA	ENSG00000070778
ENSG00000070785	ENSG00000070785	730.49	0.778059	0.107793	7.21809	5.27236e-13	3.99058e-11	ENSG00000070785	8891	EIF2B3	1	44850522	44986722	-1	protein_coding	eukaryotic translation initiation factor 2B subunit gamma [Source:HGNC Symbol;Acc:HGNC:3259]	NA	NA	NA	ENSG00000070785
ENSG00000070808	ENSG00000070808	15.0859	1.72111	0.529387	3.25113	0.00114947	0.00806481	ENSG00000070808	815	CAMK2A	5	150219491	150290291	-1	protein_coding	calcium/calmodulin dependent protein kinase II alpha [Source:HGNC Symbol;Acc:HGNC:1460]	NA	NA	NA	ENSG00000070808
ENSG00000070814	ENSG00000070814	3689.56	0.282418	0.222853	1.26728	0.205054	0.389461	ENSG00000070814	6949	TCOF1	5	150357639	150400308	1	protein_coding	treacle ribosome biogenesis factor 1 [Source:HGNC Symbol;Acc:HGNC:11654]	NA	NA	NA	ENSG00000070814
ENSG00000070831	ENSG00000070831	6898.46	-0.473703	0.233927	-2.02501	0.0428668	0.13177	ENSG00000070831	998	CDC42	1	22052627	22092946	1	protein_coding	cell division cycle 42 [Source:HGNC Symbol;Acc:HGNC:1736]	small GTPase(PC00208)	NA	NA	ENSG00000070831
ENSG00000070882	ENSG00000070882	2837.94	0.647868	0.208375	3.10914	0.00187631	0.011888	ENSG00000070882	26031	OSBPL3	7	24796539	24981634	-1	protein_coding	oxysterol binding protein like 3 [Source:HGNC Symbol;Acc:HGNC:16370]	NA	NA	NA	ENSG00000070882
ENSG00000070886	ENSG00000070886	19.8624	0.418357	0.470881	0.888457	0.374295	0.572482	ENSG00000070886	2046	EPHA8	1	22563564	22603594	1	protein_coding	EPH receptor A8 [Source:HGNC Symbol;Acc:HGNC:3391]	NA	NA	NA	ENSG00000070886
ENSG00000070915	ENSG00000070915	3.33664	-0.902924	1.16745	-0.773417	0.439276	0.630637	ENSG00000070915	6559	SLC12A3	16	56865207	56915850	1	protein_coding	solute carrier family 12 member 3 [Source:HGNC Symbol;Acc:HGNC:10912]	NA	NA	NA	ENSG00000070915
ENSG00000070950	ENSG00000070950	677.533	-0.143777	0.218057	-0.659352	0.50967	0.689891	ENSG00000070950	56852	RAD18	3	8775402	8963773	-1	protein_coding	RAD18, E3 ubiquitin protein ligase [Source:HGNC Symbol;Acc:HGNC:18278]	NA	NA	NA	ENSG00000070950
ENSG00000070961	ENSG00000070961	1877.52	-0.157696	0.0965109	-1.63397	0.102265	0.242566	ENSG00000070961	490	ATP2B1	12	89588049	89709300	-1	protein_coding	ATPase plasma membrane Ca2+ transporting 1 [Source:HGNC Symbol;Acc:HGNC:814]	cation transporter(PC00068)	hydrolase(PC00121)	ion channel(PC00133)	ENSG00000070961
ENSG00000070985	ENSG00000070985	0.430806	-2.30913	2.38163	-0.96956	0.332266	NA	ENSG00000070985	29850	TRPM5	11	2404515	2423045	-1	protein_coding	transient receptor potential cation channel subfamily M member 5 [Source:HGNC Symbol;Acc:HGNC:14323]	ion channel(PC00133)	receptor(PC00197)	NA	ENSG00000070985
ENSG00000071051	ENSG00000071051	1519.12	-0.524136	0.256613	-2.04251	0.0411008	0.127645	ENSG00000071051	8440	NCK2	2	105744897	105894274	1	protein_coding	NCK adaptor protein 2 [Source:HGNC Symbol;Acc:HGNC:7665]	NA	NA	NA	ENSG00000071051
ENSG00000071054	ENSG00000071054	8015.78	0.104525	0.140485	0.744033	0.456857	0.645647	ENSG00000071054	9448	MAP4K4	2	101696850	101894689	1	protein_coding	mitogen-activated protein kinase kinase kinase kinase 4 [Source:HGNC Symbol;Acc:HGNC:6866]	NA	NA	NA	ENSG00000071054
ENSG00000071073	ENSG00000071073	258.502	-0.0212047	0.355502	-0.0596471	0.952437	0.976541	ENSG00000071073	11320	MGAT4A	2	98619106	98731126	-1	protein_coding	mannosyl (alpha-1,3-)-glycoprotein beta-1,4-N-acetylglucosaminyltransferase, isozyme A [Source:HGNC Symbol;Acc:HGNC:7047]	NA	NA	NA	ENSG00000071073
ENSG00000071082	ENSG00000071082	15021.1	0.210476	0.125159	1.68168	0.0926317	0.225746	ENSG00000071082	6160	RPL31	2	101001715	101024032	1	protein_coding	ribosomal protein L31 [Source:HGNC Symbol;Acc:HGNC:10334]	ribosomal protein(PC00202)	NA	NA	ENSG00000071082
ENSG00000071127	ENSG00000071127	4945.84	0.0365214	0.311277	0.117328	0.9066	0.951385	ENSG00000071127	9948	WDR1	4	10074339	10116949	-1	protein_coding	WD repeat domain 1 [Source:HGNC Symbol;Acc:HGNC:12754]	non-motor actin binding protein(PC00165)	NA	NA	ENSG00000071127
ENSG00000071189	ENSG00000071189	1810.77	-0.866914	0.158159	-5.48128	4.22264e-08	1.24706e-06	ENSG00000071189	23161	SNX13	7	17790761	17940501	-1	protein_coding	sorting nexin 13 [Source:HGNC Symbol;Acc:HGNC:21335]	G-protein modulator(PC00022)	NA	NA	ENSG00000071189
ENSG00000071203	ENSG00000071203	0.784705	-0.3322	1.84124	-0.180423	0.856821	NA	ENSG00000071203	54860	MS4A12	11	60492778	60507430	1	protein_coding	membrane spanning 4-domains A12 [Source:HGNC Symbol;Acc:HGNC:13370]	receptor(PC00197)	NA	NA	ENSG00000071203
ENSG00000071205	ENSG00000071205	306.769	-0.250818	0.184401	-1.36017	0.173775	0.34733	ENSG00000071205	79658	ARHGAP10	4	147732063	148072780	1	protein_coding	Rho GTPase activating protein 10 [Source:HGNC Symbol;Acc:HGNC:26099]	G-protein modulator(PC00022)	NA	NA	ENSG00000071205
ENSG00000071242	ENSG00000071242	275.698	-0.205759	0.461808	-0.445551	0.655922	0.799696	ENSG00000071242	6196	RPS6KA2	6	166409364	166906451	-1	protein_coding	ribosomal protein S6 kinase A2 [Source:HGNC Symbol;Acc:HGNC:10431]	NA	NA	NA	ENSG00000071242
ENSG00000071243	ENSG00000071243	234.572	-0.45235	0.267629	-1.69021	0.0909871	0.223003	ENSG00000071243	54556	ING3	7	120950749	120977216	1	protein_coding	inhibitor of growth family member 3 [Source:HGNC Symbol;Acc:HGNC:14587]	NA	NA	NA	ENSG00000071243
ENSG00000071246	ENSG00000071246	822.173	-0.309324	0.388241	-0.796731	0.425607	0.619427	ENSG00000071246	22846	VASH1	14	76762189	76783015	1	protein_coding	vasohibin 1 [Source:HGNC Symbol;Acc:HGNC:19964]	NA	NA	NA	ENSG00000071246
ENSG00000071282	ENSG00000071282	784.583	-1.92155	0.442696	-4.34056	1.42118e-05	0.000208154	ENSG00000071282	29995	LMCD1	3	8501707	8574673	1	protein_coding	LIM and cysteine rich domains 1 [Source:HGNC Symbol;Acc:HGNC:6633]	actin family cytoskeletal protein(PC00041)	structural protein(PC00211)	NA	ENSG00000071282
ENSG00000071462	ENSG00000071462	1982.21	0.8161	0.145173	5.62157	1.89235e-08	6.04022e-07	ENSG00000071462	114049	BUD23	7	73683025	73705161	1	protein_coding	BUD23, rRNA methyltransferase and ribosome maturation factor [Source:HGNC Symbol;Acc:HGNC:16405]	methyltransferase(PC00155)	NA	NA	ENSG00000071462
ENSG00000071537	ENSG00000071537	6538.71	-1.71925	0.332179	-5.17567	2.27094e-07	5.57913e-06	ENSG00000071537	6400	SEL1L	14	81471549	81533861	-1	protein_coding	SEL1L ERAD E3 ligase adaptor subunit [Source:HGNC Symbol;Acc:HGNC:10717]	NA	NA	NA	ENSG00000071537
ENSG00000071539	ENSG00000071539	1359.43	-0.716624	0.266045	-2.69362	0.00706797	0.0339886	ENSG00000071539	9319	TRIP13	5	892643	919357	1	protein_coding	thyroid hormone receptor interactor 13 [Source:HGNC Symbol;Acc:HGNC:12307]	NA	NA	NA	ENSG00000071539
ENSG00000071553	ENSG00000071553	2790.37	0.355175	0.113498	3.12934	0.00175202	0.0112585	ENSG00000071553	537	ATP6AP1	X	154428632	154436516	1	protein_coding	ATPase H+ transporting accessory protein 1 [Source:HGNC Symbol;Acc:HGNC:868]	ATP synthase(PC00002)	hydrolase(PC00121)	NA	ENSG00000071553
ENSG00000071564	ENSG00000071564	2411.49	-0.205752	0.111926	-1.83829	0.0660193	0.179189	ENSG00000071564	6929	TCF3	19	1609290	1652605	-1	protein_coding	transcription factor 3 [Source:HGNC Symbol;Acc:HGNC:11633]	basic helix-loop-helix transcription factor(PC00055)	nucleic acid binding(PC00171)	NA	ENSG00000071564
ENSG00000071575	ENSG00000071575	2048.57	-0.271723	0.264492	-1.02734	0.304262	0.502797	ENSG00000071575	28951	TRIB2	2	12716889	12742734	1	protein_coding	tribbles pseudokinase 2 [Source:HGNC Symbol;Acc:HGNC:30809]	protein kinase(PC00193)	NA	NA	ENSG00000071575
ENSG00000071626	ENSG00000071626	2650.56	0.0327282	0.157411	0.207915	0.835295	0.912307	ENSG00000071626	26528	DAZAP1	19	1407569	1435687	1	protein_coding	DAZ associated protein 1 [Source:HGNC Symbol;Acc:HGNC:2683]	NA	NA	NA	ENSG00000071626
ENSG00000071655	ENSG00000071655	1179.17	-0.183223	0.36125	-0.507191	0.612021	0.768217	ENSG00000071655	53615	MBD3	19	1573596	1592801	-1	protein_coding	methyl-CpG binding domain protein 3 [Source:HGNC Symbol;Acc:HGNC:6918]	NA	NA	NA	ENSG00000071655
ENSG00000071677	ENSG00000071677	0	NA	NA	NA	NA	NA	ENSG00000071677	51052	PRLH	2	237566574	237567175	1	protein_coding	prolactin releasing hormone [Source:HGNC Symbol;Acc:HGNC:17945]	NA	NA	NA	ENSG00000071677
ENSG00000071794	ENSG00000071794	1595.43	-0.910082	0.198192	-4.59191	4.392e-06	7.53767e-05	ENSG00000071794	6596	HLTF	3	149030127	149086554	-1	protein_coding	helicase like transcription factor [Source:HGNC Symbol;Acc:HGNC:11099]	NA	NA	NA	ENSG00000071794
ENSG00000071859	ENSG00000071859	1756.13	0.520817	0.104653	4.97659	6.47135e-07	1.39587e-05	ENSG00000071859	9130	FAM50A	X	154444126	154450654	1	protein_coding	family with sequence similarity 50 member A [Source:HGNC Symbol;Acc:HGNC:18786]	NA	NA	NA	ENSG00000071859
ENSG00000071889	ENSG00000071889	442.392	0.353402	0.178029	1.98508	0.0471352	0.140911	ENSG00000071889	60343	FAM3A	X	154506159	154516242	-1	protein_coding	family with sequence similarity 3 member A [Source:HGNC Symbol;Acc:HGNC:13749]	NA	NA	NA	ENSG00000071889
ENSG00000071894	ENSG00000071894	5368.46	1.1999	0.368461	3.25651	0.00112792	0.00796028	ENSG00000071894	29894	CPSF1	8	144393229	144409349	-1	protein_coding	cleavage and polyadenylation specific factor 1 [Source:HGNC Symbol;Acc:HGNC:2324]	damaged DNA-binding protein(PC00086)	mRNA polyadenylation factor(PC00146)	NA	ENSG00000071894
ENSG00000071909	ENSG00000071909	7.89308	-0.428346	0.581992	-0.736	0.461731	0.649594	ENSG00000071909	140469	MYO3B	2	170178145	170655171	1	protein_coding	myosin IIIB [Source:HGNC Symbol;Acc:HGNC:15576]	NA	NA	NA	ENSG00000071909
ENSG00000071967	ENSG00000071967	1128.76	-0.44855	0.137245	-3.26824	0.00108217	0.0076976	ENSG00000071967	79901	CYBRD1	2	171522247	171558133	1	protein_coding	cytochrome b reductase 1 [Source:HGNC Symbol;Acc:HGNC:20797]	reductase(PC00198)	NA	NA	ENSG00000071967
ENSG00000071991	ENSG00000071991	0.459553	-1.18313	4.13168	-0.286356	0.774606	NA	ENSG00000071991	28513	CDH19	18	66501083	66604138	-1	protein_coding	cadherin 19 [Source:HGNC Symbol;Acc:HGNC:1758]	NA	NA	NA	ENSG00000071991
ENSG00000071994	ENSG00000071994	1774.84	0.0266184	0.133309	0.199675	0.841735	0.916635	ENSG00000071994	5134	PDCD2	6	170575295	170584692	-1	protein_coding	programmed cell death 2 [Source:HGNC Symbol;Acc:HGNC:8762]	NA	NA	NA	ENSG00000071994
ENSG00000072041	ENSG00000072041	405.521	0.389559	0.437082	0.891271	0.372784	0.571185	ENSG00000072041	55117	SLC6A15	12	84859488	84913615	-1	protein_coding	solute carrier family 6 member 15 [Source:HGNC Symbol;Acc:HGNC:13621]	cation transporter(PC00068)	NA	NA	ENSG00000072041
ENSG00000072042	ENSG00000072042	4441.53	-0.356214	0.136813	-2.60365	0.00922365	0.0415714	ENSG00000072042	51109	RDH11	14	67676801	67695814	-1	protein_coding	retinol dehydrogenase 11 (all-trans/9-cis/11-cis) [Source:HGNC Symbol;Acc:HGNC:17964]	dehydrogenase(PC00092)	reductase(PC00198)	NA	ENSG00000072042
ENSG00000072062	ENSG00000072062	1475.38	-0.42474	0.320701	-1.32441	0.185366	0.363317	ENSG00000072062	5566	PRKACA	19	14091688	14118084	-1	protein_coding	protein kinase cAMP-activated catalytic subunit alpha [Source:HGNC Symbol;Acc:HGNC:9380]	NA	NA	NA	ENSG00000072062
ENSG00000072071	ENSG00000072071	1677.97	-0.290359	0.0944173	-3.07527	0.00210309	0.0130184	ENSG00000072071	22859	ADGRL1	19	14147743	14206187	-1	protein_coding	adhesion G protein-coupled receptor L1 [Source:HGNC Symbol;Acc:HGNC:20973]	G-protein coupled receptor(PC00021)	antibacterial response protein(PC00051)	protease(PC00190)	ENSG00000072071
ENSG00000072080	ENSG00000072080	14.5193	1.06219	0.544511	1.95073	0.0510895	0.14938	ENSG00000072080	6694	SPP2	2	234050679	234077134	1	protein_coding	secreted phosphoprotein 2 [Source:HGNC Symbol;Acc:HGNC:11256]	NA	NA	NA	ENSG00000072080
ENSG00000072110	ENSG00000072110	17460.5	-0.224101	0.172673	-1.29783	0.194345	0.375413	ENSG00000072110	87	ACTN1	14	68874143	68979440	-1	protein_coding	actinin alpha 1 [Source:HGNC Symbol;Acc:HGNC:163]	NA	NA	NA	ENSG00000072110
ENSG00000072121	ENSG00000072121	1801.73	-0.613743	0.221943	-2.76532	0.00568677	0.0287006	ENSG00000072121	23503	ZFYVE26	14	67727374	67816590	-1	protein_coding	zinc finger FYVE-type containing 26 [Source:HGNC Symbol;Acc:HGNC:20761]	NA	NA	NA	ENSG00000072121
ENSG00000072133	ENSG00000072133	468.93	-0.268049	0.316572	-0.846725	0.397149	0.594782	ENSG00000072133	27330	RPS6KA6	X	84058346	84187907	-1	protein_coding	ribosomal protein S6 kinase A6 [Source:HGNC Symbol;Acc:HGNC:10435]	NA	NA	NA	ENSG00000072133
ENSG00000072134	ENSG00000072134	1089.24	0.273775	0.314913	0.869367	0.384646	0.582319	ENSG00000072134	22905	EPN2	17	19215615	19336715	1	protein_coding	epsin 2 [Source:HGNC Symbol;Acc:HGNC:18639]	NA	NA	NA	ENSG00000072134
ENSG00000072135	ENSG00000072135	1029.95	-0.117286	0.140562	-0.834411	0.404049	0.600424	ENSG00000072135	26469	PTPN18	2	130356007	130375409	1	protein_coding	protein tyrosine phosphatase, non-receptor type 18 [Source:HGNC Symbol;Acc:HGNC:9649]	NA	NA	NA	ENSG00000072135
ENSG00000072163	ENSG00000072163	213.213	1.30656	0.297977	4.38478	1.16103e-05	0.000175361	ENSG00000072163	55679	LIMS2	2	127638381	127681786	-1	protein_coding	LIM zinc finger domain containing 2 [Source:HGNC Symbol;Acc:HGNC:16084]	actin family cytoskeletal protein(PC00041)	structural protein(PC00211)	NA	ENSG00000072163
ENSG00000072182	ENSG00000072182	27.4708	-0.429739	0.370196	-1.16084	0.245707	0.437989	ENSG00000072182	55515	ASIC4	2	219514170	219538772	1	protein_coding	acid sensing ion channel subunit family member 4 [Source:HGNC Symbol;Acc:HGNC:21263]	ion channel(PC00133)	NA	NA	ENSG00000072182
ENSG00000072195	ENSG00000072195	2037.84	1.26308	0.280334	4.50563	6.61766e-06	0.000107723	ENSG00000072195	10290	SPEG	2	219434846	219498287	1	protein_coding	SPEG complex locus [Source:HGNC Symbol;Acc:HGNC:16901]	NA	NA	NA	ENSG00000072195
ENSG00000072201	ENSG00000072201	102.969	-0.763316	0.283874	-2.68892	0.00716835	0.0342822	ENSG00000072201	84708	LNX1	4	53459301	53701405	-1	protein_coding	ligand of numb-protein X 1 [Source:HGNC Symbol;Acc:HGNC:6657]	NA	NA	NA	ENSG00000072201
ENSG00000072210	ENSG00000072210	1103.06	0.568779	0.173282	3.28239	0.00102932	0.00740498	ENSG00000072210	224	ALDH3A2	17	19648136	19677598	1	protein_coding	aldehyde dehydrogenase 3 family member A2 [Source:HGNC Symbol;Acc:HGNC:403]	NA	NA	NA	ENSG00000072210
ENSG00000072274	ENSG00000072274	13485.9	-0.522017	0.284469	-1.83506	0.0664972	0.180003	ENSG00000072274	7037	TFRC	3	196027183	196082189	-1	protein_coding	transferrin receptor [Source:HGNC Symbol;Acc:HGNC:11763]	metalloprotease(PC00153)	NA	NA	ENSG00000072274
ENSG00000072310	ENSG00000072310	2116.21	-0.783236	0.192751	-4.06347	4.83485e-05	0.000597677	ENSG00000072310	6720	SREBF1	17	17810399	17837002	-1	protein_coding	sterol regulatory element binding transcription factor 1 [Source:HGNC Symbol;Acc:HGNC:11289]	NA	NA	NA	ENSG00000072310
ENSG00000072315	ENSG00000072315	0.185558	-1.34465	4.31956	-0.311294	0.755578	NA	ENSG00000072315	7224	TRPC5	X	111774315	112082776	-1	protein_coding	transient receptor potential cation channel subfamily C member 5 [Source:HGNC Symbol;Acc:HGNC:12337]	ion channel(PC00133)	NA	NA	ENSG00000072315
ENSG00000072364	ENSG00000072364	6479.25	-0.55807	0.443466	-1.25843	0.208237	0.393381	ENSG00000072364	27125	AFF4	5	132875379	132963634	-1	protein_coding	AF4/FMR2 family member 4 [Source:HGNC Symbol;Acc:HGNC:17869]	transcription factor(PC00218)	NA	NA	ENSG00000072364
ENSG00000072401	ENSG00000072401	888.499	-0.0486234	0.218426	-0.222608	0.82384	0.906785	ENSG00000072401	7321	UBE2D1	10	58334975	58370753	1	protein_coding	ubiquitin conjugating enzyme E2 D1 [Source:HGNC Symbol;Acc:HGNC:12474]	ligase(PC00142)	NA	NA	ENSG00000072401
ENSG00000072415	ENSG00000072415	4410.8	-0.838489	0.258946	-3.23808	0.00120338	0.00836671	ENSG00000072415	64398	MPP5	14	67241109	67335819	1	protein_coding	membrane palmitoylated protein 5 [Source:HGNC Symbol;Acc:HGNC:18669]	cell junction protein(PC00070)	nucleotide kinase(PC00172)	NA	ENSG00000072415
ENSG00000072422	ENSG00000072422	1238.8	-0.370026	0.160329	-2.30792	0.0210035	0.0783832	ENSG00000072422	9886	RHOBTB1	10	60869438	61001440	-1	protein_coding	Rho related BTB domain containing 1 [Source:HGNC Symbol;Acc:HGNC:18738]	small GTPase(PC00208)	NA	NA	ENSG00000072422
ENSG00000072501	ENSG00000072501	6320.49	-1.02683	0.337714	-3.04054	0.00236158	0.0143201	ENSG00000072501	8243	SMC1A	X	53374149	53422728	-1	protein_coding	structural maintenance of chromosomes 1A [Source:HGNC Symbol;Acc:HGNC:11111]	NA	NA	NA	ENSG00000072501
ENSG00000072506	ENSG00000072506	1139.44	0.0325664	0.23506	0.138545	0.88981	0.942465	ENSG00000072506	3028	HSD17B10	X	53431258	53434373	-1	protein_coding	hydroxysteroid 17-beta dehydrogenase 10 [Source:HGNC Symbol;Acc:HGNC:4800]	dehydrogenase(PC00092)	reductase(PC00198)	NA	ENSG00000072506
ENSG00000072518	ENSG00000072518	753.878	-0.126011	0.225278	-0.559358	0.575917	0.741575	ENSG00000072518	2011	MARK2	11	63838928	63911019	1	protein_coding	microtubule affinity regulating kinase 2 [Source:HGNC Symbol;Acc:HGNC:3332]	non-receptor serine/threonine protein kinase(PC00167)	NA	NA	ENSG00000072518
ENSG00000072571	ENSG00000072571	2160.32	-0.287594	0.122046	-2.35645	0.0184506	0.0709957	ENSG00000072571	3161	HMMR	5	163460203	163491945	1	protein_coding	hyaluronan mediated motility receptor [Source:HGNC Symbol;Acc:HGNC:5012]	NA	NA	NA	ENSG00000072571
ENSG00000072609	ENSG00000072609	228.91	0.963184	0.210125	4.58387	4.56456e-06	7.79149e-05	ENSG00000072609	55743	CHFR	12	132822187	132956304	-1	protein_coding	checkpoint with forkhead and ring finger domains [Source:HGNC Symbol;Acc:HGNC:20455]	ubiquitin-protein ligase(PC00234)	NA	NA	ENSG00000072609
ENSG00000072657	ENSG00000072657	261.721	-0.401199	0.396511	-1.01182	0.311623	0.509922	ENSG00000072657	29953	TRHDE	12	72087266	72670757	1	protein_coding	thyrotropin releasing hormone degrading enzyme [Source:HGNC Symbol;Acc:HGNC:30748]	metalloprotease(PC00153)	NA	NA	ENSG00000072657
ENSG00000072682	ENSG00000072682	2918.02	0.0754513	0.31	0.243391	0.807702	0.897086	ENSG00000072682	8974	P4HA2	5	132191838	132295315	-1	protein_coding	prolyl 4-hydroxylase subunit alpha 2 [Source:HGNC Symbol;Acc:HGNC:8547]	NA	NA	NA	ENSG00000072682
ENSG00000072694	ENSG00000072694	0.386273	-0.259664	3.46436	-0.074953	0.940252	NA	ENSG00000072694	2213	FCGR2B	1	161663147	161678654	1	protein_coding	Fc fragment of IgG receptor IIb [Source:HGNC Symbol;Acc:HGNC:3618]	cell adhesion molecule(PC00069)	NA	NA	ENSG00000072694
ENSG00000072736	ENSG00000072736	1158.79	-0.597646	0.271712	-2.19956	0.0278382	0.0962984	ENSG00000072736	4775	NFATC3	16	68084751	68229259	1	protein_coding	nuclear factor of activated T-cells 3 [Source:HGNC Symbol;Acc:HGNC:7777]	Rel homology transcription factor(PC00252)	NA	NA	ENSG00000072736
ENSG00000072756	ENSG00000072756	822.125	0.538717	0.162178	3.32175	0.000894537	0.00661418	ENSG00000072756	51095	TRNT1	3	3126916	3150879	1	protein_coding	tRNA nucleotidyl transferase 1 [Source:HGNC Symbol;Acc:HGNC:17341]	NA	NA	NA	ENSG00000072756
ENSG00000072778	ENSG00000072778	8446.51	1.51081	0.376343	4.01444	5.9586e-05	0.000714579	ENSG00000072778	37	ACADVL	17	7217125	7225273	1	protein_coding	acyl-CoA dehydrogenase, very long chain [Source:HGNC Symbol;Acc:HGNC:92]	dehydrogenase(PC00092)	oxidase(PC00175)	transferase(PC00220)	ENSG00000072778
ENSG00000072786	ENSG00000072786	1053.51	0.715358	0.172114	4.1563	3.23449e-05	0.000419108	ENSG00000072786	6793	STK10	5	172042073	172188386	-1	protein_coding	serine/threonine kinase 10 [Source:HGNC Symbol;Acc:HGNC:11388]	NA	NA	NA	ENSG00000072786
ENSG00000072803	ENSG00000072803	1511.27	-0.280193	0.308523	-0.908173	0.363787	0.562272	ENSG00000072803	23291	FBXW11	5	171861549	172006873	-1	protein_coding	F-box and WD repeat domain containing 11 [Source:HGNC Symbol;Acc:HGNC:13607]	NA	NA	NA	ENSG00000072803
ENSG00000072818	ENSG00000072818	56.9751	0.389823	0.293587	1.3278	0.184245	0.361849	ENSG00000072818	9744	ACAP1	17	7336529	7351478	1	protein_coding	ArfGAP with coiled-coil, ankyrin repeat and PH domains 1 [Source:HGNC Symbol;Acc:HGNC:16467]	NA	NA	NA	ENSG00000072818
ENSG00000072832	ENSG00000072832	1267.18	-0.685285	0.283613	-2.41627	0.0156804	0.0625631	ENSG00000072832	1400	CRMP1	4	5748084	5893058	-1	protein_coding	collapsin response mediator protein 1 [Source:HGNC Symbol;Acc:HGNC:2365]	metalloprotease(PC00153)	NA	NA	ENSG00000072832
ENSG00000072840	ENSG00000072840	285.717	0.0739603	0.227254	0.325452	0.744839	0.858032	ENSG00000072840	2121	EVC	4	5711197	5814305	1	protein_coding	EvC ciliary complex subunit 1 [Source:HGNC Symbol;Acc:HGNC:3497]	NA	NA	NA	ENSG00000072840
ENSG00000072849	ENSG00000072849	762.622	0.281115	0.314252	0.894555	0.371025	0.569542	ENSG00000072849	51009	DERL2	17	5471251	5486811	-1	protein_coding	derlin 2 [Source:HGNC Symbol;Acc:HGNC:17943]	receptor(PC00197)	NA	NA	ENSG00000072849
ENSG00000072858	ENSG00000072858	8.23146	1.50148	0.656085	2.28855	0.0221056	0.0813238	ENSG00000072858	54847	SIDT1	3	113532296	113629578	1	protein_coding	SID1 transmembrane family member 1 [Source:HGNC Symbol;Acc:HGNC:25967]	NA	NA	NA	ENSG00000072858
ENSG00000072864	ENSG00000072864	1061.22	-1.0571	0.23877	-4.42729	9.54252e-06	0.000148727	ENSG00000072864	54820	NDE1	16	15643267	15726353	1	protein_coding	nudE neurodevelopment protein 1 [Source:HGNC Symbol;Acc:HGNC:17619]	NA	NA	NA	ENSG00000072864
ENSG00000072952	ENSG00000072952	4.09951	1.33236	1.01979	1.30651	0.191379	0.371473	ENSG00000072952	10335	MRVI1	11	10573091	10693988	-1	protein_coding	murine retrovirus integration site 1 homolog [Source:HGNC Symbol;Acc:HGNC:7237]	membrane traffic protein(PC00150)	NA	NA	ENSG00000072952
ENSG00000072954	ENSG00000072954	270.309	0.259282	0.29224	0.887222	0.374959	0.573193	ENSG00000072954	79041	TMEM38A	19	16661127	16690029	1	protein_coding	transmembrane protein 38A [Source:HGNC Symbol;Acc:HGNC:28462]	NA	NA	NA	ENSG00000072954
ENSG00000072958	ENSG00000072958	995.484	-0.104273	0.175758	-0.59328	0.552994	0.724712	ENSG00000072958	8907	AP1M1	19	16197578	16245907	1	protein_coding	adaptor related protein complex 1 mu 1 subunit [Source:HGNC Symbol;Acc:HGNC:13667]	extracellular matrix glycoprotein(PC00100)	receptor(PC00197)	NA	ENSG00000072958
ENSG00000073008	ENSG00000073008	1888.57	0.0587902	0.14624	0.402012	0.687675	0.821221	ENSG00000073008	5817	PVR	19	44643798	44663583	1	protein_coding	poliovirus receptor [Source:HGNC Symbol;Acc:HGNC:9705]	NA	NA	NA	ENSG00000073008
ENSG00000073050	ENSG00000073050	977.453	-0.474597	0.133848	-3.5458	0.00039142	0.0033841	ENSG00000073050	NA	XRCC1	19	43543040	43580473	-1	protein_coding	X-ray repair cross complementing 1 [Source:HGNC Symbol;Acc:HGNC:12828]	NA	NA	NA	ENSG00000073050
ENSG00000073060	ENSG00000073060	1742.96	0.545066	0.192771	2.82754	0.00469078	0.0247124	ENSG00000073060	949	SCARB1	12	124776856	124882668	-1	protein_coding	scavenger receptor class B member 1 [Source:HGNC Symbol;Acc:HGNC:1664]	receptor(PC00197)	NA	NA	ENSG00000073060
ENSG00000073067	ENSG00000073067	1.9753	-0.840439	1.17081	-0.717829	0.472863	0.658512	ENSG00000073067	54905	CYP2W1	7	983199	989640	1	protein_coding	cytochrome P450 family 2 subfamily W member 1 [Source:HGNC Symbol;Acc:HGNC:20243]	NA	NA	NA	ENSG00000073067
ENSG00000073111	ENSG00000073111	2472.66	-0.931403	0.329856	-2.82367	0.00474775	0.0249528	ENSG00000073111	4171	MCM2	3	127598223	127622436	1	protein_coding	minichromosome maintenance complex component 2 [Source:HGNC Symbol;Acc:HGNC:6944]	DNA helicase(PC00011)	hydrolase(PC00121)	NA	ENSG00000073111
ENSG00000073146	ENSG00000073146	42.8012	-0.0737981	0.375711	-0.196423	0.844279	0.918074	ENSG00000073146	54456	MOV10L1	22	50089879	50161690	1	protein_coding	Mov10 RISC complex RNA helicase like 1 [Source:HGNC Symbol;Acc:HGNC:7201]	DNA helicase(PC00011)	RNA helicase(PC00032)	endoribonuclease(PC00094)	ENSG00000073146
ENSG00000073150	ENSG00000073150	218.546	-0.0930638	0.21616	-0.430533	0.666808	0.807633	ENSG00000073150	56666	PANX2	22	50170731	50180294	1	protein_coding	pannexin 2 [Source:HGNC Symbol;Acc:HGNC:8600]	NA	NA	NA	ENSG00000073150
ENSG00000073169	ENSG00000073169	396.477	1.0173	0.335174	3.03513	0.00240434	0.0145064	ENSG00000073169	83642	SELENOO	22	50200979	50217616	1	protein_coding	selenoprotein O [Source:HGNC Symbol;Acc:HGNC:30395]	NA	NA	NA	ENSG00000073169
ENSG00000073282	ENSG00000073282	5.2676	-1.72272	0.728416	-2.36502	0.018029	0.0698503	ENSG00000073282	8626	TP63	3	189631416	189897279	1	protein_coding	tumor protein p63 [Source:HGNC Symbol;Acc:HGNC:15979]	P53-like transcription factor(PC00253)	NA	NA	ENSG00000073282
ENSG00000073331	ENSG00000073331	584.45	0.108865	0.335633	0.324356	0.745668	0.858642	ENSG00000073331	80216	ALPK1	4	112285509	112442620	1	protein_coding	alpha kinase 1 [Source:HGNC Symbol;Acc:HGNC:20917]	NA	NA	NA	ENSG00000073331
ENSG00000073350	ENSG00000073350	14.5936	0.632691	0.59795	1.0581	0.290009	0.488112	ENSG00000073350	3993	LLGL2	17	75525080	75575208	1	protein_coding	LLGL2, scribble cell polarity complex component [Source:HGNC Symbol;Acc:HGNC:6629]	membrane trafficking regulatory protein(PC00151)	NA	NA	ENSG00000073350
ENSG00000073417	ENSG00000073417	982.254	0.529057	0.160584	3.29458	0.000985675	0.00715003	ENSG00000073417	5151	PDE8A	15	84980440	85139145	1	protein_coding	phosphodiesterase 8A [Source:HGNC Symbol;Acc:HGNC:8793]	NA	NA	NA	ENSG00000073417
ENSG00000073464	ENSG00000073464	332.603	-0.497665	0.284987	-1.74627	0.0807633	0.205402	ENSG00000073464	1183	CLCN4	X	10156945	10237660	1	protein_coding	chloride voltage-gated channel 4 [Source:HGNC Symbol;Acc:HGNC:2022]	anion channel(PC00049)	NA	NA	ENSG00000073464
ENSG00000073536	ENSG00000073536	706.946	0.0683333	0.262618	0.260201	0.794709	0.88963	ENSG00000073536	54475	NLE1	17	35128753	35142315	-1	protein_coding	notchless homolog 1 [Source:HGNC Symbol;Acc:HGNC:19889]	NA	NA	NA	ENSG00000073536
ENSG00000073578	ENSG00000073578	2763.67	-0.274218	0.111365	-2.46233	0.0138037	0.0567043	ENSG00000073578	6389	SDHA	5	218241	256700	1	protein_coding	succinate dehydrogenase complex flavoprotein subunit A [Source:HGNC Symbol;Acc:HGNC:10680]	dehydrogenase(PC00092)	oxidase(PC00175)	NA	ENSG00000073578
ENSG00000073584	ENSG00000073584	3430.82	-0.683081	0.192192	-3.55416	0.000379183	0.00330088	ENSG00000073584	6605	SMARCE1	17	40624962	40648508	-1	protein_coding	SWI/SNF related, matrix associated, actin dependent regulator of chromatin, subfamily e, member 1 [Source:HGNC Symbol;Acc:HGNC:11109]	NA	NA	NA	ENSG00000073584
ENSG00000073598	ENSG00000073598	0.300329	0.195736	4.32804	0.0452252	0.963928	NA	ENSG00000073598	54752	FNDC8	17	35121579	35130732	1	protein_coding	fibronectin type III domain containing 8 [Source:HGNC Symbol;Acc:HGNC:25286]	NA	NA	NA	ENSG00000073598
ENSG00000073605	ENSG00000073605	478.121	1.42111	0.489357	2.90403	0.00368391	0.0204186	ENSG00000073605	55876	GSDMB	17	39904595	39919854	-1	protein_coding	gasdermin B [Source:HGNC Symbol;Acc:HGNC:23690]	NA	NA	NA	ENSG00000073605
ENSG00000073614	ENSG00000073614	1762.6	-0.626125	0.259201	-2.41559	0.0157096	0.0626673	ENSG00000073614	5927	KDM5A	12	280129	389454	-1	protein_coding	lysine demethylase 5A [Source:HGNC Symbol;Acc:HGNC:9886]	zinc finger transcription factor(PC00244)	NA	NA	ENSG00000073614
ENSG00000073670	ENSG00000073670	208.682	-1.34133	0.282191	-4.75328	2.00144e-06	3.75623e-05	ENSG00000073670	4185	ADAM11	17	44759031	44781846	1	protein_coding	ADAM metallopeptidase domain 11 [Source:HGNC Symbol;Acc:HGNC:189]	metalloprotease(PC00153)	NA	NA	ENSG00000073670
ENSG00000073711	ENSG00000073711	770.484	-0.947865	0.202898	-4.67163	2.98823e-06	5.37287e-05	ENSG00000073711	5523	PPP2R3A	3	135965673	136147891	1	protein_coding	protein phosphatase 2 regulatory subunit B''alpha [Source:HGNC Symbol;Acc:HGNC:9307]	protein phosphatase(PC00195)	NA	NA	ENSG00000073711
ENSG00000073712	ENSG00000073712	3292.16	-0.208614	0.175039	-1.19181	0.233334	0.423726	ENSG00000073712	10979	FERMT2	14	52857268	52952435	-1	protein_coding	fermitin family member 2 [Source:HGNC Symbol;Acc:HGNC:15767]	NA	NA	NA	ENSG00000073712
ENSG00000073734	ENSG00000073734	32.8304	1.44563	0.586319	2.46561	0.013678	0.0563474	ENSG00000073734	8647	ABCB11	2	168922938	169031322	-1	protein_coding	ATP binding cassette subfamily B member 11 [Source:HGNC Symbol;Acc:HGNC:42]	cysteine protease(PC00081)	serine protease(PC00203)	NA	ENSG00000073734
ENSG00000073737	ENSG00000073737	7.1269	1.3357	1.01336	1.31809	0.187475	0.366172	ENSG00000073737	10170	DHRS9	2	169064789	169096167	1	protein_coding	dehydrogenase/reductase 9 [Source:HGNC Symbol;Acc:HGNC:16888]	dehydrogenase(PC00092)	reductase(PC00198)	NA	ENSG00000073737
ENSG00000073754	ENSG00000073754	1.93626	0.640833	1.17771	0.544135	0.586348	0.74916	ENSG00000073754	922	CD5L	1	157830914	157898256	-1	protein_coding	CD5 molecule like [Source:HGNC Symbol;Acc:HGNC:1690]	oxidase(PC00175)	receptor(PC00197)	serine protease(PC00203)	ENSG00000073754
ENSG00000073756	ENSG00000073756	97.3807	-0.800442	0.37976	-2.10776	0.0350521	0.113765	ENSG00000073756	5743	PTGS2	1	186671791	186680427	-1	protein_coding	prostaglandin-endoperoxide synthase 2 [Source:HGNC Symbol;Acc:HGNC:9605]	oxygenase(PC00177)	NA	NA	ENSG00000073756
ENSG00000073792	ENSG00000073792	3347.54	-0.176522	0.225861	-0.78155	0.434479	0.627027	ENSG00000073792	10644	IGF2BP2	3	185643739	185825056	-1	protein_coding	insulin like growth factor 2 mRNA binding protein 2 [Source:HGNC Symbol;Acc:HGNC:28867]	enzyme modulator(PC00095)	mRNA splicing factor(PC00148)	ribonucleoprotein(PC00201)	ENSG00000073792
ENSG00000073803	ENSG00000073803	776.985	-0.467224	0.259621	-1.79964	0.0719178	0.190077	ENSG00000073803	9175	MAP3K13	3	185282941	185489097	1	protein_coding	mitogen-activated protein kinase kinase kinase 13 [Source:HGNC Symbol;Acc:HGNC:6852]	NA	NA	NA	ENSG00000073803
ENSG00000073849	ENSG00000073849	191.794	-1.21699	0.322489	-3.77374	0.000160817	0.00163469	ENSG00000073849	6480	ST6GAL1	3	186930485	187078553	1	protein_coding	ST6 beta-galactoside alpha-2,6-sialyltransferase 1 [Source:HGNC Symbol;Acc:HGNC:10860]	NA	NA	NA	ENSG00000073849
ENSG00000073861	ENSG00000073861	8.28914	0.898062	1.05636	0.850152	0.395241	0.592838	ENSG00000073861	30009	TBX21	17	47733244	47746119	1	protein_coding	T-box 21 [Source:HGNC Symbol;Acc:HGNC:11599]	Rel homology transcription factor(PC00252)	nucleic acid binding(PC00171)	NA	ENSG00000073861
ENSG00000073905	ENSG00000073905	0.489365	1.42908	2.304	0.620258	0.535088	NA	ENSG00000073905	NA	VDAC1P1	X	80929500	80930347	1	processed_pseudogene	voltage dependent anion channel 1 pseudogene 1 [Source:HGNC Symbol;Acc:HGNC:12671]	NA	NA	NA	ENSG00000073905
ENSG00000073910	ENSG00000073910	75.0336	0.530443	0.498651	1.06376	0.287439	0.485597	ENSG00000073910	10129	FRY	13	32031300	32299122	1	protein_coding	FRY microtubule binding protein [Source:HGNC Symbol;Acc:HGNC:20367]	NA	NA	NA	ENSG00000073910
ENSG00000073921	ENSG00000073921	4409.87	0.370081	0.202985	1.82319	0.0682743	0.18338	ENSG00000073921	8301	PICALM	11	85957684	86069882	-1	protein_coding	phosphatidylinositol binding clathrin assembly protein [Source:HGNC Symbol;Acc:HGNC:15514]	vesicle coat protein(PC00235)	NA	NA	ENSG00000073921
ENSG00000073969	ENSG00000073969	1938.57	-0.182918	0.357925	-0.51105	0.609316	0.766267	ENSG00000073969	4905	NSF	17	46590669	46757464	1	protein_coding	N-ethylmaleimide sensitive factor, vesicle fusing ATPase [Source:HGNC Symbol;Acc:HGNC:8016]	hydrolase(PC00121)	NA	NA	ENSG00000073969
ENSG00000074047	ENSG00000074047	1331	-0.983792	0.179003	-5.49594	3.88636e-08	1.15585e-06	ENSG00000074047	2736	GLI2	2	120735623	120992653	1	protein_coding	GLI family zinc finger 2 [Source:HGNC Symbol;Acc:HGNC:4318]	NA	NA	NA	ENSG00000074047
ENSG00000074054	ENSG00000074054	2564.78	-0.897358	0.153137	-5.85983	4.63341e-09	1.69023e-07	ENSG00000074054	23332	CLASP1	2	121337776	121649587	-1	protein_coding	cytoplasmic linker associated protein 1 [Source:HGNC Symbol;Acc:HGNC:17088]	structural protein(PC00211)	NA	NA	ENSG00000074054
ENSG00000074071	ENSG00000074071	1238.02	-0.132832	0.152115	-0.873232	0.382536	0.580324	ENSG00000074071	65993	MRPS34	16	1771890	1773155	-1	protein_coding	mitochondrial ribosomal protein S34 [Source:HGNC Symbol;Acc:HGNC:16618]	NA	NA	NA	ENSG00000074071
ENSG00000074181	ENSG00000074181	1688.41	-0.72201	0.312953	-2.30709	0.02105	0.078499	ENSG00000074181	4854	NOTCH3	19	15159038	15200981	-1	protein_coding	notch 3 [Source:HGNC Symbol;Acc:HGNC:7883]	NA	NA	NA	ENSG00000074181
ENSG00000074201	ENSG00000074201	3193.9	0.442577	0.142492	3.10597	0.00189656	0.0119982	ENSG00000074201	1207	CLNS1A	11	77514936	77637805	-1	protein_coding	chloride nucleotide-sensitive channel 1A [Source:HGNC Symbol;Acc:HGNC:2080]	transporter(PC00227)	NA	NA	ENSG00000074201
ENSG00000074211	ENSG00000074211	1503.12	0.419235	0.223549	1.87536	0.0607431	0.169201	ENSG00000074211	5522	PPP2R2C	4	6320578	6563600	-1	protein_coding	protein phosphatase 2 regulatory subunit Bgamma [Source:HGNC Symbol;Acc:HGNC:9306]	protein phosphatase(PC00195)	NA	NA	ENSG00000074211
ENSG00000074219	ENSG00000074219	945.794	-0.660285	0.294152	-2.2447	0.0247872	0.0884906	ENSG00000074219	8463	TEAD2	19	49340595	49362457	-1	protein_coding	TEA domain transcription factor 2 [Source:HGNC Symbol;Acc:HGNC:11715]	transcription factor(PC00218)	NA	NA	ENSG00000074219
ENSG00000074266	ENSG00000074266	862.618	0.78099	0.289855	2.69442	0.00705119	0.0339489	ENSG00000074266	8726	EED	11	86244544	86278813	1	protein_coding	embryonic ectoderm development [Source:HGNC Symbol;Acc:HGNC:3188]	NA	NA	NA	ENSG00000074266
ENSG00000074276	ENSG00000074276	3.0553	-4.12049	1.51685	-2.71648	0.00659795	0.0322561	ENSG00000074276	54825	CDHR2	5	176542511	176595974	1	protein_coding	cadherin related family member 2 [Source:HGNC Symbol;Acc:HGNC:18231]	NA	NA	NA	ENSG00000074276
ENSG00000074317	ENSG00000074317	36.2047	-0.571315	0.4736	-1.20632	0.227692	0.41656	ENSG00000074317	6620	SNCB	5	176620084	176630556	-1	protein_coding	synuclein beta [Source:HGNC Symbol;Acc:HGNC:11140]	chaperone(PC00072)	membrane traffic protein(PC00150)	NA	ENSG00000074317
ENSG00000074319	ENSG00000074319	1078.89	0.255982	0.268687	0.952714	0.340735	0.539189	ENSG00000074319	7251	TSG101	11	18468336	18527232	-1	protein_coding	tumor susceptibility 101 [Source:HGNC Symbol;Acc:HGNC:15971]	ubiquitin-protein ligase(PC00234)	NA	NA	ENSG00000074319
ENSG00000074356	ENSG00000074356	1058.48	0.30837	0.203419	1.51593	0.129536	0.285524	ENSG00000074356	55421	NCBP3	17	3802165	3846251	-1	protein_coding	nuclear cap binding subunit 3 [Source:HGNC Symbol;Acc:HGNC:24612]	NA	NA	NA	ENSG00000074356
ENSG00000074370	ENSG00000074370	155.573	-1.24663	0.392568	-3.17558	0.00149539	0.00991699	ENSG00000074370	489	ATP2A3	17	3923870	3964464	-1	protein_coding	ATPase sarcoplasmic/endoplasmic reticulum Ca2+ transporting 3 [Source:HGNC Symbol;Acc:HGNC:813]	cation transporter(PC00068)	hydrolase(PC00121)	ion channel(PC00133)	ENSG00000074370
ENSG00000074410	ENSG00000074410	924.901	-0.949838	0.290902	-3.26515	0.00109407	0.00776256	ENSG00000074410	771	CA12	15	63321378	63382161	-1	protein_coding	carbonic anhydrase 12 [Source:HGNC Symbol;Acc:HGNC:1371]	NA	NA	NA	ENSG00000074410
ENSG00000074416	ENSG00000074416	597.018	-0.323909	0.300856	-1.07662	0.281648	0.479433	ENSG00000074416	11343	MGLL	3	127689062	127823250	-1	protein_coding	monoglyceride lipase [Source:HGNC Symbol;Acc:HGNC:17038]	phospholipase(PC00186)	NA	NA	ENSG00000074416
ENSG00000074527	ENSG00000074527	581.486	0.559496	0.223428	2.50414	0.0122749	0.051859	ENSG00000074527	59277	NTN4	12	95657807	95791152	-1	protein_coding	netrin 4 [Source:HGNC Symbol;Acc:HGNC:13658]	extracellular matrix linker protein(PC00101)	protease inhibitor(PC00191)	receptor(PC00197)	ENSG00000074527
ENSG00000074582	ENSG00000074582	581.364	1.01027	0.300296	3.36426	0.000767488	0.00583697	ENSG00000074582	617	BCS1L	2	218658764	218663443	1	protein_coding	BCS1 homolog, ubiquinol-cytochrome c reductase complex chaperone [Source:HGNC Symbol;Acc:HGNC:1020]	NA	NA	NA	ENSG00000074582
ENSG00000074590	ENSG00000074590	1726.11	-0.731221	0.327544	-2.23244	0.0255861	0.0906414	ENSG00000074590	9891	NUAK1	12	106063340	106140033	-1	protein_coding	NUAK family kinase 1 [Source:HGNC Symbol;Acc:HGNC:14311]	non-receptor serine/threonine protein kinase(PC00167)	NA	NA	ENSG00000074590
ENSG00000074603	ENSG00000074603	1257.16	-0.309531	0.124241	-2.49138	0.0127247	0.0532848	ENSG00000074603	54878	DPP8	15	65442463	65517704	-1	protein_coding	dipeptidyl peptidase 8 [Source:HGNC Symbol;Acc:HGNC:16490]	serine protease(PC00203)	NA	NA	ENSG00000074603
ENSG00000074621	ENSG00000074621	489.058	-0.713363	0.211832	-3.36759	0.000758288	0.00578441	ENSG00000074621	9187	SLC24A1	15	65611366	65660995	1	protein_coding	solute carrier family 24 member 1 [Source:HGNC Symbol;Acc:HGNC:10975]	transporter(PC00227)	NA	NA	ENSG00000074621
ENSG00000074657	ENSG00000074657	2644.19	-0.293065	0.14988	-1.95533	0.0505441	0.148266	ENSG00000074657	55205	ZNF532	18	58862600	58986480	1	protein_coding	zinc finger protein 532 [Source:HGNC Symbol;Acc:HGNC:30940]	NA	NA	NA	ENSG00000074657
ENSG00000074660	ENSG00000074660	23.8828	1.91591	0.487736	3.92818	8.55916e-05	0.00096899	ENSG00000074660	8578	SCARF1	17	1633858	1645747	-1	protein_coding	scavenger receptor class F member 1 [Source:HGNC Symbol;Acc:HGNC:16820]	cell adhesion molecule(PC00069)	receptor(PC00197)	NA	ENSG00000074660
ENSG00000074695	ENSG00000074695	5031.23	0.652155	0.204139	3.19466	0.00139994	0.00939238	ENSG00000074695	3998	LMAN1	18	59327823	59359962	-1	protein_coding	lectin, mannose binding 1 [Source:HGNC Symbol;Acc:HGNC:6631]	membrane traffic protein(PC00150)	NA	NA	ENSG00000074695
ENSG00000074696	ENSG00000074696	4487.75	-0.150309	0.0915971	-1.64098	0.100801	0.240243	ENSG00000074696	51495	HACD3	15	65530418	65578352	1	protein_coding	3-hydroxyacyl-CoA dehydratase 3 [Source:HGNC Symbol;Acc:HGNC:24175]	NA	NA	NA	ENSG00000074696
ENSG00000074706	ENSG00000074706	5.85394	-1.55212	1.18599	-1.30871	0.190633	0.370338	ENSG00000074706	26034	IPCEF1	6	154154496	154356792	-1	protein_coding	interaction protein for cytohesin exchange factors 1 [Source:HGNC Symbol;Acc:HGNC:21204]	NA	NA	NA	ENSG00000074706
ENSG00000074755	ENSG00000074755	779.892	-0.323366	0.167204	-1.93397	0.0531173	0.153762	ENSG00000074755	23140	ZZEF1	17	4004445	4143020	-1	protein_coding	zinc finger ZZ-type and EF-hand domain containing 1 [Source:HGNC Symbol;Acc:HGNC:29027]	zinc finger transcription factor(PC00244)	NA	NA	ENSG00000074755
ENSG00000074771	ENSG00000074771	0.055355	-0.525604	4.32804	-0.121442	0.903341	NA	ENSG00000074771	50508	NOX3	6	155395370	155455903	-1	protein_coding	NADPH oxidase 3 [Source:HGNC Symbol;Acc:HGNC:7890]	oxidase(PC00175)	NA	NA	ENSG00000074771
ENSG00000074800	ENSG00000074800	48684.8	-0.0107293	0.159547	-0.0672486	0.946384	0.973663	ENSG00000074800	2023	ENO1	1	8861002	8879249	-1	protein_coding	enolase 1 [Source:HGNC Symbol;Acc:HGNC:3350]	lyase(PC00144)	NA	NA	ENSG00000074800
ENSG00000074803	ENSG00000074803	0.222681	-1.2398	4.3235	-0.286757	0.774298	NA	ENSG00000074803	6557	SLC12A1	15	48191664	48304078	1	protein_coding	solute carrier family 12 member 1 [Source:HGNC Symbol;Acc:HGNC:10910]	NA	NA	NA	ENSG00000074803
ENSG00000074842	ENSG00000074842	1411.26	0.867748	0.0936357	9.26728	1.9096e-20	4.02288e-18	ENSG00000074842	56005	MYDGF	19	4641374	4670370	-1	protein_coding	myeloid derived growth factor [Source:HGNC Symbol;Acc:HGNC:16948]	NA	NA	NA	ENSG00000074842
ENSG00000074855	ENSG00000074855	245.84	0.417283	0.219045	1.90501	0.0567781	0.161384	ENSG00000074855	57719	ANO8	19	17323223	17334829	-1	protein_coding	anoctamin 8 [Source:HGNC Symbol;Acc:HGNC:29329]	NA	NA	NA	ENSG00000074855
ENSG00000074935	ENSG00000074935	352.053	0.517459	0.134234	3.85491	0.000115771	0.00124485	ENSG00000074935	51175	TUBE1	6	112070777	112087529	-1	protein_coding	tubulin epsilon 1 [Source:HGNC Symbol;Acc:HGNC:20775]	tubulin(PC00228)	NA	NA	ENSG00000074935
ENSG00000074964	ENSG00000074964	420.568	0.860134	0.242604	3.54542	0.000391985	0.00338782	ENSG00000074964	55160	ARHGEF10L	1	17539835	17697874	1	protein_coding	Rho guanine nucleotide exchange factor 10 like [Source:HGNC Symbol;Acc:HGNC:25540]	hydrolase(PC00121)	NA	NA	ENSG00000074964
ENSG00000074966	ENSG00000074966	6.95887	-1.21831	0.60283	-2.02099	0.0432812	0.13272	ENSG00000074966	7294	TXK	4	48066393	48134256	-1	protein_coding	TXK tyrosine kinase [Source:HGNC Symbol;Acc:HGNC:12434]	NA	NA	NA	ENSG00000074966
ENSG00000075035	ENSG00000075035	5.21232	-0.20751	1.01669	-0.204103	0.838273	0.914375	ENSG00000075035	9671	WSCD2	12	108129471	108250537	1	protein_coding	WSC domain containing 2 [Source:HGNC Symbol;Acc:HGNC:29117]	NA	NA	NA	ENSG00000075035
ENSG00000075043	ENSG00000075043	17.6947	2.33623	0.913554	2.5573	0.0105488	0.0461293	ENSG00000075043	3785	KCNQ2	20	63400210	63472677	-1	protein_coding	potassium voltage-gated channel subfamily Q member 2 [Source:HGNC Symbol;Acc:HGNC:6296]	NA	NA	NA	ENSG00000075043
ENSG00000075073	ENSG00000075073	1.10166	-0.339728	1.64489	-0.206535	0.836373	NA	ENSG00000075073	6865	TACR2	10	69403903	69416867	-1	protein_coding	tachykinin receptor 2 [Source:HGNC Symbol;Acc:HGNC:11527]	NA	NA	NA	ENSG00000075073
ENSG00000075089	ENSG00000075089	351.872	0.41111	0.181913	2.25993	0.0238255	0.0858355	ENSG00000075089	64431	ACTR6	12	100199122	100241865	1	protein_coding	ARP6 actin related protein 6 homolog [Source:HGNC Symbol;Acc:HGNC:24025]	actin and actin related protein(PC00039)	NA	NA	ENSG00000075089
ENSG00000075131	ENSG00000075131	489.152	-0.202873	0.247096	-0.821032	0.411628	0.60715	ENSG00000075131	54962	TIPIN	15	66336206	66386746	-1	protein_coding	TIMELESS interacting protein [Source:HGNC Symbol;Acc:HGNC:30750]	transcription cofactor(PC00217)	NA	NA	ENSG00000075131
ENSG00000075142	ENSG00000075142	1887.28	-0.0196704	0.167461	-0.117462	0.906494	0.951385	ENSG00000075142	6717	SRI	7	88205118	88226993	-1	protein_coding	sorcin [Source:HGNC Symbol;Acc:HGNC:11292]	NA	NA	NA	ENSG00000075142
ENSG00000075151	ENSG00000075151	1856.99	0.561031	0.0905288	6.19727	5.74507e-10	2.55108e-08	ENSG00000075151	8672	EIF4G3	1	20806292	21176888	-1	protein_coding	eukaryotic translation initiation factor 4 gamma 3 [Source:HGNC Symbol;Acc:HGNC:3298]	translation initiation factor(PC00224)	NA	NA	ENSG00000075151
ENSG00000075188	ENSG00000075188	568.822	-0.023924	0.202214	-0.11831	0.905822	0.95112	ENSG00000075188	79023	NUP37	12	102073103	102120124	-1	protein_coding	nucleoporin 37 [Source:HGNC Symbol;Acc:HGNC:29929]	transfer/carrier protein(PC00219)	NA	NA	ENSG00000075188
ENSG00000075213	ENSG00000075213	440.937	-2.14105	0.772159	-2.77281	0.00555739	0.0282337	ENSG00000075213	10371	SEMA3A	7	83955777	84492724	-1	protein_coding	semaphorin 3A [Source:HGNC Symbol;Acc:HGNC:10723]	membrane-bound signaling molecule(PC00152)	NA	NA	ENSG00000075213
ENSG00000075218	ENSG00000075218	2048.94	-0.36679	0.24371	-1.50503	0.132317	0.289935	ENSG00000075218	51512	GTSE1	22	46296741	46330810	1	protein_coding	G2 and S-phase expressed 1 [Source:HGNC Symbol;Acc:HGNC:13698]	NA	NA	NA	ENSG00000075218
ENSG00000075223	ENSG00000075223	2869.04	-0.409157	0.410049	-0.997823	0.318365	0.516975	ENSG00000075223	10512	SEMA3C	7	80742538	80922359	-1	protein_coding	semaphorin 3C [Source:HGNC Symbol;Acc:HGNC:10725]	membrane-bound signaling molecule(PC00152)	NA	NA	ENSG00000075223
ENSG00000075234	ENSG00000075234	367.802	0.213939	0.144093	1.48473	0.137616	0.297349	ENSG00000075234	55020	TTC38	22	46267961	46294008	1	protein_coding	tetratricopeptide repeat domain 38 [Source:HGNC Symbol;Acc:HGNC:26082]	NA	NA	NA	ENSG00000075234
ENSG00000075239	ENSG00000075239	1315.28	0.967415	0.0898226	10.7703	4.75542e-27	1.90821e-24	ENSG00000075239	38	ACAT1	11	108121516	108147776	1	protein_coding	acetyl-CoA acetyltransferase 1 [Source:HGNC Symbol;Acc:HGNC:93]	acetyltransferase(PC00038)	NA	NA	ENSG00000075239
ENSG00000075240	ENSG00000075240	465.58	0.232915	0.316885	0.735014	0.462331	0.650051	ENSG00000075240	23151	GRAMD4	22	46576012	46679790	1	protein_coding	GRAM domain containing 4 [Source:HGNC Symbol;Acc:HGNC:29113]	NA	NA	NA	ENSG00000075240
ENSG00000075275	ENSG00000075275	22.5744	-0.0154091	0.519764	-0.0296464	0.976349	0.988787	ENSG00000075275	9620	CELSR1	22	46360834	46537170	-1	protein_coding	cadherin EGF LAG seven-pass G-type receptor 1 [Source:HGNC Symbol;Acc:HGNC:1850]	G-protein coupled receptor(PC00021)	cadherin(PC00057)	NA	ENSG00000075275
ENSG00000075290	ENSG00000075290	0.540803	0.638103	2.19674	0.290477	0.771451	NA	ENSG00000075290	7479	WNT8B	10	100463041	100483744	1	protein_coding	Wnt family member 8B [Source:HGNC Symbol;Acc:HGNC:12789]	signaling molecule(PC00207)	NA	NA	ENSG00000075290
ENSG00000075292	ENSG00000075292	5334.54	0.692262	0.33382	2.07376	0.0381016	0.120945	ENSG00000075292	27332	ZNF638	2	71276561	71435069	1	protein_coding	zinc finger protein 638 [Source:HGNC Symbol;Acc:HGNC:17894]	NA	NA	NA	ENSG00000075292
ENSG00000075303	ENSG00000075303	537.236	-0.0583217	0.232562	-0.250779	0.801985	0.894204	ENSG00000075303	55972	SLC25A40	7	87833568	87876357	-1	protein_coding	solute carrier family 25 member 40 [Source:HGNC Symbol;Acc:HGNC:29680]	NA	NA	NA	ENSG00000075303
ENSG00000075336	ENSG00000075336	934.993	1.14745	0.244697	4.68926	2.7419e-06	4.97239e-05	ENSG00000075336	29090	TIMM21	18	74148511	74160530	1	protein_coding	translocase of inner mitochondrial membrane 21 [Source:HGNC Symbol;Acc:HGNC:25010]	NA	NA	NA	ENSG00000075336
ENSG00000075340	ENSG00000075340	250.378	4.13422	0.423076	9.77182	1.48752e-22	3.83721e-20	ENSG00000075340	119	ADD2	2	70607618	70768225	-1	protein_coding	adducin 2 [Source:HGNC Symbol;Acc:HGNC:244]	non-motor actin binding protein(PC00165)	NA	NA	ENSG00000075340
ENSG00000075388	ENSG00000075388	4.02774	0.797648	1.07398	0.742702	0.457662	0.646307	ENSG00000075388	2249	FGF4	11	69771016	69775403	-1	protein_coding	fibroblast growth factor 4 [Source:HGNC Symbol;Acc:HGNC:3682]	growth factor(PC00112)	NA	NA	ENSG00000075388
ENSG00000075391	ENSG00000075391	1713.62	-0.308981	0.126747	-2.43778	0.0147776	0.0598077	ENSG00000075391	9462	RASAL2	1	178094141	178484147	1	protein_coding	RAS protein activator like 2 [Source:HGNC Symbol;Acc:HGNC:9874]	G-protein modulator(PC00022)	NA	NA	ENSG00000075391
ENSG00000075399	ENSG00000075399	553.858	1.08035	0.362298	2.98195	0.00286421	0.0167377	ENSG00000075399	9605	VPS9D1	16	89707134	89720986	-1	protein_coding	VPS9 domain containing 1 [Source:HGNC Symbol;Acc:HGNC:13526]	guanyl-nucleotide exchange factor(PC00113)	membrane trafficking regulatory protein(PC00151)	NA	ENSG00000075399
ENSG00000075407	ENSG00000075407	1254.62	-0.387348	0.104541	-3.70522	0.000211206	0.00204274	ENSG00000075407	7587	ZNF37A	10	38094334	38150293	1	protein_coding	zinc finger protein 37A [Source:HGNC Symbol;Acc:HGNC:13102]	NA	NA	NA	ENSG00000075407
ENSG00000075413	ENSG00000075413	1188.49	0.0393182	0.184547	0.213052	0.831286	0.909894	ENSG00000075413	4140	MARK3	14	103385392	103503831	1	protein_coding	microtubule affinity regulating kinase 3 [Source:HGNC Symbol;Acc:HGNC:6897]	non-receptor serine/threonine protein kinase(PC00167)	NA	NA	ENSG00000075413
ENSG00000075415	ENSG00000075415	7010.62	0.141349	0.182641	0.773917	0.43898	0.630492	ENSG00000075415	5250	SLC25A3	12	98593591	98606379	1	protein_coding	solute carrier family 25 member 3 [Source:HGNC Symbol;Acc:HGNC:10989]	NA	NA	NA	ENSG00000075415
ENSG00000075420	ENSG00000075420	2437.11	-0.569621	0.374491	-1.52105	0.128246	0.283546	ENSG00000075420	64778	FNDC3B	3	172039628	172401665	1	protein_coding	fibronectin type III domain containing 3B [Source:HGNC Symbol;Acc:HGNC:24670]	NA	NA	NA	ENSG00000075420
ENSG00000075426	ENSG00000075426	5683.57	-0.628388	0.168373	-3.73211	0.00018988	0.00187579	ENSG00000075426	2355	FOSL2	2	28392448	28417312	1	protein_coding	FOS like 2, AP-1 transcription factor subunit [Source:HGNC Symbol;Acc:HGNC:3798]	basic leucine zipper transcription factor(PC00056)	NA	NA	ENSG00000075426
ENSG00000075429	ENSG00000075429	2.37818	-0.337809	1.36404	-0.247653	0.804403	0.895474	ENSG00000075429	27091	CACNG5	17	66835117	66885486	1	protein_coding	calcium voltage-gated channel auxiliary subunit gamma 5 [Source:HGNC Symbol;Acc:HGNC:1409]	NA	NA	NA	ENSG00000075429
ENSG00000075461	ENSG00000075461	0.0518477	-0.525604	4.32804	-0.121442	0.903341	NA	ENSG00000075461	27092	CACNG4	17	66964910	67033398	1	protein_coding	calcium voltage-gated channel auxiliary subunit gamma 4 [Source:HGNC Symbol;Acc:HGNC:1408]	voltage-gated calcium channel(PC00240)	NA	NA	ENSG00000075461
ENSG00000075539	ENSG00000075539	2630.27	-0.234735	0.147904	-1.58708	0.112495	0.258982	ENSG00000075539	285527	FRYL	4	48497361	48780322	-1	protein_coding	FRY like transcription coactivator [Source:HGNC Symbol;Acc:HGNC:29127]	NA	NA	NA	ENSG00000075539
ENSG00000075568	ENSG00000075568	2741.77	-0.421683	0.118688	-3.55285	0.000381076	0.00331166	ENSG00000075568	23505	TMEM131	2	97756333	97995891	-1	protein_coding	transmembrane protein 131 [Source:HGNC Symbol;Acc:HGNC:30366]	NA	NA	NA	ENSG00000075568
ENSG00000075618	ENSG00000075618	8467.52	-1.21614	0.234315	-5.19018	2.10094e-07	5.19684e-06	ENSG00000075618	6624	FSCN1	7	5592823	5606655	1	protein_coding	fascin actin-bundling protein 1 [Source:HGNC Symbol;Acc:HGNC:11148]	non-motor actin binding protein(PC00165)	NA	NA	ENSG00000075618
ENSG00000075624	ENSG00000075624	120457	-0.10463	0.29246	-0.357757	0.720525	0.842696	ENSG00000075624	60	ACTB	7	5527151	5563784	-1	protein_coding	actin beta [Source:HGNC Symbol;Acc:HGNC:132]	actin and actin related protein(PC00039)	NA	NA	ENSG00000075624
ENSG00000075643	ENSG00000075643	372.197	0.459392	0.21173	2.1697	0.0300293	0.101693	ENSG00000075643	55034	MOCOS	18	36187519	36272157	1	protein_coding	molybdenum cofactor sulfurase [Source:HGNC Symbol;Acc:HGNC:18234]	NA	NA	NA	ENSG00000075643
ENSG00000075651	ENSG00000075651	756.325	0.421897	0.272233	1.54977	0.121198	0.272563	ENSG00000075651	5337	PLD1	3	171600405	171810950	-1	protein_coding	phospholipase D1 [Source:HGNC Symbol;Acc:HGNC:9067]	NA	NA	NA	ENSG00000075651
ENSG00000075673	ENSG00000075673	3.55741	0.735401	1.08077	0.680439	0.496226	0.677795	ENSG00000075673	479	ATP12A	13	24680411	24712493	1	protein_coding	ATPase H+/K+ transporting non-gastric alpha2 subunit [Source:HGNC Symbol;Acc:HGNC:13816]	cation transporter(PC00068)	hydrolase(PC00121)	ion channel(PC00133)	ENSG00000075673
ENSG00000075702	ENSG00000075702	1248.06	-0.182283	0.233476	-0.780736	0.434958	0.627359	ENSG00000075702	284403	WDR62	19	36054881	36105106	1	protein_coding	WD repeat domain 62 [Source:HGNC Symbol;Acc:HGNC:24502]	NA	NA	NA	ENSG00000075702
ENSG00000075711	ENSG00000075711	2605.9	-0.605432	0.123775	-4.89138	1.00134e-06	2.04804e-05	ENSG00000075711	1739	DLG1	3	197042560	197299300	-1	protein_coding	discs large MAGUK scaffold protein 1 [Source:HGNC Symbol;Acc:HGNC:2900]	transmembrane receptor regulatory/adaptor protein(PC00226)	NA	NA	ENSG00000075711
ENSG00000075785	ENSG00000075785	4049.57	-0.0916395	0.305069	-0.300389	0.76388	0.870566	ENSG00000075785	7879	RAB7A	3	128726122	128814796	1	protein_coding	RAB7A, member RAS oncogene family [Source:HGNC Symbol;Acc:HGNC:9788]	NA	NA	NA	ENSG00000075785
ENSG00000075790	ENSG00000075790	1011.44	0.136679	0.147376	0.927419	0.353709	0.551995	ENSG00000075790	55973	BCAP29	7	107579977	107629170	1	protein_coding	B-cell receptor associated protein 29 [Source:HGNC Symbol;Acc:HGNC:24131]	membrane traffic protein(PC00150)	transporter(PC00227)	NA	ENSG00000075790
ENSG00000075826	ENSG00000075826	466.537	0.573955	0.345412	1.66165	0.0965827	0.232845	ENSG00000075826	25956	SEC31B	10	100486642	100519864	-1	protein_coding	SEC31 homolog B, COPII coat complex component [Source:HGNC Symbol;Acc:HGNC:23197]	vesicle coat protein(PC00235)	NA	NA	ENSG00000075826
ENSG00000075856	ENSG00000075856	1386.07	0.071121	0.109646	0.648644	0.516569	0.695508	ENSG00000075856	9733	SART3	12	108522580	108561400	-1	protein_coding	squamous cell carcinoma antigen recognized by T-cells 3 [Source:HGNC Symbol;Acc:HGNC:16860]	mRNA splicing factor(PC00148)	NA	NA	ENSG00000075856
ENSG00000075884	ENSG00000075884	11.6399	0.603582	0.51974	1.16132	0.245514	0.437916	ENSG00000075884	55843	ARHGAP15	2	143091362	143768352	1	protein_coding	Rho GTPase activating protein 15 [Source:HGNC Symbol;Acc:HGNC:21030]	G-protein modulator(PC00022)	NA	NA	ENSG00000075884
ENSG00000075886	ENSG00000075886	23.9139	-2.25723	0.511584	-4.41224	1.02307e-05	0.000157414	ENSG00000075886	113457	TUBA3D	2	131476093	131482934	1	protein_coding	tubulin alpha 3d [Source:HGNC Symbol;Acc:HGNC:24071]	NA	NA	NA	ENSG00000075886
ENSG00000075891	ENSG00000075891	43.9109	-0.710862	0.342782	-2.0738	0.0380979	0.120945	ENSG00000075891	5076	PAX2	10	100735603	100829941	1	protein_coding	paired box 2 [Source:HGNC Symbol;Acc:HGNC:8616]	NA	NA	NA	ENSG00000075891
ENSG00000075914	ENSG00000075914	672.086	0.52241	0.101553	5.14422	2.68635e-07	6.50489e-06	ENSG00000075914	23016	EXOSC7	3	44975241	45036066	1	protein_coding	exosome component 7 [Source:HGNC Symbol;Acc:HGNC:28112]	exoribonuclease(PC00099)	hydrolase(PC00121)	NA	ENSG00000075914
ENSG00000075945	ENSG00000075945	600.632	0.436526	0.184748	2.36282	0.0181363	0.0701372	ENSG00000075945	22920	KIFAP3	1	169921326	170085208	-1	protein_coding	kinesin associated protein 3 [Source:HGNC Symbol;Acc:HGNC:17060]	microtubule binding motor protein(PC00156)	NA	NA	ENSG00000075945
ENSG00000075975	ENSG00000075975	830.764	0.124066	0.131085	0.946452	0.343918	0.542378	ENSG00000075975	23609	MKRN2	3	12557014	12583713	1	protein_coding	makorin ring finger protein 2 [Source:HGNC Symbol;Acc:HGNC:7113]	ubiquitin-protein ligase(PC00234)	NA	NA	ENSG00000075975
ENSG00000076003	ENSG00000076003	2397.25	-0.821111	0.272723	-3.01078	0.00260574	0.0154695	ENSG00000076003	4175	MCM6	2	135839626	135876426	-1	protein_coding	minichromosome maintenance complex component 6 [Source:HGNC Symbol;Acc:HGNC:6949]	DNA helicase(PC00011)	hydrolase(PC00121)	NA	ENSG00000076003
ENSG00000076043	ENSG00000076043	2836.04	0.991296	0.102212	9.69846	3.06094e-22	7.51268e-20	ENSG00000076043	25996	REXO2	11	114439386	114450279	1	protein_coding	RNA exonuclease 2 [Source:HGNC Symbol;Acc:HGNC:17851]	NA	NA	NA	ENSG00000076043
ENSG00000076053	ENSG00000076053	1477.67	0.0440505	0.270467	0.162868	0.870622	0.93254	ENSG00000076053	10179	RBM7	11	114400030	114414203	1	protein_coding	RNA binding motif protein 7 [Source:HGNC Symbol;Acc:HGNC:9904]	nucleic acid binding(PC00171)	NA	NA	ENSG00000076053
ENSG00000076067	ENSG00000076067	2270.64	-0.0562537	0.350586	-0.160456	0.872522	0.933565	ENSG00000076067	5939	RBMS2	12	56521929	56596196	1	protein_coding	RNA binding motif single stranded interacting protein 2 [Source:HGNC Symbol;Acc:HGNC:9909]	NA	NA	NA	ENSG00000076067
ENSG00000076108	ENSG00000076108	4032.14	-0.0982264	0.314986	-0.311843	0.75516	0.864468	ENSG00000076108	11176	BAZ2A	12	56595596	56636816	-1	protein_coding	bromodomain adjacent to zinc finger domain 2A [Source:HGNC Symbol;Acc:HGNC:962]	NA	NA	NA	ENSG00000076108
ENSG00000076201	ENSG00000076201	1704.82	0.0536882	0.13002	0.412922	0.679664	0.815816	ENSG00000076201	25930	PTPN23	3	47381011	47413441	1	protein_coding	protein tyrosine phosphatase, non-receptor type 23 [Source:HGNC Symbol;Acc:HGNC:14406]	NA	NA	NA	ENSG00000076201
ENSG00000076242	ENSG00000076242	1590.93	-0.661569	0.195317	-3.38715	0.000706236	0.00546652	ENSG00000076242	4292	MLH1	3	36993332	37050918	1	protein_coding	mutL homolog 1 [Source:HGNC Symbol;Acc:HGNC:7127]	DNA binding protein(PC00009)	NA	NA	ENSG00000076242
ENSG00000076248	ENSG00000076248	954.827	-0.750122	0.270573	-2.77235	0.00556533	0.0282626	ENSG00000076248	7374	UNG	12	109097574	109110992	1	protein_coding	uracil DNA glycosylase [Source:HGNC Symbol;Acc:HGNC:12572]	NA	NA	NA	ENSG00000076248
ENSG00000076258	ENSG00000076258	66.1732	-0.0580665	0.401148	-0.144751	0.884908	0.940538	ENSG00000076258	2329	FMO4	1	171314208	171342084	1	protein_coding	flavin containing monooxygenase 4 [Source:HGNC Symbol;Acc:HGNC:3772]	oxygenase(PC00177)	NA	NA	ENSG00000076258
ENSG00000076321	ENSG00000076321	437.702	0.00997613	0.225832	0.044175	0.964765	0.982665	ENSG00000076321	27252	KLHL20	1	173714941	173786702	1	protein_coding	kelch like family member 20 [Source:HGNC Symbol;Acc:HGNC:25056]	NA	NA	NA	ENSG00000076321
ENSG00000076344	ENSG00000076344	1.6242	1.26461	1.22929	1.02874	0.303604	NA	ENSG00000076344	8786	RGS11	16	268301	275980	-1	protein_coding	regulator of G protein signaling 11 [Source:HGNC Symbol;Acc:HGNC:9993]	NA	NA	NA	ENSG00000076344
ENSG00000076351	ENSG00000076351	544.522	0.438937	0.178563	2.45816	0.0139652	0.0572002	ENSG00000076351	113235	SLC46A1	17	28394756	28407197	-1	protein_coding	solute carrier family 46 member 1 [Source:HGNC Symbol;Acc:HGNC:30521]	NA	NA	NA	ENSG00000076351
ENSG00000076356	ENSG00000076356	443.102	0.424063	0.309966	1.3681	0.171282	0.344527	ENSG00000076356	5362	PLXNA2	1	208022242	208244320	-1	protein_coding	plexin A2 [Source:HGNC Symbol;Acc:HGNC:9100]	NA	NA	NA	ENSG00000076356
ENSG00000076382	ENSG00000076382	5134.45	0.148789	0.298383	0.498652	0.618025	0.77276	ENSG00000076382	10615	SPAG5	17	28577565	28599279	-1	protein_coding	sperm associated antigen 5 [Source:HGNC Symbol;Acc:HGNC:13452]	NA	NA	NA	ENSG00000076382
ENSG00000076513	ENSG00000076513	848.857	0.448637	0.183334	2.44711	0.0144008	0.0585765	ENSG00000076513	88455	ANKRD13A	12	109999186	110039763	1	protein_coding	ankyrin repeat domain 13A [Source:HGNC Symbol;Acc:HGNC:21268]	NA	NA	NA	ENSG00000076513
ENSG00000076554	ENSG00000076554	1814.9	-0.123817	0.349786	-0.35398	0.723354	0.844844	ENSG00000076554	7163	TPD52	8	80034745	80231232	-1	protein_coding	tumor protein D52 [Source:HGNC Symbol;Acc:HGNC:12005]	NA	NA	NA	ENSG00000076554
ENSG00000076555	ENSG00000076555	112.715	0.138531	0.250675	0.552632	0.580515	0.744458	ENSG00000076555	32	ACACB	12	109116595	109268226	1	protein_coding	acetyl-CoA carboxylase beta [Source:HGNC Symbol;Acc:HGNC:85]	NA	NA	NA	ENSG00000076555
ENSG00000076604	ENSG00000076604	1848.02	0.38218	0.131268	2.91145	0.0035975	0.020077	ENSG00000076604	9618	TRAF4	17	28743984	28750958	1	protein_coding	TNF receptor associated factor 4 [Source:HGNC Symbol;Acc:HGNC:12034]	signaling molecule(PC00207)	NA	NA	ENSG00000076604
ENSG00000076641	ENSG00000076641	110.524	0.467737	0.555698	0.84171	0.39995	0.597173	ENSG00000076641	55824	PAG1	8	80967810	81112068	-1	protein_coding	phosphoprotein membrane anchor with glycosphingolipid microdomains 1 [Source:HGNC Symbol;Acc:HGNC:30043]	NA	NA	NA	ENSG00000076641
ENSG00000076650	ENSG00000076650	285.929	0.151393	0.166942	0.906857	0.364482	0.562935	ENSG00000076650	55094	GPATCH1	19	33080880	33130542	1	protein_coding	G-patch domain containing 1 [Source:HGNC Symbol;Acc:HGNC:24658]	NA	NA	NA	ENSG00000076650
ENSG00000076662	ENSG00000076662	48.8373	0.556787	0.268255	2.07559	0.0379317	0.120573	ENSG00000076662	3385	ICAM3	19	10333776	10339823	-1	protein_coding	intercellular adhesion molecule 3 [Source:HGNC Symbol;Acc:HGNC:5346]	NA	NA	NA	ENSG00000076662
ENSG00000076685	ENSG00000076685	1537.86	0.00238507	0.107239	0.0222406	0.982256	0.992503	ENSG00000076685	22978	NT5C2	10	103088017	103193306	-1	protein_coding	5'-nucleotidase, cytosolic II [Source:HGNC Symbol;Acc:HGNC:8022]	nucleotide phosphatase(PC00173)	NA	NA	ENSG00000076685
ENSG00000076706	ENSG00000076706	5911.18	0.283837	0.198099	1.4328	0.151914	0.31849	ENSG00000076706	4162	MCAM	11	119308529	119321521	-1	protein_coding	melanoma cell adhesion molecule [Source:HGNC Symbol;Acc:HGNC:6934]	immunoglobulin superfamily cell adhesion molecule(PC00125)	receptor(PC00197)	NA	ENSG00000076706
ENSG00000076716	ENSG00000076716	803.943	-0.793299	0.14506	-5.46875	4.5321e-08	1.3276e-06	ENSG00000076716	2239	GPC4	X	133300103	133415490	-1	protein_coding	glypican 4 [Source:HGNC Symbol;Acc:HGNC:4452]	NA	NA	NA	ENSG00000076716
ENSG00000076770	ENSG00000076770	96.06	-2.38185	0.288451	-8.25738	1.48905e-16	1.85435e-14	ENSG00000076770	55796	MBNL3	X	132369317	132489968	-1	protein_coding	muscleblind like splicing regulator 3 [Source:HGNC Symbol;Acc:HGNC:20564]	DNA binding protein(PC00009)	NA	NA	ENSG00000076770
ENSG00000076826	ENSG00000076826	149.518	1.13895	0.313476	3.63329	0.000279829	0.00258366	ENSG00000076826	57662	CAMSAP3	19	7595902	7618304	1	protein_coding	calmodulin regulated spectrin associated protein family member 3 [Source:HGNC Symbol;Acc:HGNC:29307]	NA	NA	NA	ENSG00000076826
ENSG00000076864	ENSG00000076864	180.858	0.781967	0.307663	2.54163	0.0110336	0.0477498	ENSG00000076864	5909	RAP1GAP	1	21596215	21669363	-1	protein_coding	RAP1 GTPase activating protein [Source:HGNC Symbol;Acc:HGNC:9858]	G-protein modulator(PC00022)	NA	NA	ENSG00000076864
ENSG00000076924	ENSG00000076924	1128.3	0.268775	0.0993553	2.70519	0.00682658	0.0331314	ENSG00000076924	56949	XAB2	19	7619525	7629565	-1	protein_coding	XPA binding protein 2 [Source:HGNC Symbol;Acc:HGNC:14089]	damaged DNA-binding protein(PC00086)	mRNA splicing factor(PC00148)	transcription factor(PC00218)	ENSG00000076924
ENSG00000076928	ENSG00000076928	1232.44	-0.234879	0.232763	-1.00909	0.312931	0.511074	ENSG00000076928	9138	ARHGEF1	19	41883161	41930150	1	protein_coding	Rho guanine nucleotide exchange factor 1 [Source:HGNC Symbol;Acc:HGNC:681]	NA	NA	NA	ENSG00000076928
ENSG00000076944	ENSG00000076944	740.306	0.747833	0.197233	3.79162	0.000149671	0.00153434	ENSG00000076944	6813	STXBP2	19	7636881	7647873	1	protein_coding	syntaxin binding protein 2 [Source:HGNC Symbol;Acc:HGNC:11445]	membrane trafficking regulatory protein(PC00151)	transporter(PC00227)	NA	ENSG00000076944
ENSG00000076984	ENSG00000076984	797.55	0.313154	0.146123	2.14308	0.0321065	0.10646	ENSG00000076984	5609	MAP2K7	19	7903843	7914478	1	protein_coding	mitogen-activated protein kinase kinase 7 [Source:HGNC Symbol;Acc:HGNC:6847]	NA	NA	NA	ENSG00000076984
ENSG00000077009	ENSG00000077009	1.16218	2.70062	2.18532	1.2358	0.216532	NA	ENSG00000077009	27231	NMRK2	19	3933103	3942416	1	protein_coding	nicotinamide riboside kinase 2 [Source:HGNC Symbol;Acc:HGNC:17871]	glycosyltransferase(PC00111)	nucleotide kinase(PC00172)	NA	ENSG00000077009
ENSG00000077044	ENSG00000077044	3259.97	1.21935	0.163626	7.45204	9.19091e-14	7.82311e-12	ENSG00000077044	8527	DGKD	2	233354507	233472104	1	protein_coding	diacylglycerol kinase delta [Source:HGNC Symbol;Acc:HGNC:2851]	kinase(PC00137)	NA	NA	ENSG00000077044
ENSG00000077063	ENSG00000077063	86.0709	-0.00436963	0.236376	-0.0184859	0.985251	0.993782	ENSG00000077063	83992	CTTNBP2	7	117710651	117874139	-1	protein_coding	cortactin binding protein 2 [Source:HGNC Symbol;Acc:HGNC:15679]	NA	NA	NA	ENSG00000077063
ENSG00000077080	ENSG00000077080	0.071852	0.917077	4.32804	0.211892	0.832191	NA	ENSG00000077080	51412	ACTL6B	7	100643097	100656461	-1	protein_coding	actin like 6B [Source:HGNC Symbol;Acc:HGNC:160]	actin and actin related protein(PC00039)	NA	NA	ENSG00000077080
ENSG00000077092	ENSG00000077092	32.2938	0.864806	0.557362	1.5516	0.120757	0.27198	ENSG00000077092	5915	RARB	3	25174332	25597932	1	protein_coding	retinoic acid receptor beta [Source:HGNC Symbol;Acc:HGNC:9865]	C4 zinc finger nuclear receptor(PC00169)	nucleic acid binding(PC00171)	receptor(PC00197)	ENSG00000077092
ENSG00000077097	ENSG00000077097	5129.96	-0.367667	0.173502	-2.1191	0.0340821	0.111476	ENSG00000077097	7155	TOP2B	3	25597905	25664907	-1	protein_coding	topoisomerase (DNA) II beta [Source:HGNC Symbol;Acc:HGNC:11990]	NA	NA	NA	ENSG00000077097
ENSG00000077147	ENSG00000077147	7101.89	-0.871907	0.206095	-4.2306	2.33066e-05	0.000315921	ENSG00000077147	56889	TM9SF3	10	96518109	96587452	-1	protein_coding	transmembrane 9 superfamily member 3 [Source:HGNC Symbol;Acc:HGNC:21529]	transporter(PC00227)	NA	NA	ENSG00000077147
ENSG00000077150	ENSG00000077150	2694.75	1.50719	0.207145	7.27599	3.4388e-13	2.67486e-11	ENSG00000077150	4791	NFKB2	10	102394110	102402529	1	protein_coding	nuclear factor kappa B subunit 2 [Source:HGNC Symbol;Acc:HGNC:7795]	P53-like transcription factor(PC00253)	Rel homology transcription factor(PC00252)	nucleic acid binding(PC00171)	ENSG00000077150
ENSG00000077152	ENSG00000077152	1267.16	-0.184245	0.158756	-1.16056	0.245823	0.437989	ENSG00000077152	29089	UBE2T	1	202331657	202341980	-1	protein_coding	ubiquitin conjugating enzyme E2 T [Source:HGNC Symbol;Acc:HGNC:25009]	NA	NA	NA	ENSG00000077152
ENSG00000077157	ENSG00000077157	401.801	-0.0444602	0.355731	-0.124983	0.900537	0.948188	ENSG00000077157	4660	PPP1R12B	1	202348699	202592706	1	protein_coding	protein phosphatase 1 regulatory subunit 12B [Source:HGNC Symbol;Acc:HGNC:7619]	NA	NA	NA	ENSG00000077157
ENSG00000077232	ENSG00000077232	6399.03	-0.0216736	0.17542	-0.123552	0.90167	0.948517	ENSG00000077232	54431	DNAJC10	2	182716041	182794464	1	protein_coding	DnaJ heat shock protein family (Hsp40) member C10 [Source:HGNC Symbol;Acc:HGNC:24637]	NA	NA	NA	ENSG00000077232
ENSG00000077235	ENSG00000077235	2544.76	-0.213752	0.138955	-1.53829	0.123979	0.277018	ENSG00000077235	2975	GTF3C1	16	27459555	27549913	-1	protein_coding	general transcription factor IIIC subunit 1 [Source:HGNC Symbol;Acc:HGNC:4664]	NA	NA	NA	ENSG00000077235
ENSG00000077238	ENSG00000077238	622.76	0.131636	0.102587	1.28317	0.199434	0.382178	ENSG00000077238	3566	IL4R	16	27313668	27364778	1	protein_coding	interleukin 4 receptor [Source:HGNC Symbol;Acc:HGNC:6015]	type I cytokine receptor(PC00231)	NA	NA	ENSG00000077238
ENSG00000077254	ENSG00000077254	1752.1	0.04354	0.0890872	0.488735	0.625029	0.778208	ENSG00000077254	23032	USP33	1	77695987	77759852	-1	protein_coding	ubiquitin specific peptidase 33 [Source:HGNC Symbol;Acc:HGNC:20059]	cysteine protease(PC00081)	NA	NA	ENSG00000077254
ENSG00000077264	ENSG00000077264	303.399	-0.607559	0.47251	-1.28581	0.198509	0.380953	ENSG00000077264	5063	PAK3	X	110944285	111227361	1	protein_coding	p21 (RAC1) activated kinase 3 [Source:HGNC Symbol;Acc:HGNC:8592]	NA	NA	NA	ENSG00000077264
ENSG00000077274	ENSG00000077274	85.3128	-0.517628	0.607834	-0.851595	0.394439	0.591986	ENSG00000077274	827	CAPN6	X	111245103	111270523	-1	protein_coding	calpain 6 [Source:HGNC Symbol;Acc:HGNC:1483]	annexin(PC00050)	calmodulin(PC00061)	cysteine protease(PC00081)	ENSG00000077274
ENSG00000077279	ENSG00000077279	0.895282	2.37976	1.75518	1.35585	0.175148	NA	ENSG00000077279	1641	DCX	X	111293779	111412429	-1	protein_coding	doublecortin [Source:HGNC Symbol;Acc:HGNC:2714]	NA	NA	NA	ENSG00000077279
ENSG00000077312	ENSG00000077312	1981.44	-0.0576152	0.138067	-0.417299	0.67646	0.81398	ENSG00000077312	6626	SNRPA	19	40750637	40765389	1	protein_coding	small nuclear ribonucleoprotein polypeptide A [Source:HGNC Symbol;Acc:HGNC:11151]	mRNA splicing factor(PC00148)	NA	NA	ENSG00000077312
ENSG00000077327	ENSG00000077327	0.558221	2.23432	2.37162	0.942104	0.34614	NA	ENSG00000077327	9576	SPAG6	10	22345445	22454224	1	protein_coding	sperm associated antigen 6 [Source:HGNC Symbol;Acc:HGNC:11215]	microtubule family cytoskeletal protein(PC00157)	NA	NA	ENSG00000077327
ENSG00000077348	ENSG00000077348	218.454	0.567887	0.241835	2.34825	0.0188621	0.0720509	ENSG00000077348	56915	EXOSC5	19	41386374	41397479	-1	protein_coding	exosome component 5 [Source:HGNC Symbol;Acc:HGNC:24662]	exoribonuclease(PC00099)	hydrolase(PC00121)	nucleotidyltransferase(PC00174)	ENSG00000077348
ENSG00000077380	ENSG00000077380	3950.01	-0.0121598	0.295111	-0.0412041	0.967133	0.984027	ENSG00000077380	1781	DYNC1I2	2	171687409	171748420	1	protein_coding	dynein cytoplasmic 1 intermediate chain 2 [Source:HGNC Symbol;Acc:HGNC:2964]	microtubule family cytoskeletal protein(PC00157)	NA	NA	ENSG00000077380
ENSG00000077420	ENSG00000077420	1.46806	0.807149	1.24701	0.64727	0.517457	NA	ENSG00000077420	54518	APBB1IP	10	26438203	26567803	1	protein_coding	amyloid beta precursor protein binding family B member 1 interacting protein [Source:HGNC Symbol;Acc:HGNC:17379]	transmembrane receptor regulatory/adaptor protein(PC00226)	NA	NA	ENSG00000077420
ENSG00000077454	ENSG00000077454	834.181	0.931156	0.201791	4.61447	3.94109e-06	6.87108e-05	ENSG00000077454	4034	LRCH4	7	100574011	100586153	-1	protein_coding	leucine rich repeats and calponin homology domain containing 4 [Source:HGNC Symbol;Acc:HGNC:6691]	NA	NA	NA	ENSG00000077454
ENSG00000077458	ENSG00000077458	546.476	0.239414	0.208994	1.14555	0.25198	0.444929	ENSG00000077458	143684	FAM76B	11	95768942	95790409	-1	protein_coding	family with sequence similarity 76 member B [Source:HGNC Symbol;Acc:HGNC:28492]	NA	NA	NA	ENSG00000077458
ENSG00000077463	ENSG00000077463	238.639	0.423395	0.222591	1.90212	0.0571548	0.162218	ENSG00000077463	51548	SIRT6	19	4174109	4182604	-1	protein_coding	sirtuin 6 [Source:HGNC Symbol;Acc:HGNC:14934]	NA	NA	NA	ENSG00000077463
ENSG00000077498	ENSG00000077498	0.210199	0.917077	4.32804	0.211892	0.832191	NA	ENSG00000077498	7299	TYR	11	89177452	89295759	1	protein_coding	tyrosinase [Source:HGNC Symbol;Acc:HGNC:12442]	oxidase(PC00175)	oxygenase(PC00177)	NA	ENSG00000077498
ENSG00000077514	ENSG00000077514	1037.93	0.0497746	0.258545	0.192518	0.847336	0.919704	ENSG00000077514	10714	POLD3	11	74493851	74669117	1	protein_coding	DNA polymerase delta 3, accessory subunit [Source:HGNC Symbol;Acc:HGNC:20932]	NA	NA	NA	ENSG00000077514
ENSG00000077522	ENSG00000077522	64.0139	2.39137	0.691283	3.45932	0.000541538	0.00442733	ENSG00000077522	88	ACTN2	1	236686454	236764631	1	protein_coding	actinin alpha 2 [Source:HGNC Symbol;Acc:HGNC:164]	NA	NA	NA	ENSG00000077522
ENSG00000077549	ENSG00000077549	3533.78	0.701979	0.15992	4.38957	1.13575e-05	0.000172133	ENSG00000077549	832	CAPZB	1	19338776	19485539	-1	protein_coding	capping actin protein of muscle Z-line beta subunit [Source:HGNC Symbol;Acc:HGNC:1491]	non-motor actin binding protein(PC00165)	NA	NA	ENSG00000077549
ENSG00000077585	ENSG00000077585	485.054	0.0122501	0.251893	0.0486321	0.961213	0.980973	ENSG00000077585	7107	GPR137B	1	236142505	236221865	1	protein_coding	G protein-coupled receptor 137B [Source:HGNC Symbol;Acc:HGNC:11862]	NA	NA	NA	ENSG00000077585
ENSG00000077616	ENSG00000077616	223.504	1.1775	0.34346	3.42835	0.000607256	0.00485497	ENSG00000077616	10003	NAALAD2	11	90131515	90192894	1	protein_coding	N-acetylated alpha-linked acidic dipeptidase 2 [Source:HGNC Symbol;Acc:HGNC:14526]	metalloprotease(PC00153)	NA	NA	ENSG00000077616
ENSG00000077684	ENSG00000077684	1449.65	-0.7788	0.195377	-3.98615	6.71551e-05	0.000790722	ENSG00000077684	79960	JADE1	4	128809623	128875224	1	protein_coding	jade family PHD finger 1 [Source:HGNC Symbol;Acc:HGNC:30027]	nucleic acid binding(PC00171)	zinc finger transcription factor(PC00244)	NA	ENSG00000077684
ENSG00000077713	ENSG00000077713	341.776	-0.474126	0.125262	-3.78509	0.000153654	0.00157007	ENSG00000077713	203427	SLC25A43	X	119399060	119454478	1	protein_coding	solute carrier family 25 member 43 [Source:HGNC Symbol;Acc:HGNC:30557]	amino acid transporter(PC00046)	calmodulin(PC00061)	mitochondrial carrier protein(PC00158)	ENSG00000077713
ENSG00000077721	ENSG00000077721	1030.05	-0.133899	0.138319	-0.968046	0.333022	0.531455	ENSG00000077721	7319	UBE2A	X	119574467	119591083	1	protein_coding	ubiquitin conjugating enzyme E2 A [Source:HGNC Symbol;Acc:HGNC:12472]	NA	NA	NA	ENSG00000077721
ENSG00000077782	ENSG00000077782	2425.14	-0.321446	0.182402	-1.76229	0.0780197	0.200849	ENSG00000077782	2260	FGFR1	8	38411138	38468834	-1	protein_coding	fibroblast growth factor receptor 1 [Source:HGNC Symbol;Acc:HGNC:3688]	NA	NA	NA	ENSG00000077782
ENSG00000077800	ENSG00000077800	1.45508	-3.0939	1.57411	-1.96549	0.049357	NA	ENSG00000077800	8468	FKBP6	7	73328164	73358637	1	protein_coding	FK506 binding protein 6 [Source:HGNC Symbol;Acc:HGNC:3722]	NA	NA	NA	ENSG00000077800
ENSG00000077935	ENSG00000077935	0	NA	NA	NA	NA	NA	ENSG00000077935	27127	SMC1B	22	45344063	45413619	-1	protein_coding	structural maintenance of chromosomes 1B [Source:HGNC Symbol;Acc:HGNC:11112]	NA	NA	NA	ENSG00000077935
ENSG00000077942	ENSG00000077942	3697.21	0.411314	0.182317	2.25604	0.0240684	0.0865503	ENSG00000077942	2192	FBLN1	22	45502238	45601135	1	protein_coding	fibulin 1 [Source:HGNC Symbol;Acc:HGNC:3600]	NA	NA	NA	ENSG00000077942
ENSG00000077943	ENSG00000077943	14.4561	1.14713	0.848165	1.35248	0.176221	0.350861	ENSG00000077943	8516	ITGA8	10	15513949	15720125	-1	protein_coding	integrin subunit alpha 8 [Source:HGNC Symbol;Acc:HGNC:6144]	NA	NA	NA	ENSG00000077943
ENSG00000077984	ENSG00000077984	46.1208	0.230025	0.291768	0.788383	0.430473	0.623212	ENSG00000077984	8530	CST7	20	24949230	24959928	1	protein_coding	cystatin F [Source:HGNC Symbol;Acc:HGNC:2479]	NA	NA	NA	ENSG00000077984
ENSG00000078018	ENSG00000078018	437.746	0.935093	0.402279	2.32449	0.0200993	0.075634	ENSG00000078018	4133	MAP2	2	209424058	209734118	1	protein_coding	microtubule associated protein 2 [Source:HGNC Symbol;Acc:HGNC:6839]	NA	NA	NA	ENSG00000078018
ENSG00000078043	ENSG00000078043	585.111	-0.15595	0.212319	-0.734507	0.46264	0.650222	ENSG00000078043	9063	PIAS2	18	46803224	46920160	-1	protein_coding	protein inhibitor of activated STAT 2 [Source:HGNC Symbol;Acc:HGNC:17311]	NA	NA	NA	ENSG00000078043
ENSG00000078053	ENSG00000078053	969.032	-0.215369	0.136762	-1.57477	0.11531	0.263446	ENSG00000078053	273	AMPH	7	38383704	38631567	-1	protein_coding	amphiphysin [Source:HGNC Symbol;Acc:HGNC:471]	NA	NA	NA	ENSG00000078053
ENSG00000078061	ENSG00000078061	1188.29	0.186754	0.154192	1.21118	0.225828	0.414352	ENSG00000078061	369	ARAF	X	47561100	47571920	1	protein_coding	A-Raf proto-oncogene, serine/threonine kinase [Source:HGNC Symbol;Acc:HGNC:646]	NA	NA	NA	ENSG00000078061
ENSG00000078070	ENSG00000078070	521.546	0.0288857	0.217641	0.132721	0.894414	0.944553	ENSG00000078070	56922	MCCC1	3	183015218	183116075	-1	protein_coding	methylcrotonoyl-CoA carboxylase 1 [Source:HGNC Symbol;Acc:HGNC:6936]	ligase(PC00142)	NA	NA	ENSG00000078070
ENSG00000078081	ENSG00000078081	152.868	0.208905	0.317223	0.658542	0.51019	0.69045	ENSG00000078081	27074	LAMP3	3	183122213	183163839	-1	protein_coding	lysosomal associated membrane protein 3 [Source:HGNC Symbol;Acc:HGNC:14582]	membrane trafficking regulatory protein(PC00151)	NA	NA	ENSG00000078081
ENSG00000078098	ENSG00000078098	224.074	-1.1371	0.243343	-4.67281	2.97101e-06	5.3495e-05	ENSG00000078098	2191	FAP	2	162170684	162245151	-1	protein_coding	fibroblast activation protein alpha [Source:HGNC Symbol;Acc:HGNC:3590]	enzyme modulator(PC00095)	serine protease(PC00203)	NA	ENSG00000078098
ENSG00000078114	ENSG00000078114	127.68	0.24198	0.378127	0.639944	0.522209	0.700241	ENSG00000078114	10529	NEBL	10	20779973	21174187	-1	protein_coding	nebulette [Source:HGNC Symbol;Acc:HGNC:16932]	NA	NA	NA	ENSG00000078114
ENSG00000078124	ENSG00000078124	725.531	0.0703987	0.152903	0.460414	0.645219	0.792573	ENSG00000078124	55331	ACER3	11	76860867	77026797	1	protein_coding	alkaline ceramidase 3 [Source:HGNC Symbol;Acc:HGNC:16066]	NA	NA	NA	ENSG00000078124
ENSG00000078140	ENSG00000078140	2311.6	0.242023	0.133247	1.81634	0.0693181	0.18532	ENSG00000078140	3093	UBE2K	4	39698044	39782792	1	protein_coding	ubiquitin conjugating enzyme E2 K [Source:HGNC Symbol;Acc:HGNC:4914]	NA	NA	NA	ENSG00000078140
ENSG00000078142	ENSG00000078142	586.494	0.490319	0.161647	3.03328	0.00241914	0.0145574	ENSG00000078142	5289	PIK3C3	18	41955206	42087830	1	protein_coding	phosphatidylinositol 3-kinase catalytic subunit type 3 [Source:HGNC Symbol;Acc:HGNC:8974]	kinase(PC00137)	NA	NA	ENSG00000078142
ENSG00000078177	ENSG00000078177	1558.55	-1.07237	0.306925	-3.49391	0.000476008	0.00398327	ENSG00000078177	55728	N4BP2	4	40056826	40158252	1	protein_coding	NEDD4 binding protein 2 [Source:HGNC Symbol;Acc:HGNC:29851]	NA	NA	NA	ENSG00000078177
ENSG00000078237	ENSG00000078237	1109.7	0.400979	0.342563	1.17053	0.241788	0.434151	ENSG00000078237	57103	TIGAR	12	4307763	4354593	1	protein_coding	TP53 induced glycolysis regulatory phosphatase [Source:HGNC Symbol;Acc:HGNC:1185]	NA	NA	NA	ENSG00000078237
ENSG00000078246	ENSG00000078246	1500.56	-0.557953	0.21853	-2.55321	0.0106734	0.0465293	ENSG00000078246	7289	TULP3	12	2877223	2941140	1	protein_coding	tubby like protein 3 [Source:HGNC Symbol;Acc:HGNC:12425]	NA	NA	NA	ENSG00000078246
ENSG00000078269	ENSG00000078269	1878.2	0.694403	0.180757	3.84163	0.000122221	0.00129931	ENSG00000078269	8871	SYNJ2	6	157981887	158099176	1	protein_coding	synaptojanin 2 [Source:HGNC Symbol;Acc:HGNC:11504]	phosphatase(PC00181)	NA	NA	ENSG00000078269
ENSG00000078295	ENSG00000078295	99.6656	0.0604093	0.649407	0.0930222	0.925886	0.962949	ENSG00000078295	108	ADCY2	5	7396208	7830081	1	protein_coding	adenylate cyclase 2 [Source:HGNC Symbol;Acc:HGNC:233]	NA	NA	NA	ENSG00000078295
ENSG00000078304	ENSG00000078304	2286.21	-0.51981	0.300606	-1.72921	0.0837718	0.210785	ENSG00000078304	5527	PPP2R5C	14	101761798	101927989	1	protein_coding	protein phosphatase 2 regulatory subunit B'gamma [Source:HGNC Symbol;Acc:HGNC:9311]	protein phosphatase(PC00195)	NA	NA	ENSG00000078304
ENSG00000078319	ENSG00000078319	214.079	-0.343855	0.129457	-2.65614	0.00790403	0.0368728	ENSG00000078319	NA	PMS2P1	7	100320992	100341908	-1	unprocessed_pseudogene	PMS1 homolog 2, mismatch repair system component pseudogene 1 [Source:HGNC Symbol;Acc:HGNC:9123]	NA	NA	NA	ENSG00000078319
ENSG00000078328	ENSG00000078328	33.3282	0.192046	0.421812	0.455289	0.648902	0.795125	ENSG00000078328	54715	RBFOX1	16	5239802	7713338	1	protein_coding	RNA binding protein, fox-1 homolog 1 [Source:HGNC Symbol;Acc:HGNC:18222]	RNA binding protein(PC00031)	NA	NA	ENSG00000078328
ENSG00000078369	ENSG00000078369	5670.97	-0.424001	0.325686	-1.30187	0.192961	0.373454	ENSG00000078369	2782	GNB1	1	1785285	1891117	-1	protein_coding	G protein subunit beta 1 [Source:HGNC Symbol;Acc:HGNC:4396]	heterotrimeric G-protein(PC00117)	hydrolase(PC00121)	NA	ENSG00000078369
ENSG00000078399	ENSG00000078399	321.551	0.603009	0.185596	3.24904	0.00115794	0.00810205	ENSG00000078399	3205	HOXA9	7	27162435	27175180	-1	protein_coding	homeobox A9 [Source:HGNC Symbol;Acc:HGNC:5109]	NA	NA	NA	ENSG00000078399
ENSG00000078401	ENSG00000078401	362.46	0.500585	0.379162	1.32024	0.186755	0.365246	ENSG00000078401	1906	EDN1	6	12290363	12297194	1	protein_coding	endothelin 1 [Source:HGNC Symbol;Acc:HGNC:3176]	peptide hormone(PC00179)	NA	NA	ENSG00000078401
ENSG00000078403	ENSG00000078403	1184.28	0.335931	0.143298	2.34428	0.0190637	0.0726464	ENSG00000078403	8028	MLLT10	10	21524675	21743630	1	protein_coding	MLLT10, histone lysine methyltransferase DOT1L cofactor [Source:HGNC Symbol;Acc:HGNC:16063]	nucleic acid binding(PC00171)	zinc finger transcription factor(PC00244)	NA	ENSG00000078403
ENSG00000078487	ENSG00000078487	83.2997	-0.244452	0.265891	-0.919371	0.357901	0.555656	ENSG00000078487	55063	ZCWPW1	7	100400826	100428992	-1	protein_coding	zinc finger CW-type and PWWP domain containing 1 [Source:HGNC Symbol;Acc:HGNC:23486]	NA	NA	NA	ENSG00000078487
ENSG00000078549	ENSG00000078549	86.0172	0.511142	0.602305	0.848644	0.39608	0.593693	ENSG00000078549	117	ADCYAP1R1	7	31052461	31111479	1	protein_coding	ADCYAP receptor type I [Source:HGNC Symbol;Acc:HGNC:242]	NA	NA	NA	ENSG00000078549
ENSG00000078579	ENSG00000078579	7.87278	0.745623	0.898023	0.830294	0.406373	0.602351	ENSG00000078579	26281	FGF20	8	16992169	17002181	-1	protein_coding	fibroblast growth factor 20 [Source:HGNC Symbol;Acc:HGNC:3677]	growth factor(PC00112)	NA	NA	ENSG00000078579
ENSG00000078589	ENSG00000078589	3.04704	0.358955	0.884983	0.405607	0.685032	0.819535	ENSG00000078589	27334	P2RY10	X	78945332	78961954	1	protein_coding	purinergic receptor P2Y10 [Source:HGNC Symbol;Acc:HGNC:19906]	NA	NA	NA	ENSG00000078589
ENSG00000078596	ENSG00000078596	2.75603	0.845613	1.22039	0.692903	0.48837	0.671543	ENSG00000078596	9452	ITM2A	X	79360384	79367667	-1	protein_coding	integral membrane protein 2A [Source:HGNC Symbol;Acc:HGNC:6173]	NA	NA	NA	ENSG00000078596
ENSG00000078618	ENSG00000078618	5489.75	0.570862	0.208069	2.74361	0.00607668	0.0302577	ENSG00000078618	4898	NRDC	1	51789191	51878937	-1	protein_coding	nardilysin convertase [Source:HGNC Symbol;Acc:HGNC:7995]	metalloprotease(PC00153)	NA	NA	ENSG00000078618
ENSG00000078668	ENSG00000078668	2396.77	-0.435344	0.098617	-4.41449	1.01249e-05	0.000156235	ENSG00000078668	7419	VDAC3	8	42391624	42405897	1	protein_coding	voltage dependent anion channel 3 [Source:HGNC Symbol;Acc:HGNC:12674]	anion channel(PC00049)	voltage-gated ion channel(PC00241)	NA	ENSG00000078668
ENSG00000078674	ENSG00000078674	2675.26	-0.440082	0.228739	-1.92395	0.0543605	0.156376	ENSG00000078674	5108	PCM1	8	17922840	18029944	1	protein_coding	pericentriolar material 1 [Source:HGNC Symbol;Acc:HGNC:8727]	NA	NA	NA	ENSG00000078674
ENSG00000078687	ENSG00000078687	370.404	-0.845126	0.308774	-2.73704	0.00619951	0.030694	ENSG00000078687	57690	TNRC6C	17	77959240	78108835	1	protein_coding	trinucleotide repeat containing 6C [Source:HGNC Symbol;Acc:HGNC:29318]	NA	NA	NA	ENSG00000078687
ENSG00000078699	ENSG00000078699	862.934	0.576815	0.269084	2.14363	0.0320628	0.106374	ENSG00000078699	9139	CBFA2T2	20	33490075	33650036	1	protein_coding	CBFA2/RUNX1 translocation partner 2 [Source:HGNC Symbol;Acc:HGNC:1536]	transcription cofactor(PC00217)	NA	NA	ENSG00000078699
ENSG00000078725	ENSG00000078725	121.29	0.354815	0.591291	0.600069	0.548461	0.721156	ENSG00000078725	1620	BRINP1	9	119153458	119369467	-1	protein_coding	BMP/retinoic acid inducible neural specific 1 [Source:HGNC Symbol;Acc:HGNC:2687]	NA	NA	NA	ENSG00000078725
ENSG00000078747	ENSG00000078747	1934.29	0.113484	0.27446	0.413479	0.679255	0.815442	ENSG00000078747	83737	ITCH	20	34363235	34511393	1	protein_coding	itchy E3 ubiquitin protein ligase [Source:HGNC Symbol;Acc:HGNC:13890]	ubiquitin-protein ligase(PC00234)	NA	NA	ENSG00000078747
ENSG00000078795	ENSG00000078795	9.171	0.0952845	0.476997	0.199759	0.841669	0.916615	ENSG00000078795	27039	PKD2L2	5	137887968	137942747	1	protein_coding	polycystin 2 like 2, transient receptor potential cation channel [Source:HGNC Symbol;Acc:HGNC:9012]	G-protein modulator(PC00022)	ion channel(PC00133)	membrane-bound signaling molecule(PC00152)	ENSG00000078795
ENSG00000078804	ENSG00000078804	883.453	-0.0254389	0.203678	-0.124898	0.900604	0.948188	ENSG00000078804	58476	TP53INP2	20	34704290	34713439	1	protein_coding	tumor protein p53 inducible nuclear protein 2 [Source:HGNC Symbol;Acc:HGNC:16104]	NA	NA	NA	ENSG00000078804
ENSG00000078808	ENSG00000078808	1127.88	0.253351	0.215285	1.17682	0.239268	0.430972	ENSG00000078808	51150	SDF4	1	1216908	1232031	-1	protein_coding	stromal cell derived factor 4 [Source:HGNC Symbol;Acc:HGNC:24188]	calmodulin(PC00061)	NA	NA	ENSG00000078808
ENSG00000078814	ENSG00000078814	28.5859	1.47839	0.569441	2.59621	0.00942585	0.0422043	ENSG00000078814	57644	MYH7B	20	34975403	35002437	1	protein_coding	myosin heavy chain 7B [Source:HGNC Symbol;Acc:HGNC:15906]	NA	NA	NA	ENSG00000078814
ENSG00000078898	ENSG00000078898	0	NA	NA	NA	NA	NA	ENSG00000078898	80341	BPIFB2	20	33007600	33023709	1	protein_coding	BPI fold containing family B member 2 [Source:HGNC Symbol;Acc:HGNC:16177]	NA	NA	NA	ENSG00000078898
ENSG00000078900	ENSG00000078900	191.547	-1.2818	0.239109	-5.36074	8.28834e-08	2.24922e-06	ENSG00000078900	7161	TP73	1	3652520	3736201	1	protein_coding	tumor protein p73 [Source:HGNC Symbol;Acc:HGNC:12003]	P53-like transcription factor(PC00253)	NA	NA	ENSG00000078900
ENSG00000078902	ENSG00000078902	459.984	-0.0717403	0.296961	-0.241581	0.809105	0.8979	ENSG00000078902	54472	TOLLIP	11	1274371	1309654	-1	protein_coding	toll interacting protein [Source:HGNC Symbol;Acc:HGNC:16476]	NA	NA	NA	ENSG00000078902
ENSG00000078967	ENSG00000078967	550.807	0.351437	0.264955	1.3264	0.184706	0.362556	ENSG00000078967	51619	UBE2D4	7	43926438	43956136	1	protein_coding	ubiquitin conjugating enzyme E2 D4 (putative) [Source:HGNC Symbol;Acc:HGNC:21647]	ligase(PC00142)	NA	NA	ENSG00000078967
ENSG00000079101	ENSG00000079101	27.9685	1.64319	0.805276	2.04053	0.0412975	0.128083	ENSG00000079101	27098	CLUL1	18	596988	650334	1	protein_coding	clusterin like 1 [Source:HGNC Symbol;Acc:HGNC:2096]	NA	NA	NA	ENSG00000079101
ENSG00000079102	ENSG00000079102	5.13451	-1.00412	1.00115	-1.00297	0.315877	0.514262	ENSG00000079102	862	RUNX1T1	8	91954967	92103286	-1	protein_coding	RUNX1 translocation partner 1 [Source:HGNC Symbol;Acc:HGNC:1535]	transcription cofactor(PC00217)	NA	NA	ENSG00000079102
ENSG00000079112	ENSG00000079112	0.982658	-0.389736	2.41587	-0.161323	0.871839	NA	ENSG00000079112	1015	CDH17	8	94127171	94217303	-1	protein_coding	cadherin 17 [Source:HGNC Symbol;Acc:HGNC:1756]	NA	NA	NA	ENSG00000079112
ENSG00000079134	ENSG00000079134	1037.43	0.313541	0.373062	0.840451	0.400656	0.597768	ENSG00000079134	9984	THOC1	18	214520	268050	-1	protein_coding	THO complex 1 [Source:HGNC Symbol;Acc:HGNC:19070]	nucleic acid binding(PC00171)	NA	NA	ENSG00000079134
ENSG00000079150	ENSG00000079150	438.281	0.611056	0.299105	2.04295	0.0410577	0.1276	ENSG00000079150	51661	FKBP7	2	178463664	178478600	-1	protein_coding	FK506 binding protein 7 [Source:HGNC Symbol;Acc:HGNC:3723]	NA	NA	NA	ENSG00000079150
ENSG00000079156	ENSG00000079156	431.977	0.318817	0.233682	1.36432	0.172468	0.345758	ENSG00000079156	114880	OSBPL6	2	178194481	178402891	1	protein_coding	oxysterol binding protein like 6 [Source:HGNC Symbol;Acc:HGNC:16388]	NA	NA	NA	ENSG00000079156
ENSG00000079215	ENSG00000079215	1534	1.93311	0.402263	4.80559	1.54292e-06	3.0027e-05	ENSG00000079215	6507	SLC1A3	5	36606355	36688334	1	protein_coding	solute carrier family 1 member 3 [Source:HGNC Symbol;Acc:HGNC:10941]	cation transporter(PC00068)	NA	NA	ENSG00000079215
ENSG00000079246	ENSG00000079246	12902.5	-0.171484	0.123805	-1.38511	0.166018	0.338053	ENSG00000079246	7520	XRCC5	2	216107464	216206303	1	protein_coding	X-ray repair cross complementing 5 [Source:HGNC Symbol;Acc:HGNC:12833]	DNA helicase(PC00011)	NA	NA	ENSG00000079246
ENSG00000079257	ENSG00000079257	0	NA	NA	NA	NA	NA	ENSG00000079257	56925	LXN	3	158645822	158672693	-1	protein_coding	latexin [Source:HGNC Symbol;Acc:HGNC:13347]	NA	NA	NA	ENSG00000079257
ENSG00000079263	ENSG00000079263	565.744	1.97101	0.283084	6.96263	3.33984e-12	2.21604e-10	ENSG00000079263	11262	SP140	2	230203110	230313215	1	protein_coding	SP140 nuclear body protein [Source:HGNC Symbol;Acc:HGNC:17133]	NA	NA	NA	ENSG00000079263
ENSG00000079277	ENSG00000079277	110.815	-0.267737	0.334156	-0.801233	0.422997	0.617079	ENSG00000079277	8569	MKNK1	1	46557408	46616843	-1	protein_coding	MAP kinase interacting serine/threonine kinase 1 [Source:HGNC Symbol;Acc:HGNC:7110]	non-motor microtubule binding protein(PC00166)	non-receptor serine/threonine protein kinase(PC00167)	NA	ENSG00000079277
ENSG00000079308	ENSG00000079308	2166.36	-0.673456	0.242443	-2.77779	0.00547297	0.0278945	ENSG00000079308	7145	TNS1	2	217799789	218002995	-1	protein_coding	tensin 1 [Source:HGNC Symbol;Acc:HGNC:11973]	NA	NA	NA	ENSG00000079308
ENSG00000079313	ENSG00000079313	597.584	0.250119	0.275037	0.909403	0.363137	0.561578	ENSG00000079313	57455	REXO1	19	1815246	1848463	-1	protein_coding	RNA exonuclease 1 homolog [Source:HGNC Symbol;Acc:HGNC:24616]	exoribonuclease(PC00099)	NA	NA	ENSG00000079313
ENSG00000079332	ENSG00000079332	3262.61	0.175742	0.15525	1.13199	0.257637	0.451388	ENSG00000079332	56681	SAR1A	10	70147289	70170523	-1	protein_coding	secretion associated Ras related GTPase 1A [Source:HGNC Symbol;Acc:HGNC:10534]	NA	NA	NA	ENSG00000079332
ENSG00000079335	ENSG00000079335	266.93	0.18966	0.150841	1.25735	0.208627	0.393949	ENSG00000079335	8556	CDC14A	1	100345025	100520277	1	protein_coding	cell division cycle 14A [Source:HGNC Symbol;Acc:HGNC:1718]	NA	NA	NA	ENSG00000079335
ENSG00000079337	ENSG00000079337	154.945	1.99279	0.43598	4.57084	4.8578e-06	8.21439e-05	ENSG00000079337	10411	RAPGEF3	12	47734367	47771040	-1	protein_coding	Rap guanine nucleotide exchange factor 3 [Source:HGNC Symbol;Acc:HGNC:16629]	guanyl-nucleotide exchange factor(PC00113)	NA	NA	ENSG00000079337
ENSG00000079385	ENSG00000079385	38.9449	1.33038	0.433222	3.0709	0.00213418	0.0131763	ENSG00000079385	634	CEACAM1	19	42507304	42561234	-1	protein_coding	carcinoembryonic antigen related cell adhesion molecule 1 [Source:HGNC Symbol;Acc:HGNC:1814]	NA	NA	NA	ENSG00000079385
ENSG00000079387	ENSG00000079387	1050.74	-0.880943	0.265702	-3.31554	0.000914677	0.00672085	ENSG00000079387	29843	SENP1	12	48042898	48106308	-1	protein_coding	SUMO1/sentrin specific peptidase 1 [Source:HGNC Symbol;Acc:HGNC:17927]	protease(PC00190)	NA	NA	ENSG00000079387
ENSG00000079393	ENSG00000079393	0.905108	1.99614	1.61668	1.23471	0.216938	NA	ENSG00000079393	51207	DUSP13	10	75094432	75109221	-1	protein_coding	dual specificity phosphatase 13 [Source:HGNC Symbol;Acc:HGNC:19681]	NA	NA	NA	ENSG00000079393
ENSG00000079432	ENSG00000079432	2645.37	-0.341384	0.145089	-2.35292	0.0186264	0.0714163	ENSG00000079432	23152	CIC	19	42268537	42295797	1	protein_coding	capicua transcriptional repressor [Source:HGNC Symbol;Acc:HGNC:14214]	NA	NA	NA	ENSG00000079432
ENSG00000079435	ENSG00000079435	138.944	-0.628437	0.193471	-3.24822	0.0011613	0.00811884	ENSG00000079435	3991	LIPE	19	42401507	42427426	-1	protein_coding	lipase E, hormone sensitive type [Source:HGNC Symbol;Acc:HGNC:6621]	NA	NA	NA	ENSG00000079435
ENSG00000079459	ENSG00000079459	4465.72	-0.816493	0.205834	-3.96675	7.28598e-05	0.000845294	ENSG00000079459	2222	FDFT1	8	11795573	11839309	1	protein_coding	farnesyl-diphosphate farnesyltransferase 1 [Source:HGNC Symbol;Acc:HGNC:3629]	NA	NA	NA	ENSG00000079459
ENSG00000079462	ENSG00000079462	922.702	-0.480836	0.149694	-3.21212	0.0013176	0.00898056	ENSG00000079462	5050	PAFAH1B3	19	42297033	42303546	-1	protein_coding	platelet activating factor acetylhydrolase 1b catalytic subunit 3 [Source:HGNC Symbol;Acc:HGNC:8576]	NA	NA	NA	ENSG00000079462
ENSG00000079482	ENSG00000079482	525.692	0.199364	0.249418	0.799318	0.424106	0.618048	ENSG00000079482	4983	OPHN1	X	68042344	68433913	-1	protein_coding	oligophrenin 1 [Source:HGNC Symbol;Acc:HGNC:8148]	G-protein modulator(PC00022)	NA	NA	ENSG00000079482
ENSG00000079557	ENSG00000079557	0.231015	1.76123	4.31696	0.40798	0.683289	NA	ENSG00000079557	173	AFM	4	73481683	73504001	1	protein_coding	afamin [Source:HGNC Symbol;Acc:HGNC:316]	transfer/carrier protein(PC00219)	NA	NA	ENSG00000079557
ENSG00000079616	ENSG00000079616	2238.51	-0.334446	0.22506	-1.48603	0.137271	0.296828	ENSG00000079616	3835	KIF22	16	29790719	29805385	1	protein_coding	kinesin family member 22 [Source:HGNC Symbol;Acc:HGNC:6391]	microtubule binding motor protein(PC00156)	NA	NA	ENSG00000079616
ENSG00000079689	ENSG00000079689	0.111386	-0.525604	4.32804	-0.121442	0.903341	NA	ENSG00000079689	10590	SCGN	6	25652201	25701783	1	protein_coding	secretagogin, EF-hand calcium binding protein [Source:HGNC Symbol;Acc:HGNC:16941]	NA	NA	NA	ENSG00000079689
ENSG00000079691	ENSG00000079691	417.13	-0.0193731	0.143013	-0.135464	0.892245	0.94411	ENSG00000079691	55604	CARMIL1	6	25279078	25620530	1	protein_coding	capping protein regulator and myosin 1 linker 1 [Source:HGNC Symbol;Acc:HGNC:21581]	nucleic acid binding(PC00171)	transcription cofactor(PC00217)	NA	ENSG00000079691
ENSG00000079739	ENSG00000079739	1571.32	-0.516281	0.241452	-2.13823	0.0324978	0.107518	ENSG00000079739	5236	PGM1	1	63593276	63660245	1	protein_coding	phosphoglucomutase 1 [Source:HGNC Symbol;Acc:HGNC:8905]	NA	NA	NA	ENSG00000079739
ENSG00000079785	ENSG00000079785	4476.65	0.398122	0.15333	2.5965	0.00941789	0.0421836	ENSG00000079785	1653	DDX1	2	15591178	15631111	1	protein_coding	DEAD-box helicase 1 [Source:HGNC Symbol;Acc:HGNC:2734]	NA	NA	NA	ENSG00000079785
ENSG00000079805	ENSG00000079805	1702.18	0.269984	0.080945	3.3354	0.000851768	0.00634808	ENSG00000079805	1785	DNM2	19	10718079	10833488	1	protein_coding	dynamin 2 [Source:HGNC Symbol;Acc:HGNC:2974]	hydrolase(PC00121)	microtubule family cytoskeletal protein(PC00157)	small GTPase(PC00208)	ENSG00000079805
ENSG00000079819	ENSG00000079819	6494.34	0.705966	0.157206	4.4907	7.09881e-06	0.000114377	ENSG00000079819	2037	EPB41L2	6	130839347	131063322	-1	protein_coding	erythrocyte membrane protein band 4.1 like 2 [Source:HGNC Symbol;Acc:HGNC:3379]	NA	NA	NA	ENSG00000079819
ENSG00000079841	ENSG00000079841	12.9609	0.530381	0.434421	1.22089	0.222127	0.409911	ENSG00000079841	22999	RIMS1	6	71886703	72403143	1	protein_coding	regulating synaptic membrane exocytosis 1 [Source:HGNC Symbol;Acc:HGNC:17282]	G-protein modulator(PC00022)	NA	NA	ENSG00000079841
ENSG00000079931	ENSG00000079931	1465.41	-0.23458	0.248459	-0.944143	0.345097	0.54359	ENSG00000079931	26002	MOXD1	6	132296055	132401545	-1	protein_coding	monooxygenase DBH like 1 [Source:HGNC Symbol;Acc:HGNC:21063]	NA	NA	NA	ENSG00000079931
ENSG00000079950	ENSG00000079950	1041.54	0.222196	0.23731	0.936312	0.349112	0.54724	ENSG00000079950	8417	STX7	6	132445867	132513198	-1	protein_coding	syntaxin 7 [Source:HGNC Symbol;Acc:HGNC:11442]	SNARE protein(PC00034)	NA	NA	ENSG00000079950
ENSG00000079974	ENSG00000079974	1097.49	0.302953	0.107185	2.82645	0.00470667	0.0247781	ENSG00000079974	11158	RABL2B	22	50767501	50783663	-1	protein_coding	RAB, member of RAS oncogene family like 2B [Source:HGNC Symbol;Acc:HGNC:9800]	NA	NA	NA	ENSG00000079974
ENSG00000079999	ENSG00000079999	945.027	-0.171302	0.172653	-0.992172	0.321113	0.520203	ENSG00000079999	9817	KEAP1	19	10486120	10503741	-1	protein_coding	kelch like ECH associated protein 1 [Source:HGNC Symbol;Acc:HGNC:23177]	NA	NA	NA	ENSG00000079999
ENSG00000080007	ENSG00000080007	485.422	0.250222	0.148048	1.69014	0.0910006	0.223003	ENSG00000080007	55510	DDX43	6	73394748	73417569	1	protein_coding	DEAD-box helicase 43 [Source:HGNC Symbol;Acc:HGNC:18677]	NA	NA	NA	ENSG00000080007
ENSG00000080031	ENSG00000080031	104.801	-0.140811	0.36359	-0.387279	0.69855	0.828281	ENSG00000080031	5794	PTPRH	19	55181248	55209506	-1	protein_coding	protein tyrosine phosphatase, receptor type H [Source:HGNC Symbol;Acc:HGNC:9672]	protein phosphatase(PC00195)	NA	NA	ENSG00000080031
ENSG00000080166	ENSG00000080166	1.94355	2.5348	1.50421	1.68514	0.091961	0.224572	ENSG00000080166	1638	DCT	13	94436808	94479682	-1	protein_coding	dopachrome tautomerase [Source:HGNC Symbol;Acc:HGNC:2709]	oxidase(PC00175)	oxygenase(PC00177)	NA	ENSG00000080166
ENSG00000080189	ENSG00000080189	1492.48	0.176764	0.119113	1.484	0.137809	0.297604	ENSG00000080189	51006	SLC35C2	20	46345980	46364458	-1	protein_coding	solute carrier family 35 member C2 [Source:HGNC Symbol;Acc:HGNC:17117]	NA	NA	NA	ENSG00000080189
ENSG00000080200	ENSG00000080200	1220.51	0.182743	0.191061	0.956464	0.338838	0.537347	ENSG00000080200	131544	CRYBG3	3	97822040	97944963	1	protein_coding	crystallin beta-gamma domain containing 3 [Source:HGNC Symbol;Acc:HGNC:34427]	NA	NA	NA	ENSG00000080200
ENSG00000080224	ENSG00000080224	95.1571	-1.14066	0.374556	-3.04537	0.00232393	0.014136	ENSG00000080224	285220	EPHA6	3	96814581	97752460	1	protein_coding	EPH receptor A6 [Source:HGNC Symbol;Acc:HGNC:19296]	NA	NA	NA	ENSG00000080224
ENSG00000080293	ENSG00000080293	1.02981	-0.989888	1.57723	-0.627611	0.530259	NA	ENSG00000080293	6344	SCTR	2	119439843	119525301	-1	protein_coding	secretin receptor [Source:HGNC Symbol;Acc:HGNC:10608]	NA	NA	NA	ENSG00000080293
ENSG00000080298	ENSG00000080298	383.063	0.22176	0.169789	1.3061	0.191519	0.371574	ENSG00000080298	5991	RFX3	9	3218297	3526004	-1	protein_coding	regulatory factor X3 [Source:HGNC Symbol;Acc:HGNC:9984]	winged helix/forkhead transcription factor(PC00246)	NA	NA	ENSG00000080298
ENSG00000080345	ENSG00000080345	2522.51	-0.0540969	0.180244	-0.300132	0.764077	0.870711	ENSG00000080345	55183	RIF1	2	151409883	151508013	1	protein_coding	replication timing regulatory factor 1 [Source:HGNC Symbol;Acc:HGNC:23207]	NA	NA	NA	ENSG00000080345
ENSG00000080371	ENSG00000080371	783.656	-0.013143	0.227324	-0.0578164	0.953895	0.977402	ENSG00000080371	23011	RAB21	12	71754874	71800285	1	protein_coding	RAB21, member RAS oncogene family [Source:HGNC Symbol;Acc:HGNC:18263]	NA	NA	NA	ENSG00000080371
ENSG00000080493	ENSG00000080493	29.9373	-0.362497	0.306138	-1.1841	0.236375	0.427374	ENSG00000080493	8671	SLC4A4	4	71186757	71572087	1	protein_coding	solute carrier family 4 member 4 [Source:HGNC Symbol;Acc:HGNC:11030]	cation transporter(PC00068)	NA	NA	ENSG00000080493
ENSG00000080503	ENSG00000080503	1222.94	-0.359019	0.247219	-1.45223	0.146436	0.310746	ENSG00000080503	6595	SMARCA2	9	1980290	2193624	1	protein_coding	SWI/SNF related, matrix associated, actin dependent regulator of chromatin, subfamily a, member 2 [Source:HGNC Symbol;Acc:HGNC:11098]	DNA helicase(PC00011)	NA	NA	ENSG00000080503
ENSG00000080511	ENSG00000080511	1.55886	1.80652	1.79167	1.00829	0.313314	NA	ENSG00000080511	50700	RDH8	19	10013249	10022279	1	protein_coding	retinol dehydrogenase 8 (all-trans) [Source:HGNC Symbol;Acc:HGNC:14423]	dehydrogenase(PC00092)	reductase(PC00198)	NA	ENSG00000080511
ENSG00000080546	ENSG00000080546	627.055	1.04551	0.162352	6.43975	1.19672e-10	5.99073e-09	ENSG00000080546	27244	SESN1	6	108986437	109094819	-1	protein_coding	sestrin 1 [Source:HGNC Symbol;Acc:HGNC:21595]	peroxidase(PC00180)	NA	NA	ENSG00000080546
ENSG00000080561	ENSG00000080561	103.153	0.182988	0.356593	0.513158	0.607841	0.765046	ENSG00000080561	11043	MID2	X	107825755	107927193	1	protein_coding	midline 2 [Source:HGNC Symbol;Acc:HGNC:7096]	NA	NA	NA	ENSG00000080561
ENSG00000080572	ENSG00000080572	2.14906	0.220352	0.932057	0.236414	0.813111	0.90043	ENSG00000080572	139212	PIH1D3	X	107206632	107244243	1	protein_coding	PIH1 domain containing 3 [Source:HGNC Symbol;Acc:HGNC:28570]	NA	NA	NA	ENSG00000080572
ENSG00000080573	ENSG00000080573	89.8657	-1.0353	0.50477	-2.05104	0.040263	0.125925	ENSG00000080573	50509	COL5A3	19	9959561	10010471	-1	protein_coding	collagen type V alpha 3 chain [Source:HGNC Symbol;Acc:HGNC:14864]	NA	NA	NA	ENSG00000080573
ENSG00000080603	ENSG00000080603	2654.79	-1.36704	0.414736	-3.29616	0.000980164	0.00711823	ENSG00000080603	10847	SRCAP	16	30698209	30741409	1	protein_coding	Snf2 related CREBBP activator protein [Source:HGNC Symbol;Acc:HGNC:16974]	NA	NA	NA	ENSG00000080603
ENSG00000080608	ENSG00000080608	1039.08	0.715507	0.194332	3.68188	0.000231519	0.00220031	ENSG00000080608	9933	PUM3	9	2720469	2844241	-1	protein_coding	pumilio RNA binding family member 3 [Source:HGNC Symbol;Acc:HGNC:29676]	NA	NA	NA	ENSG00000080608
ENSG00000080618	ENSG00000080618	0.071852	0.917077	4.32804	0.211892	0.832191	NA	ENSG00000080618	1361	CPB2	13	46053186	46105076	-1	protein_coding	carboxypeptidase B2 [Source:HGNC Symbol;Acc:HGNC:2300]	metalloprotease(PC00153)	NA	NA	ENSG00000080618
ENSG00000080644	ENSG00000080644	102.679	1.50095	0.556873	2.69532	0.00703209	0.0338741	ENSG00000080644	1136	CHRNA3	15	78593052	78621295	-1	protein_coding	cholinergic receptor nicotinic alpha 3 subunit [Source:HGNC Symbol;Acc:HGNC:1957]	GABA receptor(PC00023)	acetylcholine receptor(PC00037)	NA	ENSG00000080644
ENSG00000080709	ENSG00000080709	48.1324	0.916709	0.305455	3.00112	0.00268986	0.0159175	ENSG00000080709	3781	KCNN2	5	114360945	114496500	1	protein_coding	potassium calcium-activated channel subfamily N member 2 [Source:HGNC Symbol;Acc:HGNC:6291]	voltage-gated potassium channel(PC00242)	NA	NA	ENSG00000080709
[truncated: 58,617 more rows]

## Sheet: CT_WT.CHK1i_WT.Not
	Gene	baseMean	log2FoldChange	lfcSE	stat	pvalue	padj	ensembl_geneid	entrez	symbol	chr	start	end	strand	biotype	description	Panther.Class.1	Panther.Class.2	Panther.Class.3	GeneID
[truncated: 60,121 more rows]

[truncated: 4 more sheets: CT_CR.CHK1i_CR.Not, CT_CR.CHK1i_WT.CHK1i, CT_CR.CHK1i_WT.Not, CT_CR.Not_WT.CHK1i]
