# Supplementary material for: Regulation of CHK1 inhibitor resistance by a c-Rel and USP1 dependent pathway
Source: Biochem J. 2022 Oct 14;479(19):2063–86. doi: 10.1042/BCJ20220102 (PMC9704646; doi:10.1042/BCJ20220102)
Supplement: Supplementary Material 9 [file BCJ-479-2063-s9.pdf]

## Sheet: Description
Supp Data File 7 RNA Seq counts_tximport_U2OS.csv
Data for all genes and samples from RNA Seq analysis of U2OS cells

## Sheet: Supp Data File 7 RNA Seq counts
	1_WT1	10_CR1andCHK1i	11_CR2	12_CR2andCHK1i	13_CR3	14_CR3andCHK1i	15_CR4	16_CR4andCHK1i	2_WT1andCHK1i	3_WT2	4_WT2andCHK1i	5_WT3	6_WT3andCHK1i	7_WT4	8_WT4andCHK1i	9_CR1
ENSG00000000003	1489.47	1435.81	1314.36	1531.29	1276.6	1464.74	1424.79	1664.81	1179.28	1409.13	1253.76	1339.8	1358.62	1264.71	1317.92	1298.01
ENSG00000000005	0	0	0	0	0.986839	0	16.507	16.2742	0	0.996381	0	0	0	0	0	0
ENSG00000000419	1364.95	1656.67	1023.1	1230.06	1282.53	1301.12	1549.68	1832.67	1148.05	1509.8	1275.38	1106.13	1636.11	1293.24	1316.2	1572.48
ENSG00000000457	236.951	224.453	229.538	223.001	171.808	191.46	172.225	224.924	235.122	213.934	189.923	182.156	197.018	188.973	238.088	188.646
ENSG00000000460	775.949	759.706	748.421	608.935	730.233	595.258	431.48	467.524	509.184	695.768	498.665	683.754	470.684	714.909	590.05	810.098
ENSG00000000938	0.698364	0	0	0	0	1.36296	0.677455	0.568827	0	0	1.37544	0	0	0	0	2.41494
ENSG00000000971	147.881	141.803	355.016	336.499	175.663	167.662	379.222	460.667	153.909	156.642	148.774	174.009	172.563	145.098	198.121	120.104
ENSG00000001036	2080.96	2381.83	2565.51	2540.47	1811.97	1848.71	1419.38	1438.28	1643.74	2003.97	1704.1	1913.01	1774.72	1864.11	1924.6	2408.9
ENSG00000001084	1960.23	1913.14	1438.67	1181.14	1209.96	976.577	2172.87	2255.17	1606.61	1970.4	1732	1697.92	2040.32	1591.31	1647.69	2040.58
ENSG00000001167	2312.7	3811.5	1728.42	1835.97	1431.92	1742.48	3418	3832.6	2943.16	2239.47	2791.07	1843.25	2954.39	1979.44	2905.24	3362.32
ENSG00000001460	336.125	394.521	272.296	276.449	176.083	210.983	427.283	468.173	351.197	294.424	358.071	305.794	342.087	251.648	373.206	346.906
ENSG00000001461	602.945	938.756	565.495	561.979	356.684	377.21	977.015	1005.77	903.262	532.259	997.617	472.574	825.968	468.711	938.689	898.707
ENSG00000001497	2174.35	2830.44	1921.28	2285.05	2021.77	1836.87	2285.28	2415.73	1772.39	2243.18	1677.77	1739.33	1842.67	1780.71	1729.26	3055.59
ENSG00000001561	798.685	584.986	431.606	517.386	432.108	404.2	799.446	928.182	564.378	690.442	570.273	746.685	683.613	702.967	653.614	585.989
ENSG00000001617	1485.44	914.922	762.271	754.829	963.898	652.943	2465.43	2538.48	1105	1264.28	1214.95	1007	1303.47	1173.1	1201.08	1391.69
ENSG00000001626	0.550902	0.551461	0.543549	0	3.27548	0.546717	24.4382	0	4.04373	0	8.50264	0.554192	3.16907	0	21.1697	0
ENSG00000001629	3696.16	2809.3	1276.92	1115.02	1027.24	978.001	3822.33	3758.93	3053.74	3525.98	2520.7	2767.14	3485.84	3244.47	2717.29	2812.63
ENSG00000001630	2571.12	3227.61	1579.87	1445.61	1318.25	1439.79	1295.82	1436.02	2128.38	2729.29	2092.34	2470.54	2308.74	2536.88	2532	2815.09
ENSG00000001631	1128.03	929.567	1251.06	1004.72	1071.58	1092.66	589.754	608.322	834.445	1123.99	879.011	817.592	965.718	867.147	829.988	841.726
ENSG00000002016	436.782	533.777	1122.21	896.538	956.883	714.639	575.688	531.477	370.757	463.769	303.635	374.634	424.27	365.902	400.556	452.153
ENSG00000002079	207.507	167.828	14.702	75.8261	44.5745	78.2131	133.146	107.447	772.547	146.933	695.938	190.162	884.727	148.444	558.086	40.5007
ENSG00000002330	601.383	762.246	376.712	492.356	317.445	327.234	386.742	380.28	340.14	465.857	514.547	549.872	393.039	501.638	459.894	716.305
ENSG00000002549	1063.89	1709.98	800.706	982.073	760.438	761.489	1062.45	1069.53	1186.81	1051.43	1253.03	922.566	1277.13	875.89	1231.22	1689.8
ENSG00000002586	1793.22	1464.89	2040.83	1978.73	1643.07	1454.4	2172.22	2425.85	1350.82	1675.55	1489.9	1621.51	2075.36	1573.08	1576.37	1757.53
ENSG00000002587	4.75128	5.14487	12.6783	6.82657	8.3944	7.41145	6.73815	2.14524	5.19275	5.42521	5.03533	0.982615	7.19738	7.06147	7.60743	7.91691
ENSG00000002726	4.4118	0.696902	5.41079	0	0	4.02815	2.0259	2.45834	0.6842	2.01786	0	2.04966	1.33362	2.0344	2.01305	1.38833
ENSG00000002745	0	0	0	0	0	0	0	0	0	0	0	0	0	0	0	0
ENSG00000002746	95.2032	80.5216	73.3916	90.3487	58.2783	93.4968	72.4648	52.9839	72.6261	81.1691	74.0955	117.42	68.7514	98.6693	60.3143	103.148
ENSG00000002822	1674.14	1230.74	805.452	790.702	657.107	974.37	1416.01	1389.63	1566.34	1894.07	1988.91	1348.38	1447.94	1393.14	1565.34	1247.03
ENSG00000002834	15988.1	14204.7	8549.37	8945.64	6303.22	6811.61	9410.68	9678.82	14138.1	15492	15367.3	12868.6	13579.5	13497	15559.1	14063
ENSG00000002919	597.821	556.021	384.554	361.968	283.859	334.583	385.439	443.13	526.362	597.229	570.882	484.953	543.651	501.125	573.37	643.562
ENSG00000002933	69.2314	10.5684	65.3294	69.9667	55.8822	25.2193	80.7479	80.2535	17.5431	27.5668	34.1439	59.6715	33.108	35.4901	37.4712	28.0898
ENSG00000003056	7758.26	6157.89	4778.27	4627.74	4145.41	3903.7	5891.34	6939.52	6919.17	7222.48	6643.13	6416.35	10077.6	6626.36	6733.95	6230.94
ENSG00000003096	272.942	210.435	84.2381	98.5173	63.0137	73.32	213.392	256.053	174.044	271.671	141.478	252.159	191.306	303.418	183.455	236.393
ENSG00000003137	755.563	841.321	1034.98	1005.45	607.414	503.817	1049.74	975.323	731.998	657.191	1088.09	580.074	800.044	628.881	937.878	896.903
ENSG00000003147	83.0621	62.0204	58.8853	56.7545	53.4107	34.3307	96.1747	133.356	43.5216	89.9466	75.7211	81.5038	59.1943	72.3887	76.2513	47.995
ENSG00000003249	648.522	223.545	83.1808	104.896	178.418	141.296	482.586	516.849	310.441	653.702	357.062	612.355	355.17	680.962	457.302	230.383
ENSG00000003393	1454.34	1625.84	1048.98	933.031	820.98	823.075	2222.59	2372.87	1815.78	1400.25	1563.67	1180.92	2372.44	1166.41	1676.12	1529.26
ENSG00000003400	87.183	98.509	60.199	85.4521	52.7747	47.4088	64.4237	81.4876	97.6921	60.0247	94.5005	58.2619	118.829	101.587	68.6899	29.821
ENSG00000003402	1096.41	1722.25	1141.57	1168.17	887.973	1068.45	1068.96	1113.07	1158.18	975.557	1352.71	979.608	1306.45	1007.71	1438.2	1505.41
ENSG00000003436	1090.83	1156.97	873.143	969.963	797.658	923.691	1428.46	1668.19	929.674	1045.77	912.285	1128.57	1147.53	999.271	1000.29	1045.34
ENSG00000003509	806.461	775.873	1367.9	1232.45	1397.03	1329.58	719.833	939.709	725.793	831.573	782.782	591.45	901.528	589.865	787.555	780.631
ENSG00000003756	2987.6	2142.77	4099.68	2709.96	3546.21	2633.23	2464.15	2591.35	2464.87	3103.26	2083.5	2536.63	3261.14	2760.91	2602.45	2260.88
ENSG00000003987	1.72612	1.7275	3.40684	2.58385	0.850726	10.4144	0.83765	0.827828	0.847807	1.71326	0	0	0.828058	2.14057	0	2.59225
ENSG00000003989	938.46	1188	605.296	610.664	493.247	551.83	858.525	832.604	1080.42	926.38	1101.51	896.473	908.021	766.826	1045.75	1288.73
ENSG00000004059	2361.82	1956.29	909.748	1312.85	1037.75	972.341	1988.29	2348.59	1952.31	2114.77	2068.5	1896.77	2376.28	1754.45	2123.79	1809.46
ENSG00000004139	104.416	83.3386	125.409	56.8801	87.4131	57.9111	48.8498	29.9812	78.3627	95.3568	126.173	69.8365	81.4763	61.4013	78.4845	80.9261
ENSG00000004142	2634.44	2485.14	881.712	1033	1004.57	958.316	1460.94	1658.68	2635.21	2411.99	2829.71	2240.85	2447.83	2235.69	2555.88	2307.11
ENSG00000004399	2334.74	1505.73	2350.05	1920.79	1593.45	1383.79	2365.52	2435.03	2061.92	1832.53	1712.94	1713.57	1814	1847.66	1847.33	1960.06
ENSG00000004455	3926.31	5346	2986.34	3184.88	2690.7	2395.95	3452.46	4012.27	3430.8	3900.24	3433.84	3340.68	3805.71	3419.24	3448.91	5597.55
ENSG00000004468	0.897248	3.61522	3.54166	0.899213	2.6532	4.85174	1.74165	4.12789	1.58326	0	6.73359	0	4.81124	0.898808	3.56705	0
ENSG00000004478	6538.93	8875.61	4404.72	4739.04	5030	5173.65	5920.77	6894	8601.3	7438.51	8726.8	5819.25	9157.78	5685.38	8972.75	8993.37
ENSG00000004487	4533.31	3789.31	2862.27	3016.18	3005.78	2467.1	4063.91	4449.2	2784.98	4308.92	3145.45	3742.88	3410.98	3698.26	3474.58	4420.67
ENSG00000004534	2736.9	2615.64	6314.72	4500.17	5586.92	4741.81	3864.99	4030.47	2453.84	2899.05	2330.1	2332.67	3834.33	2249.23	2219.15	2695.48
ENSG00000004660	608.699	573.183	581.581	463.77	515.422	374.986	663.781	637.751	459.375	549.444	457.546	484.486	518.256	518.049	479.257	615.051
ENSG00000004700	4189.19	3700.44	1620.94	1894.87	1318.87	1481.6	2550.5	2947.53	4268.01	4158.47	4364.51	3770.46	4624.92	3648.46	4399.83	3401.24
ENSG00000004766	571.614	714.84	528.732	468.609	294.862	339.051	679.949	723.628	491.574	763.218	474.632	623.522	520.408	536.229	411.22	669.376
ENSG00000004776	28.6262	10.879	10.7069	11.0327	8.75396	8.82257	9.57212	14.1639	38.8503	26.4976	41.5747	30.8615	70.0878	29.7397	39.2339	7.8327
ENSG00000004777	825.204	148.421	315.805	247.832	489.056	252.315	376.828	340.544	444.086	678.82	426.47	524.908	404.708	660.997	434.564	233.033
ENSG00000004779	948.574	1178.47	653.986	842.602	707.077	780.059	743.344	932.39	1053.01	965.941	1367.23	963.647	1121.56	877.941	1146.95	1155.81
ENSG00000004799	82.5509	75.982	91.7531	107.01	69.4131	65.9135	640.888	700.469	140.881	44.6893	125.23	54.4005	174.354	57.0588	163.988	109.087
ENSG00000004809	4.27856	0	0	7.91133	1.40498	1.41716	2.05239	1.3618	2.80974	0.681001	4.12444	0.801758	1.96838	1.37541	2.15283	0.678863
ENSG00000004838	42.6217	13.5953	68.4271	36.9077	37.6277	53.1908	25.5073	31.1694	33.7828	28.6669	47.4028	13.677	27.1882	18.7308	17.7055	32.9569
ENSG00000004846	117.888	15.1109	37.5768	23.0916	26.64	26.3876	29.2048	43.1854	20.6963	103.307	17.3471	69.7921	21.2308	78.5727	31.3084	28.7501
ENSG00000004848	0	3.0065	2.96294	0.999146	0	0	0	0	0.983833	0	1.0041	1.0073	0.959423	1.0036	0.994932	3.99802
ENSG00000004864	1812.85	1673.94	1282.1	1243.9	1039.57	931.46	876.695	998.734	1140.09	1744.32	1078.34	1591.21	1332.32	1641.13	1340.75	1745.72
ENSG00000004866	411.339	362.861	311.341	393.838	282.915	292.627	273.877	360.013	351.438	433.535	347.479	353.249	354.705	336.643	346.278	437.635
ENSG00000004897	5987.08	3410.86	2119.14	2215.38	2139.06	1940.25	2328.81	2822.42	4569.8	6201.32	4192.77	5017.8	4947.26	5283.12	4794.46	3664.9
ENSG00000004939	6.01146	10.7457	24.2235	18.7524	13.9299	9.98461	8.35661	10.8054	8.50508	11.7018	13.4209	12.6203	10.7984	9.19773	18.6375	7.77345
ENSG00000004948	1.4447	2.37379	0.916482	0	0	0	0	0	2.73802	1.8443	5.59028	1.86858	6.23434	4.65467	2.76961	0
ENSG00000004961	356.81	615.468	302.993	433.117	340.791	345.188	394.797	409.138	398.206	340.621	423.128	285.448	448.454	284.152	418.712	577.364
ENSG00000004975	1356.63	808.997	554.218	469.55	534.787	435.879	861.621	902.917	759.416	1127.01	811.595	1017.08	824.737	1063.79	958.312	1004.88
ENSG00000005001	3.65365	0	0	0	1.79771	0	0	1.51734	1.808	3.25042	4.95871	1.4874	2.83448	0.740176	0.731047	0
ENSG00000005007	1883.58	2510.99	1716.71	1559.81	1591.08	1562.67	1486.8	1598.73	1385.71	1545.39	1569.25	1365	1192.35	1318.99	1445.18	2250.89
ENSG00000005020	7.62834	4.6417	15.1089	4.65952	2.93631	5.65673	9.50161	11.1739	2.75948	8.06114	5.55816	8.47297	6.31757	2.79479	6.45574	3.89389
ENSG00000005022	11985.2	9631.8	5468.76	7685.59	6558.04	6152.99	6665.31	8283.57	9998.55	10653.3	10791	10696.6	10555.7	9797.28	11704.7	9195.66
ENSG00000005059	367.014	185.028	97.9387	112.91	98.4976	79.2325	170.207	254.307	262.403	540.291	255.544	305.17	343.714	436.597	244.779	212.323
ENSG00000005073	241.217	299.499	146.605	159.302	177.588	164.464	199.495	215.934	152.966	210.04	186.074	173.585	177.695	184.621	197.264	343.931
ENSG00000005075	1256.62	1216.66	618.994	884.994	741.586	637.291	1097.39	1244.59	951.17	1214.35	1092.85	980.93	1341.06	1011	1027.64	1282.07
ENSG00000005100	1291.47	2069.82	1078.25	937.545	864.721	963.813	953.75	902.294	1445.58	1332.72	1413.71	1130.15	1164.51	1153.79	1427.61	1960.46
ENSG00000005102	32.8672	9.33211	12.0439	17.809	14.8086	5.59231	17.3119	20.6967	8.30695	27.9778	4.70957	31.1641	0	29.1893	9.3332	22.4911
ENSG00000005108	5.50116	6.29069	17.0646	33.1644	1.54947	19.5433	66.9145	15.8372	1.54353	15.3341	3.15373	15.0669	3.77249	1.57394	0.781137	2.36466
ENSG00000005156	1800.27	1297.26	1111.8	905.243	810.441	964.922	1526.23	1559.37	1525.78	1673.98	1443.09	1314.95	1610.74	1405.93	1390.76	1404.16
ENSG00000005175	1496.85	2014.61	991.169	1142.49	965.204	1130.74	1707.79	1908.78	1785.33	1765.41	1840.34	1398.97	2381.39	1395.93	1790.55	1747.64
ENSG00000005187	149.206	18.6718	36.9634	54.658	40.7416	10.656	100.251	132.986	35.9645	93.1367	49.4743	80.9255	55.0635	70.5771	36.1558	25.9774
ENSG00000005189	402.146	198.086	165.287	154.13	159.52	122.924	138.405	130.613	421.049	336.734	368.157	330.137	345.293	293.346	349.038	208.661
ENSG00000005194	1085.1	1502.67	655.375	718.498	719.453	733.214	719.047	991.14	1202.91	939.624	1252.31	836.497	1134.95	899.382	1287.7	1432.21
ENSG00000005206	567.154	407.565	574.306	457.244	451.941	453.524	395.326	410.548	352.814	415.419	409.953	434.696	300.585	442.095	410.484	362.795
ENSG00000005238	919.342	1110.93	552.331	579.26	470.09	446.582	1568.82	1870.51	1021.3	891.781	1246.01	750.077	1115.53	749.026	1022.77	1100.09
ENSG00000005243	274.231	213.833	140.049	153.476	90.5034	97.6745	81.5367	87.6763	255.216	289.07	321.317	246.59	236.213	266.971	258.658	211.12
ENSG00000005249	740.265	557.065	273.554	311.698	320.592	267.15	894.439	1097.76	535.863	678.292	526.728	715.88	734.717	763.309	717.026	663.479
ENSG00000005302	899.754	985.339	557.653	441.711	440.834	481.597	736.092	832.774	647.919	663.113	746.665	645.56	967.806	767.487	815.043	755.375
ENSG00000005339	6602.91	3332.98	1879.11	1054.74	983.866	1209.9	1555.36	1655.69	4078.53	6143.92	3755	4193	3962.46	5184.51	4268.08	3275.41
ENSG00000005379	13.8094	46.4284	129.514	114.784	130.679	91.8281	105.982	110.716	18.1689	20.3246	4.55088	8.74201	4.09409	10.3129	19.7154	62.7594
ENSG00000005381	0	0	0.987696	0	0	0	0.971388	0.95957	0.983723	0	0	0	0	0	2.9849	0
ENSG00000005421	2.11352	0	0	0.999456	1.2342	0	0	0	0	0	0	0	0.990092	0	0	0
ENSG00000005436	760.684	771.848	709.474	800.74	652.069	652.723	431.522	539.482	569.983	649.923	553.078	530	637.297	524.801	570.421	659.902
ENSG00000005448	1288.73	751.217	899.598	999.862	990.102	821.167	749.772	861.793	947.2	1244.76	1050.8	1094.54	853.824	989.86	1060.69	804.121
ENSG00000005469	231.447	254.585	544.013	347.678	398.17	302.898	251.651	215.924	200.516	207.655	163.168	163.563	175.736	199.217	218.406	276.354
ENSG00000005471	186.148	37.9119	285.585	85.2501	120.811	81.4984	134.326	262.205	53.8091	165.292	52.4745	114.239	36.1307	74.2895	23.6354	91.4405
ENSG00000005483	3314.01	2557.95	1490.23	1265.62	1616.55	1302.09	2370.03	2698.94	1814.17	2965.05	1643.65	2623.36	1918.04	2511.21	1980.76	2767.5
ENSG00000005486	1647.32	1265.31	1119.85	1268.72	994.15	941.679	1180.9	1243.76	1319.14	1545.67	1523.47	1481.39	1212.55	1462.21	1542.07	1105.33
ENSG00000005513	78.8539	43.133	25.9004	36.9773	27.5964	53.7116	214.054	216.874	192.648	34.7603	342.967	82.704	267.431	43.3364	201.146	22.6332
ENSG00000005700	1664.7	1651.37	1361.97	1129.03	1084.45	1058.32	1538.18	1447.08	1448.39	1716.11	1409.19	1515.3	1544.22	1541.71	1500.96	1625.12
ENSG00000005801	832.069	955.577	2376.24	1813.06	2304.5	2238.04	646.656	770.857	951.843	878.452	897.496	703.644	937.998	762.624	913.006	831.283
ENSG00000005810	2020	1883.72	1641.71	1535.06	1387.32	1532.58	1672.59	1261.04	1382.48	1774.49	1157.58	1254.95	1356.61	1617.68	1444.49	1931.07
ENSG00000005812	889.096	914.471	449.006	564.189	398.623	413.01	588.968	649.32	832.254	824.998	879.505	784.215	905.433	724.58	978.992	884.018
ENSG00000005844	12.0935	10.4476	18.4608	23.6692	18.8453	7.34358	4.83522	6.92747	4.8459	7.08669	16.956	1.11025	3.57554	2.73393	8.58016	7.52534
ENSG00000005882	1639.47	601.376	311.41	348.419	352.212	289.954	1179.36	1317.59	1076.2	1464.87	1179.03	1504.8	1188.73	1396.81	1080.18	831.825
ENSG00000005884	25126.7	19489.1	17811.7	15640.1	13728.7	13379.3	19560	20688.9	27225.8	22480.1	27316.5	20820.8	27926.3	19744.6	27191.7	19274.3
ENSG00000005889	606.368	654.425	324.671	286.88	215.601	285.12	342.277	443.416	505.556	688.919	428.788	515.684	473.522	476.34	646.689	556.466
ENSG00000005893	5380.98	5593.17	4182.41	4621.38	3292.85	3785.11	6843.78	8265.97	4329.26	5049.53	4531.19	4893.57	4575.65	4453.1	4927.21	5517.16
ENSG00000005961	64.1421	10.2331	64.2571	27.785	90.2742	34.7867	97.9201	93.1616	31.5578	45.2902	44.6956	49.6664	28.723	45.9753	37.8022	20.8739
ENSG00000005981	3.35679	1.67999	6.61884	2.10054	0.827189	4.1996	11.7576	11.5732	9.49424	0.83663	0	2.14841	11.5527	0.841048	7.17705	0.839152
ENSG00000006007	2392.31	2380.41	1177.5	1412.25	977.858	1153.41	1799.05	2045.77	2412.21	2363.91	2569.57	2422.21	2450.82	2229.15	2822.95	2347.17
ENSG00000006015	264.744	291.356	277.67	297.533	269.358	269.393	216.018	239.286	245.898	268.416	442.226	298.633	323.728	239.4	330.331	239.56
ENSG00000006016	457.278	50.2646	93.5488	61.4136	245.824	216.585	628.098	675.479	308.057	321.763	341.381	391.348	447.463	265.475	224.762	34.5003
ENSG00000006025	448.848	245.898	460.917	323.977	402.803	259.297	335.254	436.999	561.233	460.779	512.332	263.269	483.339	387.171	359.761	228.066
ENSG00000006042	2372.48	1480.19	1216.16	1362.15	963.911	832.687	1090.31	1189.67	1749.69	2179.41	2018.37	2199.95	1802.08	1802.67	2056.89	1621.66
ENSG00000006047	149.135	177.623	305.896	290.801	270.253	205.858	335.225	321.792	63.9133	139.253	73.2613	134.196	96.1866	94.5969	102.534	223.729
ENSG00000006059	0	0	0	0	0	0	0	0	3.00659	0.995535	3.0557	0	2.18721	0	2.03866	0
ENSG00000006062	568.477	1470.69	1026.93	903.158	866.365	869.354	982.409	1036.9	675.799	502.38	699.537	464.686	603.482	412.522	609.097	1461.13
ENSG00000006071	74.6327	10.9633	30.8026	19.2145	66.769	37.3031	10.7579	14.9946	35.2379	50.2107	27.0045	29.287	46.6519	60.5852	95.3323	20.1408
ENSG00000006116	0	0	0	0	0	0	0	0	0	0	0	0	0	1.00167	0	0
ENSG00000006118	1756.23	2632.24	4447	4332.64	4364.52	3925.98	2589.16	2538.14	1518.57	1542.31	1546.61	1401.97	1117.69	1519.7	1399.38	3065.79
ENSG00000006125	11569.9	9904.08	2989.8	3598.22	2990.49	3368.73	7289.66	8131.04	10519.6	11599	10312.4	9999.43	9888.44	9933.63	10657	10335.4
ENSG00000006128	3.97268	0.735107	2.6122	1.32723	1.38369	0	2.56813	5.57103	0	2.65044	0	0	1.25732	0.737577	0	0
ENSG00000006194	1114.57	1000.18	821.504	788.465	743.133	613.469	874.807	1057.58	1433.34	1144.56	1424.91	943.733	1440.19	1019.52	1529.54	984.492
ENSG00000006210	661.65	141.63	161.536	180.952	171.461	96.4276	577.585	629.145	454.268	475.377	509.233	536.273	540.295	518.912	628.429	191.841
ENSG00000006282	4348.51	2687.14	3307.1	2978.22	2660.44	2163.14	3054.66	2984.76	3194	4055.44	3364.2	3332.8	3398.89	3466.54	3297.27	2575.26
ENSG00000006283	720.639	135.145	132.893	115.425	193.814	119.296	480.403	479.609	520.326	580.787	588.081	596.648	544.164	548.292	631.476	136.567
ENSG00000006327	3538	4471.17	5485.28	6309.56	5477.03	4894.09	2775.82	3327.95	3580.06	3358.05	3892.06	2982.48	3745.45	2590.62	3509.92	4658.17
ENSG00000006377	0	0	0	0	0	0.992616	0	0	0	0	0	0	0	0	0	0
ENSG00000006432	2477.2	1727.63	629.212	576.357	579.723	631.993	2442.24	2630.72	2243.73	2245.58	2417.86	1763.8	2383.29	2011.31	2549.12	1714.91
ENSG00000006451	1544.04	1848.34	1136.84	1446.65	1217.15	1327.57	2093.97	2447.16	1524.84	1569.26	1600.42	1292.09	2133.43	1328.44	1673.48	2023.63
ENSG00000006453	1729.2	1502.3	888.349	948.462	967.751	806.416	1825.08	2066.08	1114.84	1580.69	1144.97	1634.91	1519.34	1534.57	1301.45	1572.37
ENSG00000006459	167.114	688.457	415.922	513.925	465.109	413.372	882.77	979.937	548.964	187.192	453.731	141.108	530.129	212.799	664.569	502.652
ENSG00000006468	371.729	66.8199	52.432	31.5949	31.699	37.6669	305.128	302.555	142.818	203.858	51.1924	178.002	170.85	281.144	97.6639	106.061
ENSG00000006530	578.682	665.639	561.788	515.28	457.495	510.048	601.804	630.888	551.513	731.342	533.15	495.536	585.243	499.505	529.863	746.094
ENSG00000006534	1315.09	1036.83	1118.24	1175.94	1042.56	835.689	835.19	975.677	585.37	1219.25	677.871	1203.11	706.859	1185.13	832.066	1293.36
ENSG00000006555	3.31138	0.902476	5.48413	1.47701	4.71644	0.908117	1.82017	4.03354	2.67124	0	1.83163	0	0	0	2.72385	0
ENSG00000006576	2693.23	1706.16	1188.8	1060.53	1067	977.446	1733.66	2235.11	2418.73	2680.38	2285.74	2598.44	2658.05	2450	2357.99	1744.42
ENSG00000006606	209.247	169.707	333.225	311.871	239.218	218.063	125.265	184.149	131.171	218.285	152.92	152.59	92.0229	230.869	183.424	189.317
ENSG00000006607	1154.17	1417.81	641.966	620.412	609.758	573.348	932.482	1214.41	1103.81	1095.86	928.111	834.672	841.117	896.552	1069.58	1700.26
ENSG00000006611	79.8638	50.5385	80.7137	133.613	48.2256	24.0056	199.23	241.801	33.5686	40.8237	51.5856	54.1729	55.4874	68.1186	64.203	40.8533
ENSG00000006625	2107.14	1881.33	1012.39	1024.02	1016.33	941.164	1405.25	1659.24	1674.22	2203.35	1727.84	1721.83	2210.03	1808.3	1847.67	1907.33
ENSG00000006634	1716.17	1744.16	1101.82	1233.98	1169.81	1058.66	973.932	1202.79	1466.37	1704.39	1317.21	1406.06	1604.34	1575.01	1553.32	1558.49
ENSG00000006638	36.8596	35.1959	74.4059	73.147	68.3052	37.9753	44.7179	46.6501	42.9721	32.3468	43.1988	34.7565	51.3451	29.3096	37.7558	66.9449
ENSG00000006652	708.605	1257.04	1584.49	1332.35	1191.57	1175.28	1348.16	1617.88	800.021	749.944	766.549	697.453	953.998	591.206	805.107	1178.66
ENSG00000006659	0	0	0	0	0.893686	0	0	0	0	0	0	0	0	0.914612	0	1.22152
ENSG00000006695	351.849	480.454	252.892	259.87	201.875	243.814	325.905	341.714	302.77	351.238	345.174	357.656	345.927	277.673	327.874	385.724
ENSG00000006704	1122.03	728.84	1110.73	855.954	1349.82	764.164	868.397	914.953	603.384	1107.4	711.004	860.35	630.567	890.555	657.829	1046
ENSG00000006712	2416.89	1958.12	1329.63	1457.22	1742.23	1552.63	2368.48	2614.48	3071.3	2428.86	3140.12	1977.02	3780.1	2165.31	3101.87	1922.82
ENSG00000006715	3065.72	1702.67	1161.7	944.335	905.166	847.092	1653.8	1676.45	2397.33	2978.54	2142.85	2734.94	2417.79	2576.55	2409.18	1644.27
ENSG00000006740	188.745	242.46	118.632	123.716	149.65	88.5715	482.486	349.105	166.27	180.33	152.44	157.924	126.402	128.859	131.506	224.496
ENSG00000006744	1193.74	2013.56	1152.38	1347.26	1024.7	919.908	1269.78	1614.35	1513.73	1593.29	1059.73	1204.76	1273.5	1231.13	1264.2	1827.72
ENSG00000006747	53.6653	104.679	35.8593	66.6744	21.0493	37.214	242.902	235.418	87.2739	31.7998	104.503	46.8902	126.998	37.6675	104.175	87.23
ENSG00000006756	1.1483	8.52058	25.0687	7.15703	17.0425	22.2669	30.8626	20.8737	1.63297	8.75415	4.02849	3.74721	5.38706	6.12018	13.9157	20.3454
ENSG00000006757	183.662	180.669	102.812	154.253	101.231	104.112	198.755	162.389	152.706	159.099	193.521	152.683	202.885	174.568	154.264	159.996
ENSG00000006788	0	0	0	0	0	0	0	0.960464	0	0	1.00439	0	0.960804	0	0.995214	0
ENSG00000006831	6231.79	4424.61	1916.41	2117.04	1946.16	2281.03	2719.89	3172.01	4859.54	5824.9	5035.89	5075.37	5346.07	5420.31	5467.56	4526.33
ENSG00000006837	56.2372	31.2527	16.393	13.1738	25.1723	10.3876	20.7516	20.5571	47.9038	56.7608	48.3169	54.0889	43.918	47.0765	49.2524	35.9477
ENSG00000007001	0	0	0	0	0	0	0	0	0	0	0	0	0	0	0	0
ENSG00000007038	0	0	0.990911	0	0	0	0	1.91536	0	0	0	0	0	0	0	0
ENSG00000007047	988.337	648.196	229.58	259.684	336.682	312.368	1564.82	1690.19	949.922	908.818	1031.42	828.295	928.259	788.288	990.673	648.086
ENSG00000007062	3.22561	0	1.23011	1.229	0	0	1.81471	1.19528	1.58658	1.22314	6.30974	3.88359	0.597751	3.70544	1.79605	1.2259
ENSG00000007080	884.738	1343.18	721.242	1011.78	716.096	856.379	901.853	937.868	706.894	782.5	1052.99	760.032	964.964	723.713	839.651	1250.35
ENSG00000007129	0.922864	0	2.72962	0	0	3.78036	5.60412	8.48929	0	0.91782	1.85079	0	0	0.927224	2.58844	0
ENSG00000007168	2433.21	2534.11	1535.06	1777.96	1497.58	1526.37	2035.13	2450.18	1857.26	2457.2	1770.36	2092.89	2148.33	1952.43	2056.86	2457.72
ENSG00000007171	42.1915	34.1859	60.7528	46.1172	38.7708	13.9559	98.4664	84.7648	24.6745	41.8836	28.2154	29.2972	30.8305	29.1936	28.9566	52.2478
ENSG00000007174	11.31	2.22472	7.70196	13.6027	5.67708	0	13.1408	9.13482	3.21718	15.0045	1.61175	10.3614	12.8783	2.45823	2.07158	7.09757
ENSG00000007202	9940.5	9148.94	6053.89	5378.85	5259.43	5220.78	5421.4	5836.7	9395.77	9766.7	8548.82	8256.63	7642.21	8514.91	9482.47	9448.82
ENSG00000007216	0	0	0	0	0	1.00959	0	0	0	0	1.02011	0	0	0	0.962744	0
ENSG00000007237	313.838	271.015	99.9366	113.65	106.771	83.3023	490.15	692.138	240.294	370.583	217.948	246.78	342.41	215.421	320.05	295.537
ENSG00000007255	232.834	90.0466	48.903	67.1075	63.9775	58.286	176.223	222.727	152.049	147.699	178.46	156.977	168.482	144.421	195.425	85.3297
ENSG00000007264	29.2018	21.8419	8.25566	11.8078	9.5674	8.56624	38.3912	39.3206	23.756	21.9165	23.1644	12.8819	23.0899	27.5682	15.7803	31.7006
ENSG00000007306	0	0	0	0	0	0	0	0	0	0	0	0	0	0	0	0
ENSG00000007312	0	1.94037	0.954098	2.90008	0.953578	2.63533	12.0161	6.76322	1.90596	0.962946	2.91138	0	0.923982	0	3.84645	0
ENSG00000007314	3.82805	11.4915	4.72249	2.86483	7.54706	4.7473	11.1475	22.0367	7.51917	31.6885	5.76043	8.65552	6.43022	8.62648	6.65919	9.59265
ENSG00000007341	512.27	505.379	431.073	450.432	500.816	495.527	356.882	532.806	454.532	510.527	439.29	411.477	518.693	500.645	498.92	443.872
ENSG00000007350	2.56825	7.07082	6.75648	6.83615	6.64472	0.849718	6.64489	4.10121	3.36602	14.2473	0.858679	1.72346	2.46062	6.00941	7.65756	4.26979
ENSG00000007372	0.505868	0	0	0	0	0	1.58706	5.31564	0	0	0	0	0	0	0	0
ENSG00000007376	573.052	594.264	345.117	358.127	306.575	322.414	300.858	312.621	437.681	476.891	653.471	509.494	459.508	422.215	504.113	554.058
ENSG00000007384	982.977	597.76	1398.26	1166.29	1570.2	1399.16	808.004	813.583	1070.36	900.552	1160.12	746.117	1065.17	739.993	1032.98	544.733
ENSG00000007392	1036.7	789.483	1179.67	1104.38	1429.09	1363.11	596.146	694.477	857.395	978.76	908.468	750.936	1109.55	825.408	949.107	795.414
ENSG00000007402	295.268	65.1894	50.5049	45.4086	138.853	66.5912	500.988	491.683	208.496	247.898	223.845	217.772	268.259	223.871	251.565	94.6489
ENSG00000007516	434.34	105.202	225.615	217.563	256.644	388.307	1039.73	1010.3	447.523	281.939	305.638	259.578	416.123	231.993	410.483	191.682
ENSG00000007520	961.026	953.837	494.493	552.195	511.476	483.764	611.225	660.885	673.239	808.714	948.821	838.463	961.571	766.037	794.205	935.905
ENSG00000007541	830.149	481.23	580.566	527.977	596.619	360.658	399.77	452.445	658.273	854.417	673.191	718.129	426.168	629.921	644.18	519.382
ENSG00000007545	1216.95	1157.09	1068.54	674.534	927.904	809.955	991.918	1063.93	1026.79	1083.07	1307.11	905.883	994.576	858.352	1077.92	1126.67
ENSG00000007866	975.747	1820.44	1402.28	1382.63	1289.05	1229.83	1870.12	1815.46	969.382	954.176	1077.91	849.597	997.084	835.994	1017.89	1857.38
ENSG00000007908	0	0.738878	0	1.39287	0	0	1.69711	0	0	0	0.74044	0	0	0	0	1.73673
ENSG00000007923	1131.74	1435.35	933.491	775.958	827.472	829.979	730.414	799.402	1078.56	1136.41	1024.87	939.534	1274.63	816.32	962.861	1476.07
ENSG00000007933	3.90095	3.36401	8.11324	3.97083	3.61115	6.4174	16.1354	4.0932	3.3834	4.5807	0.529438	8.4155	2.6056	2.45219	2.71707	5.58234
ENSG00000007944	389.841	323.914	219.37	235.845	199.489	217.692	468.264	485.471	552.61	314.674	551.435	287.904	485.239	337.325	551.833	253.949
ENSG00000007952	0	0	0	0	0	0	0	0	0	0	0	0	0	0	0	0
ENSG00000007968	1164.97	386.123	648.811	439.765	605.661	256.699	162.801	142.673	300.72	1060.17	248.47	869.666	268.784	990.126	367.652	714.498
ENSG00000008018	4261.62	4892.41	2921.83	3885.28	2769.43	2646.54	3628.45	4269.71	3642.4	3973.01	4326.52	3516.19	4144.29	3655.33	4173.47	4812.23
ENSG00000008056	28.7014	64.8133	14.6944	17.2039	17.4545	25.4065	111.177	86.1363	101.879	51.5469	80.5881	41.4694	97.0297	20.3368	84.79	32.7983
ENSG00000008083	1222.52	773.869	635.488	552.649	706.324	636.291	1127.9	1125.15	708.845	1132.95	685.648	944.832	758.937	968.578	824.588	906.583
ENSG00000008086	317.721	324.796	161.784	125.441	128.702	133.465	422.633	362.94	372.686	251.85	319.939	294.059	376.799	247.796	290.085	279.904
ENSG00000008118	22.3174	5.82921	4.78619	6.77988	0.956327	0	12.2385	19.5225	9.87583	19.8556	10.7057	19.5355	11.1551	16.5425	13.5011	2.90316
ENSG00000008128	564.391	543.621	1289.89	930.708	1162.3	886.426	533.641	651.268	742.7	571.365	864.109	422.01	778.475	380.339	622.715	514.194
ENSG00000008130	823.265	1021.01	835.911	742.745	865.016	633.485	521.336	592.88	646.183	757.039	686.46	646.592	560.467	744.717	688.682	1095.87
ENSG00000008196	0	0	0	0.998874	0	0	0.971612	0	0.983271	0	0	1.00622	0	0	0	1.0025
ENSG00000008197	0	0	0	1.27834	0	0	0.433052	1.21714	0	0	0	0	0	1.29012	1.26981	0
ENSG00000008226	4.21013	0	7.33726	2.61603	2.86111	0.720008	2.81726	2.81169	29.164	2.1606	5.97848	10.4872	13.2614	14.8385	23.4874	1.17159
ENSG00000008256	8995.11	3755.64	1993.37	2114.59	2106.26	1829.25	3396.79	4506.73	6015.99	8604.85	5701.82	6683.05	6929.66	7523.63	5947.38	4054.39
ENSG00000008277	320.324	161.237	137.251	137.049	146.737	143.795	428.85	469.789	188.582	281.962	194.221	278.814	237.038	309.184	211.774	193.866
ENSG00000008282	2402.9	2920	2335.86	2480.61	1906.76	2250.92	1980.48	2076.31	2403.18	2183.81	2470.92	2045.88	2651.51	2168.83	2561.31	2579.55
ENSG00000008283	1514.41	1420.52	1318.3	1099.41	1210.63	940.055	1139.11	1238.17	760.722	1444.24	840.161	1324.31	732.914	1344.46	928.852	1685.45
ENSG00000008294	4476.21	3370.93	2737	2410.82	2070.81	1864.02	4422.21	4800.75	4159.67	4268.03	3878.57	3518.48	4267.19	3665.95	4099.47	3217.88
ENSG00000008300	2205.37	700.065	958.168	746.367	1395.87	1126.18	969.384	1007.73	1430.92	1704.28	1632.13	1705	1174.49	1300.56	1617.45	851.751
ENSG00000008311	744.539	357.986	402.393	389.564	513.834	365.75	589.728	516.735	697.806	612.767	664.332	538.466	822.933	593.602	676.083	340.741
ENSG00000008323	2.72518	1.27103	1.87905	1.13012	2.69338	0	2.46387	5.56522	1.34079	1.35489	1.36641	1.91635	0	1.36853	2.70786	1.35104
ENSG00000008324	398.183	392.562	292.877	307.48	288.618	276.994	233.347	237.853	364.121	320.139	486.101	338.946	339.577	309.073	445.519	372.18
ENSG00000008382	303.78	189.419	142.493	166.568	203.765	86.2067	257.617	320.653	204.093	221.366	240.641	274.559	159.375	203.252	231.145	269.568
ENSG00000008394	576.963	357.655	586.761	565.212	531.906	461.718	364.466	502.398	343.893	752.809	372.104	574.325	521.417	590.956	515.321	464.048
ENSG00000008405	1121.99	1367.44	1159.52	1142.58	1070.53	859.686	1370.79	1550.8	1161.73	1075.83	1078.24	992.648	1273.7	968.015	1173.12	1383.16
ENSG00000008438	0	0	0.990748	0	0	0	0	0.957836	0	0	0	0	0	0	0	0
ENSG00000008441	1149.78	2135.56	433.65	666.745	392.79	528.256	1484.41	1295.9	972.139	1088.27	807.076	954.029	863.796	902.404	1116.04	2229.24
ENSG00000008513	3010.17	2157.43	1067.84	984.019	1148.36	1078.4	2207.93	2385.02	2678.41	3016.62	2716.42	2558.32	2380.45	2432.31	2492.41	2052.28
ENSG00000008516	13.3301	16.0113	20.6709	13.3038	12.263	7.05509	25.7134	13.9635	31.0217	13.2338	28.5258	10.7259	17.8958	13.3595	35.0069	13.3276
ENSG00000008517	421.647	4162.34	2683.69	4070.34	2186.23	2369.65	3366.85	3816.26	829.598	382.992	916.133	336.955	867.603	257.245	721.21	3735.87
ENSG00000008710	2193.21	1652.72	2781.14	1885.61	2389.02	1873.92	1666.28	1199.66	1357.48	1766.97	1604.68	1375.22	1339.97	1500.91	1485.4	1992.38
ENSG00000008735	9.29083	6.03843	7.97762	8.55365	1.98858	6.87724	29.2652	13.3297	9.55998	4.00925	8.94503	7.13142	2.24052	3.86314	6.54859	8.05697
ENSG00000008838	1154.41	1069.43	1752.08	1382.55	1483.54	1314.07	1067.13	1304.41	1071.72	1185.35	1143.7	963.312	919.686	1059.9	965.74	1166.94
ENSG00000008853	1164.5	525.344	226.95	277.511	202.294	210.22	449.024	485.366	852.57	936.187	766.719	876.318	696.896	908.892	855.078	543.968
ENSG00000008869	791.548	993.908	1458.59	1150.17	1227.79	976.227	663.535	774.946	783.17	801.343	652.859	723.264	646.484	677.734	693.003	821.513
ENSG00000008952	2886.55	2114.84	1210.73	1475.22	1054.48	1323.3	2238.21	2590.34	2622.53	3109.06	2632.74	2636.65	3549.45	2390.84	2886.91	1950.31
ENSG00000008988	21298.8	25359.4	10908.6	15406.3	12447.6	12566.9	21795.2	25442.5	23942.3	20159.3	27483	17679.1	30331.6	17484.5	26857.5	24454.4
ENSG00000009307	30310.6	31729.9	13215.8	14002.8	13072.8	12934.9	27193	32092.1	23399.5	28397.3	21802.7	25506.4	27791.6	24809.9	26727.2	35503.7
ENSG00000009335	1174.68	1712.84	831.607	793.564	696.231	719.422	908.899	1055.97	1324.29	1284.94	1114.6	1067.68	1288.95	1052.81	1035.61	1455.6
ENSG00000009413	438.693	528.859	664.543	428.87	504.01	513.628	310.962	441.06	413.688	427.239	271.729	221.831	359.551	374.538	374.14	444.589
ENSG00000009694	11.9948	22.03	20.7443	23.9672	23.6787	9.92872	51.4933	36.4981	10.8108	16.8807	6.02434	20.1092	9.60977	13.028	12.9337	25.1016
ENSG00000009709	337.611	265.095	124.133	135.181	129.745	128.846	307.214	374.658	208.11	253.153	200.288	230.107	279.914	237.919	271.378	313.36
ENSG00000009724	0.982881	0	1.13792	3.03343	0.889559	5.92342	1.96534	0	0	0	2.03186	1.01998	1.94011	1.01606	1.00668	2.01993
ENSG00000009765	18.1669	6.2198	39.2872	20.1282	19.3725	15.274	7.82509	6.25273	11.8887	8.62991	11.1352	19.3247	7.15613	4.2954	6.99632	10.9345
ENSG00000009780	200.519	192.153	171.361	184.104	186.25	111.177	217.361	224.726	154.337	214.7	160.129	193.553	201.637	194.876	213.974	167.741
ENSG00000009790	4.17535	1.86406	0	0	1.2398	0	1.79422	0	0.322453	0.837656	1.76589	2.36276	1.68035	4.70386	2.30285	0
ENSG00000009830	1803.32	1318.76	1464.36	1273.16	1644.75	1351.79	898.541	983.919	1674.55	2066.81	1670.78	1631.56	2005.92	1821.84	1708.31	1369.81
ENSG00000009844	2084.17	2250.86	1031.13	1347.15	1012.9	1060.85	1598.46	1933.95	2076.93	2177.56	2218.05	1778.53	2351.28	1814.2	2159.07	2232.21
ENSG00000009950	19.0819	14.636	17.1744	18.5918	18.7522	17.7018	27.6309	17.7964	31.3309	21.233	24.9981	13.2546	9.4416	14.7374	17.8257	8.90682
ENSG00000009954	6976.74	5391.81	3349.97	2827.24	3096.34	2871.91	3346.64	3513.59	3684.82	7130.74	3440.31	5599.49	4108.22	6027.52	4057.33	6629.58
ENSG00000010017	984.627	1241.58	1039.52	888.948	852.01	824.909	1300.66	1490.31	898.36	1105.33	1007.08	955.199	1001.54	946.987	1011.73	1258.74
ENSG00000010030	16.7509	44.9541	26.6947	39.4913	7.51239	23.0204	22.1491	23.6706	10.7553	12.881	7.81077	11.9224	10.4349	17.8862	14.4384	24.8272
ENSG00000010072	601.409	833.956	455.851	469.671	406.559	390.683	625.917	847.736	729.253	629.661	685.387	490.762	747.42	525.352	676.447	755.45
ENSG00000010165	1040.66	1285.19	1226.64	1003.71	952.603	919.886	1054.56	1098.21	1407.23	1058.48	1408.06	833.26	1287.01	951.633	1249.75	1390.29
ENSG00000010219	526.007	537.093	492.839	488.965	532.931	473.395	749.709	866.062	395.269	527.191	455.196	402.169	521.512	364.107	470.837	726.537
ENSG00000010244	6181.62	6496.86	4390.42	4655.71	4089.95	4158.38	4026.24	4708.45	6362.4	6151.07	6156.38	5528.89	5951.62	5692.13	6479.73	6675.65
ENSG00000010256	3833.12	3972.97	2733.91	3407.87	2556.85	2343.04	3960.27	4336.5	3797.19	3781.77	4123.92	3820.21	3677.42	3414.18	3921.33	4144.21
ENSG00000010270	1816.19	1719.86	1155.2	1117.68	918.056	909.736	1502.4	1840.2	1637.5	1723.01	1760.64	1504.63	1884.91	1567.09	1732.88	1660.64
ENSG00000010278	4728.13	2752.46	3799.91	4400.67	4874.63	3791.11	3599.36	4432.72	3383.52	4548.78	3957.36	4238.77	4288.91	4237.54	4113.15	3328.99
ENSG00000010282	1.62067	1.98075	1.72661	4.29844	0	0	0	0	0.666995	1.76	5.27852	0.718963	0.612496	0.99506	1.74322	0
ENSG00000010292	18038.4	7830.71	5422.57	5439.29	5484.16	4752.82	7163.66	7333.89	12883.4	15852.9	12331.3	13833.5	13223.6	14484.1	14663.8	9483.9
ENSG00000010295	63.9298	84.0264	68.875	86.8314	57.9709	47.1004	57.3513	77.5445	131.826	84.0905	160.088	49.7028	135.096	61.4553	125.424	51.3388
ENSG00000010310	50.5446	24.7854	77.65	63.4445	59.3427	42.4689	180.271	181.36	53.0455	62.412	50.4638	32.4785	74.5011	30.4835	52.1502	24.1768
ENSG00000010318	261.428	159.754	95.9013	107.474	102.294	100.652	273.615	275.653	240.506	248.253	222.693	200.871	314.899	209.003	285.125	152.022
ENSG00000010319	355.379	60.3995	68.1217	70.6787	100.741	71.1649	124.427	122.956	179.613	257.529	271.124	299.952	256.636	259.059	237.033	96.9182
ENSG00000010322	1883.13	1959.3	3005.45	2405.25	2801.28	2246.69	1975.97	2148.95	1298.86	1809.77	1392.69	1386.62	1334.78	1553.55	1342.06	2246.31
ENSG00000010327	1.9137	0	1.59294	3.77643	4.27774	2.54798	0	2.05321	2.936	3.80498	0.996992	2.58477	0	1.28739	7.98947	0
ENSG00000010361	270.074	87.8615	53.8196	67.5863	110.964	123.142	142.624	126.591	162.17	297.557	191.186	249.362	197.723	217.482	228.383	143.314
ENSG00000010379	11.0514	2.61758	23.9554	17.1116	18.4303	24.829	2.32013	4.86925	4.53818	9.76191	17.4796	7.63675	9.0377	15.5569	6.7032	2.60138
ENSG00000010404	5224.78	5862.33	1844.37	2218.85	1545.36	1773.2	5471.94	6169.95	5399.8	5088.24	5042.73	4778.7	5438.32	4126.03	5123.99	6092.63
ENSG00000010438	0	0	0	0	0	0	0	0	0	0	2.00794	0	0	0	0	0
ENSG00000010539	568.276	720.237	640.721	508.212	520.935	493.57	388.975	456.478	704.595	538.512	705.053	452.177	783.836	488.334	737.69	533.05
ENSG00000010610	3.23958	0.810745	0.799068	1.61668	1.17695	0	0	1.14378	3.18367	6.43351	10.6815	2.8504	3.88165	1.19802	1.60992	0.808935
ENSG00000010626	751.425	325.043	162.317	233.408	143.754	168.982	470.887	518.266	575.761	698.558	614.74	641.757	818.383	638.251	739.796	287.828
ENSG00000010671	8.85701	0	0.971867	3.15246	1.55647	0.78368	7.0076	0.943736	7.97375	0.905507	3.16798	0.794607	3.78347	2.96461	3.13908	0.909116
ENSG00000010704	6.02038	5.2688	14.6174	8.11107	12.5308	7.16314	10.2063	7.04021	13.3882	6.42576	14.2561	6.56526	8.19495	5.99014	12.8086	9.77363
ENSG00000010803	1555.05	845.308	737.291	668.583	752.041	647.878	1065.9	1028.53	683.309	1263.38	651.649	1238.62	843.103	1236.12	642.535	1075.99
ENSG00000010810	549.031	667.065	375.159	353.404	407.118	374.705	1165.46	1133.73	492.162	523.714	499.213	548.529	786.974	437.658	700.003	667.027
ENSG00000010818	1298.8	1210.54	623.003	660.048	498.289	682.878	1672.42	2415.83	1832.11	1146.25	1041.08	903.842	1472.66	812.769	1192.1	1415.38
ENSG00000010932	0	0	0	0	0	0	0	0	0	0	1.00396	0	0	0	0	0
ENSG00000011007	1852.63	3068.09	1463.78	1647.77	1397.23	1472	1414.89	1520.31	2570.75	1821.93	2806.22	1549.42	2375.69	1481.51	2504.22	2571.57
ENSG00000011009	1358.45	2010.55	1136.93	1329.19	1120.86	1055.05	1357.15	1445.49	1365.16	1198.38	1623.41	1106.99	1246.87	1039.92	1308.17	1856.94
ENSG00000011021	1314.87	851.275	1869.02	1001.04	1535.68	1222.26	548.065	611.757	673.65	1226.64	670.124	947.049	742.898	1060.46	799.279	969.586
ENSG00000011028	16506.1	7378.94	6203.12	6118.35	7910.77	6600.8	11103	11111.2	12745.9	13005.3	13340.1	12884	12841.3	11738.7	12867.3	7197.28
ENSG00000011052	805.364	1151.34	149.171	316.26	143.908	432.113	762.401	1083.3	1425.24	1088.67	1666.64	651.55	1915.62	837.273	1414.95	1854.65
ENSG00000011083	0	0	0	0	0	0	0	0	0.982959	0	0	0	0	0	0.994327	0
ENSG00000011105	1762.66	1321.31	565.63	682.036	645.728	629.923	1693.63	1905.02	1598.26	1697.41	1880.57	1461.35	2048.31	1387.24	1860.35	1176.68
ENSG00000011114	1229.04	950.87	361.055	392.311	385.623	515.277	1035.04	1063.85	1009.97	1318.98	997.66	1050.47	969.585	1011.52	899.331	1096.54
ENSG00000011132	187.309	286.029	192.654	255.853	235.883	257.506	258.257	289.591	215.333	165.378	242.618	162.928	236.418	171.503	249.051	254.306
ENSG00000011143	701.634	375.999	355.794	292.386	471.844	388.836	348.155	430.793	582.475	566.094	469.422	549.696	624.597	542.141	499.168	406.667
ENSG00000011198	610.515	747.065	406.831	426.959	335.002	394.951	350.852	402.138	622.672	590.484	741.191	548.282	721.086	534.967	729.454	733.356
ENSG00000011201	935.99	1457.64	717.326	830.988	985.189	948.419	2871.8	3376.99	1543.67	894.944	1558.5	742.24	1446.14	689.085	1272.92	1097.78
ENSG00000011243	975.825	822.468	1204.05	935.497	1005.14	853.886	1579.25	1743.46	1073.44	854.53	1021.46	611.315	1192.1	693.034	885.306	829.95
ENSG00000011258	855.789	537.62	581.834	393.838	471.036	432.071	372.339	386.799	619.658	755.938	592.007	668.478	618.882	670.711	662.803	383.383
ENSG00000011260	1678.07	1910.94	1425.52	1264.08	1265.13	1248.87	1368.71	1710.5	1260.02	1752.14	1288.93	1582.17	1577.6	1475.53	1477.2	1759.26
ENSG00000011275	5605.68	3876.65	1810.49	2006.17	1654.67	1707.58	3546.88	3991.23	4563.2	5680.87	4456.77	4764.75	4657.16	4863.05	4717.89	4036.82
ENSG00000011295	420.036	407.07	559.338	401.622	455.194	461.26	346.681	434.737	336.334	371.604	379.182	316.975	384.804	383.156	358.769	481.405
ENSG00000011304	8148.03	9994.26	4385.34	4570.2	4049.19	4300.76	5810.59	6205.16	7747.44	6360.92	8313.6	7309.23	8226.06	6901.17	7652.51	8666.2
ENSG00000011332	87.8425	60.9673	42.492	35.3911	103.881	68.1032	120.944	119.126	128.235	78.3782	106.214	63.8387	125.203	66.3081	122.79	62.1906
ENSG00000011347	131.571	114.34	120.707	134.348	146.682	74.5102	476.755	538.239	109.139	141.96	130.066	114.152	129.031	98.8046	163.429	139.689
ENSG00000011376	933.787	1071.57	768.836	646.626	628.465	670.147	854.333	841.256	840.043	972.571	829.885	766.415	965.706	779.597	779.884	1146
ENSG00000011405	4462.52	4001.26	1614.43	1692.32	1913.72	1688.05	3345.58	4089.8	3069.79	4604.06	3179.69	3245	3186.5	3723.39	3444.84	3970.11
ENSG00000011422	1588.65	1410.21	1321.43	1578.38	1601.28	1632.94	1961.77	2273.44	2387.81	1504.54	2841.88	1298.03	2239.27	1351.78	2267.3	1332.32
ENSG00000011426	15865.1	11171.4	8303.45	7925.79	7257.24	7424.46	10889.3	12621.8	11893.6	17637.6	9953.21	12864.4	18202.3	15515.6	12566.7	11632.4
ENSG00000011451	538.084	561.051	312.69	219.693	311.592	236.123	363.648	309.972	430.825	349.432	558.059	427.68	378.088	412.538	468.749	436.878
ENSG00000011454	1338.9	1162.63	1049.07	777.891	787.937	838.936	1383.45	1525.17	1178.61	1340.01	1006.92	1247.71	1659.29	1147.2	1218.09	1184.87
ENSG00000011465	3.79566	4.33316	0	4.49802	1.07803	4.67405	2.2167	9.2117	0.92898	11.5459	6.59641	1.97654	1.35646	3.9373	3.28313	3.82267
ENSG00000011478	565.477	438.48	401.373	385.159	511.933	456.618	524.061	584.797	449.605	474.332	585.077	440.029	521.76	457.783	615.763	472.541
ENSG00000011485	2786.17	1978.88	1417.4	1459.17	1685.98	1340.03	2096.47	2336.92	1869.92	2582.83	1687.37	2029.54	2209.84	1976.51	2121.09	1927.41
ENSG00000011523	1030.51	579.053	359.137	368.678	416.79	362.165	1047.69	1126.36	635.333	878.706	733.116	825.185	730.869	800.756	770.044	661.65
ENSG00000011566	1454.36	1241.03	1313.72	847.799	1011.97	1034.35	1244.07	1386.85	1003.92	1425	1108.83	1295.28	1159.3	1265.9	1283.58	1142.23
ENSG00000011590	0	0	0	0	0	0	0	0	0	0	0	0	1.96012	0	1.95168	0
ENSG00000011600	0	0	0	0	0	0	0.970277	0	0	0	1.00529	0	0	0	0	0
ENSG00000011638	542.086	392.653	235.582	252.084	182.288	207.343	580.406	648.41	385.504	531.571	446.89	430.524	463.448	380.399	536.132	392.955
ENSG00000011677	705.584	379.822	211.521	228.245	237.093	240.178	622.299	693.127	493.568	529.037	449.727	611.505	496.527	469.076	393.952	562.097
ENSG00000012048	3007.23	1337.7	881.923	665.006	737.719	690.339	624.083	650.244	1216.27	2878.28	1201.22	2224.89	1761.88	2721.41	1423.04	2036.61
ENSG00000012061	2286.03	2081.99	1069.98	1455.14	1261.53	1254.77	2294.09	2368.85	2798.15	2109.5	2935.36	2046.96	2628.85	1852.71	2683.17	1721.83
ENSG00000012124	140.985	45.2932	70.3722	78.097	37.9914	46.5692	98.0959	109.834	133.962	87.0885	133.205	53.0625	183.8	46.4336	125.867	13.241
ENSG00000012171	869.618	370.262	607.763	493.054	729.725	640.74	540.268	519.554	670.734	717.499	755.641	670.667	607.739	788.795	772.357	488.303
ENSG00000012174	577.485	557.721	191.834	239.504	156.811	213.066	355.881	430.199	452.178	444.714	403.024	430.944	392.957	453.635	427.519	476.987
ENSG00000012211	365.067	579.451	386.493	352.29	312.062	338.613	510.792	581.459	551.679	355.866	539.298	281.32	474.425	296.215	567.519	597.24
ENSG00000012223	14.3077	59.9084	35.5778	27.2291	5.32862	27.1102	11.4486	67.4823	5.31458	0.671228	13.0682	1.36059	2.58994	13.9653	2.68671	12.8078
ENSG00000012232	3316.12	3744.14	1861.6	2017.47	1597.41	1468.99	4333.13	3825.43	3039.87	2736.65	2877.67	2882.37	3288.85	2725.14	3067.9	3895.55
ENSG00000012504	0	1.17957	0	0	0	0	2.15835	0	0	0	0	0	0	0	0	1.16809
ENSG00000012660	6284.3	5900.33	3928.37	3781.87	3539.5	3477.28	5932.01	6966.54	4417.75	6324.55	4564.8	5476.8	5289.03	5579.12	5052.15	6245.89
ENSG00000012779	981.227	752.308	722.608	831.783	336.823	454.407	1152.9	1151	869.348	956.914	1122.58	698.042	1100.03	749.372	1092.38	641.286
ENSG00000012817	0	0	2.18125	0	0	2.20091	0	0	0	0.284663	0	0	0	0	0	0
ENSG00000012822	1316.21	1408.58	1249.28	1204.54	822.568	762.337	2892.55	3404.58	1461.25	1040.2	1474.67	1119.64	1828.28	1085.87	1540.84	1323.57
ENSG00000012963	1519.06	715.099	325.094	331.413	398.996	378.331	760.275	822.542	1025.16	1452.03	1218.29	1249.83	1235.53	1220.74	1201.21	962.633
ENSG00000012983	2724.96	2708.35	2370.99	1888.93	1937.17	1690.08	2132.86	2823.32	2131.46	2758.09	2074.9	2593.84	2731	2300.83	2264.58	2456.78
ENSG00000013016	709.604	818.359	257.78	363.563	281.166	304.882	1392.97	1505.11	689.227	645.716	695.773	561.492	652.92	606.671	649.634	813.484
ENSG00000013275	2926.55	2743.2	1593.21	1843.74	2036.25	1979.46	2180.64	2439.62	2841.87	2735.1	3063.99	2451.19	2649.49	2371.61	3058.46	2726.17
ENSG00000013288	1248.85	930.52	833.515	711.82	661.073	677.357	979.46	929.203	1017.45	1154.68	1112.86	1062.3	1127.2	1030.05	1074.64	902.938
ENSG00000013293	9.80272	18.2276	35.2311	32.5634	26.095	18.5193	11.7009	0.545813	32.5018	5.94732	9.93596	18.0754	8.46558	5.00965	32.4124	25.8546
ENSG00000013297	5.73254	2.85983	27.8447	14.7699	10.3177	16.3136	3.6929	1.82246	2.68453	10.1483	2.86369	12.7665	2.92145	4.02786	2.83759	15.2003
ENSG00000013306	5610.73	5292.34	4849.31	4539.24	4821.51	3718.49	4556.37	4922.27	4443.75	4919.05	4907.84	4658.11	3974.43	4515	4726.15	5860.44
ENSG00000013364	4675.85	3619.06	2363.93	2641.49	1994.43	1777.19	4727.5	5668.79	3544.26	4099.77	3689.21	3646.8	5132.43	3808.79	3911.1	3691
ENSG00000013374	562.114	671.985	252.244	375.944	221.594	228.509	796.462	998.252	508.698	492.578	481.678	492.476	754.553	433.525	597.099	560.663
ENSG00000013375	996.039	1344.47	838.072	794.854	851.055	683.313	1543.43	1696.88	799.565	944.524	913.562	765.103	949.676	868.747	968.662	1306.32
ENSG00000013392	137.823	157.262	122.989	151.834	124.355	101.311	214.622	251.017	156.046	134.083	172.773	145.95	173.736	146.286	163.296	135.113
ENSG00000013441	754.235	1004.87	3105.48	2606.13	2761.96	2622.78	833.763	974.032	1480.18	782.46	1447.36	683.49	1618.82	607.629	1463.39	686.469
ENSG00000013503	387.862	539.83	323.626	363.561	286.49	333.236	242.054	257.054	271.084	402.562	262.009	299.189	295.514	335.526	349.178	574.933
ENSG00000013523	752.432	695.632	424.068	436.921	356.168	366.387	809.222	880.975	793.328	731.795	825.143	538.751	748.65	638.91	896.965	679.746
ENSG00000013561	781.967	893.113	333.584	433.504	273.996	338.459	629.794	776.137	779.548	730.264	732.556	614.246	879.917	708.811	803.217	850.97
ENSG00000013563	1112.97	807.87	712.438	761.145	663.987	660.33	1423.93	1647.19	887.918	952.853	848.179	955.875	973.81	912.359	985.3	823.709
ENSG00000013573	3756.8	2276.84	5151.22	3354.96	4164.72	2885.22	2132.83	2170.62	2164	3427.47	1931.89	2575.04	2072.03	3128.94	2191.33	2636.95
ENSG00000013583	1122.98	891.07	586.749	654.877	511.491	468.28	1051.72	1080.82	753.492	987.688	857.36	1019.35	856.231	979.722	871.576	1055.67
ENSG00000013588	4756.47	4098.5	2460.18	2876.35	2417.72	2287.09	3166.75	3415.05	3963.19	4734.32	4155.7	4427.55	2789.97	3613.73	3252.61	4488.5
ENSG00000013619	332.425	347.156	307.899	206.582	359.513	344.738	328.878	320.618	362.273	336.169	373.275	287.08	350.584	241.424	339.566	391.242
ENSG00000013725	1.05231	1.23651	2.05866	2.09606	2.05471	2.07994	0	0.994623	1.99503	1.04521	2.04402	0	2.58331	0	0	0.999148
ENSG00000013810	4128.54	3015.61	2990.09	2540.77	2892.46	2699.32	1783.47	1814.4	2733.16	3691.58	3031.79	3105.55	2738.85	3477.35	3269.13	3617.1
ENSG00000014123	836.164	846.716	514.071	593.718	528.502	546.306	900.423	1038.58	776.111	752.761	738.586	685.841	837.85	643.778	735.37	773.969
ENSG00000014138	950.347	806.089	732.568	657.233	758.933	401.905	491.867	631.537	379.815	1054.99	359.981	863.164	432.735	800.374	521.413	998.44
ENSG00000014164	1074.49	983.267	603.902	641.61	639.523	611.447	799.098	838.831	793.591	906.326	915.422	961.17	734.307	913.948	843.091	875.357
ENSG00000014216	2841.29	3240.41	1954.61	2070.8	1554.14	1636.87	2671.37	2716.15	2093.14	2545.91	2431.45	2181.56	2098.69	2050.37	2334.16	3482.11
ENSG00000014257	0	0.910532	0	3.21082	3.16009	0	0	2.41218	2.90006	0	6.63975	1.3069	0.435976	0.454107	3.39238	0
ENSG00000014641	4498.72	5226.88	4792.11	5576.43	4797.19	4288.29	4544.48	5611.8	4151.57	4295.85	4478.25	4102.47	4326.65	3981.06	4710.13	5418.57
ENSG00000014824	2488.91	1777.56	803.109	987.087	780.4	884.735	1867.27	2020.22	1924.04	2283.59	1987.84	2157.45	2544.79	2279.47	2183.59	1640.22
ENSG00000014914	826.925	472.269	775.097	626.391	662.341	478.239	825.749	862.944	451.292	680.791	456.204	594.02	456.237	672.262	435.943	651.554
ENSG00000014919	1305.57	936.719	584.87	668.593	537.997	602.883	624.383	718.221	969.789	1191.29	1005.09	1110.26	878.443	1035.8	1070.43	993.295
ENSG00000015133	9.68098	4.60037	1.51143	1.22477	29.0311	1.8265	16.9793	0.588739	1.20545	2.43587	3.07308	1.54118	0.588989	6.14227	0.610015	6.07828
ENSG00000015153	443.699	566.086	426.199	450.19	387.209	391.55	545.905	680.376	399.837	477.849	378.157	394.313	559.99	369.065	411.09	494.585
ENSG00000015171	996.3	832.101	389.054	348.475	399.39	385.264	714.389	654.939	732.278	911.101	615.244	807.444	920.229	759.02	721.859	954.744
ENSG00000015285	3.21935	2.4183	3.57718	8.75337	2.51708	3.19624	3.12272	5.10712	3.16604	0.799763	3.3688	1.6218	4.62178	3.23068	5.48006	5.4049
ENSG00000015413	0	0	4.01292	0.813211	0	0	0.702157	0	3.88886	0	1.63358	0	0.778987	0	2.42802	0
ENSG00000015475	352.497	373.916	267.659	192.487	254.505	174.024	286.448	363.072	383.583	389.413	424.854	309.163	432.684	247.457	341.198	340.465
ENSG00000015479	14332.1	10070.4	6291.86	6529.1	4936.87	4915.23	8955.16	9953.23	10262.7	15236.5	8643.84	11709.5	13204.5	12503.6	11052.2	9618.95
ENSG00000015520	2.67651	3.28815	4.61118	4.66323	3.01177	6.49125	1.81411	3.4228	8.26271	2.17414	8.43752	1.10126	3.15098	1.82398	8.36053	1.87091
ENSG00000015532	1413.4	1023.07	981.337	1094.28	1097.12	818.289	1035.16	1142.89	1051.29	1256	1214.09	1153.85	1131.62	1095.26	1161.63	972.641
ENSG00000015568	508.993	382.485	452.849	535.957	218.851	456.241	73.7823	713.453	127.475	399.124	558.877	135.079	348.934	142.15	280.34	376.527
ENSG00000015592	0	1.70316	0	0.841601	2.14037	0	1.2198	4.87992	2.1404	1.0814	1.08913	1.72113	2.41473	0.84685	1.0792	0
ENSG00000015676	3892.37	2496.13	1305.66	1243.32	1118.8	1029.19	2527.07	2910.8	2929.1	3943.68	2644.19	3516.13	3088.11	3228.39	2770.65	2819.79
ENSG00000016082	3.83223	0	4.16793	0	2.83268	0.950974	0.929509	1.83569	0.941792	5.70956	0.960917	3.97589	0.917778	5.76501	3.80866	0.955311
ENSG00000016391	111.05	68.8857	74.7754	67.6275	63.8518	54.9711	82.6057	91.9455	44.5945	96.5063	108.123	81.2562	101.898	156.544	71.1349	91.8116
ENSG00000016402	7.14417	4.46958	3.52452	7.52062	1.76042	0	1.73322	2.56827	0	6.20647	19.9875	1.79664	2.56863	3.58038	8.87611	1.78495
ENSG00000016490	0	0	0	0	0	0	0	0	0	0	0	0	0	0	0	0
ENSG00000016602	0	0	0	0	0	0	0	0	0	0	0	0	0	0	0	0
ENSG00000016864	1145.81	986.986	1187.92	1129.68	1219.75	979.95	1225.98	1333.49	796.503	1129.19	872.755	1003.56	1008.1	1004.08	959.368	1029.43
ENSG00000017260	2667.9	2176.64	3046.33	2237.61	2235.73	2055.28	2228.93	2381.64	2184.73	3153.4	1899.98	2330.88	2725.84	2637.84	2094.08	2215.95
ENSG00000017427	4.42442	2.60261	0	4.63582	3.46783	4.34923	1.68767	10.3247	2.56219	10.7385	2.66023	0.879693	0.836926	0	0	0.942031
ENSG00000017483	5.44979	21.0776	19.7835	22.5269	10.825	23.7807	3.96494	12.4013	11.8496	6.4199	28.0868	30.1901	13.746	4.10091	9.47795	12.2328
ENSG00000017797	3988.87	4868.48	1553.3	1730.9	1707.02	1754.45	5196.07	5820.43	3383.46	4341.96	3045.97	3582.64	4131.45	3530.99	3333.56	5207.06
ENSG00000018189	1260.85	1139.76	2294.54	1671.27	1892.68	1678.17	1250.77	1464.47	1151	1334.97	1045.11	955.842	1230.75	979.962	1269.2	1086.7
ENSG00000018236	1465.88	35.6337	43.767	84.1101	30.6461	27.1462	320.214	433.864	620.869	1570.15	615.475	1687.63	771.496	1286.35	715.745	49.3207
ENSG00000018280	30.6021	9.59555	15.9423	12.0128	15.8995	25.3398	15.5663	17.6342	13.2244	5.83526	19.8021	37.7298	25.7746	12.3671	19.2243	6.27732
ENSG00000018408	1664.65	1037.06	415.063	556.063	288.875	382.855	1515.97	1485.32	1723.94	1633.05	1832.33	1338.95	1924.25	1208.81	1509.45	1017.33
ENSG00000018510	5158.23	4765.52	1896.47	2156.55	1714.43	1764.13	4031.4	4726.67	2667.21	4675.47	2612.7	4722.6	3509.96	4436.03	3079.75	4933.31
ENSG00000018607	1.00184	0	1.16622	0	0	0	1.94345	0.959259	0.985321	0	0	0	0.958682	0	0	0
ENSG00000018610	393.631	456.612	197.963	222.023	203.127	256.077	380.085	355.192	336.723	415.008	335.912	337.98	389.035	329.753	346.853	416.556
ENSG00000018625	41.0844	29.7167	63.5342	39.6268	22.8517	27.0006	38.5593	65.4	30.0381	33.515	39.4961	25.5364	40.0498	45.098	25.8751	49.6856
ENSG00000018699	578.31	1121.78	557.49	723.051	567.022	717.293	669.664	789.004	527.034	716.424	538.579	486.423	537.175	509.465	536.364	975.327
ENSG00000018869	60.2521	33.1713	32.2705	20.4349	38.0235	34.0476	21.0836	23.7394	29.763	59.761	77.521	57.7523	60.8355	38.5385	83.7963	28.7949
ENSG00000019102	0	0	1.97435	0	0	0.994858	0	0	0.98601	0	1.0041	0	0.956038	0	0.994943	0
ENSG00000019144	4172.16	3748.86	4367.3	3608.35	3945.61	3697.92	3025.76	3092.18	3099.24	3751.44	2989.53	3330.02	2994.94	3203.18	2981.21	4328.6
ENSG00000019169	48.8011	206.79	191.676	191.012	81.0191	87.9338	213.012	220.124	151.364	59.6842	214.596	48.2242	235.182	62.1587	179.997	189.985
ENSG00000019186	338.256	236.594	133.108	197.894	332.341	235.445	916.143	847.078	316.952	358.658	293.429	294.766	320.231	316.862	388.734	417.396
ENSG00000019485	395.394	471.507	178.712	251.486	211.954	221.152	311.074	261.931	490.148	402.626	477.71	339.472	480.125	407.993	534.392	370.848
ENSG00000019505	1.48845	9.80866	6.15836	4.8904	3.86541	1.10281	56.9218	21.6214	5.56923	3.31053	4.91669	2.95595	2.82107	2.94575	3.78994	6.86901
ENSG00000019549	344.696	199.23	106.121	89.2472	111.209	121.614	495.226	543.982	775.362	387.013	659.539	299.469	807.506	317.411	680.939	221.99
ENSG00000019582	1.40919	0	2.77784	2.81475	0	3.35212	0.265405	1.55961	3.21837	1.40389	1.96407	4.10688	1.15375	0	0.810842	0
ENSG00000019991	0.985746	0	0	0	1.32615	0	0	1.88925	0.968859	0.439097	0	0.889516	1.88925	0	5.0405	5.56622
ENSG00000019995	2105.59	1639.55	1124.43	1174.48	1067.3	1069.76	1725.17	2158.8	1859.07	2396.52	1830.2	1901.02	2053.62	1860.37	2061.95	1696.02
ENSG00000020129	767.583	1075.44	485.716	538.843	456.982	495.173	632.868	593.7	719.139	751.396	838.967	587.31	633.855	591.853	652.243	995.938
ENSG00000020181	819.191	230.871	208.533	233.532	260.853	200.844	696.403	622.281	505.424	670.92	611.817	634.818	542.555	650.06	575.344	382.124
ENSG00000020219	0	0	0	0	0	0	0	0	0	0	0	0	0	0	0	0
ENSG00000020256	942.435	1172.18	598.289	696.688	715.47	653.902	1231.65	1436.71	651.631	957.772	763.927	790.596	735.047	765.568	694.064	1190.12
ENSG00000020426	1068.93	996.312	573.002	625.735	620.383	598.925	1084.66	1245.44	870.281	1163.96	969.819	937.282	1149.86	1012.65	990.926	1019.5
ENSG00000020577	3304.39	4041.84	2901.91	2453.07	3052.68	2844.44	4354.06	4438.59	3602.08	3549.33	3561.89	2921.23	3298.72	2819.92	3536.94	3980.08
ENSG00000020633	246.984	252.303	86.7484	101.525	75.8384	80.5878	160.664	122.15	138.578	168.539	150.073	115.189	161.351	157.28	240.004	197.401
ENSG00000020922	1305.22	1402.01	1324.15	1293.81	1230.47	1075.33	1013.83	1174.64	941.486	1371.87	819.251	1163.74	1210.92	1304.66	1006.1	1581.71
ENSG00000021300	237.034	129.27	89.0601	100.758	67.9588	47.2455	306.537	323.825	75.446	147.592	66.9165	169.634	110.242	153.97	76.9455	160.521
ENSG00000021355	801.178	595.01	292.569	373.878	246.652	239.019	749.189	1056.57	608.112	626.281	748.605	760.537	796.223	634.603	777.009	561.132
ENSG00000021461	0.835887	1.67413	4.00527	2.9523	0	5.11993	2.43396	0.800363	0	2.50205	0	0	7.38531	1.26405	0.677546	0.831297
ENSG00000021488	9.26568	5.06228	16.6733	8.49668	18.8577	12.545	7.44254	5.55159	0.936429	12.798	5.06862	2.54656	8.54271	11.9071	6.97927	2.83518
ENSG00000021574	1459.68	992.022	323.115	345.275	403.132	361.62	1013.19	1103.74	933.094	1398.53	809.163	1226.77	1073.48	1274.01	1105.45	1162.64
ENSG00000021645	331.127	295.44	235.4	170.916	260.263	219.064	316.278	256.788	207.554	381.832	266.008	351.364	212.417	302.173	282.74	350.542
ENSG00000021762	911.115	590.422	711.775	623.472	767.687	656.017	992.752	1017.04	512.633	888.239	554.768	874.316	630.189	673.079	584.207	692.838
ENSG00000021776	1374.85	1280.19	1723.38	1569.11	1550.02	1357.22	1172.97	1231.78	1070.03	1503.14	1017.9	1180.37	1130.6	1114.79	1108.3	1444.69
ENSG00000021826	1152.09	698.445	782.715	757.211	790.164	629.36	520.67	517.517	874.531	1031.86	796.626	1016.52	884.134	952.682	909.243	800.079
ENSG00000021852	0	0	0	0	0	0	0	0	0	0	0	0	0	0	0	0
ENSG00000022267	3288.71	3366.45	2111.6	2350.34	2056.8	1730.01	4336.12	5050.38	2127.64	3432.32	2100.42	2909.42	2406.74	2798.9	2358.29	4387.55
ENSG00000022277	2896.77	2917.39	1478.46	1705.43	1831.02	1892.08	3162.77	3853.34	2361.81	2896.34	2439.33	2630.7	3037.19	2324.84	2638.34	3090.8
ENSG00000022355	8.97108	19.3808	8.68783	40.844	28.2968	11.8531	14.6375	7.22599	36.2758	9.21655	10.6557	14.9253	14.0179	8.69306	7.85063	24.2539
ENSG00000022556	31.6918	309.696	280.403	277.155	319.953	307.722	312.691	341.962	27.9708	5.53391	32.5007	1.86895	14.8584	11.2181	25.8787	331.345
ENSG00000022567	252.228	314.116	120.889	103.118	116.438	122.119	292.318	319.018	308.332	236.719	280.618	219.878	245.567	187.518	337.027	251.778
ENSG00000022840	2773.84	2697.6	2622.24	2425.47	2395.72	2375.33	2717.87	3410.92	2167.74	2549.61	2701.72	1928.46	3002.06	2181.11	2907.9	2686.03
ENSG00000022976	125.652	68.4933	158.713	115.756	181.292	185.879	76.9939	62.1637	81.3751	89.2191	81.7822	96.3916	96.079	58.7436	83.23	87.1648
ENSG00000023041	1363.88	1028.43	1858.04	1373.71	1817.72	1628.28	836.832	834.783	1096.62	1488.09	1040.72	1262.49	1242.17	1271.66	1130.69	979.434
ENSG00000023171	179.448	264.427	281.094	203.322	183.843	170.241	568.79	761.667	326.387	152.328	456.945	156.508	348.606	137.331	340.313	249.549
ENSG00000023191	1592.05	2068.58	1108.41	1172.39	1119.66	1132.11	1427.77	1383.39	1804.26	1464.2	2095.16	1500.18	1763.5	1268.6	2003.37	1941.5
ENSG00000023228	2995.01	4039.84	1601.35	2056.7	1586.97	1603.69	3276.09	3736.41	2475.63	3007.4	2547.63	2538.2	2761.67	2584.7	2995.81	3855.34
ENSG00000023287	3449.67	3187.42	2005.51	2441.29	1732.64	1715.58	4829.22	4994.98	2326.49	2942.21	2285.97	3010.73	2775.89	2650.4	2758.82	2934.74
ENSG00000023318	1706.45	1764.94	2958.04	3157.21	3122.42	2855.17	2467.32	2879.66	1464.98	1775.23	1662.63	1522.48	1901.14	1512.17	1604.69	1712.1
ENSG00000023330	1098.64	1991.61	1338.05	1560.32	942.847	1029.06	1700.92	1957.91	1507.24	1142.25	1605.54	983.444	1478.03	1033.85	1498.97	1952.11
ENSG00000023445	207.841	3216.98	3061.41	2543.14	1470.73	1922.52	1680.52	1842.32	807.888	161.796	647.306	144.991	837.57	154.857	647.385	1955.34
ENSG00000023516	1856.42	1957.65	884.018	895.741	760.616	853.849	1387.27	1570.11	1654.06	1706.95	1564.21	1389.66	1455.57	1440.16	1713.1	1739.25
ENSG00000023572	66.2608	139.762	90.0436	116.571	73.5012	96.2263	74.4233	65.6017	74.5561	43.6026	86.3235	41.6849	76.8084	44.1325	71.51	112.43
ENSG00000023608	2722.6	3504.25	1757.84	2897.4	1646.23	2804.34	2100.89	2686.53	4911.74	3466.43	6362.59	2381.81	6880.91	2491.82	5732.33	2496.12
ENSG00000023697	1286.02	1001.17	399.549	598.345	456.961	390.757	890.77	1166.4	1105.02	1281.48	1023.22	1095.13	1322.94	1070.42	1083.89	1101.17
ENSG00000023734	4863.11	6696.6	3989.84	4552.84	4035.01	3860.58	4711.03	5458.27	4873.71	4957.66	4753.09	4194.79	4923.88	4356.78	5129.93	6140.84
ENSG00000023839	75.813	96.477	410.539	178.203	160.163	226.806	99.1898	70.2072	91.8847	52.8039	118.02	40.6936	66.7592	41.5199	87.1841	72.3968
ENSG00000023892	22.3953	91.9653	306.943	212.089	147.758	126.663	187.782	171.626	24.6586	16.0169	38.6351	20.7445	40.3276	13.4774	33.8313	103.335
ENSG00000023902	909.579	973.047	623.502	787.173	675.786	561.038	954.226	1097.38	731.671	736.992	867.308	788.934	794.7	748.807	830.083	1119.17
ENSG00000023909	748.263	1552.21	646.409	804.55	446.851	559.294	1092	1106.1	646.787	641.249	772.03	652.077	650.864	621.385	779.255	1411.32
ENSG00000024048	999.486	1459.47	1177.58	1087.15	1004.08	1090.12	1409.24	1457.36	873.982	916.694	856.704	798.024	811.599	721.971	879.634	1458.85
ENSG00000024422	1314.08	624.736	279.849	369.928	359.085	280.24	1375.34	1560.58	773.786	1221.92	933.209	1099.9	1086.49	1213.22	922.515	638.25
ENSG00000024526	2560.54	1804.5	1341.65	1271.63	1075.48	1199.48	1491.27	1765.19	2610.73	2579.14	2492.53	1898.42	3490.19	2383.26	3221.93	2147.95
ENSG00000024862	271.87	251.405	166.842	168.873	141.796	128.747	336.272	427.14	221.537	280.889	243.804	282.02	216.315	227.171	249.732	231.215
ENSG00000025039	626.163	403.637	245.511	298.141	133.159	166.875	738.772	750.326	421.505	520.979	440.339	433.925	497.046	482.843	449.897	478.558
ENSG00000025156	844.068	765.168	484.649	657.484	539.76	607.578	1041.08	1181.78	583.124	893.177	811.712	838.57	889.38	712.677	917.058	816.286
ENSG00000025293	930.282	1004.05	604.637	676.363	705.375	647.559	1014.84	1186.26	780.408	962.828	716.994	758.099	873.194	906.078	961.954	1031.69
ENSG00000025423	22.5763	17.9865	55.7015	31.1115	35.3513	30.1748	85.3306	95.1685	17.5937	21.2696	16.249	22.7476	34.62	12.6028	17.3293	27.0459
ENSG00000025434	164.939	111.129	180.377	202.14	216.479	140.579	144.697	164.993	143.186	189.434	171.989	151.665	135.841	151.693	156.32	147.408
ENSG00000025708	11.7652	33.0604	16.8541	18.2139	4.30035	7.32661	2.2909	12.4672	2.42137	1.54071	27.4653	13.484	22.4138	12.7951	6.66722	2.00284
ENSG00000025770	1841.75	1537.02	2064.4	1787.44	1936.63	1345.17	788.535	838.418	1272.45	1656.69	1394.57	1488.07	1087.97	1589.11	1368.09	1665.24
ENSG00000025772	2187.42	3520.1	1851.48	2193.7	1889.32	1937.04	2294.76	2477.08	2653.99	2119.64	2756.12	1876.67	2682.52	1887.38	2563.84	3398.13
ENSG00000025796	2056.63	1913.44	2147.9	2062.73	2199.65	2272.39	1944.89	1663.68	1393.32	2071.75	1474.04	1593.47	1688.77	2051.35	1620.11	2163.94
ENSG00000025800	3049.49	4177.06	1276.1	1239.37	1092.27	1060.96	1971.07	2228.96	2808.87	3000.74	2686.95	2337.17	2517.76	2637.11	2905.69	4322.75
ENSG00000026025	41570.2	43415.7	31227.6	32784.1	29335.4	26713.3	30367.8	32984.1	29055.2	37759.7	32590.1	35919.3	32758.9	34311.9	34357.5	44012.9
ENSG00000026036	268.247	250.223	688.943	399.878	550.687	495.171	149.221	103.341	138.224	204.605	159.935	163.163	109.808	166.431	200.357	209.367
ENSG00000026103	656.033	1546.24	898.664	1040.26	525.194	1081.14	599.085	677.653	3427.36	633.128	3551.68	542.645	3384.28	533.126	3236.59	834.098
ENSG00000026297	259.539	327.486	564.773	443.358	576.625	433.363	475.896	559.982	166.333	240.096	192.506	203.635	253.813	201.014	237.947	352.959
ENSG00000026508	3723.38	8392.3	4622.12	5391.94	4934.94	7020.22	10742.7	13183.3	8505.25	3645.21	8669.2	3124.18	10114.2	2936.41	7656.91	5001.4
ENSG00000026559	399.454	418.084	200.496	214.962	354.375	318.084	446.273	473.661	431.021	390.767	580.026	399.228	563.128	368.2	442.106	385.821
ENSG00000026652	548.859	508.881	925.588	745.401	614.499	560.579	990.535	920.762	352.146	534.83	400.028	527.525	372.831	534.246	430.483	582.541
ENSG00000026751	248.715	565.114	415.65	481.25	187.798	276.101	229.513	286.309	380.958	273.321	423.675	241.048	410.881	216.832	355.768	335.245
ENSG00000026950	353.005	222.57	366.08	269.731	229.665	178.178	379.847	450.037	158.682	300.248	152.411	273.667	194.527	274.438	185.621	231.185
ENSG00000027001	264.929	375.17	426.482	399.053	332.016	256.752	239.588	313.347	210.158	261.125	219.776	282.086	231.864	231.015	257.676	421.914
ENSG00000027075	1071.59	674.063	335.354	385.537	288.519	304.823	1496.79	1708.25	1301.96	1142.77	1608.1	994.512	1512.95	984.483	1319.23	600.558
ENSG00000027644	7.00586	2.00323	0.987635	5.99263	8.87892	3.97226	12.6282	12.4793	10.8146	5.96014	11.044	8.04927	8.64231	5.01345	8.95359	3.00627
ENSG00000027697	786.452	825.541	842.658	859.892	737.741	720.003	1084.72	1388.57	807.21	843.146	881.259	762.527	1026.55	746.666	903.595	792.679
ENSG00000027847	450.372	522.177	355.038	378.832	383.415	368.723	511.683	510.93	395.639	373.428	449.866	359.726	407.325	337.214	401.904	441.561
ENSG00000027869	1.60951	11.2636	2.75728	10.9051	1.58512	2.66735	5.38009	4.49913	20.4466	3.69286	14.332	0	9.4117	3.24417	12.8854	4.10791
ENSG00000028116	1584.18	1975.46	1373.74	1540.17	1339.24	1205.83	1186.75	1346.45	1195.77	1623.47	1222.43	1402.9	1282.67	1462.55	1340.66	1886.79
ENSG00000028137	5.10902	17.1724	24.2275	14.0373	13.0672	12.3598	49.4104	80.032	2.18085	4.38601	8.47633	7.0675	3.94103	5.19926	5.03293	17.9461
ENSG00000028203	1060.02	956.883	922.302	903.663	706.628	764.024	920.848	994.408	832.097	1229.65	1012.13	1180.11	1128.42	1200	1042.28	983.796
ENSG00000028277	170.488	118.165	77.4743	72.5536	86.3888	72.1919	283.037	274.411	473.641	93.055	289.82	84.6255	273.441	80.7344	450.808	93.8225
ENSG00000028310	1214.36	854.653	964.568	721.981	802.77	844.006	604.768	594.571	967.667	1098.99	966.522	857.108	1039.36	822.551	910.729	752.858
ENSG00000028528	4708.31	4543.16	2359.64	2715.38	2014.98	2054.81	3557.98	4093.11	3536.59	4559.89	4097.77	4115.95	4862.36	3795.13	4039.21	4436.58
ENSG00000028839	646.672	902.066	524.379	545.467	498.179	556.18	632.633	689.026	615.527	587.73	736.096	473.82	663.177	538.216	740.063	692.187
ENSG00000029153	1957.91	2183.12	739.139	827.821	632.979	609.036	1666.06	1933.78	1336.05	1933.16	1283.59	1775.05	1582.95	1816.3	1553.95	2110.85
ENSG00000029363	5866.17	5709.82	3197.12	3233.35	3253.24	3586.39	3476.42	3700.57	6436.87	6199.39	5484.79	4631.38	7151.83	5178.46	6451.39	5138.84
ENSG00000029364	4675.07	2817.2	1922.68	1819.81	1631.91	1483.48	2193.87	2744.72	4441.1	4273.97	4447.81	3902.59	4004.87	4048.89	4786.56	2793.86
ENSG00000029534	155.444	22.7706	55.9359	31.5313	50.0411	13.0616	53.1015	21.6888	40.6643	96.029	90.7292	72.8489	55.0198	51.6389	42.5841	37.5241
ENSG00000029559	0	0	0	0	0	0	0	0	0	0	1.00965	0	0	0	0	0.999596
ENSG00000029639	287.834	427.366	342.017	452.79	393.148	372.011	478.905	505.1	283.731	293.226	312.285	217.932	368.642	250.538	273.067	447.698
ENSG00000029725	1256.52	1636.76	663.104	799.138	679.165	675.102	1482.58	1826.21	1182.87	1266.23	997.909	1082.32	1573.31	1121.08	1110.18	1555.88
ENSG00000029993	2144.74	1451.63	1024.31	1091.9	1309.28	1051.18	1445.71	1458.8	1812.48	2205.83	1944.57	1839.77	2457.77	1873.38	2088.76	1777.56
ENSG00000030066	3584.14	2907.86	2327.99	2046.81	2372.27	1947.08	2510.26	2523.15	2300.4	3403.51	2238.32	3081.99	2329.74	3058.2	2726.2	3272.58
ENSG00000030110	804.207	1418.92	508.783	675.941	457.716	507.083	1128.69	1361.88	1145.96	664.345	1317.83	642.293	1108	560.599	1112.71	1295.94
ENSG00000030304	0	0	0	0	0	0	0	0	0	0	0	0	0	0	0	1.00525
ENSG00000030419	460.151	376.657	158.486	165.832	113.529	92.9028	550.451	512.155	178.504	505.305	277.873	396.582	198.538	347.444	229.369	404.541
ENSG00000030582	7436.68	4391.46	7011.7	6981.85	5516.57	4409.46	6379.11	6192.45	6769.82	6609.87	7591.89	6929.66	7139.85	5516.05	7608.96	4473.82
ENSG00000031003	1411.35	1075.57	836.485	856.856	720.45	698.818	639.99	671.497	789.079	1464.64	753.291	1138.75	833.832	1084.46	843.844	1091.5
ENSG00000031081	1090.2	908.254	366.008	380.981	248.403	210.281	732.506	770.211	909.721	1288.74	890.906	959.369	900.571	931.788	990.331	977.061
ENSG00000031691	467.547	506.422	374.227	366.836	347.284	323.064	334.044	421.66	357.449	571.112	288.165	491.355	386.057	438.121	356.176	537.44
ENSG00000031698	4214.8	6614.23	3087	3841.36	3411.7	3674.16	6165.25	6992.84	5001.06	4185.09	5334.57	3846.54	5781.48	3434.68	5135.49	5980.46
ENSG00000031823	1081.31	1115.14	555.408	736.705	521.519	481.623	806.455	1044.89	980.829	1210.69	955.842	1014.52	867.683	1065.57	824.231	1234.59
ENSG00000032219	957.422	968.681	786.765	555.471	937.584	710.761	1495.18	1680.27	671.59	939.788	698.908	835.1	894.978	786.628	829.682	892.733
ENSG00000032389	367.758	383.406	171.722	191.657	151.854	165.725	240.357	308.843	280.113	333.88	293.231	400.384	303.615	303.16	352.538	448.778
ENSG00000032444	1290.39	1234.31	2173.01	1932.38	2004.83	1853.93	1583.22	1451.55	805.64	1000.82	817.867	813.158	720.152	1013.21	1050.03	1389.19
ENSG00000032742	391.495	278.71	362.159	363.463	342.353	319.702	247.742	346.798	250.162	397.941	245.858	299.077	262.103	292.203	259.421	287.545
ENSG00000033011	599.21	619.366	555.062	589.968	388.075	445.009	227.005	273.443	565.534	614.523	614.425	478.744	468.399	463.137	500.662	659.077
ENSG00000033030	695.112	788.971	1819.47	1366.18	1741.24	1609.46	568.323	603.78	635.491	696.335	649.528	580.7	722.141	608.167	729.982	822.028
ENSG00000033050	515.942	1004.96	617.05	543.396	493.052	542.531	391.94	310.67	543.783	513.515	739.348	445.35	510.109	433.32	720.959	863.86
ENSG00000033100	270.408	418.603	414.656	443.643	292.069	343.737	354.162	367.4	316.17	247.972	377.56	233.367	271.856	179.784	287.996	397.499
ENSG00000033122	34.3013	9.01797	8.19536	8.11071	11.7444	12.7984	8.39865	8.43471	13.7138	27.737	9.33869	19.154	16.1432	28.8458	17.5906	11.7393
ENSG00000033170	2600.72	1786.6	1218.16	1212.79	965.682	970.225	1368.5	1478.16	1730.42	2801.96	1772.82	2531.88	1865.1	2476.5	1939.15	1895.94
ENSG00000033178	4049.74	4414.77	2172.02	1979.49	1574.19	1639.86	4047.92	4673.24	4002.51	3789.99	3281.16	3349.47	4191.89	3768.5	3462.93	4403.66
ENSG00000033327	877.775	698.701	547.635	510.403	352.3	299.661	912.309	949.507	514.516	695.001	562.449	641.819	550.345	666.586	567	702.559
ENSG00000033627	26.2579	37.4819	33.0588	16.7194	18.7501	17.7667	12.7674	32.8197	29.0186	33.2564	22.4593	26.3339	28.2448	28.5554	40.9651	28.5855
ENSG00000033800	1628.99	1480.79	1244.99	1047.49	1106.9	887.156	1656.41	1858.8	1353.4	1692.45	1289.29	1414.03	1586.65	1358.25	1504.42	1927.8
ENSG00000033867	1251.14	1377.31	833.348	530.314	648.538	703.134	1670.56	1639.96	1429.97	1378.76	1125.6	1057.39	1673.54	1049.63	1573.15	1489.18
ENSG00000034053	362.704	773.456	421.128	447.536	339.012	371.758	728.204	776.77	334.799	400.94	332.629	433.917	306.505	358.257	318.82	759.265
ENSG00000034152	1096.02	2250.91	1370.1	1564.51	1113.58	1451.31	1560.44	1503.83	1912.99	921.691	2122.22	781.169	1403.37	867.009	1810.99	1789.17
ENSG00000034239	1.61022	1.12156	4.42577	1.67706	0.551892	3.95681	19.4315	25.6938	6.53903	6.53493	6.6351	8.96799	12.3152	2.76085	4.3831	0
ENSG00000034510	23604.6	26718.9	14298.2	21627.3	13834.1	12279.9	20926.8	25418.8	21863.3	22905.5	25738.4	19779	26597.6	19149.5	24209.2	26998.2
ENSG00000034533	171.968	150.443	140.799	97.6794	109.213	101.161	111.288	113.864	163.464	183.284	167.559	131.965	168.362	192.871	154.516	140.828
ENSG00000034677	2038.82	2104.61	1386.25	1321.67	938.86	1035.35	2928.72	3258.78	1629.2	1847.15	1801.06	1690.34	2702.51	1567.9	2150.62	1793.47
ENSG00000034693	447.704	587.54	685.632	676.376	720.971	616.859	438.939	566.027	222.085	459.697	296.854	432.046	355.789	370.87	314.334	594.968
ENSG00000034713	1480.9	2047.28	900.195	1271.99	891.486	1019.56	2369.85	2766.76	1731.85	1356.39	1905.98	1357.76	2238.05	1225.48	1914.68	1565.58
ENSG00000034971	0	0	0	0	0	0	0	0.958139	0.985073	0	0	0	0	0	0	0
ENSG00000035115	117.005	76.7198	204.432	142.845	208.69	160.151	130.649	124.234	97.8879	125.416	120.241	137.755	112.564	93.3125	104.168	130.631
ENSG00000035141	2347.5	3186.5	1749.13	1884.31	1628.59	1693.68	1767.57	1948.78	2011.34	2442.19	2159.43	2006.51	2321.8	1993.93	2103.37	3076.39
ENSG00000035403	8469.74	7566.18	5127.66	4970.47	3761.41	3684.35	6202.03	6884.84	7417.08	8388.98	7137.83	6767.56	7340.56	6770.13	7337.13	8979.66
ENSG00000035499	2009.44	890.607	595.979	657.478	706.01	589.146	569.849	761.17	1510.47	2132.99	1493.85	1884.41	1536.09	1843.36	1659.61	1029.74
ENSG00000035664	82.7544	69.2867	114.252	95.3961	120.268	62.7761	214.753	198.613	48.7718	117.823	66.7616	93.8169	73.9718	105.523	100.613	140.651
ENSG00000035681	1355.76	1423.9	1371.32	1105.5	1177.15	1012.89	1139.06	1132.75	1390.56	1490.09	1117.25	1164.11	1396.46	1080.59	1256.58	1667.76
ENSG00000035687	1109.97	1384.37	795.283	787.183	694.2	800.892	860.645	963.781	1094.72	1122.58	1138.66	948.115	1251.3	937.329	1208.81	1336.83
ENSG00000035720	0	0	0	0	0	0	0	0	0	0	0	0	0	0	0	0
ENSG00000035862	15060.7	5935.19	6240.49	6213.05	5962.95	5194.42	12103.4	12944.1	9649.55	13167.5	9326.79	12357.2	10610.3	11946.5	11060.4	7449.47
ENSG00000035928	4276.13	3619.37	2522.85	2257.03	2159.28	2222.58	4127.05	4608.77	2692.74	4751.84	2702.74	3982.64	3779.14	3635.94	2870.58	3586.11
ENSG00000036054	2363.45	1310.03	1070.29	980.599	902.102	892.393	1518.27	1662.52	1464.12	2675.14	1466.39	2181.91	1686.73	2374.24	1745.82	1387.75
ENSG00000036257	2452.79	2579.45	2160.42	2326.89	2129.07	2111.32	2395.7	2441.33	1945.3	2410.91	2173.73	1994.16	2347.37	2148.24	2376.14	2636.12
ENSG00000036448	67.3858	60.3774	83.3278	88.5681	48.5416	40.8117	53.7816	70.0399	78.2837	84.516	102.633	42.9762	94.2623	73.8658	91.9982	67.7167
ENSG00000036473	0	0	0	0	0.987834	0	0	0	0.986771	0	0	2.02347	0	0	0	1.98546
ENSG00000036530	24.5575	11.8069	24.3243	12.4412	22.2479	21.1727	26.0896	33.8635	18.3182	19.6096	18.8999	22.2485	14.4742	16.2739	21.4392	12.1865
ENSG00000036549	1501.81	1814.81	1179.31	1017.49	1156.6	1151.08	1259.86	1204.57	1484.9	1627.07	1619.15	1418.29	1556.48	1378.03	1713.2	1561.23
ENSG00000036565	0	0	0	0	0	0	0	0	0	0	0	0	0	0	0	0
ENSG00000036672	12.8572	15.7706	32.2542	35.1312	34.5577	28.1532	38.4664	59.2565	5.44728	5.50388	4.63297	5.76759	8.85388	4.31026	10.2934	40.6943
ENSG00000036828	33.1804	17.9936	55.8679	32.2068	32.0815	23.8832	20.4622	17.8614	30.0788	30.4874	18.8187	20.4056	17.8795	21.7055	22.6745	7.08498
ENSG00000037042	264.007	63.9666	51.2658	64.7145	71.6797	28.1836	35.6514	45.8327	194.754	233.25	219.049	199.74	204.689	194.626	212.944	77.0837
ENSG00000037241	438.187	1054.14	725.533	954.591	600.528	634.734	528.769	613.119	549.28	417.914	651.169	350.484	652.416	351.672	518.117	992.263
ENSG00000037280	683.803	130.697	228.182	173.135	182.855	135.472	370.066	444.383	295.018	540.128	343.291	559.043	407.948	438.991	433.052	181.673
ENSG00000037474	3039.03	4644.92	4563.16	3947.44	4166.32	4221.14	2665.8	2887.77	3427.99	3237.07	3474.6	2385.5	3523.65	2594.15	3256.81	4129.06
ENSG00000037637	345.901	606.532	469.262	479.771	520.737	363.988	347.726	441.498	285.463	362.893	340.604	325.757	235.556	303.557	304.765	687.95
ENSG00000037749	1481.35	1536.31	409.108	417.926	312.461	418.893	1103.38	1318.47	1626.01	1492.22	1335.85	1289.26	1577.93	1265.23	1664.09	1312.52
ENSG00000037757	589.541	392.351	510.182	435.772	615.465	362.699	389.3	381.708	231.109	479.196	279.575	401.919	246.71	437.724	332.253	510.243
ENSG00000037897	271.827	342.358	305.176	277.053	236.585	238.58	248.678	305.019	369.706	268.08	374.211	189.047	349.932	219.894	302.615	337.665
ENSG00000037965	202.207	306.702	167.879	178.859	177.584	189.781	118.487	148.649	224.358	201.835	262.053	181.391	255.083	159.622	258.668	292.478
ENSG00000038002	401.011	485.811	278.54	432.99	335.215	345.162	559.133	641.976	384.151	417.548	345.427	401.533	605.651	358.139	407.878	433.379
ENSG00000038210	377.247	352.883	186.354	227.511	141.832	139.228	351.075	317.68	256.269	393.011	420.015	332.553	348.59	342.001	379.037	405.677
ENSG00000038219	1717.99	1730.51	2293.86	1755.84	1599.81	1838.43	1855.07	1790.43	1829.74	1886.45	1706.35	1251.51	1872.36	1325.72	1708.81	1730.26
ENSG00000038274	1488.28	2012.47	858.669	1093.12	897.291	1058.37	1266.1	1518.41	1397.1	1370.11	1479.12	1299.9	1390.54	1256.51	1552.84	1784.37
ENSG00000038295	31.8918	11.559	2.51284	11.6128	14.1119	5.77602	37.2574	89.6068	14.9931	16.5639	10.1625	21.9994	28.9632	51.0282	43.1643	24.2819
ENSG00000038358	1974.22	1392.85	2248.95	2071.89	2687.71	2091.64	1709.29	1455.91	1666.7	1578.21	1656.83	1212.39	1471.75	1510.37	1640.9	1975.63
ENSG00000038382	8290.06	8711.32	14731.1	9569.96	10398	9729.31	5367.43	6042.01	6126.05	8279.68	5272.32	6035.57	4555.84	6538.97	5905.41	9698.68
ENSG00000038427	28.4631	11.6504	13.7667	22.5717	27.7342	33.7997	18.2114	29.737	20.407	66.0526	17.012	41.5148	18.4904	29.605	7.71677	16.8983
ENSG00000038532	1977.75	1625.42	1414.98	1110.61	1070.55	997.137	1676.38	1741.99	1950.61	1890.3	1968.56	1576.89	1899.02	1491.22	2008.83	1608.36
ENSG00000038945	3.15807	3.70019	3.85386	3.12735	2.56782	0	2.6009	1.64041	3.37939	1.3919	6.44399	3.16204	0.221857	1.85037	0	6.15692
ENSG00000039068	20.4822	39.8325	22.6206	27.5736	32.6844	20.1387	30.7767	32.2767	73.489	40.2807	27.4397	27.9742	21.8063	41.5722	31.1572	47.7569
ENSG00000039123	3270.83	3324.44	1855.13	1825.21	1600.2	1475.06	2623.71	3139.13	2484.55	3278.79	2119.88	2905.9	2990.21	2792.17	2391.67	3476.69
ENSG00000039139	56.3206	159.556	108.77	132.054	105.323	108.984	133.486	131.685	68.8737	113.106	58.8495	67.0955	83.7299	34.9814	61.3287	92.7068
ENSG00000039319	2008.92	1653.92	1516.86	1545.52	1576.42	1253.21	1466.61	1117.84	1576.67	1640.51	1403.99	1270.69	1257.28	1432.65	1459.87	1490.69
ENSG00000039523	1513.79	2059.33	1664.89	1756.58	1813.66	1380.84	2152.16	2085.65	1481.32	1332.84	1585.82	1083.86	1450.65	1217.97	1589.35	2590.34
ENSG00000039537	0	0	1.0838	0	0	0	1.35426	1.28408	0	0	0	0	0	0	0	0
ENSG00000039560	4894.03	4925.96	2208.27	2247.89	2095.58	2089.43	5080.4	5864.82	3733.59	4748.77	3450.4	4005.98	4067.73	4452.45	3627.82	4940.83
ENSG00000039600	0	2.36385	1.16364	1.17805	0.686493	0	2.28876	4.51699	8.31491	0	1.71624	0	4.63573	1.18443	8.20756	0
ENSG00000039650	998.315	551.076	818.106	646.845	767.4	623.249	640.909	667.696	603.765	966.344	618.331	789.46	687.811	801.288	738.121	607.21
ENSG00000039987	0	0.877576	0.864286	0.874788	3.95369	0	0	1.52287	2.58508	0.870678	0.878806	0	2.51624	0	0.870811	3.04908
ENSG00000040199	1206.75	1695.98	1077.47	1035.07	1005.22	978.325	1306.08	1350.22	1433.83	1181.15	1061.15	990.04	1064.25	927.489	1162.98	1839.77
ENSG00000040275	1749.54	1520.13	1338.56	1160.54	1146.77	1130.76	806.979	804.39	1340.9	1790.14	1249.4	1157.31	1638.88	1447.23	1479.12	1561.28
ENSG00000040341	2264.87	2089.74	825.439	1016.43	784.26	710.56	2386.05	2912.22	1570.83	2263.28	1524.78	2077.93	1977.03	2032.9	1916.68	2136.68
ENSG00000040487	263.286	443.716	410.323	429.107	316.326	355.094	275.722	259.425	219.961	193.413	229.612	208.182	187.77	186.608	226.53	377.6
ENSG00000040531	271.684	355.822	241.347	193.943	204.801	201.953	266.953	231.85	236.894	229.154	245.161	234.588	220.412	162.883	185.654	280.123
ENSG00000040608	407.24	145.897	118.786	112.393	126.655	102.192	174.662	191.294	186.895	276.891	401.972	444.806	307.475	364.109	348.435	140.522
ENSG00000040633	1128.52	1243.61	723.164	898.931	698.988	698.826	835.052	981.678	1192.79	1099.8	1226.66	946.625	1437.56	865.938	1251.32	1283.02
ENSG00000040731	40.483	42.2481	107.69	72.8498	70.3773	115.671	65.2446	74.2568	63.3228	56.1799	73.5366	40.7855	65.7488	53.397	68.7227	37.3211
ENSG00000040933	1707.52	1758.04	850.222	878.899	838.472	715.309	1878.14	2022.93	1292.13	1533.42	1315.53	1401.66	1207.3	1278.25	1316.8	1817.94
ENSG00000041353	55.9726	30.8463	25.6186	24.2843	11.9945	12.0725	61.4172	75.4899	37.4467	93.4025	83.6008	115.346	86.5673	102.782	132.66	42.2712
ENSG00000041357	4685.1	5904.37	3703.35	4275.61	3460.35	3531.84	4420.3	5418.13	4415.09	5028.79	4512.11	4120.81	5557.47	4313.45	4810.11	5656.38
ENSG00000041515	83.2761	85.7639	107.928	69.5011	70.2201	54.9872	162.031	190.501	131.678	117.961	108.785	86.7303	114.161	99.1038	117.411	112.246
ENSG00000041802	1908.19	2127.95	2127.47	1794.34	1997.45	1798.95	1268.63	1360.01	1986.54	1975.2	2071.5	1518.77	2102.61	1562.1	2237.7	1915.97
ENSG00000041880	490.222	522.509	727.84	565.942	564.117	551.674	415.267	342.688	486.013	508.046	536.129	403.045	505.217	428.855	619.302	435.424
ENSG00000041982	10939.8	3412.86	1665.11	1736.64	2077.39	2014.28	6342.3	6231.65	7442.85	9515.68	6311.61	8379.74	7214.41	7565.57	7147.32	3827.42
ENSG00000041988	147.214	203.501	161.085	184.29	203.172	160.15	262.477	261.071	145.449	140.108	145.824	129.937	166.329	166.907	145.825	202.469
ENSG00000042062	5.81158	9.14106	6.48892	12.4357	15.4043	3.9013	13.5683	4.35609	5.02782	6.87379	2.53562	3.1701	5.8369	11.9793	7.75783	5.82868
ENSG00000042088	681.947	359.106	178.887	210.501	242.857	263.967	364.258	488.229	571.1	555.876	558.417	484.103	558.164	569.418	537.004	317.584
ENSG00000042286	1091.52	1917.19	1258.65	1590.93	977.599	967.958	852.028	891.57	953.224	985.653	1122.04	910.019	891.033	882.12	1071.57	1727.71
ENSG00000042304	2.00225	0	4.30459	0.999375	2.96699	2.14812	1.76734	0.958352	4.78411	2.05107	3.00922	2.20907	0	0.991563	2.14854	2.43131
ENSG00000042317	343.872	150.91	111.612	104.889	104.508	104.334	292.251	316.841	255.045	306.959	256.095	291.461	372.765	297.279	337.009	144.504
ENSG00000042429	754.733	1212.38	1218.56	1000.41	1013.95	1132.74	427.104	579.877	746.632	726.475	871.9	710.31	799.88	692.51	806.65	1073.78
ENSG00000042445	816.976	1157.93	827.288	1047.49	786.082	904.016	1102.74	1243.33	1714.48	730.236	1695.37	686.194	1603.96	662.534	1635.76	901.638
ENSG00000042493	822.413	731.643	531.865	637.143	436.82	256.414	880.4	1118.7	665.093	763.426	801.128	667.659	715.217	630.338	733.227	732.015
ENSG00000042753	2903.01	2944.62	1535.01	2040.11	1669.14	1715.98	2521.07	3036.66	2756.33	2819.27	3260.14	2511.87	2871.65	2453.44	2957.33	3128.2
ENSG00000042781	2.87051	5.7439	0.944341	2.86415	0.943196	0	1.85771	6.42859	1.87898	0	5.60062	0	1.83763	0.95807	0.951206	0
ENSG00000042813	0	0	0	0	0	0	0	0	0.982441	0	0	0	0	0	0	0
ENSG00000042832	13.701	6.67732	23.5751	21.8391	24.8151	47.7497	3.19012	30.1299	69.3484	5.37087	26.7857	15.1547	6.30907	9.37642	14.9214	15.2984
ENSG00000042980	19.7357	22.4585	64.9977	49.3787	26.6865	25.4308	106.809	165.874	2.85456	9.47694	9.4753	14.4034	9.40888	11.9945	11.8789	39.1135
ENSG00000043039	16.6565	9.32997	10.5912	13.5209	15.0334	5.64816	14.6587	16.7687	4.65702	13.0208	3.77403	12.5485	3.02799	9.99785	8.38969	11.4573
ENSG00000043093	1754.05	1581.93	553.697	745.317	570.556	606.658	1397.24	1865.1	1645.77	2006.28	1671.57	1570.53	2020.47	1607.46	1772.7	1400.8
ENSG00000043143	1800.99	919.001	368.877	300.711	234.921	283.121	575.075	759.691	1105.76	1554.3	1102.67	1276.25	1188.15	1370.82	1247.21	867.803
ENSG00000043355	4.00434	3.00652	6.91386	7.99339	6.90681	3.97418	6.79972	5.75682	1.96767	6.95842	1.00413	1.00729	2.87858	0	0.994962	1.99938
ENSG00000043462	0	0.985004	0	0	0.968932	0.685788	1.90719	0	0	0.68628	0	0	0	0	0	2.69657
ENSG00000043514	695.672	702.462	1135.8	884.576	1149.27	906.788	521.345	550.714	446.456	770.863	551.206	673.245	528.123	542.652	524.119	696.116
ENSG00000043591	0	0	0	0	0	0	0.970996	0.959043	0.983507	0	1.00378	0	0	1.00329	0.994592	0
ENSG00000044012	0	0	0	0	0	0	0	0	0	0	0	0	0.961328	0	0	0
ENSG00000044090	1415.32	1697.9	1761.95	1434.21	1336.14	1043.53	1929.91	2227.08	1163.17	1161.64	1122.75	975.447	1019.57	1039.15	1064.65	1521.54
ENSG00000044115	11574.8	7823.32	4051.51	4437.09	3478.32	3704.84	8220.23	9001.97	11149.6	12613.5	10017.4	10525.5	12799.8	10445.9	11364.3	7863.59
ENSG00000044446	598.03	521.336	944.93	687.285	924.792	701.735	454.199	504.829	387.73	506.052	512.543	554.967	568.002	532.373	577.018	598.476
ENSG00000044459	486.992	270.31	195.255	190.507	248.743	161.605	246.513	307.603	195.122	465.546	220.938	408.555	267.918	451.777	282.61	306.548
ENSG00000044524	9.40631	1.8232	0	1.81261	0	0	0.76082	0.751872	7.48614	10.1133	3.93173	7.87936	4.274	10.9933	5.90866	0
ENSG00000044574	20255	19986.9	23219.2	25044.9	23993.9	23753.7	22397.3	25431.6	22399.6	21372.3	23566.1	18091.3	26979	18379.3	24759.9	19646.8
ENSG00000046604	4689.75	1500.83	777.831	855.482	662.608	756.717	1488.19	1767.26	3947.46	4394.81	3778.24	4161.93	4337.12	4035.95	4228.19	1527.47
ENSG00000046647	114.249	101.34	105.703	84.5298	110.899	80.1219	121.103	136.424	76.8695	107.048	82.4773	87.8482	108.414	94.5267	88.7522	80.1168
ENSG00000046651	388.312	329.116	630.059	568.982	568.421	548.78	442.37	474.247	375.298	439.619	365.548	364.714	481.98	382.688	358.404	393.106
ENSG00000046653	85.1429	32.32	19.7616	21.2635	11.1275	12.532	40.714	30.2731	38.1013	77.3209	15.0436	68.768	27.6079	41.8422	24.3209	44.6316
ENSG00000046774	0	2.0057	9.87727	17.994	0.986844	3.97646	5.82834	9.58905	1.96931	0	0	0	0	1.00469	1.99033	3.98755
ENSG00000046889	59.2559	12.961	21.5296	13.0772	23.3656	11.5566	87.0042	82.5904	12.3363	24.6532	55.243	35.6462	23.832	48.5211	40.4973	81.644
ENSG00000047056	148.387	185.751	125.72	116.531	128.066	120.535	156.073	139.173	177.497	163.735	156.23	129.333	229.029	113.14	148.52	188.081
ENSG00000047188	1411.86	937.148	1064.33	894.35	994.458	869.666	858.616	806.115	1024.32	1126.25	878.996	946.956	1133.7	1060.31	1169.49	992.113
ENSG00000047230	176.074	181.161	427.353	275.172	362.257	165.203	198.189	270.153	91.1582	231.456	81.0835	161.724	95.476	184.238	104.796	220.516
ENSG00000047249	794.678	1137.92	896.611	813.934	526.39	671.911	793.306	732.264	765.151	857.819	803.164	676.766	623.143	711.052	762.347	1065.13
ENSG00000047315	5350.85	5363.56	5902.77	4613.08	5239.71	5305.68	5345.11	5334.89	4777.68	5544.66	4851.27	4613.3	6530.51	5158.79	5026.87	5193.28
ENSG00000047346	385.229	195.801	311.794	273.648	219.537	288.526	282.875	295.494	311.023	284.894	314.537	318.768	326.979	259.807	320.922	201.551
ENSG00000047365	1284.43	1643.02	841.082	702.262	477.195	661.929	1624.14	1540.2	2284.99	1153.07	1762.93	1183.47	2198.98	870.766	2156.82	911.082
ENSG00000047410	7378.21	5889.04	8835.38	6835.45	9322.9	7935.45	4731.05	5390.37	5046.02	6963.78	4115.64	5714.95	5849.35	5996.47	5745.67	5833.31
ENSG00000047457	0.365866	2.48384	0.50351	0	1.9027	0.506652	4.78192	2.3475	3.63461	0	2.47613	1.96003	0.488877	0	0	2.31013
ENSG00000047578	1006.71	662.193	796.61	661.069	706.864	541.984	870.7	780.233	691.032	903.136	819.865	751.397	715.688	884.281	728.58	788.818
ENSG00000047579	326.64	300.317	211.637	233.491	222.176	179.846	292.058	260.009	144.727	316.319	175.78	280.97	219.545	245.549	199.656	308.161
ENSG00000047597	53.0445	43.0698	36.5438	45.9435	23.6771	28.7989	21.3708	33.5981	44.2418	52.6478	29.116	36.2218	35.5294	46.1236	36.8092	54.1114
ENSG00000047617	402.051	570.608	430.201	440.481	355.517	374.679	184.039	209.731	330.127	415.486	372.704	331.799	338.719	348.511	420.811	675.451
ENSG00000047621	800.904	800.444	455.283	485.383	496.321	372.453	433.543	473.103	652.527	877.274	672.066	721.366	793.741	708.064	638.337	795.973
ENSG00000047634	404.75	509.025	513.601	406.3	368.667	389.512	441.975	502.862	630.883	417.681	579.308	335.397	675.385	372.78	591.969	446.789
ENSG00000047644	181.792	160.756	60.5376	67.2357	113.891	90.5943	106.37	99.9411	144.142	139.621	209.991	177.368	145.296	149.641	191.386	115.569
ENSG00000047648	31.7148	38.4095	39.7156	32.8701	59.4346	35.5557	68.7359	64.7043	24.985	23.7964	30.0434	25.3346	27.4046	20.3941	40.378	35.9548
ENSG00000047662	6.00479	4.00598	14.1976	8.0089	10.8519	12.8667	4.85719	4.80069	4.8763	10.9251	4.22217	5.03823	3.842	12.0295	6.96381	4.01112
ENSG00000047849	14273.5	11434.9	7065.68	6986.06	6182.09	5354.4	9313.38	9959.21	8387.77	13726.1	8156.5	11708.9	8301.02	11991.8	9751.9	13892.2
ENSG00000047932	1706.81	1747.54	1367.78	1041.55	1379.43	1182.53	1042.13	990.426	1264.09	2001.95	1335.91	1399.46	1435.06	1507.14	1403.64	1995.22
ENSG00000047936	69.1474	536.345	495.86	509.134	482.21	606.355	410.754	410.831	123.098	117.052	83.5483	84.3608	84.5677	80.8973	112.586	437.348
ENSG00000048028	2628.81	2084.75	1196.12	1312.16	1299.32	991.304	2459.39	3038.73	1603.56	2681.66	1504.17	2522.45	2138.77	2420.38	1826.61	2066.92
ENSG00000048052	1384.54	1337.39	621.143	609.567	346.073	535.747	1258.97	1496.94	1543.52	1219.86	1421.16	1266.75	1641.1	1146.42	1468.61	1146.35
ENSG00000048140	2935.6	3063.99	1493.62	1698.05	1410.63	1141.53	2671.32	3013.61	2544.99	2751.22	2923.91	2438.29	2680.13	2468.32	2950.56	3282.15
ENSG00000048162	465.574	1559.58	982.913	1084.65	962.997	1044.77	448.646	514.793	750.92	436.533	905.531	368.039	835.993	403.143	759.207	1456.58
ENSG00000048342	465.363	486.934	589.852	475.073	452.694	422.071	333.951	314.557	308.44	482.333	243.867	303.491	261.219	299.921	293.494	548.883
ENSG00000048392	4386.37	11957.3	2548.92	3654.38	2011.26	3098.69	12570.7	15371.5	12855.6	3982.57	13040	3409.88	12506	4054.82	12540.5	7608.09
ENSG00000048405	361.077	554.221	328.562	321.049	265.981	301.878	483.766	504.229	462.581	386.589	440.526	309.397	486.924	280.126	470.044	412.897
ENSG00000048462	1.56206	0	0	0.757263	0.746551	1.08048	0	0	0	0	0	0	0	0	1.0784	0
ENSG00000048471	552.612	371.149	219.273	199.252	238.425	149.037	354.825	366.785	363.446	474.591	393.112	419.022	366.894	417.283	392.592	382.134
ENSG00000048540	41.2351	0	2.11117	1.56338	1.54389	0	4.32649	7.67166	2.30889	22.8786	3.60985	29.5792	4.14069	26.4997	5.82283	6.72915
ENSG00000048544	1294.72	2487.09	1231.89	1530	1170.05	1264.7	1810	2148.63	1261.91	1426.07	1366.47	1209.89	1429.61	1155.73	1336.96	2351.56
ENSG00000048545	0	0	0	0	0	0	0	0	0	0	0	0	0	0	0	0
ENSG00000048649	2538.45	2677.23	1467.09	1542.28	1330.44	1270.19	2547.31	2831.47	2368.8	2614.05	2077.3	2402.93	2828.94	2378.29	2140.82	2366.02
ENSG00000048707	2212.15	1373.74	1611.61	1238.53	1616.22	1195.33	2780.22	2637.33	1162.31	1943.43	1437.82	1223.89	1369.14	1325.34	1404	1750.47
ENSG00000048740	162.768	92.9274	63.7393	68.5197	58.7251	50.8658	93.3851	133.676	100.166	152.531	82.5134	157.034	73.3063	90.7115	71.6317	132.562
ENSG00000048828	5883.19	5873.31	2720.82	2359.08	2290.85	2292.89	3846.36	4050.82	4204.94	5427.03	4005.14	4312.93	4185.01	4730.28	4616.83	6533.05
ENSG00000048991	1775.13	1511.19	1068.99	889.861	988.283	858.229	1264.56	1420.36	1491.16	1797.65	1190.3	1400.93	1652.85	1570.02	1243.63	1883.74
ENSG00000049089	1046.9	643.037	999.107	990.261	1003.63	637.3	2166.5	2187.47	506.674	792.407	623.73	835.386	749.779	786.13	763.776	759.382
ENSG00000049130	489.783	976.464	312.996	347.49	267.177	408.878	1375.21	1575.29	1012.2	450.66	1103.08	463.534	1228.76	446.728	1281.52	912.479
ENSG00000049167	435.818	412.975	181.254	257.887	226.046	257.733	423.313	484.178	516.87	425.541	441.01	453.354	458.56	443.353	483.165	391.957
ENSG00000049192	1604.51	1534.01	580.767	624.713	383.224	545.025	534.03	565.482	2534.75	1412.83	2225	1165.44	2217.5	1101.92	2136.38	824.394
ENSG00000049239	1495.95	934.655	605.255	597.03	396.696	428.8	1287.69	1104.77	1320.39	1132.13	1267.16	1262.09	1017.61	1096.93	1189.45	903.402
ENSG00000049245	1612.53	1901.17	827.334	859.989	918.413	854.683	1421.75	1553.87	1555.19	1705.65	1734.31	1487.8	1798.81	1467.17	1708.37	1797.04
ENSG00000049246	3661.81	1842.22	1277.71	1010.74	1592.83	1229	2182.68	2424.78	1196.82	2772.21	1144.88	2811.83	1580.35	2835.34	1600.15	2080.5
ENSG00000049247	0	0	1.97558	0	0	0	0	0	0	0	0	0	0	0	0	0
ENSG00000049249	248.283	1367.84	727.474	720.768	473.355	511.864	1425.13	1677.88	355.503	280.676	276.529	229.583	315.966	216.262	283.243	1362.59
ENSG00000049283	30.093	25.3522	21.8494	47.9182	7.08863	10.8836	53.2913	48.4877	66.2671	24.3367	100.75	12.0268	121.32	38.4382	69.1079	32.7109
ENSG00000049323	3502.41	1925.45	1271.39	1242.9	1054.97	818.253	3208.53	3391.66	1566.11	3086.68	1495.55	3083.52	1997.46	2678.59	2082.04	2289.18
ENSG00000049449	12295	10213.2	10063.3	9712.89	8144.37	8683.27	11980.4	13612.6	11535.4	13012.4	11769.5	10697.6	15802.8	11299.9	12787	9927.72
ENSG00000049540	1.68307	0	6.74606	0	2.76407	2.79622	0.445518	0.879987	11.1432	3.92214	0.46054	6.15157	5.68958	6.04019	0.557564	5.42091
ENSG00000049541	1926	1531.56	986.452	981.488	1003.72	757.062	867.916	882.462	826.968	1894.43	947.445	1681.06	1018.51	1698.54	1075.35	1913.7
ENSG00000049618	2942.8	1787.62	1916.7	1461.02	1763.56	1519	1340.18	1471.05	1817.7	2760.75	1332.43	2190.43	1795.95	2344.86	1776.27	2512.72
ENSG00000049656	14951.3	11543.5	5500.76	5580.7	5808.59	5618.36	4224.66	4428	8639.66	14752	9063.13	12683.3	9169.69	12142	10008	13308.5
ENSG00000049759	2141.46	3079.9	1596.2	1649.32	1546.94	1910.86	2842.95	2954.95	2397.81	1703.65	2345.76	1873.72	2588.31	1406.76	2328.34	2109.71
ENSG00000049768	24.8391	14.3966	8.5144	10.0709	5.95432	7.70998	5.02425	1.80764	16.1192	18.1974	31.3473	15.0996	16.3518	6.76391	25.2772	11.0249
ENSG00000049769	78.2975	102.476	30.6006	22.7966	18.424	23.0416	30.6393	30.0449	151.304	53.0967	181.708	48.1407	193.344	50.131	203.34	73.8143
ENSG00000049860	1415.27	930.685	1744.76	1730.82	1761.93	1387.78	1513.52	1646.42	1163.18	1242.34	1199.04	1349.1	1545.65	1156.23	1268.46	752.738
ENSG00000049883	453.907	491.724	272.72	314.996	252.102	300.429	393.825	411.989	381.88	386.073	382.694	405.111	421.164	391.179	464.866	456.656
ENSG00000050030	43.4155	29.3639	7.81172	4.84556	15.6042	10.5985	130.467	153.005	29.2372	49.1457	21.4354	34.8639	21.5605	35.2545	15.4472	67.9515
ENSG00000050130	2357.06	2394.28	1780.05	1736.81	1765.65	1716.73	2162.22	2501.18	2212.78	2334.43	2312.99	1992.6	2244.46	2058	2341.74	2126.39
ENSG00000050165	7067.11	4589.04	4279.37	4500.61	4156.78	3977.83	7810.82	8764.52	6140.45	7075.29	6297.75	6448.35	7713.52	6211.5	6859.41	6270.19
ENSG00000050327	27.6458	50.5802	22.3395	12.2262	5.81646	0	10.1282	13.5633	8.88551	12.8844	10.7047	27.7476	34.0881	26.1481	4.98388	31.371
ENSG00000050344	0	1.85233	7.89943	6.2143	2.6303	5.12146	2.94115	5.83419	0	4.51716	2.67688	0	4.26511	0.891486	0.884143	3.55769
ENSG00000050393	847.232	908.142	606.664	758.8	637.295	649.068	1048.19	1095.31	586.178	920.148	627.004	625.622	998.675	733.603	778.689	830.772
ENSG00000050405	2290.31	6785.81	2764.12	3448.93	2461.08	3545.76	6409.81	7509.26	6202.11	2634.53	6806.46	2063.28	6849.06	1980.27	5787.66	5384.54
ENSG00000050426	999.285	946.66	1263.08	950.114	929.881	805.431	1014.95	1168.76	735.807	1041.6	774.598	853.731	707.203	821.96	859.424	943.124
ENSG00000050438	763.776	267.132	302.289	253.188	316.784	256.806	836.33	965.797	679.666	797.085	456.743	398.907	688.802	519.709	614.445	467.687
ENSG00000050555	641.316	579.371	1478.02	1194.16	1571.79	968.799	588.432	416.424	540.015	528.582	638.289	385.092	399.761	599.91	524.279	618.134
ENSG00000050628	5.74624	13.9471	17.5539	24.6661	10.6921	6.73428	34.9878	44.9749	24.6369	3.25849	23.8819	4.12506	14.9696	7.40009	18.6566	5.75842
ENSG00000050730	49.8468	85.3456	62.1899	123.656	54.5756	59.5416	224.184	284.268	23.6499	61.2556	20.1227	37.3557	34.0185	50.8272	31.9976	122.472
ENSG00000050748	1476.12	1707.38	784.638	723.64	752.141	766.799	1281.86	1476.5	1106.85	1481.63	1148.38	1422.7	1222.19	1275.26	1225.09	1608.98
ENSG00000050767	0	0	1.03569	1.048	1.0347	0.825671	0	0	0	0	0	0	0	0	1.04341	0
ENSG00000050820	1456.41	2242.58	1578.48	1635.75	1708.82	1629.14	1749.06	1819.05	1166.95	1304.46	1523.16	1206.63	1687.8	1349.71	1283.84	2084.13
ENSG00000051009	641.619	610.007	1004.41	801.27	920.249	750.838	644.95	685.285	594.09	570.163	623.459	497.858	536.259	538.238	604.749	618.233
ENSG00000051108	1322.54	1744.68	1165.32	1065.24	1236.77	1084.36	1994.13	2124.72	2366.76	1273.94	2356.69	1300.92	2305.36	1039.24	2191.91	1556.38
ENSG00000051128	838.475	749.838	499.245	474.825	465.171	418.448	1036.14	1003.49	636.94	711.58	759.742	667.482	650.684	609.774	674.77	819.933
ENSG00000051180	485.51	281.95	230.138	221.744	202.449	152.828	77.6505	134.42	212.949	514.166	248.005	511.31	261.623	554.073	242.44	374.68
ENSG00000051341	1961.06	810.606	2966.92	1574.86	2138.44	1660.45	380.426	452.443	1053.08	2085.46	908.85	1389.56	1149.88	1660.42	1227.13	910.685
ENSG00000051382	954.731	757.897	358.232	432.115	366.756	327.4	437.547	596.196	610.839	803.584	689.36	724.225	619.229	883.21	704.581	661.819
ENSG00000051523	10.2656	0	14.5258	14.3133	7.60242	1.40273	4.8038	5.20283	1.18532	1.4859	5.30818	1.21503	2.0578	4.11928	2.27392	26.0911
ENSG00000051596	749.205	651.306	574.572	548.685	552.779	428.271	669.691	869.725	559.925	836.491	625.887	617.95	720.632	601.693	551.326	969.488
ENSG00000051620	1328.5	1743.92	1254.65	1539.48	1364.28	1308.65	1875.5	2287.33	1118.34	1230.29	1333.59	1238.94	1769.51	1161.45	1271.11	1705.38
ENSG00000051825	1961.41	1394.78	1258.74	969.495	1058.98	1061.83	1136.63	1517.01	1504.43	1746.18	1265.1	1609.61	1531.4	1803.96	1528.99	1753.04
ENSG00000052126	2298.83	1344.09	1220.06	1091.54	1199.85	1059.51	1860.17	2125.08	1277.77	2176.41	1225.91	1839.16	1752.95	1996.56	1620.56	1358.98
ENSG00000052344	2.77987	11.4661	7.89825	19.6246	12.0258	9.32206	30.3147	39.0331	8.80749	12.9693	5.01165	8.71137	9.15875	16.0538	4.60426	20.064
ENSG00000052723	1680.93	2403.4	879.869	1271.04	953.73	1147.88	2238.47	2729.22	1691.32	1614.17	1844.52	1415.08	2094.4	1410.3	1970.01	2000.61
ENSG00000052749	1159.68	2122.32	1712.02	1560.7	1363.33	1668.89	821.255	794.44	1572.49	1138.7	1656.28	864.663	1369.74	989.843	1289.79	1730.08
ENSG00000052795	564.529	640.956	382.952	310.032	281.886	221.028	530.178	469.634	379.467	522.821	283.983	522.782	379.308	511.311	419.331	858.351
ENSG00000052802	1574.37	2049.86	1172.49	1124.85	899.229	1013.57	906.943	1066.19	2196.76	1535.32	2065.63	1494.53	2241.63	1427.32	2337.26	1892.81
ENSG00000052841	1649.75	1393.04	2318.45	1796.61	2240.2	2052.14	1816.79	1823.82	1374.82	1368.76	1139.23	1000.75	1556.39	1085.47	1337.56	1206.02
ENSG00000052850	0	53.0897	37.5366	47.9453	53.2798	32.7738	72.8651	82.572	1.96637	1.98679	0	0	0	0	0	93.2327
ENSG00000053108	74.1691	31.2814	31.3138	4.98009	15.0283	9.56004	32.0046	45.5578	23.5046	53.2257	38.828	51.4741	40.0153	29.6456	42.5221	13.8493
ENSG00000053254	4633.69	2187.17	625.625	641.789	767	726.776	3596.28	3323.74	2299.69	4559.21	2431.7	3614.72	2771.48	4176.74	2924.58	2713.7
ENSG00000053328	0.976991	1.95879	0.963019	0.975828	0.96254	0	4.73501	2.38977	0	1.94426	0	0.986843	0	0.982304	0	0
ENSG00000053371	829.712	1022.73	551.231	662.891	554.127	454.105	915.581	1062.38	615.908	756.679	805.871	720.879	718.133	671.893	737.074	1059.67
ENSG00000053372	1177.94	3015.47	1691.18	1940.88	1597.03	1606.8	1001.4	1181.35	1227.86	1251.55	1396.05	917.211	1234.96	923.293	1221	2984.22
ENSG00000053438	0	0	0	0	0	0.992612	0	0	0	0	0	0	0	0	0	0
ENSG00000053501	253.454	232.266	163.909	230.351	157.186	136.354	263.02	321.219	227.917	192.547	259.05	200.262	293.886	155.415	243.122	248.098
ENSG00000053524	106.483	109.326	71.0501	82.0157	54.0364	31.3995	126.043	173.574	65.304	85.3067	62.7933	122.688	75.6723	76.377	80.5808	69.7266
ENSG00000053702	1.00362	1.91052	0	1.04921	0	0	0	0	0.90599	0	0	0	0.975059	0	0	1.99985
ENSG00000053747	23.0121	62.9493	14.093	3.57775	41.612	7.05559	26.9988	24.7501	30.7211	35.9493	32.9433	13.6461	46.5165	17.498	31.3964	64.5817
ENSG00000053770	2004.81	1924.82	741.126	909.435	747.494	840.82	1427.29	1511.61	1765.53	1811.84	1887.78	1683.13	2097.26	1709.41	2048.15	1875.06
ENSG00000053900	547.859	606.033	647.466	599.468	638.708	575.106	297.937	389.272	349.227	518.591	383.655	381.008	405.614	422.78	391.762	522.278
ENSG00000053918	15.2813	7.5421	1.98905	8.78336	2.64932	1.33377	6.52081	17.5681	12.1566	4.00321	13.2186	13.7719	8.37488	30.6655	21.2474	12.1923
ENSG00000054116	1378.85	1947.93	1164.63	1326.46	1037.84	1084.78	1365.65	1662.74	1280.92	1280.84	1565.81	1153.82	1495.6	1178.34	1387.04	1925.64
ENSG00000054118	7331.8	5633.41	4257.03	3830.9	3338.14	3250.74	3750.78	3849.33	5875.19	7255.42	5278.92	5878.98	6668.3	6107.08	5701.95	5506.72
ENSG00000054148	1448.97	1903.34	1170.39	1511.58	1380.93	1295.47	1824.03	2106.04	1825.47	1249.18	2156.36	1179.99	1908.14	1148.66	1925.11	1921.32
ENSG00000054179	0	0	0	0	0	0	0	0	0	0	1.00418	0	0.95746	1.00554	0	0
ENSG00000054219	3.01015	3.11752	10.8556	3.31131	4.73983	8.18334	3.89393	2.13139	4.07246	3.06939	1.94228	3.93473	0	2.36498	7.60378	5.09634
ENSG00000054267	1397.12	1302.62	1369.29	1157.74	1062.08	1013.25	1323.75	1239.68	1409.59	1239.07	1163.05	1168.96	1434.29	1152.72	1334.52	1114.24
ENSG00000054277	78.6885	88.4352	24.4345	34.2848	29.4248	36.3386	93.2605	88.5316	307.213	73.7475	298.723	90.3742	287.247	94.2493	282.213	47.2592
ENSG00000054282	244.676	234.49	114.109	113.926	132.94	113.269	277.674	202.489	287.466	192.514	288.958	265.932	336.702	165.482	248.016	179.396
ENSG00000054356	4147.89	4189.27	4504.87	3981.35	3338.87	3150.07	4073.61	4006.17	4879.65	3830.12	4580.3	3343.06	4072.44	3507.09	4422.3	4527
ENSG00000054392	1340.03	845.409	556.535	555.548	531.927	545.455	1031.65	1085.61	1115.74	1124.58	1238.6	1124.93	1326.95	972.528	1244.57	828.766
ENSG00000054523	3795.55	2871.44	1052.06	1105.85	968.745	1040.74	2563.22	2735.06	2540.01	3526.8	2323.04	3057.55	2550.65	3038.45	2805.62	2754.98
ENSG00000054598	223.198	200.359	113.578	113.873	119.373	139.049	358.428	328.221	365.815	228.525	340.359	215.404	388.77	191.573	323.327	194.209
ENSG00000054611	797.267	630.278	300.236	371.701	278.513	298.229	398.195	464.525	450.097	725.413	520.147	675.513	494.443	684.492	499.149	785.016
ENSG00000054654	8453.73	1624.41	4081.12	3416.24	4254.66	3086.67	3289.99	3052.72	2992.78	6175.41	3231.87	4452.54	3483.52	5453.64	3620.81	2164.08
ENSG00000054690	1115.15	674.354	1180.62	969.376	876.079	840.538	964.019	756.194	1020.15	1087.84	901.222	786.205	1071.12	887.978	955.027	561.404
ENSG00000054793	1457.9	1419.08	1219.71	1092.08	1387.08	1172.32	2984.96	2982.97	761.346	1334.02	753.592	1227.23	816.224	1136.6	972.834	1869.78
ENSG00000054796	0	0	0	0	0	0	0	0	0	0	0	0	0	0	0	0
ENSG00000054803	11.0105	3.0061	1.97513	1.99809	0.986583	1.98678	15.5405	15.3501	14.7554	6.9574	8.03218	11.0784	18.2297	6.02062	14.923	4.9985
ENSG00000054938	0	0	0	0	0	0.992628	0	0	0	0	0	0	0	0	0	0
ENSG00000054965	3464.53	2479.35	1019.24	993.352	982.569	827.432	3010.03	3397.11	2164.23	3125.47	2122.91	2783.38	2362.61	2744.45	2460.73	2666.66
ENSG00000054967	320.135	563.507	719.639	542.447	585.238	538.87	467.81	399.164	422.533	321.365	536.437	293.53	385.728	332.498	503.99	474.631
ENSG00000054983	2095.71	584.986	309.12	297.275	336.062	305.171	792.99	903.937	1677.85	1840.15	1928.1	1613.21	2293.23	1558.83	1865.51	510.147
ENSG00000055044	3266.54	4138.71	5149.73	4204.71	4479.82	4384.34	2069.8	2353.34	2962.11	3779.44	2903.64	2696.18	3675.49	2959.84	2940.25	4003.26
ENSG00000055070	4427.5	8232.85	2234.39	3181.46	2181.35	2333.56	4447.03	4880.08	4260.9	4088.15	4226.95	3902.3	4449.27	3663.37	4369.86	7906.24
ENSG00000055118	161.075	155.099	235.938	243.277	184.256	94.8711	310.116	296.175	50.3257	117.008	57.1918	138.31	58.6587	110.973	61.6696	311.87
ENSG00000055130	769.81	970.023	580.651	622.032	538.48	528.185	708.528	823.933	683.209	786.46	710.416	630.684	830.237	656.588	710.037	973.828
ENSG00000055147	804.737	678.561	367.685	411.947	355.287	345.135	637.461	706.558	771.743	730.503	540.524	598.764	865.486	756.846	770.058	758.254
ENSG00000055163	2443.69	3404.08	2523.1	2324.68	1959.86	2394.34	4541.81	4205.41	3596.66	1960.5	3655.13	1510.62	3284.78	1909.32	3556.41	3409.82
ENSG00000055208	4620.12	4819.94	2004.29	2357.42	1735.36	2126.48	4572.37	4980.15	3809.33	4540.2	3644.66	3801.26	4195.38	4040.43	4323.44	4755
ENSG00000055211	1819.74	1227.46	1099.93	1194.37	1128.11	1022.12	1782.98	1962.28	1416.91	1728.08	1467.75	1548.68	1718.51	1632.83	1685.57	1235.06
ENSG00000055332	3311.33	3232.77	1289.74	1648.67	1219.01	1113.45	2474.18	2582.39	2128.12	3372.09	1978.36	2734.18	2377.25	2896.57	2324.44	3094.21
ENSG00000055483	1989.59	2599.92	1835.31	1265.32	1826.33	1801.58	2246.18	2360.27	2152.05	2251.57	2054.94	1847.98	1744.17	1867.46	1871.18	2360.92
ENSG00000055609	560.851	273.029	485.431	396.031	470.267	319.793	278.898	298.566	345.983	369.848	454.398	305.019	210.626	401.256	506.967	351.468
ENSG00000055732	1.01635	1.89597	6.14348	3.17343	2.89009	3.28608	0	1.9442	1.84691	2.52467	0.980384	0.983695	1.87454	0	3.88584	1.03304
ENSG00000055813	137.655	85.1504	16.0981	10.5486	30.7077	29.0162	203.205	193.722	67.1218	134.77	77.5802	115.987	95.0372	119.698	82.9931	91.3312
ENSG00000055917	4226.62	3666.75	2707.48	2620.88	2381.07	2540.96	2061.26	2051.59	3417.72	3622.61	3004.11	3635.32	2837.02	3097.65	3978.24	3647.74
ENSG00000055950	1258.91	1111.27	752.016	947.714	799.712	789.786	966.775	1173.73	1227.92	1152.42	1327.95	1102.71	1391.51	1057.09	1256.7	1081.68
ENSG00000055955	45.641	49.663	106.81	86.8329	91.4335	82.3785	4.47194	34.2705	34.1225	64.7586	24.6331	26.4536	47.5265	63.3861	29.3711	36.9972
ENSG00000055957	0	0	0	0.523688	0	0	2.25518	2.74935	0.950883	0	0	0	0.860706	0	0	0
ENSG00000056050	611.934	547.445	478.951	529.18	417.897	390.141	595.118	745.256	404.417	638.926	357.911	517.404	502.292	568.658	431.793	602.279
ENSG00000056097	5162.26	6171.74	3381.13	3461.26	2922.67	3037.52	4338.32	4868.69	5529.1	5718.41	5338.33	4194.09	6999.06	4623	5644.14	5805.79
ENSG00000056277	273.979	216.311	156.826	156.389	153.946	139.226	205.386	214.026	221.811	282.67	202.175	216.668	250.085	215.688	239.24	215.972
ENSG00000056291	714.032	458.353	573.679	458.73	416.531	336.392	376.933	438.668	423.699	720.627	398.618	643.793	491.541	663.214	485.672	536.289
ENSG00000056487	294.185	202.262	125.624	122.67	205.726	179.752	714.273	690.271	160.34	260.016	183.312	330.066	302.039	220.675	216.908	240.176
ENSG00000056558	53.3076	1133.04	455.073	531.87	181.45	330.744	137.336	142.09	124.74	51.8569	142.923	48.7306	110.061	33.0205	110.791	670.589
ENSG00000056586	1375.84	1769.99	584.851	624.742	496.571	515.428	1301.71	1179.5	1703.76	1528.02	1448.83	1327.45	1553.65	1298	1653.93	1802.85
ENSG00000056736	154.715	38.045	87.9236	58.8737	68.678	49.5466	94.4335	114.506	49.8349	115.248	50.0612	111.44	57.7249	118.431	70.2339	38.1497
ENSG00000056972	295.027	265.268	177.842	281.142	153.97	161.651	356.564	380.791	186.59	241.437	209.526	226.784	184.193	288.497	228.647	396.138
ENSG00000056998	487.41	249.837	144.146	164.391	162.166	111.453	457.496	504.041	185.169	454.389	228.141	381.118	271.752	410.966	328.075	348.065
ENSG00000057019	19144.5	9076.47	4930.03	4376.63	5688.35	5532.66	11005.7	12446	16478	20399.7	13760.8	16627.8	17951.8	17578.3	15190.8	9618.63
ENSG00000057149	1.0667	0	0	0	0	1.05925	55.3849	64.6601	5.24724	0	3.82199	1.07605	6.38084	0	8.52105	0
ENSG00000057252	2028.41	2745.51	1239.71	1445.29	1016.08	1283.57	1755.67	1853.89	1901.97	2130.72	1739.77	1834.83	2042.43	2015.32	2112.37	2588.85
ENSG00000057294	2070.95	1215.79	554.407	469.3	374.235	491.088	903.91	821.479	1173.68	2337.37	1240.09	1781.43	1275.17	1965.75	1535.73	1381.95
ENSG00000057468	3.00357	5.01108	10.8664	8.99331	4.93411	12.9168	1.94309	0.959745	3.93541	4.97035	5.02138	0	1.91968	0	5.9707	3.0012
ENSG00000057593	1.04058	1.04187	1.02652	0	0	0	1.00958	0	4.0916	1.03356	3.46273	3.14263	2.4815	0	2.06834	0
ENSG00000057608	8030.18	9309.47	4563.01	5339.88	4153.8	4288.17	7067.82	8638.65	6030.77	8490.02	5964.82	7252.38	7816.35	7443.2	6801.07	9187.76
ENSG00000057657	166.001	65.3482	38.4975	27.0874	41.5695	29.172	297.03	333.55	172.494	153.434	168.569	150.675	196.246	176.24	195.202	79.6789
ENSG00000057663	888.173	920.187	436.37	547.828	530.583	493.737	905.855	1044.34	662.378	1049.19	760.799	1005.28	773.701	925.416	732.526	990.196
ENSG00000057704	73.6993	19.4131	11.3106	18.0625	7.33345	9.02185	73.1389	82.8912	55.2462	38.6178	48.045	58.8957	43.2934	59.0436	65.0423	10.3171
ENSG00000057757	919.553	1201.13	988.774	997.869	726.431	734.908	653.567	760.26	981.103	1008.48	1084.11	811.266	1059.41	846.566	1016.54	1128.01
ENSG00000057935	1888.25	1486.89	1127.4	1324.88	1173.11	1077.47	2298.53	2774.47	1291.87	1845.83	1254.58	1696.49	1678.69	1589.97	1584.55	1672.19
ENSG00000058056	2581.13	1275.82	571.16	605.899	640.639	547.661	755.979	911.507	1260.43	2348.95	1108.15	1846.72	1302.31	2011.74	1499.62	1501.41
ENSG00000058063	5385.77	3591.59	1310.07	1355.13	1145.12	1321.48	4233.86	4804.62	4854.75	4858.02	4562.49	4336.73	5523.39	4347.11	5008.85	3180.01
ENSG00000058085	2286.74	4467.42	1945.79	2343.04	907.59	1186.41	2786.9	3028.3	2450.61	2284.62	2200.56	2152.25	2677.99	1745.27	2191.52	3609.78
ENSG00000058091	3730.91	2431.84	710.251	737.733	768.791	685.895	2829.14	3270.06	1998.03	3340.26	1875.64	3522.67	2860.94	3310.59	2490.06	3282.54
ENSG00000058262	8490.58	10124.6	6839.29	7173.31	4022.48	4525.5	5243.43	5851.81	8500.51	8360.46	8692.26	7070.7	7517.23	6772.36	8317.32	9533.33
ENSG00000058272	2514.87	2079.87	1005.66	950.14	858.645	1007.45	2644.39	2591.26	2206.07	2866.21	1799.9	1625.51	2742.98	2504.26	1799.9	1951.34
ENSG00000058335	1778.58	2054.86	651.169	984.912	360.315	815.116	1373.9	1372.18	3141.81	1644	2906.07	1764.57	3318.47	1351.17	2783.37	1586.38
ENSG00000058404	33.1969	14.4723	13.2873	18.3354	19.1549	10.7444	34.6156	44.1071	25.9155	13.4028	33.3041	9.332	44.1485	31.3795	30.1833	14.482
ENSG00000058453	465.161	404.325	1100.99	668.985	828.829	711.363	522.178	548.362	292.707	417.701	271.432	440.971	335.768	321.587	289.476	423.579
ENSG00000058600	1225.6	1117.1	1083.3	764.147	716.269	687.683	865.157	876.44	1253.4	1089.18	1353.9	901.371	1151.34	857.927	1094.49	1077.63
ENSG00000058668	2513.08	1498.24	2245.45	1769.68	1482.29	1175.39	3497.95	3605.21	1219.42	2278.91	1108.01	1853.89	1288.16	1916.17	1472.87	2152.55
ENSG00000058673	7411.46	5919.43	7118.85	5837.19	6301.41	5814.17	6697.68	6881.01	6199.48	6701.82	6067.17	5616.11	6755.21	5842.13	6619.69	6247.33
ENSG00000058729	545.388	956.391	711.584	795.993	693.021	799.873	663.718	874.802	607.225	498.365	709.172	463.446	769.999	552.837	674.54	780.596
ENSG00000058799	527.188	647.548	548.09	589.144	463.7	485.657	776.814	867.413	548.162	534.595	603.347	488.72	635.871	410.973	648.935	661.094
ENSG00000058804	2224.43	2157.97	1660.44	1597.55	1412.78	1414.69	1044.49	1154.46	1438.47	2341.06	1536.9	1995.97	1553.66	2145.26	1659.08	2392.68
ENSG00000058866	308.821	218.586	112.245	117.386	43.6474	36.1493	171.225	210.367	183.162	276.894	153.434	237.986	193.672	206.447	214.331	248.525
ENSG00000059122	744.852	930.361	873.141	953.787	833.443	976.331	1132.46	1091.75	1125.78	780.227	1415	639.862	1296	732.049	1297.77	698.952
ENSG00000059145	844.888	1134.04	757.619	669.561	766.686	579.462	692.509	788.21	985.675	937.835	1283.44	653.024	1164.25	708.897	1150.67	887.586
ENSG00000059377	17.5883	27.2236	11.1598	13.1436	22.3134	12.0011	3.52682	17.6567	4.2469	12.7114	7.30363	11.6192	8.88342	28.5795	19.5492	18.561
ENSG00000059378	473.575	627.188	705.659	584.529	464.18	430.642	480.007	548.842	288.435	365.973	305.952	274.044	303.379	395.523	272.554	633.488
ENSG00000059573	3311	3645.27	2367.56	2712.56	2246.75	2253.81	2726.05	3192.28	3163.8	3317.52	2795.86	3049.81	2895.43	2916.55	3143.56	3658.57
ENSG00000059588	223.297	159.984	445.152	292.395	417.25	286.025	156.114	124.796	125.55	123.273	128.901	149.074	96.2383	145.528	119.567	130.642
ENSG00000059691	410.07	463.367	242.5	335.002	242.46	322.433	345.977	378.657	396.693	363.034	394.663	296.274	474.379	335.628	413.53	485.543
ENSG00000059728	108.302	163.191	82.3469	58.6508	43.6294	80.3888	144.886	178.061	323.097	63.0754	250.314	84.1494	230.58	36.3658	278.245	133.8
ENSG00000059758	604.217	782.776	399.266	351.801	296.591	319.353	559.673	579.828	615.152	654.802	745.165	497.337	642.006	570.455	689.959	663.032
ENSG00000059769	161.189	217.523	375.354	303.384	290.901	308.561	293.883	293.582	216.529	185.639	188.31	126.286	256.875	134.998	182.477	224.149
ENSG00000059804	1898.9	1299.77	1021.83	1040.86	955.227	987.416	4568.97	5240.72	2985.88	1637	2994.63	1716.19	3321.92	1304.73	2990.45	1167.92
ENSG00000059915	175.77	70.7355	30.7288	26.8124	65.7952	42.8976	196.824	212.793	138.426	183.449	133.962	245.424	235.923	141.487	145.94	84.8992
ENSG00000060069	606.125	840.403	525.085	508.895	501.287	552.38	655.383	703.525	389.49	455.932	532.825	454.683	466.021	467.224	471.329	801.567
ENSG00000060138	6230.57	9786.38	6446.67	7171.78	6348.36	7631.55	10408.2	11258.9	12043.5	5975.05	12489.5	4937.01	12373.6	4965.57	11746.6	8171.39
ENSG00000060140	145.826	133.941	173.12	139.815	102.045	98.2609	61.3651	65.2761	83.8022	167.146	143.685	94.8068	101.529	153.855	105.446	144.223
ENSG00000060237	9967.46	7804.9	4337.68	3764.21	4413.9	4410.37	5587.61	5826.65	7319.51	9502.14	5842.16	6471.02	6847.45	8499.49	6925.77	9073.28
ENSG00000060303	0.990809	0	0	0	0	0	0	0	0.995769	1.98898	0.99215	1.01724	0	2.01734	0	0
ENSG00000060339	3458.67	3379.07	5328.18	3766.24	5339.43	4799.87	2272.28	2508.44	2954.13	3658.34	2634.9	2718.11	3283	2711.87	3065.27	3387.1
ENSG00000060491	1587.91	1711.36	796.711	921.02	1118.8	1175.32	1426.08	1516.24	1579.99	1265.19	2295.49	1406.75	1822.71	1220.44	1795.86	1521.63
ENSG00000060558	0	10.8991	0	8.8895	2.92541	4.9111	5.75926	0	21.4022	0	14.8858	1.99287	18.9498	0.992583	14.8121	2.95691
ENSG00000060566	1.8405	0	3.34302	4.59281	1.81398	2.7402	19.6436	21.1627	0	3.33012	0	3.70503	0	0.92278	0.914609	2.75445
ENSG00000060642	429.316	332.522	299.762	298.647	233.11	247.134	345.798	395.132	466.35	455.713	469.477	409.535	441.802	398.782	484.678	333.274
ENSG00000060656	1512.99	1874.89	1239	1554.05	1017.97	1237.2	3189.71	3356.54	1461.22	1200.6	1397.53	1167.55	1841	1133.13	1824.89	2042.89
ENSG00000060688	1667.12	1889.68	1590.08	1588.33	1635.7	1532.25	1072.78	1193.13	1267.51	1805.89	1429.77	1645.2	1340.83	1655.08	1469.76	2168.01
ENSG00000060709	64.1035	61.8675	50.3557	45.0301	22.0736	5.96923	128.092	114.733	33.9271	92.4498	21.6695	59.8802	49.7875	35.9377	59.3055	69.5151
ENSG00000060718	8129.56	1462.49	1849.79	1731.62	3150.06	2394.71	6139.64	6207.93	5755.11	8643.18	5834.05	7052.37	7047.53	7012.08	6267.43	1494.07
ENSG00000060749	5036.87	5228.06	2125.4	2136.01	1952.18	2108.44	2843.84	2952.72	3906.06	4999.31	3346.13	3909.51	3660.85	4479.62	3969.69	5483.29
ENSG00000060762	332.261	473.163	253.037	352.097	276.842	275.104	478.956	500.034	277.361	323.036	349.083	303.231	333.117	293.629	321.908	454.868
ENSG00000060971	755.916	836.817	1034.63	1050.33	990.66	762.161	745.887	745.962	726.429	726.848	806.75	522.721	858.89	595.918	797.88	823.798
ENSG00000060982	6002.14	4754.93	2014.36	1729.64	1991.27	1936.35	3317.03	3709.76	2983.46	6717.71	3320.34	5365.68	3169.31	4927.09	3466.16	5266.06
ENSG00000061273	3453.43	3555.6	3891.89	3198.04	3620.8	3305.73	2925.56	2760.3	2506.88	3292.63	2607.44	2637.43	2779.41	2606.41	2671.17	3744.82
ENSG00000061337	364.545	165.988	110.481	110.017	82.4843	93.3708	295.876	322.981	314.115	352.152	390.193	282.055	282.293	335.236	349.345	204.965
ENSG00000061455	24.5546	0	1.87723	36.9675	6.86711	23.2895	14.3892	1.82503	1.86788	38.2588	1.43108	0.477778	2.28236	7.77613	6.92495	6.74068
ENSG00000061492	0	0	0	0	0	0	0	0	0	0	0	0	0	0	0	0
ENSG00000061656	28.8551	115.459	199.827	178.309	198.715	200.141	199.889	293.436	58.2279	49.9473	83.6224	24.7195	32.2231	30.5348	39.6898	58.8335
ENSG00000061676	7850.01	7989.54	4997.67	4887.97	4599.96	4693.94	6917.56	7534.5	6046.51	7642.75	5955.6	6820.53	6215.07	7010.11	6837.69	8400.91
ENSG00000061794	1060.35	1512.26	738.258	1012.58	858.066	821.686	992.65	1221.79	890.093	1110.47	998.546	943.332	1095.01	932.568	942.93	1362.18
ENSG00000061918	190.373	129.912	58.2533	66.6111	80.5255	57.8235	224.565	331.378	107.245	192.004	134.191	146.047	144.55	133.932	150.445	120.437
ENSG00000061936	1424.4	1388.47	1313.59	1108.73	908.994	1036.81	1636.48	2177.22	1361.66	1536.23	1114.22	920.048	1433.37	1090.97	1335.38	1487.53
ENSG00000061938	1261.94	835.728	934.532	868.55	947.268	797.681	959.707	957.256	633.273	1011.66	717.819	959.825	673.597	987.398	751.997	870.271
ENSG00000061987	1309.76	1303.91	2207.19	1439.07	1840.86	1603.63	1362.9	1614.04	1156.39	1231.07	1127.62	1058.27	1201.61	1035.37	1145.86	1077.12
ENSG00000062038	13.2654	10.8522	33.8371	14.143	13.2657	15.0942	27.6644	12.2819	13.2267	16.0831	7.50725	7.64193	6.35439	16.7153	15.1469	5.13168
ENSG00000062096	3.54203	0.950182	1.02365	0	0	0.941661	0	1.98758	0	2.06224	0	0.955231	0.993561	1.04125	1.03138	0
ENSG00000062194	2804.46	2110.67	2717.46	2114.11	2278.79	2189.85	2434.79	2702.44	1977.51	2819.36	2221.82	2363.37	2671.67	2513.48	2396.39	2064.91
ENSG00000062282	223.019	536.709	557.254	675.786	396.088	349.382	404.311	361.753	133.726	218.478	168.971	230.117	168.375	214.626	210.907	586.25
ENSG00000062370	185.327	181.652	143.744	162.756	161.48	97.1175	231.5	291.146	143.131	193.283	135.632	149.95	163.46	165.758	145.293	190.987
ENSG00000062485	7740.39	8147.85	4713.9	4764.33	4437.8	4167.27	5841.88	6153.62	5782.05	6919.33	5391.36	6028.69	4818.03	6323.95	6068.7	9041
ENSG00000062524	25.0278	15.2901	31.8232	21.0413	29.1273	22.5093	15.1122	14.3036	38.1613	27.4874	28.842	21.4725	23.884	12.4193	25.5495	18.8262
ENSG00000062582	1663.95	2259.37	1290.23	1699.36	1312.52	1333.06	1665.76	2069.72	1585.54	1627.88	2015.97	1469.36	1951.6	1402.96	1873.82	2317.85
ENSG00000062598	1992.58	1657.19	1565.27	1354.91	1716.68	1537.04	1705.91	1895.15	1684.71	1774.71	1593.53	1546.32	1600.35	1614.04	1817.17	1667.53
ENSG00000062650	3849.2	4041.84	2726.21	2665.24	2647.95	2804.59	2606.61	2912.28	3187.52	3946.61	3446.85	3037.66	3261.6	3292.59	3200.75	4191.48
ENSG00000062716	17551.6	7196.55	9464.59	7822.42	14012.5	7928.23	14793	15430.2	11781.6	16432.7	10929.7	14629.4	15598.5	16063.5	14097.1	7113.24
ENSG00000062725	3315.18	2282.18	861.595	952.275	1179.47	1150.5	1878.14	2305.2	2818.67	2862.95	2700.71	2466.16	2699.18	2451.53	2953.98	2407.26
ENSG00000062822	2498.98	1456.91	2430.01	1950.63	2643.69	2063.24	1086.34	1193.16	1246.51	2027.66	1624.8	2111.07	1342.63	2104.7	1536.52	1778.74
ENSG00000063015	0.612068	0	3.72661	3.78064	0.672683	0	0	0.654353	0.738896	0	1.36922	0	0	0	0	0
ENSG00000063046	23290.9	21203.3	6927.16	9054.85	6183.93	6988.04	23007.9	26227.3	18217.7	20122	17892.7	19141.6	23653.7	18868.9	21397.3	21503.5
ENSG00000063127	453.533	146.116	392.544	207.392	519.23	329.135	176.732	189.385	163.246	408.813	138.819	279.791	192.334	375.86	212.056	123.352
ENSG00000063169	512.859	328.143	265.178	164.995	286.66	260.733	359.157	312.244	280.713	419.022	319.29	407.152	257.683	405.25	384.978	369.393
ENSG00000063176	238.326	232.268	187.807	156.548	162.388	182.738	93.1526	103.146	231.799	168.064	342.765	163.754	223.015	191.446	240.061	202.432
ENSG00000063177	10229	10214.8	5233.78	7996.61	7424.79	7082.04	9624.88	11241.1	10481.7	8853.31	13107.1	8894.31	11399.7	8471.97	12488.6	9250.55
ENSG00000063180	1472.69	552.516	612.604	518.938	715.47	586.859	1219.25	1255.61	805.704	1175.34	901.31	1095.47	1275.2	1161.02	940.527	655.343
ENSG00000063241	854.171	718.464	419.931	550.279	418.645	360.027	526.61	573.887	872.656	631.857	1178.87	737.453	790.409	694.443	1025.11	715.367
ENSG00000063244	5448.07	5272.53	3980.19	3922.76	3860.74	3325.2	3104.75	3381.19	4992.15	4941.31	5280.68	4175.21	4830.26	4170.41	4836.11	5336.58
ENSG00000063245	2748.54	2335.55	761.174	1053.23	936.774	1023.05	1534.91	1608.36	1888.12	2010.01	2834.82	2735.13	2228.01	2331.57	2498.2	2127.9
ENSG00000063322	1462.89	1047.57	460.09	537.123	564.441	533.027	1105.46	1234.19	1382.87	1357.63	1295.61	1220.17	1294.06	1260.59	1275.33	1080.02
ENSG00000063438	404.11	142.05	172.767	178.161	160.038	210.543	205.703	179.424	338.402	327.298	339.988	300.723	302.17	287.55	345.355	160.93
ENSG00000063515	1.0072	0	0	0	0	0	1.95226	0.961805	0	0	0	0	0	0	0	2.97882
ENSG00000063587	910.684	948.467	638.558	602.798	576.382	623.076	806.871	872.51	1134.62	796.091	1159.68	740.691	1034.17	684.241	1100.83	978.309
ENSG00000063601	832.574	858.824	558.183	567.744	485.912	423.731	527.234	610.588	683.772	864.614	826.577	701.841	986.764	689.72	778.298	767.715
ENSG00000063660	15873.5	8518.37	4233.58	4490.71	3514.31	3940.04	8444.25	8087.37	13395.4	13315.9	16626.4	12699.2	15258.9	12360.7	15209.4	8723.93
ENSG00000063761	157.485	132.464	108.006	126.46	103.032	121.357	127.105	124.434	138.242	167.449	172.563	137.531	131.323	136.89	183.426	138.814
ENSG00000063854	629.666	506.789	357.763	440.876	393.957	330.464	692.65	841.878	671.307	539.26	819.337	481.298	803.915	465.6	837.46	399.973
ENSG00000063978	1474.59	1406.59	589.002	576.597	675.693	552.912	824.724	918.16	1042.42	1406.41	1095.5	1210.08	1270.22	1177	1144.96	1431.96
ENSG00000064012	1089.02	1110.1	719.115	698.919	643.831	586.458	944.184	1012.31	879.816	1190.84	996.821	904.784	1087.85	963.135	988.583	1197.59
ENSG00000064042	3460.64	2146.73	1643.85	1735.29	1285.9	1196.96	3163.13	3703.43	2073.28	3525.71	2070.22	2821.1	2335.39	2987.66	2216.03	2444.94
ENSG00000064102	938.823	1208.06	1198.42	1196.33	1175.88	1150.16	1084.4	1188.35	867.497	1066.66	1040.47	812.572	1111.21	914.101	975.935	1137.03
ENSG00000064115	5563.12	5897.92	3141.74	3383.62	2109.48	2761.22	6322.24	7659.68	6129.27	5668.84	6818.06	4921.15	7091.44	4690.62	6813.53	5789.55
ENSG00000064195	20.4613	14.6327	10.5737	14.5882	10.5633	13.5392	25.5249	21.4731	57.4623	23.6317	62.5467	18.6329	55.0822	6.83911	53.2609	10.6937
ENSG00000064199	480.569	494.297	434.13	493.206	383.438	347.845	590.287	692.823	349.605	430.981	378.903	370.579	570.06	423.383	408.755	473.025
ENSG00000064201	1.22198	1.57201	26.3631	14.5454	2.73539	1.06598	0	0	0.277459	0	0	0	0	0	1.53095	2.50506
ENSG00000064205	6.60347	11.711	24.9994	34.6578	12.1814	2.23023	8.28158	8.37217	2.90285	5.04911	7.0465	3.39785	2.42318	3.38332	3.347	16.3296
ENSG00000064218	18.0183	6.01352	4.93768	3.99675	3.94631	10.9294	19.4243	12.4681	10.8237	14.9131	9.03627	15.1145	15.3446	14.0538	11.9385	6.98911
ENSG00000064225	113.465	140.85	270.452	187.689	167.301	162.513	233.945	314.205	81.4817	80.7023	99.5532	98.6339	155.176	69.1844	141.752	124.809
ENSG00000064270	1.87302	1.97925	0.92729	2.38785	0.922943	1.49628	18.7125	2.5765	0	2.38039	0.539208	4.17849	0	0.538776	0	3.96757
ENSG00000064300	329.748	79.8097	31.0792	70.7328	48.5099	67.4018	713.676	786.039	591.139	213.047	712.084	244.57	688.193	230.863	686.868	48.2041
ENSG00000064309	750.05	535.057	309.61	305.033	225.579	207.529	656.476	817.986	297.633	567.915	350.03	490.429	385.285	487.733	415.152	630.914
ENSG00000064313	2648.55	3101.32	2295.04	2013.08	1775.05	1958.95	2210.14	2206.06	2349.11	2757.79	2351.55	2148.7	2319.71	2397.89	2799.61	2717.66
ENSG00000064393	2512.85	2424.85	630.615	598.241	641.935	642.067	2020.77	2000.37	2208.79	2266.52	1933.5	1677.79	1787.61	1840.99	2098.25	2641.41
ENSG00000064419	1701.63	1721.89	1122.66	1116.53	1042.38	1041.59	1352.84	1462.84	1197.39	1682.31	1229.38	1476.39	1142.83	1566.17	1293.15	1961.25
ENSG00000064489	105.469	27.9039	49.1561	55.0137	3.16481	30.8204	74.5556	74.1695	39.1295	39.8586	15.7371	73.5886	101.969	82.4427	146.786	115.857
ENSG00000064490	572.239	453.426	425.708	466.02	439.41	359.466	394.602	412.59	343.648	539.762	466.979	458.724	339.459	461.355	387.136	460.533
ENSG00000064545	205.655	203.294	266.832	400.454	382.023	329.858	220.913	277.021	145.112	164.767	175.777	133.071	159.159	156.184	209.147	201.743
ENSG00000064547	135.844	88.2167	300.493	195.048	284.105	244.058	171.407	97.3216	107.277	92.6293	88.0905	58.3596	80.2858	93.2402	105.57	75.6265
ENSG00000064601	3659.09	4114.9	5473.69	5246.85	4701.3	4151.22	4827.46	5460.71	3073.53	3371.48	3132.47	3068.4	3495.64	2833.62	3251	4224.54
ENSG00000064607	2837.4	2199.81	3098.38	2486.83	3118.6	2333.87	2647.53	2971.06	2162.51	2908.1	1946.42	2172.06	2411.24	2470.29	2179.72	2379.13
ENSG00000064651	1887.08	1411.96	1099.18	972.263	870.393	953.804	1209.55	1157.49	1779.4	1668.68	1877.38	1534.25	1730.59	1596.09	1821.8	1309.38
ENSG00000064652	805.247	726.833	371.335	373.135	377.371	476.685	702.29	815.07	713.505	852.335	719.719	725.807	772.756	766.969	721.1	596.904
ENSG00000064655	195.262	39.0749	22.4533	15.4088	59.0673	49.0242	145.466	140.072	199.142	184.565	185.436	146.252	327.397	192.424	201.255	56.3219
ENSG00000064666	4354.12	4456.78	2412.84	2672.2	3031.55	2808.37	3524.5	3648.7	3009.43	3900.79	3264.57	3473.4	2769.09	3571.46	3359.23	4887.51
ENSG00000064687	239.057	109.754	384.521	346.899	400.325	349.222	196.215	190.782	180.224	128.225	266.961	101.406	170.103	175.544	220.034	225.97
ENSG00000064692	38.9825	1.26391	13.0895	8.32545	1.94818	6.49551	10.0073	16.4478	55.6772	31.191	29.7994	38.3504	43.9026	11.8441	63.2625	0
ENSG00000064703	1124.3	1509.04	1017.19	958.456	922.165	985.153	690.477	843.106	1278.8	1135.08	1304.25	953.008	1257.85	1039.12	1339.09	1280.04
ENSG00000064726	2424.28	2652.85	1112.54	1274.21	1110.84	1211.92	2260.33	2553.65	2403.51	2541.96	2536.82	2189.85	2879.95	2196.58	2514.33	2399
ENSG00000064763	123.838	100.435	54.2007	104.927	51.4486	44.6411	77.1774	57.6265	71.3309	86.9407	89.497	120.721	104.488	97.2743	91.6955	147.62
ENSG00000064787	5.33696	1.84192	10.9367	1.32718	7.06721	0	9.84433	11.8024	6.29173	4.88301	0.927646	7.42616	4.45571	0.730539	2.0458	1.74442
ENSG00000064835	0	0	0	0	0	0	0	0	0	0	0	0	0	0	0	0
ENSG00000064886	54.0052	29.5716	12.9707	9.95822	23.271	32.2522	31.9323	37.2502	37.1419	35.8665	23.7025	44.1958	35.2933	27.0242	33.2887	21.4224
ENSG00000064932	625.383	899.935	962.411	823.822	622.55	564.892	957.807	855.02	752.375	537.82	907.101	528.401	866.297	517.731	859.514	622.572
ENSG00000064933	577.476	600.799	801.325	683.693	839.198	758.159	533.249	709.056	497.85	915.988	445.891	489.604	520.888	465.674	506.952	594.148
ENSG00000064961	2552.18	1665.25	2029.57	2092.77	2029.03	1782.96	2300.44	2640.81	1961.74	2183.19	2416.14	2035.49	2822.57	1900.36	2368.02	1831.93
ENSG00000064989	32.4242	24.5515	20.5827	3.72943	7.98333	1.85406	23.7323	29.3232	9.62215	54.7455	15.1671	51.1803	25.9742	24.9202	29.4779	18.4432
ENSG00000064995	1184.97	2001.19	1193.89	1181.65	1148.3	1130.44	1502.7	1738.61	952.509	1077.49	990.542	877.808	1152.49	911.921	1026.68	2071.98
ENSG00000064999	1285.05	1795.75	917.22	900.439	762.891	750.458	2132.93	2312.76	978.712	1033.06	963.352	938.861	974.83	987.464	990.559	1939.89
ENSG00000065000	2991.11	3072.63	2131.09	1764.74	1907.24	1738.39	2435.97	2735.34	2231.16	2474.93	2371.42	2391.26	2154.94	2391.04	2276.49	3078.25
ENSG00000065029	570.331	698.955	958.478	758.831	684.347	588.6	548.412	719.891	458.948	481.932	428.152	444.771	460.104	434.321	456.964	716.164
ENSG00000065054	486.043	434.713	264.842	370.673	340.047	291.341	598.089	637.329	327.455	379.244	460.125	397.028	427.18	379.795	451.589	484.162
ENSG00000065057	270.654	274.648	199.794	208.99	237.89	176.566	222.887	226.085	131.124	250.374	175.901	225.923	170.699	240.021	164.313	281.618
ENSG00000065060	1808.9	3396.73	1547.53	1474.36	1476.22	1456.26	2864.44	3065.91	1448.82	1800.29	1375.92	1543.77	1218.29	1516.36	1523.15	3827.96
ENSG00000065135	5660.42	6217.03	2530.16	3106.28	2499.58	2878.26	4717.26	5355.41	4644.43	5759.78	4774.62	5009.52	5019.19	5028.08	5014.46	6048.05
ENSG00000065150	5561.32	6268.99	3609.57	3353.98	2910.51	3112.55	3423.86	3879.01	4485.46	5276.51	4187	4714.95	4178.35	5014.48	4799.99	6077.7
ENSG00000065154	5459.93	3288.12	1847.03	2137.55	1475.27	1717.79	2964.24	3707.78	7146.28	5798.64	7196.5	4863.13	8276.54	4688.24	7855.83	3035.08
ENSG00000065183	2154.49	5151.44	1245.08	1949.24	1296.76	1736.55	2761.65	3343.28	2645.42	2421.18	2581.08	1822.85	2947.15	1918.93	2439.45	4590.25
ENSG00000065243	2532.6	2509.56	1985.05	1582.26	1515.37	1350.9	1944.87	2301.03	2285.43	2795.96	2015.41	2239.37	2218.07	2296.7	2485.55	2130.16
ENSG00000065268	575.073	633.128	419.769	478.867	477.513	429.516	366.663	381.652	416.36	386.054	590.122	553.344	473.039	508.06	475.283	670.937
ENSG00000065308	3300.43	3000.48	1855.52	1524.97	1676.75	1719.88	1637.87	1710.5	2001.3	3109.98	1997.97	2619.21	1750.22	2700.31	2096.15	3509.79
ENSG00000065320	992.952	994.921	751.282	720.198	721.024	677.124	1015.5	1123.13	994.265	916.804	1156.83	803.176	997.141	814.464	1006.43	1078.52
ENSG00000065325	273.966	745.986	324.687	341.673	202.283	216.611	428.39	379.863	349.565	435.556	219.068	230.768	221.777	237.845	231.177	661.366
ENSG00000065328	2205.79	2128.59	1306.56	1178.91	1095.31	804.605	579.704	808.345	1089.01	2120.8	892.851	2128.54	1024.23	2117.79	1160.87	2613.16
ENSG00000065357	641.023	985.532	1638.33	1559.83	1135.07	1480.08	1421.85	1869.8	1353.72	598.765	1549.29	444.868	1898.33	423.474	1282.13	612.973
ENSG00000065361	269.096	113.442	100.263	138.05	200.748	87.0903	301.265	250.43	199.109	247.122	185.688	271.285	128.311	342.71	207.942	75.1725
ENSG00000065371	3.02258	0.794215	1.43663	1.42142	0	0	0	0	2.57405	1.83086	0	0	0.934254	2.47103	0	0
ENSG00000065413	279.331	289.732	169.185	237.006	128.631	78.709	279.958	316.237	289.367	494.659	353.526	554.894	239.738	339.493	217.941	235.033
ENSG00000065427	4467.27	7025.39	3781.31	4546.22	4119.01	4112.87	5563.32	6520.87	4347.46	4572.09	4525.53	3951.73	4841.06	3853.39	4601.23	7277.65
ENSG00000065457	816.883	699.858	375.797	395.618	389.848	468.477	456.81	421.25	690.587	841.37	704.761	756.21	690.908	782.425	745.204	665.866
ENSG00000065485	935.641	606.794	952.19	926.981	729.792	648.146	1088.89	1438.01	626.633	809.181	659.232	654.095	938.584	608.06	691.606	674.439
ENSG00000065491	667.613	1559.97	826.627	1025.93	830.682	843.312	1306.42	1458.53	593.065	649.906	663.653	613.157	609.413	503.61	636.709	1512.65
ENSG00000065518	1969.66	1379.19	1218.47	1602.26	1301.34	1118.94	1532.76	1686.52	1517.33	1922.95	1603.97	1629.64	1815.72	1705.87	1712.73	1537.65
ENSG00000065526	2293.08	3094.83	2344.4	2179.67	2662.36	1861.55	2775.81	2487.02	1534.21	2424.1	1651.53	1537.06	1471.04	1653.43	1641.75	3361.1
ENSG00000065534	929.494	686.631	647.729	642.445	328.616	301.836	449.598	721.307	663.45	1060.99	870.309	911.788	914.784	655.331	692.433	843.375
ENSG00000065548	2757.45	3822.35	2831.64	3065.5	2556.82	2732.15	2947.37	3486.98	3193.33	3042.14	3121.72	2368.61	3967.39	2575.19	3188.2	3489.24
ENSG00000065559	1238.13	1544.45	698.63	702.367	614.543	680.389	1163.74	1410.62	1108.84	1260.01	1036.18	1017.46	1217.57	1088.33	1224.37	1570.37
ENSG00000065600	321.884	421.527	304.443	450.538	346.665	352.637	624.496	852.931	310.293	290.961	372.474	260.737	409.882	261.523	330.012	424.528
ENSG00000065609	110.826	30.3205	28.4819	21.2728	27.2353	20.6705	95.8572	147.227	50.7149	78.8324	30.4221	37.0253	36.2149	30.811	62.7278	41.9515
ENSG00000065613	2449.7	2784.29	954.526	1121.56	826.606	954.653	2641.4	2463.26	3709.85	2814.69	3029.87	2330.99	4061.63	2273.23	3041.32	2349.06
ENSG00000065615	676.806	1024.9	305.666	433.387	275.637	302.535	681.984	980.686	544.412	708.237	731.585	572.095	706.257	661.137	683.318	892.554
ENSG00000065618	125.94	432.874	470.338	554.358	418.097	511.548	388.351	514.145	228.234	120.468	334.669	77.7918	336.938	85.5846	240.969	314.093
ENSG00000065621	693.964	225.584	205.047	189.233	223.468	241.726	330.303	456.322	406.428	641.517	450.474	616.977	578.605	619.285	660.375	300.983
ENSG00000065665	529.142	513.771	992.988	887.512	933.539	762.132	768.625	897.264	310.837	533.536	351.581	382.354	412.496	452.83	431.332	656.806
ENSG00000065675	431.092	345.543	241.052	232.399	185.177	193.172	304.606	281.356	239.114	401.314	261.788	371.702	283.341	401.466	316.854	394.223
ENSG00000065717	901.436	366.196	350.81	376.358	467.108	363.319	1309.84	1758.79	510.91	632.337	602.492	658.055	729.335	606.532	645.943	490.036
ENSG00000065802	1305.57	1573.84	825.323	921.468	868.513	871.23	1556.02	1556.11	1404.12	1254.03	1605.44	1015.65	1780.31	1016.69	1460.11	1325.37
ENSG00000065809	846.662	1762.71	444.792	528.19	504.996	612.969	976.046	1237.57	1060.75	1147.26	1113.16	937.551	1385.54	899.516	1055.91	1392.23
ENSG00000065833	750.696	1077.09	771.316	737.247	641.264	558.25	874.177	953.754	487.849	759.251	486.948	725.976	529.722	709.31	611.839	1208.29
ENSG00000065882	4701.78	3381.95	2890.76	2769.22	2762.39	2600.06	4297.71	4785.74	2723.86	4094.51	3032.82	3556.34	3395.37	4100.83	3669.31	3827.03
ENSG00000065883	2336.19	1899.17	2056.64	1501.91	1630.06	1450.02	2008.52	2112.95	2006.26	2323.96	1753	1906.03	2562.27	2033.75	1936.81	1920.49
ENSG00000065911	5133.1	7206.73	3100.34	3713.54	3857.57	4250.82	4741.97	5724.24	6408.61	5600.59	7032.7	5073.24	6796.14	4671.14	6675.21	6509.63
ENSG00000065923	1114.6	1284.1	897.645	1052.82	836.837	702.518	2015.2	1851.57	1133.93	873.851	1006.53	791.843	1081.31	764.083	985.209	1473.39
ENSG00000065970	2520.49	1978.61	807.647	808.985	738.182	718.574	2033.82	2104.27	1990.13	2198.72	1903.15	1917.58	2009.35	2001.75	2196.89	2118.27
ENSG00000065978	39860.5	45299.7	17366.2	21575.5	19882.8	21068.6	35305.9	39570.1	37939.7	40402.3	41044.4	33168.8	56224.2	34920.1	42326.5	43631.3
ENSG00000065989	691.175	679.888	406.533	424.823	371.488	273.707	803.595	844.086	476.476	685.852	550.931	526.812	488.968	576.26	539.302	749.732
ENSG00000066027	738.238	999.216	364.249	412.829	329.639	376.347	1132.38	1281.16	671.761	786.344	630.889	697.378	771.082	606.55	724.961	1027.56
ENSG00000066032	11.4421	12.6655	8.30195	12.3643	4.43641	4.2694	52.3512	46.0653	8.70728	6.72622	8.65263	3.09738	9.38773	25.6435	15.7735	26.5874
ENSG00000066044	2721.24	2534.81	1197.28	1522.91	1280.16	1280.08	1811.73	2023.84	1959.15	2717.14	2088.93	2161.09	1804.94	2164.15	2142.52	2923.47
ENSG00000066056	23.6873	3.96839	13.224	11.0591	14.6313	2.8307	17.2857	32.2603	43.8047	8.36833	23.9402	15.1452	17.9259	14.2688	22.1203	9.9238
ENSG00000066084	2194.34	1942.26	840.649	709.745	751.49	733.079	1567.91	1662.07	1497.45	2047	1395.76	1618.84	1360.19	1711.28	1590.04	2082.8
ENSG00000066117	2730.57	2454.62	1337.39	1353.69	1254.27	1283.79	1627.68	1681.21	2742.03	2769.11	2639.79	2349.36	3085.36	2619.16	3027.5	2340.8
ENSG00000066135	3124.27	2719.26	1474.25	1482.97	1506.6	1490.73	2720.62	2922.6	2839.1	2996.45	2809.38	2540.62	2801.8	2517.47	2926.94	2667.72
ENSG00000066136	2116.68	2070.99	1475.26	1664.33	1346.01	1349.34	1072.7	1149.14	1871.78	1822.73	1838.2	1780.42	1720.25	1687.5	1982.92	2151.41
ENSG00000066185	1.67686	11.1603	15.0843	12.4685	1.65235	4.16302	15.8485	11.2298	3.29964	0.817144	2.52238	0	1.60335	2.17577	4.16564	0
ENSG00000066230	114.478	69.9648	27.767	31.4381	44.6133	34.2702	98.4098	114.708	107.927	112.715	111.385	118.126	130.837	102.803	107.1	64.26
ENSG00000066248	217.195	83.9372	44.6215	45.5227	77.078	26.0964	352.832	389.81	114.576	176.13	110.93	167.471	140.665	182.077	185.535	115.746
ENSG00000066279	4412.02	2490.21	3502.77	2897.4	3468.75	3420.01	1302.94	1209.03	2747.49	4296.39	2555.82	3245.6	2771.34	3545.98	3036.91	2779.1
ENSG00000066294	5.43195	5.33815	15.0406	16.1759	7.30606	4.98416	12.6839	8.47166	11.1169	13.9614	13.1788	7.85642	13.4832	10.3516	9.94486	7.1949
ENSG00000066322	2050.54	2698.48	1668.58	2067.91	1649.33	1858.78	1261.14	1534.37	2105.3	2033.14	2332.96	1724.33	2074.34	1686.15	2125.81	2542.51
ENSG00000066336	6.6008	1.34392	1.6245	2.67865	1.62481	0	1.59717	2.56564	2.43952	0	6.6142	1.35297	3.15398	3.33148	0.666357	3.20999
ENSG00000066379	308.942	319.177	225.73	271.721	236.481	214.565	224.15	282.354	330.377	245.466	361.704	249.927	310.11	219.314	347.014	299.284
ENSG00000066382	66.9905	23.6273	17.2197	32.449	40.1066	53.7539	102.041	127.937	58.7229	82.0515	55.1766	93.3733	64.4188	63.7807	51.5993	30.7406
ENSG00000066405	0	0	0	0	0.867713	0	0	0	1.23022	0	0	0	0	2.02464	0	0.99769
ENSG00000066422	1275.53	1154.63	1062.19	845.989	826.611	900.065	1019.72	1119.12	1412.84	1136.61	1385.99	1019.27	1525.71	1044.8	1450.83	994.847
ENSG00000066427	597.938	455.324	291.753	350.471	442.525	395.479	779.802	882.671	628.798	588.104	571.293	495.808	727.452	556.101	576.946	547.777
ENSG00000066455	976.565	696.286	364.827	410.731	410.714	472.185	1276.64	1628.12	897.869	979.973	891.336	817.34	1094.27	867.141	876.493	631.82
ENSG00000066468	870.944	324.343	279.289	244.487	276.592	250.602	436.834	532.518	690.735	913.603	635.227	736.493	730.043	686.712	774.134	413.374
ENSG00000066557	923.898	853.79	537.235	668.388	573.196	564.285	615.78	782.783	648.307	946.289	678.72	868.271	753.077	829.943	720.285	886.401
ENSG00000066583	971.312	932.226	439.83	561.945	459.155	455.6	677.926	777.36	901.589	906.984	986.149	800.703	1011.64	825.634	1001.55	880.642
ENSG00000066629	168.214	150.906	91.3997	78.5644	90.7309	58.0726	328.182	419.187	275.547	192.822	105.2	183.045	229.563	135.104	169.824	167.327
ENSG00000066651	347.26	419.636	507.503	473.569	410.268	379.66	448.588	572.378	295.444	361.989	297.287	322.522	423.774	321.732	343.272	400.041
ENSG00000066654	1799.15	1193.01	721.741	688.884	616.901	693.238	1107.66	1063.55	1937.8	1760.8	1720.15	1490.96	1986.09	1486.84	1901.78	1089.68
ENSG00000066697	2396.19	3795.95	1832.21	1988.28	1525.24	1775.06	3074.37	3726.06	2386.84	2645.73	2303.78	2249.85	3108.68	2213.79	2213.35	3494.64
ENSG00000066735	281.226	157.234	103.708	83.8898	139.102	102.275	199.144	214.107	114.026	206.581	194.775	255.489	137.352	231.566	149.225	168.472
ENSG00000066739	700.226	335.855	140.58	303.147	127.661	334.284	375.613	436.346	536.795	607.811	430.427	481.589	506.327	496.415	656.614	441.804
ENSG00000066777	2122.48	2283.1	2570.22	2119.14	1751.66	1807.3	2109.73	2160.76	1706.18	1869.35	1777	1799.24	1922.53	1868.18	1801.2	2496.07
ENSG00000066813	3.96234	1.61606	10.8803	7.6243	0	3.20124	7.79076	1.06368	3.17655	0	0	5.66555	0.354546	0	0	1.94959
ENSG00000066827	348.429	254.334	202.597	156.647	183.983	153.347	273.631	293.34	146.644	363.763	175.991	272.538	209.635	234.607	237.601	282.752
ENSG00000066855	970.043	1069.06	554.16	634.157	629.264	506.65	1010.76	1204.73	764.251	862.119	713.959	771.298	865.305	790.78	924.496	1182.37
ENSG00000066923	97.662	71.3427	127.508	75.0654	98.1518	71.0834	51.1563	59.9677	91.6856	76.0853	49.4713	46.8847	58.4531	66.1275	86.645	63.4202
ENSG00000066926	789.635	695.989	219.03	337.912	217.724	180.924	518.87	683.072	530.555	840.364	706.441	661.749	662.379	610.794	714.536	591.973
ENSG00000066933	1603.11	932.286	838.17	602.443	612.153	568.818	930.328	798.675	1184.87	1485.09	1144.97	1164.19	1156.42	1292.2	989.878	921.511
ENSG00000067048	0	0	0	0	0	0	0	0	0	0	0	0	0	0	0	1.00522
ENSG00000067057	1873.95	1838.18	1236.66	1227.24	1377.94	1303.2	2337.4	2574.23	1803.41	2030.18	1792.18	1582.92	1779.47	1536.73	1407.89	1940.58
ENSG00000067064	947.608	926.869	488.682	418.504	457.176	384.835	442.241	483.078	1163.44	951.686	1105.98	821.898	1293.27	824.968	1148.15	863.507
ENSG00000067066	1032.35	1328.82	853.536	780.224	542.244	645.5	1223.82	1486.86	1079.82	1028.88	1166.24	967.077	1529.91	902.89	1198.4	1096.22
ENSG00000067082	1774.69	1473.72	553.627	550.406	487.84	489.438	1928.32	2210.81	1310.95	1410.53	1333.44	1421.18	1187.62	1338.73	1278	1249.63
ENSG00000067113	372.154	276.791	316.261	279.714	254.527	230.608	388.874	432.246	274.515	334.863	288.007	367.15	370.294	300.416	299.465	272.766
ENSG00000067141	3452.63	1408.84	1048.28	1006.98	1074.96	925.333	2132.1	2270.69	2134.39	3329.06	1993.62	2707.14	2940.34	2889.79	2478.34	1631.06
ENSG00000067167	4882.23	6948.64	2542.77	3101.71	2866.71	3623.3	5990.1	7180.81	5139.72	5795.59	4955.91	4765.88	7069.61	4607	5390.16	5958.74
ENSG00000067177	630.598	680.459	381.782	394.26	380.666	302.395	944.389	1023.12	512.576	611.38	499.915	500.4	496.895	518.872	524.255	739.745
ENSG00000067182	2743.62	2369.8	1491.27	1363.3	1473.53	1314.67	3168.37	3687.32	2599.2	2666.63	2538.53	2461.43	2938.92	2378.3	2568.9	2402.31
ENSG00000067191	550.715	295.709	593.292	558.98	496.392	468.531	342.57	390.737	460.636	532.146	431.59	441.664	395.058	493.113	425.162	432.058
ENSG00000067208	743.545	853.639	270.755	342.76	258.673	376.9	1056.96	989.599	692.079	706.278	696.716	632.268	927.357	636.427	779.305	774.322
ENSG00000067221	271.275	243.675	187.373	201.603	189.168	159.399	90.3564	105.529	154.383	234.32	170.909	227.616	137.381	170.966	155.793	222.145
ENSG00000067225	82589.1	87598.6	40982.2	50512.1	37801	35467	64747.9	74831.6	70037.1	87949.3	69408.3	68294.4	84522.1	69829.9	74137.3	91491.9
ENSG00000067248	1907.69	1546.41	861.785	898.136	857.944	871.333	1027.29	1057.16	1551.74	1979.24	1599.86	1635.71	1656.27	1747.24	1678.87	1554.41
ENSG00000067334	1840.26	2965.55	2325.37	2409.98	2164.4	2341.79	1512.14	1729.32	2350.05	2020.15	2480.85	1551.49	2586.62	1653.91	2440.33	2353.45
ENSG00000067365	690.941	426.481	452.919	406.418	507.661	455.879	679.024	770.785	566.745	607.95	540.1	550.719	570.523	484.752	645.468	520.282
ENSG00000067369	3545.31	1975.32	1993.08	1868.75	1835.67	1565.71	2137.14	2146.62	2554.96	3570.78	2386.3	2727.12	2599.58	2918.06	2897.01	2176.96
ENSG00000067445	3210.3	1668.27	2131.92	1714.76	1964.23	1507.54	2375.59	3012.01	2177.53	2702.97	2239.22	2398.48	2768.98	2487.82	2392.42	1818.32
ENSG00000067533	575.979	1033.03	420.612	528.711	443.618	485.262	413.972	547.647	727.768	551.926	632.115	462.584	890.583	475.741	645.169	786.734
ENSG00000067560	12859.1	13661.1	6428.31	8066.5	6098.71	6081.09	10781.1	12446.5	10440.4	12770.5	10770.1	10907.7	10783.5	11537.4	12093.2	14088.9
ENSG00000067596	2244.58	1442.12	947.108	1225.77	946.631	922.954	1291.87	1290.17	1926.41	2100.14	1894.4	1831.69	1811.9	1793.59	2071.64	1646.39
ENSG00000067601	83.932	63.9703	39.0447	36.556	33.9533	41.2591	45.7409	67.1919	66.0655	78.2855	78.7327	65.3276	73.2992	77.3627	79.4087	67.9358
ENSG00000067606	583.836	438.99	302.068	337.077	384.615	385.241	984.223	1089.79	522.945	556.338	567.893	466.202	622.223	489.944	694.219	449.506
ENSG00000067646	0	0	0	0	0	0	0	0	0	0	1.00397	0	0	0	0	0
ENSG00000067704	4423.72	4739.22	2694.46	2957.43	2207.15	2416.75	3474.55	4116.12	3737.95	4247.56	3822.21	3820.65	3842.96	4219.45	4184.98	4552.33
ENSG00000067715	200.59	74.8503	30.1216	29.6969	22.2249	24.1303	142.317	87.5057	120.474	114.253	153.478	122.343	123.308	152.289	159.377	78.6008
ENSG00000067798	875.841	1440.53	1418.5	1282.23	1011.97	965.135	1136.17	1025.45	855.567	813.902	987.807	670.827	899.221	814.191	848.8	1072.98
ENSG00000067829	662.209	1087.41	856.603	1055.31	890.57	789.382	1184.87	1209.07	623.659	574.433	672.578	522.948	633.666	537.629	678.675	993.158
ENSG00000067836	830.29	258.573	274.497	259.057	388.791	264.375	1031.17	942.922	269.443	894.323	398.73	717.091	620.07	711.104	376.205	380.702
ENSG00000067840	1082.45	252.007	279.549	238.645	309.057	239.909	788.673	708.157	576.314	869.156	606.027	816.035	919.217	770.738	738.469	284.226
ENSG00000067842	29.3334	17.192	12.8832	26.2312	63.9712	29.0724	74.1043	138.466	13.2606	27.7089	11.5214	27.604	5.58828	30.6866	8.01225	26.3437
ENSG00000067900	3479.32	2524.46	1542.7	1176.15	1373.77	1422.26	2508.94	2761.18	2649.79	3535.98	2413.7	2686.19	2738.86	2937.9	2666.06	2495.52
ENSG00000067955	2008.6	1981.18	863.912	842.4	828.528	965.819	1648.6	1901.1	1931.45	1731.45	2100.27	1634.61	2454.41	1481.87	1993.78	1765.11
ENSG00000067992	418.171	394.905	245.298	248.211	213.666	189.528	346.309	481.717	212.902	359.957	246.062	396.875	222.32	360.299	294.23	403.023
ENSG00000068001	1733.7	1469.56	1278.69	1570.37	1327.8	1131.21	1587.57	1864.1	1663.65	1520.74	1999.8	1432.35	1694.98	1382.23	1813.85	1549.47
ENSG00000068024	121.499	96.3002	36.9934	40.468	74.4254	45.7013	125.417	72.2776	127.212	79.8716	80.5323	107.269	73.4568	151.747	71.9884	75.1197
ENSG00000068028	354.037	621.234	553.607	518.828	553.653	521.943	325.799	341.446	437.956	311.117	459.644	283.888	380.101	247.082	416.785	664.013
ENSG00000068078	100.403	70.723	64.5241	73.3885	102.903	45.4494	214.707	241.117	71.8286	55.6231	156.984	70.29	160.684	32.0709	73.8999	71.3079
ENSG00000068079	2.44463	3.50868	11.4173	2.90308	3.50982	5.00705	2.19509	0	8.59151	3.49416	2.42367	4.09669	5.55076	1.21493	0.490416	4.45836
ENSG00000068097	1336.5	1018.68	772.114	743.068	1088.19	1236.08	1122.74	1292.7	1584.13	1403.22	1502.54	1198.23	1455.33	1253.81	1497.13	1008.42
ENSG00000068120	2585.09	2091.32	2018.31	1919.74	1670.41	1482.77	1438.47	1437.3	2326.33	2257.3	2422.88	2131.12	2115	2076.65	2412.91	2102.6
ENSG00000068137	621.757	334.833	805.28	808.961	709.287	509.944	865.264	857.383	260.008	490.25	406.818	545.695	319.994	583.808	438.658	589.669
ENSG00000068305	1600.75	1426.47	1069.77	946.896	845.967	765.953	1438.98	1690.35	1570.76	1686.73	1407.58	1250.23	1440.78	1198.64	1509.91	1446.91
ENSG00000068308	1912.49	1659.19	961.979	1037.18	996.077	990.55	2422.55	2506.36	1706.67	1844.6	1702.08	1491.03	2131.1	1551.29	1792.32	1766.54
ENSG00000068323	2839.6	4353.27	3152.14	3009.45	2681.46	2887.68	3522.62	3705.7	2766.06	2612.6	2774.09	2392.29	2673.15	2168.3	2680.65	4107.6
ENSG00000068354	685.829	755.137	492.355	477.413	387.811	375.568	724.594	820.013	612.321	604.356	715.651	589.464	696.253	547.65	679.931	755.082
ENSG00000068366	1636.81	2367.32	706.938	898.359	615.778	789.509	1501.64	2420.5	2394.8	1679.3	2380.16	1579.34	2511.09	1563.55	2231.09	1798.23
ENSG00000068383	678.465	599.476	285.122	274.48	293.565	250.365	338.996	323.287	488.548	600.323	578.665	546.129	446.52	511.143	482.096	625.641
ENSG00000068394	804.963	967.81	581.57	652.75	500.209	531.856	798.186	880.574	738.624	752.295	866.509	700.362	912.758	663.326	797.918	863.412
ENSG00000068400	1742.87	1608.11	1489.36	1191.8	1242.84	1054.6	1642.36	1731.01	1734.85	1632.39	1375.25	1287.75	1569.87	1266.09	1523.69	1407.04
ENSG00000068438	1951.27	2496.04	1825.61	1826.85	1669.57	1589.3	1473.55	1665.63	1709.83	1893.62	1809.47	1673.6	1812.07	1572.25	1782.83	2510.47
ENSG00000068489	9290.57	4135.73	1499.19	1523.38	2111.91	2235.26	3890.17	3989.34	6924.71	9057.55	6672.18	7678.54	7475.32	8342.71	8066.55	4644.1
ENSG00000068615	107.091	91.2099	70.1219	61.0262	58.8646	32.3833	55.5088	109.191	46.722	63.2613	55.7826	65.4774	62.5418	88.6214	60.6003	115.592
ENSG00000068650	3441.29	3225.45	1332.93	1294.1	1128.51	1316.96	3335.71	2996.93	2470.4	3087.5	2360.94	2270.15	2151.42	2574.69	2472.89	3414.36
ENSG00000068654	3268.21	4577.9	1720.84	1755.76	1613.17	1576.51	2413.3	1813.06	2820.32	3066.39	2672.46	2280.97	2142.78	2454.94	2529.76	4775.84
ENSG00000068697	4749.83	4696.81	4128.83	4719.29	3398.63	3722.56	5245.78	6579.48	3851.28	4434.89	4213.14	4151.86	5101.84	3861.93	4675.21	4935.89
ENSG00000068724	664.494	514.038	601.457	524.113	567.334	386.263	606.152	634.506	376.403	600.218	384.592	562.662	387.775	469.817	482.675	635.666
ENSG00000068745	2091.31	1604.28	2048.32	1953.84	2042.07	1964.87	2514.78	2807.8	2563.89	1912.13	2679.46	1696.3	3076.3	1676.02	2454.12	1458.88
ENSG00000068781	0	0	1.25399	18.6625	0	0	3.57004	9.93987	4.65652	0	7.93268	2.12774	0	0	0	3.04202
ENSG00000068784	1048.57	722.086	508.738	501.736	442.823	385.936	603.767	639.208	651.072	1123.55	676.431	879.09	725.226	982.254	715.583	740.775
ENSG00000068796	3636.87	2195.12	1074.25	1260.84	1080.87	1110.47	1880.13	2391.91	2593.37	3421.51	2163.6	3118.74	3171.12	3030.98	2744.72	2271.46
ENSG00000068831	35.3423	7.36305	19.975	41.4185	35.3918	25.1381	93.8469	146.637	4.15816	11.354	17.7999	12.9871	15.8041	31.1411	38.5731	8.97001
ENSG00000068878	4074.4	5515.28	5830.87	5631.28	4993.21	5038.55	4601.3	4853.24	3733.81	4538.16	4427.79	3529.18	3533.41	3606.44	4488.78	5116.2
ENSG00000068885	1332.89	539.974	1186.49	1002.29	1075.39	834.522	833.581	952.488	807.734	1346.73	839.125	1176.1	1068.09	1218.84	1140.59	590.568
ENSG00000068903	434.677	316.65	257.79	282.703	282.078	235.603	550.794	561.303	302.288	443.047	384.205	370.249	397.696	388.524	364.305	346.384
ENSG00000068912	2566.09	2285.11	1520.01	1787.07	1407.59	1447.19	3106.89	3913.4	2534.86	2446.86	2701.52	2121.64	3301.38	2139.97	2744.32	1950.49
ENSG00000068971	264.52	404.041	366.111	341.451	375.277	327.923	500.925	610.106	380.069	201.862	371.995	189.858	250.68	213.509	352.596	348.61
ENSG00000068976	50.2452	79.8594	85.4985	83.6165	69.3462	64.7656	18.1197	18.9181	82.215	46.3241	75.2678	32.1452	60.7231	37.2604	82.733	32.6391
ENSG00000068985	1.00253	21.1446	18.7512	34.0787	24.6774	20.9452	61.129	74.3783	0	0	2.00912	2.03606	0	2.02401	0	15.5992
ENSG00000069011	289.555	229.479	134.077	116.611	104.914	100.78	190.007	165.967	145.083	185.856	228.029	195.675	163.342	205.263	208.177	249.314
ENSG00000069018	0	0	0	0	0	0	0	0.960699	0	0	0	0	0	0	0	0
ENSG00000069020	978.32	754.152	341.628	286.057	174.184	246.362	798.062	798.293	1673.25	785.83	1320.51	830.782	1331.04	613.789	1470.52	449.404
ENSG00000069122	25.582	113.617	27.4326	30.6283	14.1721	34.9749	68.2376	67.4086	34.4509	5.549	61.0888	10.7319	38.2334	4.22159	25.4703	52.1199
ENSG00000069188	1415.65	807.64	530.924	544.881	475.028	428.26	2021.37	1980.05	1335.5	1089.84	1398.06	1100.65	1325.97	943.552	1264.84	933.047
ENSG00000069206	0	0	0	0	0	0	0	0	0	0	0	0	1.46423	0.821438	0.814587	0
ENSG00000069248	1660.12	1414.61	1667.28	1475.36	1522.56	1391.11	1230.96	1636.33	1058.24	1523.23	998.577	1217.35	1270.41	1144.46	1295.47	1366.04
ENSG00000069275	16734.5	11662.9	6874.61	7461.99	6857.38	6373.58	9439.16	11638.8	11544.8	16339.6	11024.6	14272.7	14224	15602.2	14752.6	14833.3
ENSG00000069329	4167.73	4284.75	1937.24	2330.67	1798.93	1728.62	3186.16	3700.52	2749.63	3817.72	2765.98	3133.87	3535.21	3261.02	3747.94	4619.02
ENSG00000069345	1622.75	2716.89	1332.56	1532.28	1278.82	1474.17	2312.15	2870.27	2050.39	1645.87	2164.33	1554.02	2457.47	1429	2054.15	2307.29
ENSG00000069399	153.482	211.03	312.736	368.078	329.922	285.08	633.023	567.551	212.038	143.441	263.629	200.409	250.115	120.852	256.695	231.669
ENSG00000069424	759.001	849.904	620.959	481.623	283.274	320.043	664.221	651.815	675.937	619.549	542.882	597.791	407.371	614.658	592.106	733.468
ENSG00000069431	323.825	290.387	489.749	411.964	365.394	333.594	158.619	179.571	291.259	406.606	275.501	265.051	296.087	354.622	304.147	265.252
ENSG00000069482	2.00813	1.00783	0	2.00709	0.988804	0.998477	0	0.956364	0.990547	0	1.00631	0	1.90878	0	1.99423	5.88704
ENSG00000069493	225.181	103.715	707.99	538.529	575.149	423.998	181.173	241.486	193.093	180.294	181.91	198.197	154.479	152.435	119.406	116.579
ENSG00000069509	508.048	722.363	452.342	508.394	382.796	366.731	564.16	661.297	505.017	544.247	602.166	437.44	692.491	477.712	607.017	665.039
ENSG00000069535	139.488	171.578	75.6862	64.6428	66.7744	66.2579	320.945	361.724	89.1201	115.775	126.918	109.311	116.771	115.23	123.78	153.077
ENSG00000069667	512.562	377.759	305.617	228.925	306.175	348.548	721.012	898.382	483.758	491.112	504.038	495.249	529.775	412.022	466.342	301.962
ENSG00000069696	5.47551	6.61868	30.4184	13.024	18.9954	17.701	2.4978	6.15396	2.57555	6.54031	4.8238	4.91263	6.52901	10.6181	0.883234	7.69863
ENSG00000069702	311.382	332.748	243.798	171.432	121.68	89.3296	323.075	460.547	165.567	280.037	185.456	231.057	249.615	249.025	191.937	439.789
ENSG00000069764	0	0	0	2.17139	4.17569	1.40739	0	0	0	0	0	2.92982	0	0	0	0
ENSG00000069812	16.344	13.902	14.8427	29.8252	8.1737	19.3438	4.11087	14.0886	13.6044	13.9132	18.4349	8.7989	20.9415	15.5124	7.59851	16.0988
ENSG00000069849	1759.58	1658.85	2557.54	2322.68	2024.37	2030.68	1666.3	1649.97	1546.48	1831.06	1648.33	1577.36	1821.61	1547.21	1702.84	1584.49
ENSG00000069869	2863.09	1966.81	2684.13	2032.84	2541.31	2300.29	1507.32	1651.89	2079.73	3289.4	1882.04	2179.28	2497.95	2656	2007.47	2133.13
ENSG00000069943	206.514	197.015	396.092	358.982	411.386	345.25	228.082	194.595	112.334	177.444	124.177	167.881	120.423	173.956	156.605	221.04
ENSG00000069956	4451.54	3692.22	1118.48	1440.08	1108.36	1266.84	2894.73	3339.32	4677.57	4494.33	4574.6	3714.13	5154.06	3937.03	5030.48	3222.81
ENSG00000069966	1238.8	742.172	520.227	566.726	429.229	413.234	708.737	776.838	780.183	1196.73	898.725	1077.83	957.151	918.203	902.177	788.417
ENSG00000069974	593.317	460.334	336.358	316.86	214.223	201.842	373.761	517.418	376.743	639.079	364.064	511.186	525.573	545.882	373.443	510.967
ENSG00000069998	787.647	762.516	627.988	574.42	558.264	440.625	427.951	483.462	607.681	777.727	690.789	661.524	582.683	621.796	662.044	869.298
ENSG00000070010	4224.35	4300.63	3452.6	4209.36	3026.3	2711.55	3147.19	4059.66	2937.72	4251.49	3093.23	3235.56	3853.72	3548.24	3371.01	5085.62
ENSG00000070018	4709.61	3173.16	3150.6	2436.05	2972.39	2479.41	3269.03	3544.29	3245.83	4847.1	3046.92	3840.25	3302.78	4125.96	3660.14	4570.55
ENSG00000070019	0	0	0.987168	0	0.986021	0.992757	1.94168	0	0	0.993122	0	1.00611	0	0	0	0
ENSG00000070031	0.999942	0	0	0	0.984082	0.995812	0	0	0	0	0	0	0	0	0	0
ENSG00000070047	1058.73	1180.08	808.446	762.452	765.647	726.893	726.352	695.906	848.338	835.803	960.011	798.629	909.056	836.752	940.486	1149.84
ENSG00000070061	1003.01	2008.13	1553.28	1376.93	1788.54	1624.14	1716.49	1804.27	995.345	908.935	823.89	761.475	692.021	954.874	891.814	2283.37
ENSG00000070081	3290.8	3210.12	4999.57	4979.74	5411.81	4400.88	5672.85	6521.73	2519.48	3466.67	2476.07	2901.21	3633.31	2961.98	2841.72	3149.67
ENSG00000070087	8168.45	5815.54	3033.51	3248.62	2774.83	2541.93	4953.92	5920.44	5069.51	8013.52	4775.63	6835.57	6261.54	7381.23	6205.07	6094.14
ENSG00000070159	744.525	700.773	1267.97	861.38	813.777	1158.56	842.412	856.783	668.25	667.028	721.893	596.98	671.366	574.869	920.277	667.836
ENSG00000070182	1158.18	1338.7	763.623	815.074	434.227	444.726	927.75	898.73	848.895	1124.53	953.391	853.005	739.112	942.415	887.702	1308.17
ENSG00000070190	9.79029	14.285	9.09853	9.75593	6.14163	5.64074	10.6062	16.2642	22.6117	20.9141	15.2042	12.7019	11.5217	20.5755	10.6726	13.2304
ENSG00000070193	5.41278	0	0	0	0	0	6.51132	10.83	2.19957	6.8953	2.24391	8.2955	5.11226	5.96031	9.2101	1.5365
ENSG00000070214	3803.34	1962.73	867.646	828.892	549.386	554.357	2225.8	2633.18	1990.64	3358.45	1849.16	3102.3	2417.89	3109.23	2477.57	2370.96
ENSG00000070269	606.695	363.882	670.708	570.977	542.715	525.181	492.942	607.088	344.1	528.31	361.236	427.15	476.429	470.946	378.716	366.955
ENSG00000070366	1301.35	1267.01	829.387	1036.41	956.704	836.847	744.108	770.634	664.41	1587.91	904.002	941.072	669.612	949.447	769.815	1109
ENSG00000070367	5943.29	5933.91	1415.61	1655.17	1378.54	1672.05	4393.82	5014.1	4855.17	6473.07	4541.28	5400.61	5463.3	5320.4	5419.1	5464.31
ENSG00000070371	1323.05	887.296	655.545	529.191	584.054	364.291	880.706	810.28	589.733	1212.61	746.041	1170.22	690.26	948.722	771.697	1099.62
ENSG00000070388	3.39348	3.00981	6.11903	1.05341	0.979603	0.994813	1.48591	0.976644	0	0	3.39721	5.22158	1.88264	1.98943	0.99585	1.70833
ENSG00000070404	2071.27	2318.22	1738.17	1865.09	2012.62	1938.46	1481.92	1507.4	2012.86	2124.51	2440.51	1744.87	1984.15	1821.17	2073.65	2523.15
ENSG00000070413	2873.45	1361.66	919.262	950.594	854.388	695.088	871.512	817.198	1913.84	2539.41	1818.22	2031.75	1379.13	2028.51	1853.97	1672.81
ENSG00000070423	432.11	573.343	320.14	361.308	259.938	326.497	285.499	328.079	302.3	345.103	468.495	347.851	345.366	295.628	351.79	568.8
ENSG00000070444	833.014	520.886	322.413	249.686	298.636	226.266	674.485	758.4	456.683	537.81	507.495	521.559	443.188	572.616	492.983	578.199
ENSG00000070476	684.064	433.421	611.211	484.005	450.227	390.402	409.567	411.195	574.431	602.483	585.088	509.478	508.528	478.424	574.132	400.268
ENSG00000070495	694.955	951.774	830.859	788.869	845.351	737.51	861.089	1084.36	889.434	709.024	1009.35	585.961	952.61	615.555	919.914	871.096
ENSG00000070501	564.23	459.087	364.529	357.09	361.655	365.151	497.631	609.58	427.032	459.618	492.346	491.157	509.144	442.277	559.905	430.502
ENSG00000070526	3.34289	2.77955	0.520885	0	0	0	0	0	0	0	0	0	0	0.5296	0	0
ENSG00000070540	955.736	598.425	331.727	269.285	344.799	296.561	1237.23	1475.91	892.891	818.318	953.67	851.553	1058.12	714.838	898.135	576.105
ENSG00000070601	37.9434	54.6528	76.228	71.9575	57.0971	44.355	32.9583	37.3482	34.8964	48.4736	32.2605	40.1615	32.4095	36.0756	32.1898	33.4259
ENSG00000070610	1854.12	2128.27	3274.4	2276.83	2825.17	2184.23	2016	2042.18	1897.78	1698.53	1813.58	1326.12	1860.94	1434.42	1943.47	1860.32
ENSG00000070614	11285.6	7866.08	2933.01	3073.9	2680.1	2866.13	3638.87	3316.05	10774.6	10440.4	10534.3	9193.61	7853.33	9054.19	9468.91	8729.47
ENSG00000070669	1887.85	2765.93	2419.03	2631.21	3877.03	3664.99	1843.28	2062.09	2037.4	2074.48	2454.71	1906.2	2138.7	1777.52	2128.49	2784.97
ENSG00000070718	1098.73	863.912	583.214	467.652	396.387	375.767	678.507	757.27	999.482	1225.49	894.108	950.043	1033.8	806.381	749.653	793.758
ENSG00000070729	5.53474	31.8906	28.0846	14.3356	9.47445	7.42477	10.5317	14.5882	11.4532	3.60728	7.66915	7.73811	6.50405	6.14403	13.549	8.00186
ENSG00000070731	0	0	0	1.18327	0	0	3.38803	5.96282	6.01909	2.48805	0	0	3.46509	0	2.63961	0
ENSG00000070748	6.44002	13.9844	3.43763	4.09654	1.71799	2.53928	32.1088	48.1445	3.70897	8.20339	11.2038	5.70035	5.05903	0	6.24562	7.21004
ENSG00000070756	40103.8	43783.6	28335.1	27498.5	24852.2	23391.3	38163.8	42726.5	34600.7	40818.9	32156.7	32372.3	38542.6	35119.6	36697.5	47909.1
ENSG00000070759	188.24	186.674	142.103	154.693	141.927	98.6633	321.156	355.23	126.607	142.654	184.933	166.101	168.164	147.058	161.65	173.077
ENSG00000070761	1193.8	1250.39	674.638	849.524	852.764	785.108	1101.69	1435.49	1784.58	1204.81	1741.27	1088.91	2357.24	1004.78	1671.72	1160.25
ENSG00000070770	2770.55	3228.94	1334.23	1468.12	1287.86	1529.95	3101.47	3685.3	3083.5	2958.79	3379.41	2356.34	3275.44	2410.61	3291.02	3449.19
ENSG00000070778	2743.68	1020.11	810.049	654.821	438.442	693.105	690.659	654.088	1768.94	2144.71	1832.31	2037.45	1975.4	2024.25	1761.42	1059.43
ENSG00000070785	603.131	1101.08	658.417	795.108	707.694	698.763	850.261	1068.47	583.231	608.351	653.311	482.138	680.219	503.215	600.716	1098.59
ENSG00000070808	9.29361	10.9322	15.7612	22.8875	33.5954	11.5616	16.6823	14.4238	5.27401	5.68213	22.2951	8.35292	21.9583	7.30716	10.5291	16.6314
ENSG00000070814	4278.99	4186.73	4073.94	3201.86	4035.63	3676.44	2761.55	2538.07	3408.97	4066.53	3170.87	3585.34	3351.14	3651.77	3211.48	5601.18
ENSG00000070831	8761.31	8545.52	3133.74	3818.89	3689.04	4176.15	7070.46	8739.76	7492.67	9267.4	7944.21	8358.29	9051.12	7475.4	8350.49	8154.6
ENSG00000070882	2416.88	2726.22	3433.42	3410.68	3024.12	3124.12	2693.26	2566.88	2952.55	2483.16	3110.77	1813.58	3338.24	2010.29	3291.84	2508.75
ENSG00000070886	18.2388	8.56937	14.9262	13.9376	16.9291	18.251	42.6591	38.7421	23.0684	19.0184	16.906	13.6196	24.2142	21.1487	19.9925	9.85521
ENSG00000070915	13.4157	0.678389	4.27038	1.34049	0	0	1.90065	0	2.99673	0.672871	4.53412	2.04501	12.379	0	12.6892	0.678099
ENSG00000070950	845.814	984.693	580.315	457.42	504.968	534.026	550.767	559.527	664.178	1006.85	536.501	690.853	626.425	792.626	637.833	1038.28
ENSG00000070961	2241.37	2078.83	1667.58	1342.93	1410.89	1530.86	1872.22	1927.74	1871.04	2407.13	1814.86	1977.53	2048.85	2214.22	2014.62	2022.22
ENSG00000070985	0	0	0	0.948623	0	0	0	1.01018	0	0.943615	0	2.11977	0	0.952558	1.04729	0
ENSG00000071051	2557.77	1617.94	744.852	772.149	870.385	786.554	1914.65	2003.02	1291.42	2176.32	1407.64	2152.39	1555.73	1836.3	1524.11	1949.23
ENSG00000071054	9666.65	9616.74	6604.85	5989.99	5763.49	5368.84	10446.5	10828.9	7930.48	9156.47	7477.73	7529.32	8983.23	7713.3	8023.85	9649.26
ENSG00000071073	399.496	263.559	142.519	157.002	135.504	96.9111	453.803	490.763	234.424	261.2	241.723	271.256	289.715	246.481	297.881	314.013
ENSG00000071082	15462.8	17826.2	9979.74	14423.3	11219	10981.5	17599.3	20504.8	15515.9	14007.6	17829.5	12670.1	18863.2	12521.6	17578.6	17326.4
ENSG00000071127	5559.68	8343.32	2163.59	3138.56	2333.95	2644.25	5691.44	6653.5	5699.58	5231.4	6063.65	4090.96	7040.07	4035.62	5854.52	7470.54
ENSG00000071189	2809.63	1572.14	1087.19	987.886	912.489	870.903	1670.39	1898.51	2065.76	2936.22	1963	2170.12	2497.71	2596.98	2559.64	1434.24
ENSG00000071203	0	0.9726	0	0	0	0.963856	0.940034	0	0	1.93102	1.6612	0	2.37257	1.95151	0	1.89329
ENSG00000071205	417.685	459.59	212.367	241.011	218.329	210.76	299.475	328.942	269.701	393.108	230.615	376.868	269.073	363.471	276.134	433.593
ENSG00000071242	388.099	280.661	105.753	123.947	123.423	63.2394	577.818	508.368	322.212	397.155	269.064	304.222	314.134	289.979	263.617	285.874
ENSG00000071243	295.915	269.955	210.358	201.249	172.724	152.686	102.542	125.898	254.816	311.948	285.873	284.766	305.728	274.686	305.776	257.079
ENSG00000071246	1240.4	612.951	372.108	325.388	541.072	328.941	1477.16	1613.2	734.016	1026.31	669.844	1035.08	963.787	1089.6	807.99	816.331
ENSG00000071282	2385.69	347.041	189.429	223.982	194.14	132.991	761.292	968.587	528.042	1673.33	516.843	2011.18	716.035	1391.63	604.528	667.329
ENSG00000071462	1690.08	2464.2	2483.47	2647.31	2134	1959.2	2040.69	2295.67	1608.73	1706.52	1702.31	1317.6	1912.01	1314.31	1572.09	2504.59
ENSG00000071537	11294.9	4464.11	1545.03	1416.51	1430.78	1567.76	4152.64	4804.41	10989.1	10806.8	9543.54	9627.61	11840.4	10456.5	12135.4	4624.32
ENSG00000071539	1915	1395.63	895.956	876.781	951.038	836.407	584.286	719.031	1620.5	2280.85	1592	1690.59	1553.41	1921.89	1696.05	1755.66
ENSG00000071553	3006.99	3072.89	2731.58	2874.61	2875.61	2576.31	2842.38	3058.56	2731.09	2559.67	3075.06	2396.63	2657.99	2323.72	2901.31	2934.66
ENSG00000071564	3341	2665.55	1697.72	1802.04	1936.07	1749.13	2641.93	2726.74	2019.81	3068.82	2347.28	2730.61	2229.27	2875.46	2481.07	2944.8
ENSG00000071575	3495.16	1350.73	1602.91	1052.45	2139.07	1185.41	2983.64	3310.18	1403.85	2719.06	1201.55	2818.01	1612.46	2851.15	1800.57	1880.3
ENSG00000071626	3319.27	3578.59	2130.25	2058.24	1854.28	1817.88	2732.33	3182.62	2393.2	3077.21	2409.02	2550.38	2867.75	2758.32	2562.9	3942.7
ENSG00000071655	1671.53	1654.88	1202.2	1159.73	1025.3	1077.94	536.051	456.904	945.624	1218.63	1493.95	1426.44	926.885	1317.65	1241.1	1547.3
ENSG00000071677	0	0	0	0	0	0	0	0	0	0	0	0	0	0	0	0
ENSG00000071794	2782.38	1221.05	919.426	813.337	782.511	745.954	1662.02	1855.98	1791.49	2500.57	1497.44	2292.31	1901.12	2294.53	2101.91	1316.5
ENSG00000071859	1811.04	1982.94	1641.89	1833.57	1761.96	1686.42	2397.26	2542.18	1401.04	1705.83	1394.95	1380.45	1713.01	1345.18	1497.27	2012.65
ENSG00000071889	554.018	430.189	423.397	366.52	441.707	420.231	530.634	566.485	463.071	342.932	541.503	374.11	494.386	336.428	451.704	370.793
ENSG00000071894	4512.3	4580.87	9859.61	7158.74	9520.33	8030.55	4192.92	3789.56	3669.4	3579.19	3989.86	3327.42	3380.77	3415.44	4093.35	4687.08
ENSG00000071909	11.6074	5.00445	8.56462	7.64747	1.05381	2.05826	4.71288	10.615	5.91339	8.94749	14.6253	9.5696	14.0661	7.27803	6.82826	10.1487
ENSG00000071967	1606.33	1122.1	883.312	792.891	709.119	641.215	1109.83	1213.39	914.643	1585.48	1091.28	1478.39	1407.71	1402.58	1314.93	1246.38
ENSG00000071991	2.4388	0	0	0	0	0	0	0	4.23178	0	0	0	0	0.300788	2.04066	0
ENSG00000071994	1946.17	2465.65	1320.04	1580.53	1384.24	1431.41	1516.31	1872.32	1715.22	1883.8	1972.86	1666.28	2125.62	1707.45	1934.63	2258.31
ENSG00000072041	432.511	480.859	222.506	239.341	201.318	197.373	830.098	1233.57	278.036	333.192	293.048	329.494	526.281	342.108	330.874	462.379
ENSG00000072042	5390.64	4073.26	3432.18	3203.28	3445.89	3539.72	2967.11	3476.87	5699.42	5622.22	5994.19	4639.95	6152.47	4677.08	6012.98	3909.93
ENSG00000072062	2083.86	1760.71	554.979	753.303	694.955	636.329	1934.71	1924.07	1681.5	2017.69	1616.43	1670.2	1591.54	1785.82	1884.31	1965.34
ENSG00000072071	2809.08	1756.51	1434	1262.27	1410.67	1055.92	1803.36	1739.7	1333.21	2392.24	1261.31	2033.51	1242.02	2214.17	1431.57	2137.92
ENSG00000072080	11.078	31.2802	31.4014	6.75583	23.4897	4.27891	10.6729	13.7027	9.79997	10.9825	7.93597	12.5249	19.857	11.5716	6.12414	19.0228
ENSG00000072110	21840.8	19588.5	9582.8	10308.8	10663.9	11292.4	18070.7	19275	23039.4	20314.8	23477.4	17281.3	24871.5	16583.9	21573.4	19717.6
ENSG00000072121	2126.46	1473.34	1567.23	947.407	843.209	1069.37	1586.6	2208.86	2589.67	2961.34	1795.74	2440.12	2543.05	1856.67	2240.33	1412.73
ENSG00000072133	760.128	328.029	324.096	110.214	210.066	306.752	615.953	454.397	524.306	507.6	616.164	532.12	697.739	443.692	837.57	518.168
ENSG00000072134	922.889	1562.14	525.471	651.025	564.053	566.922	1845.56	1684.56	1312.56	1013.79	1424.64	924.045	1542.95	908.669	1306.88	1233.17
ENSG00000072135	1325.55	1272.46	790.044	764.056	722.766	671.766	1082.28	1302.97	983.98	1238.02	935.553	1137.1	1180.32	1078.89	1022.52	1317.91
ENSG00000072163	164.291	297.943	436.661	310.868	258.501	288.935	201.575	172.381	73.4313	151.246	99.8072	155.722	67.4544	126.962	87.0949	382.443
ENSG00000072182	38.8207	17.8501	15.0034	14.1136	31.1868	17.9964	33.051	25.8282	38.6627	40.7399	44.7562	29.1932	19.0313	34.8738	31.8438	13.3013
ENSG00000072195	1676.44	2107.54	3722.54	3092.38	3177.27	2653.19	2135.95	1807.15	947.306	1374.09	1297.2	1224.26	1199.38	1316.42	1231.58	2291.68
ENSG00000072201	182.327	121.219	54.9385	55.0233	62.4425	56.3153	87.7157	72.7851	77.7273	228.381	101.843	103.929	80.2825	158.503	116.588	147.057
ENSG00000072210	954.643	1599.78	1043.29	968.246	796.357	901.759	1641.87	1888.48	839.297	979.756	834.534	907.175	892.737	969.875	1009.09	1594.86
ENSG00000072274	17684.9	18804.4	7741.91	7968.12	6053.79	6902.42	7993.23	9650.3	17872.6	17805.2	19133.1	14052.4	16580.5	16192.9	19268.4	19555.1
ENSG00000072310	4311.1	1765.97	1726.53	1174.81	1592.75	1140.73	1411.74	1250.55	1865.01	4459.48	1493.79	2636.67	1928.09	3322.41	2042.65	2716.45
ENSG00000072315	0	0	0	0	0	0	0	0	0	0	1.00333	1.00529	0	1.00187	0	0
ENSG00000072364	8831.44	7520.79	1964.62	2050.74	1805.23	2040.37	9225.88	9787.48	9222.65	8269.49	7173.58	6682.13	11232	7882.8	8487.07	6917.04
ENSG00000072401	852.812	933.124	539.221	612.436	489.371	491.605	1113.17	1378.67	1168.52	869.975	1137.66	829.434	1390.82	814.7	1235.8	778.137
ENSG00000072415	6460.6	4942.22	1909.71	1955.97	2110.23	1982.75	3797.31	4299.76	4550.28	7473	5071.07	5715.79	5417.94	6452.52	5853.01	5420.23
ENSG00000072422	1910.84	961.495	1036.91	952.694	1010.35	674.063	1294.86	1630.65	984.268	2059.74	1068.13	1397.51	1367.32	1533.14	1073.49	1315.53
ENSG00000072501	10607.4	7806.58	2340.04	2473.06	1934.66	2292.46	4809.35	4643.3	8758.37	10020.7	7544.97	8268.48	8864.26	9259	8218.54	8115.52
ENSG00000072506	1371.15	1720.2	808.972	1087.39	969.734	867.139	781.753	923.029	1123.44	1205.73	1211.86	1165.68	1133.47	1112.78	1124.47	1840.46
ENSG00000072518	932.925	1138.22	447.113	540.274	407.969	432.641	806.246	836.611	889.998	828.211	858.361	755.03	843.139	737.743	928.999	1025.36
ENSG00000072571	2408.56	2126.35	1171.99	1669.44	1407.47	1607.88	1780.27	2256.25	2859.46	2322.1	2738.63	1833.6	4063.17	2058.54	3281.5	1846.04
ENSG00000072609	163.361	266.51	319.176	255.045	262.615	313.579	242.62	264.756	176.606	164.657	185.195	166.741	219.563	154.186	147.949	271.992
ENSG00000072657	339.553	416.013	93.1006	183.261	125.922	114.109	283.057	393.825	143.262	329.431	304.635	244.676	292.534	435.143	199.573	442.206
ENSG00000072682	3323.53	2169.37	1909.42	1973.91	1987.03	1886.47	5107.57	6027.29	2891.05	3558.91	3118.37	2585.01	3488.49	2620.21	2939.72	2302.6
ENSG00000072694	0	1.04418	0	0	1.5664	0	0	0	0	1.96575	0	0	0	0.905541	0	0
ENSG00000072736	1762.46	1170.99	508.245	510.454	538.158	543.035	1272.15	1492.09	1443.02	1620.81	1397.53	1326.63	1465.28	1385.49	1550.37	1322.24
ENSG00000072756	689.401	1093.9	926.592	932.952	791.568	777.631	722.87	799.929	768.01	729.262	803.045	611.844	1040.89	656.895	813.768	947.464
ENSG00000072778	5430.93	5978.37	16499.8	14616.3	15128.5	12461.9	7820.92	8326.26	4964.85	5360.29	5265.19	4190.77	5880.04	4406.19	5061.05	6309.66
ENSG00000072786	1044.17	1238.22	1193.46	1034.2	881.311	853.16	1364.5	1286.91	1185.85	1142.13	1172.97	579.644	959.334	631.234	1002.02	1396.76
ENSG00000072803	2111.56	2139.86	769.221	780.917	695.789	670.966	1883.61	2133.93	1653.29	1862.5	1636.55	1582.19	1629.33	1713.41	1753.53	2097.58
ENSG00000072818	56.96	88.9258	44.8572	65.3284	53.3983	26.2159	60.5646	79.4762	72.1489	28.1044	75.4397	49.9416	71.2792	48.292	52.8822	51.4491
ENSG00000072832	2037.63	1116.67	535.033	559.171	654.896	523.371	1540.52	1676.29	1363.43	1836.56	1541.09	1735	1390.1	1698.23	1496.35	1384.76
ENSG00000072840	403.973	418.505	240.622	221.59	163.212	185.233	351.569	379.375	273.043	366.744	268.636	256.995	266.032	242.023	210.871	430.624
ENSG00000072849	844.577	884.08	1005.59	964.769	825.38	826.958	396.822	461.644	791.042	766.205	790.502	638.498	751.733	655.867	671.661	755.5
ENSG00000072858	0.45407	9.75655	23.3667	4.61062	7.29358	8.05224	7.61875	10.439	6.52146	2.65228	6.00964	8.59858	9.11842	6.86643	6.18542	10.2179
ENSG00000072864	1938.35	891.124	390.705	500.464	464.959	422.848	933.021	1078.36	1232.75	1685	1240.51	1502.51	1460.62	1482.72	1441.95	1074.88
ENSG00000072952	1.75692	3.33331	2.60085	0.876644	2.04691	0	6.82131	4.21333	6.44975	0	3.52501	1.76605	1.68594	2.64004	25.5037	4.17098
ENSG00000072954	306.843	286.518	186.409	227.269	173.655	153.607	485.305	587.265	190.08	268.069	233.069	251.123	246.483	264.046	237.964	331.288
ENSG00000072958	1244.14	1369.12	676.498	753.695	685.677	665.365	902.205	1064.21	1047.88	1164.75	1222.26	1029.49	1048.99	975.016	1035.24	1388.54
ENSG00000073008	2064.97	2222.4	1231.75	1302.54	1528.86	1582.82	1978.18	2093.43	2411.3	2212.48	2478.39	1546.6	2139.27	1658.26	2165.03	2104.28
ENSG00000073050	1457.67	829.911	614.483	638.805	838.241	695.808	988.535	1115.83	915.363	1432.94	887.493	1300.03	1087.32	1206.12	973.78	967.309
ENSG00000073060	1734.8	2741.14	1873.96	1507.34	1397.5	1236.13	1709.88	1931.75	1614.05	1608.38	1544.57	1379.7	1442.76	1538.56	1765.97	3135.67
ENSG00000073067	5.63045	0.885188	1.74444	1.73267	1.84054	4.72544	0	0.846869	0.869078	2.65256	0.886975	0.890339	0	0.886684	4.40859	0.881316
ENSG00000073111	5073.56	2729.35	1920.66	1947.54	1549	1131.74	1001.74	1091.06	1633.16	4682.08	1699.15	4126.55	1824.97	4074.46	2281.83	3876.59
ENSG00000073146	49.5827	38.0869	41.9273	48.9731	51.6153	63.5423	37.991	27.959	30.7827	50.76	16.2658	61.7322	37.7874	40.3749	35.7297	34.2296
ENSG00000073150	280.96	297.506	239.789	242.632	126.469	116.511	233.355	214.667	165.225	236.731	214.023	249.49	223.816	233.559	245.193	229.222
ENSG00000073169	298.404	356.405	598.918	552.833	589.182	594.151	394.2	332.323	260.087	249.7	420.308	269.497	287.898	293.309	271.54	321.894
ENSG00000073282	10.6878	5.03022	3.34201	3.53192	2.12537	6.15114	2.86553	5.51427	1.41213	16.8665	0	4.33584	7.95796	9.86291	3.57203	2.87733
ENSG00000073331	706.744	383.558	504.743	514.54	390.911	274.387	1021.36	1269.45	542.824	591.791	392.509	624.785	590.058	608.659	625.001	520.183
ENSG00000073350	12.3364	25.9599	24.0266	22.2321	15.9038	10.664	14.1814	3.49045	6.73367	4.83466	5.25156	28.9668	8.11766	11.9811	6.38195	26.7344
ENSG00000073417	1001.18	1065.59	1379.72	1045.02	1105.75	917.885	993.467	1078.93	765.478	1021.49	792.588	772.157	896.143	864.875	829.57	1043.77
ENSG00000073464	709.689	430.435	201.479	192.511	166.399	155.678	371.547	341.782	261.092	437.934	227.442	437.67	333.961	401.885	327.502	526.868
ENSG00000073536	827.031	1218.55	447.884	570.017	467.532	390.78	584.931	690.762	797.768	634.446	920.538	709.223	728.45	619.408	852.202	1124.4
ENSG00000073578	3655.69	2172.53	2099.25	1892.4	1962.67	1616.17	2814.16	3135.65	3426.77	3194.21	3765.85	2976.03	3582.19	2921.66	3705.83	2355.82
ENSG00000073584	4907.06	3205.03	1661.95	1855.85	1970.65	1848.33	3316.23	4103.97	3977.12	4933.66	3767.42	4383.14	5198.07	4214.05	4137.54	3310.07
ENSG00000073598	0	0	0	0	0.987076	0	0	0	0	0.996203	0	0	2.87194	0	0	0
ENSG00000073605	333.272	198.12	870.795	684.424	990.654	891.245	485.529	505.151	273.002	343.984	269.03	225.907	305.762	264.222	325.177	200.368
ENSG00000073614	2470.7	1941.95	906.809	926.841	716.227	688.145	1628.82	1562.99	2492.02	2373.2	2568.66	2385.27	2087.7	2001.96	2352.33	2189.6
ENSG00000073670	422.615	74.4061	115.971	96.3461	126.517	98.6567	163.064	226.146	304.967	358.154	229.625	301.444	253.6	352.915	254.201	81.7666
ENSG00000073711	1190.18	722.142	369.468	423.284	285.822	373.973	776.591	752.206	971.569	1166.63	1027.18	948.143	1121.66	959.257	1197.48	546.314
ENSG00000073712	4112.57	4189.98	1956.73	2163.07	2261.89	2203.48	3671.06	3852.78	3214	4210.47	3464.29	3594.73	3923.87	3613.09	3387.69	4131.21
ENSG00000073734	14.6308	17.637	27.9744	46.2126	18.2177	28.9695	7.90884	35.6367	43.2443	19.2359	62.2982	10.0531	20.232	12.2578	82.7311	83.0835
ENSG00000073737	0	3.13316	6.50592	13.3723	3.96175	4.04767	20.0189	21.7596	9.44316	6.52306	8.64009	7.09126	6.04598	0	2.38506	1.18368
ENSG00000073754	2.00075	4.00695	2.96044	3.99446	1.9718	0	2.91153	6.70738	0	0.993741	2.00669	2.01466	0	1.00345	0	0
ENSG00000073756	117.965	88.4112	37.1904	30.089	15.6025	20.9423	89.9572	70.0698	241.034	107.053	237.019	95.457	175.743	73.0934	182.837	60.7321
ENSG00000073792	4276.17	3475.33	1986.04	1750.53	2041.37	2090.65	4532.31	4714.2	3743.65	4419.48	3706.67	3456.66	4035.95	3430.09	3709.55	3790.18
ENSG00000073803	949.867	756.58	366.031	428.534	392.388	364.567	945.379	1115.32	869.249	970.433	968.31	917.743	1238.66	854.437	1052.4	706.938
ENSG00000073849	386.205	87.9786	62.3316	58.3947	82.3037	78.1643	200.975	214.148	192.015	363.038	215.461	336.727	252.734	275.92	226.229	184.56
ENSG00000073861	4.94802	1.9816	0.976271	1.97557	0.975359	0	10.5619	9.48221	17.5089	1.96564	23.8223	0.996068	31.2906	0	35.5591	0
ENSG00000073905	0	0	0	0	1.01812	0	0.993245	0.981635	0	1.02501	0	1.04142	0	0	0	3.42009
ENSG00000073910	99.2808	53.824	40.2351	21.9429	123.606	23.4284	204.503	130.775	46.0338	58.1193	45.7238	118.851	74.9875	65.1451	42.5777	68.2836
ENSG00000073921	4552.09	6860.82	3625.47	3638.81	2836.73	3148.57	6462.27	6794.49	4083.44	4764.95	3345.69	3532.03	4658.15	3576.01	3945.55	6046.91
ENSG00000073969	2115.41	2523.97	832.914	1047.17	631.015	820.654	2691.4	3059.91	2344.17	2156.89	2409.47	1903.63	2910.4	1904.99	2566.01	2416.58
ENSG00000074047	2865.94	1294.45	1000.31	674.1	1043.46	688.172	1109.01	870.465	943.946	2509.79	1120.07	2282.1	720.299	2275.23	1244.57	1219.09
ENSG00000074054	4843.34	2794.86	1561.34	1580.74	1426.01	1404.48	2032.89	2080.41	2880.03	4127.81	2417.43	3546.82	2497.91	3711.1	2743.08	2694.47
ENSG00000074071	1618.03	1483.4	880.114	1079.86	867.482	736.128	1236.88	1457.02	1101.22	1395.33	1339.97	1271.58	1724.87	1262.39	1309.55	1494.79
ENSG00000074181	3482.26	1097.3	839.611	852.505	935.49	475.995	2448.44	2177.6	1646.97	2695.07	1975.87	2388.08	1496.37	2339.5	1608.03	1701.87
ENSG00000074201	2974.46	4587	2626.85	3117.12	2368.4	2647.58	4072.1	5171.69	2539.11	2989.89	2732.65	2515.71	3464.85	2611.32	2902.75	4364
ENSG00000074211	1579.91	2264.69	1204.44	1293.52	1009.44	930.566	2261.56	2577.13	1159.28	1541.08	1180.42	1200.94	1290.3	1400.79	1212.93	2412.94
ENSG00000074219	1620.62	781.87	387.259	463.304	525.034	460.483	1207.96	1449.67	888.871	1467.06	832.469	1245.99	1068.88	1275.96	962.42	1084.51
ENSG00000074266	766.62	982.297	1319.14	1126.91	1213.27	983.817	563.728	663.329	664.878	702.001	702.757	714.532	672.563	643.161	680.601	1028.39
ENSG00000074276	5.73735	0.55626	0	11.477	0	0.623666	0	1.80794	5.67106	6.35563	0.557534	11.6783	0.533124	0	0.552451	0.556166
ENSG00000074317	56.0936	27.1148	12.1069	10.214	19.544	15.7546	68.2983	55.9704	55.5621	45.2734	48.5671	48.0962	33.238	46.1856	41.8272	18.4995
ENSG00000074319	983.878	1408.6	541.296	926.136	634.986	675.215	1673.2	1938.04	1301.09	1011.14	1030.62	871.635	1480.21	875.612	1158.37	1195.35
ENSG00000074356	1133.14	1144.46	1172.6	1057.37	1087.4	1167.34	829.528	836.167	1073.57	1011.14	1106.94	865.459	1174.49	967.111	1060.38	1142.8
ENSG00000074370	282.718	79.8072	64.749	105.789	65.7038	45.5879	223.249	182.921	142.269	259.587	194.153	275.778	173.81	245.652	197.471	48.2093
ENSG00000074410	1682.24	680.342	699.286	572.514	375.624	258.004	1029.23	1181.93	691.509	2167.48	715.479	1263.73	707.264	1562.04	829.875	986.434
ENSG00000074416	840.413	928.584	440.112	496.945	240.906	228.11	504.564	587.693	666.676	750.164	678.073	719.072	649.398	584.702	648.886	902.035
ENSG00000074527	513.197	569.735	710.765	695.058	396.846	392.584	870.73	1060.91	479.272	542.551	578.286	445.533	556.523	460.037	527.034	566.538
ENSG00000074582	416.163	528.87	821.6	787.679	916.549	780.73	421.253	547.063	480.692	470.991	470.85	370.597	529.291	383.012	432.038	627.008
ENSG00000074590	3490.32	2446.84	878.155	836.241	871.418	719.744	1232.63	1247.32	1662.02	2644.02	1682.61	2564.71	1590.75	2213.62	1678.62	2967.37
ENSG00000074603	1703.32	1413.59	815.648	811.209	845.779	805.631	1264.57	1309.79	1674	1481.68	1446.68	1286.11	1555.38	1365.1	1618.63	1224.02
ENSG00000074621	796.537	451.102	428.157	351.04	259.851	342.513	268.151	334.09	696.721	701.258	614.725	538.347	853.126	488.22	538.375	365.814
ENSG00000074657	3902.05	3197.74	2359.3	1747.1	1734.34	1523.93	2888.26	2717.69	2385.88	3938.56	2076.55	3143.19	2563.31	3322.89	2406.52	3372.96
ENSG00000074660	10.8807	30.7437	50.6952	39.7878	29.0737	43.4963	18.3504	17.5835	22.6438	8.15681	16.6474	7.5778	16.9048	10.1812	17.1354	20.3363
ENSG00000074695	4409.39	6444.18	4634.43	4638.31	3497.3	3820.11	8668.45	9828	4023.25	4351.71	4214.18	3694.67	4733.09	3892.57	4503.48	6174.79
ENSG00000074696	5994.6	4935.22	4026.09	4088.8	3592.14	3405.78	4436.97	5165.81	3337.42	6291.92	3342.24	5185.32	3710.22	5252.9	3853.22	6010.26
ENSG00000074706	4.52222	0.786372	2.0423	2.31406	5.4225	3.88459	1.89935	25.6535	13.5834	21.713	0	3.16602	1.56657	3.14535	6.55801	0
ENSG00000074755	1264.54	899.794	601.179	461.407	530.094	507.233	752.557	811.451	740.881	1125.44	787.473	844.039	662.861	935.851	810.287	1059.55
ENSG00000074771	0	0	0	0	0	0	0	0	0	0.992605	0	0	0	0	0	0
ENSG00000074800	56181.1	64499.4	34865.8	45249.1	34843.2	32635.3	44830.7	54395.2	47494.4	61383.2	50400.7	44516.6	57138.3	46641.1	49292.3	69349
ENSG00000074803	0	0	0	0	0	0	0	0.784706	0	1.52298	0	0	0.785085	0	0	0
ENSG00000074842	1091.39	1779.33	1462.89	1804.08	1300.93	1325.29	1708.61	2040.64	1160.73	1031.25	1465.31	919.834	1372.93	894.325	1316.33	1830.09
ENSG00000074855	358.67	154.187	322.819	250.138	304.49	196.129	323.806	308.967	163.639	239.406	180.47	225.08	213.613	230.919	192.093	252.762
ENSG00000074935	314.701	398.884	360.364	306.955	359.122	295.897	321.783	448.623	375.522	314.851	390.41	232.289	493.561	281.056	394.57	373.41
ENSG00000074964	393.304	468.783	776.433	697.217	470.837	417.549	481.235	499.209	190.951	321.104	208.6	396.717	176.85	332.896	157.211	543.272
ENSG00000074966	20.9148	4.63215	4.22653	4.4287	7.08042	4.7381	3.98693	3.96185	3.33375	12.1201	9.698	5.64709	1.47828	17.8889	3.7189	6.44815
ENSG00000075035	8.28226	0.654916	5.28264	0.652988	0	0.64932	15.2347	5.125	0.642927	3.11815	4.59115	1.31628	12.9507	19.539	2.23055	5.83835
ENSG00000075043	5.4916	4.06884	61.9247	6.21047	11.8924	55.7589	28.5593	47.6302	5.75173	4.18361	4.58788	8.27683	3.49036	7.28845	4.54602	1.17966
ENSG00000075073	1.02715	0	0	0	2.02438	1.01984	0	1.59019	3.03082	1.0208	3.03773	0	2.94821	1.03099	1.00334	0
ENSG00000075089	297.769	416.156	280.868	342.575	232.584	287.644	506.132	563.35	319.641	314.807	374.589	290.668	484.162	257.043	382.296	354.161
ENSG00000075131	620.968	683.842	408.738	467.955	446.35	388.831	314.235	296.52	402.527	688.131	440.943	550.033	493.191	563.782	451.406	671.541
ENSG00000075142	2345.62	2360.84	1216.09	1605.12	1412.92	1206.67	2190.61	2708.51	1662.11	2082.84	1798.53	2002.07	1944.1	1920.33	1814.54	2536.03
ENSG00000075151	1987.56	2355.83	2179.98	1634.08	1720.51	1743.3	2405.88	2290.65	1537.65	1888.04	1436.01	1402.39	1564.54	1524.59	1616.05	2452.36
ENSG00000075188	647.421	680.772	474.883	622.499	512.781	550.335	360.207	500.682	515.437	696.869	551.25	555.862	548.56	556.728	590.945	760.734
ENSG00000075213	1178.61	56.6707	45.174	64.2005	51.3242	77.7985	515.995	685.92	530.432	767.155	585.399	835.597	638.117	750.539	628.023	131.293
ENSG00000075218	3280.32	2101.58	1982.34	1548.6	1766.69	1671.86	1115.6	1187.38	1834.25	2921.38	1992.23	2474.39	1865.48	2552.18	2177.95	2681.69
ENSG00000075223	4498.9	2574.39	1198.25	1188.46	1365.71	1276.65	5523.8	6057.55	2548.23	4253.17	2423.72	3584.23	2581.38	3382.7	2678.3	2686.35
ENSG00000075234	419.783	510.04	390.935	282.648	269.872	293.832	446.008	467.288	267.743	411.794	312.266	329.234	316.281	406.143	323.625	501.271
ENSG00000075239	918.758	1828.6	1468.64	1571.21	1381.26	1274.31	1733.8	2074.53	925.215	1065.98	930.377	870.624	1174.9	858.404	1031.69	1786.64
ENSG00000075240	643.751	432.391	364.837	370.705	314.315	298.664	801.194	1036.66	444.308	631.855	446.415	349.319	326.53	309.91	349.179	515.277
ENSG00000075275	35.3726	17.3142	49.1945	34.6531	18.0542	22.659	17.5427	9.60568	15.2198	23.8355	18.3095	19.6904	12.8139	36.1969	9.9504	10.9772
ENSG00000075290	0	0	0	0	0	0	2.91242	0.958431	0.983911	0	1.00368	1.00782	0.958253	1.00391	0	0
ENSG00000075292	5367.93	4291.04	8830	6824.61	7695.61	7176.77	4128.02	4125.66	3687.9	4746.08	3837.56	3946.22	5045.02	4495.6	3959.88	4397.55
ENSG00000075303	603.983	589.686	571.513	554.273	543.317	460.254	356.605	451.008	396.565	660.61	419.325	772.613	465.024	496.767	596.416	646.436
ENSG00000075336	696.505	1395.24	1386.38	1342.58	1184.38	1149.33	745.755	844.288	636.418	698.032	688.82	521.278	776.163	539.965	625.387	1332.69
ENSG00000075340	33.8431	725.15	455.297	474.216	165.71	134.796	452.717	425.375	15.0751	32.0016	21.1714	22.1217	16.281	37.4708	16.7257	925.675
ENSG00000075388	1.00094	1.00202	0	0	2.95978	4.96701	11.6559	11.5136	3.93462	2.98165	5.02026	4.02817	5.75741	2.00677	6.96426	1.00001
ENSG00000075391	2337.29	1862.68	1409.79	1353.3	1148.84	990.05	1832.81	1872.88	1635.17	2545.52	1429.35	2086.19	1653.18	2112.94	1604.11	2119.54
ENSG00000075399	473.803	376.202	944.03	812.174	982.494	801.766	531.613	521.201	356.147	415.472	401.455	356.224	342.323	389.803	325.413	418.094
ENSG00000075407	1734.77	1307.1	898.973	779.082	965.522	819.389	1208.02	1293.87	1400.91	1710.52	1343.63	1332.61	1594.79	1516.82	1494.59	1133.11
ENSG00000075413	1349.17	994.571	973.545	834.214	1190.44	1119.8	1337.4	1636.87	1107.93	1447.53	1203.19	1105.86	1442.47	1129.9	1345.18	965.584
ENSG00000075415	6768.99	9291.57	6279.2	7288.22	5231.61	5628.67	5029.93	5561.55	8349.36	6481.39	9142.69	6420.28	7847.49	5904.64	9680.65	8227.35
ENSG00000075420	3638.02	3429.32	1035.96	947.459	793.895	959.728	2879.68	3069.6	2751.22	3668.76	2636.69	2907.2	2653.65	3020.37	2881.53	3504.75
ENSG00000075426	9091.47	6205.61	3336.87	3410.46	3428.03	3175.93	5911.09	6132.58	5834.71	9406.66	5600.69	6804.9	5372.26	7526.57	6321.99	6209.68
ENSG00000075429	2.7194	0	0	0.905226	0	0	5.27324	7.77463	3.56866	4.50742	1.81791	0.914709	0	1.82144	6.7444	2.67059
ENSG00000075461	1.00066	0	0	0	0	0	0	0	0	0	0	0	0	0	0	0
ENSG00000075539	3690.44	3378.8	2327.92	1924.39	2050.33	1875.07	2256.78	2378.27	2809.54	3286.42	2388.52	3089.67	2268.94	3159.49	2578.45	3247.47
ENSG00000075568	3758.84	3141.33	2263.17	1957.95	1696.88	1800.66	2318.51	2618.6	3257.54	3892.92	3073.8	2889.23	3027.9	3349.24	2961.1	2833.62
ENSG00000075618	13766.9	6612.77	2827.87	4044.78	2960.7	3078.23	6560.28	7100.9	11502.9	11835.6	15775.5	12186.7	11258.5	11533	13688.9	6899.22
ENSG00000075624	141303	156660	99259.3	113902	98049.9	91416.9	60274.5	59780.1	152234	142515	165130	116225	123388	117234	149058	162412
ENSG00000075643	424.564	598.63	412.203	248.239	335.179	231.192	552.52	580.758	240.737	389.361	251.393	295.668	273.921	372.366	338.984	491.905
ENSG00000075651	819.439	1036.42	613.898	603.678	594.297	498.948	1519.02	1541.43	530.438	802.694	389.89	665.755	532.238	683.489	649.054	825.027
ENSG00000075673	1.08909	1.90072	6.55875	4.73799	0.93594	0	11.9798	7.28426	0.93283	1.08117	3.27739	3.2861	2.94076	7.61163	3.24752	0
ENSG00000075702	1818.31	990.789	1260.14	882.191	1372.65	1184.48	829.999	871.961	1337.66	1541.14	1304.51	1308.43	1209.27	1483.51	1489.18	1143.71
ENSG00000075711	3982.31	2583.22	2010.56	1551.17	1798.95	1504	2011.95	2199.52	2909.91	4305.11	2543.8	3177.47	2836.59	3573.17	2930.82	2851.3
ENSG00000075785	4443.31	4741.63	2142.38	2639.23	1827.19	1997.36	5800.48	6720.41	4731.11	4877.72	3956.03	3846.25	6628.6	3818.15	4229.06	4721.79
ENSG00000075790	1103.37	1210.77	1070.72	1105.32	896.016	959.632	823.114	1004.21	932.898	1088.34	871.255	935.609	1122.4	950.382	1016.78	1095.89
ENSG00000075826	516.194	268.347	796.583	560.939	574.983	524.082	385.118	396.952	477.227	504.639	399.588	306.503	351.218	378.21	507.929	357.971
ENSG00000075856	1828.51	1638.4	1341.03	1047.25	1064.35	930.503	1419.73	1442.42	1395.02	1542.34	1411.64	1221.91	1733.55	1377.1	1515.03	1656.93
ENSG00000075884	9.12757	14.6003	11.2876	12.5556	6.63832	10.9483	27.3882	32.4754	8.21661	9.2454	2.22074	8.30757	7.72064	12.5005	5.77442	8.3525
ENSG00000075886	47.3499	7.22376	5.5784	7.89408	5.04426	12.8662	18.5473	23.8306	14.8796	46.6335	28.4401	40.7699	45.7611	42.6139	50.8448	2.85839
ENSG00000075891	118.12	21.0249	37.4365	23.7215	20.4174	23.7841	52.5063	46.2237	53.8616	60.8357	47.5189	45.2351	62.0511	38.6272	52.2362	28.1767
ENSG00000075914	695.175	847.528	614.638	737.308	616.715	533.012	773.261	898.987	639.063	572.235	663.695	546.209	633.975	501.273	621.562	912.536
ENSG00000075945	643.594	603.973	583.089	546.461	505.437	490.655	953.624	1053.47	515.452	547.97	477.692	525.907	609.773	497.092	539.751	595.924
ENSG00000075975	883.581	1099.14	621.591	755.59	672.716	613.949	977.359	1138.94	667.882	869.603	767.631	865.979	822.185	831.978	794.443	1077.84
ENSG00000076003	4124.04	2961.32	1670.25	1550.5	1495.51	971.718	1430.87	1627.27	1666.36	4429.41	1788.63	3999.69	1880.05	3983.55	2100.88	3805.12
ENSG00000076043	2053.01	4171.08	3235.8	3710.48	2912.08	2938.06	3262	3868.21	2182.55	2111.08	2194.43	1848.14	2662.72	1681.65	2109.15	3965.68
ENSG00000076053	1502.63	2041.38	738.793	961.754	696.719	893.429	1830.72	2054.75	1767.73	1534.71	1651.77	1254.54	2257.34	1367.74	1795.37	2056.1
ENSG00000076067	2793.43	4011.87	1366.37	1253.34	741.788	1238.99	2835.23	2741.1	2412.85	2500.09	2570.47	2289.75	2624.28	2299.98	2118.08	3814.24
ENSG00000076108	5209.47	5248.95	2253.32	2205.72	1905.05	1834.34	6026.38	6637.81	4328.64	4710.76	4027.17	3614.32	6079.58	3951.41	4424.99	4560.33
ENSG00000076201	1979.49	2117.2	1462.8	1517.28	1310.13	1330.35	1562.01	1548.22	1898.57	1746.43	2008.22	1482	1712.1	1794.3	2080.1	2055.29
ENSG00000076242	2397.91	1710.76	1065.56	1279.73	983.665	918.849	881.156	1251.75	1754.95	2141.34	1705.09	2111.52	1953.49	2103.3	1848.42	1976.55
ENSG00000076248	1599.05	1127.93	699.923	659.942	737.893	582.554	462.402	536.368	723.077	1558.41	736.938	1508.87	825.214	1578.55	855.345	1386.69
ENSG00000076258	56.7223	47.0289	54.3821	59.2553	33.4253	32.3829	97.0728	176.664	59.1327	69.9633	58.7888	67.0131	65.904	73.3418	90.7788	46.0166
ENSG00000076321	578.969	601.509	250.378	285.007	246.533	306.699	537.695	513.203	447.565	459.06	547.445	393.026	520.938	367.651	558.351	587.321
ENSG00000076344	2.00327	1.00305	2.9638	1.32476	2.21556	4.28622	0.971628	0.834131	1.96946	1.98996	0	0	0.731434	0	2.98134	1.99678
ENSG00000076351	566.59	727.527	531.143	498.806	371.099	371.83	671.329	641.869	535.684	566.07	481.866	461.806	457.993	481.903	515.4	945.712
ENSG00000076356	388.751	388.755	497.95	543.286	319.035	486.608	389.065	283.768	790.165	414.204	677.629	288.729	502.617	210.505	598.826	279.428
ENSG00000076382	5578.9	3640.5	6452.5	4921.46	6064.11	4919.05	3034.95	3046.79	5722.63	6000.06	5685.03	4631.63	6430.7	5017.52	6199.16	4259.25
ENSG00000076513	710.516	1197.84	659.766	610.148	472.711	571.611	1007.72	1016.64	1362.55	718.911	1313.12	492.29	1279.85	531.866	1141.17	813.706
ENSG00000076554	2468.75	3128.51	914.468	1333.26	766.696	865.609	2025.3	2587.77	1559.7	2345.21	1420.45	1669.18	1565.79	2127.75	1741.43	3558.1
ENSG00000076555	146.02	109.813	139.687	90.6298	132.977	80.5315	107.825	105.763	109.511	129.657	68.9117	88.4488	72.1633	193.006	70.915	152.071
ENSG00000076604	1657.82	2208.87	1814.68	1493.6	1496.37	1347.36	1499.03	1690.22	2673.26	1526.09	2767.53	1408.3	2346.38	1380.43	2645.78	1963.96
ENSG00000076641	52.813	58.0008	130.398	74.7161	95.9672	40.8247	177.642	259.671	133.302	51.1768	88.3681	53.0785	111.219	218.12	183.903	62.8052
ENSG00000076650	324.596	243.325	267.639	271.284	299.856	274.873	317.736	334.248	248.399	286.261	318.465	297.227	284.977	282.563	256.482	263.303
ENSG00000076662	46.166	67.3213	52.4702	58.2419	35.6213	27.5462	46.3971	82.5286	63.2351	28.7117	44.2823	43.1926	59.3045	29.9468	48.9032	57.4766
ENSG00000076685	1909.98	1583.32	1669.53	1391.6	1287.19	1121.1	1502.86	1555.32	1260.87	1988.55	1246.49	1721.97	1602.96	1617.71	1480.28	1884.84
ENSG00000076706	6102.67	7013.02	5498.19	5956.43	6279.74	6397.37	4413.7	4823.11	5793.83	6110.25	6589.97	4933.7	6007.97	5088.36	6008.86	7179.44
ENSG00000076716	1494.26	553.911	579.759	471.428	544.573	452.848	859.682	902.318	713.791	1372.86	720.872	1249.72	771.048	1105.01	770.01	657.261
ENSG00000076770	306.94	55.5532	37.026	20.5242	20.2299	16.9124	35.1263	45.8328	110.437	169.105	95.1447	229.408	118.887	193.269	113.93	60.5642
ENSG00000076826	149.997	104.857	203.108	174.945	249.125	114.737	309.247	246.726	100.93	95.3356	81.873	117.164	76.8851	103.21	100.615	116.942
ENSG00000076864	192.548	159.717	164.758	162.73	172.633	117.21	391.465	446.301	117.432	154.039	114.534	141.63	128.184	126.924	130.215	206.552
ENSG00000076924	1242.04	1275.8	1020.67	1223.08	1040.88	923.93	1314.9	1385.45	1002.87	1032.22	1212.24	1028.12	1165.03	983.871	1153.63	1129.94
ENSG00000076928	1717.02	843.745	993.724	1006.76	1231.81	1203.78	1280.57	1228.65	1263.86	1442.25	1399.17	1458.35	1368.25	1190.89	1484.22	712.926
ENSG00000076944	710.752	635.067	866.725	882.534	960.165	685.733	945.935	807.835	655.323	664.281	662.915	497.926	842.724	543.333	665.833	691.443
ENSG00000076984	903.145	918.938	879.498	732.255	730.796	753.389	689.938	783.03	780.621	729.96	981.929	666.257	862.609	660.658	837.538	875.985
ENSG00000077009	1.05072	0.775091	0	2.27358	2.06987	0	5.2463	8.12595	0	0	0	0	0	0	0	0
ENSG00000077044	2301.94	3926.68	5005.03	3795.68	3040.79	3328.69	4238.54	4441.33	3087.03	2403.82	2951.89	1633.98	2200.95	1895.17	2921.84	4355.69
ENSG00000077063	147.444	82.6984	132.2	81.0926	72.9007	49.446	90.6647	75.6596	75.2885	121.348	55.3873	92.6533	51.6585	89.6067	80.0016	89.7422
ENSG00000077080	0	0	0.98779	0	0	0	0	0	0	0	0	0	0	0	0	0
ENSG00000077092	32.1447	39.5921	13.5294	27.4385	12.8558	29.8036	105.284	105.342	4.62152	23.3347	9.2861	20.7937	12.1303	29.3442	18.4213	44.8214
ENSG00000077097	7789.14	5111.43	3305.84	3572.56	3157.42	3363.77	5954.6	6415.67	4950.64	7076.54	4325.51	5500.15	6962.04	5509.16	6063.45	5337.83
ENSG00000077147	9866.59	8167.63	3131.79	3475.63	2927.11	3378.77	5519.78	6001.11	10574.6	9465.76	10159.1	8753.96	11272.4	8331.72	10859.2	6308.1
ENSG00000077150	1488.24	3473.54	4074.45	3331.38	3320.01	3467.84	2555.01	2908.53	2727.27	1384.43	2715.31	1188.82	2664.16	1253.36	2531.09	2936.43
ENSG00000077152	1505.24	1204.92	1048.23	1390.07	1134.64	978.192	891.45	1190.83	1267.99	1531.5	1296.93	1312.36	1478.83	1418.78	1445.5	1335.6
ENSG00000077157	557.757	294.325	341.982	258.903	224.135	172.028	471.219	900.81	341.142	628.12	253.349	360.93	449.841	406.89	341.94	653.146
ENSG00000077232	7435.52	8546.63	4791.3	4872.83	3646.38	4131.75	7556.27	8543.12	6805.39	7020.83	6283.9	6398.39	7734.6	6253.86	6819.35	7945.52
ENSG00000077235	3766.55	2416.53	1893.49	1872.9	2281.48	1368.14	2417.81	3131.05	2772.95	3271.89	3036.06	2526.9	2686.01	2677.57	2970.04	2551.39
ENSG00000077238	560.113	644.586	482.657	538.638	433.539	427.011	555.47	684.071	977.869	544.792	947.379	537.817	890.114	495.235	825.067	587.025
ENSG00000077254	2148.83	1986.18	1736.51	1418.24	1493.25	1199.4	1841.42	2259.71	1538.38	2082.8	1545.77	1798.2	1794.95	1823.56	1720.97	2011.45
ENSG00000077264	367.942	336.631	89.6293	69.6749	67.3268	86.0698	373.265	407.09	480.215	335.205	429.585	413.247	506.354	322.965	468.902	355.748
ENSG00000077274	123.112	89.1683	17.777	27.9705	15.7849	15.8926	201.064	152.573	62.944	143.095	66.2649	121.821	85.4167	128.407	81.5783	106.056
ENSG00000077279	0.685116	1.36831	5.21575	0.683662	0	0	1.33006	0	0.838064	1.01945	0	0	0	0	0	2.89956
ENSG00000077312	2561.1	1880.07	1688.62	1791.37	2226.43	1615.68	1729.55	2090.85	1575.56	2529.37	1780.74	2210.12	2011.15	2160.5	1787.59	2213.19
ENSG00000077327	0	0.607259	1.83984	1.18674	0	0	0	1.78117	0	0	0	0	0	0	1.91309	0.604693
ENSG00000077348	230.715	362.557	210.646	293.698	223.817	232.403	157.938	192.679	184.727	173.329	179.295	163.831	172.405	159.223	182.663	344.986
ENSG00000077380	4457.97	4497.92	2317.11	2570.27	2091.12	2039.31	5863.49	6983.51	3972.91	4525.4	3547.02	3704.67	6503.62	3697.67	4168.13	4392.24
ENSG00000077420	3.00388	1.00248	0	1.99889	1.97371	0.993845	2.91459	1.91891	0.984191	0	1.00431	0	2.87832	1.00401	2.98549	0.999105
ENSG00000077454	656.093	942.913	1037.52	949.398	825.839	751.964	763.29	682.129	1046.29	610.163	1274.07	460.298	925.905	467.935	919.936	966.429
ENSG00000077458	582.143	363.502	642.753	489.266	598.199	440.384	531.375	678.909	535.663	678.998	443.505	443.757	655.983	560.346	599.052	518.711
ENSG00000077463	215.332	251.995	280.262	243.456	254.059	239.354	199.996	196.037	239.844	228.177	342.011	197.9	240.324	196.241	236.554	230.874
ENSG00000077498	0	0	1.12739	0	0	1.13547	0	0	0	0	0	0	0	0	0.769584	0
ENSG00000077514	1462.69	1080.33	1625.78	1148.96	1125.14	732.629	693.78	815.974	563.103	1493.2	482.855	1198.18	748.943	1260.06	738.742	1352.28
ENSG00000077522	26.7921	48.1893	166.168	109.206	106.585	149.307	44.7207	62.3525	33.1606	2.82756	23.9676	12.4685	64.0952	35.7595	33.9957	19.997
ENSG00000077549	3268.33	5602.54	3419.13	3961.23	3315.51	3241.34	3964.62	4337.89	2337.08	3203.51	2544.14	2929.59	2401.79	2660.53	2525.62	6769.48
ENSG00000077585	524.239	505.088	254.002	349.592	239.096	295.37	674.788	777.877	567.051	438.914	623.416	450.641	727.132	407.386	675.938	490.559
ENSG00000077616	164.986	129.977	475.907	297.098	387.491	201.181	272.974	364.089	65.0066	201.262	54.068	189.431	107.82	166.806	114.694	253.727
ENSG00000077684	2526.02	1282.74	1168.19	1018.08	1041.54	909.494	820.017	842.245	1318.28	2609.82	1401.06	1916.55	1422.89	2141.71	1669.56	1636.75
ENSG00000077713	509.281	393.245	241.245	267.135	227.908	236.044	332.491	395.067	266.91	490.874	287.575	470.386	317.729	429.027	303.994	412.196
ENSG00000077721	1303.87	1256.78	783.071	859.797	788.977	724.368	901.557	980.615	906.239	1185.2	1120.48	1119.46	1132.6	1130.91	1216.82	1346.53
ENSG00000077782	3517.8	1661.1	1603.68	1602.57	1616.46	1398.63	2853.99	3044.13	3241	2932.13	2761.91	2554.2	3592.17	2572.16	2854.85	2077.96
ENSG00000077800	1.61965	0	0	1.34354	0	0	0.65297	4.64779	0.661244	5.50104	4.32404	1.63354	0.645102	1.6266	0	0
ENSG00000077935	0	0	0	0	0	0	0	0	0	0	0	0	0	0	0	0
ENSG00000077942	4258.58	3065.94	4575.04	4937.71	3530.49	2638.42	4570.29	5007.15	2861.7	3446.42	3108.08	3373.84	3054.44	3418.01	3083.81	4091.62
ENSG00000077943	13.803	6.9683	25.4084	1.72956	7.97789	4.39411	49.569	48.7819	4.89731	8.24703	3.34165	14.4037	8.07825	9.33627	26.4475	5.83702
ENSG00000077984	41.0709	41.1981	28.6222	21.0182	38.4816	35.8447	65.993	55.4237	71.0875	41.9032	62.2586	32.437	83.0076	45.3844	58.7049	32.4731
ENSG00000078018	473.346	475.806	471.207	405.734	275.248	189.589	1058.36	1453.08	152.129	355.88	161.602	301.637	210.939	318.284	174.105	683.813
ENSG00000078043	735.153	711.387	358.952	367.316	338.735	354.194	685.915	718.688	570.069	687.324	662.022	685.34	631.353	613.38	680.243	822.278
ENSG00000078053	1456.47	954.333	887.195	749.25	745.303	618.221	1199.9	1132.52	587.646	1543.98	579.825	1169.19	832.357	1228.4	822.592	1276.68
ENSG00000078061	1363.82	1375.74	1230.72	1052.25	1029.49	991.173	926.166	991.696	1430.72	1138.44	1345.83	1092.53	1385.54	997.928	1447	1344.48
ENSG00000078070	670.495	477.314	597.576	605.249	575.222	460.841	401.56	422.763	392.784	550.235	398.758	561.365	442.377	674.385	469.661	587.619
ENSG00000078081	166.461	110.879	128.707	138.548	83.1518	74.6639	267.696	299.204	119.591	192.869	149.318	125.169	160.18	157.413	149.486	185.196
ENSG00000078098	336.914	177.048	166.643	155.002	97.5231	60.6568	140.036	189.519	309.725	297.434	242.736	360.012	374.367	336.344	341.851	125.761
ENSG00000078114	199.815	57.62	179.216	68.6941	231.45	141.858	110.622	126.422	81.0271	143.729	106.617	113.682	88.0552	168.685	92.6367	93.991
ENSG00000078124	860.071	860.369	879.545	778.319	569.615	613.878	642.029	802.717	531.84	886.291	713.964	722.893	603.348	693.34	698.69	789.208
ENSG00000078140	2470.52	2916.81	2010.29	1912.7	1930.66	1768.72	2489.99	3049.5	1850.36	2498.81	1974.34	2286.51	2441.9	2208.11	2097.52	3520.33
ENSG00000078142	590.567	624.48	721.034	673.295	575.14	606.318	630.215	674.252	481.721	485.823	574.527	521.277	599.694	446.666	548.921	555.721
ENSG00000078177	2566.9	1594.13	582.418	582.659	513.105	588.655	1600.59	1808.29	2095.55	2429.37	1880.49	2153.78	2089.57	2170.87	2121.57	1338.01
ENSG00000078237	746.521	1814.87	407.448	593.586	451.407	711.892	1376.96	1632.82	1564.74	940.642	1651.94	770.021	1967.16	623.547	1639.8	1510.24
ENSG00000078246	2247.87	1418.95	790.592	783.905	902.973	839.616	1734.04	2019.1	1553.84	2296.95	1479.17	1794.98	1735.76	2025.27	1506.22	1662.58
ENSG00000078269	1647.87	3187.55	1898.63	1853.5	1342.24	1557.25	2105.69	2178.79	1955.9	1561.11	1908.87	1408.96	1606.44	1209.43	1812.09	3036.55
ENSG00000078295	81.0661	71.4209	72.7068	31.9306	11.3763	67.061	272.888	275.081	106.34	101.63	34.2856	103.892	96.7794	163.434	69.3335	86.8678
ENSG00000078304	3157.82	1907.84	902.809	973.983	1450.2	1397.74	3029.04	3645.76	2389.22	3237.43	2366.22	2651.31	3076.72	2854.84	2744.09	2064.43
ENSG00000078319	296.947	215.871	141.558	157.768	139.14	145.172	202.421	237.731	253.044	249.377	219.283	237.34	268.154	226.383	302.065	217.303
ENSG00000078328	28.9751	22.3751	26.2683	12.9919	7.88336	21.9681	54.3345	27.6565	47.4224	32.0602	29.3668	23.9692	52.5972	41.7473	77.1414	45.3734
ENSG00000078369	8399.33	7389.34	2406.82	2910.67	2668.56	2380.01	6411.5	7964.88	6184.71	7888.16	5389.09	6736.82	6215.66	6602.54	6182.55	8697.6
ENSG00000078399	317.144	426.317	239.305	255.288	272.32	237.608	453.38	513.266	293.148	250.949	330.633	225.229	419.103	242.941	322.768	430.362
ENSG00000078401	290.318	485.231	402.886	355.777	367.011	427.343	130.132	166.812	526.628	342.142	566.282	219.811	461.988	219.956	412.88	380.78
ENSG00000078403	1431.01	1615.39	1335.74	1197.88	1126.1	1054.08	1147.91	1373.9	663.27	1354.16	841.221	1054.58	992.786	1049.93	977.016	1768.95
ENSG00000078487	117.587	51.8672	75.3811	81.1489	78.8769	67.7946	60.4082	65.5505	101.806	113.601	93.1176	78.8028	140.361	70.0269	90.9562	59.063
ENSG00000078549	96.9779	57.2064	32.1032	40.7209	40.9906	64.395	258.196	302.172	46.6685	68.5363	84.349	62.915	83.1523	58.1502	89.9046	40.1959
ENSG00000078579	13.5623	5.20261	5.1233	1.48167	26.3743	1.47347	16.3918	12.3551	13.2357	15.0868	2.23267	2.99068	3.55102	3.72343	4.42464	1.47626
ENSG00000078589	2.0018	2.00394	5.9269	0.998952	1.97324	1.98661	1.94266	1.91914	7.8692	2.98114	4.0166	3.02056	0.975242	2.00637	8.34255	1.00049
ENSG00000078596	0	1.40085	0	1.96539	2.04856	4.12849	9.18656	3.99597	1.37648	0	2.7997	1.3971	3.97694	5.54869	5.7064	1.3713
ENSG00000078618	5480.08	5760.05	7547.09	5993.05	6623.88	6369.01	5006.92	5004.71	4371.75	5182.1	4430.49	4346.12	4619.65	4755.41	4950.97	5894.37
ENSG00000078668	3035.8	2430.88	1616.4	1790.61	1655.58	1637.82	2067.2	2380.61	2490.99	3268.9	2591.01	2882.4	3089.62	2905.98	2734.63	2577.96
ENSG00000078674	3693	1945.67	2392.64	2159.86	2718.77	2506.97	2069.46	1923.4	2466.8	4071.28	2152.89	3434.07	3213.54	3328.83	2955.97	1966.88
ENSG00000078687	493.861	348.636	176.91	132.681	172.352	153.984	427.539	314.789	563.012	463.161	336.536	608.823	687.436	584.889	357.799	315.04
ENSG00000078699	954.915	792.197	772.677	612.92	832.046	701.985	1723.55	1787.85	685.401	879.463	618.008	697.745	777.244	660.55	599.796	854.599
ENSG00000078725	133.664	56.7152	90.4291	80.3861	55.1818	34.1173	349.515	423.672	83.9744	124.832	96.5527	122.437	87.5683	103.381	102.506	66.7252
ENSG00000078747	2141.25	2454.32	954.59	1206.23	1227.08	1304.03	2923.38	3310.91	1929.62	2094.43	1737.55	1826.15	2085.4	1899.8	1971.05	2715.65
ENSG00000078795	8.23337	8.16693	9.29557	7.675	8.95534	5.03409	10.4932	2.90915	6.77735	6.50654	12.0639	13.922	7.08499	14.1491	12.8602	13.302
ENSG00000078804	1020.18	846.044	568.919	554.495	591.99	528.413	1265.95	1202.25	1090.21	1001.52	1059.74	789.871	1088.08	874.165	1243.25	787.978
ENSG00000078808	1085.45	1549.72	1226.35	1139.66	1066.48	1038.82	994.433	1010.61	836.168	862.368	1435.61	1274.92	1148.53	1045.82	1110.95	1166.3
ENSG00000078814	13.9738	36.3002	64.1355	48.1662	36.5323	48.5836	20.4167	15.0931	12.08	11.0418	13.4511	16.142	18.5725	17.5809	41.8654	17.5524
ENSG00000078898	0	0	0	0	0	0	0	0	0	0	0	0	0	0	0	0
ENSG00000078900	529.129	181.548	131.675	94.8361	86.539	86.2769	117.983	107.861	118.299	359.664	147.74	362.3	166.025	310.902	156.367	230.911
ENSG00000078902	582.132	653.378	195.031	407.934	208.775	262.377	580.871	603.043	480.67	411.764	633.142	504.6	490.708	364.377	569.83	634.405
ENSG00000078967	529.697	828.774	354.789	396.087	382.488	322.204	823.206	1031.41	486.776	566.968	481.299	483.142	489.045	508.465	488.006	851.021
ENSG00000079101	15.1762	9.32849	25.1481	15.5622	28.072	7.9704	110.71	147.895	3.39396	12.2025	4.7845	30.2005	13.9162	6.81833	8.05163	18.9357
ENSG00000079102	3.45218	11.9208	0.851774	0	1.83268	2.73573	0	1.78253	1.76052	7.37424	17.7982	5.343	11.0464	6.74919	5.62558	6.89029
ENSG00000079112	0	0	1.84697	5.28949	0	0.489742	0	2.51484	0.613757	0	0.991113	0	0	2.63184	0	0
ENSG00000079134	1255.69	756.154	1702.73	1165.76	1414.82	1219.04	622.334	662.482	914.813	1191.48	807.356	883.289	1079.77	971.626	897.878	672.745
ENSG00000079150	445.982	293.418	527.377	500.891	516.207	412.813	679.981	825.579	251.06	355.065	247.084	415.907	456.328	337.516	362.028	328.745
ENSG00000079156	490.904	572.546	288.295	295.044	391.107	281.884	623.593	713.982	301.409	433.317	313.182	452.366	380.005	387.842	449.971	666.434
ENSG00000079215	815.809	1130.17	1496.01	1088.58	2799.08	1650.65	4288.6	5075.22	401.558	869.503	295.011	742.473	598.26	675.787	444.882	1773.56
ENSG00000079246	15725	15597.5	9958.48	11232.1	10001.3	9001.51	11391.6	14166.6	11963.7	16257.8	11228.6	14624.8	14189	14632.4	12863.8	16822.7
ENSG00000079257	0	0	0	0	0	0	0	0	0	0	0	0	0	0	0	0
ENSG00000079263	210.401	1003.69	876.163	1042.78	304.817	483.976	1103.64	1149.52	308.761	234.183	348.264	234.645	403.933	187.522	287.82	763.312
ENSG00000079277	135.896	59.887	134.495	138.539	82.5949	79.8314	90.2569	129.688	128.937	120.587	154.465	132.793	115.741	111.906	112.433	48.6172
ENSG00000079308	3867.2	2578.82	1155.26	1127.33	1205.88	1050.04	2143.3	2301.52	2167.76	3488.08	1982.14	3049.88	1756.44	2920.34	2067.09	3019.64
ENSG00000079313	727.336	686.688	575.579	723.987	593.63	701.33	400.479	396.043	591.386	557.181	704.984	522.653	503.739	502.261	484.949	804.29
ENSG00000079332	3228.25	3843.86	2163.32	2845.24	2141.59	2766.36	3254.06	4800.85	3448.34	3366.43	3627.46	2506.59	4248.25	2802.48	3655.85	4432.43
ENSG00000079335	318.277	356.457	242.162	237.258	193.593	187.897	315.012	280.075	282.014	270.437	267.531	274.579	236.394	241.066	259.058	365.055
ENSG00000079337	68.327	116.207	263.964	281.665	126.719	142.834	200.806	177.966	270.03	50.6082	280.35	34.8215	148.926	41.2056	161.012	60.0993
ENSG00000079385	25.2579	60.4773	30.4204	45.8254	13.197	25.9573	48.6137	42.7082	70.12	5.90155	87.4924	10.6035	91.1593	8.67202	50.9582	19.9495
ENSG00000079387	1768.81	1251.54	522.249	529.697	463.471	430.108	847.787	832.175	1109.05	1724.24	997.699	1593.01	1245.17	1506.01	1239.32	1417.52
ENSG00000079393	0.495918	1.17979	2.31349	0.994402	2.31377	0	2.35844	1.11802	0	0	0	1.6255	2.23061	0	0	0.973637
ENSG00000079432	3716.6	2314.29	1726.54	1699.86	1867.76	1418.25	3240.15	2859.83	2834.42	3454.77	3375.76	2989.46	3039.97	3168.47	3275.7	2473.93
ENSG00000079435	189.785	87.1134	81.1079	98.4789	98.1482	63.4171	86.1385	141.827	219.34	167.001	259.63	144.795	180.141	154.634	215.415	104.078
ENSG00000079459	6402.52	4773.93	2377.75	2493.99	2233.3	2104.07	2534.91	3158.25	5833.06	6253.39	6144.49	5483.22	6608.42	5873.66	6737.42	5038.23
ENSG00000079462	1508.41	737.642	617.977	713.138	862.144	569.317	934.822	1103	694.661	1396.43	786.451	1262.84	692.628	1245.98	930.405	978.663
ENSG00000079482	713.585	665.604	415.643	349.784	364.627	333.445	943.727	844.656	467.625	664.964	357.525	506.451	341.863	507.55	383.325	731.094
ENSG00000079557	0	0	0.987138	0	0.986286	0.993507	0	0	0	0	0	0	0	0	0	0
ENSG00000079616	3180	1649.23	2167.69	1814.76	2050.74	1647.09	1232.93	1335.17	2762.44	2883.87	2581.07	2488.95	2719.57	2605.81	2980.66	2117.2
ENSG00000079689	0	0	0	0	0	0	0	1.4534	0	0.669744	0	0	0	0	0	0
ENSG00000079691	548.921	376.821	375.34	333.072	499.706	321.066	413.422	513.254	320.112	528.969	340.691	457.781	361.916	497.566	371.072	446.874
ENSG00000079739	2221.34	1828.59	742.864	1013.48	770.368	752.588	1665.33	1764.37	1730.74	2183	1880.75	1968.92	1707.97	1845.37	1905.29	2037.68
ENSG00000079785	4477.32	6653.55	4614.61	4858.06	4108.16	4003.52	4073.15	4362.31	3724.62	4425.93	3791.39	3936.79	4036.64	3942.3	3980.9	6639.71
ENSG00000079805	2050.81	2005.37	1492.31	1577.99	1596.2	1258.31	1972.98	1976.24	1744.9	1702.23	1622.8	1515.34	1717.92	1486.15	1722.36	2056.18
ENSG00000079819	5980.48	8762.11	7372.31	5770.34	6206.26	6288.24	8691.36	10732.8	4450.39	6080.88	3591.99	4920.09	6395.44	5089.81	4208.94	9392.22
ENSG00000079841	20.0534	7.9944	8.83967	14.3861	15.2204	7.53525	22.6313	12.3272	7.75856	18.7631	10.1222	5.56303	14.7979	11.8231	6.14115	25.1644
ENSG00000079931	1876.83	1302.7	1142.27	1148.55	720.625	745.161	1949.38	2457.25	1570.4	2074.88	1291.13	1583.31	1735.73	1481.48	1543.63	1514.89
ENSG00000079950	1272	1309.6	819.833	912.103	635.395	580.382	1717.59	1757.24	797.483	1101.64	813.9	1048.9	952.253	938.105	983.853	1402.72
ENSG00000079974	1254.57	1050.81	1086.32	959.7	1010.75	895.6	1225.75	1330.4	1259.04	1072.62	1219.79	916.308	1321.34	882.046	1124.62	1084.7
ENSG00000079999	1140.72	1005.48	774.208	832.535	741.43	692.822	656.989	834.76	964.462	1173.77	1090.57	992.409	1122.78	1114.86	893.553	1291.91
ENSG00000080007	513.181	493.537	441.17	439.295	393.734	431.964	699.995	703.601	397.597	510.739	394.815	457.191	526.806	455.462	467.554	496.509
ENSG00000080031	146.944	99.3892	77.6545	101.245	69.0624	41.0901	182.381	190.602	127.516	100.133	71.7767	135.985	87.728	105.071	115.464	64.3771
ENSG00000080166	0	0	0.725496	0.733716	3.6087	0.729498	4.92754	1.41033	7.32354	1.45941	0	0	6.18362	0.736584	3.30808	0
ENSG00000080189	1731.12	1631.14	1353.14	1303.1	1494.47	1389.98	1355.61	1608.92	1522.69	1619.17	1582.27	1410.12	1408.77	1302.26	1516.76	1740.06
ENSG00000080200	1515.01	1269.23	1495.88	1425.12	1088.65	1146.28	1023.55	1110.06	1189.36	1278.01	1288.72	1068.77	1270.07	1037.58	1129.23	1146.16
ENSG00000080224	161.975	43.6687	32.1308	43.9418	45.7495	40.5427	116.022	143.204	94.8064	171.864	67.0509	139.863	136.46	154.939	134.003	61.521
ENSG00000080293	1.39121	0	2.32009	2.79579	1.34154	0	0.489303	1.72342	0	0.501241	0	2.22484	1.33096	2.81676	0	0
ENSG00000080298	414.913	405.206	362.253	331.806	279.572	265.259	542.709	604.227	384.409	366.806	326.525	385.17	371.511	372.291	390.155	407.17
ENSG00000080345	3392.56	3030	2700.72	2269.69	2430.52	2253.62	1942.27	1928.08	2191.97	3346.11	2122.95	2587.81	2128.57	2812.23	2309.27	3021.82
ENSG00000080371	787.478	1186.08	429.731	480.503	440.411	519.365	866.469	957.19	1088.09	812.024	943.421	689.19	1062.59	728.62	935.894	958.348
ENSG00000080493	55.4198	28.9036	27.8386	18.5209	15.3168	21.322	35.461	41.5068	21.1073	38.5469	17.6398	40.5767	16.8775	35.2224	36.7776	38.5447
ENSG00000080503	1939.32	1024.61	825.635	767.818	731.889	541.874	1303.02	1596.29	986.453	1661.58	1106.87	1655.8	1747.78	1403.56	1115.24	1806.64
ENSG00000080511	0	0	0	0	0	0	0	1.77644	4.51898	0.652293	3.94938	0	6.6071	0	3.64249	3.63897
ENSG00000080546	342.051	841.551	540.658	631.74	389.371	484.819	794.417	926.648	790.205	325.674	959.942	249.714	1026.5	356.127	911.425	605.62
ENSG00000080561	112.127	133.802	48.0942	56.2782	57.5186	69.9903	190.09	201.782	116.547	100.734	89.2374	69.6166	136.957	103.779	114.41	100.215
ENSG00000080572	3.96301	0	4.03877	0.962957	3.8645	2.96727	2.80496	0	0	1.70905	1.91104	2.67963	0.920291	3.64082	0	1.81409
ENSG00000080573	99.7593	79.2709	17.3738	12.6877	36.599	54.3417	19.9355	13.135	229.596	99.003	286.804	53.0844	205.548	61.7209	177.911	58.787
ENSG00000080603	4772.76	3089.96	661.763	817.676	519.343	661.079	1595.53	1499.07	4602.17	4122.87	4248.04	3492.52	3568.06	3573.4	4720.95	2947.88
ENSG00000080608	895.007	1394.77	1209.29	1285.04	1143.94	1077.75	858.254	963.402	919.817	912.516	908.055	667.547	1199.74	737.118	959.598	1328.54
ENSG00000080618	0	0	0.987789	0	0	0	0	0	0	0	0	0	0	0	0	0
ENSG00000080644	76.5292	65.0933	76.7104	142.325	39.7813	48.3732	345.725	252.432	135.893	49.2623	144.329	40.6106	77.2545	42.1479	65.1885	70.7818
ENSG00000080709	35.2148	49.1049	39.5351	54.6187	62.3962	48.7789	85.2568	91.5773	41.9126	40.2429	36.021	32.5566	44.312	27.1734	40.8366	34.4376
ENSG00000080802	493.338	590.862	297.432	354.655	280.041	326.714	452.264	455.777	410.095	468.147	435.557	454.799	427.762	406.457	435.509	542.224
ENSG00000080815	3145.28	1985.34	1515.77	1397.97	1416.77	1551.75	2105.14	2276.26	2613.57	2934.29	2628.88	2726.78	2846.48	2575.88	2739.05	2037.07
ENSG00000080819	1423.35	1639.58	992.74	992.107	1010.35	954.413	1189.02	1393.03	967.522	1318.28	1081.5	1022.47	1128.89	1178.68	1127.51	1531.75
ENSG00000080822	2749.05	2594.7	1901.51	1973.18	1807.04	1813.55	2549.06	2930.2	4111.65	2586.92	3926.13	2416.18	4055.06	2508.7	3934.72	2223.15
ENSG00000080823	253.844	206.426	310.075	224.018	256.72	300.151	244.296	209.189	413.41	232.442	506.374	206.142	438.19	252.077	355.22	218.696
ENSG00000080824	35331.7	28243.5	9660.87	10907.8	15090.7	16699.7	23312.4	25100	45015.4	37174.7	45658.2	28384.5	52302.8	30866.4	45068.8	26388
ENSG00000080839	1275.3	742.841	554.715	465.018	575.757	397.263	410.298	396.032	560.058	1691.08	393.899	1168.07	598.781	1130.07	558.437	1172.18
ENSG00000080845	2244.56	3147.49	1921.08	2019.84	2103.67	2303.75	3621.72	4046.02	2417.02	2095.62	2539.88	1728.86	2080.85	1676.53	2400.16	2914.3
ENSG00000080854	113.688	149.647	121.34	99.8253	90.5318	107.362	210.249	177.182	104.086	95.9602	93.9069	64.2212	99.3428	91.5718	80.1513	149.334
ENSG00000080910	9.52119	11.2888	10.3561	5.03783	7.00406	8.49287	1.96938	4.22032	7.40326	6.98874	2.74916	10.0671	10.2118	8.61662	6.41212	1.11309
ENSG00000080947	132.398	110.61	189.65	211.87	122.815	137.544	117.268	213.285	47.505	152.376	113.311	68.4226	85.1857	178.569	44.3283	91.7382
ENSG00000080986	4287.78	2448.86	2892.33	2948.1	3559.71	2983.64	1539.56	1924.02	2350	4188.65	2265.93	3463.72	2927.11	3711.94	2837.77	3028.85
ENSG00000081014	630.016	693.368	359.949	320.973	293.412	376.788	413.658	409.342	640.435	744.855	588.017	620.147	655.438	640.785	602.452	534.972
ENSG00000081019	807.199	845.288	533.266	513.096	492.948	445.168	1106.67	1401.87	749.038	796.368	776.678	702.181	1070.61	676.568	974.941	651.022
ENSG00000081026	1215.64	831.378	599.867	477.058	534.626	425.956	870.678	863.518	892.832	1199.05	789.951	1030.94	900.018	1043.04	767.984	975.423
ENSG00000081041	0	0	0	0	0	0	0	0	0	0	0	0	1.92265	0	0	0
ENSG00000081051	27.0671	96.2247	73.6772	113.87	33.8217	40.3812	45.7171	47.1364	33.7211	56.5492	32.2394	32.4561	34.9233	42.0487	44.2995	83.4087
ENSG00000081052	474.896	540.31	252.398	156.875	170.147	103.981	1155.84	1481.32	313.96	356.135	246.372	336.711	359.379	464.896	344.723	762.709
ENSG00000081059	12.2134	6.13318	5.16646	1.02578	1.99514	3.93737	10.2161	10.11	5.97278	8.06349	6.091	7.13181	6.73646	6.08844	3.01777	4.0419
ENSG00000081087	575.164	717.415	333.295	387.497	220.651	299.729	494.646	766.807	687.21	506.005	733.555	460.861	764.538	465.355	679.381	667.394
ENSG00000081138	14.3974	3.17374	8.06602	7.72407	16.7087	5.25667	18.0126	25.2565	7.50157	21.1359	11.9441	14.3239	7.53858	7.92271	22.3995	8.21033
ENSG00000081148	18.2691	13.1237	19.5204	12.0092	12.3009	11.8486	4.65474	6.85032	12.8565	20.4121	13.9561	16.4849	9.15928	23.024	20.226	13.4155
ENSG00000081154	4733.59	4973.35	2282.49	3028.43	1964.34	2387.35	3879.08	4396.61	5726.52	4689.13	5609.69	4012.73	6377.82	4058.45	6186.17	4676.08
ENSG00000081177	1389.69	944.77	719.473	682.231	677.171	577.966	876.2	1055.02	773.353	1343.8	791.261	1205.88	978.436	1220.39	945.003	924.555
ENSG00000081181	799.444	540.819	402.949	343.858	354.961	342.924	1138.75	1354.62	797.679	815.626	722.929	764.483	901.414	754.119	817.701	640.328
ENSG00000081189	288.503	49.1751	32.0859	47.5348	23.5917	19.8818	105.24	99.3435	25.2516	275.836	35.9512	73.0915	24.3097	291.245	247.763	81.2466
ENSG00000081237	34.2015	6.88808	17.8089	17.566	23.4955	16.4849	20.7694	18.3174	25.6346	70.4775	26.7764	15.809	29.9369	16.1182	19.6138	9.08937
ENSG00000081248	1.00104	0	0	0	0	0.993163	0.971665	0.960243	0	0	0	0	0.960549	0	0.99503	0
ENSG00000081277	3.74828	0	0	0	0	0	2.90838	0	0	0	0.751522	0	0	0	0	0
ENSG00000081307	1102.77	1074.24	894.566	856.901	686.194	870.716	1004.56	1214.89	878.194	1014.52	1071.93	838.789	1211.23	815.859	943.763	925.161
ENSG00000081320	640.887	830.279	460.664	547.285	373.079	390.104	964.772	1151.25	866.805	715.835	818.059	620.573	1159.51	684.631	970.003	710.53
ENSG00000081377	720.028	871.642	556.158	546.409	500.228	499.986	991.019	1050.19	610.877	620.129	603.284	667.652	666.201	659.925	582.49	823.028
ENSG00000081386	707.306	514.295	332.407	272.081	348.775	350.971	673.87	704.137	416.089	586.546	404.045	489.575	480.748	616.614	383.987	595.217
ENSG00000081479	15.5083	16.1717	13.8599	6.76318	1.45524	4.65497	4.27679	20.2099	1.80247	14.1057	15.2231	11.9127	1.41013	20.7408	22.7291	3.12699
ENSG00000081665	34.7337	22.2206	46.4484	33.802	49.4416	31.9064	35.557	36.9813	25.7868	29.0648	48.0244	44.8411	21.6467	22.8521	28.2741	35.4903
ENSG00000081692	418.3	471.618	231.494	220.048	187.05	196.833	192.885	185.653	288.723	323.321	358.155	277.752	277.463	329.589	368.731	421.111
ENSG00000081721	572.306	797.004	559.65	590.194	505.907	539.906	500.81	540.944	564.722	607.869	547.027	504.509	640.459	528.485	580.026	753.097
ENSG00000081760	977.494	1339.57	854.003	889.057	737.893	721.096	950.224	886.514	919.67	1052.37	898.694	852.377	834.075	770.553	941.549	1341.82
ENSG00000081791	1220	936.783	902.568	883.389	728.66	748.75	965.887	1066.95	1180.3	1229.83	945.755	1088.39	1255.24	1073.23	1117.97	910.669
ENSG00000081800	0	1.00342	1.52997	0.996358	2.36006	1.01004	0	0.847354	1.17521	1.04612	0	0	1.337	0	0.997704	0
ENSG00000081803	280.902	190.874	139.283	124.674	135.489	84.3314	185.966	163.531	140.943	223.135	153.611	228.476	175.957	227.486	213.949	197.591
ENSG00000081818	46.1824	1.90154	5.58498	3.74543	15.8616	14.1409	9.11794	22.2759	25.1693	56.7549	21.5134	44.5792	27.7576	31.0955	40.2155	24.1415
ENSG00000081842	897.235	149.38	83.9797	67.4656	94.191	79.4837	280.767	250.523	540.755	768.543	531.37	678.656	662.472	736.508	547.915	220.399
ENSG00000081853	125.909	11.1085	12.1936	9.30237	13.9241	8.00979	38.3405	17.6717	34.6942	88.3591	32.3898	80.5931	46.1121	56.616	46.6174	15.1465
ENSG00000081870	917.538	1118.76	855.899	978.865	863.602	764.797	846.017	954.4	689.268	977.682	764.047	844.259	835.843	850.788	800.523	1222.02
ENSG00000081913	398.394	410.35	256.772	197.464	189.518	216.975	335.882	368.831	128.001	292.304	145.767	224.215	139.552	254.878	173.814	533.254
ENSG00000081923	304.439	31.4956	0	4.03542	1.5918	6.40816	12.5661	28.6684	273.704	338.932	182.891	268.475	253.3	339.489	227.217	3.23473
ENSG00000081985	0	0	3.6208	1.85135	0	0.90271	3.53049	3.48885	0	0.903057	3.6375	0	12.9342	0	1.81923	0
ENSG00000082014	277.541	280.653	585.163	478.799	560.697	415.284	305.015	372.85	152.605	260.759	184.196	230.598	180.804	204.784	186.56	419.243
ENSG00000082068	1102.6	1184.21	939.921	963.544	982.438	759.663	1154.79	1469.22	650.553	992.225	850.571	1042.63	920.905	799.956	850.067	1086
ENSG00000082074	5.03935	4.70226	0.467065	0.944668	0	0	1.37809	2.55157	2.1867	4.13361	0.474779	0	1.69534	0	4.64651	4.53806
ENSG00000082126	33.401	28.836	27.6941	11.0212	14.5667	12.7682	3.86007	3.05302	34.9702	25.9165	83.634	20.6467	43.0159	28.7678	32.9757	19.1032
ENSG00000082146	755.586	719.302	393.697	367.494	391.42	310.417	552.787	457.73	521.745	695.283	511.164	589.628	637.706	582.563	637.747	723.745
ENSG00000082153	10752.2	14722.1	2397.82	3576.25	2657.33	3547.29	8156.71	10230	13114.5	10399.1	12252.3	8295.83	13812.7	8323.91	13375.2	13468.4
ENSG00000082175	0	0	0	0	0	0	0.971473	0	0	0	0	0	0	0	0	0
ENSG00000082196	23.7442	2.80211	35.3316	36.4099	39.1977	22.4051	21.2631	33.4204	19.6029	38.2019	18.9375	36.3839	15.8994	27.1549	24.3954	10.3693
ENSG00000082212	1497.8	2552.96	1402.11	1773.91	1265.01	1379.15	1916.36	2311.83	1403.11	1517.35	1371.02	1314.54	1546.5	1272.52	1574.65	2582.34
ENSG00000082213	1101.61	1263.8	557.922	685.914	631.384	602.039	1238.19	1461.44	1107.72	1259.94	1157.56	1061.09	1193.13	1049.31	1336.47	1305
ENSG00000082258	1468.76	1776.5	3010.68	1989.8	2186.1	1936.21	1260.04	1377.78	1476.11	1520.22	1176.83	1141.45	1417.14	1204.73	1181.17	1536.58
ENSG00000082269	580.771	836.127	562.108	532.72	552.345	446.767	710.583	772.97	514.728	558.969	455.002	539.747	514.688	462.888	485.143	702.902
ENSG00000082293	0	7.35345	4.1714	8.94583	10.4428	4.93448	4.46308	9.17059	8.45896	3.09474	6.61947	2.39146	5.6407	2.75212	3.34472	2.76438
ENSG00000082397	3192.34	4699.6	2512.61	2563.81	2069.56	2102.72	2978.55	2937.12	2019.32	3326.56	2254.16	2603.77	2490.66	3011.17	2212.41	5293.99
ENSG00000082438	423.744	962.04	468.909	471.555	299.657	318.178	466.809	531.058	631.142	442.083	644.673	364.066	608.329	399.863	621.499	718.914
ENSG00000082458	531.157	318.777	168.924	191.564	208.657	185.374	513.395	606.715	290.065	536.877	300.126	384.292	462.581	462.144	394.312	406.116
ENSG00000082482	45.8602	6.38397	0	7.27441	6.28605	4.52076	8.84127	12.2276	20.8869	12.6639	8.22503	20.7922	18.344	23.7431	14.489	5.46307
ENSG00000082497	2347.44	1474.49	590.539	637.311	431.632	539.714	859.122	899.694	989.348	2224.21	870.569	1783.87	1228.09	2129.9	1135.81	1874.25
ENSG00000082512	603.443	614.194	936.742	679.674	830.624	663.749	806.427	931.128	364.238	636.842	390.536	464.187	469.19	479.228	469.064	592.136
ENSG00000082515	790.87	805.207	616.214	792.987	724.209	692.516	724.106	908.894	585.962	731.251	654.092	627.415	770.571	659.779	663.236	739.666
ENSG00000082516	1444.16	1690.42	837.954	852.421	742.267	913.398	958.262	910.168	1499.69	1349.17	1429.83	1177.53	1290.87	1169.54	1439.29	1627.37
ENSG00000082556	15.5368	0	0	0	3.07687	10.9013	12.9105	52.8861	0	6.47618	0	15.1042	4.02346	3.43213	8.95214	10.3709
ENSG00000082641	14019.4	8773.86	3399.13	3537.35	3297.91	3311.84	10316.8	11163.2	13728.2	13992.5	11121.4	12153	16830.3	11790.6	13088.1	8848.61
ENSG00000082684	4.63063	3.28052	11.9001	4.53225	11.0102	2.19969	2.37477	3.89411	7.30807	4.69693	4.41647	2.65242	4.15468	9.94694	3.58642	2.98949
ENSG00000082701	3434.36	2207.78	1289.94	1385.45	1208.96	1240.48	2438.53	2778.37	2599.69	3280.15	2623.94	2736.33	2811.54	2945.5	2906.84	2310.65
ENSG00000082781	12653.5	8677.41	4681.61	5196.88	2818.17	2762.41	9557.29	10302.4	9716.65	10796.3	9265.58	10857.2	11178.8	9855.4	9857.63	9006.59
ENSG00000082805	5300.78	3463.97	1298.95	1116.9	1001.44	1052.75	3404.33	3457.55	3017.56	4830.24	2524.55	4100.6	3022.65	4514.09	3291.39	4135.33
ENSG00000082898	15570.9	13869.3	13425.9	11513.8	10932.6	10676.5	9473.75	10784.1	10678.1	16599.1	9840.52	13196	12066.1	14078.7	11956	13034.1
ENSG00000082929	0	0	0	0	0	0	0.971555	0	0	0	0	0	0	0	0	0
ENSG00000082996	920.23	473.196	500.19	512.211	373.706	377.664	650.228	809.817	604.702	879.756	639.457	926.804	795.311	875.99	709.686	549.846
ENSG00000083067	41.9414	12.3834	24.4378	12.9439	20.1788	9.0288	13.355	11.9136	18.4398	27.2969	12.2643	23.299	57.8803	26.2809	18.1238	9.09829
ENSG00000083093	667.282	447.459	497.001	397.2	502.641	474.002	297.235	280.178	531.783	728.763	479.703	561.864	540.712	566.423	569.577	388.157
ENSG00000083097	152.363	297.202	318.652	180.075	180.156	251.016	238.678	193.361	209.769	223.698	185.612	259.733	121.998	206.484	204.319	198.935
ENSG00000083099	1132.54	1125.09	410.251	406.821	414.841	494.213	677.006	780.886	917.021	997.879	973.645	915.728	1108.52	885.415	1057.12	940.554
ENSG00000083123	303.266	211.712	144.956	115.611	104.803	98.9284	249.381	244.188	195.288	290.191	229.689	254.314	242.921	236.371	258.596	241.326
ENSG00000083168	2600	1630.03	692.867	555.74	499.805	586.331	1686.6	1772.13	2230.42	2501.52	2072.36	2048.4	2295.53	2009.99	2292.77	1732.5
ENSG00000083223	809.119	828.626	731.138	707.867	764.105	623.086	1298.32	1620.75	1200.77	804.009	933.019	722.493	1235.71	634.279	809.101	732.36
ENSG00000083290	121.234	127.157	85.4894	93.1522	95.6578	159.076	232.453	497.772	72.8128	157.261	71.8046	147.278	116.057	115.23	107.156	212.127
ENSG00000083307	0	1.71548	1.09632	2.21502	0	1.32747	0	1.06302	1.10655	1.10643	0	2.24581	0	1.1179	0	2.73769
ENSG00000083312	6449.2	10681.5	3810.3	3974.31	3297.31	3708	8229.27	8604.2	7317.97	7195.59	7551.18	6442.92	7917.68	6341.81	7340.89	10778.9
ENSG00000083444	12688.5	6222.36	6035.12	5441.11	6680.84	4877.09	8193	8580.03	7894.89	11805.3	8227.94	9760.95	8028.49	9328.92	8108.19	7539.05
ENSG00000083454	57.6088	171.064	217.563	178.277	199.586	185.546	68.0114	100	54.4364	59.4853	57.2204	54.8544	47.92	44.5441	67.0122	126.544
ENSG00000083457	287.223	364.085	277.64	294.787	237.976	221.288	181.066	221.095	259.539	309.078	246.645	260.424	237.73	247.415	289.244	334.564
ENSG00000083520	1426.52	1951.17	865.312	999.653	658.489	814.029	1869.65	2043.45	1502.19	1471.89	1462.66	1288.69	1765.06	1246.23	1517.75	1534.62
ENSG00000083535	403.831	388.97	453.625	507.984	360.456	391.894	398.233	390.693	454.892	359.283	380.796	472.405	451.571	303.962	559.563	347.917
ENSG00000083544	297.982	266.354	228.051	148.855	228.487	206.357	230.442	229.433	221.861	334.546	194.851	292.018	276.182	288.271	232.251	294.038
ENSG00000083622	0	0	0	0	0	0	0	0	0	0	0	0	0	0	0	0
ENSG00000083635	292.268	410.78	251.84	334.65	291.035	310.902	262.256	259.082	298.006	327.932	305.22	239.622	329.182	242.774	303.432	390.177
ENSG00000083642	2125.38	1422.95	1144.23	1140.31	1313.61	1114.98	1473.91	1456.08	1276.29	2232.37	1109.94	1730.19	1476.27	1900.51	1349.78	1717.74
ENSG00000083720	1996.49	1900.83	1469.4	1363.92	1175.31	1125.97	1133.52	1310.96	1361.37	2049.67	1288.03	1810.04	1708.94	1747.84	1638.52	2300.81
ENSG00000083750	227.496	168.997	352.557	324.186	324.204	332.247	255.758	222.113	195.079	220.858	221.704	189.998	243.535	263.458	220.499	200.704
ENSG00000083782	5.42206	9.54687	7.68785	11.2447	17.0718	13.7641	34.0547	33.2199	0	1.72242	0.8687	1.74718	2.11727	1.8213	0.86077	10.3128
ENSG00000083799	922.07	2033.07	842.878	995.621	461.444	671.141	1216.75	1504.19	1653.49	942.983	1561.3	787.894	1500.25	827.55	1558.21	1396.01
ENSG00000083807	189.328	53.5488	44.6767	45.9825	46.9628	55.8314	64.8882	62.2226	134.43	159.272	149.469	106.904	161.426	121.154	166.414	74.9816
ENSG00000083812	190.996	145.628	35.0919	46.1044	46.1718	54.3512	67.0187	56.9183	269.404	180.302	362.723	147.057	241.233	115.832	259.319	127.27
ENSG00000083814	166.683	110.149	180.361	126.273	166.175	146.649	110.705	140.748	133.149	177.995	175.95	142.147	163.046	139.392	152.483	99.9583
ENSG00000083817	153.154	118.263	67.1525	58.951	73.0064	69.5495	86.439	87.2797	156.447	152.109	149.601	136.022	153.454	92.349	164.154	88.8747
ENSG00000083828	190.769	148.594	132.937	81.2081	99.5276	100.532	144.756	151.238	122.375	160.449	140.823	145.609	159.239	139.074	154.228	166.179
ENSG00000083838	212.309	56.6497	72.4714	69.4446	68.9734	53.5118	63.9385	49.2744	164.263	146.351	200.119	135.264	177.704	151.079	193.641	67.4203
ENSG00000083844	973.576	643.424	344.213	223.895	300.801	214.135	558.522	672.875	888.645	911.165	937.101	751.699	833.02	876.013	1033.14	601.623
ENSG00000083845	11506.2	9695.88	4637.04	7172.86	6000.5	5700.1	6859.04	8362.85	12502.1	9637.3	15479.2	10103	12222.7	8853.46	14009.2	9632.63
ENSG00000083857	8132.03	4649.89	8128.83	9206	8958.1	8671.96	5202.03	6689.05	4949.86	8637.72	6099.95	6162.33	4833.3	6221.53	6734.48	6792.38
ENSG00000083896	2713.69	2367.36	2460.41	2148.97	2012.11	2006.94	2195.1	2289.17	2285.59	2540.66	2217.84	2144.51	2747.53	2236.26	2268.93	2362.85
ENSG00000083937	1484.66	2130.3	775.87	1089.64	688.754	868.269	1787.97	1998.12	1269.94	1426.99	1407.25	1267.68	1430.33	1222.35	1388.47	1704.76
ENSG00000084070	736.245	911.253	575.478	499.091	457.053	492.095	1275.81	1217.64	953.015	841.786	946.644	632.83	1204.8	651.891	906.878	990.327
ENSG00000084072	1195.51	1270.11	875.203	1011.42	882.519	831.718	1293.56	1613.63	1070.5	1076.01	1187.81	928.2	1171.99	871.158	1145.71	1255.67
ENSG00000084073	1974.61	2515.74	1709.02	1885.61	1621.39	1876.9	1104.99	1216.37	2242.97	2037.7	2107.89	1730.82	2175.54	1661.47	2232.17	2215.11
ENSG00000084090	4713.98	5021.56	2617.94	2859.01	2362.49	2421.14	2723.92	3026.12	4064.94	4382.61	4405.21	4069.1	3956.81	4064.49	4505.88	5137.87
ENSG00000084092	1350.43	1281.08	854.184	1087.23	876.085	865.525	1432.48	1762.4	985.165	1132.65	1193.8	1196.5	1256.9	1048.31	1215.75	1176.11
ENSG00000084093	2068.76	2473.93	1015.57	1086.89	931.397	1129.55	3275.48	3282.99	3232.34	2183.47	2850.51	1686.94	2678.66	1882.88	3098.92	2214.13
ENSG00000084110	4.23694	2.85925	12.395	6.04033	3.32908	10.6337	0.625534	3.37273	0.909385	3.8412	12.0871	1.29752	2.47137	7.33424	4.43283	9.01652
ENSG00000084112	3438.87	3609.1	1065.36	959.551	579.789	859.957	3079.65	2842.34	2586.08	3344.59	2878.29	2696.39	2462.3	2588.06	2730.38	3663.26
ENSG00000084207	7764.83	10667.2	8784.55	12446.6	8970.67	8245.24	7193.78	7619.52	8089.37	6908.17	9440.03	6320.5	6985.06	6189.35	8612.14	10574.5
ENSG00000084234	14755.1	15142.8	12351	13065.6	9276.56	9706.06	17585.9	19950.6	14018.5	13323.2	14739.1	12148.4	17916.1	11897.3	15127.7	15517.2
ENSG00000084444	567.56	385.034	310.413	331.63	261.423	327.969	1005.83	982.677	641.24	465.061	679.487	427.631	609.787	440.719	656.446	401.188
ENSG00000084453	101.286	40.9821	56.1094	59.1048	44.7123	30.3995	87.3821	175.822	31.6832	84.072	30.0239	68.5836	76.1762	67.0224	42.5736	61.4251
ENSG00000084463	6612.6	6018.47	1924.68	2074.95	1958.48	2022.78	4314.93	5083.34	6650.84	6526.76	5767.18	5499.72	8394.75	5898.35	6912.14	5970.07
ENSG00000084623	5152.91	7517.7	3688.14	5166.45	3783.58	4010.62	5847.43	6723.09	6046.15	5160.41	6735.13	4647.02	6055.31	4533.48	6256.06	7680.91
ENSG00000084628	11.2953	1.91753	0.944886	0	5.66356	2.8515	5.57576	10.0966	9.41221	1.90203	3.84252	0	3.67171	2.8804	5.71124	5.73779
ENSG00000084636	812.89	5221.07	7810.87	5855.13	6829.02	5232.68	4863.39	4872.12	667.771	711.406	532.872	555.82	592.452	548.052	505.573	6572.28
ENSG00000084652	4097.96	4417.19	1937.56	1962.2	1830.63	1845.35	2795.05	2907.12	4117.24	3824.11	4059.17	3345.97	3731.24	3462.04	4047.25	4507.16
ENSG00000084674	1.79558	0.89818	0	0	0.885113	1.78143	0.87154	4.04012	0.881614	0.890723	0	0.901891	0	0	0	0.900868
ENSG00000084676	2229.35	1335.39	634.255	626.688	554.497	533.389	1426.07	1495.65	1402.36	2049	1244.32	1739.09	1477.18	1788.32	1543.5	1677.92
ENSG00000084693	2675.85	2119.04	882.007	1199.6	902.352	878.62	2223.27	2541.43	2259.39	2333.57	2407.6	2187.54	2303.26	2042.5	2300.63	2304.09
ENSG00000084710	490.493	681.24	423.431	385.923	247.107	188.408	434.976	477.172	462.092	516.732	512.058	387.523	401.004	497.651	473.764	618.513
ENSG00000084731	2012.5	1763.59	650.093	733.877	611.881	442.585	2923.82	2817.7	1073.59	1801.37	1139.11	1607.9	1325.41	1568.84	1448.55	2391.24
ENSG00000084733	3312.52	4501.41	2302.42	2978.66	2113.33	2506.32	4321.65	5132.18	2807.89	3496.81	2759.87	2821.76	3837.4	2894.72	3059.55	4322.79
ENSG00000084734	0	0	0	1.60939	1.91574	0	0.65322	3.13584	1.63283	0	0.598234	1.63745	2.09298	0	3.2368	0
ENSG00000084754	7883.88	9407.36	5558.48	6182.89	4993.41	4752.55	8040.66	8976.98	6543.88	7550.87	6621.17	6800.97	6939.88	6839.42	7246.5	9839.04
ENSG00000084764	442.616	739.158	652.083	687.965	488.187	457.84	1240.94	1358.94	502.591	451.115	476.819	391.482	550.249	356.115	516.304	686.631
ENSG00000084774	3307	3990.66	5849.38	4068.12	5534.32	4333.66	2583.99	2581.71	2542.4	3384.1	2618.47	2658.8	2199.62	2984.99	2700.39	4511.41
ENSG00000085063	6720.91	9074.94	6849.78	8484.32	5483.66	6639.36	7274.63	7867.36	8626.09	5904.39	8386.14	6329.26	9442.69	5213.48	8066.09	8067.49
ENSG00000085117	317.196	1433.28	569.157	920.805	402.302	672.518	1571.6	1649.81	1588.86	328.252	1589.49	356.742	1307.75	248.101	1119.01	1019.94
ENSG00000085185	547.115	706.015	255.444	360.386	288.117	285.806	767.945	737.034	544.895	533.157	460.671	466.561	454.969	540.554	586.519	790.014
ENSG00000085224	8833.96	6199.59	1349.35	1437.34	1577.01	1373.86	5287.4	5415.74	6318.38	8771.91	5075.87	7624.01	6464.73	7414.33	7046.06	5844.67
ENSG00000085231	687.157	761.279	630.988	657.423	559.498	567.771	572.607	635.889	580.359	656.653	532.332	477.696	718.875	588.146	583.574	775.555
ENSG00000085265	5.68022	0.987928	7.70121	2.83347	9.7842	7.00424	3.4382	3.84851	3.87841	4.55112	6.65419	8.26852	2.85307	6.49218	6.75449	6.00023
ENSG00000085274	560.407	450.18	359.728	367.771	306.525	362.295	352.571	455.125	470.536	600.468	472.766	514.771	597.311	491.068	550.822	414.486
ENSG00000085276	1009.57	580.647	470.812	445.738	316.637	298.563	341.722	443.267	591.338	959.124	480.088	766.825	570.457	871.703	555.795	542.273
ENSG00000085365	1872.74	1913.84	810.167	915.527	773.47	721.044	2186.96	2772.25	1339.12	1851.27	1293.19	1513.61	1612.25	1586.6	1598	1801.93
ENSG00000085377	1290.5	1387.73	884.677	959.411	948.899	878.666	1045.63	1316.35	1035.38	1286.12	1046.26	1085.86	1189.82	1107.58	1229.99	1370.82
ENSG00000085382	347.221	306.991	669.66	451.207	497.298	388.237	428.226	441.443	283.312	372.351	266.502	318.201	264.362	319.876	253.718	364.093
ENSG00000085415	3470.73	4048.42	1720.93	2256.72	1909.08	2199.86	2286.86	2616.63	3198.6	3256.37	3399.37	3065.94	3491.3	2820.66	3486.18	3890.29
ENSG00000085433	429.963	573.948	375.472	386.014	342.489	375.382	556.915	653.616	512.227	387.979	573.151	366.179	591.526	369.243	518.574	515.193
ENSG00000085449	1959.62	2729.65	2858.31	1965.74	2041.9	2109.41	2659.99	2977.66	1625.84	2037.76	1485.94	1643.54	1867.79	1640.05	1808.75	2512.42
ENSG00000085465	16.9633	38.0795	81.2593	72.7329	44.4223	49.6741	34.8269	54.7361	67.7554	15.5024	50.1778	12.8103	41.3898	17.0615	51.4067	21.977
ENSG00000085491	2003.35	1539.86	972.35	869.682	814.367	805.25	970.589	1041.54	1330.14	2055.84	1345.9	1787.9	1536.33	1793.61	1500.78	1485.64
ENSG00000085511	1705.05	1288.68	1947.56	1377.32	1819.28	1412.34	1614.95	2047.49	894.058	1883.67	891.507	1514.57	1217.24	1294.43	965.67	1504.82
ENSG00000085514	67.5257	25.9883	113.218	85.8661	95.6842	75.4388	23.9673	32.1244	40.853	55.5562	32.9615	51.8056	29.4478	77.0152	37.6866	29.1338
ENSG00000085552	569.074	296.785	710.022	526.54	671.593	380.924	337.067	336.518	212.129	465.962	206.457	426.162	179.938	473.829	248.323	405.034
ENSG00000085563	270.787	465.789	520.062	605.225	300.368	314.572	384.775	415.076	389.876	247.512	414.442	232.288	439.901	248.062	382.756	392.834
ENSG00000085644	321.846	369.352	157.249	213.603	194.12	211.921	207.794	225.29	380.394	309.703	502.479	278.387	388.196	297.599	448.412	291.873
ENSG00000085662	2341.23	3304.13	2598.53	2912.76	2314.71	1944.49	2424.72	2715.21	1759.98	2092.52	1870.41	2020.14	1501.33	2032.87	1970.1	3970.28
ENSG00000085719	3972.56	5379.82	1624.4	1962.12	1873.54	1977.19	4510.21	5526.44	3659.74	3426.37	3486.55	3538.96	3608.63	3316.18	3918.65	5281.63
ENSG00000085721	1157.03	1134.7	758.244	749.051	670.468	732.932	803.704	865.927	1548	1197.96	1505.05	1023	1546.34	1018.07	1474.9	981.543
ENSG00000085733	5153.97	6634.36	8014.49	6962.69	6011.96	6289.6	6646.22	6476.16	4678.31	4645.63	4403.98	3626.72	4959.51	3913.27	4811.59	6407.3
ENSG00000085741	173.297	12.3493	6.14733	9.77758	20.0119	13.2592	29.3644	25.5745	35.5271	102.507	42.7173	170.655	42.6121	116.146	47.3099	16.3285
ENSG00000085760	1252.79	1732.35	1555.34	1535.69	1390.4	1423.27	1381.08	1607.71	1336.55	1340.41	1263.49	1139	1593.36	1154.5	1360.06	1676.97
ENSG00000085788	1508.09	1465.9	751.524	613.434	630.989	611.866	1695.92	1835.27	1200.22	1686.74	1151.51	1381.03	1342.04	1276.77	1334.5	1496.45
ENSG00000085831	167.141	181.718	123.126	154.014	115.433	62.6209	221.38	276.821	64.9233	146.426	74.761	151.28	113.044	159.223	148.724	190.487
ENSG00000085832	2050.9	1718.47	952.207	998.363	944.336	868.088	2090.97	2279.11	1655.34	1930.27	1577.23	1722.8	1662.1	1695.54	1675.99	1752.03
ENSG00000085840	1098.94	744.992	521.912	482.067	506.109	344.669	329.514	363.648	430.366	1099.26	415.973	973.698	453.302	961.243	508.92	983.788
ENSG00000085871	308.857	343.254	601.787	706.194	550.39	601.296	346.65	391.747	225.958	290.428	296.196	258.115	244.966	264.274	276.395	375.675
ENSG00000085872	1231.91	1133.34	1035.82	884.035	961.561	790.491	834.894	936.446	1467.44	1032.67	1491.48	911.51	1176.18	936.064	1374.64	1034.03
ENSG00000085978	564.275	913.383	712.038	652.732	644.583	589.706	789.065	776.494	675.568	593.14	712.506	519.003	721.705	506.98	679.595	873.019
ENSG00000085982	1729.28	981.186	1248.84	1194.9	848.615	923.398	748.149	901.954	1315.23	1520.36	1224.83	1388.51	1589.15	1475.42	1630.92	1106.05
ENSG00000085998	1961.31	2536.57	3203.16	3147.06	2941.53	2332.61	2365.21	2743.5	2570.07	1809.64	2769.36	1647.57	2630.13	1589.77	2396.24	2341.78
ENSG00000085999	1042.35	610.117	1233.28	836.819	1288.68	716.3	611.944	672.084	694.709	1026.03	647.951	765.193	913.716	802.295	641.784	1076.5
ENSG00000086015	3345.06	2645.02	4067.37	2634.55	3493.92	2515.98	3508.45	3364.29	2267.77	3038.25	2318.31	2397.61	2154.92	2774.83	2373.34	3396.71
ENSG00000086061	9998.58	15219.5	8339.77	9767.23	7895.94	9387.47	8044.12	9151.07	13831.6	10865	14737.4	8483.83	16343.3	8720.48	14093	13609.1
ENSG00000086062	3631.45	3561.96	2233.37	2735.26	2259.58	2156.65	3935.77	4237.01	2662.31	3658.28	2852.62	3029.68	2653	3328.38	2963.58	4122.35
ENSG00000086065	2549.82	3155.65	1887.87	2432.32	1603.39	1849.81	3295.6	4094.31	3054.04	2478.48	3172.35	2227.03	3689.05	2131.63	3171.53	2607.58
ENSG00000086102	1512.18	2017.02	1770.42	1484.78	1409.22	1460.64	1572.89	1690.14	1484.93	1475.78	1484.2	1246.27	1576.63	1203.53	1375.1	1797.82
ENSG00000086159	6.77023	3.7113	6.10624	4.50637	10.3763	7.67062	3.81488	4.85021	2.27042	3.90541	10.2287	1.37172	6.7984	5.8982	8.21535	3.50237
ENSG00000086189	575.796	1108.16	705.772	763.158	695.594	724.299	592.009	723.262	724.33	549.507	894.132	583.406	823.229	452.927	874.501	831.547
ENSG00000086200	1193.53	1221.99	1067.06	763.535	949.274	655.088	753.05	762.127	916.863	1343.98	1044.31	1031.58	979.382	967.519	948.806	1256.18
ENSG00000086205	192.75	54.6902	135.559	140.063	88.5359	79.8769	166.61	173.17	77.8198	156.665	102.162	167.252	145.735	129.76	110.608	68.2351
ENSG00000086232	11399.2	6890.99	4441.55	4781.65	4850.93	4627.4	7203.83	8169.64	8859.59	11353	8609.61	10217.8	9688.04	10810.8	10380.1	7501.15
ENSG00000086288	5.62624	0.628487	10.0045	0	10.4787	1.99185	3.6149	3.53783	0	2.49415	0.629357	0.632212	0	0.629709	0	0
ENSG00000086289	1350.65	903.881	665.539	650.678	541.605	530.419	864.761	1026.24	1211.61	1261.9	1358.83	1071.2	1604.68	1184.94	1358.21	1042.09
ENSG00000086300	751.906	373.574	205.034	270.136	154.532	165.989	719.465	689.962	673.609	654.472	689.035	705.075	816.084	647.975	704.926	356.488
ENSG00000086475	2867.68	2794.52	1291.56	1534.67	1459.09	1221.46	1772.42	2040.32	1432.94	2838.65	1614.16	2314.88	1778.3	2445.61	2030.26	3148.31
ENSG00000086504	2041.81	1641.37	861.913	1268.49	1068.99	985.008	1574.3	1658.94	1839.28	1866.54	2257.23	1624.5	2094.88	1574.05	2053.04	1513.92
ENSG00000086506	0	0	0	0	0	0	0	0	0	0	0	0	0	0	0	0
ENSG00000086544	409.11	506.156	222.397	293.64	226.095	305.834	636.829	651.093	558.613	324.787	640.536	345.123	522.096	296.896	537.279	459.483
ENSG00000086548	0	1.00259	1.97582	1.99901	0	0	0.971575	0.959486	0	0	0	0	0.959499	0	0.995229	0
ENSG00000086570	10.4692	13.6245	8.06441	6.34068	5.4921	3.60225	12.3381	12.1976	23.1776	10.8081	30.055	1.82389	6.97385	4.54508	20.7564	7.82644
ENSG00000086589	1985.88	1616.8	1100.23	1060.56	1064.3	1185.77	1228.84	1318.1	2274.5	1848.06	2390.44	1601.44	2419.44	1574.63	2469.77	1480.33
ENSG00000086598	5681.3	5798.6	3023.48	3299.26	2752.91	2791.79	5042.68	6080.37	5248.55	5556.75	5302.27	4600.42	7233.39	4845.09	5276.74	5418.01
ENSG00000086619	221.074	190.846	195.991	171.457	148.207	159.676	600.842	795.702	373.104	170.373	308.747	231.722	517.52	186.131	355.249	236.2
ENSG00000086666	2156.57	1777.2	961.625	1135.96	941.098	937.944	2015.32	2583.73	1928.28	2158.03	2212.87	1901.21	2461.79	1837.37	2238.08	1682.06
ENSG00000086696	5.0921	33.0774	29.3712	27.1861	2.54149	1.92778	14.7038	19.9242	4.13258	4.97246	7.38001	5.16791	1.81239	1.85025	20.9338	3.33918
ENSG00000086712	562.283	818.05	495.328	414.414	400.514	387.735	505.065	503.01	555.335	542.364	589.623	444.525	673.713	440.976	554.835	751.474
ENSG00000086717	1.77268	0.621957	0	3.25492	4.66396	0	9.157	1.54305	1.22132	0.617014	3.00764	1.87648	10.2205	4.8306	0.951503	1.5894
ENSG00000086730	573.905	1324.06	1444.79	1558.37	909.735	992.283	1040.64	1360.97	500.125	521.18	580.75	472.67	624.138	571.538	559.269	1174.15
ENSG00000086758	14346.3	10486.2	13522.7	10496.3	12462.5	10581.3	9390.24	7830.34	9327.32	12224.8	9239.24	10070.3	8940.53	10943.7	9336.92	11077
ENSG00000086827	1890.33	2172.24	1290	1412.52	1160.1	1219.07	1294.41	1452.29	1139.52	1957.95	1121.7	1594.54	1232.16	1616.34	1280.87	2503.57
ENSG00000086848	979.679	1028.35	1423.72	1322.87	1372.18	1173.84	661.557	629.703	665.996	965.601	594.638	861.652	620.1	847.416	726.239	983.708
ENSG00000086967	14.014	0	1.97542	0	0.986673	2.98009	6.79993	1.91942	15.7371	3.97518	15.0616	19.13	23.0367	14.0454	13.9293	1.00069
ENSG00000086991	181.905	111.568	148.889	73.8888	99.0912	77.299	61.3081	71.6241	44.2598	129.655	61.0376	140.387	65.8875	122.204	88.9977	169.057
ENSG00000087008	135.114	244.539	160.36	155.505	197.766	159.398	245.902	279.959	125.689	109.496	129.777	87.4633	89.561	112.699	79.2024	254.738
ENSG00000087053	1960.15	3308.36	1462.06	1539.56	1222.6	1236.86	1582.87	1724.79	1553.87	2033.69	1380.65	1755.7	1435.35	1680	1840.65	3256.58
ENSG00000087074	1106.77	1338.15	775.959	969.18	714.929	1002.07	1459.47	1703.82	2683.51	1002.56	2654.18	831.096	2947.1	801.309	2269.34	811.975
ENSG00000087076	198.851	177.192	134.406	160.526	147.264	128.513	365.062	372.05	125.219	158.263	141.651	171.761	171.077	145.394	131.424	175.877
ENSG00000087077	1881.82	2085.58	1932.55	1879.37	1931.77	1714.48	1440.07	1479.96	1384.9	1575.16	1692.76	1574.56	1433.53	1531.27	1612.53	1971.78
ENSG00000087085	168.518	276.96	191.878	250.41	159.389	260.56	359.405	355.052	341.375	111.27	444.62	123.497	348.197	139.82	406.495	175.664
ENSG00000087086	32013.2	26870	11650	17125	17609.8	15756.1	48197.6	55573.9	24126.6	29579.9	28388.1	26069.5	25711.7	25479.6	28812.3	29651.2
ENSG00000087087	4130.24	4094.47	7284.16	5425.52	6274.7	5238.23	2547.22	2867.98	5523.62	3807.65	5169.32	2724.47	5429.64	3286.07	5254.12	3765.08
ENSG00000087088	2664.87	4223.3	2024.83	2676.21	2393.51	2635.18	3770.1	4135.78	4173.2	2408.43	4638.56	2015.55	4399.03	1969.64	4085.53	3956.72
ENSG00000087095	1064.93	905.672	540.394	536.28	570.277	644.774	736.446	808.598	1414.52	957.669	1464.34	832.318	1379.4	920.248	1252.47	797.436
ENSG00000087111	2387.41	1515.25	1039.13	1018.15	976.944	916.667	1572.87	1637.84	2121.75	2296.49	2235.46	1887.46	2033.61	1901.6	2138.58	1764.28
ENSG00000087116	396.853	280.071	342.396	277.247	380.177	293.258	769.284	848.629	273.642	261.604	371.993	291.318	282.504	297.192	301.607	295.289
ENSG00000087128	1.26421	0.632992	0	0	0	0	1.88061	0	1.86448	0	5.98759	1.9672	1.81588	1.9567	0	0
ENSG00000087152	4007.24	3250.29	1709.86	1877.79	1406.48	1547.17	2369.36	2546.56	4915.78	3664.22	4851.51	3400.08	4433.27	3240.68	4820.85	3372.42
ENSG00000087157	938.794	634.119	503.313	493.026	611.908	544.025	676.642	705.49	655.609	913.085	768.869	691.796	570.613	813.492	711.856	727.144
ENSG00000087191	6494.83	6550.48	4164.08	4495.68	4980.35	4434.88	4599.18	5200.87	6523.8	6598.08	6461.68	5613.12	7376.54	5586.09	6753.3	6475.42
ENSG00000087206	904.703	975.351	1422.49	1073.63	1166.92	1142.24	1227.52	1331.1	813.54	911.155	833.515	741.586	1182.86	871.161	896.225	1061.96
ENSG00000087237	1.88566	3.101	2.92067	1.8688	3.68963	3.94873	0.90239	2.22431	1.85214	1.10589	0	1.12169	1.80435	1.89245	0	0
ENSG00000087245	14763.9	5645.36	4925.69	5144.75	5468.43	4463.65	8370.64	9013.65	8533.91	12600.7	7692.01	11849.1	11384.8	9917.41	7918.49	7161.56
ENSG00000087250	0	0	0	0	0	0	0	0	0	0	0	0	0	0	0	0
ENSG00000087253	4.56974	14.2375	20.3278	3.58058	7.75753	8.58517	4.67367	0.658874	8.09556	4.36912	34.0283	39.1102	4.73131	38.8824	23.1141	5.70842
ENSG00000087258	595.028	410.827	111.667	168.044	167.517	131.098	634.358	654.432	307	696.039	300.165	449.507	392.303	650.426	374.597	486.956
ENSG00000087263	1185.68	1880.88	843.249	857.66	780.432	914.36	857.203	993.668	1369.67	1091.46	1425.89	984.713	1181.23	943.262	1280.98	1532.49
ENSG00000087266	581.426	793.863	1056.78	658.25	687.719	492.661	909.911	900.03	449.145	580.408	413.185	440.907	455.885	446.376	522.057	798.129
ENSG00000087269	820.741	1428.32	792.595	731.624	656.06	685.178	653.383	674.099	794.496	844.48	771.17	615.645	784.977	622.594	750.386	1520.13
ENSG00000087274	3799.96	3180.72	2235.16	1835	2276.9	1948.93	2971.95	2992.85	2438.71	3549.86	2276.22	2894.69	2674.74	3303.92	2523.85	3352.97
ENSG00000087299	1505.85	1597.39	616.482	691.518	721.809	746.981	1259.39	1423.15	990.31	1547.44	1167.33	1165.71	1108.1	1181.3	1125.1	1465.34
ENSG00000087301	489.218	212.815	223.295	162.134	161.131	131.562	378.042	489.266	281.668	541.013	216.363	453.082	343.943	353.109	334.61	254.636
ENSG00000087302	5222.64	5078.24	2830.36	3383.27	3150.76	3207.74	5821.22	6732.53	4220.17	5256.58	4617.87	4406.99	6210.48	4489.76	4807.22	5257.99
ENSG00000087303	113.915	40.9932	99.3918	145.544	81.6719	52.7135	269.277	262.235	42.1696	97.7124	32.5814	63.3598	52.9831	95.6493	73.7558	44.3002
ENSG00000087338	1545.91	1265.58	976.778	863.792	729.093	733.542	1349.38	1453.3	984.922	1480.46	1018.89	1269.67	1209.17	1301.98	1132.05	1228.77
ENSG00000087365	8156.29	9244.75	8834.22	9241.73	7799.28	6992.36	8112.96	8614.2	7592.55	7997.44	7665.01	6133.02	8879.75	6773.63	7633.51	9296.22
ENSG00000087448	1179.12	1583	900.922	771.05	600.687	664.115	1309.14	1513.46	1108.28	1292.54	1100.64	1147.78	1083.66	1184.15	1104.11	1505.14
ENSG00000087460	35558.5	26735	15502.6	18582	22531.4	19297.6	27672.1	29747.9	28930.4	31977.9	30371.5	29879.2	27702.1	28730.1	30971.2	31767.1
ENSG00000087470	3425.61	3114.4	2843.07	2470.69	2202.83	2060.11	3349.79	3741.59	3117.18	4115.82	2625.29	2732.9	4949.7	3025.82	3519.61	3369.26
ENSG00000087494	145.193	239.894	161.19	222.725	131.387	153.137	310.274	327.579	250.788	160.299	244.924	129.155	283.21	131.115	213.609	221.041
ENSG00000087495	43.7333	22.6595	13.201	17.5055	20.077	17.7055	57.2587	81.5304	36.0966	36.9059	42.8119	42.0085	44.6528	30.174	38.5147	28.2219
ENSG00000087502	2707.6	2327.92	1729.78	1770.18	1477.48	1466.37	2252.22	2794.42	2199.32	2793.46	2177.43	2284.97	3037.62	2359.71	2444.06	2168.91
ENSG00000087510	0	0	0.789251	0	0	0	6.36239	0	2.35866	0	0	0.805007	0	0.802041	0.795093	0.798674
ENSG00000087586	3829.46	3008.04	1896.89	2272.88	2966.18	3032.92	2208.25	2620.43	3004.67	3633.44	3088.7	3031.95	3400.29	3122.73	3630.66	3406.17
ENSG00000087589	13.0419	29.281	21.3808	36.1275	27.812	30.2196	41.9827	46.9545	25.0889	12.4291	39.1954	12.9205	34.7112	15.9146	30.1833	12.3663
ENSG00000087842	354.942	311.073	382.249	372.513	255.495	213.984	325.411	444.22	150.152	335.061	179.391	257.857	208.318	253.547	175.842	370.666
ENSG00000087884	270.177	257.682	237.475	306.92	237.244	193.737	463.098	523.524	205.082	218.412	228.663	207.451	262.021	192.877	272.699	266.119
ENSG00000087903	452.163	259.069	209.112	257.478	268.298	221.551	413.45	456.567	297.129	421.178	259.79	517.588	392.069	394.502	314.052	379.005
ENSG00000087995	1084.95	926.891	544.817	684.918	707.668	744.27	750.783	843.429	980.24	1074.68	1106.04	954.482	1022.92	917.995	1023.29	1013.72
ENSG00000088002	14.4652	2.52986	3.31973	3.8096	4.69835	2.84178	4.62324	12.7655	0	6.5521	5.81605	6.73703	5.2873	9.75567	7.89044	1.79453
ENSG00000088035	417.287	393.449	609.349	649.526	553.348	540.136	317.108	341.458	361.242	392.455	333.232	332.08	328.387	355.011	324.679	371.798
ENSG00000088038	2677.97	1095.22	928.247	1023.26	983.104	892.349	1374.92	1607.3	2003.06	2677.61	1997.52	1983.25	2313.25	1976.37	2043.11	1551.48
ENSG00000088053	174.109	329.368	261.97	311.202	208.454	202.145	147.531	127.627	93.4626	191.106	96.3772	130.202	61.0863	162.006	98.9887	404.688
ENSG00000088179	1468.22	881.368	812.819	529.755	723.217	512.577	1328.77	1514.54	806.27	1314.23	689.429	992.164	1165.46	1047.82	1119.03	1069.67
ENSG00000088205	4720.24	6956.09	2035.16	2571.95	1899.34	2475.65	5096.32	6026.03	5384.32	5056.98	4385.51	3997.53	6148.37	4136.57	4931.17	7199.02
ENSG00000088247	6785.29	6111.12	2750.72	3031.65	2781.07	2593.72	3308.4	3619.49	4739.28	5659.66	5113.9	5369.7	4958.49	5495.09	5318.66	6118.98
ENSG00000088256	1695.39	1784.75	548.987	757.892	571.675	693.552	1297.34	1187.16	1619.01	1450.45	1418.32	1275.25	1218.14	1376.19	1418.37	2218.7
ENSG00000088280	931.583	426.941	765.422	547.892	814.341	555.867	857.487	896.892	497.861	862.41	515.765	756.926	466.605	762.975	473.142	602.406
ENSG00000088298	1008.93	1016.48	994.719	1151.71	934.724	862.961	1335.86	1522.07	883.254	905.321	1015.88	864.647	918.843	788.11	1039.34	1060.43
ENSG00000088305	710.517	516.144	951.719	816.836	906.407	654.845	623.28	662.91	410.241	691.212	400.96	545.597	461.671	592.801	465.863	691.329
ENSG00000088320	0	0	0	0	0	0	0	0	0	0	0	0	0	0	0	0
ENSG00000088325	8456.72	7580.01	5329.12	5669.55	6120.4	5768.42	5398.99	5967.53	5699.09	8397.75	5680.69	7077.36	6603.12	7630.11	7053.27	8851.49
ENSG00000088340	196.507	79.2218	313.514	305.429	259.667	219.891	267.457	276.457	126.495	221.145	155.955	198.318	185.678	222.338	169.94	109.182
ENSG00000088356	528.588	1063.77	561.861	782.543	722.185	720.558	555.479	624.051	569.003	480.433	565.28	458.847	435.095	430.923	573.059	1101.07
ENSG00000088367	2261.87	1999.19	1358.35	1167.7	1351.25	1066.72	3086.18	3248.66	1334.33	2496.03	1369.73	1922.53	1362.16	2018.89	1655.02	2372.01
ENSG00000088386	4.99429	4.48251	7.86486	4.37406	5.47026	10.8227	6.01776	3.58414	2.93324	2.55917	8.77201	2.9633	1.33391	12.2934	2.09705	4.07216
ENSG00000088387	951.021	724.373	464.415	344.346	238.446	376.811	707.402	750.34	754.779	599.099	470.81	555.147	679.926	459.39	611.527	419.763
ENSG00000088448	1222.78	661.233	1136.78	749.774	885.884	803.046	1077.72	1360.62	878.524	1306.37	577.054	860.012	621.297	1059.43	736.562	557.436
ENSG00000088451	447.712	483.329	442.697	421.41	339.738	349.949	527.471	683.251	526.241	427.301	535.822	389.776	632.646	379.321	509.189	388.303
ENSG00000088538	284.22	309.427	630.168	436.394	409.411	279.989	304.069	312.09	141.529	237.334	119.474	216.204	139.305	211.474	150.219	422.453
ENSG00000088543	535.989	376.182	299.117	316.323	337.579	227.122	487.006	545.392	302.747	503.802	323.745	416.398	360.636	425.619	356.654	487.717
ENSG00000088682	1098.81	1005.31	733.196	756.989	772.437	640.445	1139.24	1318.02	971.206	1150	992.662	914.521	1119.46	925.152	996.536	1118.23
ENSG00000088726	19.8425	42.6717	34.2522	43.6567	19.7208	74.4051	23.6111	73.6465	65.5079	14.7097	114.792	14.0791	90.422	11.4702	79.8364	40.0362
ENSG00000088727	120.245	129.399	62.312	91.0473	70.1211	84.1258	97.1829	112.895	136.427	113.304	176.553	109.966	155.227	92.3108	133.103	101.178
ENSG00000088756	1366.42	359.92	198.956	166.37	161.718	153.018	347.896	508.419	314.444	1052.06	361.106	1196.32	391.053	1088.55	435.63	521.176
ENSG00000088766	462.37	531.774	405.695	367.27	478.666	395.22	451.531	509.522	422.597	398.522	481.887	406.035	465.264	393.749	442.645	536.335
ENSG00000088782	0	0	0	0	0	0	0	0	0	0	0	0	0	0	0	0
ENSG00000088808	312.622	391.958	336.279	220.612	313.097	250.248	334.061	410.08	431.276	259.196	400.754	187.705	324.086	236.719	342.283	292.146
ENSG00000088812	2720.54	2065.55	855.448	874.696	1108.66	1125.08	2375.46	2532.63	2189.61	2656.38	2065.9	2084.14	2321.38	2039.82	2377.02	2230.49
ENSG00000088826	451.789	410.397	236.296	252.203	344.671	312.317	563.642	575.349	544.466	313.649	643.3	338.416	572.248	333.757	507.999	334.402
ENSG00000088827	12.5815	1.85433	8.04946	9.24566	11.2371	9.54109	2.69806	7.92058	9.35849	9.19465	12.6212	6.51846	10.9644	6.4964	16.5781	2.78521
ENSG00000088832	5514	8405.74	2913.64	3541.33	3209.52	3503.66	6094.25	6676.45	5358.37	5461.31	5799.08	5248.88	5797.23	4991.47	5764.93	8353.99
ENSG00000088833	2383.34	2687.44	1484.39	1655.81	1639.62	1462.13	1919.6	2202.05	2035.74	2478.09	2129.19	1902.63	2297.7	2024.1	2195.03	2673.68
ENSG00000088836	341.545	448.344	382	403.787	490.35	520.162	361.593	387.318	384.834	317.094	520.343	216.886	504.249	243.053	507.264	329.563
ENSG00000088854	760.304	396.907	317.494	236.281	356.086	315.218	582.834	644.967	528.912	580.006	521.181	522.139	532.904	505.361	546.222	404.125
ENSG00000088876	360.449	396.588	349.255	262.739	383.833	353.11	298.445	389.027	378.593	328.084	310.85	232.295	417.86	236.315	314.306	356.677
ENSG00000088881	20.5805	14.3061	18.1797	28.9476	27.7503	42.0204	37.9277	106.441	35.0787	48.5524	35.8368	62.2949	34.0569	53.9013	83.6299	16.633
ENSG00000088882	0	0	0	0	1.97539	0.994751	2.91689	4.80037	2.95551	0	0	0	1.91999	0	0.996003	0.999214
ENSG00000088888	2765.08	1973.38	1309.42	988.404	1600.57	1462.67	2276.94	2194.21	1655.71	2544.16	1693.08	1976.45	1500.05	2170.36	1737.88	2130.7
ENSG00000088899	986.032	644.598	437.325	420.001	573.183	491.612	753.814	796.449	704.071	939.915	856.034	841.84	794.753	822.643	839.583	757.106
ENSG00000088926	0	0	0	0	1.807	0.423847	0	0	1.43738	0	0	0	0	0	0	0
ENSG00000088930	5560.13	5455.46	2094.71	2610.3	2402.27	2674	4294.17	5021.26	4269.55	5483.56	4149.59	4894.34	5370.36	4885.74	4744.48	5450.89
ENSG00000088970	354.373	306.964	219.985	241.512	313.496	287.474	598.037	754.257	239.156	397.638	272.714	330.553	363.317	270.607	317.368	322.387
ENSG00000088986	4622.1	7110.73	4030.59	5311.68	4056.55	4318.54	4328.1	4901.54	9620.12	4543.74	10065.4	3839.53	10928.9	3839.77	10010.2	5576.3
ENSG00000088992	22.9271	6.2789	12.4881	13.0653	7.51948	8.23088	17.2005	10.5171	11.0442	18.5238	26.4729	19.4033	14.7626	16.5614	35.1487	16.7453
ENSG00000089006	2868.13	2585.83	1695.37	1520.4	2721.48	2507.46	2016.56	2279.68	2710.64	2969.52	2883.66	2541.15	2954.04	2531.02	2920.34	2605.21
ENSG00000089009	24090.5	27830.7	13648.9	18535.5	13869.8	14521.8	25304.3	29942.3	26020.1	23262.7	29911.1	20814.4	37572.4	20495.2	29646.7	25028.6
ENSG00000089012	0	0	1.6033	3.25521	1.14768	0.578185	0	0	1.32363	0	0	0	0	0	0	0
ENSG00000089022	781.306	778.933	734.563	621.261	638.781	587.47	521.188	584.197	687.559	699.395	702.16	567.335	630.793	597.131	664.902	878.743
ENSG00000089041	104.266	11.3976	17.9336	8.84212	14.9493	17.0141	16.3983	22.119	40.3161	82.5154	35.4721	99.0674	92.8866	79.6678	47.2303	8.21868
ENSG00000089048	756.537	1094.72	735.647	673.276	834.613	1002.71	848.858	788.433	961.499	906.791	904.523	683.103	1027.94	649.462	847.326	943.314
ENSG00000089050	1079.06	966.379	272.191	313.458	433.826	371.233	786.871	1150.37	837.663	1245.37	759.636	1138.48	936.809	1049.28	944.559	1152.48
ENSG00000089053	2126.12	2283.46	2041.37	1765.83	1739.98	1555.53	1792.62	1996.54	1900.85	2128.82	1763.67	1802.63	1683.29	1796.2	1831.18	2388.38
ENSG00000089057	1438.87	1033.28	795.957	652.393	895.015	758.963	991.293	982.27	937.044	1204.08	960.576	1040.66	930.936	1134.89	1038.18	1139.3
ENSG00000089060	441.558	776.615	938.268	874.374	769.326	708.81	836.601	978.597	512.811	455.04	480.333	418.589	488.929	390.94	401.831	680.694
ENSG00000089063	2226.1	1958.05	935.612	1158.3	1238.56	1280.88	1723.14	2118.78	1619.16	2182.31	1791.96	1975.15	1984.68	1910.89	1912.37	2016.43
ENSG00000089091	99.9202	59.1758	152.145	141.136	227.424	180.538	76.8663	76.34	68.9398	97.4943	76.5008	75.8783	84.037	94.427	90.5095	86.2582
ENSG00000089094	992.091	935.831	508.606	518.92	475.823	539.983	743.522	794.261	748.516	833.636	909.24	764.744	816.061	757.678	779.542	985.471
ENSG00000089101	5.66097	0.707093	0.633262	0	3.20277	8.07928	5.47895	7.25022	0	1.22037	11.0345	1.42243	9.90686	1.41682	2.80655	2.93916
ENSG00000089116	13.0128	36.0771	16.7884	28.9743	12.8254	15.8959	59.2463	63.3096	13.7736	6.95838	27.1087	11.0811	27.8183	11.04	31.8358	21.9799
ENSG00000089123	170.086	141.061	87.0472	76.2878	76.6701	81.6727	172.377	150.783	117.49	173.676	136.328	169.089	155.082	166.548	142.906	163.432
ENSG00000089127	83.4082	21.5382	60.2542	57.659	25.8678	12.5903	64.4595	70.9658	20.6391	62.6585	19.558	60.0016	39.9264	59.3353	45.6025	46.8231
ENSG00000089154	5362.5	6341.04	7605.58	5935.2	6918.23	5135.18	3962.98	3768.73	4486.69	4411.21	4577.28	3143.33	3208.38	3662.77	4547.53	5625.05
ENSG00000089157	52731.4	58350.9	21494.7	28865.6	23583.6	22406.4	49079.5	61926.1	54359.2	47885.2	60070.7	44455.9	72748.9	41559.5	60646.2	55212.5
ENSG00000089159	4186.09	6012.63	3098.02	3145.5	2722.88	2845.24	5486.66	5687.75	4553.51	3999.9	4728.22	3408.52	4032.37	3364.68	4304.91	5477.45
ENSG00000089163	23.574	47.6633	23.8991	35.7514	42.2412	25.6037	61.0783	113.588	38.1686	14.4917	48.1831	30.6797	27.5151	10.5299	30.3618	42.8799
ENSG00000089169	7.85682	9.94096	0.929754	2.25906	0	0.843928	1.77809	9.06616	2.62417	5.35695	2.28166	6.57263	2.25945	1.84994	0.884362	3.16348
ENSG00000089177	553.692	441.698	357.499	282.703	382.731	319.312	409.495	434.511	398.279	542.831	435.113	442.8	530.1	410.531	409.337	430.668
ENSG00000089195	786.595	1079.61	530.83	604.9	676.883	764.387	490.538	560.634	1089.54	822.4	1138.68	659.773	1219.08	644.244	1043.19	884.578
ENSG00000089199	47.6163	65.047	33.9557	35.1534	56.7034	58.344	114.021	116.356	60.3273	47.5267	60.3354	28.9593	105.491	29.8449	59.3977	64.1715
ENSG00000089220	3489.49	3842.41	2537.39	2763.53	2560.28	2201.58	3311.86	3897.05	2799.12	3407.74	3056.43	3010.61	3372.02	2916.35	3140.98	4462.94
ENSG00000089225	27.6758	8.33579	8.42563	9.23201	22.5456	6.7997	31.8914	37.8255	8.48474	31.9645	5.90586	24.6412	3.65014	20.8782	11.5906	14.1024
ENSG00000089234	534.291	781.796	424.674	497.158	406.085	448.509	686.182	827.973	531.468	586.989	559.279	489.295	647.171	466.369	573.406	663.526
ENSG00000089248	6790.56	5484.37	6709.78	6638.97	5685.15	4978.63	5848.9	6973.44	5087.35	6713.89	5492.63	5502.98	7438.34	5414.58	5635.72	6094.33
ENSG00000089250	701.194	66.3709	45.5046	34.1148	68.2113	59.9993	382.276	361.047	822.668	479.505	795.577	464.88	660.652	474.057	683.015	73.6671
ENSG00000089280	9878.28	9934.55	12812.3	10615.3	11149.5	9843.56	5210.08	5262.98	9168.85	9372.19	9595.65	6883.38	10709.9	8000.63	9832.49	10377
ENSG00000089289	1675.02	1504.45	690.123	950.867	747.083	865.731	1973.82	2286.84	1448.61	1455.62	1427.65	1425.39	1898.83	1370.13	1624.47	1496.43
ENSG00000089327	2319.71	2765.84	3401.71	3421.34	3736.96	3341.57	3608.95	3838.17	2196.3	2328.02	2184.7	2023.13	2671.77	1923.64	2307.92	2740.82
ENSG00000089335	1066.73	571.339	767.131	596.061	792.738	690.672	641.179	658.493	871.435	1072.29	777.162	951.433	1030.21	921.797	912.056	565.404
ENSG00000089351	1465.46	960.505	670.292	693.529	708.266	648.667	1604.04	1623.42	964.388	1067.45	1058.93	1197.89	912.651	1079.77	1126.93	920.965
ENSG00000089356	1.4892	0	0	1.62629	0	0	0	0	1.62483	1.62496	1.10174	1.6561	3.0499	0	4.43832	0
ENSG00000089472	583.946	116.277	209.941	194.104	67.9169	38.7521	1051.35	1247.44	334.239	509.106	324.819	654.981	500.548	584.976	392.869	161.621
ENSG00000089486	1083.32	1957.16	624.589	847.43	521.764	682.181	1000.27	1013.37	1596.75	929.556	1699.27	984.631	1190.56	977.143	1671.12	1767.56
ENSG00000089505	131.267	85.1187	47.5294	33.5945	51.931	25.8749	56.654	52.4778	65.7332	93.793	69.8095	131.952	68.9876	118.857	73.218	83.6959
ENSG00000089558	2.00434	4.01251	1.97781	2.00036	0.987788	2.98357	2.91775	2.88262	0	0.994923	1.00527	3.02392	4.71945	4.01754	3.98451	1.00206
ENSG00000089597	20308.8	18186.2	17466.6	17213.9	13321.9	12548.7	15273.4	16092.1	16793.7	18364.1	16484.3	15932.1	16334.1	16062.5	17454.6	20580.3
ENSG00000089639	217.81	185.759	61.9873	107.22	74.8036	106.437	195.989	221.873	193.696	132.008	154.887	108.083	152.47	170.417	162.691	199.52
ENSG00000089682	313.869	348.268	283.507	273.23	298.089	195.691	307.355	406.36	233.136	254.452	212.692	199.075	310.965	281.783	217.755	306.992
ENSG00000089685	7894.5	4518.5	2743.69	3270.91	3472.04	3102.15	2844.5	3649.53	6418	7234.89	6627.23	6443.86	7159.26	6787.12	7580.2	5698.76
ENSG00000089692	111.392	49.8657	115.802	43.7362	101.09	78.7461	29.1743	21.0614	123.064	108.354	170.182	71.5646	64.2999	66.3017	108.661	34.8839
ENSG00000089693	8655.24	6001.72	3130.61	3694.89	3701.74	3441.77	5404.76	5685.72	9504.07	8349.57	10797.8	7030.29	10528.4	7136.83	9794.02	5926.53
ENSG00000089723	347.006	168.188	55.9234	71.4457	87.2239	79.9198	330.973	326.049	171.935	324.407	168.558	271.987	175.979	275.397	177.892	177.997
ENSG00000089737	2701.76	2423.93	1233.08	1209.48	1240.46	1622.4	2782.91	3340.53	3502.7	2637.45	3238.59	2339.42	4125.67	2505.97	3149.68	2278.67
ENSG00000089775	1039.15	479.853	396.177	381.877	468.965	424.646	756.159	985.747	586.201	954.647	557.383	770.223	650.586	892.184	748.858	553.585
ENSG00000089818	1245.25	1803	732.079	729.192	654.529	671.912	1518.25	1881.29	1687.91	1510.8	1702.44	1075.92	2221.17	1383.68	2063.18	1659.12
ENSG00000089820	39.0739	20.1927	38.7895	27.6264	36.1174	37.0914	22.9062	23.3018	46.0017	31.0104	33.9889	46.0903	33.5695	38.8555	29.8544	4.89776
ENSG00000089847	171.736	38.5163	81.9867	47.4908	69.9297	47.221	275.625	214.032	75.2882	133.417	105.63	176.886	142.189	150.535	126.383	22.4974
ENSG00000089876	1364.77	922.366	642.924	681.421	591.449	638.575	881.836	940.376	1320.87	1327.44	1411.11	1347.8	1449.13	1139.33	1473.28	826.037
ENSG00000089902	929.544	1195.45	389.457	336.206	460.006	426.914	1382.29	1100.82	975.671	1293.09	869.2	1226.5	1303.69	722.435	1167.42	957.807
ENSG00000089916	1226.36	1301.19	584.082	596.218	672.54	844.085	1497.35	1474.94	1806.52	1285.24	1706.98	1063.92	1470.73	1016.7	1712.95	1231.48
ENSG00000090006	5355.81	2554.4	3896.38	3210.42	4603.78	3481.45	4733.52	5128.59	3381.68	4610.92	3972.18	3874.54	3420.65	4110.17	4018.26	2850.49
ENSG00000090013	1965.3	1607.02	1114.74	1588.92	1527.72	1237.3	2512.45	3066.91	1548.18	1761.04	2031.3	1672.34	1834.82	1614.24	1806.25	1543.22
ENSG00000090020	452.895	1062.26	1028.13	1057.85	746.523	1074.74	599.354	434.432	1386.37	410.575	1349.42	407.234	1029.85	432.778	1257.44	627.047
ENSG00000090054	2240.63	2086.02	2113.64	2206.92	1869.56	1868.46	2296.87	2906.58	2312.84	1963.89	2418.94	1881.45	2841.17	1942.88	2384.61	2294.35
ENSG00000090060	4441.11	3383.97	1184.49	1360.9	1678.66	1626.02	4905.72	6011.86	3955.97	4895.74	3694.35	3840.55	4640.52	4077.87	4359.9	3258.47
ENSG00000090061	1248.35	1230.42	366.35	478.785	641.648	683.889	1270.29	1304.18	1502.61	1397.58	1475.87	1148.39	1404.29	1200.37	1450.44	1019.89
ENSG00000090097	2367.39	2406.92	1683.7	1851.51	1833.32	1524.86	1922.74	1947.79	1558.77	2357.5	1928.82	1920.46	1635.87	2015.54	1918.3	2619.82
ENSG00000090104	0	0	0	0	0	0	0	0.960692	0	0	0	0	0	0	0	0
ENSG00000090238	399.577	213.811	214.238	248.186	178.652	243.021	499.499	544.281	395.207	266.296	498.426	386.983	570.904	334.928	500.398	177.894
ENSG00000090263	549.827	625.968	404.732	541.5	393.42	355.631	510.564	605.281	510.707	541.188	595.157	482.197	668.465	513.727	566.054	545.406
ENSG00000090266	698.956	893.79	708.861	821.171	700.063	693.8	463.246	553.763	641.377	620.584	773.154	561.056	582.548	616.772	698.325	1011.73
ENSG00000090273	3570.09	4399.01	3000.02	3078.44	2795.26	2740.16	2834.15	3005.33	3147.94	3535.69	3566.83	3091.3	3507.21	3142.48	3475.9	4691.25
ENSG00000090316	1105.09	1301.42	697.636	738.042	616.776	740.78	748.489	806.397	1014.97	1080.82	1260.44	1004.89	1168	1038.88	1224.69	1186.4
ENSG00000090339	19.2596	30.6281	17.3715	41.8175	10.3387	14.5923	21.2052	25.134	13.7452	6.07602	24.6335	11.4377	10.0543	15.3339	13.0322	28.8068
ENSG00000090372	2878.89	2129.28	1186.55	1224.68	1482.79	1429.71	2638.4	2788.29	2230.36	2727.75	2303.61	2368.46	2511.37	2443.59	2170.86	2328.59
ENSG00000090376	1.50924	0	4.42631	3.7664	1.48753	1.49702	1.4653	2.17186	0.741446	7.4977	3.78372	1.51705	0	1.52214	3.74921	2.27651
ENSG00000090382	17.7469	4.97279	22.4658	14.1689	20.5236	14.772	11.8849	7.40643	16.9028	9.98145	13.6051	13.1378	15.7969	7.75352	27.2387	10.2016
ENSG00000090402	0	0	0	0	0	0	0	0	1.96489	0	0	0	0	0	0	0
ENSG00000090432	656.672	963.199	514.5	625.504	475.53	562.385	526.395	536.101	660.277	567.72	776.118	510.91	644.429	477.857	659.604	795.607
ENSG00000090447	434.505	253.964	208.582	176.007	162.043	150.57	258.151	230.428	235.05	456.135	166.834	321.116	339.658	426.547	267.642	345.565
ENSG00000090470	1061.5	884.68	514.088	591.997	531.443	491.31	862.277	913.967	1150.44	901.077	1188.6	942.847	1282.34	756.572	1134.73	937.485
ENSG00000090487	3190.15	2914.59	1538.81	1806.09	1565.4	1586.24	2338.27	2783.68	2669.17	3162.97	2596.15	2948.51	2772.01	2873.88	2789.86	2983.33
ENSG00000090512	3.03068	6.00226	0.929704	1.79829	0	2.68261	5.1946	7.73733	16.7627	1.77452	19.4988	1.06523	19.2688	0	9.75773	0.935954
ENSG00000090520	3262.85	2934.28	3679.27	4004.29	3318.23	3645.66	2793.53	3093.92	3779.09	3369.75	4215.49	2773.01	4440.42	2833.84	3961.88	2451.44
ENSG00000090530	562.632	1246.77	755.212	1025.17	732.814	790.06	1593.9	1795.84	688.619	619.81	402.628	429.416	578.916	598.503	465.872	1248.99
ENSG00000090534	109.058	10.1122	25.544	38.8149	18.9805	12.3378	33.5855	42.72	70.0697	81.6391	76.5353	84.3843	97.1923	80.5962	72.5685	10.8357
ENSG00000090539	528.714	136.687	295.683	274.02	312.422	214.746	374.809	513.692	216.123	398.242	271.633	464.216	303.249	373.928	251.709	184.565
ENSG00000090554	88.7939	28.9027	35.1324	43.1712	44.1309	33.2291	68.198	51.9915	67.4815	98.7051	87.4754	79.4295	79.6294	64.4818	61.8769	29.2362
ENSG00000090565	800.765	580.725	541.748	373.842	554.555	477.235	690.366	574.1	656.75	697.538	789.203	741.234	674.448	726.573	724.079	624.635
ENSG00000090581	1475.07	820.959	1011.64	879.325	824.572	751.201	821.51	835.657	1133.51	1038.4	1150.98	1225.15	1254.86	944.831	1154.18	772.441
ENSG00000090612	838.796	777.881	433.255	429.953	307.848	399.929	487.748	505.281	607.877	919.768	569.441	729.723	580.564	729.724	516.442	987.107
ENSG00000090615	2109.32	2237.68	1512.31	1176.69	1194.76	1360.6	2508.86	2268.1	2022.93	1873.53	1297.5	1442.19	1196.55	1507.2	1897.51	2511.79
ENSG00000090621	4285.84	5325.82	5706.1	5219.19	5899.07	5312.41	2948.94	3496.82	5823.62	4124.1	5190.12	3032.43	5173.5	3600.66	5197.24	5345.73
ENSG00000090659	0	0	3.3232	1.99785	1.97812	3.43001	3.43967	2.78863	2.00627	3.08458	6.12353	1.00651	4.84278	5.08362	2.21936	2.02758
ENSG00000090661	395.733	253.335	294.267	286.405	306.196	224.013	354.984	476.246	239.953	305.615	267.148	362.435	317.573	309.556	263.749	355.458
ENSG00000090674	209.276	244.413	382.879	383.456	254.87	375.126	166.441	155.244	216.306	192.631	238.205	174.67	210.801	160.756	227.888	196.643
ENSG00000090686	1307.67	1568.23	1925.59	1677.46	1750.57	1588.15	1997.22	2259.72	847.5	1334.75	937.875	943.944	1262.86	1296.26	1007.8	1750.37
ENSG00000090776	409.381	1015.98	509.6	640.35	458.751	646.661	1097.57	1227.2	1496.02	377.643	2001	342.354	1455.75	369.209	1490.3	660.122
ENSG00000090857	4978.65	4065.71	2794.99	2313.98	2473.58	2550.86	3118.42	3245.63	3927.35	4276.75	3241.25	3560.73	3272.13	3593.4	3616.35	4311.89
ENSG00000090861	5445.46	4164.77	2479.84	2420.43	3167.23	2717.65	4145.47	4389.9	3355.06	5095.41	3120.8	4579.47	3278.18	4633.12	3449.19	4352.33
ENSG00000090863	8416.14	6858.91	4415.61	4169.47	4004.67	3781.31	8098.33	9129.64	5945.83	8270.49	5425.39	7255.65	6041.17	7654.82	6272.07	8121.19
ENSG00000090889	4629.8	2539.81	2017.25	1842.13	2027.39	1798.3	1635.35	1663.38	2309.2	4420.74	2366.25	3438.83	2713.12	3912.15	2841.25	3209.99
ENSG00000090905	2779.32	2839.37	2260.56	1663.35	1808.01	1506.23	1504.63	1455	2084.5	2850.07	1796.08	2080.25	1687.62	2128.26	1959.36	2245.09
ENSG00000090924	2178.62	1190.41	1154.21	1160.93	1499.08	1040.37	1064.13	1277.61	1585.54	2025.41	1394.23	1584.8	1478.84	1624.04	1749.65	1452.31
ENSG00000090932	45.3298	72.6152	36.3008	52.6753	48.7685	54.2976	52.1606	83.0713	44.121	58.5939	57.2099	46.1479	57.1486	51.7302	69.4623	49.822
ENSG00000090971	543.802	285.495	457.157	443.977	535.325	387.029	209.377	199.452	438.144	466.057	500.647	412.85	412.977	537.214	406.204	340.004
ENSG00000090975	112.255	310.415	329.756	178.176	90.8264	79.0121	199.203	372.083	258.119	260.371	222.027	191.896	281.35	148.083	267.733	233.3
ENSG00000090989	1861.67	1625.85	1507.46	1234.59	1306.19	1277.82	1724.36	2359.47	1696.73	1763.42	1896.7	1650.38	2039.23	1510.66	1972.75	1689.13
ENSG00000091009	2064.83	1874.45	812.532	962.937	967.234	994.455	1158.71	1640.16	2226.91	2360.31	2160.23	1830.54	2147.45	1635.25	2506.38	1425.35
ENSG00000091010	1.001	1.00221	1.97509	0.99918	3.9463	3.9742	2.91368	2.87739	5.90353	6.95909	7.02821	1.00923	6.71379	1.00378	5.96925	3.99471
ENSG00000091039	2480.63	2613.58	821.143	886.617	638.929	775.899	2167.33	2327.56	2155.73	2161.06	1998.7	2321.21	2320.31	1874.97	2183.11	2491.52
ENSG00000091073	603.404	586.74	633.405	615.102	473.366	492.143	458.483	436.434	384.119	544.27	449.15	481.37	360.047	432.582	528.817	633.245
ENSG00000091106	0	0	0	1.99827	0	0	1.94291	0	0	0	0	0	0.958929	1.00341	1.99003	0
ENSG00000091127	615.017	1194.75	1261.66	1135.45	1143.33	1084.25	463.978	505.57	619.391	724.603	576.93	606.129	501.544	532.235	543.137	1086.64
ENSG00000091128	7.16896	2.74693	6.7459	9.0356	3.72852	7.41867	2.23509	5.33822	4.57047	9.86848	5.34626	6.38836	5.70169	4.97538	3.8106	5.08715
ENSG00000091129	84.0869	37.2753	109.108	62.6295	82.821	46.5626	188.136	192.056	32.6126	61.2842	35.3531	59.6293	94.3321	72.7887	41.4656	62.9555
ENSG00000091136	6255.96	3830.69	6682.19	5739.43	7552.14	8176.77	10829.1	11613.8	4873.2	5148.72	4681.85	5413.53	7330.2	4372.77	4711.53	4166.75
ENSG00000091137	13.6216	8.17511	27.1547	17.5204	11.3118	11.3622	7.30729	19.476	10.3872	11.8846	8.71583	24.1034	19.8578	26.195	6.10484	10.8898
ENSG00000091138	0	0	0	0	0	0	0	0	0	0	0	0	0	0	0	0
ENSG00000091140	1716.98	2965.96	1173.6	1441.01	1091.75	1179.81	2333.35	2305.02	1886.23	2295.51	1898.85	1782.38	1909.09	1852.27	1790.02	3051.28
ENSG00000091157	821.046	755.763	251.025	336.033	223.669	185.66	535.754	731.19	454.528	748.384	443.475	472.793	736.58	459.221	596.786	501.19
ENSG00000091164	1517.19	2019.99	1328.25	1617.86	1248.35	1290.67	1557.82	1977.82	1078.95	1581.76	1137.99	1328.17	1443.73	1345.38	1258.71	1929.56
ENSG00000091181	0	0	0	0	0.98669	0.995188	0	0	0	0	1.00409	0	1.92085	0	0.994993	0
ENSG00000091262	69.3195	23.0003	71.3474	43.7119	36.4315	41.8326	71.2462	76.5329	43.2543	74.9827	49.8229	94.6141	74.6366	81.2168	29.5067	36.1643
ENSG00000091317	4346.73	3912.93	1925.98	2185.6	1419.57	1710.85	3042.53	3289.18	4159	4153.58	4318.39	4011.79	4467.14	3823.9	4523.02	3400.34
ENSG00000091409	3699.83	3504.73	1468.3	1546.7	1045.64	1314.14	4098.69	4338.64	5303.79	3327.45	5653.52	2804.82	5638.06	2897.47	5283.77	2712.26
ENSG00000091428	28.6078	14.0545	54.1294	16.4522	46.1585	38.7906	30.126	36.8892	17.3424	27.8783	15.5691	63.797	42.6921	41.0878	18.3657	44.1983
ENSG00000091436	6895.15	5466.27	2281.96	2265.76	2209.51	2184.66	3457.12	4015.46	3565.01	6544.03	3517.46	5624.62	3675.67	5948.34	4042.05	6598.43
ENSG00000091482	4.74368	3.0627	9.70715	4.73965	3.0562	6.69333	1.53188	4.39646	1.50633	2.36237	0.792535	5.02026	6.94099	1.54157	1.87211	1.46551
ENSG00000091483	2189.52	3372.8	2171.17	2754.85	2030.13	2062.03	2117.16	2489.14	2042.26	2101.67	2167.82	1870.17	2252.84	1943.46	2159.24	3208.59
ENSG00000091490	2641.73	2518.89	2653.52	2318.35	1376.97	1536.28	3768.25	3858.05	2399.76	2674.12	1983.36	2448.82	3104.79	1971.91	2505.49	2120.28
ENSG00000091513	215.734	246.981	377.801	328.614	338.069	333.998	228.347	247.95	218.377	225.202	194.422	192.504	188.116	216.502	248.219	258.244
ENSG00000091527	6528.97	9115.98	3537.95	3999.29	2972.49	3655.27	4580.55	4947.55	8253.01	6935.99	7949.99	5607.63	9301.81	5616.91	7941.8	8437.68
ENSG00000091536	8.35878	13.9344	11.1395	11.8054	12.4808	24.1198	10.6227	12.8752	17.4005	1.82551	10.4106	4.2063	16.6742	11.82	16.0991	12.8164
ENSG00000091542	2040.33	1949.37	1002.26	1264	1112.92	1003.15	1923.63	2053.09	1530.35	1899.4	1670.79	1492.03	1653.97	1506.03	1731.32	2091.49
ENSG00000091583	2.44546	0	0	0	0	0.605956	0	1.07011	0	1.0435	0	0	1.06766	1.13395	0	0.60289
ENSG00000091592	96.9167	694.165	1300.53	1040.84	697.914	673.5	570.145	586.241	217.596	71.9393	200.433	54.2535	169.943	86.9009	137.644	641.866
ENSG00000091622	468.897	323.665	379.148	316.998	437.754	278.345	555.762	575.42	304.072	488.308	294.164	418.663	399.391	376.678	324.946	384.788
ENSG00000091640	575.784	520.013	476.2	507.762	520.038	504.661	650.642	824.637	592.286	546.859	533.908	433.687	649.296	395.708	566.74	520.858
ENSG00000091651	1014.37	994.126	1089.76	805.298	967.135	891.761	629.222	661.765	887.815	1099.57	925.957	829.509	974.946	939.984	987.694	1117.01
ENSG00000091656	1965.95	1080.55	498.24	378.623	411.365	434.386	1151.8	999.737	1056.55	1807.41	1122.14	1491.07	1042.61	1494.01	1438.88	1072.01
ENSG00000091664	0	0	0	0.999212	0	0	0.97163	0	0	0	0	0	0.960208	0	0.99511	0
ENSG00000091704	5.63694	0	1.93573	1.96259	2.40666	3.90407	1.92997	1.16502	4.01957	4.06256	3.72306	0	3.54726	0	2.9513	0.735283
ENSG00000091732	341.099	431.175	388.249	378.718	379.232	311.449	257.37	242.254	341.017	290.057	302.872	292.047	264.385	286.812	368.627	461.527
ENSG00000091831	61.5087	0.823263	3.24745	0.820921	0	3.26485	6.27768	7.10254	1.61601	21.7699	0.825259	0.826863	3.94738	0	1.63544	0
ENSG00000091844	182.83	108.977	123.979	128.614	93.6464	64.7659	230.123	266.502	117.754	178.463	108.568	169.853	151.714	162.112	146.483	124.192
ENSG00000091879	7.25965	4.31184	4.41791	6.18487	4.58181	6.2498	3.15628	0	3.39764	4.94689	2.50193	1.11015	3.08052	1.72644	3.45061	3.20847
ENSG00000091947	849.449	718.529	724.261	811.219	630.694	592.483	623.422	711.176	692.161	740.019	865.671	685.009	744.906	629.22	765.13	723.037
ENSG00000091972	234.7	61.5331	70.6909	73.2626	62.2999	72.2208	46.5134	51.3461	93.7834	204.292	105.861	178.247	131.398	202.71	124.234	78.0193
ENSG00000091986	4872.75	3086.31	2008.6	2214.8	1391.64	1211.11	3735.05	4133.03	3503.42	5221.24	3460.7	3643.71	4601.96	4083.51	3981.93	3619.32
ENSG00000092009	0	0	0	0	0	0	0	0	0	0	0	0	0	0	1.98963	0
ENSG00000092010	3298.8	2160.4	1588.35	1940.01	1664.43	1456.78	2477.9	3123.09	2626.73	2883.72	2778.67	2602.5	3356.95	2592.49	3135.94	2335.83
ENSG00000092020	473.656	472.335	499.495	456.793	531.39	479.899	787.156	756.166	323.954	361.216	373.618	453.486	528.015	374.321	398.275	458.325
ENSG00000092036	1343.47	623.967	440.266	414.249	511.297	426.159	687.2	845.053	771.681	1326.04	909.701	1287.36	1276.87	1168.35	1093.7	778.505
ENSG00000092051	2726.64	848.767	629.647	640.37	800.479	589.194	1022.14	1067.91	1150.33	2480.2	1172.2	2265.23	1448.52	2435.74	1508.25	1047.33
ENSG00000092054	0	0	0	0	0.986796	0	0.971677	1.92063	0	0	0	0	0	0	0	0
ENSG00000092067	0	0	0	0	0	0	0	0.957629	0	0	0	0	0	1.0049	0	0
ENSG00000092068	172.638	96.64	59.8356	52.1164	41.5367	55.3357	191.422	160.159	133.278	169.056	127.452	158.273	183.756	153.759	186.724	74.2956
ENSG00000092094	1271.87	1039.34	1720.7	1387.86	1732.99	1415.11	709.09	796.282	957.285	1242.42	943.03	980.213	1170.4	1013.23	981.912	1075.59
ENSG00000092096	771.507	175.468	316.003	349.29	400.298	351.735	594.592	635.258	491.085	579.755	563.995	552.98	487.405	467.619	585.767	265.239
ENSG00000092098	1067.97	752.623	1127.79	862.966	1256.27	990.673	724.199	900.853	800.237	920.029	933.311	723.441	749.65	806.683	845.682	880.21
ENSG00000092108	1570.64	1917.8	1302.89	1512.94	1441.3	1544.49	1984.56	2658.03	1104.87	1743.83	1240.95	1272.95	1468.48	1432.8	1302.96	1806.24
ENSG00000092140	1210.41	1060.94	848.835	780.227	899.804	865.598	974.838	1222.31	904.486	1096.44	846.464	929.732	1172.47	1157.13	1111.93	1395.61
ENSG00000092148	3999.67	3461.43	3655.54	3305.95	3675.98	3681.52	3043.45	3404.62	2727.78	3556.71	2748.71	2849.02	3121.84	2976.42	3215.03	3749.66
ENSG00000092199	18815.3	17315.6	10673.9	12706.8	11541.2	10677.4	13409.8	16304.9	16881	19339.3	17215.5	15788	23850.7	16603.6	18573.1	17471.6
ENSG00000092200	12.5958	5.2772	4.54521	5.25505	3.18409	3.58178	4.3804	5.77938	7.19749	11.0229	4.98362	6.70669	1.8923	12.1352	3.72284	3.59435
ENSG00000092201	7635.99	6126.24	3332.58	3047.37	3889.27	3572.2	4189.94	4190.59	5802.37	7708.62	5423.91	6271.29	6406.28	6666.29	6309.47	6460
ENSG00000092203	2283.36	2421.75	597.388	860.211	810.431	875.076	2188.67	2496.21	2353.34	1885.49	2228.09	1776.97	2341.43	1881.76	2237.65	2199.76
ENSG00000092208	382.726	382.341	235.938	233.124	291.824	262.582	432.75	498.597	278.931	407.677	333.286	317.002	361.015	363.853	375.463	360.095
ENSG00000092295	173.597	251.915	148.856	190.046	188.147	161.065	28.9312	42.3468	75.6733	167.913	139.427	142.756	120.449	114.081	128.34	346.764
ENSG00000092330	1214.9	780.572	411.936	551.527	585.566	534.298	956.38	1055.08	1227.61	1145.92	1214.19	1104.72	1197.41	1030.12	1228.62	879.914
ENSG00000092345	0	0.754579	0	0	0	0	0	0	0	0	0	0	0	0	0	6.73792
ENSG00000092377	0	0	0	0	0	0	0	0	0	0	0	0	0	0	0	0
ENSG00000092421	321.991	107.674	64.8166	52.509	98.3632	41.1846	415.497	411.713	175.444	300.062	143.088	212.404	405.124	167.594	126.575	98.323
ENSG00000092439	1790.95	1607.89	1668.33	1462.68	1617.89	1372.26	990.58	1105.09	1354.31	1618.19	1370.44	1480.31	1747.7	1464.36	1346.14	1183.6
ENSG00000092445	1177.4	802.06	692.122	652.735	603.47	539.205	830.167	796.72	842.261	1185.57	1012.19	990.031	954.643	922.191	786.816	851.277
ENSG00000092470	1197.35	527.944	288.801	284.371	283.592	180.043	267.435	330.524	325.428	1334.84	320.007	1155.94	575.828	1148.25	544.467	824.349
ENSG00000092529	33.8675	6.93067	41.4677	35.4125	21.4283	16.4482	6.84318	0	13.1988	11.8088	19.5392	6.64081	9.67107	12.1321	11.5196	13.0099
ENSG00000092531	2201.76	1432.93	493.983	564.417	528.706	514.492	2035.8	2511.85	1802.32	1862.28	1785.59	1677.75	3406.92	1633.99	2035.68	1570.23
ENSG00000092607	209.167	241.687	179.034	148.204	185.481	141.518	237.928	290.558	196.519	253.253	201.479	204.764	209.711	227.891	192.889	286.04
ENSG00000092621	5546.17	4160.61	2801.59	2986.35	4039.09	3118.87	3620.01	3985.58	2982.1	5614.79	3318.74	4875.6	3559.14	4693.89	4072.19	5093.87
ENSG00000092758	10.1873	7.89739	9.49637	4.52191	12.8996	6.58844	5.89965	3.85975	5.68952	14.2372	11.4154	8.0694	4.41093	3.46273	10.8161	2.81934
ENSG00000092820	8364.18	12630.7	7338.59	7070.31	7212.34	7326.82	7202.45	7491.08	11565.5	8928.07	12302.7	6660.26	11228.5	6795.38	11155.4	11979.2
ENSG00000092841	11692.9	10215.9	5658.22	7441.3	7026.73	5925.33	7200.59	9010.4	9419.7	11930.2	9842.68	9660.14	11109.5	9634.35	9877.09	11600.9
ENSG00000092847	3718.92	4266.71	1264.15	1299.58	1146.47	1178.9	2661.39	2709.38	2814.68	3111.58	2430.12	2911.66	2294.76	2664.23	2786.7	4340.47
ENSG00000092850	0.893956	0.895639	1.76306	2.88367	1.76176	0	0.866911	4.27609	0.741677	0.888745	2.68942	2.01935	3.7873	0	3.5532	0
ENSG00000092853	3299.99	1740.14	1044.55	705.567	745.612	763.491	643.315	681.885	1666.97	3123.62	1479.91	2865	1727.39	2735.18	1689.93	2382.52
ENSG00000092871	1366.13	799.604	298.009	337.326	280.894	223.759	577.874	578.879	812.266	980.516	964.667	1007.25	849.775	956.676	972.489	931.037
ENSG00000092929	396.025	881.837	854.608	808.127	1060.55	919.663	532.308	369.575	393.476	382.65	464.58	414.421	348.46	373.826	470.007	1144.93
ENSG00000092931	537.415	381.927	489.852	396.996	518.079	409.041	279.218	314.596	556.671	555.646	591.02	546.412	485.568	504.657	520.203	392.69
ENSG00000092964	3132.94	1536.64	1236.76	1054.43	1188.06	849.623	1289.89	1241.54	1414.94	3113.19	1427.47	2503.77	1218.17	2783.01	1713.89	2435.01
ENSG00000092969	4194.9	6254.1	5927.35	5787.24	6673.69	5974.65	6725.46	7417.49	2664.43	4984.97	2668.5	3458.94	3011.15	3525.73	3245.4	8703.49
ENSG00000092978	429.617	533.948	481.904	405.277	335.291	385.317	605.671	606.362	612.99	529.468	513.845	404.965	737.731	392.03	715.965	501.822
ENSG00000093000	4059.95	4725.71	2145.7	2182.71	1845.11	1789.92	2853.45	3345.35	4052.31	3960.54	3600.12	3408.88	4286.61	3509.05	4362.89	4456.48
ENSG00000093009	2062.08	1600.8	1999.46	1434.61	1947.03	1415.7	711.358	766.982	1044.32	2136.17	863.575	1510.16	1433.93	1726.84	1221.82	1784.68
ENSG00000093010	1697.7	1978.79	1522.78	1712.93	1435.87	1398.71	1023.91	999.968	1200.63	1474.9	1565.35	1321.52	1268.75	1372.87	1369.86	1743.77
ENSG00000093072	10.6286	5.47975	8.6077	6.3047	11.2618	4.35061	7.20702	2.62766	13.3774	0.965226	7.98202	5.63991	11.3483	9.20664	20.458	6.49637
ENSG00000093100	293.243	86.4373	978.736	581.12	664.508	530.657	68.3372	35.0176	166.04	289.136	258.486	119.086	122.62	182.276	184.246	150.238
ENSG00000093134	1.0018	0	0	0	0	0.99544	0	0.956671	0	0.997106	0	3.03738	0	1.00767	0	2.96303
ENSG00000093144	1430.42	1880.68	1089.34	1317.45	1023.79	1067.74	962.209	1115.63	1106.05	1497.79	1114.18	1344.62	1396.37	1355.04	1083.59	1986.86
ENSG00000093167	1528.54	1716.65	1148.02	1138.39	1092.02	939.467	1399.91	1699.13	1238.39	1566.76	1160.08	1183.35	1446.11	1388.82	1306.59	1672.33
[truncated: 58,122 more rows]
